# Supplementary material for: Workflow for Genome-Wide Determination of Pre-mRNA Splicing Efficiency from Yeast RNA-seq Data
Source: Biomed Res Int. 2016 Dec 6;2016:4783841. doi: 10.1155/2016/4783841 (PMC5168555; doi:10.1155/2016/4783841)
Supplement: Supplementary file 1 — The Supplementary Material contains a table of PCR primers used in this study, and all scripts required to run the analyses of splicing efficiency presented in Figures 2 and 3. The scripts are commented and can be easily adapted for other RNA-seq datasets. An adaptation of the workflow for processing RNA-seq data from the fission yeast Schizosaccharomyces pombe is also included. [file 4783841.f1.zip]

Archive with 54 entries (40 files):
- pombe_E-GEOD-47573_cwf10/
- pombe_E-GEOD-47573_cwf10/.Rhistory
- pombe_E-GEOD-47573_cwf10/workflow.sh
- pombe_E-GEOD-47573_cwf10/junctions.R
- pombe_E-GEOD-47573_cwf10/efficiency.R
- pombe_E-GEOD-47573_cwf10/folders_readme
- pombe_E-GEOD-47573_cwf10/FASTQ/
- pombe_E-GEOD-47573_cwf10/genome/
- pombe_E-GEOD-47573_cwf10/genome/Schizosaccharomyces_pombe.ASM294v2.29.dna.toplevel.fa
- pombe_E-GEOD-47573_cwf10/genome/Schizosaccharomyces_pombe.ASM294v2.31.gtf
- pombe_E-GEOD-47573_cwf10/FASTQ_individual/
- pombe_E-GEOD-47573_cwf10/FASTQ_individual/place_fastq_files_here
- prp4/
- prp4/efficiency.R
- prp4/junctions.R
- prp4/folders_readme
- prp4/workflow.sh
- prp4/.Rhistory
- prp4/genome/
- prp4/genome/Saccharomyces_cerevisiae.R64-1-1.84.gtf
- prp4/genome/genome_tran.2.ht2
- prp4/genome/genome_tran.5.ht2
- prp4/genome/genome_tran.7.ht2
- prp4/genome/genome_tran.6.ht2
- prp4/genome/genome_tran.3.ht2
- prp4/genome/genome_tran.8.ht2
- prp4/genome/Saccharomyces_cerevisiae.R64-1-1.dna.chromosome.I.fa
- prp4/genome/genome_tran.1.ht2
- prp4/genome/genome_tran.4.ht2
- prp4/genome/make_r64_tran.sh
- prp4/FASTQ_individual/
- prp4/FASTQ_individual/place_fastq_files_here
- prp4/FASTQ/
- prp40/
- prp40/efficiency.R
- prp40/junctions.R
- prp40/workflow.sh
- prp40/folders_readme
- prp40/.Rhistory
- prp40/FASTQ/
- prp40/FASTQ/place_fastq_files_here
- prp40/genome/
- prp40/genome/copy_from_prp4_folder
- prp45/
- prp45/efficiency.R
- prp45/workflow.sh
- prp45/junctions.R
- prp45/folders_readme
- prp45/.Rhistory
- prp45/genome/
- prp45/genome/copy_from_prp4_folder
- prp45/FASTQ/
- prp45/FASTQ/place_fastq_files_here
- primers.xls
