# Supplementary material for: Workflow for Genome-Wide Determination of Pre-mRNA Splicing Efficiency from Yeast RNA-seq Data
Source: Biomed Res Int. 2016 Dec 6;2016:4783841. doi: 10.1155/2016/4783841 (PMC5168555; doi:10.1155/2016/4783841)
Supplement: Supplementary file 1 — The Supplementary Material contains a table of PCR primers used in this study, and all scripts required to run the analyses of splicing efficiency presented in Figures 2 and 3. The scripts are commented and can be easily adapted for other RNA-seq datasets. An adaptation of the workflow for processing RNA-seq data from the fission yeast Schizosaccharomyces pombe is also included. [file 4783841.f1.zip › pombe_E-GEOD-47573_cwf10/genome/Schizosaccharomyces_pombe.ASM294v2.29.dna.toplevel.fa]

>MT dna:chromosome chromosome:ASM294v2:MT:1:19431:1
AATGTGTAATTTGAATCAATTTCTATCCTTTTAAAAATACATCATAAAGTGTACTTTTTT
AAGGATTTAGTTATTAAAGGATTAATTATGGATTGCTAACCAGTTAATATTAAGAGGAAG
CTTTTAAAGCTTAATTCAGCAATTTTTTAATTGTTGTTTCTCCTAAAGGTAAACCACTAA
AAAGAAAGAACTTCGGGTTTTTCTTTAAAATAAACTAGAGGAACTGAATCATCTTAGTAC
TCTAAGGAAAATAAAATAACAATGATTATTGTAGTAGTGGCGAACGAATCATTAATAGTC
TAACTTATAAAAATATTAAAAAAAATTTTTACCAAAGAAGAGAAAAATGGGTTCTTCATT
TTTAATAAGTAATAAGTAATAAAGTAAAATGGGAACTTAACCTGTTTGAATATTGGAGAA
CCAATCTCCAAAGACTAAATATATTAACTGAGTGATAGTGAAGAGTACCGTAAGGGAAAG
CAATGAAATAGTTAATCTATAAGCGAAGATAGTGAATTTTAAATAAATTATTATCTTGTA
CCTTTTGCATAATGGGTCAGCAAGTTTTAATTATTTGCAAGCTGAAAAGCCATAAAGTAA
ATAATTAAAGACCCGAAACCTGACGATCTTACCATGAACAGATTTTAAGGATCGAACCAG
TAATCGTTGCAAAGATTTTGGATGATTTGTGGTAAGGGGTGAAATGCTAATCGAGTTAGG
TGATAGCTGGTTGTCCACGAAACCATTTTAAGATGGGCACTTCAAAAACTAAATGAGGTA
CAGAAATTTATTGCCTTCAAGAAGTTTTTTCTTGTTAATAGGGGATCTAAAGATTTACCT
AAGGCGTTAATTAATCTCGGAATAAATTTAAAAAAGTTTGAAGTAGTTAGACAATTGGCG
ATAAGGTCAATAGTCAAAAGAGAAACAGCTCAGATCAAAGATTTAAAGTTCCCCAATTTA
AGTTAAGTGATTTAAAGATAGTCTTACTCCTTATTCAATAAGAATATGGGCTTGGAAACA
GCCATTATCTAAGGAGTACGTAATAGTTCACTTATCCAAAAAAAATAATATTTTCTGGAG
AAAGGCATCAAAAATTTAACGGATCTTAAACTTAATACTTAAACTTTGGCAGTATTTTAA
AAATACTGGGTAGTGGACCGATCTATATAAAGATGAAGATGAACTTTTAAGTTTATTGGA
TTTATTAGATGCGAGAATGCTGACATAAGTAACGTAAAAAAAGGTCAAATTCCTTTTCAC
CGAAAACTGAAGGGTTTTGACTTAAAAAGCTTAGCTTAAGTCAAATAAAGTAACAATCTC
TAAGCTAATAAATAGTGATGAGTAAATCTTAACGGATCTTAAAATAAAAGTTTTATTGAA
TAGAAATTTTTATTCAGGAAAATTATCCGTTATTTTAATTGTACCCTAAACCGACACTGG
TCAGTTAAGAGAATATCTTAAGGTGTTGAGAGAACTATGCTTAAGGAACTCGGCAAATTA
GCTCTGTTACTTCGGTATAAAGAGTGTTCATTATTTTATGAACTCAATAAAGAGAACCCT
ACAACTGTTTACTTAAAACACAGCACATTGCCAAAATTAAAAAATTATAGTATAATGTGT
GAGGTCTGCTCAATGTCCTATGGTTAACAATACGAACTTTAACGAGTTTTACGGAACCCA
GGATAAATAGCGGCTTTAACTCTGAGGGTCCTAAGGTAGCGAAATTCCTTGTCCGATAAA
TACGGTCCCGCATGAATGACTTAATGATAGGGTTGCTGTCTCAAGCACAGACTCAGTGAA
ATTGTAATTGCTGTGAAGATACAGTGTTCCCTCAGCTAGACGGAAAGACCCTGGCAGCTT
TACGATAGTTAATTATTGATTAAAGAAAAAATCATCCAAAAGGTGATCTCTTCTTTCTCG
CTTTATCTATTTTTGTTCAGTATAGAGGTTAGTCGTTTAGACAAAAATGAGATATCCTCC
TTAAATAATAAAGATCTTTAAAGTTTAAACTTGACATTAATTAATTGATCGTTTCTGTGG
GGCGCAGGCCTCATAAAAAATAACTGAGGTATCCTAGATCTATATAATTTATCTAGAAAT
CAAAGTATCCAGAAACATTTTTTAAGTGTTTCTTAATTAAAGATACATGACGCATATAAG
CATAAATAGGTTAAACTGAAAGACTAACAAGTCGCACAGATATGTAAATAGGGTTAAATG
ATCCACATTGAAACACTAATTTAGTGTTTGTATGGAAAACAATGTGCTCAATGAGCGAAG
TTACGCCAGGGATAACAGGTTAATAGAGAGCTAAAGTACAAATCAAATTCTCTGTTTGAC
ACCTCGATGTCGACTCAACCTATCTCCGGTTGTAGCAGATTGGAAGGGTTAGACTGTTCG
TCTATTTAAAAGGTTACGTGAGTTGGGTTAAATCCGTCGTAAGACAGGATGGTTCCTATC
TACTGAGGGAAAAATAAGCAAATTAAAATTTATCTTTTGTACGCAAGGATTTAGATAATT
CAATCTCTAGTTTAACTATTGTTACTTAAATAAAAGTACTTTATTCAAAAGTTAAAAATT
AAGTAGCACGGTAGTAAAGCCAAATTGAACAAATTAAAAACTGAAAGCATCTCAAGTTTG
AAATTTATTTAAAGAGCTTATATTAAGAAAGTAGAAAACTTTCCAAAAGGACATCCTTAG
GATGTACAAATCCTTATTTTAGTAAATCATTGTTTAGATAGATTTAGTTAATTTTTTAAC
CAAAGGGATTATCTCTTTGCTAATTTTTTAAATAACTGGAAATTGCCTAATTACACAATT
TTTTTTACCATTTTTTTGATGAGGGTATTGTTTAAAGGGGATGTAGCTCAATGGTTAGAG
CTTTCGCCTTTTAAGCGATAGGATAAGGGTTCAAATCCCTTCAGACCCATAAATAAAAGA
ACTAACTTCTCATAAAAGTGAGTTAAAGGAAAAATAGTTCTAATTGGTAAGAAGGATACT
TGCTACGTATCTGGTGAATAACCTTGTGAGTTCGAGTCTCACTTTTTCCGTAAATATTTG
TTGTTGTAGCTCAATGGTAGAGCAAGTCACTGTTAATGACCTGATAGTGGTTCGATTCCA
CTCAATAACGATAAAAATATATATAATGAGTTTGATGTTAGCTCGGTTATAACGCTATCT
AGAGATTTTAACACATGCAAATCGAACGAATCAACAAAAACAATACATCCTTTAGGGGAT
GTTTGTGTTTTTTTGTGACGTGGTGAACAGGTGAGTAAAAGGGAAGAACGGACCTTAAAT
TTCGGCTAAATTCCGAATAAACACACTCTTTTGGAGTGTTGTGAAAGAAGTGAAAACTTT
GATTTAAGACTGGCTTCTTACGATTAAAGTAGTTGGAGAGGTAAAAGCTTAACAAGCTCA
AATCGTAATCATGACACTAAGTGGTGCTCTGATCACATTGGCTCTGAGACAACAGCCAAG
ATGAACATTTAGTTCATCCAGCAGTGGAGAATATTAGTCAATGATCGAAAGATTGAACTA
GTCATCTAGAAGAGTGAAACTTTTAGTTATAGCTCCTTAAATTAAGAAAATTTGATTCTT
AATTTTATGTAATTCTTGCCAATTTCCGTGCCAGCAGCAGCGGTTATACGGATAGAATAA
GCGTTTAACATAATAAAAAGGCCTAAAAAGTATGTAGATGGAAAAAAACAAATCTTTTTC
TAGAGTAATAAAGATGTTTGTAGTATTGTCAAATAAGGGATCAAATCCGACAATCTTGAT
GAGACTGCTTAAGTAAAAACTACTTACAATTAATTACTGACATTGAGATACGAAGGCTTA
GATCGCGAAAGAGATTAGATACCTCTGTAGTCTAAGCTGTAAACGATTATTGCTCTCCCA
ATCTTTTTGATTGGGTTTAGTGAAGACGGTAAGCAATATGCCTGGGGAGTACTTTCGCAA
GATTGAAACCCAAAACATTAGACGGTCTTGGAAATCCGCAGTGAATCATGTTATTTAATT
AGATAATCCGCTAAAAATCTTACCTTTCCTTAAAACAATTAGTTTTAATTGTTGGGTATT
GCATGGCTGTCTTTAGTTAATCTCGTAAGATGAGGTTAATTCCCATTAATTAACGAAAGC
CTTCAAAGAATTTGTTTTTCTTTGTGTTAGTGATAAGCTAACTTTTTAGAGGGTTAAGAC
AAGTCAATATGATCCTTATGGAAAGGGCTATAGACGTGATATAAAATCTAATCCAATAAT
TTTTAATATCGAAAGATTGAAGTATTATTATAATGGTTAGGAGATTTATTCAGATTTAAA
TCTGTAATTTGATTTAATGAAGGAGGAATTGCGAGTAATCACTAATCATTACGTAGTGGT
GAAATTTATCTCTGAGATGTACTAACTACTCGTCAAGCGCTGAAAGTATTAATCTCTTGA
AGAAGACATTCATTTGTTTTCCCAAGGTGTTGTGCAATTAGTGTTAAGTCGAAATAAGGT
AACCGTAGTGGAAGTTGCGGTTGAACTAATTAATTCAGGTTAACCCCCCCCCAAAAAATA
AAATACATCCATATCAAAAAGATGTTAATTGTTGGTATAGTTTAATTGGTTAAAATAATC
TCCTCATGTGAGATTGATCTATAGGTTCGAGCCCTTTTACCAACTTTTCCTTAACCACAT
CTGTTTAAGTCAAAAAATCTTAAATGGTAGGAAACCTTTAAACAAAGTTTAAAAAAGTTA
TTAAATAATCTTAATGATCTTTTCATCTACCCTAAAAATATTGAATCCTTTTAAAATAGT
TTAATAAATTAGCTTTTGGATGAAAACTAAAAATTTTTTTTTAACTTAAACTTATTTAGA
AATTAATAATTTAGTCTTGAGTTTAATGAACTCTTGGTGGACTTATGTTAATAGATGGAT
ATTCTCAACTAATGCTAAGGATATTGCCATACTATATTTATTATTCGGATTGGTATCTGG
GATAATTGGATCTGTATTCTCTTTTATAATTAGAATGGAACTATCAGCTCCAGGATCTCA
ATTCCTTTCTGGAAATGGTCAATTATACAATGTTGCAATCTCAGCACATGGTATACTTAT
GATTTTTTTCTTCATTATTCCTGCTTTATTTGGTGCATTTGGTAATTATTTAGTACCTCT
TATGATAGGTGCTCCAGATGTTGCTTACCCTAGAGTAAATAATTTCACATTCTGGTTACT
ACCTCCTGCTCTAATGCTATTATTAATTTCTGCATTAACAGAAGAAGGACCTGGTGGTGG
TTGGACGGTTTTAAAGCCGCAGACAAAATTGTCTGAAAACTCTTCTCGATGCGAAAAAGT
CCTCTACTCGGAAGTAATTACTCAGTTAATTTATTTTTTAACTAGTAAAAAGATTACTAA
CTTGGGGAAAATTCGCCTGGTTAAATCCATCAGAGACTCGTTTCTATCACAATTAGAAAA
TATTTTATGTTTCTTTTTGGTTTATAGAACAACATACTCTTTCGGAGTGTGTTTAATGAA
GAGGTTCTTATTTAATAAATTTTTTAATAGACATCCTTTTACAAGGGTAAAAAGCTGTTT
TTCATCATCTTCACCATCAAAATTCTCTTTTACTCAATGGTTAGTAGGATTTACTGATGG
TGATGGTTGTTTTAGTATTTCAAAACAAAAAATAAAAAATGGCAAAAATAAATGGTCTCT
TACTTTTAAATTAACACAAAATCTTTATAATTATAGAATTTTATATTTTATTAAGAGAAA
TTTAGGTATTGGTTCACTTTATAAAGAATCTTCAACTAATACAGTAATATATAGATTAAG
AAGAAGAGAGCATCTTAAAAAGATTATAGATATTTTTGATCAATTCCCTCTTTTAACTAA
AAAATATTGGGATTATTATTTGTTTAAAAAAGCATTCTTAATTTTAGAGGACGCTAATCT
AAATTCTTTTGAAAAAAATAGTAAACTAGAAGAGATCAGAATAGAGAAAAAGTCTTTAAA
ACAATATTCTCCAGTTAATTTAGAAAAATATTTAACAAAGTCTTGGTTAATTGGATTTAT
TGAAGCAGAAGGGAGCTTTTATTTACTACAAAAAAGCCCTGTAAGAATAATTCATGGGTT
TGAGATTACTCAAAATTATGAACAACCCCTACTTGCTCAGATTTCAGAGTTCCTATTTAA
TTCTCAAATCTCACCAAAAATAAAATCAAAAAAAAATTCCTTAATTACAAATTATTCCTT
ATCAACTAGTTCAAAAGAAAGAATGTTATTTCTTTCATCTTATTTTGAAAATTGTTTTAA
AGGAGTAAAATCATTAGAATTTAAAATTTGGTCTAGATCTTTACGTAAAAATTATAATTT
TGAACAGCTTTTAAGAGCTAGAGATTTAATTAGAAAATTAAAAAATAAATATTCCCGAGG
ATCACAACATCCAAAGGATAAATAAAATAAGTTCAAGGTATAGTCCGATCAAGATTGAGA
AATCTTGTTAACTAAAATGATATCCACCACTATCAAGTATCACTTCTCATAGTGGTCCAG
CTATTGATCTAGCTATTTTAAGTTTACAATTAACTGGTATTTCATCAACATTAGGATCAG
TAAATTTAATAGCGACAATGATTAATATGAGAGCTCCAGGATTAAGTTTATATCAAATGC
CATTATTTGCATGGGCTATAATGATTACATCAATTCTATTACTGCTTACTTTACCAGTTT
TAGCAGGTGGATTATTTATGTTATTCTCAGATAGAAATTTAAATACTTCATTCTATGCTC
CTGAAGGTGGTGGTGACCCTGTACTTTACCAACATTTATTCTGGTTCTTTGGTCATCCAG
AGGTCAATTTAATAGGCCTCTTAACGTTGCTATATGCTGGAACTACTTGAAAAATACTAG
ATAAGAGTTTTTGTTTTAAATACTCCAAGAAAAACACCAGATTAGTGTTTATTTTTATAG
TAAAAATGTTAAAACAATTAAGTATATCAGCAGGTAACCTTTTGAATAAGGGAACCTCAG
AGACTTTACGCAACGAAATCACAACAAAAAAAGTTTCTATTCATCTCCCTAAACACTTAA
AACCAGCTAATGATTCTCAATTTGGTCACTATTTAGCAGGTTTAATTGATGGTGATGGTC
ATTTTAGTAGTAAACAACAATTAATTATTGCTTTTCACTCTTTAGATATACAATTAGCTT
ATTATATTAAAAAACAAATAGGTTATGGTATTGTACGTAAAATTAAAGATAAAAATGCTA
TTCTTTTTATAATAGCTAACTCTAAAGGAATTGAAAGAGTAATAACTTTAATTAATAATA
AATTTAGAACTACTAGTAAATATAATCAGATTATTAATAATATATTTGCTCATCCTAGAT
TTAAAGAATTTAGTAAAACTATTACTTTAGGTTTAAATTCAAATAATAATTTAAATAATC
ATTGGCTAGCTGGATTCTCAGATGCTGATGCTAGTTTTCAGATTAAAATTTTAAATAGGG
ACAAAAAAATAGAAGTTCGATTGAACTATCAAATAGATCAAAAAAAAGAGTATCTTTTGA
GTTTAATTAAAGATAATTTAGGTGGTAATATAGGCTATCGAAAAAGTCAAGATACTTATT
ATTATGGTTCTACTAGTTTTGGTTCAGCTAAAAAAGTTATTAATTATTTTGATAATTATC
ATTTGCTATCTTCTAAATATATTAGCTATTTAAAATGAAGAAAAGCTTATCTTATTATTC
AAGAAAATAAACATTTAACAGAATCAGGACTTTCTCAAATAAAAAAACCTCATCCCTATC
GGAAGAATATTAATTAGATTTGTTGAGATTTAAAATAAAGTCCTAACAAGGGTATAAAGC
TTTTGAGTGTTAAAAAGAATAAATCACCTTTTGGGTGATTTTTTTTCATTAACCAAAATT
TATTGTTATATTTTAATTATGCCAGCTTTCGGTGTTGTTAGTCACATTATTCCTAGTTTA
GCTCATAAACCTATTTTCGGTAAAGAAGGTATGCTTTGGGCTATGTTAAGTATTGCTTTA
TTAGGATTAATGGTATGGTCTCATCACTTATTCACAGTTGGTTTAGATGTTGATACTAGA
GCTTATTTCAGTGCTGCAACTATGGTTATTGCAATTCCAACAGGTATTAAAATCTTCAGT
TGGTTAGCTACTTTAACAGGTGGTGCAATACAATGGTCAAGAGTACCTATGTTATATGCT
ATTGGTTTCTTAATCTTATTCACAATTGGTGGATTAACAGGTGTTATATTAAGTAATTCA
GTATTAGATATCGCTTTCCATGATACTTATTTCGTTGTAGCTCACTTCCATTACGTTCTG
TCAATGGGTGCATTATTTGGTCTTTGTGGTGCATACTATTGGAGTCCAAAAATGTTTGGA
TTAATGTACAATGAAACTCTAGCTTCAATCCAATTCTGGATTTTATTCATAGGTGTTAAT
ATTGTATTCGGTCCTCAACATTTCTTAGGATTAAATGGTATGCCTAGAAGAATACCAGAT
TATCCAGAGGCATTTGTGGGATGGAATTTTGTATCAAGTATTGGTTCAGTAATTTCTATT
CTTTCATTATTCCTATTTATGTATGTTATGTATGATCAATTTACATCAAATAGAGTGGTT
AAAACAAATCCTTATTTAATCCCTAGCTATTTTGATGATAATGTAATCTTCGTAAATGAA
AAATTAGGGGTAGCTCAATCAATAGAATGGTTACTACATTCACCAGTACACGAACACGCA
TTTAATACATTACCTACAAAAAGTATTTAATTTAAAATCTTAACCCCCCTTTTATTTTAT
AAACTTTATTCCAATTTAAAAATTGGAGAGGGAGATTGAAGGATAATTTAGCTATCCTAT
TCAAAATTGTATCTTTATAATTTTTTTATTCCTTATATGTGAGAGAACACTATTGAGATA
AACTAATTTAGCTTAAACATGAATCTTTCTACTAAATTTCAAGGACATCCTTATCATATT
GTAAGTGCGTCACCTTGGCCATTTTTCTTATCTGTAGTATTATTCTTTAACTGTTTAGCA
GCTACATTATATTTACATGGATACAAACATTCATCAGTATTCTTTGGAATCAGTTTCTTA
GGTTTATTAGCAACTATGTATTTATGGTTTAGAGATATGTCAACTGAAGCTAATATTCAT
GGTGCACATACAAAAGCAGTAACAAAAGGATTAAAAATAGGATTTATGTTATTCCTAATT
TCTGAAACTTTCTTATTTGCTTCTATTTTCTGGGCTTTCTTCCATAGTTCATTATCACCT
ACTTTTGAATTAGGTGCAGTATGGCCACCAGTAGGAATAGCAGATAAAACAATAGATCCA
TTAGAAGTCCCTCTATTAAATACAGTAATTTTATTAACTTCTGGTGCTAGTTTAACTTAT
GCTCATTATTCATTAATTGCTAGAAATAGAGAAAATGCTTTAAAAGGTTTATATATGACT
ATCGCTTTATCATTCTTATTCTTAGGAGGTCAAGCTTATGAATACTGGAATGCTCCATTC
ACTATTTCAGATTCTGTTTATGGTGCTAGTTTCTATTTTGCTACTGGTCTTCATGGTATT
CATATTATTGTTGGTACAATTCTACTTCTTGTTGCTACTTATAATATTTATACTTACCAC
TTAACTAATACTCATCATAATGGATTTGAATGTGGTATTTATTATTGGCATTTCTGTGAT
GTTGTTTGGTTATTCCTTTATTTAACTATTTATATTTGGGGTAGCTAAGGCTTACTTCAA
TTTTTCCCCCCTTTTTATATCTTATTTCTCTAAAATAGTCTGTATAGCTCAATGGTAGAG
CATCTCACTTCTAATGAGTCGATCTAAGTTCGATTCTTAGTACAGATTCCACACCTAGAA
GGTGTGTATTTTTTTTTTAGCTAATTTAACTCAATTGGTAGAGTGCGTACCTTGTAAGTA
CGAAGTTAGAGGTTCAATTCCTCTAATTAGCAATCCCTTTCCCATATTTTTGGTATAAGA
GGATCTCAGATAGTATCTAACCTATCTTATCTTTTATTATCCAATATCCTTTTAATAAGA
TTTGGATCTTTTTTCCCAATTCCTTCAAATTTTTGACTATTTATCGATAATGATTGTTCA
ATTTAGAAGGGATAATTTCAAATTTAATTTTTATGAAAATTTTAAAATCTAATCCTTTTT
TAGCTTTGGCTAATAATTATATGATTGATGCTCCTGAACCTTCAAATATTTCATACTTCT
GGAATTTTGGTTCTCTTTTAGCTTGTGTATTAGTTATTCAAATTGTAATCGGTATACTTT
TAGCTTGTTTTTATATTCCTAATATGGATTTAGCTTTCCTTTCAGTTGAAAGAATTGTTA
GAGATGTAAATTATGGTTTCTTATTAAGAGCTTTCCATGCAAATGGTGCTAGTTTCTTCT
TTATCTTCTTATACTTACACATAGGTAGAGGTTTATATTATGGTTCTTATAAATATCCAA
GAACAATGACATGGAATATTGGTGTTATTATCTTCTTATTAACTATTATTACTGCCTTTT
TAGGTTACTGTTTACCAGCTAATCAAATGTCATTCTGGGGTGCAACTGTTATTACTAATT
TATTATCAGCTGTTCCTTTCATTGGTGATGATTTAGTTCATCTATTATGGGGTGGATTTA
GTGTATCTAATCCTACTTTAAATAGATTCTTCTCACTTCACTATTTAATGCCTTTTGTTA
TTGCTGCTTTATCAGTAATGCATTTAATTGCTCTACATACTAATGGTTCATCAAATCCAT
TAGGTGTAACAGCTAATATGGACAGAATCCCAATGAACCCGTATTATCTGATAAAATTGC
GCCGTTGTGGTATATATGTGTACCCTCATAGAGAAAGGGATATCTTGTGTGTAAAGATAT
GAACAATACACTTAGGTAGCTGGGGAAACCCAATGCCGAACAGAGCATGTGTACAGAAGG
TCCTTCCTGTAACGAAACAGATAAGTTCAGATGGATCAGTTCAAATAGATACGGTTAGAG
CTGTATTGCCCGAATTCCAATTCCCATCTCACCCTCAGATAGGTGATTGTCTTAGCTGAA
TAGAGACATTCTTCTCTAGATCTTTGGTTGGCTTTTATGACCAAGGATACACACCAGGAG
AAGAGAGTTGTACCAATAGTACAATTAAGGGAATGAGTGGAAAACCTACGTCTATCATCT
CAAACATATATACAACTACGGGTCCCGCTAAGGTCAGTAATGACTATGCGGTCAGAGATC
CTGGAGTAGCTGTTGATCATTTTGATCAATACGGTCCTTTGAAAGAGGGAAGAAGTTTGA
ACTCTGCAAAGATTTCAACACAGTGAAGTGGATCAGCTACATTAAAGTCTTCCAATAGAT
CAATATTTAATATTGGTTTAGGATACATTAATACTTTTTTAGGGGTATCTAATGTAAGAG
GATTTAGTACAGGATCAGGACGATCAAAAAATGTACTAAATAAACTAGACGATTTATCTA
AACGATCAAAAAATTATCCTAATCTTGTAATTGATAGAAATCTCTACAAAGATTTCCTAT
TAAATCGAGATATGTTCCTTATTGCTTATAATAAATTAAAATCTAATCCTGGTATGATGA
CTCATGGTCTTAAACCGGATACTTTAGATGGAATGTCTATAGATGTTATTGATAAAATTA
TCCAAAGCCTTAAATCTGAAGAATTTAACTTCACTCCTGGTAGACGTATCTTAATTGATA
AAGCCAGTGGTGGAAAAAGACCATTAACAATTGGTAGTCCTCGAGACAAATTAGTTCAAG
AAATTCTTAGAATAGTCCTTGAGGCTATCTATGAACCATTATTTAATACTGCTTCTCATG
GATTTAGACCAGGTCGAAGTTGTCATTCTGCTCTTAGATCTATTTTCACTAATTTTAAAG
GTTGTACTTGGTGGATTGAAGGAGATATTAAAGCTTGTTTTGATTCTATCCCTCATGATA
AATTAATTGCTCTATTATCTTCTAAAATTAAAGATCAACGATTTATTCAATTAATTCGTA
AAGCTTTAAATGCTGGATATCTAACTGAAAATAGATATAAATACGATATTGTTGGAACTC
CTCAAGGTTCTATAGTTAGTCCTATCTTAGCAAATATCTACCTTCATCAATTGGATGAAT
TTATTGAAAACCTAAAATCAGAATTTGATTACAAAGGTCCAATAGCTCGTAAAAGAACTT
CTGAATCTAGACATCTTCATTATCTAATGGCAAAAGCCAAAAGAGAAAATGCTGATTCAA
AAACAATTAGAAAAATAGCGATTGAAATGCGTAATGTTCCTAATAAGATACATGGTATTC
AATCTAATAAACTAATGTATGTTCGATACGCTGATGATTGGATAGTTGCAGTTAATGGAA
GTTATACTCAAACTAAAGAGATTTTAGCTAAAATTACCTGTTTCTGTTCATCAATTGGAC
TAACAGTATCTCCAACTAAGACTAAAATAACTAATTCATATACGGATAAAATACTTTTCC
TTGGTACTAATATTAGCCATTCTAAAAATGTTACCTTTAGTAGACATTTTGGTATACTTC
AAAGAAATTCTGGGTTTATTTTACTTTCTGCTCCTATGGATCGAATTGCAAAAAAACTTA
GAGAAACTGGACTTATGCTTAATCATAAAGGTAGATCTGTTATTAGATGGTTACCTCTTG
ATGTACGACAAATTATTGGTTTAGCGAATTCTATTATTAGAGGTTACGATAATTATTATT
CTTTTGTTCATAATAGAGGAAGATTTGCTACTTACGTTTACTTCATAATTAAAGACTGTG
TTCTTCGAACATTAGCTCATAAATTATCATTAGGTACTAGAATGAAAGTAATTAAAAAAT
TTGGTCCTGACCTTTCTATCTATGATTACAACTCTAGAGATGAAAATAATAAACCAAAAT
TAATTACCCAATTATTTAAACCTTCTTGGAAAGTTAATGTTTGGGGATTTAAATCTGACA
AAGTTAAATTGAACATTAGAACACTTTATGCTTCTCACTTATCAATGGCTAACTTAGAAA
ATCTACAGTGTGCTGCTTGTCAAAGTACTTATAAAGTGGAAATGCATCATGTTAGACAGA
TGAAAAATCTTAAACCAATCAAAGGTACTTTAGATTACTTAATGGCAAAAGCAAACAGAA
AACAAATTCCATTATGTAGATCTTGTCACATGAAACTTCATGCTAATAAGTTAACTCTTA
ATGAGGATAAAAAAGTTTAGATATCTTAAATGTAGTGGAGAGCCGTATAATTACGAAAGT
ATCCCGTACGGTTCGGTGACGAGCCGTGTCAACCCTGCAAAGGGAATGCGTCTTAGTTCA
ATGATTTGATAACAATATTTATCTTCTTAATCGGTATAAATTATATGGCATTCTATAATC
CATATGGATTTATGGAACCAGATTGTGCTTTACCAGCGGATCCTCTAAAAACTCCAATGT
CTATTGTTCCAGAATGGTATTTATTACCTTTCTATGCTATTTTAAGAGCTATACCTAACT
TCCAATTAGGAGTTATAGCAATGTTATTATCAATCTTAGTATTACTATTATTACCATTAT
TAGATTTCTCAGCTATTAGAGGTAATAGTTTTAACCCATTTGGTAAATTCTTCTTCTGGA
CATTTGTTGCCGATTTTGTAATTCTTGCATGGATTGGTGGATCACATCCAGAAAACGTCT
TTATCACAATCGGTGCTATTGCTACAATCTTCTATTTTAGCTACTTCTTTATTTTAATAC
CAGTATATACTATATTAGGTAATACATTAATTGATTTAAATTTAAGCTCAATTAAACGAT
AATCTCTTCCCCCTTTACACTATATAAAAATATCTTATTTAAACAGTATAATATTTAATA
AAAAGCTCATCAAAAGGTATGAATAAAAGTTTTTTACATAGATTAGGTAATAAAACATTC
TTTGGGTGTTAGTAGTGATTAGAAGAAGTTGATCTTTTAGGGATTTATTTTTATCAGAAT
TTTTACGGTCAATTTTTATCTAATTAAATGTGAATAAGTTTGCGATTTAATGTAATTGGT
TAACATCTCTGACTCATGATCAGTGTATTAAGGTTCAAGTCCTTAGGTCGCACTTTATGC
TCTGATAACTTAACGGTTAAAGTGCAGTATTGAAGCTGCTGAGATATTGGTTCGATTCCA
TTTCAGAGCAAATAAAAGAATCTGTAGCTTAAAGTAAAGTATCGCCTTGTCACGGTGATG
GATGCCCACTCGTACTGGGTCAGATTCGTTTAAGCAGATATAAGTCAATTGGCAGACCTT
CTGATTTCCACTTAGATTATGTTCGTTCGAATCGGACTATCTGCATTAAATAAGCCTAAA
TGCTGGAATTTGGTAGACAGAACAAACTTAAGATTTGTCGCTTTCGAGCGTGTTGGTTCG
AGTCCAACTTTAGGTATAACTAAAAAAAAAAAAGAGTATAGTTTAATTGGTAAAACTTCT
GATTCCAAATTAGACATTGTTCGTTCAAGTCGGACTGCTCTTGATTTTTTATTCTTTGAT
CTGTTAGGGAAGTATGCAGATGTGATGAAATTGGTAAACATGTTTACCTTAGGAGTAAAA
TCTTGAAGGTTCGAATCCTTCCATCTGTAGGATAAAAAATCTCTAAAAGATTTTTCTTAG
TTAAAATCTTAATTGATTACTAAAAATACTCTACAAAATTTTTATATTTTTTTAAATGTT
TATTACAAGTCCTTTAGAACAATTCGAATTAAATAATTATTTCGGTTTCTATCTTTTTAA
TTACCATTTTGATTTCTCTAATTTTGGTTTCTATTTAGGTTTAAGTGCATTAATTGCTAT
TTCATTAGCAATAATAAATTTAACACCATATGGATCAGGAGCTAAAATAGTACCTCAAAA
ATTTGGTATAGCAATGGAAGCTATTTATTTTACTATGTTAAATTTAGTTGAAAATCAAAT
TCATAGTTCAAAAACTGTATCAGGACAAAGCTATTTCCCATTCATTTGGAGTTTATTTGT
TTTAATCTTATTTTCTAATTTACTTAGGTTAATTCCTTATGGTTATGCTACTACTGCTCA
ATTAATCTTTACTTTAGGTTTAAGTATTTCTATTTTAATTGGTGCTACTATTTTAGGATT
ACAACAACATAAAGCTAAAGTCTTTGGATTATTCTTACCTTCTGGTACTCCTACTCCTTT
AATTCCTCTTTTAGTTTTAATTGAATTCGTTTCTTATATTGCTAGAGGTTTAAGTTTAGG
TATTCGATTAGGTGCTAATATTATAGCAGGTCATTTAACAATGTCAATTTTAGGAGGTTT
AATCTTTACTTTCATGGGATTAAATCTTATTACTTTTATTATTGGTTTCTTACCTATTAC
AGTTTTAGTCGCTATCTCTTTATTAGAATTTGGTATTGCTTTTATTCAAGCTTATGTATT
CGCTATTTTAACTTGTGGATTCATTAATGATAGTTTAAACCTTCACTAATTTTCTCCCCC
TATTTTTATGGTGATTGTAATTCAATGGTAGAATGCTTATTTGTGGCATAAGAAGTTCTT
GGTTCGATTCCAAGTAATCACCCAATCAAAATTATATAACTCTCTTTAAAAAGTGTTTAA
CGGATAGAAACATGTATTGGTTCATGTACTTGCTTTGGGTGTGAGAATTTGTTAGTTCGA
ATCTAACCTATCCGATAATAAGTGATTGGGTTGTTGACTAATAGGTAAGTCCCTGAAATT
TGACTTCAGTCTATGTAAGTTCGAATCTTACCATCCCATTACTTAAACATCTTTAAGATG
TTCCTAAACCATCCAAAAAAAAAACACTTTATTAGTGGGATGGTCTCTTTTTTATTTAAG
TATTTCCAAAATCAATTAGGAACCAATTAGGGTTTCTTAAATTTCTAATCAAAATGCAAA
AAAATAATTTAAAAAATTTAATTACTACTATTGTAACTAATGCTTTTTTTAATCAAAAAG
CTAATTTTTCAATACCTCTTAAAGGTGTTATTGGAGAAAAAAGACCATCAATCTTAATAG
GAAATATTAATATAAATTTTAAAAGTGATTCTTTAATTGAAGTATCTTTCCCTTATTATC
CTTTACTTAATAAAAATTATCCAAATCCTTCAATTATAAGTAATATTATACAAAAAGCTC
TTTCAAATCATCTTTTATATTCATCTAAAAATTACTCTTTTATTGTTAATATTAGAGCTC
TTCCTATTTCAACTCCTTATGGAAGTAGTTTAATCTTTTCAAAATATATAGCAATAATAA
TAGGATCAAATCCAAAAATAGCTTCTACATTATGGATAGATCCTAAACGATTTATTAATT
TACCCAAATTACAAAGTGATTCTATATTTAAAATTTTAGGATTAAATGTACCAAAAGGAT
GGAAAGGTATTCATATCTCATTAAATTTAATTAAATGAAATAGTCTATCATCAAGAGGAC
GAATAACTAATATAATTAAAGGTAGTGTACCATTAACAAATAATTCTAATGGATATGATG
AAAGTTCTTTAGCTATTTATTCTAAAATGGGTACTATTCAAATTAAGGTTAGATTGTCTT
ATTCTTCAAATCTTTAATTGTTTCCCCCTTCAATCATTTAAAGTTCTTTAACTTAAAAGG
TCAGAGTGCAGACTTGATAAGTCTGTGGTATTGGTTCGATTCCAATAAGAACTAGCCAAA
TAAATTAATCCATTACAATATAATTAATACCCTTTAAAAGTTGTATGGAATTTTTCAATG
AAGTAAAATAACTCCCAAATCTTTATTTTTCTTTAAACCTTTAGTAACTATCAATTTAAA
AGTGAAAAAGATAAAAAATAAAGAAACCCTATAGGGTTACTCAAATCATTAATATGCCAC
AATTAGTACCATTCTATTTTATTAATATTTTATCTTTTGGTTTTTTAATCTTTACTGTTT
TATTATATATTTCATCAGTATATGTATTACCAAGATATAATGAATTATTTATCTCAAGAT
CTATTATAAGTTCTTTATAATTTAACCCCTCCAAAAGTATTGATAATGTTCAGTGGTCTG
AAATTGAATTTGCAAAATTTGATATATGAGTTCAATTCTCATCATTATCTTTTACCATAT
TTATTAGGAGAATAGCTTAATTGGTAGAGCACTTACCTTACAAGTAAGATTATAAGGGTT
CAAATCCCTTTTCTCCTATTTCATCTCTAAAAAAAAGGGGAGAATTCTTATGTTGGTTTT
AAGAGGTGAGTTGTAGCCTCATTAGGTCAATCCTATCGCAGGTTCGATTCCTGCTCTCCT
CATTACTCAAAAGGGAGTAAAATCCCCTCTCTCATCTTTTTTAGTTTTAATTAATAATAA
AATGGCATCCATAACTAATTTAGTATTGTAAAAGGGAAAATATTTTCTTAATATTTATTG
CACTTTTAGCTTAATTGGTTAGAGTAACAATCTTCGAAATTGTTAGTATAGGTTCAAATC
CTATAAAGTGTTAATGAGGTAAGGATTATAGCTTAACGGTTAAAGCAGAGAGCTCATAAC
TCTTGTATATTGGTTCGATTCCAGTTTGTCCTAATTTATTTTTCCTCTTTAATTGGAAGG
GTGTCCGAGTGGTTTAAGGAGCGATATTTGAGCTATTGTGATTTATTCATCGCAGGTTCG
AATCCTGCCCCTTTCGAAAGTCTACAGATAAAAAAAATCACATTTCTTTTTGTTAGAATA
GTAAACTCTAGCTGTAGAGAGTTAAATTCATCTAAATTTTAAAATATGATACAAGCTGCA
AAATACATTGGTGCTGGTTTAGCTACAATTGGTGTTAGTGGTGCTGGTGTTGGTATTGGA
TTAATCTTCAGTAACTTAATCTCAGGTACTTCAAGAAACCCATCAGTTCGACCTCACTTA
TTCTCAATGGCTATCCTAGGATTCGCCTTAACAGAAGCTACAGGTTTATTCTGTTTAATG
TTAGCGTTCTTAATTATCTACGCTGCTTAATTTCCCCCTTTAAAAAAGAGAATACTGGGG
ATTTAATTTAATTGGTTAGAATATTGTGTTTGCACCACAAAAATCTGGTTTCGAGTACCA
GAATCTCCATTTTCCCCCTCCAAAACATTTTATTTGAATGTTTTTAAACTAGAATCTGTT
TGAAGAGAATTTGAATAATTCTTTGGAAAGTTTGGATCACTCATAACATTAGAATAGTAT
TTGTTTAAAGTGGTTAATAAAAAAGAAACCCAAGAGGGTAAGTCTACTAATATTAAAGAA
AGAAGAATTCAGAATTAAATTCTGAAAGTGTTAAAATAGTAGTTCATTTTTAATTTTTAG
TAATTTCAAATATAACAGAATCCATCTTATAAGATTCCTAGTTGGCTCTATTGTCTAATG
GTTAAGACCTTACATCTTCATTGTAAATATCTTGGTTCGATTCCAAGTAGGGCTACTTAA
ATAATAATTTTGAAACTATTACTTTTCGGATATTATCTTATTTGTTCTCAATTTATTATT
ATTAACTCAATGTGCTCTCTATGTTATTTTTTAACTCTATATTAAATGATGCCCCTTCTA
GCTGGGCTCTTTATTTCCAAGATGGTGCATCTCCTAGTTATTTAGGTGTAACACACTTAA
ATGATTATCTTATGTTCTATCTAACTTTCATCTTTATCGGTGTAATCTATGCTATCTGTA
AAGCTGTTATAGAATATAATTACAATAGCCATCCTATTGCTGCAAAATATACAACTCATG
GTTCAATTGTTGAATTCATTTGGACTTTAATTCCAGCTTTAATCTTAATTTTAGTTGCTT
TACCATCATTCAAACTTTTATACTTATTAGATGAAGTACAAAAACCAAGTATGACTGTTA
AGGCAATTGGAAGACAATGGTTCTGGAGTTATGAATTAAACGATTTTGTTACTAATGAAA
ATGAACCAGTTTCATTTGATAGTTATATGGTACCAGAAGAAGATTTAGAAGAAGGTAGTC
TAAGACAATTAGAAGTAGATAATCGATTAGTTCTACCTATAGATACACGAATAAGATTAA
TCTTAACAAGTGGTGATGTTATCCATAGTTGGGCTGTTCCTTCTTTAGGTATAAAATGTG
ATTGTATCCCTAGTAGATTAAATCAAGTTTCTTTATCTATTGATAGAGAAGGTTTATTCT
ACGGACAATGTAGTGAACTTTGTGGTGTACTTCATTCATCTATGCCTATTGTTGTTCAAG
GTGTATCTCTTGAAGATTTCTTAGCTTGGTTAGAAGAAAATTCATAACCTCCCCCCTAAA
GTGTTTATTAAATGATGAACTCAAATAGAGAATAATCAAGTTAAATAATAGTAAGATAAG
TACTAAATTAGATTTTATAAAATTCCAAAGTATAAATATTTTTATATATGT
>AB325691 dna:chromosome chromosome:ASM294v2:AB325691:1:20000:1
CAATTGTAAACCATATTGGTATAATAACATGATATTGTTAAAAGAAAAGTTGAAGTATGC
AGCTAGCAGCAGAATTTTGAAAAGCTAGATAGTACAGTAGATGGTTTCAATTCTTGCTAT
GTTAATAAATTACACATAAAATTCACGGGTATAATATTAATCTACAAAGAGCGTAAACTT
TTGTTACAGTTGTAATCATTAAGGTGATATGCTCATCATGGTTTAGGAATTTAAAGAATT
CTTCCTTCGAGTTTGTAAATACATACAAATGCTTTTATATGAGAATTCACTTTTTTTTTA
ACATCTAAAACAGTGGTATTTAGATATTCTACATTAGTAAGCGAAAGTCAATTATATCTC
ATCTAGATCCTTTGCTGAAATACACTGCGGTAATTTAAGTAATGATTGCCGGTTATTTGG
ATTATTTCATATACATGGTTACTCAATTACATTTGGGTACAATTTTTCTTTTCTAAAAGT
TAGCTAGCAAATTCACTCAAAAGATCGTAGATTTTCCGTATCTTAGGTTGTTTCTGCGAA
ACCTAGGAAATGCGGCAATGAGTAAGAAATTTAAATTTGTTAACAAGTAAATTTTGTCAC
ATAAAAGACAGCGCCAATCAGAGTTTGGGATCCGACCCCTCAATATGAGTCAAATAAAAT
GGCATGGAATAAGCTCTACAGCAGTAATCGAAGGGTAAGTGGTTTGATTGTCCACAATTT
CGCAGTTCATAGAGATTAGTTTTCAAATCTACTCCTGAATAATAATAGCTGTGAACTTAT
TATAGAAGTTCGAAAGGTGGTTAATATTCCGACTTGAGAACGGTGACTACATTCTTTCGA
GTTTTCACAATTAAGAGTCTAACACATTCTTTTAGGACGAACAGTGATATCCAGGAAACC
ATATAGTCCTTTCTAAAATACAGCATAGTACACACACCTTTTGTTTACGACCATCGGCAT
GGAAAAATGCCTTTTGAAGAAGTGTATTGGAGGGGAGCTGGGTAGAAAATTTGCCTTGTT
GGACCGATTAATTGAAAGAAATTTGAATACCTCTGGACCGAATAGGTGATAGTTATTTAC
TATTGACAACTTATAAGATATCCGTATTGTTACTTGATTTGTAATTTAGCGTTCAAACTC
TGACAAGGAAAATGGTCAATGTAGGAATTGTACTTTCACAAACCGTGCTTTTCATTAGTA
ATAATTTAGGATTGATAAATAAGTACGTTTTCTTAGTATACGTACGACATCTTAGGTTTT
TTTTATTTTGTTATTACAATTACAGTGCTTGCTAAACAAACTCAACTAGATGGTCAGAAA
GTTTTTCGGGAAGATATCGTAAGTATATCAAGTTTGTTGAGACACGTGTAAACGGCAAAC
AAAATCTCGAAAAGGGAGTAAATAACTAAATAAAGATCGTAACAAGATAATTTGAACAAA
AAAAAACAAATTTAGTGATAATAAAAAGGGATATTTGTTCAGCAGAACGCACCATAAATT
TTCTTTAAAACATGTTTAAATCCACTAGATGTCTCATCTTCTTCGTCAGAATTTTCATAA
GTTCGTAGGCCAGTTGAAATATCCAGTTTATCCAAAGACGGGACGTGTGATCTATCATAT
ATTTTATAACCGACAAAGAAAACAATAGCAACACAGGCGGCTAAATAACCTTGAAAAAAA
TCATTCGCGTTTGGTTTTCCACCAATAGGAAACAGGGATACATAAAACTGTGCCATTAGG
CATAAGATATTAAAAAACAAACCAATGCAAGAACCCCAAATTCCCATCGGAGATACGAAG
CCTAAATCCCGTAAAGAACGCCCCTGTCTTTTGTATGCTAGACGAAAAATAATATGAGAT
AGACATATACTACCCCACGAAAAAAAATTGGATAATCCTGCAAGAGCAAGAAGCCAATCA
AATACCGTGTCACTAACATCGTTGCCGTTTTTGTCAGCTTCATTAATGTAGGCAAAAAAC
CCAAATAAAAGTACTACAACCATAGCAATTAAAGGACGACCAAGGCGATCTGTGTACTTG
AAGAATTTAGGTGCGTGCCCCAAACCAGCCATACCGTGAAGGGTACGAGCGGCTGCGTAA
GTGCTAGAATTAGTTACGGAAACGACAGATATAATAATTACAGCATTAAAAACGGAAGGC
AATCCTTTAATGTTTGCTTCTTGAATGGCTAGTACGAAAGGAGAGACACTGGTTGATCCA
TTGCCCATCAAGTTAGGATCATCAGGACTAATTAATAGCCCTATCAATGTCAAAGAAACA
ATGTAGAATACAGCAATACGCCAAAACACTTGTTTCACAGCATGAGGGAGTGATTTTTGC
GGGTTATCAACTTCCGCGGCAGCTAATCCAATGAATTCCGTACCTGAAAAAGAAAATGCA
GCGGTAGTAAAAACCGAACAGAATCCTTTAAATCCATGTCTAAATGGATCTTTCTTAATA
ATACTGCCACCAATATATCCACGATGATCCGTGGGAACACCACCGCAGTTAATGATGATG
GCCAGGATGATGAATCCGAGAGTTGCTATAACTTTCAATGTACTTAATATAAACTCAACC
TCTCCATATGCTCGAACACCAAAAAGATTAATGATAATAACGATAACCAAAAAAATAGAA
ATCCAAGCAGCGCTATTAATGTCCGTCCAAAACCTAAACGTAATGGCACAAGTCGTTAAT
TCAAGGGGAAATGTTATAAAGTAGTTGATAAAGTAATTCCAACTAATCGTGAATCCCCAT
GCAGGATCGATAAAGCGCGTGGCAATGGTATTAAAACCGCCAGCAACCGGATAAGCAACA
GACAGCTCACCAAGTGCATAAACAACAAAAAACATCATAATTCCGATTAACGTATAGTTA
ATAATAATAGATGCTGGGCCACCATCTGAAAGTGAACTGCCTGAACCAACGTAAAGACCA
CTGCCGATAGCCCCCCCAATTGCGATCATTTGCATATGTCGAGCTTTTAAGCTTCGTTTC
AGTGCTGAGCCATCTTCGTCGGTGGATATAGCTGGTTTAAAATCGTCAAAAAATTTTGTT
ATGAAACTCTTACGCTCCGGCTGCACATCGTCTACTACGCCCTCAACATAACCTTTTTCA
ACTATAGAGGGGTTTAAGTCATCCTTCTTGTCAATATCCTTATAATCGGGGCTTAACTCA
AAGTTGTTGTGTGACATTTCTGCGTTTAGATAAGTACCAAGAAGTAAAGATAGGGCAACC
GACACAGATAAGCCAACACGAGCTGTAAGTTAGGAATTAAGATTGGCAAAATCAATCTAA
TTTCTTCAAAAAGAAGGGATCTACTCGCTAAAATAACTATTGGAAATACGAATGGTGATC
CAATGTAGGCCCAATAGTAGTTTTATCAAAAATTAACGGCACACAATAAGTCTATGATTT
TTTTAAAACAGAGAACAGAAATAAAAATGTAAAAGAAAGAGAGAAACCACGTTCAAAGAA
AGAAATATCTTGAAGTGGAATACAACGGAAAATGTAATGGTTTTAGTGAAATTTGAAAAG
AAACAATGATATATTGACAACTTGTTACTTAACGGCTGCATTCTCGGTAACCTGATTAGC
TGGCCCGCTTTAGGTACCACAAGTTATAATAATACACTATATATAAGTCATCTACTAATT
ATGGGAATCCAGTTACCGAATATTTCAAAGATTCAACACCAATATGTTATTCGATGTTAC
TGAACAAAAATGTTTTATCGGCACCATTTAACTCAGTAGGGAATCGTTCCTATTAAAAAC
GATAAACTAAAATACATTAGGGCTATTGTTTCAAAGCTCTGAGTAATATGTTGGGAAAGA
GTTGCAGCTGACACATAGTTCAATAACCTTTGTAAAAGTCCTTATTTATTATTGCGGTGG
AAATAATACTCTTAGACCATGTAATTTTTTGCGGAAACAGCTTCAATGGCATACTCTAAA
GCAATTGTTTTTTCTTTTCTACTCATTCATCTTTAAAAGAAGTAAGGTCCAAGTAATCTA
AAAAACTTTTGCTAAGGGGTATTATATTTGGCAATTTTTCGTTCTTTACATATAACGTAG
CTTTCTGAGGAATTTCGACACTGGTTACTTAATGCGCTTTACAAAGTTGGCTCGAGAGAT
TCTGGAGATATAGGAGTTATTTATTGTTTATAATATTCCTTCTATTTTACCTACATGGTT
TTCACAAAATCTTTATAAACTGTTTTATCCTCGAAGGAATTTTCAGAATTTATATATTTT
TGATAGCAAACTATGATGGGATGGTTTTTAAGCATTTTTTTTTTTTGTTTTTCTCTTTTT
CATTTTAAATTTTGGTTACCCTGGTTTGTTTGAATTACATATCTTTCGTCAATTATACGC
TTCTCTGTAATGTTTTGCTTCATGAAGAGAGCTGTTTTAACTCAAACGAACATTGAAGGG
ATCAAAGGGAAACAAAGTGTTCATAAAATTTATTTTTTTCTTTTTTTAAATTTTCAATTA
TAAGTTCCTTTGGAATTTGTAGCGTTACATGTTTGTCGTGTAGGTCTTACTTGAAATGAA
TTTAGGAGGAAAGGGGTTGATTGTCCTTTTACTTCAAGAAAATTAATTACCTACATAATT
GGATTATTTAAGGATTTTTTTAAAGTTTACCAATGAAATAGAAGGCTCATGAAGCCTATT
AAGACTCAATGATAATCTATAGATTTATCCATTTAAAGCGTATAAATAATTGTGAAGATG
AAATTATAAAAACGACAGTAAAATCAAATACCAAAGTCGGGAAATGGCAAACAAAGAAAG
AATTTAAATACGTGGTTGTGTAATATTGAAAAGAGAAATCAACAAAGTAAAATAGTTGAG
CGATTTCCTAAAGAACTTTAAGCCTAAATGAAGAAAAAAGTGAGAATATTGCGTTAATCG
AATAGTCGAGAGTATAACTTTATGAAAGTAACAACTGTTTGAATTTGTCTACTAGTATCT
TTTAATTTGTAGCTCTATGATTGAGGATATGTTTGATAATTAACTCAATAATATATAAAA
GTGTATGTGGCAATAAAGTTCTTAATTTTCATCAAAAATTAAAGCGATGTCCTTTTCTTC
AGCCTTTTGTCGACACACTAAATGATTGTAAAAATTTTAAATAATTGAATAGTACACGCC
AACATGGGAAAGCATTTTTAGAGTCAACGATCTAGCACAGTGCTTTTTTGTTTTTTTTTT
GGTTGATAAGCATGTAGTAAATATAGCTAACATGAAATAAAGTTAAATTTCATCTTGTGA
ATGTTATTTTAAATCTATCAATATCAGAAGAAATTGGATCGAAATACGACCTGTTACCAA
CTTAAAAATCTCAAATTCCTAAACGCTGAACACCTAAAACATCATAAGTAGCGAAGCAGT
ATGGTAAACACCGCAATTATCCCAAATCGCCAAGTCAAGTTTTTTCCCCATTTGAGGCGA
ACTTGTGAATCAAAGTTGTAAGCAATTGATTATGCAAATTTTTTCAATAAATATATAATT
TTTTTAGCCGCTAAATCGTTGATCTTCCCAACGTGATATCCGACTGCAAACACGCTCTTC
AGTCCTGTTGCAGGTATGGAACGGATTATCGGATGGACTGCGTTTAGTTATTCACTGACA
TAATTTGTGCAATCTACGAGAACCACTGTAAATAATAAAGCTACCTGCGTTTACGTATTG
AATTTCCGTTGTGAGTAGGTAGCAGCGAGTCCATCTAAAATCGACGAAATAGGGATAAAA
CCTTGTGAAGAGTTCATAGCCCGATTTTCATAATGTATCGCATCAATTTTTTGAAGGGTT
CTGCAACTTTAAGGTAGGACGGTCAGCAGGTACACTAGGCTTTCCGTCAATTCTTTAAGT
TTTTGAACTAGTGTTATTTGCTCCTGGGTATACAAATCTTAATTTCGAAAGAAGAAAACC
TCCTAATTGAAATTACTATGGCAATTCCCTGAACATGTTATCAACAGCACTTTCATTGAT
CCACGCGGAGTTGTATATTCGGCGACCGATACTCGTAGTTGAATCCGGGAATTCTTTTCT
TATTAACGAATTTTTCGGCACAAAATGATTTTTTTTTTTTTTTCTTTTCAACAAGTTAGA
AACGTCGTTTTTTTGAATATTGGATTCTACGACTCCTGTACCGACGATAGTTGAATCTTG
TTTTGTAGGCTTGGTTTCAACGGCGAATGCCAACATTTTAAATTCAGATTCAGTCAGTAA
AATTATTAAGCTAAAAAAAATATAATACAATTTTCCTTTTTTTACCAAGGTTTATGTCTG
CATATATATATATATATATATATTATTCACTCGATAAAGACAACATATTATATAATATAA
ATGATGACTGACTATATTTCCGGATTCTAGCGAACAATATGTTAGTCATTTATAAATATT
AGGAAAGATCACTACTCTAATTATAAATATTTGGTCTTATGTTAAACAATTCTTATTTAT
GCATATTAATTTGATAACTAGCAATTGCTCAGAATTAAATCAAAAAACGCAACTTCTTAT
CAAATTAACGATTTATTAGTAAAATCAACAATTAATACATATATTTAATAAATTTTAATA
GACAGCGTATCCAAAAAATACAAATTGCCATTGAGAGGCTTCCTTTCTCCATAAATTATC
CCAAAAAACTTATGAATGATTGCTAATTAAACAAATCGGAAAATCTATTTTTGGGATAAT
GAAAGGATAAAACAATTGTCCCAGTTAATAAAATTACTCTCCTAATTCTGTCGGCGCTCC
ACATACTCCTTGTTCATTAACATATTGCGCTTGTTACAAGACTTAAGGCAACTGGAATGA
AATGCTTTGAATATTGCCTGATTATTTATTGAATGATTGGATGAAGAAATCTGAGATTGT
TGCCTTGGTTTTATCAAATCTATGCTTATAATATGGCGAAAAAGGAAAGAAAGATAAATA
CATTAGTTGTTAATCAGTTCGCTTGATTTCTTATTCGAAAATAAAAAAGTGTTTAGCAGC
GATGCATTTACATATCTCAAAGCAATTTTTTTTTAGAGCTCGCTTTTTCTAATAATTATT
GTAGCATAACTGTTAAACTATTTTTTCCTTTACACTCACTAAATTTAATAAAGCTGGTTA
TACCCAGTTCAATTGATGTCACTTGTTCACAGTAATGTACGTTCACTATGATTCCATTCA
ACTTGTGCGACTATTGTCAGCGAAAAGGTAAAACGAATTTGAGCTATTTTTGACGTTCTA
TTACGTTAAATGTATTGATCAAGACTGTACATTTATTCAATATAATATTCTTGACCCTGC
TTAGCAAAAGAGACAGAATTCGAATTATTGCGTGAAGCTTAATTATTACAATAAAATGAC
TCTCAGGGAATATACACACTAGATATTAAAATTTTTATTTACATTCTAAATCATTTTTAT
TTCCTAAGCATTCATTTGATATCAATTCTTTGGCAATTTGTGAAATTAACTGTGCCTATA
AGTTGCAAAAAATACTTAACTCAAATCAAGTTTAAGTCAGTATTCATAGTCCCCCAAGAT
TGACTGAGTATGTTAGCAAACAGAGTAAATAATACTTCATATAATATTTTTAGCTCTTAA
AAATAATTAATTTCAACTAAATAGTTAAATGGGCTGCTAGACAAATGCACGTTGTAAATT
GTTAACAGACCTAAGATATAAAAGTTGACAACTTCAAATGTATGTCAGTTTTAATTAAAA
AATGTGTTTTTATTAATTCCAGAAAATAATTGATAGATAATTTAACTGATAAAACTTTTT
CAATTTTTTATGAATACTGGTCATTTAAATTACTCCGCAAGTATGTGATCATAATGAGCT
GTAAGATAATGAACGGCACAATAGAGCTTTGAACGGATCTTGAGTATCATCAACTAGCAG
ATGATAATACTCTTAATGCCTTAAACGATACAGTGAGAATTTGTTAGAAAGGGGGGAATA
GGAAAGATTATCAAATTCAGTATGTTGTATGTGATAGAGTTGCCCAATTGAGTTTGGTCA
AGTTTGTTGTGTAACGATTTCTAACGGCAGATACGCGGAATGGAGTGATTACTCTTATGC
TTAATAAAAAGGGAACCTGGATAATAAATAAACAGCCTCCTGTCCATCAAATTTATTCTC
GTTCCCAGTAAGGCATGTACGATTAACTATTGCCAGACATATTTCCTATAGTAGTCGAAT
GCTCAAAGGGGTTTTACGGACTTAGTTTAATTAGGCCTTAATTTGCATTATTCGATTAAC
ATCCAAATTTAATATGGTTAAGAGTCTCTACTAACTTACTCTAGTGGACCCAAAAATTAT
GAATATCCTCTCAAATCGAAAACTTGGCGTTCAACCTGTGATGAAGGAACTCTACTAAAG
ATTTTAATCGGGCGGATTTTAAAAATGGTTTTCGCGACTCATTGAGTTTAGAAAGTTCGA
AGACGTTTTAAAGGTAGGTGACCATTATCTAACTAACGAAGAGCGTCTTAAAAGTCAAAC
CACAAAATCTTAAACTTGAAAAAAAAAAAAAAAAAAAAAAAAAAGGGAATTGGTTTATAA
AAGCCAATTTTTTCCGCCATTCATTGAAAGACTTATTTTGTAAATTTCAGAGTTTTAAAG
TATAAATGTATAGCATCTTATAGTAATCATATTTGCCCCTAAATTTTTTGAATTATCTGG
TATAACCATTCATAGGTTATTGAAAAAACGAGGAAGTTATATTTCAATAGCTTCCCTTTA
TTTTTACAGCCTTTTTTCTCAAATTACGCGTTTGTGAGAGAACATTTTATTAGAGTTATA
TAAAACAGTAGCTGGAGCATAAACCCTCAATCTCTTTAATTATTAGGAACAGTAACAGTC
AAAGGCAACTCCAAAGGATAATACGCTTCGAGTTTTGCTTGATGAAACATAGTTACATAA
TATCTAGTTAAATGAGGAAGCTCCTTGCGTGTCTTCTCATCAATAATGGAGTGGAAGAAT
CTACGAAGCATACTTCCAAAAAACAAATCGGCGAGGGTAAAGCGATCGCCTACAAGATAC
GTACGGTCCTTGACAAGTTCGTTAATAATTTTTAAACTATCAATTGCCCTAGCAGCAGAT
TCTTTGAAAGCCTTGTCCTCGTAAGGGACGCTACCACGGAACATATCGACCCAAGGGCGG
ACAATTTGAGGCGTTACAATGTCGAAGTTAATGAAGCACATCCACTTTAACATCTCAGCC
TCTTCAATCTCATTGATAGGGCCAAGTCCTTCCTTGTCATTGTGCTTTCCCTTTTCATAG
AAATATTTAAAAATGGCAATGACTTCAGATAATTCAAAGCCATCAGCACCAATGAAAACA
GGAAGCTAAGTGATAATTAGTCAATATTGCTCTAAAAGTTGTGCGTAAAAATTAGTACGA
TGAACAATATATTAGCATGTCATTCTCCAAATCAAATTTCGATTTTCGATATTTCTAAAC
ATGGCTTGAGTATTTTATATGAGGCAAGTCACAAATGGAAAGCAGACTTGCAAAAAGTTA
TAAAACCTTTCCATGTATTTAATCCGCTCTAAAAAATCCTGCAGGTTCGAATGCACAACT
CCTAATTATGTTGCCATCGTTGCTTTAAAATCAATCTTAAATTTACGTACCTTTTGGAGA
GGAAACTTTGCAGCCAAATCTGTAGGGAACTTATGATGATAAGTTTCAACAAGATCAACT
TGGAGATCAAGGCGTTTAGCCAACTCCAAAAGACAAGGAGTTCTAGTATTAGTTTTGAAA
GAATATATTGTACCCAAAAACATGATGATTTTACTAGATAATGAATTGGGGTTGGTTCGT
GGAGTGTGAGGTGCTGACCTAACATCACATATAGCAACACCAGAAGTGAGATGAAAGAAG
ATAATTTTAAGTATGTAAAAATTTTTATTTTTTACAGGAATTAACTAAGATTTTAAGAAA
AAATAATCATTTAGGGGTTCAGATGTTGGGATTACTCGAGAACTAATTTTGTACAATGGA
AAAAGGTAATATGGTAAGCATAATGACCTATACCTTTTCCTCAAGCGAATTAATTCACTA
CTTCTGGGTTAATTGAACAAAATTAGAGGATCATTGCTGGTAACGCAAATTACCATACTG
CTAGCTTCCATCAATAGCTGTAAACTACGCAGTTTGGTATCTGATTTAAGGATACGTAGA
ACTGCGGTGAGTTTTCCTTGTGACCTATTATATTACAATACACAGGTTGTATAAGTAGCA
ACTGAGTATAGGTATTGTATTAACTGGGTTATAATGTTACCTATCACTAATATAGCTCAT
AACTGAACTGAGGAACGAGGTTCAGCAGTAGCTCTATTTATAGTATTCAGATAATATTGA
TCTTAATAGATTATCATTAAGATCAATCTCCATATCGTATCATACATGGTACGATATATA
ATTAGAACATGTGACATATAGTGATACTCAACGTAGTGTATTATAGCGTAGTGTAGTATT
GCTGACACATCCATCTTTATCGTAAAACGGCATTGCGCTAAAGGTCGTATTAGTTGCGCC
ACATGTAGTGATCTATTTAGAATTTGTAACATTTTATTTAAGCTTAAAAGCTTTGTATAT
TTTATTTATAAGCCGTTAAACGGATAAGCATTGGTCATAATTGGCCGCTCATTTTTGCTT
TGAGGAACTTCGGCATTTTCATTTCTAAAAATTAAGAACATAGTTAATTTTGGTGAAGCA
CAAAATCTCTTATCTTAGTTAAGTCCATGTACTTAATAATCTTAGTCATTATTAAGCATT
CAATATATCAATTAATGGAAGAGAAGTTGGGTGTCGCTACCATTGTAGTAATGATAAACA
TTAAAATCTAACAAATCATCAACAATAATCCAGTAGGCTCTAACTCATACTTCAGTAATA
GTACAAATTTTTTATTTTTTTAAATGTCTGGTTTTCCTCTACTGTTATGAATTTTTCGGT
TAAGTAAAGCATACTAACGAAATTTACAAAATAAGACAACCAGTTACGAACTTGTTGGAT
ACTACTTATTTCCAATTATTTTGTTGCTTTTTTAGCAATTTATACTCATAAATTGAGAGT
TGAGATAAAATCAAGAGCAGTTTTTTTCGTATCATCACAAACCATAAATTGCAGAAGCAA
CAATATTACTGGTATCAAAAACTTTCAATATCACATTGATTAAAGGTAGTAATGCATTAT
GCAAGATTATAATAAAAAAGAGTTGGTTTACGGCTAAGGATATAATAGTGCATTATAAGA
GCGACGAGCTACTTCACATTACATTCTAACTACTGGCAACGGCAATAAGTAACATTAGCA
TAAAAATTGCGTGCTAATTTCGATTTTTTGCAATACCTCAAAAATATTATACAAGTGTGC
AAATTTAGCAAGGAACAGTTACTAAACCGCAAAAAGGTATTTAGTTCTGCAAATCAAGAT
ACCGGTTAATATTACTATTTATTGAATGTCCGATAATAGTTTTCGTTGGTTAAAAAGTTA
AATTGAAATAAAAATTAAAACTGAAAAATATTTTTGTGACTGACTTTTAGACTTCAAATA
TTTTTTTTTGTTTAGTTACGTTAATTATTGGTCTCTCTTGTCTTTCTTTTATGCTTTGGA
ATGAATGTTCAAAAGTCTAATAACGCAGAAGAAACAATCACCCCATTTTCTGAAGAGTCT
TCTCTGTTAAATTCGAATTCTTACATTCCTGCCACTTTTGTCGACCCCACCACTATCCCT
CAAACATCAACAGAAGATATTGATATACATGGCTTCAATTCTATTTTTGATATTCCCAAC
CTAGCCTGGATAGAAGTTTCTTTGTTGTTAAACGTTTTCCTTGCTGGTTTTGATGGGACT
GTCACAGCGTCTGCTTATACTACAATTGGTGAAGAGTTTCATGCTGCAAATCTTGCGTCT
TGGATCACCACTTCGTATTTGATTACCAGTACTACTTTTCAACCCCTGTACGGATCGTTT
TCCGACGTTTTGGGGAGAAGGGTATGTTTGTTTATGGCCTCAGGGCTTTTTTGTTTAGGT
TGCCTGTGGTGTTATTTTAGTAGTGGTATGGTTTCTCTAATTTTTGCACGATCATTTATG
GGAATTGGGGGAGGAGGATTAATCACTCTGTCGACAATCATTAATTCGGATATTATTCCC
ACGAGAAATCGGGGCCTTTTTCAAGCATTTCAAAATCTCTTATTGGGATTCGGAGCAATA
TGTGGTGCTTCTTTTGGAGGTGTGCTTTCCGAAGTATTTAGTTGGAGATTATGTTTTTTG
GTCCAAGTTCCTTTTTCAGTTTTGAGTATCGCGGTTGGTTTTTTTTTTGTAAAAAATCAG
AGCGGTTATTCAAGGTTTCATCATTATTGTGTTCTTTTTAAAAAAATCGATATATTGGGA
GGATTATTGTTGGTATCTGGTTTGACATCGTTACTATTAGTTTTAACGTTTGGCAGTTCC
AGATCCATTCAAACATATCGACCCTCTCAGCTTTTACTTTTATTAGGGATCTTATGTATT
GTTGCATTTGTATACGTCGAATCAATCACAGAAGCAGCACCCATTATCCCCTTAAAACTG
CTTAAAGGGCTATATAGTAGTCTTGTTTTGACAACTGGTTTTCTAATTGGTTTAGCTGGA
TATGCATATCTGTTTACGTTGCCATTATTTTTTCAATTGGTATTGGGTGATAGTCCTTCC
AAAGCTGGCCTGCGCCTTGCTTTGCCTTCCTTGTCCACACCTATTGGAGGATTGATTTGT
GGTATCCTAATGCATCGAAATTTTCGTGTAGGAAAACTACTTTTTTCGGGAGTTTTTCTC
ATGTCTTTAGGGTACTTTCTCAGCTTGTTTATCCATCCTGGCATTTCACCAATAGTGTTG
GGCATATTTCTTATTCCGGCAAACGTTGGACAAGGTATAGGCTTTCCAAGCTCTTTATTT
TCATTTATATTTGCTTTCCCTCAAAATTCGCATGCTACGTCTACATCTACACTTTATTTA
ATTAGAAGCATTGGATCGCTTTTTGGGGTAGGAGGGTTGTCAGCAGTCATTCAATTAACG
CTCAGGAAAAAGATGTTAGCTGACTTAACAAAATTCACTGACCTCGACTCAAAGAGCATT
CAGAAAATCATACATGACGTTAGCAAATCAATATCTGCGTTATATGAGTTACCAGAGGCC
ATTCAGGAAATTGTCTTAAGTGATTATACTTTTTCAATTCGAAAAGCGCAACAGTTTACA
ACTATTTGCTGTGTTTTAGCTCTTGGTCTCTGCATTTTAAAGGATACAATAAAACCACGG
ACGCCCTCCGGATTTCGATACTAGATTTATATTGGAACGCGTTGAGTTATTCTTATCAAA
ATAAAGAGCAAAATTAATGAAAACCAATTGAAAAATGGGGATAGCAGCAAACAAAAGAAC
CGGTTACGTTGATCTACATAAACTTTTTTTAAATCAATTACAATATAATTTGTTGAAATT
GATTCACCTGATAATCGAAAGGCGATTTAAACTCATATACAGTTACAAACCAATATTCAA
TATAAGAGAATTGAGTTTGGCAGCTTTTGATATGCATGATGAAAATTATTATAATATTTT
ATCGTCAACAAGCTTGCATTGTTTCAGTTTTATTTGGTCGATTTTTATCTGCTATATTTT
GATAGTCTATATGTAAATAAGCAAAATTGAAAAAATAGTTAAAATACTTAAATTATTAAA
AAAAAATCATTGGGTTTAAAGGAGCTTATGCAAAATAATATTATGCCAAGCCGTATATAT
ATGGATAGATAACTACACCTGTAGACTATAGGATATACTTATTGAACAATATCACAAAAG
TGAAAGCCGTATTAGTATATTTACACCTTATTTGTTAACGATCCAGCGAGATTAATTAAA
AGCAAGTAATTTGTTCACTTGAAAAAGAAAAAAGCAAAAACACTGACTACTATTATACTA
AGAATATTTGGAAGAATATTGCATCCTACTAATATCACCTTATCTCATCATCTTATTTCA
ATTAAAATATATTGTCATATCATAATGGCATATTATTCTCGGAGATCTTCGGATCGCTCA
TGACTGTTAGCATCAAAAAAAGGTACTTCACCCTGGGCAGCAATACGAACAAGATGGCGG
GTCTGGGGTAAATGATCATAGGTAGCTCTATGAATGACAATTCGATTGTCCCAGGCAGCA
ACACCATTGGAAGTCCATTTAATTCTGACAGTCGACTGAGACAAATTTGCGATATGCTGA
TATAAATAGTCTAGGATCGCATCTGATTCCCCTCTGGGTATTCCAGGAATGTATCGAGTG
AAGCCAGGGCTGATAAAAAGAGATTTCCAACCGGTCACCGGATGAGTGCGAACAATTGGA
TGGGCATTTGTATCTCCATCTAAACGAACATGTTGACCACTTCTACGATGATATTCAGAT
TGCTCTTTACCTGAATGAACAACGGTGAGTCCTTCTAAGTATTTTTTCAGAGGAGTTGAT
AATGCCTCATATGCAGCATATCCCGAAATAAACAGTGTGTCTCCACCTTGCTCAGGAACC
GTAAGGGCCTTAAAAAAGGTTTGAGCAGATGGTTGTTTTTCAAAACTTACATCCGAATGC
CAATATCTTAGGGAGTTGTTCTTCGCATGTTGATCATATGGCGAAAATCGATCTGAATAC
ACCACTTGAAATTCTGCGAACTTATCTTCAAAAGGCCTGGAATTAGAGCCGTGTTTGTGA
GAATGACCATAATATTGACCCAACTCTTGGAACTCCTCTAATGTTTGCTCTTGATCTGGA
AAATACACAACCCCACGTTCTGCAATGTAGCGAGCAAGTTCATTCTTTTGAGCATCATTA
AGTTTACTTAGTTGAATTCCATATAAAACTGTTCCTAAATCACGAGCTAAGTGTTCCACT
TTGGTTACGTCTTTCAATAAATTTGAAAACTTGGGATCCGCTAAAAGTCCCTTATCCTCA
AATGCCAGTTCACCAGTTAGATTGTAAACAGCGTTTGGAAATGTTGGCAAAACATTTTTA
TACTTGTAATCTTTAGGAACTGCGAACTTTTTTTCTACATCACCGAACCTTACAGTAGTA
AAATCAGTTCTTTGTTTATCATCTTCAACTTCATGAACACCGTTAAATATTTTCTTTGAG
TACTGAAAATCTGTCAATTTTTCATCGTGCTTGTCAGCTTTGCTAATAGTTTCGGTAAGG
GTTGCCATTGTTCGCGTTTCTCAGTTTTAATTGAAAGTTGGAAGTAAATTGTAACAAATA
AAAATCCTTGTAAATCGTCTGTTCGATTTAAGTATTACTGGTTGGTCACAGACTTTTGCT
CTCTTTTATAGTATATTTGCTGGTTCTAGATTGGGTAGCGAAAGGTGCATATGTTGATAT
TAAAAGAGTAATATTCGCATTATTCTTTTTCATAGCATTCCAGTATGACGGAAATGGTAT
TGATTATTTTGCAACCTTAGTATTGGGGTTAATGTAGGCGAAACTTTGATATTCAAAAAA
AAAGATAGAGATAAGATCCCATGAAGTACGAGGAGATATACTTATATTTCTAATTGATTA
AAAATAGTGTGTAATTTTGGTAAAATATTACGCTTATAACGAACTCGCTAATAAATTTAG
AAAGGTAAAAAAAACTCTCGAACGCAGCGAATCCGCGTTTATTATTTATACCAATAAAAA
GAAACATAAACAAAAAACTGTATTATTACTAACAAGCTGTAATTATGCTACATATATATG
ATAATGTGGATTCTTATATACAATGCATTACTTTTCGTAACTCAAACCTTTGGTGTGCTA
TGCAAATATCAACTATCTTCTAAATTCATAAAAATTCTGTATTTCTTAGTACTTTGCTCA
CAAAAACAATTAAAAACATACTCTGAAAAACTGGCGGATTGAAATTTGATTTCCGGCCCT
TTATAATCTTAAGTTTTTGAAAAGTGAAGATGAAAAAAATCATGTTATAAAAACAATTAA
TAGAGAGTTTTATTGTTTATAAAAGATTTATAGTAAATAATTTGTGACCAAAAGTCAGTC
TATTTCGGTAAGACGTTGCAAAAAAAAAAAATTGCATTGCAATTTTTGAAGAACATAAAG
TTATTTCCTAAACAAATTTGGAGTATAATATCAAGGTTGAAAATCTTCTTTTTTTGCACC
CCTAAAATTGTCATCATAAGGAAGTCGCAAGTTCAATAATAATCGCCTGAGACAGCCTTT
ATGAGTTGTTGCCATACCCGAAAACGAAATAAATTTAAGAAAGCACACAATTTCTATGAA
AAAGAACAGTAATAATCTTGGGGAAAACCTAATTTGCTTTCCAATGATGGTGCTTGACAC
AAAGGTATAAATTAACATGTAAGTGCATATATTTTTAAATATAGAAATGAGGTCAAGGTC
TTTTTTCTTTGATCGCTGATTTCCATAAAATGAATAATATGTCTTTAAAATTTCCGGACA
TAGCCATCAATTCTTCTGAATCCTCGGACGATGAAGATCCATCATCAAAAAATGAAAAGA
AAGATGGAAGCATCAAAGTTGTAAAAGGATTAACTGACGAAAAGAAAGTATTTGAAAAGG
CTAAAAATGACTTTGACGAAGCCCTGGCTATAATAGATGACGATGATTTCGAGTACACTA
AAAGTGAGGACGACAAGGTCAGACGGAAAATTGATTTTTTTATCTTGCCGATTATGTGTA
TCACTTATGGTATGCAGTATCTTGATAAAACGGCAGTTTCTTATGCTGCAGTATATGGAA
TGAAACAAGAAGCTCACCTCAGTGGGTATGTTTATAGTTGGTTGTCAACAATATTTTATC
TTGGATACATGATTGCTCAATATCCAGCAGGATACCTTTTGCAAAAGTTTCCAATTTCAT
ATTTTATGTTTATCGCTGCATTTCTGTGGTCGGCATGCGTTTTATTAATGGCAGCTTGTT
CTAATCGTCATGGTCTGCTAACGTTGCGATTTTTTTCAGGTGTCTTTGAAGGTTGTGTAA
ATCCTGCATTTGTAGCTCTCACGGCTATGTGGTATAAAAGAGAAGAACAACCGGTGAGAG
TAGTTAGCTGGTACGCATTTAACGGGGTCGCAATTATGGTAGGTGCGTTATTAGGATATG
GAACTGGACATATAAAGGGTAGTCTTCAAAATTGGAAGTATCCGTTTTTAGTCATTGGGG
CGATATCAACTGCCTGGTCCTTTGTCTATTTATTTTTCCCCCAAAATCCGGTTCTTGCAA
GGTTTTTGAATGCTCGAGAAAAGCGAATTGCTGTTGAAAGAGTTCGGAAAAATAGAACAG
GAATGGAGACAAAGAAGTTTAAACCTTCCCAGGCTTTAGAAGCTTTTAAAGATCCTCAAG
TAATTCTTATAGTTCTTTATAATGGTCTCTGTCAGGTGACTAATGCCATGTCTGTGTTTA
GTGCTTTAATTATTCAAGGAATTGGATACTCTGGAATTAACGCTACATTGCTCACGCTCC
CGTCAGGTGCTTTTGCAGTTGCCGGAATGATAGCTTCTGGAATATTTACACATTATTTTA
AAAAGGGAAGAATTCCTCTTGCCATGACGACAAGCAGTCTAACAATTGTTGGTTCAATAA
TGATTTGGAAAATTCCACATTCAAATCCTTGGCCAAGGGTGGTTGGTGTTTGGCTATTTT
GCACCATTTCTTCTGGTAACGCAGTTATCCTTTCGCTTCTCAGCTCCAACATATCTGGAT
ACTCTAAAAAGGTCACAGTAAATGCTACTATGTTTTTATTTTACTCGATTGGGAATATCG
TTTCTCCCCAGCTATTCAAGGCAGGACAAACTCCAGAATATATTGAGGGAATTCAAGCTT
CATTAGTCTCTGTCTGTTTGTTTGAAGGGGTATTGGCATTACTCGCATTTTATTACATTT
TTGAAAATGCTCGCAGAGACAAACTCTTGGAGAACAACCCTGCCTTAGGCGGTGAAATCA
AGAATGAAGAATTTTTGGATAAAACAGATCGAGAACAAATTAAGTTTCGGTATGTTTGGT
AAACTGTATTAAAGAACTACCTACTGCATAATTATTAGTTGTATGCTTGAATTGAATACT
GCTAAAGATGCTTCAGTTGACTTTCATAAAAAATATCATTAATTACATTAATAACTTGGA
CAACCATTGATTTTTCCTAAACTCCTATTTAAAATAAAGAGCACATTTGCCGGAAAAAAT
TTAGTAAGTATATGAGTTGCAAAAATTTCATGTTATCAACTTAGTAAACAACGCGAAATA
TCAGTATCAAATGTATGTTGAAATCGACAACAATACGTAAAGTCGTTGTACTTAGATTTA
CAGTAGGATTTTACATAAATAAATAAATACTTATAATTAAGGATTCGAATTTTAAATCGA
AGCAAACTTGTAGAATATTATTTGTTCTACGTCAAGAATTTGTCAAACATGATATCTTAT
GGTATGAAATCACTAATGGGTTAGTATTTCTTTATAGAAGCGTTGCTCTATAACAAATTG
TTATAATTCTAGCTTTAGCAATCATAGAAACTAGGAATTGTAAAAATCTGGATGGCAAAA
CTTCTACATTTTCTTGCTTATTTACGTTGTCATCGTTAGAATTCTATAGTTGATGTTTGT
AATCACATTTGATAGTAGATAGGCTTTGAAGTAAAGATTAAGCGCCTATTTAAACAGCTT
AATTTTTGAAGCAACTTTAACTACCACAATTCAAAAATTGAGAATTATATCGCAATCTTG
AAACAGATATTTTGAATTAAGTATTGAATGGGTAGTCATAACTTCTTGTTTACAGAAAGT
ATTCAAACCCAAACTACAAGCAATACATTTTTTATTTGAATCTTTTAGCTTCAAAATTTC
TCAGTTTTTTATTTTGAAATAGAGAACTAATAGGACTTGATAGACATTTTTAATACGAAT
ACTTAAACAATAAAAATACGGTTTATTAATTTAAACAATGCTAGCTTCGGTAGGTGAAAT
TCTGACTGCATCCATATAAAAAGTATAATTCATAGTAAGCATTGATGTTTTTAATTTGTT
AGGTTCTGACTCGTCAATTCGAAAAGGAAGTAACTATACAAGTATTTTTCCAAAGGCTAA
CCATTTTCATTTTCGACTTTTCACAGCTCTTATGTATTTGTAGGGGAAAACCTTTATGTT
GAGACGTTTGCGATAAACTAAAGAAGCACGCTAAAATTTTGTAAAAAGGAAGTTATTTTC
TAGTATAGAAGAAGCTGAAAGATAATTGTAAGAAAATAAGGGATTGAGAATAATTATTGT
ACAAAAGTTAATTCTTTTTCCTTTGGTTGTTTATATCTTGTTTACTTGTTTACAGAAATT
ACTATTGTTTTATTGTGTTATGCTATAGCATACAACGTTTTGTTATACGTAATGGAAAGG
ATTTCAATTAGAGATGACTAGAAATTAATGATTTGCAAATTGCTATAAATTTTGATCATT
AAAAAATTATTAAGATTCTGGTAATTATTGGCATAATATTTTTTCTATGGATCGCACCAA
TTCCTTTTTTACAACTCTTCGGTTCAGTGTTGATTATACGTCAACAATAAGCGATTCCTC
GAAGTCAACGAATTTTTGCTTAGAAGCACGCAATGTGACTACTCAGAGCGAATAGGGTAA
CCTGGGGGACCGTTCAGACATAGCGAGGAGATTATTATCAGTACTTAATTCTTCATCATA
TTTATGCTTTACTTGTGTTTATTTGTGCTTTTGTATGTTTTTAGTAAACAGTTTATGGTT
TGCGTCTTGATCTTGTCTATGTAAGGATATAAACACTCCTTCTTGTTTTTTATCTAAATT
CCAAGAATAATTATTATGTAATCTAATTAGTACTTTGTATAGAAAGATGTTTTAATATTT
TAATATTGTATTTCGTTATCTTCAACGGTACACTAGACTTCTGCACGCCGATGTAAGTTT
TAAGGGTTCAGAGCGAGGAA
>MTR dna:chromosome chromosome:ASM294v2:MTR:1:20128:1
AAAATTCGGGTAAAATAATTTAAAAAAGAAAAAGAAAGAAAGATGAAACTATCAGAAAAA
TAGCATTTATCTGAAACAACTAAATTAAAATATGCTTAGTGCGATTATTAATTACGGTTT
AAAGTGTAGATTGCGACTAAACGAGTATTATTCGTAAAATAACATTTCGTTGTACAATAA
TCCCTAATTTGTATATAACGTAATGTAAGGTTCTACTTTATCATTGAGCAGCGGTTCGAT
TTGCGACCCTTAACTATTATGTAAATAAATCCCGGTTCGAGTCCTATAAATGCCTATAAT
TTACAAGTTCGCAGATGAGCTGATGGATAAATAGTATAGCTCTTTCGATTATAGAAAGCC
ATTCACCCTAAACATCCTGAGTTCGCATGAATTATATCCTCTATTTAAATGTCTTATAAT
GCTGCTACGAACAGCTTTAGGGTTTTTAATGTATAGTGGGGGTTTTTTTTTTAACAGGTA
TGTTAAAAAGAATTAAATATTTGTTGTGATGGTTTTATTTAAGGATCTTCTTACCCACAG
CCTGAAATTGTTAAGTTTACCTAACTAAAGCATTAAAAAATATCGCTGTATAGGCATCCT
TTACCAAATTACTTTGCCCAATCTTCCTTTTATATCTATTCTTTATTGATGGAATATTAC
GAATCAAACACAGATGTAGGTGCTTTAACAGTTTATCATGATCATCGGTTGTCTTTTTTA
ATACATAACTGCAACTCAGCATGTGGAACAGGAGTCACTCATCTACGGTCTAGTTACGAT
GTCATAATATATAAGCATAAAATTACTGGTGTCTAAACAACCTAACTTGATTTTTTAAAT
TCTACTACAATATTTCAATTTTAACTATCAGGTATGATTTTAAATTTTATATCATAATAC
AATTATCAGGTATTTGAGAGAAACAGCCAGTGCGTTTTGATGTTGCATCATACTGGTTAT
TTTGCATTCAATCTGTCTTGAGCTCAACGTTGGTATAATTAGAGCTTCTGAGTTTATATT
TTGCAAAATAGACATTGGCTTCAAACAAAACAAAGAAGTTTGGTTTGTAAATCCGTAAAA
ATTGCATTGGTATGTGTTGATCGTGAGTTTGGGGTTTGCCGAGAAACTCAATTCTCTCGA
CAAATAAATGTGAATTTGAGCAAAGGCTACAAAGTTTCTGTAAGCATTCTTCGATAAGTC
ACTTAGACGGTTCGTACTGGTGCCCAGGACCCCAAACCATCAATTGACTTGTCCCTGCTT
TAGAAGTGTCAGGGTCATCGCCATTACGTCTTTACCTACTCATATTTTTAGCAATTATTC
CAATTCATCTTAAAAATTTCAGCCAACATTATCTAGTCAGAAATCATATAGAAGTAATAT
GTTTTATATTCGCATATACATTTGTATAACTCTTGACTTTTTTTAATAAGCAACGTTGCG
AAAATAAGTATAAATTCTTTAGCTAGTAGATCAAAAAATTGGATTGTTTTCATATGCTTC
CATCTATATTCTATTATTTAAGAATGCAGATGAATTCATCATTACCATGTTAATGTAAAA
GAGCTGGCCACCATCTTATAACCTTTTCTTTAAAATTTTTATAAGTATAATAGTCGCTCA
GGAAAAAGGAAGAACGGCAAATAATAGAAAAAGGTGGAATTTCTTAAATTTGTAATTAAA
GTAATTTCTATTCTTTTGTATGAAAAATCAAATCACCGCTTTTGAGATTAATCGTTTACA
TCTGGTTTTTTAAGAAACTGATTATAAATCCAATCGTTAAACTTAAAAGATCTTTGCTTT
TAGAAAAAGCGCAAATACAATTTTATGAGAACCCGACGATACAATATATAGACTATGGGT
TGATTATAAAAAGCGGAAGGAAGTATTGATCTACATAACTTACTATGTCATTACCGTTGT
GTAAAAGTAGGCAAAAGTTTAAAATGGAAGCAAAGCTGGACAATAAGTGTTGATGCGGTA
TTTTGGAAATAGAAAAACAAAATTATAATTCAGAACAACCTTCTCATAAAAATCTGTTCT
ACTCATACCAATCCATTAAAAAGCCTAAAAAATACCTAGACAAATGACCAAGATACGCTA
CTAACTTTATAATAATATTTCGCAAGCCGTCTATTGACTTTCTCACTTTCAATTTCACAC
AACATTTAAATACAAATGTACATTTACAAATATAGTAATATGCTGGTATGGACATAGCAA
TTTAGCACTATATTAGCCTTTATTTAACAAAAATCACTCTTTAAATAAACAGTTCTAATA
AAAAATTCAATTAAACCCATTCAAAAACTAACTTTACAGTACATGAATAAAATCTTAAGA
TTATCAAAAAAACTTTCAAACATGTTCAAAGTTTACAACCATGTAGGCATCGAGAAAGCT
GACAAACAAAAATGAATACATCACGTTCACTTCCCAATAGTTATATAGTTATACATATTT
CTTAACAATTTAACCCTCTTAGCTTTCTACATTTCCAAACATCATATTAAACCTACTCGA
ATCCATATGACTACAACTACCTTCTAAAAGTTTCAAAACAGTTTGAAAAGTTTCACCAAG
GCAAACAATTATCTTTTGAAATACAACATTTCAATATGTCAAATCCTCAAAAACATACAG
CAAAAAAATGCCAACATGATTAAAATAAAATTTTAAAATACCCAAAAAAAATCAACCAGT
AGGACATTTTTATAGTTCCCAAATACGCATCTCCACTTAAAAGAATAAAAGGAATTTATA
TTCCAACCTAAACTCAGCAAAAAAATTCATTATGATATAAAACATAAAAACAAAAACAAT
CACCAAAAATTATAAAGAAAACCAAATCTATGATTGCAAAATTCTAAAAAAGACATAAAT
CGCAATAAAAAGAACAAACTAATTAACTAATAATAATAATAATAATAATAAAACAAAAAA
GGAAGAACTAACAACATTTTCAATTCCTCAACATAAATGAATTCCATTTAAACCACAATT
ATTTCATAAATAATCAAAAAAATATATATATGAATACCACATTAACAAGTAGGAAAACAA
ATAACATGTTCCTTCGCCTACGTAAGTTTACAAACCGGACAAAATTATAAACTAAATAAA
ACTAAAAAAAAAAAAGTACACAATTATAAGGACCCATACAACAACGGATTACTAAAAACA
GCAGTTTAAATGTTTTAGTTCTGCCGCGCGCGAGCCTTAAACAGTTGCTTGCTTGGCAGC
CTCGTAGGCTTTTAAAAGTTATTTTTCTGTATGCATATGCATATGCATTTGTATAGCATA
CAACCTTTAATTTAATAGCCATACAACCTAATAGCCAGAAACGCCTTCCCAATTTACTGA
ACCCTGCTTATATGTAGTTTATAATTGTTGTGTCCATTTAATCTTTTTGAATATAGTATG
CGCTCTAACTTGGCAATTTGTCTCCTAACGTCCTGATAATGACTGAGTTCAGCTAATTGT
GACCAGGCAAGTCTAACATTTTGTGGTAATGTATGCCAAATTATTGAGCATTTGGCTGAA
GCACCTGCCCAATCTCCTGATAGATTCAAAATTTTGTGTAGCCTACTTCTAAATAGCATG
AATCCATTTTTGTAGATTGTGGTTTTGTTTCCTTTAATTTGTTTCTTCTTTTGTAAAGTT
TCTGGAGTCAAAATTGGCAAGAAAATAGGTGCTCTTAATCTTGGATCCATTTTATTATTG
TGCGTATTATGGCTTGGTGTATTTGGAGGAGTGCAACTCTGCTACTGCTGTGGGCGTTTT
ATATCACTAATGCTTTGTTCCCTCTTTCTTTGTTCCTTATGCGACTTTATATACTCTATG
GTTAGTAACACCAATACAATTTCTGAGTTTTATTTTAAGCAATTCATTATGAAACGAGTA
GCTGTTTTATTAAAGACTGTAATGTGTGAATTTCTCAAATGTGATTACAATGGATACGAT
AGAATCATTTCTCTTTTGCGGCGTATTCTTACTCTAATTTGTACTCCAAACTTAAATGGG
TTGACTATTAAACGAGTAATTGATTCTATGCAGTCTTTGGAATACATTAAACAAACATGT
AATTTCAAACTTCAAATGTGCATTTCCAGTATGGCTTTTAAAAGAAACAATGCTTTACAG
AATTGTAATCACTATGCTTGGTGTGATGATCATTGTTCAGATATTGGAAGACCGATGACT
ACCGTACGCGGTCAGTGTTCCAAGTGCACTAAACCCCACTTGATGCGTTGGCTTTTGTTG
CACTATGACAATCCATATCCCTCTAACTCTGAGTTTTACGACCTGTCAGCGGCTACTGGA
TTAACGCGTACTCAATTACGTAACTGGTTTTCTAACCGACGACGTTGAATTATGTTAGCT
TAGAATTGTTAGTAATATATCCAATTCCTTCTTGTATATGTTATACATCAGTTTTAATGG
GCCAATTCTACGAAGTTTTAAGGTATTATTCATTCGGTTTTTGTTTTTCATAAATTTTTT
TTTTGTAATATAAATGTATAGTCTTTCTCCTTTGTTTTCTCTCGTTCGTTTCCATGGTTT
GTGATTATGCTGTTCAGCATTGTAGATCATATCCGTCGAAATCGTTTAAATACTTACATA
TTCATCAAATTTATTTCATACATTAATTTTAATTGTTGAATTAAAATAAAAATCCCTTTT
TGGATACCGATATTTCCGAATACCACGAAGTTATTGGCATCTGTATTTTAAGCAATTAAA
TGCGATTTGATTTTAAACAGGATTAATAAACGAATTTATAAAGCGTTAATATATTACTCA
ATTTACCAAAAATAATTATTACCAATTGCTGATGATTCTTATTATAAAAATAAATATTAT
AGTAAATTTACCTTGTGGTTGATTTCACGTTATTTTGTGCCTATATTTAAAACATTTTAA
ATATAAAACAAAAGATTAGCAAGAAATATGCTTCGCTTTTAAAAATCATCTAGATTGTCA
AACTTAAATCATATAATTTATTTTCAAATTTGAAGTACTGCTATCCCCAAATTGGCTTAC
GCTTCCTTGTTAGTCCGTTAGTTAACCCGCAGCAATAAACAAGATTAATAGTTCATTTCT
ATATATAATTTACCAACCGAAAGAGTAAATTTTTTGGTAGCTTTTAGCATTCCGTACAAA
AAAAAAAAATGCTGAAATATCGTATATTTTCCTAACGGTTTTTTTAGATTACCACAACCA
TTTGATTTTTTTCAGTCCCACATTATTAACTTCAAAGTTTCCTTTGCTTGACTGTCTTCC
CTGCGTTGGACTTCAATTAAATTCCATCAAAGATGCGATCTTTTATGCATCAAAATCTCT
ATGTTTTATATCGGTTGAAAAGGTAACACGGATGGTAGGGTGTATATCTTCAAGTTCTGA
TAAAAGATAATATCAACATATCTGTGTAATAGCTTGTTTGCCATTTAAGGAAAATCTGAT
ATCTTTATATTCAATTGAAAAAATCTTTAATGAATATTTGGTTTCCCGTCTACTTAACGA
TAGCTTTTCCTCCAAATCCAGATATAAATTGCGAGATCAGTCTGAACTCCGAAACTGACA
TTCTTTTGATAAGTCGGTACTTCAATTCAATAAAAGAGTTCATTAAATTGATCGCATAAT
TTGTTATATTATTTTAAGCAAAATTTCGACTATAAACAGTTATCTATATAAGTTAGTTGC
CGCAGGTTGCTGAGATTTTACACGATTTAAAGGTGTTAATTAAAAGAATTGTAGGTTTCT
GGAAATATTAACATTTGATAATAAGAGTATCGCAACAGAATAAAAGACGTTAAAAGTACT
TCATGTCTAATATTATTTCCTAATACAAATATATTATTAAGCTTGTTGACTTTACTGTAT
TCTGGACATCTGTCGATCATAAAAACTTTGTGTTGTATGGTATACAACTTCGTGAATCTA
CATATTATTGTTACGATACCTAAAATAAATTACCTCATACCTTCAGTCTTGATTATGTAA
ACTTATAATTACGAATCATTAGCTTTACTGGGTCACGAAAGGGAAACGACAATTTTCAGC
ATTACAAAAACGATCATCAACGATGTTAATCGTTGAATCGCCATTATATACTTAAATTTG
AACACCCTGAGTGAGCCAGAAGAAGGAGCAAATTAAGCAAATTTACTCTAAAACATTTTT
TTTCGCATCATTGTGATTAATTAATTATGATAAACTGCGAAGACACAATTTACAAACTTT
CAAATTGTGTCGGACTTGCCCCACTTTTAAAAAGTTAATAATGCCTATGGAAATCCTTTC
CCAATATGAGTTGAATTTCTGTATCTAAGGTATATAGAAGCAGCCTAAGCTTTCATATTA
ATTCGTTCGAAAGAATCTCTCGGGTGATACAACTTCTTAAACTACTCTACCTATTGCTTT
GTGATGACACGGCTAATAAACTCAATAAGTAAAGGTACCGTCACCCTCATCATCAGTTTT
AAGCGAAAACGCATTGCGTTGAACATTCATTTTAATGAATTAATTCTTCGTAAATGTATG
ATTTTCTCGAGTTTCGAAAGTTTTTCCTATTTTCCAAACATACTTTAAACTTCATATAAA
CTTTGTTGATAGCTATACGGTATCACTAACGAATTTATATACGTTACTTTATTTCACTGT
TTTATCTAGCTTTTACTATGAAGTGACGTATAATTTTTTTTTCTTTTTGCAAAAGAAATC
AATACATCCCAAAATACACTGTGAAGTATTTTTAAACATTAAAATACTGTTATGATTGGT
TATCGTTGGATGATTTTTATATCCGTTTATAATTATGTCGGGATGTCCATAATTCGTGTT
CAAGATTTTTGCACATGCGGAGATAAAACCCAAATAAGCACAATATAAAACTATCTCGTA
TCCAAAGAAACTAAATGAAATATTTTTTCGAGCATGTTTCGAATAATATATCTTAAACAG
AATTCATTAAGGTCGATCATATATTACAGAAAAGTGTTTGTAAGCGGCACATCCATTCAA
TAGTTTGTGATTGGTCATTTTCGATGATTTAATTGAAAGTATAAAACTCAATCTGAAAGT
GTCTGTTTTCCGTTCTATTTCGAACTTTTTTCTTTAGCAGTTGTTGGACAGTGGAAATAA
TTTTTTAAAAAGTTCACACACGCTTTGAGAATCTCAGAGAAGTATCTAATGCGCGAAGAA
AGCACAATGATAAGAACGAGTTTTTGTTGAATGTGAAGGTGGGTTCAATTGACAAAGCTT
TTGTGGACGATGGAGGCAAGATTCAATATAGTAATCAAGAAAGATGTTAAGTCAATTCAT
CGTTGCCTTTATCAGTCTGACTTCGTTCACGCCGTAGCAACTTACTTACATGGAAGTGTA
AGCAACGAATGAACTGTGACGCGTTTTGAAAACACAGGTGGAAGACACAAGATGATTGCT
ACTAGGGACTTGGTATCAACGATATAGGGATACGTTTGGTAGTGCAAAGTAAAATATAAG
AATTACGGATTATATATAAAGGGAAAGGATGAAATGAAAGGTATGTAATTGAAGCAAATT
TTACGAGAAATATGGCTCCATTGGTTGAATCACATGGAGGATTCTATGAGAATTTTCATA
ATAGTAAAGCGATGCGCGCTTGATCCTTTTTCACAACCAAAATGGATGGCGACAATGTAT
CCTGCTAACTGTATTTACTGGTCACGATGCTTAGGCGGTGTAATTAGTGAATTAGTCATA
TCTCCAATTATATAACTTGAAATGGTAACTGTTAGAGACATCGAAACTTGCTATTCCAAT
TCATTCGCGTAACGATACTTCTTATCTGTCTTCTCCTCCATAACAGCCAGGTAGCGGCAG
TATTACTTGTATTTCCAAAACTAGTATTCTGTCGAAATTATCGAAAGCTACATTTTTCCC
TGCTTCAGTTTCGCCAACGTGGAAGAAAAGCTTTAACAACGCATAAATATGGCTCGGAAG
ACATGTCCTCAGCTATCATTGTGGTCACAAACACATATTATATGGATATTTGAACAATGT
ATAACAAGCTGATAAAAAAAAACAATATAGTGGTGCTGATGGTACCATTCAACTTGACAA
TCATTAAAGCTCTCTGCAAGCACCCTAAAAAGCAATGAATAGACTCCATTGAGGAATCTG
TGCAACTTGAGAGATTCTCTTAAGTGTATATAGATAAATGTTTAAGCTACGCTCTTGCTA
ACCTTTATACAGACATTCGCGTTTATTTACCGAAAGCAGGTAGTGCTCACATATCTGTTT
ATTATAAGCGTAAGGCCAAACACAATTTGGTTTACTAGAAAAATATGTATTCATTTCAAG
AACCTTGTTTGTTTCGTGGTTTGACAAAGTTCGAACATGCTAGCAGTGATATGACTTGCG
CTTCTGATTGCAGTTCACGAACAAGAAAGACAAACTTAAGTCGGGGATTTTCTATGTTTG
ATACATTACATAAATTACGGGATTAGTGCTGCAAATGAATCCTTAGTAAGGATGTGCTTA
ATCAAGCTTTTAACCTTTAATGTGACGGATCCCATGAACCATTTATTTTACAAGAAGAAA
AATAAAAAAGTCGACTTGACCCAATAAAAAGGATTTGAAAATTTTTAGTAAAATATATCA
TTTCTTTTCAATAAACATCAGCAACAAATCATTAGATACCAAGTTACAAGAAAGGCTCAA
AAACTCTTATTCTCCTGTATCACTATATTATCCTATGATGTGCTCTATCTCTCTATTACG
ATCTTTGAGATTTTTCCTTACTCATTCTTGCTAAATCTTGAAAATACTAATGTTTATTGT
CTGTTTGTGGGTACGGCTGATAGAATATATTCACAGTCCTAATTCAACTACGTGAATTTA
GACACATCGCCCAGTACTTTAAAACTGAAAAATACGAAAGATATGATAATGAAATTTATT
TCAGTCTTAATCCTGATATAGAAGAAATAGAGTACTTCTACTATATGAACGCATCATATA
CTACTCGCATATTGCTGTCTTCTAAACTTTACCAGATTTTAAGAAACTAAGATTTAAATA
GAATGAACTATTACAGATTAAAGACAACCCAATCGTAAGCTATTTGATATAATCAGTCAT
TCTTTTAAAGCAATTGATTAAACTGGAAGAAATACTCAATGAACAGTAGTAGACGGAACA
AATGATGTGAGGTTAATGATGGGTTCATCGTTTCCATTCAGTTTACACACCATACGAAGA
GGAAAAAGAAGTTGTTAAAAAAGAACACCGGTGCCGTCAGTTGGATATAAAGAAACGAGA
GCTAGTACGTATTACCACACCACCACAATTTAACCCGATTAAGCAACATCAAGAGTCCTG
CAAAGACTGAATCAATCGATACATGTCTCGCTGAAAAACTTTATAGTTGAATGTTGTCTC
AATTTCTTGTGATATGAGTTTCAAGTTTTGATCTTTTTTAAAATCGTCATCAATCATTTC
ATCTTCTAGTTTGTTCGTTTTTTTTAATTTCTAAACAATATCGAACTTTAATTACTGGAG
TTCAGCCGACTGGAGATGTAAAAGTCTTTATCGTTTTTTGTTGACAATCATACTCGAAAA
AAGAAATCAACCCAGAATTGAACACGAAGTATGACCAGAATTGCTCTAGTACACGTAATG
TCGTCATGGCAAGAAATTTTGGTGATGTGGGTCTACTAATCCAATAATAGCGACTGCTTA
CTTATTAAGAGACTTGAAGGCAGTTCAAACATACCTGTGTCTGCTCACATATGCAGCTTC
CGGAATCTGTTTTCATCCTACATATTCTTACCCTTCTACTACTCATTCACTTTATGTTTA
CCCTAGCAAAATGAATTAACATTATTTAAAAAGAATTGGTCGAAAGCATCAAGACTATCA
AGCTTAAATACATTCAGTAACGAAATTAGTCATATAAAGTCTTTCGTAATACACAAATTT
TTTAGCGCACACGTTATTCCTGCTTAAAGCTCGTTTCTCTTCATCCATTTTACACAGATA
GTGTGATCACGAAGAATTACTAATAAAACATTGAGGCGTTATGAGATCTATGTCGCTTCG
CAAAACCGTATCTTAGTACGACATAAAGTTGCTTTCGGACTTGAACGTTGACTAAATAAA
TGTGTTGCCTGATTGTACATGATATATTATCAGCTTTGTCAAGGGAAAAACCGAGACCGA
AGAAAGTTAAAACTGAGAGAAATTCCAGATATGCTACTATAAGTGCTCTTTGTCATGAGA
GAAACATGATTCTACGTGTCTGATTCACGCAAAGGATGCATCAATGTACCTTCTTTTAAT
TACAGGATGATGCATTTTTAATTTGTTATTGTTGTGAATTCTATGTCAACTGTTTGCTAA
TATAGGCGGCGCAGAGATATGAAAACCAAACCGTGACAATACACCTAAGCTAAAAGGTCA
ACGCACGCCTAAACTAGCAGCTCAACTCATGATTGGACTAATAATTTAAAACTAAAACCT
AAACCTATTTTACAAATAAAACTCATAATTAGACTAGCAACCCTACCCATCAACCAACGA
CTTGACGGTATGCTATTCCTTCTTTTTTTAAGGCTTCACTACCATCGAAATATATATAAC
AGTAGTAAAATTGTAAACTTTTATTTTTATACCATAGTAGTATGGCTATGAATGGAAGGT
TGTAGTGTCAGTCAAGTCGGAAAAACTGTTGGCACTTTTTTTCTGAATCAATGGTATTCT
TATCAAACACATGCAAACGTATAAAGAAGACTTGAATAGATAATCTTTGCATTCAAACAA
ATCCTAGTCAACTGAACAACGCATCTACCTCAGCAGTTCTTGGGAAATGTATAATAGGCA
AGCATTAAACTTTTATATATAAAACCATCGAGATCTCTGTTTTTAACTCGGTGGTTTCTT
TCACAAGACTTGCTTCAAGGACGACAACACATCCTGACAGTTAATTCATTAAATACTAAT
ACTATTGAGGATTCTGTTATCCAAGTGGAATGAACATGATCATCAAAGGAATGTTTCCTC
AAAGTGAGAACTATAGTGTTGCAAGAGCGAATACTTGGTTGCTTAGAACAAAACGAATTA
CTGTCATTAGAATATGCTCCAAAGTGTGACGCTATATCTTGTATCTATTGCTACGTTCAT
TCATTGATCCAACAGCATGGGTATAGAGAAACGATAAGCAGGAGTTGCGCAAGCGAAGTT
ATGGAGTTTCTTGCATGCATGCATGTTTTGGCATAAAGCTGGTACTTCGAAATATGCCTA
TGAAATCTCTACCTGCTTTGCACCCTAAATATAACGTGTCGTCTTGTAGCTGCATGTGAA
TTACAACGATTGATAGATGAAAAACAAATCGACTTGTTGTCCATTTCATCGTTTCAAACG
ACTGGTAGTGTTGCTTGTGTCCATATCCATACTATGTCCGTGTGTTTTGCTTTATTACAC
TTGGTCAAAGAAATCTATATGATGTTCTTTACGAAACCCACAAAGTCATTAGGGATATCA
TCCGAACAGAAGGGTATATATGCAAAATACACTGCAAGGACTAAGCCCAAGCACCGTATT
GTTTCAGTCTCGAAGTAATTCTATGTACCCGTGCATTGGACATGGTGCGATTGGACTTGA
GTGAGCTGACAGCACTGTATGAGGGTCTGTTTGCCAAGATTCAGGACTTGTTGAAAGAGT
TATGTTTTGATACAGATGTGGAAAAACCATTATCCATTTCGTTGCTAAGATCGATTGGTG
ACGACGATATTATCAATAGCAAACTGGGATATTCATTCTTTAAGGATTGTATGGAGATAC
GTTTTTCGAAAAGTGTATTGTTACGAATACCAGTGTATAAGAACAGTGAACTTTATCTTT
GGTTTTTATCGTCGATGTCTAAGAAGGATCTAAGTAATTTGTTTGAGAAAACAGATCAGC
AAAACAAACAATTGCTACAGTAACTCCAATATTAGCAAGAGTTATTACAACTACAACTAT
AACTATAACTGCAACTATAACTACAACGATAAGAACTATCACTACTCTGAAGACAACGAT
GTGTTTTCTCAAGATGATAACGGATCTAGCTTCGCCATCAATAAGTATGAGACAAAGGAG
TCCATCTTTGATGAAACATCCATTTGCCTGTTGTACATTTTTGCAGGACAACCAGCCTGA
GCACAAGAGACATGGTGTACTAGACTTTGTGCGGAATGTCTACTTCAAAACTCGCATCTT
TATATCTGATATATAGAGAGAGGCTGATGATTTATAAACACAAACGATAAGACTTGTAAC
ATGAAGTTTGTCGAAAAAGTCAATCTTTAAATTCCTTTCTGAACCTCTCTGTTATGTCAG
TGCTTCGGTATTATGCTTTAATGCAGTCACTTGAGGCGTTGTCCTAATAGGTCCAAAGTT
ACCGTATATTTAGGTTTCATGTTTGTGATTACTGGAGAACGACTGTGAAGAGACCAACCG
TATCGTGTTTTTTCCAATTGTGATCTTCCAATGCTTAATAAATACGAAATCTTATTTCGA
TTTACAGGCTGGGCATTCACGAAACATAGCGTTTTTACATTTCTACAGGCACACCATAAA
CAACTTGCAATATCTGCCATCACTTTATTTCTCCAACTTTGTTCAAGTTAAAAGTGGCAG
AAAGTGTTTCCCGATATGAGATAACCCAACGCATATGTTGTTGCAAAAACTAAACGCCCA
TTCATCAAACGAGTCGAGATGAGAGGAATCATTGTATAAAAGGCTAGCATGTAAAAGCTG
GAAGAAGGAAAGAACACGGGATATGTAATGGAACATGGGACCTCTTGATATGGACATTGA
TATGAACATGAATATGGTATAGAGAACTACATCGACACAGAAAAGAAAACAAAAGTTGCT
AAAATGACAAAGGTGCCGAATCAACAGGCCATAGTACCGATGGAATCCAAATACAATCCA
AGAATCATTCAAACATCGCAAACATCTTTGCTCGACATTGTTGTTTTGAACAACTACTAA
GAGTTGCAAATGTGAAAGCAACAACATCCAACGTATCTACAAATTTCTCGCTGTTTTGCA
TATACATTTATATTTAATAGTGAATTAGCGTATAAGAAAGAAATGGAGCTTTTTTGGATT
ACAAGTGATAAGAGTAGGTGTAGGAGTAGGACTCATTTATTGAATCTGGTGATTTGCGTC
GGAAGGTTGAGAATATAAAGAGCGTGTGAAACAAGCCATGTAATCTAAAACTTTACCGAA
ACTTTCAGATCTCGCCTATTTACCGATCCAATTGCTAGTGCAGTAATAGTTGCTTGAATT
TTCACCGGATGAATCTTCTCTTGAATAAAACCACCAATAAGAGCTAGTCAAGTTGACTAT
TAAAAACACACAATATTGAAGATGGCGGTTGGTGGAAGCTTTCCTCTCAGCATTCAGTAT
TACACAAACGGATTAAGGAGAAGCGGTAAACGACTTTGAGGCTCATTTATTGTAACGATT
TTACAGTCTTTCTTTTTTCTTGTACGATAATTATGTACCATTTTGCTTAATTCTCTTTAT
TTAAGAAAAGAATCTACTTTCCTCTGATTCTTCGTACATGGGTCAATTAATGTATAAGCA
AAACCTCGGAAGAGTACAATATGACTTCCAATGCGAAAGAAATGGTATGAAAATGAACTA
TATACGATTATTGTTTTTTTAGTGACGGGCAAAATCATTATCGAGTGGAGTGACTTTTCA
CAATCCCTGTAATTCAGTTGAGATTGTACTGTACTGTATTTAAAGTAGGTGCATATTTTC
ATTTTTAAATTATATTTGATAATGGGTTGTTTTTTATTTTCTAGCTAAATCGAAGGATTA
AACAGTATCTTCCACATACGTCATCAATTCTATAATAGAAGTTTTACCTAATTAAACAGC
AAACCATTTAAATAAACTCATATTTTTCGTGGCTAGTCTGCCAAATTCGTTGACTTATAT
AGATATGAAGGGTACATATAAAAAATATGAGATTCGAAACGGAGTTAGTATGTGGAACAA
GAGAAGTAGATACTGTTTTGTTCTTATATTTCTATAGTCCGAGGCAATACAACTTTGGCG
ATCATTTACTTTTGTTTTTTTATGAGGAGCAATTTGGCAAATCAATTTGGGCAATCACAT
TAATCCCTAAAGTATTGGCTTGGAAAAGAACAGGTATGTTTTACTCTGTAAATATCTCCT
ACTGTCAACCTTCAAAACACACAACATTAAATAGTAATGTGTTACGTAAAAAAATAGTAG
AGAAATGCAATTAACAACACTAAGCATACCCGGTGTCTTATACATCAGAAAGATATTTAA
ACCACTATCGCAAATCCCAAATTTCGCAAATATTCACTAAAAGCTCATTTACTGCCTGGT
AGCTAACTATCGAACAGTTAAATAAAATTTGTACTGTTTTCGACTTGATGTAAAAAAGAT
TGGATAAAGTGAAGAGAACCCTACAACAAGACTGGAAAATCAAAGTGCGCTAAACAAACG
TTTTCCGTACCTTAAAATGTAAGCAGGCGAGGAAGCAAAATGTTTGAATAGCGTAACTGG
GGTTTCTGAAAATACAAAAATAGAGGAAATGCCCAATAGATCATTCTTGCTAAAATTATA
AATAAATATAATGAAATACACAATTTCAAAAACAAAACATCAAAAACCAGGCAAGAAATG
GTCAACAAGATTTTAACATCCCCCAAATGGAATGGCTATCCAGTCTTCACACACAATATG
CATTTTAATAGAAAAAAAAACATATGTATATTTTGATCGCATAATTGACAAACACAAAAT
AGTATACAATCAAACAACATCTATTAAGGCGTCTTTCAGATGAGCATCAGGCTAAAGAAA
TATTACTCACAAAGTGAATGGCCGACCACATATCAACGGCACAACAGTATATTGAAATCA
AAACGCAATTCAAACAACATACCACCTCATCAGCTAAAACTAGAATTACATCCGTCTCGC
CAAACCTAAAAACTTGATGAAACAAGAATCTTAAAACTAATAAATAAGGCGGACTTCAAC
TAATTACGCAAGTGATTTCAAGTAGTTTTAAGACTCATATATTTGTAAGTCACGTTTGAG
AAATCAAATCTGCGTTCTCAAACAATAACGTAAAACACAAGAAAAAACACTTAAAAAAGT
AAGACAAATATAGAAAAAAAATTTTTTTATCATATCAATTACAAACATATTGTTTGCTGC
AAAACAAAACTAAACATAGGTGAAGTATCCAATGACGTAATTTGAAGTACAAAAGGAGTA
ACAAGTTACTTATAAAAATAGAAAAACAAAATGGATTATTACAAACTTAAATAGGATTAA
ACTTAAACTAATTACACCAATCAACTTAACATGAAGCAACTCCTGATACTTTACAGGCCG
CCGCACGCGCCTTAACAGGTGCTTGCTTGGCAGCCTCGTAGGCTTCTAAAAGTTATTTTT
CTGTATGCATATGCATATGCATTTGTATAGCATACAACCTTTAATTTAATAGCCATACAA
CCTAATAGCCAGAAACGCCTTCCCAATTTACTGAACCCTGCTTATATGTAGTTTATAATT
GTTGTGTCTTTTTTTTACGTTTAAGTTGTAATTTGATGTTAGAATTTATTACAATGGATG
CAAGTTTTAACTCAATTTGATCACATAGGATTTGAATTGTAAAAAGGTCTTCTGCTGACA
TTATTAGTATGTATTGTGCTTTAGATTAAATTATTGTGTTTTAGTGTATTTTGTTCCTTT
GTTTTTGGGTTTCTTTGTTCTGTAAGTAGTTAAATACCCTCCACACTCTACACCTACCTT
GCACTCACAACTACAATGGACTCACACCAAGAATTATCAGCGGGTTCCCCTATTTCCTAC
GACTTTTTAGATCCAGACTGGTGTTTTAAAAGATACCTTACAAAGGATGCTCTTCATTCA
ATTGAAACTGGCAAAGGTGCTGCTTACTTTGTTCCTGATGGCTTTACTCCTATACTCATT
CCTAACTCACAAAGCTACCTGTTGGATGGGAATTCTGCACAACTGCCAAGACCTCAACCA
ATATCCTTCACATTGGATCAATGTAAAGTTCCCGGCTATATTTTGAAGAGTTTACGGAAA
GACACTACGTCTACTGAACGTACTCCGAGACCCCCTAATGCTTTTATATTATACAGGAAG
GAAAAACATGCTACATTATTAAAGTCTAACCCTTCCATCAATAATTCACAAGTTTCCAAG
CTGGTTGGAGAGATGTGGAGAAACGAATCAAAGGAAGTACGTATGCGATATTTTAAGATG
TCTGAGTTTTATAAAGCACAACATCAGAAAATGTACCCTGGTTATAAGTACCAGCCTAGA
AAGAATAAAGTTAAAAGATAATAATGGTAATATTTATGGTATTTAATAAAGAATTTTGAA
ATTGATTTAAATATGCTTCTTAGAGTTACATTCACTGAAGATTATAATGTAATATTTTGT
GTACCCCATTTGCGTTGAGTTATTCTATAGTAATTATTGTGTGTTCTATTAACGATGTAT
TGCGATTTATATCTGTTATGCTAACATAACGTAGTTCTAAGCACTGTAATGCCATACTGT
TTTAGAGGGTGATGCTTCCTAAAATCTCCTTACATAAAGTAATACATGGATTTTACTGCC
CTGATTCTATCGAAATATGCTGTTTTTTTTATTCGTTTTTATTTATTTTCAATAATTTTT
TTGTAATATAAATGTATAGTCTTTCTCCTTTGTTTTCTCTCGTTCGTTTCCATGTTATCC
AAATATGTTTGTTTGGCCGATAGTCTGTCTTTTGGGAAAAAATGCGCATTTTGTGTTTTT
AAAAGCAGTTTAGAATAGTTTTAAACAAAAAAAGCAATCGTTTTGCCAACATAACGATAT
CATCATTTAGCAACAACTATAATGTTCAAATTATAACCTGATATTGAGTATATAGTAAAT
TAATAAATTAGAATTGTTTTACCTATTAAACGTGATCATTTGTACAGTTTTTCTCAACAC
ATTCACTACAAATATTTCACTGACATCAATCGCTAGGCGCTTTAATATAATTTTTTTGAA
AACTGGAAACATATTTTTAAGTTAAAATAAAATAACTTGCTCAAAAATATCTAACAGTAG
TTGGCAAATAAATAAATAAAAGTTCTTCTTACCCGGATAGACATTTTGATGGAATTATCA
GTTACCTTAAAATGCGTTAACCAAATTAACGTCAAACTAGTATAATACATCGCAATAACC
ATTTAACATATTTCTTCTAGGTAGTAATGAATTACTTCAGTTGACAAAATTTGTGCACTG
TGGCTTTCATGTCAATTTTAGTTTTTTCATTCCTATCGGTTTGCTCATACCATATTTTAA
AAGAATGTTTACTTTTTTTATTTAACCATGATCGATGATTTTTATCTTAACTACTAACAA
GTGGTTTCTTAAATTTATTTGTATTTTCACGTTTGAAGAGCAATTAATTAAATTAACCAA
GTTTGAAATTGAATATAATTTACATATTGACATTTATATCTATGCATAGGGTTCTCTTCA
GTAATCAGTCAACCGCGTTGTCTCAATATCTCACGAAAACTTATTATCCAAATAGTCTAT
CAATACAAGCTTAGCAATCAGTGTTGAAATGAATCATATTACTTCAAACTTTGCAAGTTA
TCTCAACGCTGCTATTATTAAAATTACAATACAATGTATAATATAGATGAAATTTTGAAT
TTCAGAGAGAAAGATGTAATACTACAAAAAGGTACCTCGATTTCCAAAAATACGAGGATA
AACATCCCAAGCACCAAGCTTTGCTCCAGATAGCAAATCTGGATTTATAGAATTTTGAAA
CTGTGCACTTGACCAAAAAGTGTATTGAAATATATGTTAGCTTTCCCTTATCAAAAGTTA
GATACTAACTATTGTCATCTAAAAGTCGGTGAGACTCATTTAGAAACTTCGGCAGGAGAT
TTCCGTGAAAAGATATATCTAGATTTATTAGTGTATCTTGGTCATTTGTCTAGGTATTTT
TTAGGCTTTTTAATGGATTGGTATGAGTAGAACAGATTTTTATGAGAAGGTTGTTCTGAA
TTATAATTTTGTTTTTCTATTTCCAAAATACCGCATCAACACTTATTGTCCAGCTTTGCT
TCCATTTTAAACTTTTGCCTACTTTTACACAACGGTAATGACATAGTAAGTTATGTAGAT
CAATACTTCCTTCCGCTTTTTATAATCAACCCATAGTCTATATATTGTATCGTCGGGTTC
TCATAAAATTGTATTTGCGCTTTTTCTAAAAGCAAAGATCTTTTAAGTTTAACGATTGGA
TTTATAATCAGTTTCTTAAAAAACCAGATGTAAACGATTAATCTCAAAAGCGGTGATTTG
ATTTTTCATACAAAAGAATAGAAATTACTTTAATTACAAATTTAAGAAATTCCACCTTTT
TCTATTATTTGCCGTTCTTCCTTTTTCCTGAGCGACTATTATACTTATAAAAATTTTAAA
GAAAAGGTTATAAGATGGTGGCCAGCTCTTTTACATTAACATGGTAATGATGAATTCATC
TGCATTCTTAAATAATAGAATATAGATGGAAGCATATGAAAACAATCCAATTTTTTGATC
TACTAGCTAAAGAATTTATACTTATTTTCGCAACGTTGCTTATTAAAAAAAGTCAAGAGT
TATACAAATGTATATGCGAATATAAAACATATTACTTCTATATGATTTCTGACTAGATAA
TGTTGGCTGAAATTTTTAAGATGAATTGGAATAATTGCTAAAAATATGAGTAGGTAAAGA
CGTAATGGCGATGACCCTGACACTTCTAAAGCAGGGACAAGTCAATTGATGGTTTGGGGT
CCTGGGCACCAGTACGAACCGTCTAAGTGACTTATCGAAGAATGCTTACAGAAACTTTGT
AGCCTTTGCTCAAATTCACATTTATTTGTCGAGAGAATTGAGTTTCTCGGCAAACCCCAA
ACTCACGATCAACACATACCAATGCAATTTTTACGGATTTACAAACCAAACTTCTTTGTT
TTGTTTGAAGCCAATGTCTATTTTGCAAAATATAAACTCAGAAGCTCTAATTATACCAAC
GTTGAGCTCAAGACAGATTGAATGCAAAATAACCAGTATGATGCAACATCAAAACGCACT
GGCTGTTTCTCTCAAATACCTGATAATTGTATTATGATATAAAATTTAAAATCATACCTG
ATAGTTAAAATTGAAATATTGTAGTAGAATTTAAAAAATCAAGTTAGGTTGTTTAGACAC
CAGTAATTTTATGCTTATATATTATGACATCGTAACTAGACCGTAGATGAGTGACTCCTG
TTCCACATGCTGAGTTGCAGTTATGTATTAAAAAAGACAACCGATGATCATGATAAACTG
TTAAAGCACCTACATCTGTGTTTGATTCGTAATATTCCATCAATAAAGAATAGATATAAA
AGGAAGATTGGGCAAAGTAATTTGGTAAAGGATGCCTATACAGCGATATTTTTTAATGCT
TTAGTTAGGTAAACTTAACAATTTCAGGCTGTGGGTAAGAAGATCCTTAAATAAAACCAT
CACAACAAATATTTAATTCTTTTTAACATACCTGTTAAAAAAAAAACCCCCACTATACAT
TAAAAACCCTAAAGCTGTTCGTAGCAGCATTATAAGACATTTAAATAGAGGATATAATTC
ATGCGAACTCAGGATGTTTAGGGTGAATGGCTTTCTATAATCGAAAGAGCTATACTATTT
ATCCATCAGCTCATCTGCGAACTTGTAAATTATAGGCATTTATAGGACTCGAACCGGGAT
TTATTTACATAATAGTTAAGGGTCGCAAATCGAACCGCTGCTCAATGATAAAGTAGAACC
TTACATTACGTTATATACAAATTAGGGATTATTGTACAACGAAATGTTATTTTACGAATA
ATACTCGTTTAGTCGCAATCTACACTTTAAACCGTAATTAATAATCGCACTAAGCATATT
TTAATTTAGTTGTTTCAGATAAATGCTATTTTTCTGATAGTTTCATCTTTCTTTCTTTTC
TTTTTCTTTTTCTTTTTTAAATTATTTT
>III dna:chromosome chromosome:ASM294v2:III:1:2452883:1
GATCAGCCAAAATGGCTGATCCAGCTATTTAGCAGGTTAAGGTCTCGTTCGTTATCGCAA
TTAAGCAGACAAATCACTCCACCAACTAAGAACGGCCATGCACCACCACCCATAGAATCA
AGAAAGAGCTCTCAATCTGTCAATCCTTACTATGTCTGGACCTGGTGAGTTTCCCCGTGT
TGAGTCAAATTAAGCCGCAGGCTCCACTCCATTGTGGTGCCCTTCCGTCAATTCCTTTAA
GTTTCAGCCTTGCGACCATACTCCCCCCGGAACCCAAAGACTTTGATTTCTCGTAAGGTG
CCGAGCAAGTCGATAAATGAAACATTGCCCGATCCCTAGTCGGCATAGTTTATGGTTAAG
ACTACGACGGTATCTGATCGTCTTCGATCCCCTAACTTTCGTTCTTGATTAATGAAAACA
TCCTTGGCAAATGCTTTCGCAGTAGTTCGTCTTCAATAAATCCAAGAATTTCACCTCTGA
CAATTGAATACGAATGCCCCCGACTATCCCTATTAATCATTACGGCGGTCCTAGAAACCA
ACANAATAGAACCACACGTCCTATTTTATTATTCCATGCTAATGTATTCGAGCAAAACTT
GCCTGCTTTGAACACTCTAATTTTTTCAAGGTAAAAGTCCTGGTTCCCTACCACGCTCAA
TAAAGAACATGAGTAGTTTGCCAGAAGGTTAACGACCCCGGTCATGACCAGTAAACACGC
CTTGCGGCGGACCAGTCGACCAGGCTCAAAGTTCAACTACGAGCTTTTTAACTGCAACAA
CTTTAATATACGCTATTGGAGCTGGAATTACCGCGGCTGCTGGCACCAGACTTGCCCTCC
AATTGTTCCTCGTTAAGGTATTTACATTGTACTCATTCCAATTACAAGACCCGAAAGGGC
CCTGCATTGTTATTTCTTGTCACTACCTCCCCGTGTCGGGATTGGGTAATTTGCGCGCCT
GCTGCCTTCCTTGGATGTGGTAGCCGTTTCTCAGGCTCCCTCTCCGGAATCGAACCCTAA
TTCCCCGTTACCCGTTAAAACCATGGTAGGCCTCTATCCTACCATCGAAAGTTGATAGGG
CAGAAATTTGAATGAACCATCGCCGGCGCAAGGCCATGCGATTCGAAAAGTTATTATGAC
TCACCAAAAAAAGCCCGAAGGCATTGGTTTTTTATCTAATAAATACATCCCTTCCAAAAA
AGTCGGGATTTTTAGCATGTATTAGCTCTAGAATTACCACGGTTATCCAAGTAGTTGAGG
TACTATCAAATAAACGATAACTGATTTAATGAGCCATTCGCAGTTTCACAGTACAAAATT
GCTTATACTTAGACATGCATGGCTTAATCTTTGAGACAAGCATATGACTACTGGCAGGAT
CAACCAGGTAACTATCGTTAGAGGTGAGACAAAAAGCAGAAAAGAAGAAGATAAAAAAAT
GTTTTTTTTTAAAACTTCTTTTTACTTTTCACACACCACTACCGTTTTTAATTTTTTTTC
TTCCCAACAAAATCAGGAAGAAAAAAACAAAAACAAAAGTTACTCAAAGGTGAAACTGAA
AAAAAAAAAAAGAGAAAAGAAAATAAATTCTTCCTAAATTTTTTTTTTACAATTTCCCAT
TATTCCTCAATTAAAAAATTAATTTTATATGAGGTTGTCTAGAGATGAACAACATTTCCT
AGTTCTCTTTTAAAGAACACCGGATATATCGTTTCTCTGAAGACAAGGAAATTGCCAGCT
TGGTATCATAATTTCCTCAGATTTTAGCATTCCAACAAATAAACATTGTTTCCAAAATAT
CATATAAATAGATAAAATTGTACTCCATGTCAAAGTTGAAAATCAAAATCTTCAGAAGTG
GTTCAAACGAAATCAAACCACATAGTTTTTAATAAAAAAAAACTACGGCTGTTGATCTGT
TGTTACCACTAAATGACTTTTTCAGTTCAAATGTTAGTCGAATGACCATACATCCACAGA
AAAAACTCATCGAGTCTCCACAAGACTTCCTCTTTCCATTTTGCAATGGATTCGTGAAGC
GCGGATTCTCCAGCAGGAAAAGAGAAAAGAAAAAATCCTTCAACTCTCCTTTCAAATCTG
CTAAAGGATAGCTAAAAAGTCGGAGTCAAGCACCGTCACGTAGACAACTGCAACTCGCTT
TCCAACTTATCCTTGCGGTATCAAGGTACCGGGTTTGGGGGAAATTACAAATTTTAAAAA
ACCGATTTTACAAAAAAGATGAAACAAAAAAAAAGTTTCCAAAGAGAAAGTCTCCTTTTC
CACTTCTTTTTCCCCTTCTTCTCGTTCAACCTTTTTTCTAAAAATGTAATTTTTAATAAG
AAAAAGAAAAGTATGAAAAAACTTGACGGACCTTCTTTTCATTCTTCTGGACAATCAAAG
ACCGTTACAAAGCAAACAAAAATAAAATAGTAAAATTCTATCTTTCTTTCCAATGCACCG
CGATGCCAACACAAAGAGAAGAATCAAAACAATTTCCATTTTCCCATTTTTTCAATTCTT
AGCAAAAGGAGATTAGCAAGTCTTTACGAAAGTTGAAAAAAAAAATTCCAAATCCAAAAA
AAAAAATAAATAAAAAGTTCCAAAAGCTATTAAAAACTCTTTTTCCTCTTTTCTTTTTTT
TTTCTTTTCATCTTCTTTTTTCTTTTCTCCTTTCAACCACCACTCCTTTTACATAGTTCC
TTGGACCTATTTTTCCTCGATTTTATAGAAACATTTGTGGTTGTGTGAATTTCGTCCATT
TCGGTGCCTATTTCCTATCCTTTCTTCCATATCCCTCCTCTCTCCACCAAAAGTCCTACT
ACTACCACCAGAAAACTATCCACCACACAAAATCCCACTACTCCCTCCTTACTTCTCCTT
ATTCAACGTTCAAATACAAACGAAAAGAAAAAGAAAAACACCATACGAAAATCTCTTTAT
TCTTTATTTGTTTGTTGAAACCCCTTTTTTCTTTTTTCATCTTTCGTATCTTTTCCCTTT
TTTCCTCTTATTTTATCTTTTCTTTCTTTTCTTTTTTTTATTTGTATTGATTCTTATTTC
TCTCATTTTCCATTGAACCATACTCCATTCCCTACCTACAACTACCCCTTCCCACACCCA
TCTCTGACTCTACCGACCCTGAAAAATTTAAAGTCCCACCCCTCTCCACCTACTCTATTC
CGTTTTTTTCATATTAAAATTGGCTTTTCAATAAATATTGTTTTGTTAAATTATAAATTA
AATTTTTCTTTATTTTTTCATAAATTTTTCATTTCCATTTTCTTTTGTTTTTCATGCTTT
CCTCACATGTTTTGTATCGAAAAATTTGCATTTTTATGTTCCATCCCATATTTCGCACGA
TTTTCAATACCTTTGTAGTTGTTTTTTTGTTTTCTTATTTTTTCTTTTATTTGTTTGCAC
TTTTTTTGTTTTTTCCATTTTGTTTTTGAAAAATGTTGGGAATGTGTAGTGTATTATGTT
TATGTTATTTTGTAAATACTTGAATGTCATGAAAATCGAAAATTACAAAGTTGGTCAACC
AAGCTCATTTTCATTATAAAACATTACTTTTGGTTAAATTATATAAAATGTATTTATTTA
TTTTGTAAAAATCCTACAAATTACCTTGTTTTTTTCATTTTTTCTCTCCACCTTCCCATA
ACATGCCCCACCCTTCCCCAAGGAAAACACACTCTAAATGCATTTTTTTTGCACTCTGGC
TTCAGCTACATGGATGTTTATTACTCAAAATTGTAAAAGAAATGCATCTCATCTATTTCC
TCTAAATTATCTATTTTCTTCCTCCATACAACTACCTCTACTCCCTCTTTCACTTTTCAA
CTTTTGACCCATTTGCCTGTCGATCTTTTTCATTCTTGTAAATTCACAGAACAAAACCAA
ACACTTGAGCCTCATGATGTGTTCAACACGTGATAAAGGACCTATCGAATTTCGTAAAGA
TGAAAATTTTCCTTTCGAATGACTGTTTTTGCATTCCAGCCTTCTCCATTTCACCACCAG
ACTCATCTTTACACCCGCTTCATCAGTCTTAGACAAGTAACATCGTTACTTTTTGCCAGA
TCCAGCCACGCATACCTGACCTAAATGTGGTTTGATGAAAAAAATTTTTTTTTGTTTCTT
TTGAAAATGTTGGATATTGTGCATATGTAACCGCACCAAAATTTTCCACATATTTGGTCA
AGAAATTGAACATTCTTCTACGTCATGTTTGGTGATATTTTGGGGTTCTATACCAGCCAT
TTTCGATGTTTCTTTTGTTGTTTGAAAAAAATAAAAATAAAAATAAAAATAATAAATAAA
AGGTGGGTTCATTAAGAATACAAATAAAAACAACAATAAATAAATAATAAAGAAAAACCA
TTACAGTTACAGATTTCAAAAGTAAAAACATAACAACATTGGATCCCTTTTCCACCCGTT
ATTTCCTCACAAAATACATATTGTTACTCTCAATCCATCCATCAAACTTTATACTATTTT
TAAAAATAAATTAACCTCGTGATAATTTTGTCCATTTTCCACATTTGGAAACAACTTTCT
GTTTTTATGTTACTACACTACTATATATTATGTACTTTTTCATCCGTGTTAAAGTAACCA
CCATTCCATCATGATATCCTCATTATCACCATATCCATATCCAATGTAACCGTAACCATG
AAAAATATGACACACCAAAAAAAAAGGAAACCCAACCTGTTGTAACCAATTTTTTTTTTT
TTTTTTTTTTTTTTTTTACACTTTTAACCACATTTACCAACCTTATACTCTCTCTCTCTA
TCTCTCACACACAAGTAACCATGTAACCAACCCTAATAATCAATACAAATGTAACCCTCA
TTAAAAATATTACAAAACATAAATAAATATTACAAAACATAATATATATCTATTATATCT
ATTTTCTTTTCTTTTCTTTTCTCTTATTGGTCTTTTTTTTTTTAAAACTATATGCTATTG
TTCTTTTAACGTACTTTTAACTTTGTTTATCTTGTTTCTGCTTTATTCTAATTTATCATT
TTCCTTTTTTTTTTTACTGTTCTAAACTACTTTGCGTACTTTTTTTTTACTTTACCGTCT
TTTATTATTTTAACACGCTTGGTTTGTTTGTAAAACTGTTATTCATTCTTAAGCTTTTTA
AAATCTATGACATTACGTTAAACTTCAATAATGAATTCTTCTTTCACATCTCCTTCCAAT
GTCCAAAAATGTTCTCCTCAGTAAATAATGGTTAGCGTGTGTGTGTGTGTGTGTGTTGTG
CGCATTTGTTTACAAATGGAACTTGAAATTTGAAAAGGGGGAACCACCAAGATAGCTCCT
TGCACTGCGTTAAATCCCTCTCCTATTTTGACAATTCCAACTCACCAACTCATTTTCAAG
GTCTTTTTTTTTTTTTTTTTTTACGATTCACGACCTACCTTACCACTTATCTTACCTACC
TACCTACTACTACCTACCATACCTACTACCTATGAACTACTTACTACTACTACTACCTAC
AAAAAAAAAAACTTTGGTTGAATATTTTTTTTACTAGGATTTGTGCATTACCCTTACCTC
TTTTCCCTTCAAAAAGTTTTTACTTTTCCACAAAATTGGGTATTGGGTATTGAGTATTTT
CCCACCAATTCCTAATACTAATACTACTACTACTACTAATACCCCCCCTACTACAAAAAA
AAGTTGTCTGCGTGTGTGGACTTTGAATTTATTTTTTCTTCAAAAGTGCATTACCCTTAC
CTTTTATCTCTTCAAAATATTTCAAAGGTATAAATATACTATATACTCTTTATATATATT
ATAGGGAAAAAGTTCAGACCAAAAAAAAAATCGACTCGCTCGACTTTTTCTTCTCTCTCC
CTCTTCTTCCCCCTTCCCCCTTCCTCCTCTCCTCCTTCTTCTTCTTCATCTCTTCTTTCT
TTCTTTCCTCCAATTTTTCTCTTCGAATTAGCAAGTCTTTAATTTTTTGCCTACCAACAA
GAAGAGAAAAATGAAAGAAATAAGATGATGGTTCCTTAATGGAACAAATCTTGGGAACAA
AGGCTTAATCTCAGCAGATCGTAACAACAAGGCTACTCTACTGCTTACAATACCCCGTTC
CACATTAAAGTCGTATGCAATGGATTCGATTCCGCACAAGATTTCAATGGAATTTCATGG
ACAAGTCAATAAAACACTTCCGTTTCATCAACCATCGCCCATCTTCTACGATACAGGAGA
GTAGGAACAAGTCCTACCTCTATTTTTATACATATAAATCATGCGGACCAAAAAATCGTC
GCTTTCTGGCACGGATTCTGGCTTAGAGGCGTTCAGCCGTTATCCGGCAGATGATAGCTC
CGCGGCATTGCCTTGTCAGGCAGCCGCAAATACCAATGATCTGAATCAACGGTTCCTCTC
GTACTAAGTTGAATTACCATTGCGACGACACTTCATCAGTAGGGTAAAACTAACCTGTCT
CACGACGGTCTAAACCCAGCTCACGTTCCCTATTAGTGGGTGAACAATCCAACGCTTACC
GAATTCTGCTTCGGTATGATAGGAAGAGCCGACATCGAAGAATCAAAAAGCAACGTCGCT
ATGAACGCTTGGCTGCCACAAGCCAGTTATCCCTGTGGTAACTTTTCTGGCACCTCTGTC
CTCAAATTTCGAGGGAACAAAGGATCGATAGGCCACACTTTCATGGTTTGTATTCACACT
GAAAATCAAAATCAAGGGGACTTTTACCCTTTTATTCTACTCGAGATTTCTGTTCTCGAT
GAGTCCCCCTTAGGACACCTGCGTTATCTTTTAACAGATGTGCCGCCCCAGCCAAACTCC
CCACCTGACAATGTCATCAACGCGGATCAGTTCGCGAAGAAACTTTAACGCTAGAATATG
GGAAATAAATCCCAATTCCGCTTCATTGATTAAGTAAAGAAACGATAAAGGTAGTGGTAT
TTCACCGGCGTATGCCGAAACATACTCCCACTTATCCTACACCCTCTATGTCTCTTCACA
ATGTCAAACTAGAGTCAAGCTCAACAGGGTCTTCTTTCCCCGCTGATTTTGCCTGGCCCG
TTCCCCAGGCTGTGGTTTCGCTAGATAGTAGATAGGGACAGTGGGAATCTCGTTAATCCA
TTCATGCGCGTCACTAGTTAGATGACGAGGCATTTGGCTACCTTAAGAGAGTCATAGTTA
CTCCCGCCGTTTACCCGCGCTTGGTTGAATTTCTTCACTTTGACATTCAGAGCACTGGGC
AGAAATCACATTGCGTCAACACCACTTTCTGGCCATCGCAATGCTATGTTTTAATTAGAC
AGTCAGATTCCCCTTGTCCGTACCAGTTCTAAGTTGGTTGTTAAACGTACGCCAGTAAGA
GCATAATCCCCGAGAAGGAGAAAAGCCCGACCAAGGACTTCCCGGCCGCCAAGGTCCAAG
CAGGTCCAACATCCCTTCTCACCCCGAAAGGCGAGAAAAGACATCGGTCCACGCTCAGTC
CAGCAACCGTTCAGGTTCCAAGGCCCAACGTACCCAACCCTTAGAGCCAATCCTTATCCC
GAAGTTACGGATCCATTTTGCCGACTTCCCTTATCTACATTGTTCTATCAACTAGAGGCT
GTTCACCTTGGAGACCTGCTGCGGTTATGAGTACGACCAGATGTGAAAACAAGGACCCGA
AGGTCCATTCTTCCGTTGGATTTTCAAGGGCCGTCGAGAGCGCACCGGATTCAGCATGAG
GCGCTGAACTCTTCCAAACACCATACCCTAGCTCCGGATAAACCGATTTCAGGGTAGTTC
AATGGTTTGTTAAAAAGAAAAGAGAACTCTTCCCAGGGCTCCCGCCGACGTCTCCAACTT
CATTTACGTTGCCGTGTTGATTCCACCTTCTGGTTCCGGAATATTAACCGGATTCCCTTT
CGATAGGAGGCACGAAAAATCGTGCAACTTTCATACGGAGCTTCCCTATCTCTTAGGATC
GACTAACCCATGTCCAACTGCTGTTCACATGGAACCTTTCCCCACTTCAGTCTTCAAAGT
TCTCATTTGAATATTTGCTACTTCCACCAAGATCTGCACTAGAGGCTGTTCGACCCAGGC
TCACGCCCAAGGCTTCGTCACAAACCTCCACGCCTGCCTACTCGTCTGAGCTTCTCAAAG
CTAACCCAGACGGTGAGGTATGGGTAGTACGCTTAAGCGCCATCCATTTTCAGGGCTAGT
TCATTCGGCAGGTGAGTTGTTACACACTCCTTAGCGGATTCCGACTTCCATGGCCACCGT
CCTGCTGTCTAGATGAACTAACACCTTTTCTGGTGTCTGATGAGCGTACATTCCGGCACC
TTAACCTCACGTTCGGTTCATCCCGCATCGCCAGTTCTGCTTACCAAAAATGGCCCACTA
GAAACTCTCATTCGATGGCCCACGTCCAATTAAGCGACAAGGGCGTCTTACATATTTAAA
GTTTGAGAATAGGTTGAGGAAATTCCTTCCCCAAGACCTCTAATCATTCGCTTTACCTCA
TAAAACTGATCTGAGTTTCTGCTATCCTGAGGGAAACTTCGGCAGGAACCAGCTACTAGA
TGGTTCGATTAGTCTTTCGCCCCTATACCCAAATTTGAAGATCGATTTGCACGTCAGAAT
CTCTACGAGCCTCCACCAGAGTTTCCTCTGGCTTCACCCTATTCAGGCATAGTTCACCAT
CTTTCGGGTCCCAACAGCTATGCTCTTACTCAAACCCTTCCATTGACAAACTTCCGGGTC
GGTCGATGGTGCACGCCACAAGGGCGTTCCCACCTGCATTCACTTTCATTTCGCGGATGG
GTTTTCATCACCCAAACACTCGCATAGATGCTAGACTCCTTGGTCCGTGTTTCAAGACGG
GCCATTGAAAACCATTATGTCAGCATCCTTGGCACGAAGCCGCAGTCCTCAGTCCCCAGT
GGACGTATTACAACAAGGGCTATAAACACTCCCCAGGCAGAACCCGGAAAGCCACCTTCC
CTTATTCTTTTTCCGCCCCCGAAAACTGATGCTGACCTACCACAGGTTCAGAGTGCATAG
TCTCGCGAAGAGACTACTGATCTCACCCAGGTAAGACTGATTTCCAATGCTTCCCTTTCA
GCAATTTCACGTACTATTTAACTCTCTTTTCAAAGTTCTTTTCATCTTTCGATCACTCTA
CTTGTTCGCTATCGGTCTCTCGCCAATATTTAGCTTTAGATGAAATTTACCACCCATTTA
GAGCTGCATTCCCAAACAACTCGACTCTTCGAAAGCGCTTTATATGGCATATCCAATCGA
CCAAAGACGGGGTTCTCACCCTCTCTGACGTCCTGTTCCAAGGAACTTAGACCGATCGTC
TACACTCAAAGCAGCTTCTTGAAATTACAACTCGGACAACAAAAGAAATGTTGCCAGATT
TCAAATTTGAGCTTTTCCCGCTTCACTCGCCGTTACTGAGGGAATCATGGTTATTTTCTT
TTCCTGCGCTTATTGATATGCTTAAGTTCAGCGCGTAGTCCTACCTGATTTGAGGTCAAA
TAAAAAAGGTACTGTGAAAAAAAAATAACTTTTTTTTTCGTTAAGGTTCAAATATAAAAG
AGATTAAAACTTTTTAGTTATTTTTCTTTCCTAATTTCTTTTTTTCTATCAAACAAAGTG
GTAAAACCTATTACGTTCAATAGAAAAAAAAATGAAAAAAGGCATAGAAAAATAATTTCA
ATCTTCCTTTTGTTTTCACCAATCGATTTCAAACTAAATTTATATTTTAAAAAAAAAACA
AATTTTCGTTCAACACCTCATCAAAAATATTTAAAAAAAACATTTTTTGTGAGAAGATTG
TAATGACACTCAAACAGGCATGCCTTTGGTAGAACCCAAAGGCGCAATGTGCGTTCAAAG
ATTCGATGATTCACGGAATTCTGCAATTCACATTACGTATCGCATTTCGCTGCGTTCTTC
ATCGATGCGAGAGCCAAGAGATCCGTTGCTGAAAGTTTTAAATAATTTTATATATTAGAT
ATAATTAATTCAGACTTCAAAAACAAATTTCAAGGTTTATAATTTAATTTTGCTTCTTTT
CCAATTTCCTTATATTTAAAAAAAAAGAGAAAGAATAGAAAAATGATAAAATAAAATAAA
ATAGTAAAAAAGTAATGATATGCTTGGCATGCAACAAAAACACACCAAACAAAAATCATC
CACTCGTAATATTTACAATTTCATTTTTTTTTTCATCTTTTCTCTTTTCTAAACACTTTT
TTTTAATAAAAAAATATAAAGAAAAAGAAAAAAAATCAAAATTGAAAATATTTTACATTT
TCACAGAAAGGTAAATGGATAAGAGAAGAAAAAGGTAAAAAAAATTCCCAAAAAGTTAAA
AGATGGAAATTTTTTAAAACCTTTTCATATAACTTTTCTAATGATCCTTCCGCAGGTTCA
CCTACGGAAACCTTGTTACGACTTTTACTTCCTCTAAATGACCAAGTTTGTCCAACTTCT
CGGCAATGTTTCCGCCGTTGCCAGCAGAAACAAGCCAATCCAGAGGCCTCACTAAGCCAT
TCAATCGGTAGTAGCGACGGGCGGTGTGTACAAAGGGCAGGGACGTATTCAACGCAAGCT
GATGACTTGCGCTTACTAGGAATTCCTCGTTGAAGAGCAATAATTGCAATGCTCTATCCC
CAGCACGACGGAGTTTAACAAGATTACCCAGACCTTCCGGCCAAGGATAAAAAATCAAAA
GATTTTTTTCAACTCGTTGGCTCCGTCAGTGTAGCGCGCGTGCGGCCCAGAACATCTAAG
GGCATCACAGACCTGTTATTGCCTCAAACTTCCATTGGCTTTATGCCAATAGTCCCTCTA
AGAAGCTAATGATCAGCCAAAATGGCTGATCCAGCTATTTAGCAGGTTAAGGTCTCGTTC
GTTATCGCAATTAAGCAGACAAATCACTCCACCAACTAAGAACGGCCATGCACCACCACC
CATAGAATCAAGAAAGAGCTCTCAATCTGTCAATCCTTACTATGTCTGGACCTGGTGAGT
TTCCCCGTGTTGAGTCAAATTAAGCCGCAGGCTCCACTCCATTGTGGTGCCCTTCCGTCA
ATTCCTTTAAGTTTCAGCCTTGCGACCATACTCCCCCCGGAACCCAAAGACTTTGATTTC
TCGTAAGGTGCCGAGCAAGTCGATAAATGAAACATTGCCCGATCCCTAGTCGGCATAGTT
TATGGTTAAGACTACGACGGTATCTGATCGTCTTCGATCCCCTAACTTTCGTTCTTGATT
AATGAAAACATCCTTGGCAAATGCTTTCGCAGTAGTTCGTCTTCAATAAATCCAAGAATT
TCACCTCTGACAATTGAATACGAATGCCCCCGACTATCCCTATTAATCATTACGGCGGTC
CTAGAAACCAACAAAATAGAACCACACGTCCTATTTTATTATTCCATGCTAATGTATTCG
AGCAAAACTTGCCTGCTTTGAACACTCTAATTTTTTCAAGGTAAAAGTCCTGGTTCCCTA
CCACGCTCAATAAAGAACATGAGTAGTTTGCCAGAAGGTTAACGACCCCGGTCATGACCA
GTAAACACGCCTTGCGGCGGACCAGTCGACCAGGCTCAAAGTTCAACTACGAGCTTTTTA
ACTGCAACAACTTTAATATACGCTATTGGAGCTGGAATTACCGCGGCTGCTGGCACCAGA
CTTGCCCTCCAATTGTTCCTCGTTAAGGTATTTACATTGTACTCATTCCAATTACAAGAC
CCGAAAGGGCCCTGCATTGTTATTTCTTGTCACTACCTCCCCGTGTCGGGATTGGGTAAT
TTGCGCGCCTGCTGCCTTCCTTGGATGTGGTAGCCGTTTCTCAGGCTCCCTCTCCGGAAT
CGAACCCTAATTCCCCGTTACCCGTTAAAACCATGGTAGGCCTCTATCCTACCATCGAAA
GTTGATAGGGCAGAAATTTGAATGAACCATCGCCGGCGCAAGGCCATGCGATTCGAAAAG
TTATTATGACTCACCAAAAAAAGCCCGAAGGCATTGGTTTTTTATCTAATAAATACATCC
CTTCCAAAAAAGTCGGGATTTTTAGCATGTATTAGCTCTAGAATTACCACGGTTATCCAA
GTAGTTGAGGTACTATCAAATAAACGATAACTGATTTAATGAGCCATTCGCAGTTTCACA
GTACAAAATTGCTTATACTTAGACATGCATGGCTTAATCTTTGAGACAAGCATATGACTA
CTGGCAGGATCAACCAGGTAACTATCGTTAGAGGTGAGACAAAAAGCAGAAAAGAAGAAG
ATAAAAAAATGTTTTTTTTTAAAACTTCTTTTTACTTTTCACACACCACTACCGTTTTTA
ATTTTTTTTCTTCCCAACAAAATCAGGAAGAAAAAAACAAAAACAAAAGTTACTCAAAGG
TGAAACTGAAAAAAAAAAAAAGAGAAAAGAAAATAAATTCTTCCTAAATTTTTTTTTTAC
AATTTCCCATTATTCCTCAATTAAAAAATTAATTTTATATGAGGTTGTCTAGAGATGAAC
AACATTTCCTAGTTCTCTTTTAAAGAACACCGGATATATCGTTTCTCTGAAGACAAGGAA
ATTGCCAGCTTGGTATCATAATTTCCTCAGATTTTAGCATTCCAACAAATAAACATTGTT
TCCAAAATATCATATAAATAGATAAAATTGTACTCCATGTCAAAGTTGAAAATCAAAATC
TTCAGAAGTGGTTCAAACGAAATCAAACCACATAGTTTTTAATAAAAAAAAACTACGGCT
GTTGATCTGTTGTTACCACTAAATGACTTTTTCAGTTCAAATGTTAGTCGAATGACCATA
CATCCACAGAAAAAACTCATCGAGTCTCCACAAGACTTCCTCTTTCCATTTTGCAATGGA
TTCGTGAAGCGCGGATTCTCCAGCAGGAAAAGAGAAAAGAAAAAATCCTTCAACTCTCCT
TTCAAATCTGCTAAAGGATAGCTAAAAAGTCGGAGTCAAGCACCGTCACGTAGACAACTG
CAACTCGCTTTCCAACTTATCCTTGCGGTATCAAGGTACCGGGTTTGGGGGAAATTACAA
ATTTTAAAAAACCGATTTTACAAAAAAGATGAAACAAAAAAAAAGTTTCCAAAGAGAAAG
TCTCCTTTTCCACTTCTTTTTCCCCTTCTTCTCGTTCAACCTTTTTTCTAAAAATGTAAT
TTTTAATAAGAAAAAGAAAAGTATGAAAAAACTTGACGGACCTTCTTTTCATTCTTCTGG
ACAATCAAAGACCGTTACAAAGCAAACAAAAATAAAATAGTAAAATTCTATCTTTCTTTC
CAATGCACCGCGATGCCAACACAAAGAGAAGAATCAAAACAATTTCCATTTTCCCATTTT
TTCAATTCTTAGCAAAAGGAGATTAGCAAGTCTTTACGAAAGTTGAAAAAAAAAATTCCA
AATCCAAAAAAAAAAATAAATAAAAAGTTCCAAAAGCTATTAAAAACTCTTTTTCCTCTT
TTCTTTTTTTTTTCTTTTCATCTTCTTTTTTCTTTTCTCCTTTCAACCACCACTCCTTTT
ACATAGTTCCTTGGACCTATTTTTCCTCGATTTTATAGAAACATTTGTGGTTGTGTGAAT
TTCGTCCATTTCGGTGCCTATTTCCTATCCTTTCTTCCATATCCCTCCTCTCTCCACCAA
AAGTCCTACTACTACCACCAGAAAACTATCCACCACACAAAATCCCACTACTCCCTCCTT
ACTTCTCCTTATTCAACGTTCAAATACAAACGAAAAGAAAAAGAAAAACACCATACGAAA
ATCTCTTTATTCTTTATTTGTTTGTTGAAACCCCTTTTTTCTTTTTTCATCTTTCGTATC
TTTTCCCTTTTTTCCTCTTATTTTATCTTTTCTTTCTTTTCTTTTTTTTATTTGTATTGA
TTCTTATTTCTCTCATTTTCCATTGAACCATACTCCATTCCCTACCTACAACTACCCCTT
CCCACACCCATCTCTGACTCTACCGACCCTGAAAAATTTAAAGTCCCACCCCTCTCCACC
TACTCTATTCCGTTTTTTTCATATTAAAATTGGCTTTTCAATAAATATTGTTTTGTTAAA
TTATAAATTAAATTTTTCTTTATTTTTTCATAAATTTTTCATTTCCATTTTCTTTTGTTT
TTCATGCTTTCCTCACATGTTTTGTATCGAAAAATTTGCATTTTTATGTTCCATCCCATA
TTTCGCACGATTTTCAATACCTTTGTAGTTGTTTTTTTGTTTTCTTATTTTTTCTTTTAT
TTGTTTGCACTTTTTTTGTTTTTTCCATTTTGTTTTTGAAAAATGTTGGGAATGTGTAGT
GTATTATGTTTATGTTATTTTGTAAATACTTGAATGTCATGAAAATCGAAAATTACAAAG
TTGGTCAACCAAGCTCATTTTCATTATAAAACATTACTTTTGGTTAAATTATATAAAATG
TATTTATTTATTTTGTAAAAATCCTACAAATTACCTTGTTTTTTTCATTTTTTCTCTCCA
CCTTCCCATAACATGCCCCACCCTTCCCCAAGGAAAACACACTCTAAATGCATTTTTTTT
GCACTCTGGCTTCAGCTACATGGATGTTTATTACTCAAAATTGTAAAAGAAATGCATCTC
ATCTATTTCCTCTAAATTATCTATTTTCTTCCTCCATACAACTACCTCTACTCCCTCTTT
CACTTTTCAACTTTTGACCCATTTGCCTGTCGATCTTTTTCATTCTTGTAAATTCACAGA
ACAAAACCAAACACTTGAGCCTCATGATGTGTTCAACACGTGATAAAGGACCTATCGAAT
TTCGTAAAGATGAAAATTTTCCTTTCGAATGACTGTTTTTGCATTCCAGCCTTCTCCATT
TCACCACCAGACTCATCTTTACACCCGCTTCATCAGTCTTAGACAAGTAACATCGTTACT
TTTTGCCAGATCCAGCCACGCATACCTGACCTAAATGTGGTTTGATGAAAAAAATTTTTT
TTTGTTTCTTTTGAAAATGTTGGATATTGTGCATATGTAACCGCACCAAAATTTTCCACA
TATTTGGTCAAGAAATTGAACATTCTTCTACGTCATGTTTGGTGATATTTTGGGGTTCTA
TACCAGCCATTTTCGATGTTTCTTTTGTTGTTTGAAAAAAATAAAAATAAAAATAAAAAT
AATAAATAAAAGGTGGGTTCATTAAGAATACAAATAAAAACAACAATAAATAAATAATAA
AGAAAAACCATTACAGTTACAGATTTCAAAAGTAAAAACATAACAACATTGGATCCCTTT
TCCACCCGTTATTTCCTCACAAAATACATATTGTTACTCTCAATCCATCCATCAAACTTT
ATACTATTTTTAAAAATAAATTAACCTCGTGATAATTTTGTCCATTTTCCACATTTGGAA
ACAACTTTCTGTTTTTATGTTACTACACTACTATATATTATGTACTTTTTCATCCGTGTT
AAAGTAACCACCATTCCATCATGATATCCTCATTATCACCATATCCATATCCAATGTAAC
CGTAACCATGAAAAATATGACACACCAAAAAAAAAGGAAACCCAACCTGTTGTAACCAAT
TTTTTTTTTTTTTTTTTTTTTTTTTTTACACTTTTAACCACATTTACCAACCTTATACTC
TCTCTCTCTATCTCTCACACACAAGTAACCATGTAACCAACCCTAATAATCAATACAAAT
GTAACCCTCATTAAAAATATTACAAAACATAAATAAATATTACAAAACATAATATATATC
TATTATATCTATTTTCTTTTCTTTTCTTTTCTCTTATTGGTCTTTTTTTTTTTAAAACTA
TATGCTATTGTTCTTTTAACGTACTTTTAACTTTGTTTATCTTGTTTCTGCTTTATTCTA
ATTTATCATTTTCCTTTTTTTTTTTACTGTTCTAAACTACTTTGCGTACTTTTTTTTTAC
TTTACCGTCTTTTATTATTTTAACACGCTTGGTTTGTTTGTAAAACTGTTATTCATTCTT
AAGCTTTTTAAAATCTATGACATTACGTTAAACTTCAATAATGAATTCTTCTTTCACATC
TCCTTCCAATGTCCAAAAATGTTCTCCTCAGTAAATAATGGTTAGCGTGTGTGTGTGTGT
GTGTGTTGTGCGCATTTGTTTACAAATGGAACTTGAAATTTGAAAAGGGGGAACCACCAA
GATAGCTCCTTGCACTGCGTTAAATCCCTCTCCTATTTTGACAATTCCAACTCACCAACT
CATTTTCAAGGTCTTTTTTTTTTTTTTTTTTTACGATTCACGACCTACCTTACCACTTAT
CTTACCTACCTACCTACTACTACCTACCATACCTACTACCTATGAACTACTTACTACTAC
TACTACCTACAAAAAAAAAAACTTTGGTTGAATATTTTTTTTACTAGGATTTGTGCATTA
CCCTTACCTCTTTTCCCTTCAAAAAGTTTTTACTTTTCCACAAAATTGGGTATTGGGTAT
TGAGTATTTTCCCACCAATTCCTAATACTAATACTACTACTACTACTAATACCCCCCCTA
CTACAAAAAAAAGTTGTCTGCGTGTGTGGACTTTGAATTTATTTTTTCTTCAAAAGTGCA
TTACCCTTACCTTTTATCTCTTCAAAATATTTCAAAGGTATAAATATACTATATACTCTT
TATATATATTATAGGGAAAAAGTTCAGACCAAAAAAAAAATCGACTCGCTCGACTTTTTC
TTCTCTCTCCCTCTTCTTCCCCCTTCCCCCTTCCTCCTCTCCTCCTTCTTCTTCTTCATC
TCTTCTTTCTTTCTTTCCTCCAATTTTTCTCTTCGAATTAGCAAGTCTTTAATTTTTTGC
CTACCAACAAGAAGAGAAAAATGAAAGAAATAAGATGATGGTTCCTTAATGGAACAAATC
TTGGGAACAAAGGCTTAATCTCAGCAGATCGTAACAACAAGGCTACTCTACTGCTTACAA
TACCCCGTTCCACATTAAAGTCGTATGCAATGGATTCGATTCCGCACAAGATTTCAATGG
AATTTCATGGACAAGTCAATAAAACACTTCCGTTTCATCAACCATCGCCCATCTTCTACG
ATACAGGAGAGTAGGAACAAGTCCTACCTCTATTTTTATACATATAAATCATGCGGACCA
AAAAATCGTCGCTTTCTGGCACGGATTCTGGCTTAGAGGCGTTCAGCCGTTATCCGGCAG
ATGATAGCTCCGCGGCATTGCCTTGTCAGGCAGCCGCAAATACCAATGATCTGAATCAAC
GGTTCCTCTCGTACTAAGTTGAATTACCATTGCGACGACACTTCATCAGTAGGGTAAAAC
TAACCTGTCTCACGACGGTCTAAACCCAGCTCACGTTCCCTATTAGTGGGTGAACAATCC
AACGCTTACCGAATTCTGCTTCGGTATGATAGGAAGAGCCGACATCGAAGAATCAAAAAG
CAACGTCGCTATGAACGCTTGGCTGCCACAAGCCAGTTATCCCTGTGGTAACTTTTCTGG
CACCTCTGTCCTCAAATTTCGAGGGAACAAAGGATCGATAGGCCACACTTTCATGGTTTG
TATTCACACTGAAAATCAAAATCAAGGGGACTTTTACCCTTTTATTCTACTCGAGATTTC
TGTTCTCGATGAGTCCCCCTTAGGACACCTGCGTTATCTTTTAACAGATGTGCCGCCCCA
GCCAAACTCCCCACCTGACAATGTCATCAACGCGGATCAGTTCGCGAAGAAACTTTAACG
CTAGAATATGGGAAATAAATCCCAATTCCGCTTCATTGATTAAGTAAAGAAACGATAAAG
GTAGTGGTATTTCACCGGCGTATGCCGAAACATACTCCCACTTATCCTACACCCTCTATG
TCTCTTCACAATGTCAAACTAGAGTCAAGCTCAACAGGGTCTTCTTTCCCCGCTGATTTT
GCCTGGCCCGTTCCCCAGGCTGTGGTTTCGCTAGATAGTAGATAGGGACAGTGGGAATCT
CGTTAATCCATTCATGCGCGTCACTAGTTAGATGACGAGGCATTTGGCTACCTTAAGAGA
GTCATAGTTACTCCCGCCGTTTACCCGCGCTTGGTTGAATTTCTTCACTTTGACATTCAG
AGCACTGGGCAGAAATCACATTGCGTCAACACCACTTTCTGGCCATCGCAATGCTATGTT
TTAATTAGACAGTCAGATTCCCCTTGTCCGTACCAGTTCTAAGTTGGTTGTTAAACGTAC
GCCAGTAAGAGCATAATCCCCGAGAAGGAGAAAAGCCCGACCAAGGACTTCCCGGCCGCC
AAGGTCCAAGCAGGTCCAACATCCCTTCTCACCCCGAAAGGCGAGAAAAGACATCGGTCC
ACGCTCAGTCCAGCAACCGTTCAGGTTCCAAGGCCCAACGTACCCAACCCTTAGAGCCAA
TCCTTATCCCGAAGTTACGGATCCATTTTGCCGACTTCCCTTATCTACATTGTTCTATCA
ACTAGAGGCTGTTCACCTTGGAGACCTGCTGCGGTTATGAGTACGACCAGATGTGAAAAC
AAGGACCCGAAGGTCCATTCTTCCGTTGGATTTTCAAGGGCCGTCGAGAGCGCACCGGAT
TCAGCATGAGGCGCTGAACTCTTCCAAACACCATACCCTAGCTCCGGATAAACCGATTTC
AGGGTAGTTCAATGGTTTGTTAAAAAGAAAAGAGAACTCTTCCCAGGGCTCCCGCCGACG
TCTCCAACTTCATTTACGTTGCCGTGTTGATTCCACCTTCTGGTTCCGGAATATTAACCG
GATTCCCTTTCGATAGGAGGCACGAAAAATCGTGCAACTTTCATACGGAGCTTCCCTATC
TCTTAGGATCGACTAACCCATGTCCAACTGCTGTTCACATGGAACCTTTCCCCACTTCAG
TCTTCAAAGTTCTCATTTGAATATTTGCTACTTCCACCAAGATCTGCACTAGAGGCTGTT
CGACCCAGGCTCACGCCCAAGGCTTCGTCACAAACCTCCACGCCTGCCTACTCGTCTGAG
CTTCTCAAAGCTAACCCAGACGGTGAGGTATGGGTAGTACGCTTAAGCGCCATCCATTTT
CAGGGCTAGTTCATTCGGCAGGTGAGTTGTTACACACTCCTTAGCGGATTCCGACTTCCA
TGGCCACCGTCCTGCTGTCTAGATGAACTAACACCTTTTCTGGTGTCTGATGAGCGTACA
TTCCGGCACCTTAACCTCACGTTCGGTTCATCCCGCATCGCCAGTTCTGCTTACCAAAAA
TGGCCCACTAGAAACTCTCATTCGATGGCCCACGTCCAATTAAGCGACAAGGGCGTCTTA
CATATTTAAAGTTTGAGAATAGGTTGAGGAAATTCCTTCCCCAAGACCTCTAATCATTCG
CTTTACCTCATAAAACTGATCTGAGTTTCTGCTATCCTGAGGGAAACTTCGGCAGGAACC
AGCTACTAGATGGTTCGATTAGTCTTTCGCCCCTATACCCAAATTTGAAGATCGATTTGC
ACGTCAGAATCTCTACGAGCCTCCACCAGAGTTTCCTCTGGCTTCACCCTATTCAGGCAT
AGTTCACCATCTTTCGGGTCCCAACAGCTATGCTCTTACTCAAACCCTTCCATTGACAAA
CTTCCGGGTCGGTCGATGGTGCACGCCACAAGGGCGTTCCCACCTGCATTCACTTTCATT
TCGCGGATGGGTTTTCATCACCCAAACACTCGCATAGATGCTAGACTCCTTGGTCCGTGT
TTCAAGACGGGCCATTGAAAACCATTATGTCAGCATCCTTGGCACGAAGCCGCAGTCCTC
AGTCCCCAGTGGACGTATTACAACAAGGGCTATAAACACTCCCCAGGCAGAACCCGGAAA
GCCACCTTCCCTTATTCTTTTTCCGCCCCCGAAAACTGATGCTGACCTACCACAGGTTCA
GAGTGCATAGTCTCGCGAAGAGACTACTGATCTCACCCAGGTAAGACTGATTTCCAATGC
TTCCCTTTCAGCAATTTCACGTACTATTTAACTCTCTTTTCAAAGTTCTTTTCATCTTTC
GATCACTCTACTTGTTCGCTATCGGTCTCTCGCCAATATTTAGCTTTAGATGAAATTTAC
CACCCATTTAGAGCTGCATTCCCAAACAACTCGACTCTTCGAAAGCGCTTTATATGGCAT
ATCCAATCGACCAAAGACGGGGTTCTCACCCTCTCTGACGTCCTGTTCCAAGGAACTTAG
ACCGATCGTCTACACTCAAAGCAGCTTCTTGAAATTACAACTCGGACAACAAAAGAAATG
TTGCCAGATTTCAAATTTGAGCTTTTCCCGCTTCACTCGCCGTTACTGAGGGAATCATGG
TTATTTTCTTTTCCTGCGCTTATTGATATGCTTAAGTTCAGCGCGTAGTCCTACCTGATT
TGAGGTCAAATAAAAAAGGTACTGTGAAAAAAAAATAACTTTTTTTTTCGTTAAGGTTCA
AATATAAAAGAGATTAAAACTTTTTAGTTATTTTTCTTTCCTAATTTCTTTTTTTCTATC
AAACAAAGTGGTAAAACCTATTACGTTCAATAGAAAAAAAAATGAAAAAAGGCATAGAAA
AATAATTTCAATCTTCCTTTTGTTTTCACCAATCGATTTCAAACTAAATTTATATTTTAA
AAAAAAAACAAATTTTCGTTCAACACCTCATCAAAAATATTTAAAAAAAACATTTTTTGT
GAGAAGATTGTAATGACACTCAAACAGGCATGCCTTTGGTAGAACCCAAAGGCGCAATGT
GCGTTCAAAGATTCGATGATTCACGGAATTCTGCAATTCACATTACGTATCGCATTTCGC
TGCGTTCTTCATCGATGCGAGAGCCAAGAGATCCGTTGCTGAAAGTTTTAAATAATTTTA
TATATTAGATATAATTAATTCAGACTTCAAAAACAAATTTCAAGGTTTATAATTTAATTT
TGCTTCTTTTCCAATTTCCTTATATTTAAAAAAAAAGAGAAAGAATAGAAAAATGATAAA
ATAAAATAAAATAGTAAAAAAGTAATGATATGCTTGGCATGCAACAAAAACACACCAAAC
AAAAATCATCCACTCGTAATATTTACAATTTCATTTTTTTTTTCATCTTTTCTCTTTTCT
AAACACTTTTTTTTAATAAAAAAATATAAAGAAAAAGAAAAAAAATCAAAATTGAAAATA
TTTTACATTTTCACAGAAAGGTAAATGGATAAGAGAAGAAAAAGGTAAAAAAAATTCCCA
AAAAGTTAAAAGATGGAAATTTTTTAAAACCTTTTCATATAACTTTTCTAATGATCCTTC
CGCAGGTTCACCTACGGAAACCTTGTTACGACTTTTACTTCCTCTAAATGACCAAGTTTG
TCCAACTTCTCGGCAATGTTTCCGCCGTTGCCAGCAGAAACAAGCCAATCCAGAGGCCTC
ACTAAGCCATTCAATCGGTAGTAGCGACGGGCGGTGTGTACAAAGGGCAGGGACGTATTC
AACGCAAGCTGATGACTTGCGCTTACTAGGAATTCCTCGTTGAAGAGCAATAATTGCAAT
GCTCTATCCCCAGCACGACGGAGTTTAACAAGATTACCCAGACCTTCCGGCCAAGGATAA
AAAATCAAAAGATTTTTTTCAACTCGTTGGCTCCGTCAGTGTAGCGCGCGTGCGGCCCAG
AACATCTAAGGGCATCACAGACCTGTTATTGCCTCAAACTTCCATTGGCTTTATGCCAAT
AGTCCCTCTAAGAAGCTAATGATCAGCCAAAATGGCTGATCCAGCTATTTAGCAGGTTAA
GGTCTCGTTCGTTATCGCAATTAAGCAGACAAATCACTCCACCAACTAAGAACGGCCATG
CACCACCACCCATAGAATCAAGAAAGAGCTCTCAATCTGTCAATCCTTACTATGTCTGGA
CCTGGTGAGTTTCCCCGTGTTGAGTCAAATTAAGCCGCAGGCTCCACTCCATTGTGGTGC
CCTTCCGTCAATTCCTTTAAGTTTCAGCCTTGCGACCATACTCCCCCCGGAACCCAAAGA
CTTTGATTTCTCGTAAGGTGCCGAGCAAGTCGATAAATGAAACATTGCCCGATCCCTAGT
CGGCATAGTTTATGGTTAAGACTACGACGGTATCTGATCGTCTTCGATCCCCTAACTTTC
GTTCTTGATTAATGAAAACATCCTTGGCAAATGCTTTCGCAGTAGTTCGTCTTCAATAAA
TCCAAGAATTTCACCTCTGACAATTGAATACGAATGCCCCCGACTATCCCTATTAATCAT
TACGGCGGTCCTAGAAACCAACAAAATAGAACCACACGTCCTATTTTATTATTCCATGCT
AATGTATTCGAGCAAAACTTGCCTGCTTTGAACACTCTAATTTTTTCAAGGTAAAAGTCC
TGGTTCCCTACCACGCTCAATAAAGAACATGAGTAGTTTGCCAGAAGGTTAACGACCCCG
GTCATGACCAGTAAACACGCCTTGCGGCGGACCAGTCGACCAGGCTCAAAGTTCAACTAC
GAGCTTTTTAACTGCAACAACTTTAATATACGCTATTGGAGCTGGAATTACCGCGGCTGC
TGGCACCAGACTTGCCCTCCAATTGTTCCTCGTTAAGGTATTTACATTGTACTCATTCCA
ATTACAAGACCCGAAAGGGCCCTGCATTGTTATTTCTTGTCACTACCTCCCCGTGTCGGG
ATTGGGTAATTTGCGCGCCTGCTGCCTTCCTTGGATGTGGTAGCCGTTTCTCAGGCTCCC
TCTCCGGAATCGAACCCTAATTCCCCGTTACCCGTTAAAACCATGGTAGGCCTCTATCCT
ACCATCGAAAGTTGATAGGGCAGAAATTTGAATGAACCATCGCCGGCGCAAGGCCATGCG
ATTCGAAAAGTTATTATGACTCACCAAAAAAAGCCCGAAGGCATTGGTTTTTTATCTAAT
AAATACATCCCTTCCAAAAAAGTCGGGATTTTTAGCATGTATTAGCTCTAGAATTACCAC
GGTTATCCAAGTAGTTGAGGTACTATCAAATAAACGATAACTGATTTAATGAGCCATTCG
CAGTTTCACAGTACAAAATTGCTTATACTTAGACATGCATGGCTTAATCTTTGAGACAAG
CATATGACTACTGGCAGGATCAACCAGGTAACTATCGTTAGAGGTGAGACAAAAAGCAGA
AAAGAAGAAGATAAAAAAATGTTTTTTTTTAAAACTTCTTTTTACTTTTCACACACCACT
ACCGTTTTTAATTTTTTTTCTTCCCAACAAAATCAGGAAGAAAAAAACAAAAACAAAAGT
TACTCAAAGGTGAAACTGAAAAAAAAAAAAAGAGAAAAGAAAATAAATTCTTCCTAAATT
TTTTTTTTACAATTTCCCATTATTCCTCAATTAAAAAATTAATTTTATATGAGGTTGTCT
AGAGATGAACAACATTTCCTAGTTCTCTTTTAAAGAACACCGGATATATCGTTTCTCTGA
AGACAAGGAAATTGCCAGCTTGGTATCATAATTTCCTCAGATTTTAGCATTCCAACAAAT
AAACATTGTTTCCAAAATATCATATAAATAGATAAAATTGTACTCCATGTCAAAGTTGAA
AATCAAAATCTTCAGAAGTGGTTCAAACGAAATCAAACCACATAGTTTTTAATAAAAAAA
AACTACGGCTGTTGATCTGTTGTTACCACTAAATGACTTTTTCAGTTCAAATGTTAGTCG
AATGACCATACATCCACAGAAAAAACTCATCGAGTCTCCACAAGACTTCCTCTTTCCATT
TTGCAATGGATTCGTGAAGCGCGGATTCTCCAGCAGGAAAAGAGAAAAGAAAAAATCCTT
CAACTCTCCTTTCAAATCTGCTAAAGGATAGCTAAAAAGTCGGAGTCAAGCACCGTCACG
TAGACAACTGCAACTCGCTTTCCAACTTATCCTTGCGGTATCAAGGTACCGGGTTTGGGG
GAAATTACAAATTTTAAAAAACCGATTTTACAAAAAAGATGAAACAAAAAAAAAGTTTCC
AAAGAGAAAGTCTCCTTTTCCACTTCTTTTTCCCCTTCTTCTCGTTCAACCTTTTTTCTA
AAAATGTAATTTTTAATAAGAAAAAGAAAAGTATGAAAAAACTTGACGGACCTTCTTTTC
ATTCTTCTGGACAATCAAAGACCGTTACAAAGCAAACAAAAATAAAATAGTAAAATTCTA
TCTTTCTTTCCAATGCACCGCGATGCCAACACAAAGAGAAGAATCAAAACAATTTCCATT
TTCCCATTTTTTCAATTCTTAGCAAAAGGAGATTAGCAAGTCTTTACGAAAGTTGAAAAA
AAAAATTCCAAATCCAAAAAAAAAAATAAATAAAAAGTTCCAAAAGCTATTAAAAACTCT
TTTTCCTCTTTTCTTTTTTTTTTCTTTTCATCTTCTTTTTTCTTTTCTCCTTTCAACCAC
CACTCCTTTTACATAGTTCCTTGGACCTATTTTTCCTCGATTTTATAGAAACATTTGTGG
TTGTGTGAATTTCGTCCATTTCGGTGCCTATTTCCTATCCTTTCTTCCATATCCCTCCTC
TCTCCACCAAAAGTCCTACTACTACCACCACAAAACTACTTCTTCTGTTACTCTCCAATT
AGTTGTTACTCAACTTTAGTTTTAGGTTTTGCATTTGTATTAGTGGAGGTGTCTTTTACT
AGCAACTCGGCCAAAGCAATTAATTTATGTCGTGATTTTTGAAGTGGCTATTTAAAAACT
TTAACTATTTTTGTAGTTTTTTTAATATTATTTTAAGTTTCAGGTAATCTTCAGTAATCA
GTGGTTTGTGCTATTTGGGCATTTTACATTTGATGAATTTTTATTTGATTTTCAAGTTTG
TTATGTTTTTATAAAGGTAATATAACTTAAGTTTCCTGTCAATCCTGTGGCTAGCTACTT
CTTACGTGGATTCTCAAGACCAGGGAGTAGCTAATTTCTTTTCAGAAATACATGATTTGT
ATAGCAGGCAGCAATATGGACAAGCTTTAGAAGCCCTGTTGGTTAGAGCACCTTGGATCC
ATGGAAATACAAGTTCACCACTTGAACGACTCTCTGATAAATTAGATATACTATCAAATT
CCGGTGAGCAAGACTCAATTGTTTCTTTGGCGGAATACCTTGAATCAAGTCAAGATGATG
CTGAAGTGTATGCAACATTCGTACGACAATACATAAGTAGTCATGCAAGTCTTAGTAGTG
AGGTCAATACACAGCTCAATACTATGAATTTAATTCAGGGTTATTATCAGACTGTAAGAC
CGGAGCAACTGCTATCACCAATCAAGGAACAGGACGCTTAGACGCTAGTTAGAGAGTGCA
TTGGAAAACATGTGGATAAAGAAACTCCTTTGTAAGAGTTGAGTGCAACTTTATTTTATC
AATGATTTTATTTATTAATTCAAGTCTCGTTAGTTTGTTGTGCAAATTACAGCACTGTTT
CTAAAATTCACAAGAAAATATCAATTTAGTATATTACTGAGTAATAGCGTTACGATAAAA
ACGAAACACTGTGTGTAAATTTTGTCTATAAGGACTTTATTTTATAGGTGTCACTGTGCA
AAAAACTTTTAGTAGCAGTTGATTCATTTCCTCGTGATTAGAAAAATAAAATATGATACG
TGTAAAAAAATCTATAACAGCTATAATAGAAAGAAAAGGAGGGGAAATTATAATTAGAAA
TGAGTAGAGAAAGAAGAAAGAGTCTGGTTATTGTAAGATACCTAAGAACTGAAACCTAAC
GAAAAAAGAAAAGTTGCATGTAAAGTCATTAAAGAATAAAACAAACCAGAAGTTATGATC
GGTGATAACAAATTAGAAGACTGATAAATTTGGATATTGTTTCTTGGGTTATTAACGATT
ATATTGCAATAGATTAGTGAGACGATGATAGGGGTTATTAAATGCTTTAGGATTATGGGA
TTTATCAAATAAAAAAACGGTGCATGAAAAAATTTATTCAGATGATTATTATTAAGAGAT
AGGACTTTTAAAAAACGTTATTAAGGACTGGTTTTATTTGATGTATCTCGAGCATTAGAA
ATCTAAAAATTCGGCACACAAGCATAAACATAAAAAATCATATTCATCGTACAAAATTTT
TGATTGTCATATTCAACCGTTGATTTTCTGTTATCAATTTGAGAAGTTGTGAGCAAAGTA
GATAAAAAATGTCCTTCAAGATACATTGGTTTTCATTACAGTTATTTTTTATAACATAAA
GATTTTAATATCATTGCGCTTACTATGGCCTCGATTTATTGACAAAACATTCCGAGTCGA
CTTTGCAGTATAGCAACGTATCAATGTTTTTGACAATGAACGATAATTAAAATTACCTTA
GTTATCAGCTACGCAGTTTGGTATATGTTTAACAATAAATTTATTGCAATGAGTTTCTAT
TGCGATATACTAAGTGTGTTTAAACAATAGTGTTATATTTATTGTTAAAAAAATCCAATA
GTATCAGTAACCGATCTAGAACTAAGCTGAGAAACGAGCTTCAGCTTTACTTCTATCTAC
GTTATTCTAATTACTACATATTTTAATAAGTTATCATTCAATTCTATCTCAATATCATAT
CATCTATGGTACAATGTGTAAATAGAACATGCGACATATAGTGATATGCAACGCAGTGTA
TTATCGCTAACAACTGTTACACCGTGTAGGAAGTACGTATAATTCAGGGGTCCACAATGT
GATAGAAGCTCGTTCTTCTTAAGCGTTTCCACAATTACCCGTTTAACTTTGCCAACCTTG
CAGCAACGGTTTGCCGATTTTTTTCATCAGAAACTAAATCCAAGCACAAGAACAGTTATG
AGCACTTCTTTGGATGTCGCCACTCGAACTTCACACTTGCTCATGTTCTGATTTACTGAG
GCATGGATTATGTCTCCACTAAATGACTTATATCATAAGAATTCATAATAAAATTAAAAT
TCAGAATAAGGATCAAAAGGTTTTAACCCCATTGCTTATTAGCACACCTAACTATTGTAT
GATTGACCGCCAATGTAAAAATGGCATTTAAGTTGAATTGTAGTATTTCTATCCTTATTA
TTTCACTTTCCTTCTTCTCTCTTGTTTCCACTTTATTAATCAAAAGTCAAATTAATTAGG
CCGGGTTTCTTTGTGTTCGTTGCATAAGATAGTTGAGCTCAAAAAAATAGTTCCTTTTCT
TTTTTCAAATCACGATATTTTAGAGCAAAAAATATCGCATCTTATCTGTAGGCTCATAAT
GCTGTTTCGCTCTTTCGGTTACAATTAGTATGTGTATTTCAAAAGTACCACTTTTACCAA
CTATTACATAACTACGCACGAATACAAAAAATATGGATCATATTTTACATAATTACCACC
TATCGAAATGTGAACAAGTTCATAGGGCAAATATCCGTATTAATTTGGATTTATTATTTA
GTACATGTTGTGGAATTCGTTAAATATTATTACTTTTTTTGCAATAAGCTAACCGATTTA
CGAAATTCTGGCCCATTTTAATTTCATGCTTTGCACAGTTATTAGTTAACTATCTGATGC
ATCAACTATGTACAATTTCCTTACGGTCTACAGTATCATTATGCGCAAGATTGGTGTACC
AGGTATGTTACGAACAAACAAGGAATTGGATTAAAAGTGTGTTAGCACACATGAATATCT
TTTCAAATTTTATATTCTCATTGAGCTCACTTACTACTAAAAGGGTAAATATAATAGTAT
CATAATGAAAGTGAAAGTATCGTTATCACATCATGGACGTCTTTAGACTTTGTCATGAAA
AAGGAGAAGTGTTGATTGGTCTTTAAAAGGTTCATTTTTCTTTTTCAATTTCATTAGACT
CTATGCAGGGATCTGAAAAAACCTAGTCATATATTTGTTTTCACAAAACCAACAAATAAA
AAATTATAGGAAGCTGTATGCCAAAACGGATGAATTTCTTGAACGAAATAAAATATAAAT
TGTAAAATATTAGTTACAAAAAAAATTTATACTTCGGTGAAAAAAATCCGGTTAGCTTAT
TAGAGTAGTGATCGTCTTCTGTATTGTCAGCTGCAGGCACTAACCAGACCTTCATCTCAT
ATAGTCCACAAAGATATTCCGCTAAATAAAGTTATATCTATCGCAAGGAAAGCTATCTGT
ACAATAAATATTAGCAAGTAACATTTATGGTAAAAAAATTGGGATTTGTTAGTTGTTGAA
TACAATTTGTAAAATAGTCAACCTTTTCGCGGACAAGATAAATTGCTCTTAATTGCAAAT
ATACGTCTTTCACTATATAAGCTTTACGATAGAAGGGATCAATTGACATCTAATTATATA
AAGCATCAATTTCATTAAAAAACGTTTATTAACACCGAAACATAAAACATCAAAGCGAAA
ATATACAATAAAATATCAAAGTATCAATAAAAAACGAAGAGAAAGCAAGATATTTGAACA
AAAACATAAATTCAATGGAACTGATGAAATTCATATTCAGTACTCGCTTTTGACCATAAG
CCTACTGCATCACGAAGTCGCTTTTTCAACTTAATAGTTTCAGCAGGACTAAACATTATA
CCATATCCCTTAAGATATTGGACACACTGTTCCTTTGATAATTCATCAATGTCTTCGACT
CTTTCTATCGGCGGTAATCCACTATTAGCCGGCTCATTACCATTCAGAAATGGCACTGGT
TATGCCAAATAACCTTGGTCTGAACGAGTTGTATTTTCAAGCTTTCTTGTCAACATGATC
GACCTACATGAGCGAGCATCAATTGTTTCCATTTTCTGATCCATTGAGTCAAGTCGCTGC
TCCATAGAATCAAATCTTCGGTCTATGGAATTAAATCGTTGGTCTATAGAATTAAATCGC
TGCTCTATTGACTGAAACCTTGCTTCAGTTTTTTGCTCGAGTAAATCAATTCTAGTGTTC
AAACGGATCGTTTCCCTTTTCATTTCAACCATTTCAACTTTCATTTCGGCCATTTCGCCT
TTCATAGATGTCATCTCATTCTGTACAGTGTCAAACCGAGAATTCATCTCATTCTGCATA
GCGTCAAACCGAGAATTCATGTCATTTTGCATTGAGTCCATTTTAGAAAATATTCGTTCG
AAAATTCCACCTAGTTTAGTGTTTGCCCATTCATCTATCCAGCGTGGAAATTGTACTTCT
CCCGATTGTTCTTCAGAAATTTCCCTTTCAATCGCTAACTTTTTCCATCCTTGTAGCCTT
TCATTGCATTCAATTTCATATTTCATTTTACGATCTCGTTCCTCAATATATTTTTCAAGT
GCTTCTCTTTTGTTTTCGTCAATTTCTAACAATGTAGAATCTACAGATCTCTCGTATCTT
TTAATGAAAATTTTTAAATCTTCCGCAGAATCATTTGGTGGTGGCAGATTGTAGTCATTA
TCAAAATTCTCGTTCGACATCATCCTTATTATTTATACAAAACCAGTTGCAATAAACCGC
AGTATTCTTTTTAACGATAAAATTGCAATTCACTATAACTATACAAATGATATCTTTTGT
AGCCTGCCTTATATGTTTACTAATTGACAAATATTTCTCAGAAAGGGAAATCTTGGAAAA
TAAAAGTACAAACGTGTGTTGAAAGCAATATTTAATATATGTGTTGTAAGTAAATTCAAA
TCTCTCAAGTTCCCCTTATATACAACTTTAAACAAAGAATGCTAAGGACAAAGAAAAGAG
TTTTTGATGGATTAAGAAACAAGGTAACCTAAGTAACTTCACATTGGGAGTACGTGATAC
AGATAATGAAAATGGGCTTTATCTGTAAAATAAAAGAAAAATGGCTTATTTGCAGGTAAC
TTATTACAAAGTTAGATTTATTGAATAGAGGAGTACATGTATAAAAGCAAACATGGCCAA
CAATGTTGATACAAAAAATTTCGTTAGCCTGGATTACTTTATTCGTTTCAAAGGCTGCTT
AACAGCTTGTAGCAATCATAAGGTGTTTTAATCAAAAGCACATTACTCATTCAAGCTAGA
TAATTTGTAGATTGTATAAGCGGTAGCTACAATATATGCTCAAGGGATATAAACTGGTTA
TTGAAATAGCCTCTGCAAATTAATGAAAGAAACAAAGCTTAATAGAATACCCCCAATTAT
TTTAAGACGAAAGAGTTTTTTCACGTTCCTGAAACAATGTGTTTAAGAAACTCTCAAGCA
AGTATACTTTCATTGAAATATACCTCTGCTGTTAAATAGTTACTATGAGCAAATATAATA
GGTAAACTGCACAAAGCAAATACGTAAAAACTCCTACATAATACTTGATATGTACAATTG
TCATTTAGCTTGAAAATGCTAGATAGAATAGAAACGCCTCTAAAGAAAACTATATTTAAA
TAAATTGAATAAAAAATAAAATGGCAAATTTGCCCATTTACGTAATGTTACACATTGATA
TCCAAAAGGAACTTTTATCGTACATAAACACAATTTATTTAATTTGGAAAGATTGAGTTT
TGTATATTCTTGACTAACTATTGGTCTAAGTTGACATTTATTTAACCCATATTTATTATC
CAATTACTCGCTTCGTTTTTACAAGTACTGACATCTCTTAATCCTGCCTATACCATTTAT
CCTGTGTATTATTCACTCATTTAAAATTAAGATTATTCTAATCATCTCAAATCGGGCGAT
CTCATCTGGTTTGTGAGTCGGACTAGTTCAACTTCATAGACCACTAAGCTCTAAACATGA
TCTCAAATAAAGTCACCATTTACTACCCTGAGATAAAATTGCTGGTGACTTCATTCGTAG
GTATCATCAATGACAATATCTATAAATGGAAATACGCTATATACCTTGCGTTGCCTAAAT
AGCTGAGTACAACCTGTTGGACGACTTCTCTTGCAGTAGTCCGTAAACTTGGAATTGACT
CCAGCTCCTTTAACTTTGCAGCTCCATTGCATTGTCTGTTCGGAACCAGCACAGTGTCCT
TCACATCTCTCTACTAGACAACCTAAACTTAGAAAGCTTTGACCTCCTACTATGCAACTC
CATGAAACTCCGTAGTTGTTGTCACAAACCAACTTGCTTGACTATCATCGACATATTTGT
ATTGAACATTGTACAGATGTGCTATCAACACACCACAAGAAGCAAGAGACACGGTTTGTC
TCTTATTCGCCCCTTGTACATTGCAAAAGCTAATGTCCAAATCCTTAATCGATATACCTG
GTTGAAGGATTGATATTTTCAGGTCCTTCATAAACACTGTCACCAAATATATAACAATCA
GTGGTATACTGACCTGTTAGAAGTTGACATAAGTAAGCATCGGTATCAGTGTTTGTTTCT
GTAATGCTATTTAATAAGTAGTTGTAAGCTTCAATTCGTACATCAGCTGTATCAAATAGC
ATCAGTCCATGTTGGTCAATTAAATTAGCAAGTAATTCTGCATAGTTGGGAGGCAGCTTA
GCATAGTCAACAAAAGTCAAATTCACCTCAGCTAAGACAAGTTTTATGAATACACAACAA
ATACAAAACAGCAATAACATATAAGATCTGTCAGGTTCTAATGTTATATCTTTCTCCGTT
TAGCTTATAAAACTAACCGAAAAAAAGTGTATATATACTGAGTTCTACCTTTAAATTAAT
TTTTGTAGTTGAACAATATTAACGGTTTGAAATGATATATTACATGATAATTGTCCCATG
CGACTAACTCGGTTGTTGCCGGGGGCATTTGATGTATGAGGAGTCAGTGTTAGCTACGCG
GTTTGGTATCTGTTTAACATACTTAGAACCGCGGTGAGTTTTCCTTGTGATCTATTATAT
TGCAATACACAGGTACTATATGTAGCAACTTGATATTGGTAAACACCAGCGCATCTTATT
GTATCGTCTTTCTAAAACCAAACTGCGTAGAGGAAGAACACTGCCTCAGCACCTTTCGTT
AAAATCATAGGAGCGCTTTTTTAACCGACTTGGAATTAGTTGGAATATGTTCAAAGCAAT
AATCTTTGATCTTTTCCTGTTAAACGAAAGGAAAAAAATTTCAACAATGAGTCAAATTCT
TAGCAAAAAGCAGTTTTGAGTGATAATATAATTCCTTTCAATGTTTTGTTTATTTTTGTA
TACCCATGGGATGAAGGTTAAGAAACACCAGACAACTGAAGATAAAGTTAAAAACTTATT
TTTATTTTATTTTAACTTTATCTTTAGAAAATTGACATAGGTGAGTACAGGTTAGAATAA
GTTTCTTATATTTCCAAACTGGAATTATTTAATGCAAACATATAATGCAGTTATCTATTT
ATCTAAACATCTGCGCCACTAGACATTTTCATTGTTCTTACTTATTAAAGGCCCTATTTT
TGTTTTCTTTTCTTTGTTTACCTCTTTTGGTCCTTTGCATGCTTTGTTTTCATTGTAGAT
AATGAGGGTTCCAAAGGCTTTGAAAATTATATATATATTTATACATAAACTGGTGTAACT
TTGTAATTGTATTTTTATCTGGTGTTCTTGATCCTGGATACATATTGAACAACACGTTTA
AAACACTCTACCAACTTTTAATAAACAGCGTTAACATTTACTAGAACAACACACTATATC
TTTCTAAAAAATGACTACGCTCATTATTGATTAAAAATCGACGTCAAACGAGAATTTTGA
AAATGGTTTCGACTTACCTCCACCAGATGATTCAGCAGAAGACTTGCAACCGTTTATCAA
GAAATTCGAAAGATCTCTAAATTCTGCTTTACTAGAATTCGGTGAGAATAATCAGGAAAC
GATTGAAAAATTTTCGTCAAGCAAAGGAACATTAAATAGATTTGAAACTGAATGTGATCA
AAAGTTGCGAAATTGGAAGAGATTGGCGATAGAAAGGGAAGTTCCGGAGGAACCATTGGG
AGAATTACAGTTTCCACGCTGGATAGACGAATGGGCAAATACTAAACTAGGAGGAATTTT
CGAGCGAATATTTTCTAAAATAACTCAACGCAGAATGACATGAATTCTAGGTTTGACGCT
ATGTACAATGAGATGACTGTCATGAAAAATGACATTGCTTCCATCAAAGGTAAAGCAACT
ACTTTTAAGAACGAATTAACTGCCATCAAAGGTTCTATATCTCAATTAGATAGAAAAATC
GATCTTTTGGATCAAAAAACTGAAGAAAGATTTAATAATATGGCTCAAACGATGCAAAAA
ATTGATGATCGTTCTTGCAAGTCGATGATGCTAACAAAAAAATATGAAAATATGGTCCGT
TCAAATATGCATTATTCGGCTGTTCCAGTACCATTCCTTAACGGAGATGAACCTAGAGAC
TATGAACTCCCACCGCTTGCAAGCTTCGAAGACATTGATAATTTGACAAGGGAACAGTGT
ATTCAGTATCTTCATGGGTATGGTGTTTTATAAATTTAGTCCTCTTGAGACTGTCAAGTT
GAAAGAACGGCTTCAAAAAGTGATTGGCTTGTGGTCAAAAGGACACGTGCCACACAAGTA
TCACACATTTTAAGGAGTCTGTATTTCTATATCTTTTGCTGCTTTATCTTCTCTTAGTAG
AAGATTGTTTTTTACTTGTCCTTATTATGATATTTATACATCACTTTTTCGCTTTTATAG
TCAGTAGTAGCTCTTCTCTGTTGTAGCTTAATATAATATGTGTTCGCATTATTACCAATG
GGGCTATTCGAAGTCACCACCTCTGACGACTTGGTTAAGAGAGTAGTGAGTGGCAGGATA
AGGGTCTGCTTCTGTAATTGATTAGTGCTTCTATAGCAAAAATACACGTTTTATCAAAAG
GAAGCAACTTTGGTTTGCTAGTCCGTATTCATCCTCATTGACTGATAACATATTGAATAT
AAGCACATCTCCGCTAACTCTCATATTACAATGAGCTAAGATCCTTGTGGTTACAGTAAC
ATTCAACAGCTTGAATAAATTCATATTCGATGTATTGAACCTTTAGGAACTTAGATACAG
AAAACGATTAAAAAAGCACTTTGTAACGATCTAAAATTCAGAATAACTATCCTGTGTAAA
GTTATATTTGGGAAATAGCTCTACAACATTTTAATCTCTAAATAATCGGTATCTACGTTA
ATAGATACAGTTCCATAGCTGTTAGTGAATTTAAATTTTACTAAGATAAACCATTCAAAA
AGAGTGCATCAGCGGTAGGAGTCATTAGAGGGAAATTTTGAAAATGGTTTTCTCCCCTGT
TGTAAAACCTTGAGATATTTTATCTATCGAACTCATCCTTTACATCTTGACTGATAAGGG
TTCCAAAATCATTTCAACTGTATCATGAACCAACGAGGTATTCGGTTTTATTCGTATCAC
ATTTGCAATGCCCGTTCGGTAAAAGTCGATTTCATAATGTTAATAAAGAAAGGAAGCCCA
AAACTCACTTTTGAGCTGAATCGCGCCTTTTTCGTACTTCTTCATACTTCGTTTATACAA
CAAACGAATTACTAGTATAAATAAGCTTGTACTTGATGTTAATCCTCACCATCGTATTGA
ACGTGAAGTTTATGTTTAAGTAACACATGGAAATGAAAATAAGCGATTTAAGCAAGCTAT
CGTCCATCAAGATAATGTCAAATAAAAATGAAAAGTTGGACTTTGATTTCGCATAACAGT
TAGAATCCTAAACAAATAAGCATGGAAATAAATATCAATATGGCTTATATTGCAAGAAAA
AAGTCTCTATATTTGCATGCTCTTTAATCATTGCTTTCCGGGAATTATTTACATTGATTT
TAGTCTCATATACTCAAAATTCTATTGTATCTTTCATTTTCTTCCAAATAAAAATGAGGT
TGTGGATAAATAATTTGTTTGAGCAATTAAAAAAATAGATAGGTATCGTTTAAATTTCTG
TAAGAGTGGGTCATTATTTGGTCGGTAGCAGTTTGTGAAGATGTTTACAATTTAGAAAAT
TTCATTTAGGCTACTCAACTTATACAAGCAGTCCCCTTATTTGTGCTGAAACAATAATGA
AAATTATAACATCGAGTCTAAGTCATGCTTGACAATGTTTTGTTTGTGTTGAAATTAATA
GGAAATAAATTGAAGTTGATGTACACAATAGAAATTCGCTTAGGTTTGCTTAGGTTTTTT
AAGGTATTTTCTAAAATTTTAATTTTTTTTTTAAAAAAAAAAAATACAAACAAATTTATA
AAGAACTCACTTATAGCTATCATATTGATTAAGAAGCGCAATGAATCGTATTTAATTACC
AGTATTAAATTTAATTCAAATTAAATTTTTTCAAAGTTTAACCTAGCAAAACTAATTAAT
TAGACATCCACCCTATATGTGATATTCGCATAAATCAACCACATTAAGCTACTATCTCTT
CGTACGTCTACCCGATAATGGTGTTAAGCATATTTTGGGATTGATCATAGTGTTTAGCAG
TTTCTATCTCATATCATTAGATAGCTACTCAAAGTTTAAATTAATATATCTGAAGTAGAA
ATTTTATAGTTCTTATCTGGCTTTTAAGAAATAAAATTTTTAAGTGTACGAAAACAACCT
ATGCGCTTCTCTGTTGTCAATATCCAGTTATAGAACCATAAATAGAAATTTGACAGATTT
AAAGGTATTTTCGATCAGAATTTTACGTGTAGCACGACTGATTATACTATCATCCCAAAA
TAAAACGACAACATTTTGGATGAAAGGTAGCCAAATATATATTATTCATGCTCAAAGTTA
TCTCATCTTGTCTAAATGCATACACCAGCAGATAATCTCTTTGGTATTATAATCCCTTTT
CTTCTTTTGAAAAGTTTAGAGCTACTATATAGTATATACATCAAACACTAATTTCAATTG
CATGCCGTAATTTTTTATATCGTGTTCCTCGATTCTGTGTATACCGATTGGCACATGCGA
GACAATCGAAATTATTATTATTTACTATAGTACTTATAACTAGTTTAAATTAAATTCACT
TATATGGGACTTTAGTTCGTTCGTTATTTAGTCAGGCAGATGTCAGAAGAAATATTGGCG
TGGATGTAAACTTCATACTACAAATAATTCTTCAGAAGACTTTATACCTTTCAGAAAAAT
AAGAATTGAGAGACCTGCAAATTTTGTTCCATTAAATTTTGATAAAATATATTGAAGGAC
AGGATCGGAAAAGTTGGTAATTGAAAGAGAAATTTCCGAGCAGAAGTATAATATTCACAA
TGAATTTAGAGAGACAAATAGAGAATTAGGAATTTTCGTCCAATAAGTATTTTTTAAAAT
GGAGTCTATGCAGGAAGGCATGGCATCTAAATTTAACTCTATGCAAAATGGAATGCATTT
ATGGAGGGTGAAATTTCCTCTATAAAGGACAGGATTAATTTTCTTGAACAAAAAAAATGA
GGAAATGCTTAAAAAGTAAGAGAAAAAAATTTAAATTTTTTGAAACAAAAAACGCAAACT
ATGAATGATAATAATTCTTGCAAATTGACCATGCTAACGAGGAGACTTGAAAATATGACT
CAAGAGTATGGTCAGCCGGATCTTCCAGTACCGTTTCTTAATGGAGATGAACCGGGAAAA
TTAAAACTTCCATTGTCAGAAAGACATGAAGACGTCGATTATTTGACGAAGGAACAGTGT
ATTCAATATTTTAATGGTTATAGTATTCATTTAATCCCACCGAGAATATCAAGTTGAAAC
AACGAGTTTGCGATGCGTTTGAATTTAAAGTGAAAAAGAACTATTTATGGATATAATTTA
AATGATTAAATTACGTCCCTTCGATTGTTTTTGCGCCGTTACTAAGGTGTCACGCTTCAA
TTCTCGTGTCACAGTAGCAACTTTCAATCAAATAAATATTGTGCTTAATTCATTTAATTA
ATTTTTTTGTAATAATCAGCTATTTTCTCTTTGTATTGTGTCCATCAGGATTCTAATATA
CGTCGCTTATGTCGGCTGTACTGTAAAACAGATATAGTCTTTCTACCAAGCGAAATGACG
TCTAAGGAAAAATGAATATACAAAAGTAAGTATCTTTCGTTCGATTTTAAATACTACTTG
AACAAGATACCCAAGTTTCTTTTGTTTATAAAAGTTATGTTATAAGTATCAATTAGGTTA
ATGGTCAATGTTTCATTTTTTTTTAGAAACTTCATCCTCATGGAATACAATCTCCCACTG
ATTTTTGCATTTTTGGCACTGAAACCAGATACGGACTGTCTTCAGATATTTCTATAAAGT
TGAAGACAAAGGTCGATAAAATTAAAGAAAAAAAAGAAGAGGTTTTAAAACTTAACACTA
GTACTTTTTATGGTAAAGCTGAAGTACGTCTAATCAATGATGTTTCAATTTTAGATGGAA
TCAACAAATCTGTAGTTCGTTATGATACAGGTAAGATATCGGAAGGACTGCTACATCAAG
AGGAGATGAAAAGAGGTGTTGAAAAGAGACCCAACTGTTCGGAAACCCGCAAAACACATT
TTCATGATAATTGTGTGGGTCTGCTCTATAATATTTTGAGACTATTCTATCTCATAGATA
TAAATTTTGACGAATATGATGCATATGCTACTTATTTTCAAGATAACGCTTTATTAGTTA
TAAATGTACACTTATTTGGAGACCAACCATTTTCTAGCTTGGAAAACTTTGTTGTTCAAC
CCGTCAGCGTCAATGTTATTTGCAAACCAGAACTTAACGAGACATTTAATTCGAATTCAA
ACTATCTAAAAGTAGGAAATACAATTGATGAACATTTTTTGAAGGTGATTCAATTTTCAA
CTGCTGGGTGGTCTCATGTTCAACCTCTGGCATTAGCTCATAAAAGTCCTCCGCTTACGG
AATCTCTTTATTAGTAACAAGCGCAAAAAACCAAAAAAAAGATGATTTCAAACTGCGAGA
TATCGTTTAAGGAATTGGTGAATGGCACTCAGGATATTGAGAACATCATCGTTCGCTTGG
TAAAGGATAATAGACTATTTACACAGTTTGATATTGCTTATGGCATGGTTGCACAAGTTT
TTATGCAATTAAAACCATTTTTAGTTGAGGGAACTTATTGGATTGCCGAGCCCCTTTTAA
TGAATATTCCCGAGTTGAAAACCCAAAGAGGTCGATATCCAAGTCTTCTTGATGGTCACC
TTTGGAAATTGACAAACTCGCTCAAACTACTCTTAAAAATTGGTATTCGCTACGTGATAT
CATTTTTTGGCATTCCATTGCTCTTTCTGAAGCCTCGTATACGCAAAAATATTTATTGAG
TATAGAAAAATACAGTGAAGAGAGAGAGAAAAAAATGCTTTTGAATGGAGAAATCAATGA
ATCATCTGGACTGCTTCATGATGTGGTGCTGGCTGCTGAACTTTTTAATGTGAAACACGC
AAGTTACTACAACGTACATGCTGGACTTGATAGGTTTCAATTTCTAAGAAAACCATTAAA
GTCTTTGGTGATGTTTACTGATGTTGTTAAAGAAAGGGATGGTACTTGTGATTTTTGTGG
GACGTATTTTGAAGACTCGAGAATGTCTACTTCTTATCTATGTGATGAAAACAGAAAAGG
TGAAAATCGTAAACTTGAAATACGAGATCTAGTTCCATACTTATATCCAGTTTTACTGAG
AGGAGTTCTTTCACTCCCTGTATTTGAAAGTCGCTTGAAGTTCGCTGCCAAAGTGCCTAT
CTACCCCAAAGGACCTTTGTACACAACAGACACTCACACTTATAACTATTTGATGAATTG
CTTTGTACCAATGAACGAAGAGCAAGTCTTGAGCGCGTGTTATAGATTTTTTGCGAAGAG
TGCAGAAAATGAACTATTTGAGGCGTGAATATTAATTGAAAAAATTAATTAAAAAACGTT
TGCGCAATAAATGTTTCACAGTGGAGGAGAAGTAAATATATATATATATATTGGTTATTA
TTTGTAAAAGCTATTGTTTATTGTTACTAATATCCTTAAGCTCTGTACAAGTCATCGAAA
AACATTTTTTTTTCATTTTTAAAAGCAAGCAGATAGATCTCTAGAAGCTTGCTTTTACGG
TGTATATCTTTTTCGCCAGTGAATAAGGGTGGCATGTTGCAAAAGGCTTTGACTATTGAC
ATCGTTTTTTACTCATCTCTACGCAGTATAGGCATATCGTATACGAAAAAAGGTCAACGT
TTATCCTTACTCTGTATTTAGTTGCCATTACATTTTTGCAATTAGTAACTTAAGTTTTTT
GATAGAGTTCCAAAAATGTAGGATCACGACGAAGCCAAATTTTTATGAGTACTTAAAATT
CACAATAGCATTTTAAATCTATGAACCTTTTCCATGCTTTTAGGTTCAGTGAATTGCTTG
CAGATCACAAATGTATGCGATTTAGGCAGCTACGTTAAATAAATTTGTGACTGCGAGGAT
TAAGAATTAAATAAAGACTTATTGTTACTATTCTACTACGTTTACTTATTATTTCTTTCG
ATACGACACTTTTGTAAATGAAACTGGGCTTTTTCTCGAATACTCTAAACAGAATATGGT
TTATTAAATTTGTCACATTTAGGTTTCGTTTATCAGTCTTTCACTCTCGCAATATATTTT
AAAGATCATCAAAAAAGTATACGCTCGTCAATTTTTATATAGTTCTTAATGTAACATACG
GCTGATCAATGCCTTACTAATGTTAGATAGTGTGTTTTAAAAATCGTTTATCGACTTATA
AAGCTCGCTGTTAATAAAATAATATCAAAACATTTTTGTGAAGTTAAAAAAATAAGTTAT
AGACCATCAATAAATAATAATTTTGATAAATTAGAATATGTAGATGTTGTAGACATCATA
AAACTGTATGCACAAATAGACTATGAAGGGAAGTTCATGAAAACTTAAAGGATATTCCTA
CTTAACAAATCCACAAAGTTCATTCCATTATATAAAGGATGATTCACATAATGCTTTTAT
TTTGCCGTAGAAAATTCTAAAGCACCATGTAGATCAACGAAAAAACTCTAATCCGCATAC
TATTGGCATAAATAATATAAAAGTTTTTTGTTGACAGAAGTTTCAACCATCTCGTTCAGC
CAACATATTCTGCACCCTTTCATCGTAACAGAGTAGTCCATTCTGTGAAGGGTGCCATAT
ACAACAAGGAATCAAAATTTATGTTACATAACGGATTGACCAACGCACAAAATCACCTAT
ATGGGGGGCAATTCCAGTAGGAGACCACCATGAGATGGTGCCAAAGTATGACACAACAAA
AGGACGCATGGTGAACATTAAAACACCTTAAAAAGTGTCGCCGAATGTTTTGAAGTCGTA
GATGATTCAAGATAAAAGTTCTTATACAACAAATAAATTACATACAGCCATATCAAATAA
CTTCTGGAACAGATAACAAATACATCGATCATATCCAAAGCTTTAGAGGATCTCATAAGC
TTTCTGTACAAAATCTTCAAAACAATCTGGTAAGCCTTGGATCAATACAAGCCTGTCATA
GTCATAGCTATGAAATTACGCTTTATTAGTCGCCATACTCCAAAACCAAATACGGCCAAA
TAAGCACTAGACGTTCCAAAAAAAACATCGAAAGACTCCTTAATGTCCTTTTAATTCCAT
GGGGTAAATTAACCAAGGTAGTTGTAATTAGAAGGCTTTGTCCACCAAAAAGAATGCGGT
ACCAAAAGCTGAACTCACAATGAGCAGTGTAAGAGCACAATGCATGGGGGAACAATCGGA
GGGTTGTGGTTTCATTAGGTGTACCCAATAAACGGAGGTCGGAAAAAATTTGAAAATTAA
TACTAGAGGGCTGTAATACAAAGCATTATTTGAATAAGCAGCGTTACGCATGTCATGGAT
TTGACACTTGTCATCTAACCAAACCTTAAGGCCAGCAGGTGATAGGTGATCCTTCCTTAG
TTAGAGGTCTTGAGACAAAGCAAAAAAGTCTTTCTTTCTTTTCTTTAACTGATAGAAAAT
GACCTGGATAGGTAAAATCAGTGGATAATGCAAAAGTACGAACGGACTCCCCATTATACA
GGAATGGACCAATCAACTGATCTCTTTCAGAAAAGGAAATGAATAGGGACGCAGACAGTC
TACCATTTTGCTCAAAGATTTGAGGACAATAGTGCTTTAAGACAACCCACATTCCGAACT
GCTGATCCCATTCTGCGGCATTTTAATGAGTAATGGCTGTACTTCCACCGGACTTTCGAA
TATTGTAAGAGAATACACATTGTCTGTTCGTTTGCATACATCAATTGACAATTATTCGAA
GTTGAAGACTATCATTGTCCAACTTAACCTTCTCAAAAGAATTTGCCAAAGCCAAAAGAG
CCATTTGAGCATCCGCTTCTACTCTAGTTAACTTAAATAGTGTTTAACAACTAGCAAGGA
TCAAACCTCCTATAATGCTTAAAAAACTTCGCATGCTGTTTAGTCTTGATTAAAAAAGGT
AATTAACGAATGTTTAAATTGACGACGCTTACCCTTGTAGTGCTCGCCTCGCTACATTAA
GATACACAGCAGTTTGTTAAGTGTTTAAAAGATTAATTACGAATGCAAATCTTACTAGGG
CTCATTATCCTACAAATGAAAGGTTCTTTGCTTATTCGAATTTAAAAAAAAAACTTGAAG
TTTATAAGGCTAAAGATTATAAAAATATTAATTGAGTGATTTTACAAGTACATAATCGGT
TATTGGGAATATGCGGTAGACGACATTATAAATATTGCTTAGAGTCACTAAAACAGCAAA
ATACTTTCACATATTCTAAATTTAATCAAAAAGTCAATATACCTGACTGTTATTGTAAAA
GATAAATTCAGAAAATAGTTGAATATATTGATCGTTAGAAAAATAGTGTGAAACAAATTT
AATCTCGCATTTTTTTACCTAACAAATAGAGACGAAAGTGCATTTATCTAATTTACGTTT
CAATATTGAAATTCTTACAGTCTACTCATTATTTCCTCATTAAAAGATCGACTTGGCACT
GAAAACAAATGAACCGCCGATATCCTATATTGTTACAAAGCATATGCTTATTTGAAAATT
TCACAAATTTTATTGGGTATCCAATCTATGTGGGCATAATTAAATGTACATAGCAATGTA
AAAATCTCTCTTAAGTTATCTCAAAAAATGAAGCTTTTCCGAATATTGAAAATTGAAAAC
AAGATAGAAAATATAATTTTAAACAAATGGGGCCAGATATTGCCATTGTTTTGACCTAAT
CTTCAATGACGACACTAAACTTATTAAAAGAAGAAACTGAAATCCTCTTAATGAACTGGG
GGATTACAAGACTTGAATCATTGGTCAAATAAATGATTCACCGACCATGCAGTAATGCGA
AATATAAAGAACAATGTCGTCTTTCCTAAAACGATGAAGAAGGAAAGTAAAGATGTTCCA
AATATTTACAACCATAGGAAGTAACCAAAAGAGGGTAGCCAGTGAAAAAGTTTTTATACT
TTTTCGGGTAACCAAATTACTAATACAATAACATGCTTTTGGGTAGGAAAGCTAGTCATC
ATATTAATAAAAGTAAATGATGATAATGATAAACATAATCACAAAGAACAAACGATAACT
TGTAAAATCAAGATTTGTATCGTTGTTTTATCACGCTGTATTTTGTTGAATTTTAATTCA
TTACGGAAACGTGCTTGATGACACTCATAACCGCATTTAACCTTTTGTTTAAGATATGGA
TACTGACAACCTCTAAAGATACTGGTTTATTTGTTTTCCCATTTTTCAAGCTAAAATCCT
GAAAAATGTTTAGCTGTATGAATGGAAGTGAGGTTATGAATTTCAATTGACAAAATAGTC
TCAATATATAGTCGGGTTTGTTTACATTTACTCATTTTTAGTCTTTATTCATGGACCCAA
TCGGAAAACGTTTGATGTTTACCTCTCAGTTAACAACCTATAATACACCGTTACGACACC
ACATCAAACTTTATGCATCGTTTATGCGGTGTGAGATCCAATTAACTTCTTCCTTTGTTT
ATTCATCTTTTAAATGCAAAGTTTATGCTTCAAAAGGCGATATTCAATTGGTTTGTTGTA
TCAATGCGATAAAATAATTGTTTGTTTACATTTTTGTAGACAAATCAGACGAATACGGTG
TTGTATGACATTAGCGTTATGTAATTTATATGTAAGCTACGCAGTTTGGTATCTGATTTA
AAGATACGTAGAACTGCGGTGAGTTTTCCTTGTGATCTATTATATTACAATACACAGGTT
GTATAAGTAGCAACTGAGTATAGGTATTGTATTAACTGGGTTATAATGTTACCTATCACT
AATATAGCTCATAACTGAACTGAGGAACGAGGTTCAGCAGTAGCTCTATTTATAGTATTC
AGATAATATTGATCTTAATAGATTATCATTAAGATCAATCTCCATATCGTATCATACATG
GTACGATATATAATTAGAACATGTGACATATAGTGATACTCAACGTAGTGTATCATAGCG
TAGTGTAGTATTGCTGACAATAAACACGTTTAAGCATCACCGCCATATCGGTCGTTGCTG
CTTACGAGATGAATCTGCGACACGTGAATTAAATATGACTTTGATAGGTTGCACTACAGC
AGTATCCTTCATGATCGCTTTGATTTTACCCTTTGAAATCACCTGCTCATCTTTTCTACA
CTCTGCACTATTCAATTCTTTTACCATTGTGTTGAGGATAGGAACTTTGTGAGTCAACCA
AGTTCGTTTCTCACAAACTCAAGCGATTTACTTCCTTTAAAGTAAACTACTACAGTGCGT
TGCAGAACTGTTGTGATATTAGGTAAAATTGTTATTATTATTGGAATCCTAAGTGGATAC
AGGTTTATGTGAACGCAATCTATTCAAATTACGCGTTTATTTGTATGAACAGTATGTCTG
AATATGTTAAACCTAGAAAAAATGAATTTCTAAGGAAGTTTGAGAATTTTTATTTCGAAA
TACCCTTTCTATCAAAGCTTCCACCAAAGGTTAGCGTGCCTATCTTTTCTTTGATATCGG
TAAATATCGTAGTTTGGATAGTTGCGGCAATAGTCATCAGTTTAGTTAACAGATCGTTAT
TTCTCTCAGTTTTATTATCTTGGACACTTGGTTTAAGACACGCTCTCGATGCTGATCATA
TTACTGCAATTGACAACTTAACGCGCCGTTTATTATCAACAGACAAACCAATGTCAACAG
TTGGAACTTGGTTCAGCATTGGTCATTCAACTGTAGTCCTTATAACTTGCATCGTAGTAG
CAGCTACTTCCAGTAAGTTTGCAGATCGATGGAATAACTTTCAAACCATAGGAGGAATAA
TTGGAACTTCAGTTAGCATGGGACTATTACTTTTGTTGGCAATTGGAAATACCGTTTTAC
TAGTCCGGTTATCGTATTGGCTTTGGATGTATCGCAAATCTGGTGTCACTAAAGATGAAG
GGGTCACCGGATTCTTAGCTCGAAAAATGCAGAGATTGTTTAGATTGGTTGACTCTCCGT
GGAAGATTTATGTACTTGGTTTTGTTTTCGGATTGGGATTTGATACCAGTACTGAGGTTT
CCTTGTTGGGTATCGCAACCTTGCAAGCCTTAAAAGGAACATCTATATGGGCAATCTTAC
TTTTCCCCATTGTATTTCTTGTTGGAATGTGCTTAGTTGATACCACAGATGGAGCATTAA
TGTATTATGCTTACTCATATTCTTCGGGTGAAACCAATCCTTATTTCTCTAGGCTTTATT
ACTCCATAATTTTAACATTTGTTTCGGTTATAGCAGCATTTACAATTGGTATCATTCAAA
TGCTTATGCTAATCATAAGTGTCCACCCAATGGAAAGTACATTTTGGAATGGCCTCAATA
GATTATCTGATAATTACGAAATAGTCGGTGGATGTATATGCGGTGCCTTTGTTCTAGCAG
GTTTGTTTGGTATTTCCATGCATAATTACTTTAAGAAAAAATTTACACCTCCAGTGCAAG
TAGGAAATGACAGAGAGGACGAAGTTCTAGAGAAAAATAAAGAATTAGAAAACGTATCAA
AAAACTCGATTTCTGTTCAAATTTCCGAAAGTGAAAAGGTGAGTTACGATACAGTGGATT
CTAAGGTTTGAACGACTGGGAATTTCTGTTTCCTTTTTTTTTCTTCAGTATTCTCGATTT
GTTCTCTTAACCTGTTGCTTGGGTTAAAAGTCTTTATGCCTTTATCATGATGAAATAGAA
ACTCGGTTCGATATTGATGATTTGAATAAGCAGACGAGCCACATACATTCGTTTGAGGTC
ATATAGGTTAAACAGTTGCTAGTAGCAATTTATTTGTGTGAAAAAAGAAAGGCAAGCAAA
ATGTGAAAAATTTATTCTTTACATATTTTACATGATAACAAAAAATCCTCCTTGGGCCTG
GCTTTATGATTCGGGCAAAATACCAGGGCTGTATTTTTTTTAAAAAAATACTGTGTATCG
GCATTAGCACTTTGCTTACTCAACTTTTGGAGGCTTGAAAATGCAGGTTTATTCAATATA
ACATACGGGTCAAATATATTACCCGATGTATTCTAGAATACTTTTATAAAATTCTTGACA
AAGAATTGATTTCATTGGGTGATTCATTCATTGCTTGACTATTTGATTAGTAAACTGTCG
AAGAAAAAGTTGAATTAGTTTCTTCCATTTCTGAGATTCGAACATTCTTCAAATTTTTTA
TATAAAATAAAAAATGAGAAATTCATGAGTTCGACTAATTTTGTGGGATTTGTTTCTGTT
TTTTTAATTCATCAAATGTCTCTTTAAATCCATCAAAGGTATCATAGTAATCAGTGTAAC
CAAGCTTCCTGGCTTTGCTCATTGAGGATATAACGTTGTACGTCCTGCCGAACAAAAAAT
CACAAAACGCCCAAGTCCCAACTTCTAAAGCATGAGCATTGAGTTTTTCTCTTTCTGCGA
TTGTCCTCCAAGCGTCTTGGACTTTCTTTTGCTTGACCCATTGTTGAAGCGATATTTGGT
TTATTATTTTACTATTGGGGGTATGTTTAATGCCGAGCTCTTTTTCGTACAGATTTATGG
GAGAAGGTGTACTTAAAGTAACTTCTGTACTTAATGTAAAATCCGTTGCAAATTGGTTTT
TTGGTACCTCGACCCCAAAATATTCGGCTATTTTAGGCCAAGTTCTTGACCAACTGTGAA
TATCTCCGTTTACAATGTTGAATTTCTCTTCACTGCATTCTGCTTTAAATGTCATCCATA
ATTGAAAATCAGCAATTAGCTTTGAATACGAGATATCATCGAAGCCGAGATAGAACTTTT
CATTTCCTGGAAATCGGAACGGTTCATGAAGCTCCCTGCAAACCAAAGCATATAATGCTA
TAGTGAATGCTTCATTCATGTAGCTTCCTTTTGATACTCCGCAAATATCATTCGGCATAG
CTATGGTGTAGTCCCATTTTTTACCGTTACTAAATTCTTTAAGAATATCTTCTTGAACGT
AGTAAAAATTTGGAGTTCCACTAAATGTTTCAGGTACTCGTATGTCTGTCTCAATCATTG
GCAAACGAACTTCTCCTAAATGTAATCCATAAAATTTTAGACCAGTGGTTAGAATTACGC
GTCTCAAAGTTTGAATGGAAGTAAGTTCTAATGCTTGCACAAAGTTTCTCAACATGTTAC
CGTTAACTTCACACAACTTTTCTTCATTATTTTCTTCTTTATAAGCTGCAAAGTATGCAT
AATTTATTCCCTTAACCCCCTCGAGAGAAAACTTTTTTGCAATATCTTTGGGTTCTTCAT
TTAGCAGATCTATGGAATGATGCTTGATTTTTCTAGGGTATTCATCTTTCAACGAACGAG
AAATACAGTGTATAGTTTTGCAATTATCATCCTCTGACAGTCTCTTAATAATAGCTGCAC
CATTTAATCCTGTTGCCCCAGTCACTATAGCCACGTAACCTTCTTCTGCCATTGTGTTTC
TAACTTTGAATATCTTTTAAGAAATCTCGCATATATGAAATATATATATATATATATATA
TATATATATATATATAGCATTTATGCTTTAATTTATACCCAAATTTTATGATCTCATTCA
CTTTTGCTATATCACTAGTAACATCATCCATACTATAGACTTGTTCTAGTTTGTGAAATT
CACAATAGCTAGTGAACACATGTCGGTGTGATAATAACAGTATGATGTTGCAAGTATGTA
TGGTCATATTTGATTGAGGTATGAAATACAAAAGGTATTTTAATAATGCTGACTATATGT
AGGGACGCTGTTAGAGCTTAGCAAGCAAGTTGAATACAGAGAAATCGAGGCACCATTGCA
GTGATGCCCCTTGCGACTGATGGAAAAACATAACAATGAATATTTATCTAATTGTTTTAG
AACACCTGACTATAAACTGTTAACTTTATGGGAAGGTTGCTTGGAAGGTTGCTTGGTTGG
ATGGTTAAAAGTCATTTTTGAAACCTCACAAGCTGTTCGTAATTAGTTCAAAAACTAACA
ATCTAAAATAAAAAGGAAATAATAAATAAATCCAATAAAATCCAGCTACTAACAAAAACA
ATAAATTGTTCCACTATTAACTCTCGCTATTCTAGAAATTTAAGTGTCATTAATATTGGT
CTTTAAAGCTCAAGTTGCTATTTACAACCGTCTCTTAGTCATCGAAATAAAACTAATGAT
CGATCTTTGAAGCCATCAATTATACGCTTTCATCAATGTCGAATTCATCAAGGCATTTAG
CAGGTAGAGTAAAAAAAGAATCGTTACAAAAATGGATGGTTCATGTCTTGCGAAGAGATT
GTGAAACTTTTATGGCAGCCTCCGCTGTAGATTTAGCACTCATTGGATTCACACCTGTTA
CAATTCTTCCATCTACCTGAGTGAAATCGGACATCGGGGTAGGCGGGTCAACGAACTCTG
CACCGGCTTCTCTAAACAAGCTGTTCAGATCTTGCATGTTCCTTTCTCTCAAAGCACTTG
ATACACCCATTACAAGCTCTCCAGTACTATTGAAGGCGGTAACCTTCTTACCATATACGA
CGGAACGTCCTTCTGGTGACTTGGTGTCATCTACAAAAGGCAGCATAACTGGACCGTGGC
AGACGGCAGCAAGTACACCATTGCTTGCATAAATTTGTTGAGCAAGCGTTTGCAAATTTG
TGGCATGTGGTAGATCAAACATGGCTGCATGACCTCCTGCAATAAACATGATACAGAACT
CTTTGTAGTTAATTTTATCGGCAGGCTTAATATCCTTCAGCGCATACCAAAACTCATTAT
CCTTGTTGTCAAAAGCATCCCTCTCCACTTCACCCAAGGCAGATTTTTTGATTGAATGGT
CGTCGAATTTACATTTTCCTGTTTCTGAAGTTAGTTGAACTTCATAACCCGCTTCTCTGA
AAACTTGATAGGGAATCAAAAGTTCCGCAAAGTGAACTCCAGTATTCATTCCATCTGGAT
AAAATGGTCCATAGTAACTGCTTGCCACGAGAAGTACTTTTCCTTCTGATGCCATGGTGT
ATAATGAATGGGTGATCTTTGCAGCTTCACCTCAATAAATAACAAATTTTAAAAAAACAT
CACTTAATTGCAAAAGCGGGATGAATTTCCATTACGACTACTCACGTAATCTATTTACCA
GGTTCTTGGATTTCTATAGAAAGAGTGACGAGGGCATTGTGTCAATATGATGTTAAATTC
ATCTTAAAATCAGATGGATACGTTTGAATCTAAAGTGGTTTCGGCACAATTCTATTCTAT
TGTGTAGAAGGACATTGCGATCGCTACTGAGAAAATGCAAATCTCTTTGTATTGTTTAGT
GTATAAGTTTCATCTTGATTTGAGAGATTTGCTTCAAGGACTTTTTGCTAGTTTCAATTA
TCATCATGATTTTCCTCATACGTTTTAGGATTGTGAGCGATGCGTAATTAAAATTTCGTA
GTCTATGATTGTGAACGGAAATTTTTTAAAGTACTTTATTACTATATGAACATACCAAGC
TAGAATGTTGCTCGTTTCAAAAGACAACTGTAAATTTGATCTATTCAATTGGAGTTTATT
GAATATTCAGATAAAATAAGAGGTTTAAGTTTTTTTCATTTACACTCGCCAACCGCAACT
TTAATTATATTTTTTCTTTTTTTGCTCTTCAGTATGCCACGTTATACTGTTTTACGTTTA
GATTAGAGCTCGAATAATTTTATACCAACAACGCCTCTATATTCGAAATCATTAAAAAGA
TAAGATGTCAACTACTTACATTGCGCTATAATACACTGCGTTGCGTATCACTATATGTCA
TATGTTAAGATACTACTGCACCACACATTAGTGAAAAGCACAGATAAACTATCTGTCTAT
CTACATAGATAGCAACTATTAGAAAGATTATAAATAGAGCTACAATTGACCCTCGTTTCT
CATTTCAGTTATTAGCTATTAGCTATATGGTCACCGATACTAATAGACTTCATATAACAA
TTAATATACATTGTTAGTTAAATATTGCATACCGCTATATTGTAGGTCGCAAATAAAACT
CACCGCAGTTCTATGTATCGTTAAACAGGTTCCAAACAGCGTAGCTGACAGAAACTGTAT
TTTAATTGTCTACTGAAACATAAAAACAGTTGATTGAGAATATATTTTGCCCAATAAAAT
ATTGAAAGTTCTGGATGTGTTCCTTGCTTGCAAAAATTTGTATTTCGTTCTTTCTCTTAC
ACTCATTCGTAACTTATACCTACTAAACAATCGTGGCGACTGTGTGGATAACGTATATGC
GGAAATATACTACAATTGAATTTGCCATGGTCTTTACCGTGTTTAATTAAATGTGGTTTC
TAATTGTTTCATATACATTTCAATTGAGGGGATACTAGAGAAACGTAAATAATGAGTATC
CCATTTTTTACTGGAGAAACAACATATTCATTTGCTTCTTGCGTGAGCTATTCAGGACAT
TATTGTGTTTCCATATATCCCATTTGATATTAAAAGAATTATTCTGAAAACGAAAACATT
GTTTACTATTGCACTAGTTAACCAACGTTTGTTTACGCTTTAAAGCAGTTTTGCACAAGT
GCATTTTCTTGATGTTGAAAAGTAGACTTTCACAGATTTAGATCTCTTTTAGTAAGAAAA
AAATAGGGTAATAAATAAATTTTTTTAAACTACTTTTTATTAAGCGTTTTTGATGTTGAG
GTTTTTAGGAATAAACTCTGCTAGTATTATTTCAAACATTAACCATGCGTAAATTTTAGT
ACCAACATTTGTTAATCATATATGTTAACGATACTTAGCAAGTCGATATTTATTTAGTGA
AGTTTAGGAATGTCGGTTACGGCGAAGATTAATTTCATTACTGTCGGCTAACCTCTTTTA
TTTCAGTATTTGGACTAATGAGCCACATGGATAGTGAACGCTTGCTCTTCAAACGCTATT
TACAAAGATTATTCATCACGAGAATACTTACGTTGATCAGGTTAGATTTATCTCTTTTTA
GACGATATAATACCAATACTATCGTTGGATCTGTTGCATATGAAACATTAGTGGATACAG
TTTGCGATGTCTCATCGAATTCGACATTTGTCGTAAGTAGATTTACATGTTTTCGTTTTT
CGGTCTTTTCTAACTAAACAGATGTTTAGCTTGCCGTCGGAAGAAGGTACCTTTAAATTT
TAAAAATCTACTTTAAGCTAATTTAATCAATCGACAGGTAAAATGCAATCGACAGTATCC
TTGCACTAGGTGTCTGAAGTATGGCGAGGCGTGTACTTATGATGAGCGAGACAATAGGAA
GAAAAGGCACTCTCTTAGTTATCTTCATTCATTGGAAAGTCAGTTGGCTCGGCTGGAATC
TTTTATTATGACTCTTAAAAATTCGGATCCTGAAGGACGAGATGAGATGTTAAAATCTGT
AGTCTTTTCCGACCACCTTACAGAACCAAATGACCAAGAAGTTAAATCCGAAGGCCCAAT
TGAGTATCCTGTCTTTTTGAATGTTCAAGATTCGAAGACGGTATCCTTTTATGGACCGAC
AAGTGCCTATGATCTATCTTTGCCAGATATCACAAAAGACAACAAGACTACTTGGAATTT
TCAAGCTTCTTATTCTCCCATGGTATCAGAATGCTTAAAGTTGTTTTTTAGGTATCAATA
TTCTCAATTTCTCTTTGTATACCGGGAGTCGTTCCTTTCAGACTACTATTACAATTTTCA
CGATGGCTTCTACTGCACTGAACATCTTATTTATGCAATTTGCGCTATTGGTGCCAGTAT
GTCAGATGACGAAAATATATCCCGCCATTCGAAGTCGTATTATGATGCTTCTTGGCAAAA
ACTTTTAGAATTTGGATTAGATCGCTCCCATTTAACTTCCGTTCAATGTCTGTTATGTCT
GGGGTATTATGATATTGGGATGGGAAATACTTCACTTGGTTGGTTATTATCAGGCTTAGC
CTTTCGAATGGGTCAAGACTTGGGCTTCCAGTTAAACCCAGAAAATTGGTATATCGACAA
TTCGCCTGCTATTTCCTCTGCAGATTCTGATATAAGGCGACGTGTTTTTTGGGGCAGTTA
TGTGGCTGATAAATTTATCGGCTTCATTATGGGGAGACCCACGATGTTAAAACGGTCGGA
CGCCAGTATTCCGGGATCTAATCAGTTGCCGGAATTTGCTGGGCTCGAAGAGTTTAAACT
TAACGTAACAGATTATATGAGCTTGACGGACTTTTCTGTCTGTGATGCTGTAGCTCTGTT
CGTTGACTTAAGTGACATTGCAGATTCAATTTTATTAAATATGTTTTCGCCTACTAGCAA
GAATCGTGCCACTAATATCAATTGCGTTTTGAGTAATCTTGGAAAATATAATTTAGAGCT
AATGAATTGGCACTATAAACTACCTGATACTATTAGTTGGAGAACCATTGATTTAAAAAA
AGATCGCATACCTAATCTTTGCGCTGTCAGCCTATACTACCACTTAATTCGCATTTGTTT
GAATCGGCCATTCCTGTCCAGGAAAGAAGTGACCGCTAACGATCTTACACCAAAAACTAT
ATGTACTGATTCCATCAACGAAATAGTAACTGTTATACGAGCACACCGTACTGCAAATGG
CCTTCGATACTCGACACTATACATAGTGTATGCGGCGATTGTCAGTTGCAGTGTGATTCT
ACTACTTCGAGATATGTGTACTGATTCAGAGCTTTTGACATTGAATAACGATATGATGTT
TTTCATTGAAGTTCTTAAAGAGTGCTCTCAAACTTGGAAATTGGCTCAAAGATCGATTGT
TCTCATAGAAAACACACTGAAAGGAAAAACGAATAGTCAATCTACGTCTGAATTTGTATC
TCCAATTAGCGATACTGAAAACGGCTCTTCATCTCAGCAGGTTAGCGAGGCTAAGGACAT
AGTAGAGCCATCGGACGTACTTGATGAATTACAGAAATTTGATTTGCTACCAGAAAACGA
TGACAACTTCCAAACATTTCAAGCATTTTATGGTGGACCTCCTATCATACTATCTCCGAA
TTTATACGAAAAGAAGCTCAATGAAAAAACCTTATAGTTAACGTAATATTTATTGTTAGA
ATTCCCTCTTTATTATGTGCGAACCATATGTTAGCATGGACAGATTACTTAAATTTTATA
CAGTTTTGGACGATGCATGCTGCTGCATTATTTAATCCTATTTTATTTCCACATGGAGAG
ATGGGCTAAACGATATTGCCGCTATATGTTTGTTACGGATTCGGCAATTCAGTGACACAC
AATTAATAATCATGTATCAATTTTTAAAGTAAAAGACTAACTTAATGAGCTGATGATTAA
TTTTGATATCTATGAAAATAATTAATATGATTAGAGGTCAATATAGTACATCGGGCATCA
CCAAGGTATTGTACACATACAAAGAATGATGTTATGTAATTGAAACACATTAACGTAAAT
TATACATAACCATGCGTTTGTAACCATTCAGACCCTCAAAGAGTTGAGAAAATGTAACAT
ACTCGTTTGGGCCATGAGCTTCGCGGATGGAACCAGGTCCAAATAAATATATCTTCATTT
TCCTGTCACTTAAATATGGTATATCAGTAGCATAGGCTAAAACAACCGTATCCATTCCGG
GTATATCATAATCGAGGTATTGAGGAGGTGAATATTGGATGACTTTTATCTCAGAATGCT
CGGTGTCGAACAAATCCTCGGCTATATCACGGATTGTTTCTATATCTTCTGCAACTCTAA
TAAATACCTCAGCCTTTGCTTCAGCTGCAAGAATATTCGCGGCAGCGCCACCTTCTATAG
TACCAATGTTAATAGTGCTAGGCCCCAGCAACTTAGACTTTGGTAAGTCAGTGTCCATTA
ACTTTACACATTGTCGAAGTAAAAACTCAATGGCACTAAATCCTTCTTGGGGATATCCAG
AATGACAAGCTTTGCCGTGAGCATAAACGTCAAACCTAAAGTTACCCTTGTGTCCTACAC
CCAACTTGTTTTCAGTGGGCTCTCCAAATATAGCTACCTCCCAATCAGCATTAAGTTTAT
TAGCAACGGTTTTCATCCCGATACCATCAATTTCTTCGCCTACGACAAACAGCAGCGAAA
GATCACCTTCTTGAACTTTTCCTTCTGACATTAGTTCCAACATTGCAAAGATTTGTGCAG
CAACTGAACTTTTTGCGTCACAGGAACCTCTACCATGAATTTTATCGCCTTCAATGTAGT
AGGGTAAGAAAGGGTTGACAGTGTCGATATGGCTTGTCAGTACAACCTTGGTGTTTCTCT
GACTACCTAGATATGCATAGACGTTGTCTCGCACAGTCGGGTTAGAGGAGACACGCTGCA
ATTCGACGGTTAAACCCTTGGACTCCAAGTAGGATTTTAAGAAATCTGACACATTTACTT
CATTCCCACCAAGAGATTCTATTTCAACCAAAGATTTATGAAGAGAAATCAAGTTGTCGC
CAGCTGGCAATAATGATTGATGTGAAATAAGCTGTACAGAGTCTTGTTCAAGTATGGAGT
GTTGCCCCCAAGACAAATAACCAAAATTTAGGGGACCCGCCAGTACGGGTGACATCCAAA
GGTGGTAGCCGATAACTATTAAAAGGCTCCAAACAGAAATTTTCATTGTCATACAATAAA
CGTTATTTTTGAATTTATGTACAATAGGCAGACGGTTATTGAACTCGAGCAGTAATGGGA
GTGTTCATGATTTTATGGTGTAGTAGTAGCCTATCTATTATCTAACTTCCAAATTTTAAG
CGACAACCCTTGGTAGGCGGTAACAATTTGATTAGGATAACTAATATAAAGAAGGATTGT
TTTATGGTTGTATTAAAATATAAACGCTGAAATTAGTACTAAGTGCAGATACCAGTGCTT
AAGACGCTGATTTAGTATTTGTGTTTGCCTGATTTATACATGATTTCGTTAATCAGCGTT
AAGTCAGCGTCATACTGGAAGTCAGCTCAATGGAAATACTTACATTAAACATTACTATAT
TATACAAAGAGGAGTAAATAAATTTTGGATAGTAAAATTAAATTTAAAAAATCTCAACAG
GTGATAAGAAACTGCAATGCTTGTAGCGACAAATTATGGTAATGTGCTCAGCTTTTGTAT
TATTGACAAAAAGTATACAGTAATAAATACACCCATAACCCTCAAACTATTGTTTACTAT
CAAAAGAATCTAACAGGAAAAGCTATTAAAAGTTTTTTAAGAGAAACAAGTAAAACGAGG
TAAGTACAGAAAAAGGCTTTATACGCACTCAATCGTATTGAAGCAAAGTTGGAACCCTTC
TGCGATCTGAAACTTGCAATGAAGTAAAGGAAAAAAGCCATACTGTCGAGACGATGTGTA
TAATGTCTTAAAGAATAAAACTCCGTAAAATATTAGAATATTGACGTCGGATATGTCCCC
TCGGTTAACAAAACTTTAAACTTCATGAATTTAGGAATATTGCGGGGAGGGAATACATTA
ATAATTCAAACAATAGGAGAAAGAAATCTTTGACGGCACACTCAAGAATAAGTCATGGAC
TACGGACTAAAATTATCAAATTTCTCAGTAACTTAAGTTGTTTTTTCGTTCCATCATCTT
ACGAAGTAGATTGGTTTAAGTATAAATAGATCGATTAGATCTAGTGTCATTTAGATTTGT
TTTCCAGTATTTCAAGGTATATCTTATTGCCAAATTTTACTCAAATTTTGTTAAAATTGA
AGAAAAATTGGACATTTCAATTGAATGCTACTGGGCATATCCAATTTACGATTTCCCTAA
GGTTCTGTAAGATCATAAAACACTTTTCTTTTGCAAACCTTCATAATTTCTATTCACTCA
TCTCTGGAATCATTAATTATACTCTCCCTACTAGAATCTTGTATTTGTAAGTTTGCTATT
GGTTTGGCTATGTTGAGTGAAGTGCCTGCCCTTAAAATTGGGATACTTAAAATAAATTGG
AAGTAACATCAGCTAAAATATTTTTTTACCTTTTATGAAGTAATAAAGTCATCGGAAATG
CTTGACTATGCACATGAGAACATTGCCATAGATGATTGCTGGAAGACGAAGGAGCGTCAA
GCCATCACTAATTAACTAATGGTGAATCCTGATAAAACCTCAAGAGTGGTGTGTTTTCAT
GGCTCAGGAAGTCCATAATTAAGTTTCAAGTTGATATTTTTCCAGTACTGTAAATATACT
TGCTGTGGCTATGTAGGATCCCTCGATCATGATAAACAAGACGCTCACGTCTGCAAATTG
GGTTGTCAATTATTTTACGGAGAATCTTGCTACAAAGAAGTTAGTGTCAAAAACTCTTTA
ATTAATTTCGGCAAAATCAAAGATGTCAAATGCCCTCAACGGAACTAGTCGTCCCATTTT
TTTACTCTCAGTGCCTGCAATTGAGGTAGCACAATTACAAACTCTTGGAGAAATGTCGTT
AAAATTTTTAATAAAATTAATTGTAAAGATGACTGATTGCCCACGTCAAAGCTTCAGCTG
TAGTGAATTAATTACAGTTTTACCTACTGTTCAGAAATTGACATTTTAGCAACGGCTGTT
CTTTAAGGACAAAAAGCTACCTCTTCTGATATTCTTGAAGTTATAAAATGGTATAAACTG
CCACCAAATTCACTATGTCGGCTTTCTATGATAATTCCTCTAATTCTTCACAATGATGTT
ACAAATACGCCTCAAGAAGATTTCTATCATCATCAGCAAAGACGTTATATCTATAAGCCA
AGACTGAATTTAAAACTATTTATGAATGCATATAGCGCTAATGATGTCGATGGAGACACT
CGAGTTCTCCCAATGTTTTTTAAATAATGACAGGGTTGTTTCGAGTATGATTATTACGAG
TAGTTCATGTTAATAGTTATTCGAAAATTTCATTGATAAACCGGCCAAACCTCAACTGGC
TTTGAATACTAGAGACTAAAGGAATAATAACACCATGAGTGACAAATTTATTCAATATAA
TATTTCGGCTTGTTTTACAAAGATACAAATACTGCAAAAAACATAAATCTAATGCACATG
ACAACTGGCTTTAAAAGTGCTAATTTACTGTTGCTAGCTACATAAGTAATCGAATATCGT
GTGTGGCTCATGAATTTGCTTTTAAGCTTTCCTAATTGATTACAAAATTTTAATCTTCCT
TTCCTCATCTGGTACAGATATTAAGAAATTTACGGCAGAAGACTTGGAAAACACAATAAG
CCTTAGACCTTATTTATATGTTAACCTAATATGTCAAGATTGTTTGCTTTCTTATCAATG
TTATGTGCTTATTGAGGTTAAAATATATATTTCCTAATTAACATTTATCAAATTAAATAA
ATTTCTAACGGCATTACACATGTCTCGCATTCAAAGAATAAAATAGTAGTCATCCGATAA
ACCTAGCTGACTCAAATTTTTTACAAACTAATTTCGCATAAGCGCATTATGAGCTTCCTT
GGAACATATGGGGTTCGCCCTTGTTAATTGGCTTGGGGGCTTTTTCTTCCATCTTCTTCA
CTTCAGCTTCAGTAGCCTCACGAATACGGCGACCAAGCTCTGAATCAACACGAGTAAATA
CACCGTATTGGCGTTCACGTACAGGAGATATAGCACCAGACAAGTGACCGGCAACGTTCT
TAACAAAGTTATCTTGCTGTCCAGGTTTCTTGCCCAAAACATTTTGCCAAAACGCTCTAG
GTTGCTCAAAATCAACGTCGGTAATTTCGTCCATATGGTAAGTAACTTGACCTACCCACT
TTTCGTGACCTTCGTCAGGCTCATATTGAACTTTAGCAAGTGGTCGGATTGAGGATGGAT
AGTTTGGCCAATTTCCTTGGTTTCCATTGACATTCATAGGGCCGTCACGAGAATAGTTAA
AGACAGGACACTTAGGAGAATTGACGGGAATTTGCTCGAAATTAGCACCCAAACGATGGC
GGTGGGTATCAGGATAGGAAAATGTACGTACTTGCAAAACAGGATCCGCTGAGACTTCAA
TACCAGGAACCATATGAGAAGGAGAGAACCCAGCCTGCTCGATATCTGCAAAGAAATTGG
TAGGATTCTGATTCAAGGTAAAGCGTCCAACCCTTTGCATTGGTACGTCCTTATGAGGCC
AGACCTTAGTAAGATCGAAAATGTTGTAGCGATATTTTTCAGCCTCCTGAGGGGTCATAA
CTTGAACGTAAAGCGTCCAACTGGGGTAATCACCACGTTCAATAGCTTCGAAAAGATCTT
GACGAGCATGGTCGGGATTGGATCCATCCAATGCAGCGGCTTCTTCATTTGTTAAACCCT
TGGTTCCTTGATTAGTAATGAAATGCCATTTGCAATAGTAGAATTCACCCTTATCATTAA
CAAATTTGTAGGTATGACTGGAAAAGCCATCCATGAAACGGTAGCTATAAGGGGTACCAC
CCAAGTCAGAGAAAAGAATCATAACTTGATGGATGGACTCTGCGTTTTGAGAAAGGTAAT
CCCAAAACATAGTAGCATCCTTCATATCATTTTGAGGGTTACGCTTCTGAGTATGGATGA
AGAGAGGGAATTTAGCGGGATCACGAAGGAAGAAGACAGGGGTATTGTTTCCAACCATAT
CGAAAATACCTTCATCGGTGTAGAACTTTAATGCGAACCCACGAGGATCACGAGCAGTAT
CAGGAGTACCCCTTTCACCACCGACGGTGGAGAAACGAGCAACCATAGGGGTTTTCTTAC
CAACCTTAGAAAACATGGTATGTTTGGTATACTTGGTAATGTCGTCGGTGCATTCGAATT
CACCAAAAGCACCGGAACCCTTTGCATGGACGACACGTTCAGGAATACGCTCGCGATCAA
AGTGTTGAAAGACGTCGATTAAATGGGAATCTTGAAGTAAGACAGGACCTCCCTTACCCA
CACGAGCCGCAGCCATAGGGTTAAAAATGGGACAACCGGTGTTGGTGGTGTAAACAGGGA
CGGTATTTGAGTCTTTCGAGTTCATTTCGCTGATGTTTGAATCCTTAGACTGAGAAGATG
CAAATCTGTTAAAGAGTAGCTTATTATTGTTAATCTTGGAATTAGTTGAACGACGAGCAA
ATGATTTTAAACTAGCTTGTCTACCAAGACAGTAACGTTCAAAGATGCGAAAAGCCGACA
CTTTGAAGAGTTAGGAGGGGAAAAAAAAAGACAGTCAAAAAATTGTGTTTTTTTAAAAAA
TTAGTGTCGAGTCTTTAACTAAATCACTCAAGACACAACCACAATTTCTATAATTCGATA
TTCGAACAAGGGAATTACAATCACACACACACAAAGAAGAACTTATAGTATTCTTCTATT
CAAAAGCTATTACTTTTACGTGAAAAGCTGTATATTCAAGCAACTTGCAATTGCCTCTAT
ATATATTGTCTGGTGTAGAATTACCAACGTCATATTTGCACAATAGGAAAACTCTTACCA
ACGCAAATGGCCGAGATTCCATTGGCTTAGTGAGCCAAAGAGCATCATTATTAGCGAAGC
TACAATGACAAATTAACTTCTTCTACAGCCTATCGTAGTCGCCAAAATCCACCCTTCAGC
CAATGTTTACGATGCGCTCATACCGTTACTTGGCCATATCAAATCTCCCAACACCATCGC
TAACGTAAGCGGGCAAATCCCATCGTTAGCGATTAGTAAAACCAGCGTTTCTAGACACAG
ACGCTGACATGAAATTCTACTGCAAGTCGATATAGAGGAGAAAGATGCTTAATAAAATTA
AAAGCTAGACTTTTCAGTCGCAAACTTGTGCTGGACATGCACCCTTTGGAACCAGTGTTT
TTGGTAGATTAGCAGAGTATAGTGTGTTTCCTGGGGAAGTAAATAAAACAGATGTATGGT
AAAATAGGATATGCAAGCATGTAGATTTTGGCCTGTATTCATGCGGTTTGTTTAGCTTGA
AGAATTGATTTCACAAAAGTATGGTTTAATTTCAAATGATGTCGGGTTGATGTGCTAAGA
TCGGGAAATGGGTGAGTGAGAAAAGGAAGTTATGGTAATTTTATGATCGATTAGTTTGGA
AACGTGTTTTATGGGCGCATTGTATATTTCTTAAATTATAAATTTTTTCTATTCTATATT
AACTGAACTGAGAAAGTGGATTCATTGTGCACAGCTTCCCGTAGAGGTATAATGTGCACA
AATCGGAAGTATGACTAGGAGAGTGAAATAGATAAGGAGGTTACTGAAATTAGAATACTT
TCGTCCAATATACTTAGGAGTGCAAGTCTAAGGTCGAAGAAAGGCTGGAAGTGAAACAAG
TCCCTTGCTTACAAAAAAAAAAAAATGGGAGATGCAAACAATCTAAGGACCGACAAACCG
TAGGTATGGACGGCGTGTAAAGGCAATCCGTAGGAATGTGTGAAATAGAATATGATACGT
TTAATAAAAGTCCTTCTTTTCCTCTACATCACAAATTTCAAGCAAAACGAAGTAATAATA
ATAAGGAATTTTTTCTTTCGTTGGTCTGACTAATTTTTTAGGTTCGATATAAACACTACG
ATTTCCATGCATGTTTTAATTCAGCGGATGAAGATATAACCCATACGTTGTTGTTTCCCA
TCGCTCACTCTACATTCGCTTAAATAAACTACTACCATTTGACTCGTCAAACAAAGATTG
AAGGTGGTATTCACAAGCTTGTTTTATGTTGAATTCAATTTTTAGTTGGTAAAAGTACTT
TAAGCATAAATGCCATTAACTGCTGTTCATGAAAGAGGGGACGTTATAGGTGGCAGAATT
AAATTTCACTATATAGAGAACTATAGTGTTTTTTGGTCATCATCAGTAAGTGCAGAAACA
GCATCAACTTAGTAAACAAAATAGTTACTTAGATTTCGCTTTATTCTTTATTTCCCTCTC
CAAGACTTCACAAAGTCCTCGAAAATTCACGATGCTGATAGCTTCAGCTTTTCAGCACCA
TTTTTTCTTACTTGAGGGCGAGTTGATTAAATTCATCCTCTGCAAATCCTTCTTCTTTTA
TCTTTTCTCTCTAGAACGTTTGAAAAATTAGTTACACACGTCCAATTCCCTTAGTTGGAA
TTCATACCTGTTGAAACTCTTGCAATGCTGCTAAACGCCGTTGCCTATGAGAATAATAAG
ATTGGCCAAGAAGAACAGTGCCTCCAACAGTGCCGAAAATTAGAATCGATACCGATCCCT
TTTGTACAATGTCGTAAATTCGATTTCTGTTCATAACACTGACCTAGTAGTTGTTAGTAG
TCGTGTTTGTCAGTTTACCACATTACACAGCCTAATCGCTTCAGTAAACTTACTGAGTTT
TCTTTATAATTTAATATGTTGTTAATGATTATTAGCACTGATGGAATGTGCTCTTAAAAG
GTCACCTTTAGTGGCAAAGCTCTTTACAGTTGGGTTTTGTAGAAATGAGGCCTTCCCATA
TTCTACCGGCTTTCCGAGCTGTACCATGACGTTCTTTAAAATGATTAACAGGAGGTTTGA
AAGTAGTGCTAAATTACGTTAAAACTCAACATGATTAATTCATTCGTCTAGTCATCACTG
CTCGGCTCACTAATATCGTTGGTAAGTAATAAAGCGATAAAGGGATCGAATTATTATTTT
AAAAAGTATTCCGGTGGGTGATACTATTCATTCATTATTAGAAATAAATCGCAAGCGTTT
GTTGTAAATGAAGGTGTCTCAGTTATTTCCTGGATAATAAAAGTTGAATCTCAAATTTTT
TTCATCTCAATACTTAAAAAATAAATCTTGTTACTGAGTGTCATAGTCGCTACATAGGAT
TCATAAACTGCAACTTTTATTTATCTTTTTCTAAGCACATTAGCTTTAAACGGATCCGTC
TGCCGCCTTGAGTAAATCAGCCAAAGATTTATAAAGCCAAATTATTTGGCCTTAATCAAT
GTATCGAGTCAAGTCTAGATGTAGCCTGTTCAGTAACGAATTTGACCCCATTTTTCCAAG
AGAAAAAAACGGCCGGCATTTACAGAGTACAACATATGAGGTACCAAAGAAGAAATGTAA
AGTTTAAATGAAATAATTCAATGATGAAAATGATCCAATATGACGAAAAAAAGTTTCTAT
ACTATTGAAATTGAAGAAAAGAAAGCAGGCAAATTTTACGTGTTGAAGTATGTATACGTC
TACCTTTATAGAGGATTACACAAACGTTTACTTTGGATTTCATTTTCAATTATTTTCAAT
TTTCTTGATCATTTTTGGTCACTTTTGTCAATTCTGAAATACGTTTGCTCTTCATATACT
TATTGTTGATGTACTAAGTAGCTGAGCATTTCGGTAAGTCAAGCAAGAGCAAAACTGAAA
TTGACGAAATAAAAACTGTCTCTTATTAGTAGGAATAGAAATAGAAATAAATGACTCACA
AAGCCTTAAGAAAATTTGTTTTAAAATCTTATGAACTATTAAATTTCAAAGGTTTTGTTT
ATTTTCATAATCGTCGATTGGTGTTCCTGGTATCGATATTAAAACAGCAACTAGTTCCTT
TTCATATCACGGTCTAGCTAATTCTCGAATTGCTTCTTTTTGAATGTTCTTCTAGGATTT
ACTCTTGCTTGTGGTAAGATTGCAACAAATGACAATGAGCAGTAGTAAATATAGTACAGT
GCAGATATTGCTTTTCAAATTAAAATTTAGGTGAACCTCAAACATGATTTCATTTATGGC
ATGAAATTGATGGTTACATTTCATACAATTATCAGAGATATTAAAGTAACACTAAGCAGT
TCATTTCGGTAAGTTTTCGATCATCTTTATTATCAAGATAACCGAAACAACCTTAGTAGC
TGCGTCAATACACTCACTACTCAGTGACAAAACAAAATTTTTAGGAAAATTAAGCCTTTG
TCGTTTCTTCCTCCAAAGTCATTTTCATGTTTACTATTTCCACATTGCCAAAATTGTTAG
TAACCTCTATTACGTGGTTATAAAAAAGAATTAAAATATATCCAAGCCGACTTAGCAAGG
ATATGTCTTTTCATAAACTCACATACGGTTTTCAACCCGATCGTTTAACATCACGATTCT
AACCCTATACACCTAATACAGTGGGTAAAACGCAAAGTCTCTAAATTTGATCTTATGCAT
TCCATACACAGTTTAGTCAAAATCTTTTAAACCTATACAACTGACGTAATAAAAAAGACA
GCAATATATAAATTAAAAATTCAAGCCATTTCAATAAAGCTTGAAAACCACAAATTATAA
CGAAATTTACTGTAAATAAGTCTAACGCCTTAATGTGAATAAAACGATTGTTAACGCAAC
AGATTCGACGCAAAGTATAGTAGATAATTTAAGCAAACTTGTAATATTGGAGTAACTTAG
GCCTACTCGATCAAGAGTCGTCTTTTATATCAACTTGGAACCTTATAGTGGATTTGTTTT
TGCGCACATTGCGTTCCTTAACTTGCTTCGCTAGTAAGCACACACACTCGTAGCAGCACA
AATTTTTACGGTAATATTTTGGATCGTTGGATACACATATTTAAGAGACTTTAAAAAAAT
GTCAAGGCATCTGGAAACCTCCCTTAATAATAAAGAATTTGTTTTAAATTCTCTAGAGAA
AGGTCTTCGATTAGATGGTCGACAGCTGTCAGATTTCAGATCTTTGGAAATTCAATTTGG
AAAGGAATATGGACAAGTAGATGTTTCATTTGGTCATACAAGGTATATTTTTCTCTTTTT
TTAATAATGAACAGCTTTTACTAACAAGTACTGTAGAGTTATGGCCAGGATCACAACTGA
AATTACAAAACCATATACAGACAGGCCATTTGATGGCATCTTTTCTATTACTACTGAACT
CACTCCTTTGGCATATTCTGCATTTGAAGCTGGAAGGTAAGAAATGATCTGTATTGTACT
TTTACTTTTGTCAGCCGAAGGGTTGATTCAGTGGCTGTTTTTTTTTTCCACCTAACAACA
TACTAATAATCACAGAGTTTCTGATCAGGAAATTGTTATTTCCAGACTAATTGAAAAAGC
GGTCCGCCGATCCAATGCATTGGATACGGAGTCCTTATGTATAATATCCGGTCAAAAGTG
TTGGCACGTTCGTGCTTCGGTCCATTTTATTAATCATGATGGAAATTTAGTTGATGCCGC
TTGTATCGCAGTAATAGCTGCTCTTTGTCATTTTCGCCGACCTGAGCTTACTGTTGTGGG
TGAGGAAGTGACAGTACATCCAGTAGAAGAGCGTGTACCCGTTCCTCTTTCCATATTGCA
TATGCCTATATGCGTGACCTTCAGTTTCTTCAATAATGGCGAATTAGCGATTGTTGACGC
TACTTTAGAGGAAGAGGATTTGTGCAACGGAAGTATGACTATTACACTCAACAAAAATCG
AGAAGTCTGTCAAATATACAAAGCGGGAGGTATTATCATCGATCCTTCTAAAATTATATC
TTGTGCTAAGACCGCATTTGATATAGCTGTTTCGGTTTGTTCTGTTATTCAACAAGCTTT
AGATGAAGATTTACGGAAAAAAGAGACACAGTATTTAGGAGGTTCGGCAGAGAACGAGCG
GTCATAATGCTAGTCTTTTACTTAAAAAAAATAAAATAAACTAATTTATTCATTCGTTTA
ACAAAAAATTCTAATTGCATTCGAGTTCGTCGTGTTGCTGAAGGCGTCATTCCGCTAAGT
TCAAGTACTAAAACAATGCTTTGATGGAATGGGATGATATTTCTCTTCATTTGATTAACA
CTTCGCTATCCTTTTTGTATTTAAACCTATATTGACCTATACTAAATGTTGGCATGGAAA
ATCCTTGTACAGGAAATGAGAAATTAGGAACGCATCTTGCACTGAATATAGCTACTACTA
TGTACTACTAATACAAGTTTTTTGTAAGACATAAACAGTGAATGCCACAAGACTATTTGC
TCTTTTATGTCCTGAAATATTCCAGATATTTTAAGATTATTTTCAAAATTCTATGTAACA
CCGCAGTTCATAGAATAATGTCAATAAAAAAAGAGCTTTATCACGTCCTTTCTCATCAAA
ACTAAAAAAACTAAAATAATATACGACGCTAAAAAATAAAAAGAGAAGAGAAACCATCAA
ACCAACCAAATCCGTAAAGACTAGTTTAAAAGCAAATTTGTAATATAATGAAAAAAGGTA
TGCCCTTTAAAGTTTAAAAGCCTTTGAATAAACGATAATGTAAACAGCTCCAATATTCAT
GCAACAACGTATAGAGCTGAAAAGACTAATAATCAACCAAATATGCTCAAACCAATAATC
TGAATAACGTAAAAAAAACTAAAACTACTTTCCTATAATTAAAAAAAACATTTTTTCTAA
AATGAACAAAAAAGTAGAAGATGCATAAAATACCGATGCCGGATTCCAAAGACGAAATGT
ATTGATCCCGAGTTAAATCACCAAAATACGTATCTACGATGCGAGACAATCTGAAAATAA
GAATCAAGAATATAAAGGAATTGAATTGCTAAACAATAACGAAGACTGCACAAGAACCAA
ATAAAGGAAATAATTAAGATAGTTAAAGGGGGGATAGAAGGAATAGCTTAAAAGGGATAA
GTTATAAACCTGCTGTCAAAAGAGTCGAGTAAACTAAAATTAAAACCCACTAAGTGAATA
GTGCCAAAAATTTTAAAGGAAACCAAATAATTTTTTTTCAGTCCTCAAAACCTTCGCGTG
TTTCAATAGAGAAAACTATAAGAACTAAGAGACATCACACATTTGAAGGCGAAAAAGTAG
TCCTAAACTAAGGAAGCACCACTCCAAAAGTAAGTAAAAAAAAAGAAAATGAAAAAGATA
TATGAATCCTAAACAGACTTGAATAAAATGTGACACCACTAGTTAAACTAAACCAAATTT
TTACAAAACATTGATGAACGGGAAAGGGGAAAAGCAAAAGGATAAACTGAAGGAGAATGA
GCAAAGTAACACAAGTCCAAAAAAATCTAGCAAACAAGAGAGAATACCTTGGATGCAAAA
CCAAAGTACGAAGGCAAGTACTAAGAGTTTAATGAGAACGACGATCTTTTTCCATTTCTA
ATTGCTGGTAGAGTAAGAAAAGGGCTTTCTCATTTTCCTCGTGTGTACCTGTAATGGTGA
ACATACGTTCGCCTGTCTCATCATGAGGTTCTTTGGCAATGGAAATCTTGCTACCGCTGG
TACGACGGATTTCCGAAATCTTAGATCCTCCACGACCTATTATACAACCAACCATATCTG
CGGGAATGCTAATATTTTGGGTAACCTTAGGTTGCTGCAAGAAAGGCATTTGGGTAGCTG
GAAAGACTTGAGCACCGTAAGAAACAAAGTTTTCGGGGATAGCTTCACCAGAAGTCGTGG
AGGGAGCTGCTGGAGGGGAGACTTGTTGAGGAGATGCAGTCGACGCAAGAGAAGGAAGAG
GTTGAGTCAAACGAGAAACGGGATTATAGAAAACGGTACCGGCGCCACGCTCCCAGTCAT
CAATTAAGCATTTGCCAATTTCCCAAATGGCAGCATGAAGATTATCGACTGTACCATGGA
TTTCAACTGTACGCTCAGTAGACTGTGGAAGCATGTCTTTGGAAGCAATCATACGGCAAC
TACATTTGTCCTGAATAAGCTTGATACGCAAACCATTGCGGCCAATAATACTACCCATCA
GAGAATGGGCGATCAAAAGACGAAGTTTGCGAGGTGTGTTGGCGTCGGAAGGTGTACCAT
CAGGGTTAGTACTGTTCTTGGCAAAAATATCGATGATGAATCTATAAGCGCGAACAACAT
TCTCTAGTGGTCCACTAATAGTTAAAACACGATCATGAACATTAGGAACAGCCTTGGTAA
CGCCGGCCTTGACATTTGTAGTGCTTCTGAGTTCGGCAACGTTTTTTCCAGCTTTACCAA
TAATGATACCAGCTTCACGAGTAGAAAGTAAGGCTCTCAAGGTAAGTTGTTGAGTAGCAT
AGGTGGCATCATCCATCGGTGGCTTGGCAGAGATGGGAGGCACTTGAGACGTTGGTTCGG
GTTGGTTGGTCATGGACTGTTGAATAGTAGAACCGTTAGTAAGAGTCGATAGAGGTGTAG
AGGGCTTTGGAGTAGGTATGGAAACTTTAGCAATGCCAGTAGCAGTAGAAGTGGTTTCGT
CGGGTTCGTCTTGAAACGTTACGTCAAAAAAAGAGTTCTCTTTTTCCTCGATGTTTTTAG
GAATGCTGAAGTGATTGTAAGCCATAGATGTCACTGGAATAGTATTGGTTAATTGAATAG
GACACATATGCGTTTCTAGGAGGAGAGTAGAACCTTTTCTAAATTACTTCCTGAAAACTG
ATTAGTTCAAACCTGCAGGGATTTAGCGGAGATTAAAAAAAAAAAGGAAAACGGATTAGG
CTCCTTCTAAGCTCTTATTGCAGTTTCTTATAAATTGAAATTGCAATCAATAGCTGTGAT
TACTTCGACAAAAATGAAGTAAACGACCAAGGAGAACGGAGTAGTGGTAAACGGGGTGTA
GCAGTGACAAAGAGAAAATTTTCTGCAAGTAAGTCTTTTGGTGGGGAAATAACGAAGTTT
GAAGAACGTATAGTAAAGTCGCACAATTTACTGATAGGAAGTGGTAGCGTAGCTTTACGC
CTCAGTCGTTATATCTTTGGAAGTGAAAATGATGAGATTAATAAATGAGAAGAGCATTAC
AAGAATGGGTTTTTTAAATAATCGTAAATTTCCTAGCTAAAGCTAACGAATGCTGCCAAG
TGAAATATCATTCTTTTAGTCAATATAGCAGGTATTAACGTAGTTGTTTTCGTTGGCCTT
TGCTTCGGTATATAGGATAGCGTGGTTCAAGCGACTTTGTAAGATCAGATGAAAGATAAA
GGGCAAAAACCTAAATAGCGTCCATGCATCAGTGGAACTTTCTTTCTTCAGATTACGTTA
TATGGTATAGTGAGCTTTGAAAATCGTTGAAAAAATTCGAATTTAATGGTGCAGAGGCAA
AGACGATATGGACGTTCGGAAAAATGAAAACTATACTGGAGGAAGTTATCTTTATTTGAT
TCTGTCTTCGTAATTAAGCTTCCTTCAGCTTCGAACTTTTCATTTCCTAATTCGAATACC
TATTTGTTCACCCGTACCTCTTTAGGTTTATATTTGTTCTTGCAAACTGTTCTGCGGCGA
TATGAATTTTGCTACCCCAAAGTTTACGTAAGCCAAGTTTGTCGTAAATAAATTCGCAAA
AAAAAGTACTTTGGATGGTGCAACATGGAAGAATTGAACGCCGTTGAAACGCTGGTATTT
TTGAACATGAAGTATCTCAGTATTCAACCCAAAGTCATAAAAATTCTTGAACCTTTAGCT
TTCCAAGCGCTGAATGAGCATACTGGGACACATTTTGAAACCATAGACGCAAGTAATAAT
TGCGTAAGTTATATAAAACTCATAGAGCCAACAAAGCTAGTAGCATTTACTTCTTAATAT
TATATTGAAATTCCAATAAATAATCTTTGAATATCGTTTGTATGAAATACCCGAGAGCAA
TTGCGGCGCTAAATTAAACTGAATGTTCAGTTACCAAGATTTATGTCACTTCATAGAAAG
ATATAATATCACAGTAGCGTGTACCATTCTTCTATACCTCACTGAACGAGGAAGTCTACA
ATTCTGCTTGGCCTAGCACAGTGTTAGCGAGGGTGAAGAATAAAATTATGATGCTAATTA
CCAAAACGGTGATTTCAAAAAAAGTTGAGGAACTTTCATATTTTCATTTTTTGCCTCTTA
TAGGACGCTATGTATTACGTTGCGTAACTTTGACTTTTGCAAATACTTGGATGTACCACT
GTCTCCATGTTTGTTTGTTGGTCAATATAAAACGTAGTATTAGACATTAAAATATTGGTT
TAATTATTTCATTTAGAAAACTCAATAGAAATTTAGCAAATATCGTCAACCAACCTAGAT
TGATCCTGTTTCACGCAATTCGGACTATATGAATCGTTTTTGATTGCTTTCTAGACTTCA
TAGCATTATTACTTACCCTTCTACTTTTTTAATACCTTCGAAATTGTCAAATTGACTCAT
TATTGCAAAAATGCTGTACAGGCTCTCCGAAAAACAGCAGACAGACTTACGGTGTAATAA
ATTAACTGTCGATGGATTTGAGCTGGTAAAAATGTTAAAGGAATTACGATTACATAACAG
GAATATCAATTTTTTGGAATTTCTTCGAGGTGTACAGATTGTGCCGAGCGACAGTGTCTT
CTTGGGCGAAATTGATGAAAACAGCCATACTCAAGACAATACAACTACTTCTATCTTAAA
GGAGAAAGAGCTATATGATGGTATTCCTCTGCTTCCATCAATGGCAGGCGTATCCATGGA
CCCTGAGAGAGAAAAAAAATCAGAGTTACGACTAATGAAAAACCAAATCAGCGCTATAAT
CAATATACTCTTCACAGTAGTAGGAACGGTGACCGCTGTTTGGTACTGCACTTCATCTTT
ATCTATTGAAAAGGTATGAATTAAAAACTTTCGTTTTGTTCCTGGGAGACCTTTGTATTG
ACTTAATATTATTTAGAAAATTGCGCTATGTGCGTTTTCAGCAATCTTGGTTCTAGTAGC
AGATACGTTTCTTTATGTCCGCTATCTATCTGCACAACCCGTACGAACTTCAAAGAATCA
TACTCGACAAATAATATATACATGGACAACAAATGACCCTGTTCTACAGTCAAATGAGCA
GCTAGCTATAGAACTGGGAGCCATTCCATCTTTGAAGGAAAAAAAGAACCAATAATTATA
TTCTTAATTTTTAGATGTTTTATTAACGAAAGTACCTTTGATGTTTTCCTGTAGATGATT
TTTATAGGTTGTTTGTCTAATTGATCATAATGGCATACCTCTCTATGTGTTAATTGAAGG
GCAGGCACCTATGGGCACACTATAGATAAAAAATAAAAAGTATTTAAGATAAAAAATTCG
AACTCATTTGGCTTTTAACGTATATTTCATCAATTAATTTCATTATAATTAAAGATTTAG
CAACATTATTTCAATTTAATTAGCCATTTGGTATTAGATTTATTTGTAAGGAACACAACT
TACAAATTTATAAATAAACAACAAATCAACCCCCCCTTGTAAAAAAATTAAAAAAAAAAA
AAAAAATAGAGAGCAACCTAACCATTGAGTTACCAGTGAATTATGCAAGGCGCAACTTGA
CCTTAAGTTTCTTCCATATAATCAATAGTGCAAGCACAGACATAACGTTTAATATTAAGC
ATACCGCAAAAAAAACAACAGGTGAGAACGAGCGAAATGCACCGCCAAAGATAGCACCAA
CTGTGTCGGATAAGGAAATTGATATTTGCACAGCGACGTTACCTATCAGGTGGTACTTAG
GATGTAAAACCTTTGTCAATAAAGAGACCGAAGGGGAATTAGCAATAGAAGATCCAAAAA
AAACAAGGGTGTAAATAATAAAGTAAGGTTGTACGAATTCCTTGCCTGTATAGTGAATAG
TTATATGAATAACCATGCATACGATGTTTAAACAACAACCCAACAATATGATATCTCTGT
CAGTCAAGTAACGCGTCAAATAGGAAAATATTAAAAGCAAGGGTACGTTGATAATTCCAG
CCAAAGAAAGGAAGTTACCTGCTTGGAAGGATGAATAATTATAAAGCATAGAAGTGTAAA
TTGGAACAGATGCTTGGTATGCATTTAATAGAAAGTAAGCAGAGAAGCCAGAGAAAGCGA
CAACGAAAATAACAAGACACCCCACAAATCCTAGTTTTGAATTGGTATCCTGTTTGACAT
CATTAATGACATGCTTCTCTTCGACTACTTCTTCCTTTACGTCCGTTTGCGGGCTCAAAA
CCTCCCGGAAACAAGCAAAGCCAAACAAAAACAAGCCTACCCAAATGAAAGCCATTAGCC
AGTTACCCGAAGTATATTCATTCCAGATATCGCTTTGAGACTTCATTGAAGACTTGGCCA
TTAATCCTCCGATGAATGGACCAGCTGTCAAACCAAGCGTTGCCATGACTGAGTTGACCA
CACCCATCGACGTTCTATATTTGATGCTGATCAAGGCTTTATCTGTGAAATAGCGCTTGT
GGTATAAAAACATGGTACACGCAACACCCGTAAAAATACGACTCACAAGAATCAAGGCCA
CACTTTTGGCTTTATCTGCGAGTGCATACATGATATGACCAATAATGCAGCTTATACACG
ACATTGTATATGGTCTTCTATAAATCGTATATCCCTTGGCAGCTTTCGGAGTCGAGAATC
TCAACATGGGATACAGCAACACAAGGGCAGTGATTGTGGGCAATCCGATAATTACACCGG
ACAAACCATTTCCTCCCCCCAGATGTTGGACAAATCTCTCGGACGTAGGAACGACAATGG
TGAATGAAATGCAAAGAATTGTGTTATTTAACAGCATCAAAGCCGCACTGATGAACGGTG
GTTTATGCGTAGCAGCCGGTGAGGCAGAAGGGTCATTGGAAACTAATCTTACAGATTGCT
TGTATCCCGACTTTTCCTTTTCATCAAGAAAGGATGAGACCGAGAGGTCTTTTTCTAAAT
TACTTTGTTGCTCCATAATATAGACTCAATGGATCCATTCAAAAACCTGCTCTACTACGA
AAACTGGCCTGTGGAATAAGGTATAGAAGGAACGAGAAAACAAAGAGAAATTCTTTGTTG
TTTTCAAATATTTTGGTGTGAGTAAAGGAAGAAAGTGGAATTTCAATAGAATAGCATGAC
TCGTTTATTTTATATGAGATCAATTTTTTTAAGTTGATGATATCCGATAATTTTCATCAT
CGTATAGAATGGATAAGAATTCCCAAAATAGGATATCCACGGTGCTTCCCTAATTAAGCT
TTCCGTAGTGCGGAGTATTTTACCATATATCAGTCATTAGTTGTACGGCTACTGTACTAG
CTCACATGGTCCAGTGGTTAAGACTCATCGTTGTGGCCGATGCGACCCAGGTTCGATTCC
TGGTGTGGGCAGTTTATTTATTTGTTCTTTTTTAAATTATTAATTACTTGTATAAATAGG
AAATAATCAGCGAGAGCAAATAGTACAATTCAGTTATGGCAAGTACAAAAACGCAAAGAT
AAATGCAAACGTAGAAACCGGTAGACATGATGGTAGAAGGAGAATAGAATTATGATAGGA
TATGATGATAAGTATCGAATAGAAATGTCTTGCAAAGTGTGTTTGGCAGATAAGCCCATT
TGAGCGGTCGAATATTTTATGCTTTTTTTCAGGGCCAGCCGGCAAGATCACCTGTCTATT
TGTCCGTTGGCAGTAAGCGTTTGCTCAAGATATGGATGCGCTTCAGTACTTGAAGATTTA
CAGACTGTTCGGGACGGAAAGACTCATGACTGTTCGGGTCGATCATTTTGGCTACTATCC
GTCTGTCTATGATAACCAGTGTATGCATGGAAAAAATGTATCGTAAATCGTTTAATGAGA
ATAGGGCATAAAGCGTTATTCAACGGATGAAGAAGGAAACTTGACAATGGCGATGTTGAA
AGACAAGCTATGTGAGATAGCAGATTGGTTCCTTGCAGTACACCAGCCCCTACAAATACT
ATGATTCTTTTAACTTAAACATCCTGCTCAGTTCCTTCTAATCAATACTTGGTTACACTA
GTTTTTTGGCATAATGAGTTCTCAAACATGCTTTACAATCTCTCTTACATTGTACTATGT
ATGATGAAAATCCAAGTTTTGCATATTTCGCCTAGTGCACACTGCCCACAACCTTTTCTC
TTGCACACGTAGGTGGCTATGAAAGAGGATCGTCTGTGCGCCTCATAAATATCGTTATTC
AGCATATCAAGTTTTTGCAGCAATGTTTCATACGACGCTCAAACATCCTACCTAGATATT
GTTTTTTTGAATTTATAGGCCAAAATAGAATAGAATGACAATTTGCTTTGTACTCACCAA
GTCCGCGCTTGTGATTACTTTGTAATCATATATTTATTTATTTATTATTCTTGTTCTATT
GTTTATTTACTAGTGACCTCATCTTCCTTTCCTGAACATCGCAATGTTTCCTCATCTCTT
CTTCCCTTTCCCATGTCCTCGTTCCTAAAGTTAAAATCTTTGTTTATCGACCTATTATTA
ATAATCGGTAAACAAGTTTAACGCTTGTTCTTACACCTTTTTATGTGTATTTACAGCCGC
CAAACGTGGCTTATTCAAAGCCCCACTTGAGAACCAATGCGAGCGCATCTGGAAAAAGGG
CTATCGGTAACAAACAGTCTCATCTTACGTCAGCCTAAATCCGCCGAAGCAGCGATCGGC
CTCGTGGTTGTTACCTAGCTGCCATGGCGATATTTGTTTACATTCGTGCTCGCAGTCATA
TAAATAAAAGATCCTCGCTACACTACTGAACCTCTACACATCTAACATTTTGCATATTTT
TCTAATATCCTCCCTTTAGTAGGCTATATCTAAAGGGTTTGATACCCGTTCTTCATAACT
TTTCTTTTTCTATCTTTTTTGTTTCGTTTTTTTGGTTTCTTTTGCGTGCCAAATTTTTGG
TCTTTTTGATTTTGCATTTCATTTCTATTTTTCTTGGTTTCCCCATTTTTTGGTTTTGTA
TGAGTGTGCTCAATCAACTTGTCAAATAATTTCCTCATCGCATACCATATTGATTAACTT
TTCCTTTTCTTTTTTTAATCGTTTTTTTTTTTGCATTTACATTCCCACTTGCCAAACCGA
GAATATATCGCCCGGCGTTTGATTTTGTTTCCCATATTTTCCTCTTCGACACGAGCCTTT
CCTTGTTGCCTTCTTTTGTTTTTTGTTTTTTTTGTTTGTTGAGCCGTCATTTCTACAAAA
CATTCCCTTTTGCATTTTTCATCGCATATATAGCCTAAAAGTTATCTCTCAAAGTGCCAT
CTATTTTTTGGTTTCTTTTTTTTTTCAGATTATTCTTTTTTAATTTGAATTCTCCCTTTC
TCTCTCTCTATTTCAATCACTTCCAGAAAAATTAGCAGAAGTATGGGGTTTTCTAAAATA
GCACTTTTTTCTTTATTCGCGCTCTTCGGCCTTCCTACCTCTCTTGCTAAAAGCAGTGAG
GAATGGCGCGACCGTATCATTTACCAGGTCATAACTGACAGATTTGCCGTTGACTCTGAT
AATACACCCGATTGCTCCTTCGATGATAGTTCTTATTGCGGTGGTACATGGAGCGGTATT
CGTTCTAAACTCGACTACATCCAAGGAATGGGATTCAACGCCATCTGGATCTCTCCTGTC
GAAAAGAATCTTGAGGGTTCTTACGGTAGTGATGGTGAAGCTTACCATGGTTATTGGAAT
ACCGATTTCACTCAATTAAACGAGCATTTTGGTTCGGAGGATGATCTCATCGATTTAATC
ACTGATATGCACAATCGTGACATGTGGATCATGTTTGACGCGTTGGCCAACTCAATGGCC
ATTCCAGGACCCACCGATAACATCAGCTACTCGAATCTTGTGCCTTTTAATGACTCATCC
TACTTCCATCCTTACTGTTGGATTGACTATGGCAGTAACAATAATACAGATATTGAGGAT
TGTTGGACTGGTGATGACAATGTCATCCTTGCCGATTTAGACATTGAGTCCACGAATGTT
GCTGATTATTTGCATGAACATATTCACGATATGGTCGAGCGTTATCAGATTGATGGAATT
CGTATCGATGCAGTTAAACAAATGAATCCCGAATTTTTCCCCAACTACACTTCTGCTGCT
GGTGTTTTTGCTATTGGCGAAATGTTTAGTTACGATCCCAATGTCTCTTGTTCAGTGCGT
AATTATCTCGACAGCATTACCAGCTATCCCATTCGTCAAGGAATTGAATTTGCATTTAAT
TATACTGGTGCTGCATTTGAATATCTTCAGGAGATTGATACGCAATTCCAGCAAGCTTGT
GAGGGACAAGATATGTCGGTTATCGGAAACTTTTTGGAGAACCATGACCTTCCCCGTTAC
ACCTCTATTACCAATGATACCTCACAAGATATTGGCGCCATTGTTTTCCTCCTTCTGCAT
ACTGGCATTCCCATTATTTATTATGGAGAAGAACAACGCTTGCCTGGTGGCTCTGATACC
CCGGAAAACCGTGCCGCCTTGTGGAATTACGGCTATGACACTGATGCAAATTATTACCAA
ACCATTCGCACTGCTATTGCTCTACGAAAACAAGCTATAAGTGACAGTGATTCTTGGACC
ACAGATTCTCACTCTTATTTGGACTACGATCTGCGCCATGCTGTGGTAAGAAAAGGTGAT
GTTTTGGGAGTTTACACAAACTACGAGTCAAGTTCTGACAACGTTACTTATGATGTCTCC
TCTAATTTTGATGATGGTACTGTTTTGCGCGAGGTTTTGAGCAATACTACTACGACCGTT
GGCTCAAGTGGAGCATTGCACGTTACTGTTGTAAGCGGTCTACCTCAGGTCTATTATCCT
GAGGCTAGTTTGACTTCCTTTGGAAACTTCCTAGGAACGGCCACAAGTTATTCTTCTGCC
TCGGCGAGCTATCCTTCTACTTCGATGAGTGCTTCGCTTTCATCTGTGCATACATCATCT
GCCACATCAAGCTCCAAGTCTAGCTCTAGCTCTAGCTCCAGGTCCGGCTCTAGTTCAAGT
TCAAGCTCCAGGTCCGGTTCGACTTCTTCTAGCGGCTCTAGCCATACCATCACTTCTACT
TCTCAAAGTGTGCACACGAGTGGATCGTCGACATCTACTAGTAGTGTAGCGGTCACTTCC
ACGGCATACAGTAGTAGTTCTAGCTCGTCTTCCTCAAGCAGTATTGAAAGTTCTGCTAAT
GCTGTTCGTGTATCTATCCTTGGCGTTGCAGCATTCATTGCTATCGTTCTATTCATTTAG
TTAAAAAAATAATTTTATGGAAATCTATCTTTTGCATCTTTAATAATCTCAACGCATGCT
TAAACTTTCGTATTCGCTACAGTGTTACAGTGTCTGTTTAAGCTTGTTGTTTTTGCTAAC
TATAAATCGTTTCATCACAATAAAACATCATTTTTGCACACATTCAATAAAACTAGTGTG
TAGGTGCGTTTACGCGTAATAGTCTGTAACCGAAGGGCATAATGTATCGGGTATGTTAGT
TGTAAACATATTTCGCTTTTATGTAAGGATACTGAGATTCTATCATATGCGTTCAAAAAA
AATAGTGATATTACGATTGCTTGTTGTAGCTTGCAGCTAACGCAACCTGTGTCAAAAAAT
TGACTGTACGACAAAAAATATATACCTAGCTTTAGGTGCACAAATCCTCTACTTCATTTC
AAATACACATATTGGTAAAGAAAGTGTTAGTATTAGTTGAGTTATCTGTTGGAAATATGA
CATTTAGAGGGAAACTATCAAAAGACCCAAATGGAGCATTCGTTTATTAAAAGCTTAATT
TTAGGCGAAAGAAATTAGCTATAACGTTTGTATAAGGAAAAAAGTATTGTGTATCAAATC
GCTAGATCGAACATGCATTGTAATAACAGCATATTTAACAGTGAAATTGACCATAAATCT
CAAAAGAAGGATTATATAAATTGATCTTTAGTCTTTAAGAGCAAAAGCAGTTAAACGGTT
TTGTAGAACAGGTAGTGAAACGTCAATAAAAGGATCGAATTTTAGATATTCAATAATTAG
ATATTTAAATTAGGCAATTCTCTGTTTAGTATTTGACGGTTAACTTTACAGTACATTCTA
GTGAAAACCTAAAGGCCACCAGATAACCAACTAAGTAAATGTGAATGATACTTATAAATT
TTTTTTTATTCGCTTTTAGCACCTTTTGAATTTAAAACGATCCACGTATCTCGATAGCTG
TGTACTAAAATATCAAAGCAAAAGTAAACATCTTTCAGTATGATCACTCTCAAATAATTA
CAGATTATTCGGTAAAAAAAAAAATTAAAAAAATAATAATATATATATATTTAAAAAAAT
TCAATTTGTTTTCAAGCTTGTACTTTACATAGCAAATACTAAAATTTCCTACAAGTGCCG
ATATCACATCTTAAATTTGTTGAATGCTATATTTATGTAGTACACTCTTCAAATTTGTAA
AAAATAAATTATAACAATAGCATCGATATCAATAATAAATCGAAAATAATAGTAATTAGT
TGAAACCTCGATTAAAAATACGATATAGTTTGTACACTTGTAAAGTACATTAAAAATTTT
TGAATTAAAAACATTCACCTGTTTTTCAAAAATAAAGTCTCTTGAAGGAATTTATAAACG
GACTCACAAACACAGAATCAACTACTGTAAAGTTAATTTGTAGATGAATAAATAAATGAA
AACTGCGTATCTCAAATTTCAATTTTCGCCAAAAATCGCATGTAATCATGCAAAACAAAC
GAATTTTTTAAGCGGGACGAAACGATTAAGCTATAAAAAAAGTGGCATCTTTTGTAATAA
CGTGGACTATGCATAGGGTCAATTTATCAACAAGAAAAAAATTTTTTTTCTGTCAAACTC
AAACCCAAACAGGGTAAATAACCAAGTTTTCTTAAAAATCCTTAACTCCATAATCTCTAT
CGTAGCCCTCAGAAACCAGTATTTACACACCCTCCTGCACAATAGCGTAAGATAGTAATA
AGAAAGTATGGCAAGTCATCTTAACGAGATGCGATATTATTAGATAAAACACTCAATCTA
GCAAGCGAAATATCGGATCTCAACTGGTATGGTAATTTATCAAGGAATTTGGGCATATTG
CTTAAGTAAATTTAGACGACTGTACGTAACAAACCGGGGAATGTACGCGAAGTAGAAAAG
ATACGAAAAATGTCTGATCACAAGATTTTTTTGTTCATCAGTAGTCCGGACATTTCGATT
TGCAATGTTAAGCGATATCCGTTTGTGAAACCATGCGAAAATCCATTCCAAAAATCTATG
CGACGAACACTTTGTGAGTCATATTGACTGTTGAAAGTAGTGTACTGCTGCACACAATGT
TCGTTGTCATTCTATGCTAGTTATTGAGATATGTTGGTCAACTTTGGCATAAAAAAATTT
TCAGTTCAGACTAAAGGAGATATCTTAACTCCCTATTATAGGCCATAGCACTCAGGACAA
GCGATTATATTTTTTTATCAGTTATAAGTTAAGCGACATTGATAAGTATCTAACAGTAAG
GTTAGTAGAGTAAGGGAATTTTATGTCAGAAAAAAAGCACTTGATTGCTCATAGATATCT
AAAGAGGCAACAGATATTTAAAAAAGAAAATTTTCGGTCAATTACTTGGTATAAATGAAG
CTCAATTCCTTTCATTTTGAAACCAGATTAGGATTTGGTGTTTTCATTGCTAATTTTATT
TTATTTTTTTATTTCCTTTTCATTTTACCTCGAAATTAGGAAAATAAGTTGTGCTTTGTG
AGCAAAAGCAAGACCAATTAATCAATCGTTTGGAAAGAATCGCTCTATAATAAAGGGATT
TGATTATTTATTGTTATCGGTTTCTTAAATACTTCCTCATTTTCATTATCTTTTTCTACC
TTGATTCATCGATTCCCTCTCTACTTTATACATTGTTTTAATTATGTCTTCCATCACTTC
AAGGGTGTCGTCGCGCTCCTCTCATGAGCTGACGGAAAAGAAGTCTGGTGTTACCAATGA
TTTCAAAAATTCTTTCGAAGTCGGCGAAGTCAAGCGCTTGCCCGATGCAGAAGGAACCGC
AGATGCGGTGGCTCAGGAACTGCTTGCTGATGATGATTTTACTTATACTGCAAAGGAAGC
GAGGCGTGTGTTGTGGAAGATCGACTTGGTCATGATGCCGGTTATGTGCATCACATACAT
GATTCAATATTTGGACAAAACAGCCTTGTCTTATGCCGCTCTTTATGGTATGAAGACGGA
CACACACATTGACGGTCATACGTACAGTAGTATGACTACTCTCTTTTATGCCGGCTATCT
CGTCGCTCAATACCCCGCTGCTATTTTAATGCAAAAATGCCGTCTTTCTTATTTCATCTT
CTGTAATGTCTTTCTCTGGAGCGCTATGGTCTGCCTTATGGCGGCTTGTCGAAATGGTCC
ATCTCTGCTAGGCCTTCGTTTCTTAGCTGGTATCTTTGAGGCTTCTATTACCCCTGCATT
CATTAACATCACAGCAATGTGGTATCGTCGTGAAGAACAACCCATGCGTACTCTATGTTG
GTATGCGTTTAATGGAATAGCCCAAATCATTGGATCCATTCTTTCTTACGGTCTCGGTCA
CATTCATGGAAAGGTTGCTTCATGGAGATACGTTTTCATCGTTATTGGTTTAATGTCCTT
AGGATGGGGTGTTGTTTTTGTTTTTATTCCTAGTAATCCCAGTAAAGCCCGTTTTCTGTC
TTCTCGTGAGAAGCGTATTGCACTTGAGCGCGTCCGTGACAACCGTACCGGTTTGGAAAA
CAAGCAGTTCAAGTGGAAGCATGCTTATGAGGCATTTTTGGATCCCCAAGTCATCATGAT
CACCTTGTTTACTGGTGTTTGTATGATCACCAATGGTATCGGTGTATTCAGCACTTTGAT
TATTAAAGGTTTGGGATATAATGAGCTTCATTCGGCAGTTTTGAATATGCCACTTGGTGC
TATTGAAGTGGCTGCTATGTTCATTTCTGGTGTCTTGTGCAAGGTCTTTAAAAATGGTCG
TCTTTTAATCGGTGTTTTTATGAATTGTCTCACCCTAGCTGGTTGCCTAATGATATGGAA
GATTCCCGATTCCAATCCTTATGGTCGTCTGGTAGGTGTTTGGTTTACCATGTGGGTGCC
TGCATCTAGTGCTCTGCTTTTGTCATTGATTTCTTCCAACGTCGCTGGTTACACAAAAAA
AACTGTTACAAGTGCAACTGTTTTCGTTTTTTATTCAGTTGGTAACATTGTGTCGCCTCA
GTTATTTAAATCGGGTCAAACTCCTGAGTATATCGAAGGTATTCAAGCAATGATTGTTTC
CTTGTGCATAATTATTGCTATTGCTTTTGTTCTGACTGGTTACTATATTTACGAAAATAA
ACGCCGTGACAGACTTTTAGCTGAGGATCCTTCTTTGGGAGAGTCAATTAAGAATGAAGA
GTTTATGGATCTCACAGATCGTCAACAACCCAAATTTCGTTATAGATGGTAATACAGTTT
CTCTCGCAACAAAGAGGAAGTATTGTTGTCATTTTAATATCTCGTTAATGAATGATCCTT
ACTCTGCCTATTGCGGTCACACGTTCCCCTTCTCATGTCATGTTTGATTATCTCTTATAT
TTCTTTATTGTTTCAACGTTTGTTCTTAATTTAAGATGTGTATATTATAAGTTAAATAAA
GTGAAAATGATATTTTTAATACTATTCAATTTAGTATAAATACATTTTGGTGTTGTAAAC
AAATTACAGTCTATGTCTATGTACTATTTTCATTATTGCTTCGTCTGGTACAGTACTTAA
CGTCTTATTTGATGAAACAAGGGGTTGAATGCAAGTGGTACATCTGTTCACTACTCTTTC
TAATAATGTATCAGGTGATATAGTCGTAAAATGAATCTAATCCCAAACTTCATTCAAGGG
CCTAAATCCATATACAACGGCTGAAGCCATCCAGAACGCTTTTTGCAAATACATCTATTG
AAGTCCTAGTTGAGACGGATTTTGGAACGCAGACTAAGTAAACTCAACATTATGTCGAAC
GACAAAGATGATCCTATCCGTTGTATACTTTTTAGTTCCTTAGCACCATATTCTCAATTA
AAAATCCCTACAAAACCTGTGATCTAAATACAACAGCTATTATTAATTAAATCGTGCTGT
ATATAGCAACAAACATCTTGAAGCAAGATATTTTTTTTTCCCCAAACGTTGAGTGACCAC
GATGATGATATCTATTAAATCTAAAAAATTTTCTGTCACCGTATAATACGGAGAAAAACT
TTATAAATGTAAATTTATTACAAAATTTTACAAAAAGAGAAAATTGAATATTCTAAAAAA
GATAGGATTACTGGCGAAATTTAGTAACATCAAGAGCATTGAAGTTGAATCGAGTATTTC
GAGGAAAAGCAAAAATATCTGTAAAAATGAGCACTACGACCGAAACAGTGACATGGAGTC
AGTATAAACCTCAGGAAACTCAAAGACGACTTTCACGTTCAAGCACTATCACTCCTAGTG
TATCAGAATATCGATCTGGTTTCTCAAAAACTGCTTTTGGAAATATTGAACTGGAGGAAA
TTCCTGATAAACAAGGCAACATTACACGTGCTACAAGCAATCTCGAAAGCAATTCATATC
CGAAAGCATTAGATCCTGATGCTTGTCCTCCTAAACGATCAATTGCACTTGTATTACTCA
ACAATCTCATGTCTGAAATGTCTTTGACTATTGCGTTGCCAATTTCGGCTGCATACACTG
AAATTTTGGGAGGTACTGATGCTTTCTCAGGTCTTGTTATTGGTATTCCTACTATGATTT
CACTAGTTTGCTTATATCCAATGCTTCGGTTTGCGAATCCAAAGTCTGCCAATGGATATA
CGCTCTACTTTCGACCACTGATTGTTTCCTGCATTTCTCAAATAATAGGCCATTTACTGT
ATTCACTAGCGTACCGTGCACAATGGCTGTATTTAATTCTTATCGGTCGTATGTGCAGTG
GTGTTGGTTTTACCATGTTTCTGTATCATAAAACTTACTTGACAGATAAAAACTTTGTTG
GACAAAATCGATCCACATTTTTGGCTACTCTAAACATTTTGGCCCAGATTTTAGGGTCCA
TGGCAGGTGCCTTTCTGGGTGGTATATTAGCGAAGGCTTCTATGCACTTGACAGACCCAA
TTTGGAATCAATATACTGCAGGATCTTGGTTTATGCTATTTATCTGGATCGTATATTCAA
TCTTTTTGTCTATCTTTTTTAAAGAAGTTCGGGTTGGCAACACTGCAACCAATGTTCGAA
AACCCGAATCCTTCACCGGAAAAACGGCTCCACTGTCCTTCAAGCAAAAGTTTATGTTGT
GTTTTCTGTCTATGGCTGCTTTCATTTCTATCTTTAATGTTGCCGGTTATCAAACCAGTG
TACCTATTTACGCTAAAGCACTATATCATTACAATCCTTTTCAATCTGGTAACTTCCTTT
CTCTTTCATCTTTGGTTATTGCTCCTTTTGTATTTTTTAGCACATTTCTATCCAAGTGGT
TAGAAGATAGGCAGATCATGCTCTACGGATTCATGATGGGTATAGTGGCCTTAATAGTTC
ATTTAGTATTGGATGCTGTTCACAAAATCCCCGTACAGCCCTATTTTGTTTTATATTCCA
TAATGCAATTTGGATTTAGCGTTGGTTCGGCTCCGTTGGTGTCTCTTGCTACCAAGCAGT
TGCATCCAAAATACCATATGATTACTGGTGTCGTAGTACAAGTTGGTATTTCGATTGGAG
AAACAGTTGGCTCTATTTGTGGAGGTGCCATTTTTGATATAACTACTGTTGGCTTTATTG
CTATGAATTTGGGTATTGCCTTACTGGTTTTTATTCAGCTCCTCTACTTATGGACCTTTA
TTAAAACCAAGACTGGTTAAAAGAGTTTTAACGAAAATTTGGGAAATAAAAAAATTCTTA
ATTTTCATCCGTTCTTTTGTGGATCGTATTATGTATGAAAGAATCTTTATTATAGTTATG
CAAACCCCTTATGAAAGGTTTGAAAATTAGAAATTACCATAACTCTTTAATGTATTGTCG
TTACGATTTTTAAAATCACCAAAATTTTACTAATTTATTCGCTCTCATGTCGTATTAACG
AGAGTGAAAGCCCAACGAACAATGAGGATATATGTATACATATATAATTTCTGTATTTCA
GCTTGGTATTACCATCTAAAACAAAACTTGCCGCTAGCTAGTTTAATATATTGAAACGGT
ACATTAGAATACTGGGTAAATTTAGATTGTAAACCATTGCTCTAAAACAAAATATAAAGA
ATGTTTTTTTGCAGTAGAAAAGTTAATGTTAAGTGATATTTAAATCGTATGACTCTAACC
CTTGTTTCTTAAAGTCGTTATTACTTGAATAAAAGTGGTCTGCGAAATTGGAGAATTACC
ACAAATCAATTTGTAAAGGCTTTTATTTTAATAGAGAAATAGAATCCATTTGACATAGTG
AAACGGTAATTTTTTGCTTGTTAACTTTCTTGCATTTACCGAGTCTTTAATATGTGTATG
TTCTATACTTCAACTTCATGGCCTATGTTTGCTGAAGGAACCAATACATGGCATATAGGA
AATAAAAGTATCTGAGGTGAAGCACTAAAAATATTTGGTTGTATTTACTGTAATCAGGTC
GCAAATTTTGCTTTAATCAAGCAATCGTTTCGTTGGAAGAGGAAATTTTTTGGACAAAAA
TGAGCATCAGTATTGAAACAATTACGAAACGAAATCAATATAGAGTTGATCAGCCTCAAA
GGCAGCCTTCTCGCTTGAGTACTGTAGCTAGTATTTCAGAATACCAATCCGATTACTCAA
AGACTGTCTTTGAAGAAATTGAACTAGAGGTGATACCTAACAAACAGAATATCTCTACAC
GGAGTTTTAGAAATGATGGAAATGACTCAGATCCGCAAACATTGGACCCCGACGCGTACC
CACCCAAGAGATCTATTGCATTTGTCCTGCTTAACAGTATTCTCTCAGATATGTCCATGT
CAACTGCGTTACCAATTTCGGCTGCATACACTGAAATTTTGGGAGGTACTGATGCTTTTT
CAGGTCTTGTTATTGGTATTCCTACTATGATTTCACTAGTTTGCTTATATCCAATGCTTC
GGTTTGCGAATCCAAAGTCTGCCAATGGATATACGCTCTACTTTCGACCACTGATTGTTT
CCTGCATTTCTCAAATAATAGGCCATTTACTGTATTCACTAGCGTACCGTGCACAATGGC
TGTATTTAATTCTTATCGGTCGTATGTGTAATGGTGTTGGTTTTACCATGTTTCTGTACC
ATAAAAAGTATTTGACAGATAAGCACTTCGTGGGGCAAAATCGTTCTACTTTCCTTGCGA
CGCTTAATATTCTCGCGCAAACAGTAGGTTTCATGGCCGGTTCATTTTTAGGTGGTTTGC
TGGCCAAGGCATGCATGCACTTGACAAACCCAATTTGGAACCAGTATACTGTTGGGTCTT
GGTTTATGCTTTTCGCTTGGTGCATATACGGTATCCTATTGTCTATCTTTTTTAAAGAAA
TTCGAGCCGATGGCAATGACTCGTCAGCTCGAAAGCCCGAAAACTTCAATGGACAAGCGG
TTAAGCTTAGCTATACGCATAAATTTATGCTAGTCTTCCTTAGTATGGTTGCATTTATCT
CATACTTCAACATAGCAGGGTATCAAGCTAGCGTTCCCATTTATGCTAAAGAGCTTTATC
ATTACAATGCCTTTCAATCTGGTAACTTTCTTTCACTTTCTGCTCTTGTAATAGCTCCAC
TTGTGTTTTTGAGCACGTTTTTGTCTAAATGGGCAGAAGATAGAGATATGATGCTTTATG
GCTTTATATTGGGAATACTGGCTCTTGTTGTACATCTTGTTTTAGACGTTCTTCACAAGG
TTCGCGTGCAGCCATACTTTGTTTTGTACTCTGCCATGCAGTTTGGGTTTAGTATCGGTT
CCGCACCATTAATTTCACTTGCTACTAAACAATTGCATCCGAAATATCATATCCTTGTCG
GCATTATTGTTCAAATTGGTATATCTGCTGCAGATACAGTTGGTGCTATCTGTGGAGGCG
CTATATTTGATATAACCACAGTTGGATTTATCGCATTAAATTTGGGTATTGCTGTACTGG
TGTTTATTCAATTGTTGTTCTTGTGGAATAGCATCAAGACTAAGACTGGCTAAGTACTTT
TGGCTGAAATGTTGAGAATAAAAAATTTCACAAACATTTGTTTGTGAACAAACCTTAGTT
GAAGCAAGGAACATACCTCGCTCAAAGCTGGGAAACTGAGATGATAAAGGAAAATATTGT
TATGAGGCTTGTAAAGTTCATTATCTTAGATGACTCTATGATTTTGTATCTCAATTAAGA
AAACTTGTTAAAAATCATTTAGATTTGTGAGACCTTAAATCAGATATATTTGTTCTACGA
GGATTTGGAATGAAATTTCCGGCTTTGATATACAAGACTATAGAAAATCGTTCATTCTAT
ATTTTAAATATTTAGTTTTTTTGGGTTATCTGGAATTAGTTATTTGAAAGAACCGAATTG
ATGAGATTAATTAAGTTCCTATCATTTTTCAAAAGCTGCTTATGTGAATGAACTTTAAAA
AACGAGAAATTGAAGTTTTACTAAATCGGTTAATTCCACAATTACAAACAGATAAAAAAG
TTCAATTATACAGTTAGAAACTTTAGCTTCTTAATAGAAATCTAAGAAATGTATACCTTT
CATGAGTAAAAATTGGTTGAAGAAGTAGCTCCATTTGTAAAAGCGTAAAATTAGTAGGAC
TTTTGTTTAAAAAATTTAATACAATGTAAACTTATTGATAGATAATCAGCAATTAGATTA
TTTTGGTTTCCTTAGCCTTCGCTTTATGATTAATATTTGCCTACAACAACTTGATTAATT
AGAAATTACTGATATTTCCAATTCTTTATCACTCTCGCTAATGATAGCTTGTGACGATTT
AGTTTTTCTAAAACGGTAATGAAGTTAAAGCATAAAAAAAGTAACAACAATATTCACAGC
CTTCACATTTGCTTTAGAAGGTAATTAATAAAGTTAAAATTTAATTTTTCCTACAAAGAG
CTGGACTACTTCTTGAACGCAACATTATGGCTGGGCTGTCTATTTCGGCTCGAAGAACTT
GACCGCAGCGCACATCAACTACACCTTGAGGCAATTCAAAATATGAAGTTTTCTACCGTA
GGGTTTTTGTTTTCAACAATTTTATTCAAAAGTGCGTTTGCAGGATGGATGGATACACAC
ATGAAAGATGAACATCACATTGATAAGTACACAGATGAATCTTTTTTTCGTCTTCACGAT
TTAGGAAAAAAGGGATACTGGTCAGATCAAGATATACTTAGTTTATATGGATTATTTGAA
AATGATGAGGTCCCATTCGTCAAAAAGAATGAGGTTTTGGTTGATGTTCTAAAAAAATGC
GATCCATCGGGCAATCGCCGGATAACACTTGATGAATTTCTTGCATTTCGTAAAAATGGA
GGAGAGTTAACGGATTTTGGATTTCCAGGGCACCATGGTGATGAGGAAGAGGAATTTGAA
ATGCATCATGTGGAAAAATATCACCCAGCTGGCCTCGATGAACCAGATGAAAACTGGAAT
CATCCTGAAGATATCGAACATTTTCAAAAACACGATGAGATATTTCATGGTGATAAGAAA
CCTGAGGAACGACGCAAACATTTTGTAAAATACAATAATATCCCTGACAAGTATCGTCGT
GTGAGCATTTAAATTTTCCCATTGATAGATTTACTTGCTTCTCCTTGGGACGTTTTATTT
TTATTTTTATTTTTCCGTTTATTTTTGGATTGTCGTGTTCCGATATATATCCGTGTTTAC
AAACAATAGCTTCAACATTTTTGAACGGGTCCTTCCAATACTAATGCCATATCTTATTTC
TTTGTCAATACAAAATCACTTTTGTTCGTTAAACTCATTTTGGTTTGCAGATATTATCAT
ATTCTTACCAATTATACATACACTCACAATTTGTTTTACATTTCCGCTCCCTTCTTCAAT
AAGCTGATTGCTTATAAAAAATCAAACATTCATATGATTCAAGTTCAAATATTATCATCT
GAAAACTGACAAGTTCCATTCATTACTATATTAATATCATTTATTCGTTAAACCGATATC
ATTAAAAATGGAAAATTAAAGAAATCAATTCATTTGCTTCCTTGAAGTCTAGAGTCGATC
ATAACGAGAGCTTCATGTTGAAGCTCTTTAAGTGCAGCTTGCTTAGTAATATAAGTGCGT
AATGTTTCAACAGCCTTTGGTGTTTTTATGAACTTGTTAAATATTTCTTGATCTTTGGAA
TATACGATATTGCATATGCAAACTAATCCACGATGTTGAATTCCTTCATCTTGGTCGGTT
AACATTCTGACTATGTAGTTAAAATCGTTCTGGAGACTTAAAATTTTCTTGCACCCTTCA
TCAACACTAGTAATTTGAACAAGAATTCCGCATGCTGCTAATCTCGTGGGAGTGTCTTCG
GTATCTGAGAGTGCTAGTACAATGTGTAAACGAGTATTTTCAAAATCCGAGTCCTTGTCT
CCTATAAACTTAATTAAGCAATAAGGTGATAAAGAAAGGTTGTTAATAAGTTCCGTGGTT
GCCCTCTGAATTAAAGGATTTGTTTCTATAATTAGTTCATCCAATTCTCTCCAACATTCT
TGAACTATGGCTTGCCGACTTTCTTCATCATGTGAAGCAAGATTTGTTAGCGCAAGTAAC
ACTTCAAATTTCCCCAAGAGAATTGGATACTCAGTATCAGCAGAATTAGTACTTAGTAAC
TTTGACATAGGATGAATTGCTCGGTTCGATGGAAACGCCTTAGTAAATATACTATGAGGA
GCCACACTGATAAGAATTTTCGCTAATGCAAAAGCCGCATTCGAATCCTGGGTTTGGATA
AAACATTGTCTAGTAAGGAATTTCAATGCACCTATTTGTACTAGCTTGCGACGTGCCAGC
TTGTAATTAGCCATGTGTACAAGTATCATTGCTAATAACCCGTTTAGGCTATTATAGTGC
TTGGCCGCTGAAAAGAGTTTTGACAGAATGTCATATTCTAAAATTTTTTGAATCCTCCGT
TCAGTAGGAGCGGTTTCATCTTCTTTGTAATCAATAGTTTTTGAAGCTTCAGCCATGTTA
CGAAGTTGGTTCAATTCTCTTTCATGCTCCGATTTTGTGATTTTGAACTTGCACATATTG
TATATTATTGTAGCAATAGAACTTGCATCCAACGGTGAAATGTTCGTATCTAAAAGCAGT
TTTGATAAATTATTTAAAAGACAGGAATCATCGGCAATTAGTTGCTTTACGGGTCCGAGA
GTAGAGGATTGTCGTAACGCTTCTAATAAAACTGAATCATATACTTTACTCTGCAATAGA
AGCTTTAATGTAGGAATAACTTGAGAAAGCTGGTACTGAAATGCTAACTTCATTGAAATG
AGTATAGCAACTCTTGAAGTGTGATTATCTTTGATAAATTCGCTACATTCTTTGTGAATG
ATAGCACGGCATTCCTTAAAGTTGCAGGCAGTATTTAAGATATTTAGCCATTCCTCTTGA
AGTCCATTACGTTCAGCTAATTCGGTCCACTCATGACAGAACTCGGGACTTATAAAATCA
GGGTGACTAGGTAAACACATCAATAAAAGAGAGGACATCCTTTCAAAAGAGACTGGAATA
GTTTCCGGTTGGCGAGCTAGAAGAACGCAGTCCTTGGCAAGCACGAAGGCAAGGTTGGAT
GGACCATCTTGGAAGATAATCGCACTAAGAAGCCTGTAATTAGGATTATTTAAAAAGGCG
CGTCGAGCATCAGTAGCAGAGGTGAGAGATTGAAGAAGATAATTTCGGTTATTAGCTTCT
TGACAAAGACGAGCAATCTCATTTGCCGTTATTGAAGAAGGAGAAGAGAATAGTTCATAC
AGTAGATATTTTTGAGTTTTCTGGGGTATAATCTTTTCATTGACTATAAGCAGCTCAATG
CCAACAGTTGAAAGAAAGAAAAGTTTTAATGGAAAGTCCGTCGGACATATTGAAGGCTGG
GATACAAACCGTAAAAACGCGTCTCTTAGCTGCTTACACCAGTCATTCAGAGGTGGAAGT
AGTACAAGTGAGAAAATACGCTTTGCAATAGTTTGCAAGTTTGCGGGTAAAATAGTATCT
ACACACAAAACGCATTCGTGCAAGTCTTGTAAATTACATAAGTAGTTCCATTCTGAAGCA
GCAGTGGACTTTGGACTTAAAAGCACAATCGCAGTGCTGATTTTAGATTTAAGAATTAGA
GTAACGATTTGCTTCTTTTGGTAATCAGAAAATACGTTTGACTCCACTGAATTTTTCAGA
ATATCATTTAAAAGGTCAATTTGAGGTGTTGAGGAAAGCTCGTGGGTCATTTCACTTTTG
TCTATGCACCAGAATAGAAAAGGTTTATGATAATGGAAGAAACAATTAACGGGGGCATAC
AAGTAATTGGTAAAATATTAAACGCCGGTACGTCCTTAGAACTAAGATGGTAGGAACAGG
ATAAATGCAGCAGCTAAGACGTAACCCGACTCTATGTCAAATTTGGGTAGTAACTACTGT
TTAACACTTACAATAATACATATTAGCCTAGGACACTACAAATGAGATTTTTAATTAATT
AAGCAAGGTAAAAATGGCAAGTTTTATTTAGCTACAAAAACATTTTAGGCCTTAAGAGCA
TACTTGCGAAGGGGGAAGTAGCGCTCCTTCTTAATTTGCTTAAGAGTCTTGCGGCTTTGC
TCATAGGGAGTAAGAGCGCGACGGATAGCACGAGTCTTCTTTTGACGGAGATCAAGAGGA
ATGTACTTCTTGTTCTTGTAAGCCTCACGAGCGGCAAGACGGTTGGACTCGTTGATAACA
GTCAAGATACGAGCAATGTCCTTGCGGGTAGTCTTACTATAAATAAGTTAGCAAACATTG
AACAAGGAACATCATAATGTTTAGAAGATCAATAGAAACTAATAAAAACCGATGCAAAGA
ATTGGTTGGCGACATCTAAAAAGGTGCTACAAGCTGTTTTTGACCTGGAAAAAACTTTTC
ACTTTTTCCATCGGTCCAGAAAGACGGAAAAAATATGCCAACGCAGGTTATTTCATGTCC
ACTGTTCTTAGATGCCTTCTAAATACATTTCCAGTACTGCTTCTCACAAAGCAATACCTA
TTTCCTAAGAATTTACTTACATCTTAGACAATTTAGAACCAGAACCACCGGCAATCTTTT
GTACGCGAAGAGAGGCAAGCTCTTGACGGAGCTCTTGTAATTGCTCAGCCAAGTTCTCTT
GCGATTGCTTACGAAGTTCAAAGGTCTTTAATGCCATCTCGTCGTCGTCGTTGGTCAAGA
GTAAACTCAGCGACACTGTTGCTTCCTACTAAAGTTTCCACCAAAGAAAAGCAGTCACAC
TAGTGCAAGTCAACACGCTGCGTAAAACGTCTCGTTTCAAGCTCGAAACTTTCGTGACTG
TTTTTTATGAATAGACAACTGAAGCCAGACAAACAACCTGCCGAACGCCGTACGTTAGAA
AAAATCAAACAACAGCAACATGGGCCGCGATATTTACAAGGACGAGACATTGACGATCCC
TGAGGGCGTTTCAGTTGACATCAAGGCTCGTTTGGTGACTGTAAAAGGCCCTCGTGGTGT
TTTGAAGCAAAACTTGCGCCGTGTGGATATTGAGTTGAAGAAGCAAGGCAACACTATCAA
GTTTATTGTCTGGCATGGCTCTCGTAAGCATAATGCTTGCATTCGTACCGCCTATTCCAT
CATCAATAACATGATCATTGGCGTTACCCAAGGTTTCCGCTACAAGATGCGTCTTGTCTA
TGCTCACTTTCCCATCAACATCAATTTGACTGAGAACGGAACCGTTGTTGAGATCCGTAA
CTTTTTGGGCGAACGTATTACTCGTGTCATCAAGTGTTTGCCTGGCGTTACCGTTTCCAT
TTCTTCTGCCGTCAAGGATGAGATTATAATTGAAGGTAACTCCTTGGAGAATGTTTCTCA
ATCCGCTGCCAACATCAAGCAAATTTGCAATGTCCGCAACAAGGATATCCGTAAGTTCTT
GGATGGTATCTATGTTTCTGAACGTGGTAACATCGAGGAGTTGGAATAGATGTATCACAT
GCAAAATGAATGAAAATGGTTTGTTGGCGATTTCAGACAAGCTAAAAGGTCCGAACGCTG
TGGTGAATTGTGTAATTATAGAGTAATGCTTGGATGGGTTTAGCACTAGCTTTTTTGCAA
TGACTTGTAAGTCTCATTGAGAAAGTACGTACTGCTTATAGTAAATACTTATTAAGATTA
TCCTGTTTCCTCCACTAGATATGTAGTTTAGCAAACACAGGATTGTATCAATGCAATACA
AGATACCAACTTCTTTTTTAGTTGCCATACTCTGAATAACAATTACTGCTACTCATGTAG
AGCTTGGTTGAGAAGATGTAAACAAATTGCAATATTCAGCCCAACGCTGCTTTGCATCCA
CTTGAAAACATTTTTCTTAAAATAGTTTTTAATCTGTAGCATCTTTATTTTACTTTTTGT
TTTTCTTTGATTAGCCCGGGCGGATGTTAGGAAAGGAATACCAAAAATTACAATAATGTA
TCGAGGATGTATGAGTCTGCAAGTTAAAGGTGAAACTACTAAGATAAAATTACAAAAAAC
ATTATGTATATAGCAGTTTTCTTTCCACGATTGATACGGTTTGTCTCATAATTAGCCGAA
TCTCTAAATGTTAGATGCAAATGTTCGTTTCGGATTCTGCAAAGTATTTTGTTGTATTAG
GAATACTGGAGTTAAGAATGGAATGTTAATGTTTATCAGATTGTTGGCTTGTGCACGAAT
ATGCATAAATCTGAAGCATAGCCAAAAATTGGAAAGAAAGCACAGAAAGACGTTAAGTTT
TAAAACGGAATTCCTGCTTCCTTTTCATAAATGTAGTCTTGATGTTCAAGTTTTCCATCA
TGTTTTATTGTGCCAACAACTTGAATATAAATTATAGGGTGAATTTGATATAGAACCCGA
AAAGGTAAACTTTTTCAGCTACGCACTTTAAGATCTCTGTGAAAATTAGTGTTAAATGCT
ACGTAGAAGAGCTATTAACATCAACATATAAATGCCGGTAAAATCAATCTCCTTTAAATT
ATTAAGTAGAATCCTTACGTTTTTTAATTTCAATAACAATCTGAATTTAGAAATTCCCGT
TACTGATTTGTTTTCTAGATGCAATTTTCTTCAGCACATGCTTTATAAAAATACAAGACG
CGATTCATCGTCATTGCGTTGAATAATATCTGGATAATTCTTGAATACAGTAAAATACAT
AAACTCGTGAAAAGGCATTTTTGTACAATCATTTAATGTTTACAACTCAGCTATTTTCCA
ATGAATTTCTTCTGCTGAGCATTTACTAATTTTCATCTAACACCTCCAATGTTCGTTTTT
AAACCATGAGTGAAAATCGACTTGGAATTTGTTCGACATGCCAAAAAAATGCTAGTAAAT
ATCGTTGTCCAAGATGCGATTCACGATTTTGTTGTTTGGAATGTAATTTAGAGCATAAAC
GGTTAACTAAATGCTCGGGAGAAAGAGACCCTGCAACGTTTGTTCCCAAAAGCAAACTTG
TTAATCATTTGAATTCGGATTTTAATTTTTTATCAGGTGTCGAAAGACTAATAAATCGAA
AAGAAAATGGAAGCCATCAAGTCTCAAATCGTGCAGAGCGAAATCGATTGCAATTAAAGC
GATCGCTTGAACGGGCAGGCATTAATATCAAGTTTGCTCCCCCTTCCAACAAAAAGAGAA
GATTAAATAGAACACATTATGATAAAAAAAGTCACCTCATCAAGTGGTCAATCGAATGGT
GCTTGCACGAATCAAGCACATCGAAGGATTTAACTGACGAAGCTTCTGAAAATACAATTA
TCACACATTCACATCCAGAAAGCGAACCGCTTGAGAAAATATTTAGAAAATTAGTTGAAG
AAAATTCCGAAATGAACTCACAGGTATCCAAAGCCAACATACACGCACCTGATGATATGC
AGTTTATGATAAAATCTAGAAAGTCGCGAAGCAAAGGTTTTATTTATAAAAAGATTGAAC
CTTCCAACTCACTTAGTTCTTGTCTACGGAACTCCTTTGTTTTCGAAGTGCCCACTATCC
ATGTTTTCACGTCTACTACTCAAGTTCATACTGAATCGAGTTATGAAACTTCAAGCTCGG
AGCAATCAGACGATTCTTCCTCTTCTTCCTCTTGTATATCGGATTCTGAAGAGTCTAGTT
CAGATGACGAATTGAATGAATTATCAAACGAAAAAAAAGCTAACAGCCCAACCCAAAACG
TGGATACATCATCGAAGCTTTCTTCAGTAAAATTTCAAAATGAAGACGACGAGGATAGAA
GAAAGAACTCCGATGGCTCTGAAGCTTCCTATTCTTTACCTCCTCTTTTCGGTTCTTACT
TCCAAAAGCAGGGACAATACTGAGTTATGGTTGTTTTGTTGTCGATCTAATAGCATTTTT
TAAAAAGGAAATATCGGGTATTTTTATTAATGTAAATCAAATATGGATTTGGGATATGGT
ATCTAGGTCATAGAGCGTCCATACTGGCAAAGGATTATCGACGGACGTTTAGGTTTCTAA
ATAATATTAATAGTAAATTCTAATTTAATTTAGATTACGTATGAATGCTTGTATATAGCC
AATTTTCTGTTCAAACGTAAAAACCAAATGTGTTAAAAAATTACTAAAGTACCAGAAGTT
CAGTTATAATTATAAAATGTGTCCTTTATTTAAAACCTATTTGCTGTACATATTAAAAAT
CTGTTCGATACCTTGTTTAGCATACGTTGTAAATTTCTTGGTGTGCTTCGTACTTTTTAC
CAACATTAAATTGGACGTCCGAAAGATGGCAAAAAGGCACGCAGAAGAGAATGAAGATAC
TGTTATGTCTGAAAGCCTGAAAGTAGTAGACACGGACTTTATTAATGTAGGTAAGTATTG
ATGAAACTAATGGAGTATTGACATATATTAACTTTTTATATTAGATTTTGAATTCTTTGA
CCCTCAACCCATTGACTTTCATGCCTTTAAGAACTTGTTAAAGCAATTATTAGGTTATGA
CCATACAAATGTTAATCTTAGTGCTTTGGCTGATTTGATACTTAGTCAGCCTTTGCTTGG
TTCAACTGTAAAAGTTGATGGTAACAATTCTGATCCTTATGCAATGCTTTCTGTTATCAA
TTTGAATACAAGAAGGGTATGAAATAATAGTTTTTATTTTTTTTGAATTTGCAAGCCCAT
ACAAGGTGGTGATGCATCTGCAATGTTTTACACTCGAGTGCAAATTTTTGGAATCTTTAG
CTAACGGTACTTATTAGGATGAGCCAGTGATTAAGCAATTAACCTCATACATCATTTCTC
GACTAGCCAAATCGAATTCGAGACTCGAGAACGAGTTACAGAAACTACTGGAACCAAATT
CTGGCTCCCAAGTTGGTCTCATAGTGAATGAACGTCTGATAAACATGCCTGTCCAAGTAA
TCCCCCCTATGTATAACATGCTTTTAGAGGAAATGCAATGGGCCATCAATGAAAACGAAC
CCTACAACTTTACTCACTATTTGCTGCTTTCACGGACTTATACTGAAATTGAATCAAAGT
TAATGGATGATGAGCGTCCTTCCAAAAAAGGTAAAAAGAGTAAAAAGACATCTGGTGAGG
AAGTTATGTTTTTCCATCCCGAGGATGAACAGTTTCGCGAAGTTGCTATTGATATTGCCG
ATTATCCCTTTGCAAACCAGGATTTTAATCCGGATGCCAATCGAGTATTTCAAGATGCAG
GAATCAAGCCCCAGGGAGAGCTGTTGCTTATGACAAATGAGGATTTCAAAAATTTGGTTC
CCAAGCTGATGGAAATTTACAGCGCTTGAGGCTAATATCTAAAAAATACATTTCGGAGAC
AATACAGGTTAGGAATTAGGTTGTGGTTAAGTGAAAATAGCAAATTTAATAGTCTTTATT
TGTTACAAGTTAAAACAATCAAACTAGAAGCAATTTGTGTGTACAGTGACTTTAGACACA
GGCGTTTTAGATTTAATGGTGTCGAACATTTGCTTTTTTTTTTAATATAGTTTAAAGGTT
TCATTCAGTTGGCTTCATCAACCATATTCTACAGCAGAAAAAGAGGTTGTCTTTTTAAGC
TATTTCCAAATAATTAGCGTAATAGATAATTAAAAAAAATTGGTACCACTCCATGATGTG
TCTGAGTAAATTTTGAGTTGACCGGTAGAGGCACAGTTTTAAAACGTAGTTGCTTATATA
CTAAAACAATTATTTTCTAGAAAGGGCATTGCAACAACCTCTAATTTTCATGTAAATTTT
GACATATTACCTAGTTCGAAGAACTCCATTATTTTCAACTTACAAAGTGCATATCTGTCT
TCTTCTTAAAGTCGCTTCTAACGACACTTCTTTGGAATTATAGTATTTCTATGGATGCAC
AGGATGAAGATAATCCATTTACGAATCTTGAAACTACTGTAGACGTCACAGAAGAAATTC
AAGATTGGAGATTTTTATCAAATGTCGAAAAGTAAGTATTTCGACCATTCAGCCTCTTAC
TCGTTGTATAATTTTTCTAGAAATGTACTAATTTCATTAAAATAACAGAGACCAAGGGAC
ATACACTATCCCAAAACGTGGACAAAAAGACTTTGAACCAGATGGCACCAATAAGCAACA
TTCTGCTCTCGACTTGAGCAGGAAGGCGATGTTTGATGCCCTTTCAGTGGAGAGATTAAT
ATCGGCGTAAGTTTGAGAATGACCGCAATTTCAGTTACGTTAAAAATGTCATAAGCTAAC
GTGGATGGCATTTAGCAAACATGCAATAATAGCTACTTGGAATGCCCAAAATGGGATGTC
TTGTGTTGAAAAGGCACATGGACCTTTGTTTAAAACCATGGGTACTGCTGACTCTCAAAA
TCGCATGTGGTTACTTCCAGAGGAGACTTTGTATCTTGTTGAACGTGGATCGATGGAATG
CTGGTCAGAAGAAGGATTGCCAATGAGTTTGCAAGCAGTTTACTCAGCCTCTATTCCTTT
ATGTGGTAGCTTAGAAAATTATCTTGTTTATGCTCATTTACGGAGATGTGGTTTTTCGGT
TATACGTTCAAACCTAGTTCCAGTAAAAGAAGATGAATATCGATGCGATTCGAAAATTAT
GAATTTCAAGGATTTATTGTTTTTAGGATTGGGAAAGGCTTCACAAATATTACAAACATT
TAACTTTCGGAAACTAGCTTTTCCATTTTCAAAGCGGAGGAGGCAGTCTATCCTCTTACA
TGATACATTTTATACATACGAAGAAGTGTATCATGATTTGCAAATTGTCCGCGGTTATGT
TCCAATCGCTTGTAATCTTATAACATCTTCAGATTCATTATTTCAAATCACATTTCACGC
ATACAAACCTTCAGCTTCATTCAAAAAATCGGCCTTATCAGAGCCTGATTTTAGGATATG
TGTGGTTAGCTCTCAGGATACATTATTACCTACTATTTTTGAGATTGATGCGCTTTTTTC
AAGTACTCCTCTTCGACAAAACATGCCACAGCATATGTTTCAAAGACTAAAGGAAGGGTA
CAGAAACATTATTATTGCAATTGTAGATTATGGAGTTATAAGCTACATTCGGCTATCGGA
TGTTTGTTTTGAAGAAAAAGTTTATACAGACTTCTCTAAAAAGGGATCTAAAAGGAAAAG
GGTGAGTAAAAAATTTCAACAATTGGTCTAAAATAATATGTTCTCGCGGAAAAAAGGAGA
GAAAAAAAAGTTCGGTGACATATCTTGAATTTACTATTAGCTAATCTTTGATGTCTTGGT
CGTGGTTCACTAGTCTTTGAATCTAACCATTTCTGGGATTGGAATATTATCGTTGAAGCG
TAAAACAGTTTCTTAGTGAAGTATAAAAGCTCAATAAGTGACATAACTTAAGTGGGGATT
TTTTCTTAGTCTATAATACGTTATTTATTGTTTTTTAATAAGTTGATGTCGATTCCTAAT
TCATTACTAGACATTACTACAAGTAAAGTTGAAGGCTTAGCTTTTAAACAAATCCACATA
TAGTCTTTACAGATTGATATTTTTGCCTACAAGTTCTATAAAGCAATTCTTTTCCGCCAT
CAGTAGGTTTTTTTTAAGACGATCATATTCTGCACCATTGGCATTTGAAGCAGTCAAAAC
CATAATGAAATAAAAATCAAATTTCTTTTTTTGATTCATTAAATTGGAAGAACTTAAACG
CTGCAAATCCTAGTTTCTCCATTATAACGCAACTGGCCAATTCAAACTTTGTCATATCCT
CTTGCAGCCGATTTAGGCGGATCCCTAAGATACCCACTCCCAACTCCCACCTCTGTTGCA
AGCAGCGTAATTTAGTAAACACCGATTAAAAACTTTTTCGAAAAGTCCTAAATAGGTAAT
ATGAAGTCGTTTACAAGAAATTTAAGAAGATTTCAGACCCCGAGACGAAATTTGCATGGA
ATCTCTTATACACCAAAAAAAGTGGAAGGAGTTTCGTTTGCCGGGCGCGAGACACCTACT
GCGACAGGTTCTTTATCCGTTGTGATTAACGCCGGAAGCCGTTATCAACCAGATGCTGGT
GTTTCGCACCTTTTGGAGAAGTTTGCATTTAAAACTACGGAAGAGCGTTCTGCTTTACGG
ATTACTCGAGAATCTGAACTTTTAGGAGGACAGTTATCAACTCAAATCACTCGTGAGCAC
ATCATATTAACAGCTCGTTTTTTGAATGAATATCTCGAATATTATGCCAGATTGTTGGCT
GAAGTCGTTGATGCCACCAAATTCCTTCCTTTCCAGTTAACAGAAGAAGTTTTACCGACC
GCTCGCATTGAGTCTGAACTGTTTAGGGAAGACATCCTTAGGGTCGCCATGGCCAAGCTT
CACGAAAAGGCTTTCCACCGTGGCATTGGAAACGAAGTTTACCTTCCTGCTTCTGCCAGC
CCTTCTATCTCTGAAATAAAAGATTTTGCTTCAAAGGCTTATGTTAAGTCTAACTTTTCC
GTTATTTCCTCTGGTCCCGACGTTCAGAAGGCTTCTGACCTGTGTGCTAAGTATTTTGCC
GTAATTCCCGATGGCAGTCCTTTGAAGTCAGCACCCACAAAGATTTCTTCTGGGGAATCA
CGTGTTTATTCCAAAGGAACCAATTATTTCTGTTTAGGATTTCCAGCTCCCGCTGCTTCT
CCTGAGCTTTTTGTGTTGTCTTCTATACTTGGAGGAGATGCTGCCGTGAAATGGTCTCAT
GGAAACACTCTCCTTGCTAAGGCTGCTGGAACTGCTTCTGAATACAAAGCCACAGCTGTT
GCTGATCTCACTCCTTATTCGGATGCCAGTTTGCTATCGGTCGTTATTTCTGGCAGTTGT
CCAAAAGCTATTAAAGCTACTGCCTCTGAATCTTTCAAGGCCCTTAAATCATTATCTTCT
AATATCCCCAATGATGTTGTTAAAAGTGGCATTGCAATGGCTAAGACTAAGTACTTGTCT
GCTTTTGAACCTGTTACTTTGAACGCCATATCTGCTTCATCTTTAGTTTCTGCTTCAAAA
GGATCTGATGCCTTTATTAGTGGTTTCGACAAGGTTACCCCCGCATCCATCTCTAAGGTG
GTTTCATCTTTATTAGCCAAACCTGCTAGTACAGTTGCTGTGGGTAACCTTGACGTGCTC
CCTTACTACGATGAGCTTTAGGATACTTCTCTACAAATCTTTTTTTTTATCGAAAATCTT
TCTTTGAAAACTTTTTATACACCATAAGCTTAGGATGATGTTTTGAATTATTTTTTTTCG
TAACATACTTCATTACTCAAATTCACAGTCCTGACGGATCGTCTTATGCTCTCCTTTAGG
CAACAATGATTAATGTTATTTTCCAATGAATTAATACCAATAAATAATTTGGTAGTATTA
TTATGTATGATGACGATGTACTAATTTGTAAAGAAATTAAAAAATATATATTTATATATG
CAATGCAACATTAAAATAATAGTTTCTCTCTTGAGATTTCATAAACAATAATGATAACTA
TCGCCATCAAGAGCGGTTAACTTATATTAACTTCAGATTTCTCATAAAACGGATTTTCGA
AGACAGTATGTTATCGTCTTTATGCAAACATCATTTTTTAAAAATTAAATATGCAAGCCC
ATGGCATCTTATCTTAAAAATTTTACCTCACAAATCACCTAATTTGAATGCTTTGCTTTC
GGTATGCTTTTTAATTCAACAATCACAAAGATTCAAGATTATTCAACATCAGGTAAACAA
GAGTTATAAGTAGCTGGGTTGAACTCTTGAACGTTTCACTCCCAATAATTATATACATTT
CCAATATAATAATACACGTGAATAAATAGTAAAAAAATATAAGCGATTAATTTTCGTCGA
GTACTTTTCTGCCAGAATCGCTAATTAGGAAATCCAGAAAAAGGATACTCTCTGTCATAC
TCTGCCGATAGGCCGACCGCGCTAGCAAGTTTCTTCTTCATCCCAATAGTTTCGTTTACA
TGAAAAGTTACCCCATAGCCCTGTAAATATCGAGAACATTGACTCCTAGACAACCGATCT
ACATCTTGAACTGAAGTAATTGGAGGCAAATCAGGGTCCGGATTATTACCATTAATAAAG
GGAACAGGCGAAATCACGTATGCACCCTTCCTAAGATCTCTATTTTCCGCACGAACTGAA
CGCATATCGAGAGTATTGACCTTATTTGTGAAATTAATCATATTTTCTTGCATGGTGTTC
ATGGTCCCTTGCATAGTGTTCATGGTCCCTTGCATAGTATTTATGGTTCTTTGTAAATCT
GCCATACCGCTCATTAAAAAGTTGAGAGTCCTATTCTGCTCCTCGCGGTCTCTTTGGTAC
CAAAGTGGCGGTTGAACTTGGCTTTCTCTCTCAATTTCCAACGCGGTCCACTCATCCACT
CGACGTTGAAACCTTTTTACGCGCTCATTTGTACGAATCTCCTCTTCATTCAGGTGAGTT
TTGTTCTCAAGGGCCCTTCCCTCACTCTCTAATATTCTATTTCTCGCTTCTATTCTTCTT
TTCTCGAATTCAACTCGAAAGTCGTTTAAAAATCTATTTCCCTCCTTTGAAGAGGATTCA
GTTGGTGGAGGAATATTAAATTCATTAGAAAATTCCTCGTTCAATTCACTTTCAGTATTA
GGCATAATTTATTGTTTACAAATTAATATTGTTTAGTAGTAACGCGAATAGCAAGCTGGG
TGCAGCCAAGTGTAGTGGTACATGAATATGTAAACACCAAAGCTGTAAACAAAAAAGCTT
CCGGTAGTTGTTCATCATTTTTTTAAATTGAAAAGGTGAGTTGATGATTAAATTATGGTT
TTTGTTAACGGCATGTTTTCAAGTTAACTAATTACGTTTGCTTGAAGAGTTAATTCAACA
TTCCATAAAAAATCTCCATTTCTGTTAACATTAAGAGTTTCGGGTCTAAGCTAAACTTAA
ATTTATCTATGTTTGATATTTTAATTTAATTTGTAACACATTTTTCATCCTTTAACCGTG
AAAGCTCATTTGTTTGTTACTATGTTTTGCTTTTGAGTTATCAAACCAGTCAGTTGATCA
TTAAAGAAACATATTAGATATTATTAAAATTTTCTTGCTGTAAACGTCAATTCAATAATC
AGCTTGACTTTACCTTCACTGAGATTAAGGTTTAATTTTCCATTATCCTTTAGAATCATT
GCAAAATTTTTGGCCTTCTTCAGTTCTTAAATATTTCTCGGATCGATCGCTGTCTTTAAT
TTTCTTGCCAGTTCACCCACGAAAAGGAATTCGATTAAATATTCATACTAGCTGAGCATT
ATTTCTTTTATACCTTCTCTGTATCCTAGTCGTCTAATAAAGAAAATTTTTCTTAGCGCG
AATCTCCATTGACTGATCATCTTTACATATACCTTTTCGTATTTAAACCTCAATTCAGGT
TAAAAGTCGATTTTCTATAATACGAAACTCTCCGAATTTATTACCATTGTCATTCCCCAA
ACTGTACATATTGACGTCCCCTCCAACACAACATACGGTTAGCTTTGAAGCATCCTCACT
GAACCCTCCGTAAGTTATGGCTGAATTCATTTCCGTAAAATTTTGTATGAATGGATTGTT
CAATCTCAAATCCCAAACCTTTACAATGCCATCACTGCCTCCGGTAACGAACAAATTCCC
CTTAGGCTGCCATTGTGCCATATTTATACCTGCATCGACTTCCTCTTCATTAGCCCCGTC
AAAATGTATCATTTTGGTTTTTCCATGCTTAAGCAAGCTAAGAGGTTTATCTGGTTTACG
CGAATCCCAAACAAACGTCTGGTTATCTGTACCACTAGAAGTTACCAAGATTCCAGAGTT
ACTTATGGTGGCATGGTTAATGTCTTTTTGCGTTGTCGTAAAGTTGAGACAAACCTTATA
CATTCTTGTGTCTAAATAATATACTCTTCCATTGCTCAAAGTATTGCTACTTGCGACAAA
TCCAACTTGAGAAGGATGCATATATAAGGAGGTAAATGCTTCGTCAGCGGTGTTGAATTT
TTGAACGAAGCTGGCAGTGGAAGCATCAAACAGAGCCAAACATCCTCTGTTATTAGAAGT
ATGAAAACTATCATATCCAATAATGACTTTGTCAGATGACCTTCCCAAAAAATTGGAAAA
TTCAATCAAAGATGCAGAGTACCCTTTTTCTAGAGCTTCTGGATAAATTAAATTAGCTGA
TGTGAGAATTTCTCCTGTTGAGTTGTCAGTGCTCAATAAATACCCATAACCATTTTTGCA
AGCTACTGCAAGTAAATCGTCATCAGATAGAGCAAGCTTGTGAATATAGTCTGTGGGTGC
ATTAAAAATCCCACATAAATTTCCTTCCATATCCCAGACTTTCACAGCATTGTCGAATGC
ACCTGTATAAAGAAACAGATTACCCTTGGAAAAACACAAATCTGATATCGTAGAGTATTC
CTTTTCTCCTACTTGATTAAGTTTATAATGGCTTTCCAATGACTGAATAGTTTCTGAGTG
AAAATCACCAATCCATAAGTTGCCTAGTCTATTGTAAGCACCATCTTGTGCTGTGCTGCC
TAAGGCAAATTTTTCGCACAATGGATTATATGCAACGCACACTGTATCCCCACTAGTTTC
ATTGAAATGTTTCCAAGGTTTTAAAAAGAAAACTGATTCCCCGTCCATAAGTTGATGAAC
TTGTTCTCTTTGGAAGTAAGATGAGCCTGCATTGTAAAAGGATTTTAAGTAATCTGGAAG
TAATTTTTTATTCTTCTTGTATGTTCGTAAAATGATGGCCCCATGTTTGTCCACAGGAGA
CAAGCTGGGGTTATCAATTTCAAATTTCTGGCAATCTTCATATGCTCGTCCAGGAAGTTT
TGGAGAAATGTGGGTCGAATAAGCATCATTGAACTGAACACTGTTTACCGGTCCAAATTT
TAGTTTAGCTTCTTGTAAAATAAAGCATTCCTCTGGTGTAAAATCAACATGAATGAGTGA
TGGTTTATCATCGCCTGTAATGCTATTTGAAAGTAAATGAGTGTGTTTTCTCACTCTTTC
ACTCAAATAAGGACGTGAATTAGGTAAGAATGTCCCAGACGTTAGTAAAAGTTGCAATTC
TAATCGTTTATTTACATTTGATGGAACTTTTGCAATTGAATGCTTCGATATTGATAATGA
CGGTTTCGGGCAAGGTAGCTCTGCGCGATAAAAAGGATCATAAATCTCAAATTCTTCCTC
AAAAAATTCTTCGTTATTTGTGTCAAAGTCAACCTTGGGCAATTTAGAAGAGACGGAATG
CAAATATTGCGTATCCGTTCTTCTTTTCACCCGTGGTGAACTATTAGTCATGCCATAAAT
AGGAAATTGTTTGAGAAATTATTGGGCTTTTTACTTTTAATCCTTCAGTGTGCAAGTTCA
CTAGTTTAACAGAAGTTATGGGTTGCTGAGTGAGTTTAAGGCACTGATTGATATAAAGAA
TTTACTAAGTCCAAAAAGTATAAAGACATTCCAAAATCGAAAATATTATATTAAAATTGA
AGATATAATGATTATCTATTGAGTTACTATTATTACAAATTTATCAGTCAAAGGTAAGTT
AATGACTTTACATTGAAGCGATAAAATCTTAACTATGTTTAATTTGTTTTAAAAAACTTT
AACCGTTCTATTGACAACTCAATAATAAATTATATCCATTAATAGGAATCCCCAAAAAAA
TAAATAAACTTCCAAAACGCATATACTGACTTAGGGAATTACGGTCCAAAAAACTAGGAT
AACAAAAAAAATGCAAAGGGAGATATGGCAGGTATATAAAAAGGAAACGGCCAAAATTTG
GGCTAATTTTAAAAAAACAAAATTCTAATTTGAGAACAAGAATTGCATATCCTCGACAGA
AAGCTGGTTCAAAGCCTTTTCGTCTTGATCTATGGTTGCATGTATCATCTGAGCTTTCTT
TTCTTGTAGTTCAATAATTTTGCTTTCAATGGAATTTTCAATACACAGGGTAATTACTTT
TATCGGCCTTTTTTGTCCAATACGATGAATTCGATCCATTGCCTGCCACTGTACAGCTCC
ATTCCACCAAGGATCCATCATAAACACTTGAGATGCCTCTGTAAGGTTCAAAGCAACACC
ACCTGCTTTCAACGAAACTAGAAAAATGGTAATATTAATATCGTTACTGAAAGCCTCAAT
AGTAGCTGCTCTCGCTTTGGGGGTCATACCACCATCTAGCTTTACACAATTAAACCCGGC
TTTTCGAAGTCGCCAATGAATGAGATCTAACATAGAAGTAAATTGAGAGAAAACAATCGA
CTTCAGTGTTCGGTCCTTCTTACGAAGTAAGTAAAGCTCCTCAACTAATGCTTCAATTTT
TGTAGATGAACGCCAACTATTCATATCAATTCTATTCAAAATCGATGCATTCTTAAACTT
CTCTTCAGAAAAATCTTCTAAAGCAGGGGCACTAAGATCTATGCTTAAGGGAATGAAACA
ACTTGGACAGTTGACATTTTCTCCATCACCAGCTGCATTGATATATTCCGTAACGCAGAG
TCGACAAAATGTGTGATGGCAACGTGATTCTATAGCATCTTGAGCGACTTCGTCACAAAT
CTTACAGACGATATTTTCCTGATTTTCAATATCAACTGTTTTTCGTTTGCTAGCTAACAC
CAGGTCAGGATGATCTGCCATTTGGCGCATTCGTGTAATTAGCTGGAAAATGTTTGCATA
ATTATTCAAAACGACACCTTCAGCAAGATATGTATTAAATTTTCTTTTTGAATCCATATA
TAAAGATTGGTATACATCTTCCTCTTCTTCGTTGAATAAATCTTTCCTCACTTCAACGAC
TCGAGGAGGTAATCCAAGGTCATCAGCCCTCTCTAATTTTGTTCGACGTAACATAATGTG
TTTTAATAAAGAATGCACCTTTTTAAAAGCTAGCTTTCCTGGACCTTCGTATCCAAACTT
TTGTATTGGTTTTAGCATTTCAGCGTTAAAATAGCAAGTATGACTCATTGGTTTATGGCC
GCATTCGTCGCAATTACTTCTATCGGAAAATCTCCAGTGCAGAGATTTACATTCACATTG
CAAGCAATAGTAGTAAGCAAAAGGATCTGCCCGTAGGAACCGAAGAAGTGAAAATAATTC
TCCAATACGGTTTTGCAAAGGTGTTCCTGAAAGACATATCTTTCTTGTCGTTCTTAAGCC
ACAAACAGCTCTGGCAGTGTTACAAGTCCTTGATTTGATACCATGGGCCTCATCAAGTAT
AATTCGGTAAAACTCCATTTGATGAAGTAATGACTTTTCTTTTACAACACCGTTTTTCCT
TCTGAATCCGCTGCGTTCCTTCCTGTAAACTGATTCAATTACATTGTAACTCGTTAGTAC
AACATCATAGCTCGAAAGCTCTTCTCCTGAAATATCACGAGCCTGGCCATAATAAAGATA
TGTACTCAGTGCTTTATTGGTATGTGTATCAATCTCTTCTTTCCATTGCATAATTGCTAC
AACCGGAGCAACAACCAAGGTTGGCTTACCTCGAGGTTCTGAAAGCAACAACGCAATTGT
TTGAATAGTCTTACCCATACCCATTTCATCGGCCAAGATTCCTCCACCAAAAGAGGAATC
TTCTTGTCGTTTTAACCAATATACACCTTCTCGTTGAAAAGGGAGAAGGTTTAGGACCAA
CTCTTTGGGTTGCTCGATCTGTTTCACTTCACGAGGTGCTTCTTCTTCCAATTTCTCCCA
AACATGTTCTAGTTCAGGATGTTGTCGAATCAGACGATAATGGGTTCTTTCATGTGATGG
AATTGATTTTGCTTGTGTTCTAGAGGAAGAGGACGCGGAAGAAGAAGCCCTAGCGGATAC
CCTCCTTCGTTTGGACTGGTAACTTAAAGGGATTGACTCTTCATCACTTTCCGTAGAAGA
ACTTGGAGCAGCTTCTGGAATTTCTACTTTACTATCAAAAGTTTCATCCTCTTTGATATC
AATTATGCTAGCAACTTCATCACTTTCATCATCATCAATAAATTCGGATTCATTAGATTC
TTCTGGAGATGACAATGGCACAAACTTTTTTTTCAAATTCGAGGACCTTAATGAACGTTT
TCTGGCACTAGAAAAACCTGTATTGGGATTTGCTTCTACATTGTCTGTGCTGCTACCGGT
GTGTGTACTGGTATCAGAAATGGATAATGGGGGTGTCGAATGTTGAGATGAGGTGTTGTT
TGACTGGATAATCAATTTTTTGTTTGTTGACAGAGGTTCTTCAAACTCTTTTCCGTTCCA
GCGCGTTGTCTCCATATCTAACTTGTCGTCACGCTCGACTTGTTGATTTGAAGCATTCCC
CTTTGAATCACCATTATCATCTAGAACAAAATGCATATTTTCTTTTCCCTTATTACTATT
CGAGTTTATTTTATTACATGACGTCCCCATTTGTGAATGTAAATTGTTTTCAACCACTTC
CTCATCTTCACTTTCTACAATAATGCCCGCAATGGGAGAAGATGACCATTCATCTTGATT
GCCTGGTACATCATGAATGTTATTTATCTCTGAATAAGTAGTAGAAAATGGAGCCTGCCC
ATTACTTTGCTCATCATTATTGTCTGCTTGAAGAGACGCCTGAGTAGTATGGTTATTGCG
AGTATTTTTCCAATTTATGGAATCAATTGTATCGTTTGAATTAATATCTACAGCTTCATT
TTGTAATTGGTCCACTTTTAGAGTAGATATATGCATAGTAGTGGTTGGTATGAGACAAGT
TGCCACGCGATCTGAAGCGATTTAATTAAACTCAACCACACTTCCACCTTATCCTCAGCA
TACTAAGGATTTCTTTAAAATGTCAAGTGGAAGTCGGGTGAGAGGGCCAAATTCTGCTTT
AACAGAATTTTTAAGAGTATGTGATGACTCTTTCTTAGCTCGGAGTTACTAATGCATTAT
TCAGTCTCAAGGTATCAATGCTTCAGCATTAGGACGTGCTCGTCCTCCTCGTCAAAGCGA
GGAGTCAGCAGGGCAATCGACTGGGACAGAATCAGAAGTTATTCAAACACCGACTTCTGT
TGAAGAAAACAACGAAGATGAAAACTCGATGTCGACAACGACAATTGAGATACCAGTAGT
GAAACGACGAAATCTACGAAATCAAAAAAAGAAGAAGAAAACGGATGAAGAAGCTGAAGA
CAACGAGGACACTTTTTCAATGAATTCAAGAGCTGGGTTTTCTTATAAAGCAAGGGAGCA
TACGGGCAAACTAGATTTTTGCGCACACTGTAATTGTCGCTTTACAATAACCCCATACAG
CAAATACAGCAATTCAGAGAAAGGGTGGCTATGTTATCCTTGTAGTCGTGGTGCTGAAGA
TCGATCGGTACCTGAATTAAGGACGAGAAAAAGAAAAGCATTGACCCGTAAAAAGGTGGC
TGCCGCTACCATGGACGAAGAAATCAGTGTTCCTAAGCTTCAGGATTTGTGTATACGAGT
TATTGCTGAATACATAAATGATATCGAAGCTTTTGGGGATATTGGCCAAGTGAATATGGA
CAAAATTAGCCAAATAATTTCAAAAAACCGCTCTCTTAACGATACTACTGTGAAATTATT
CTTAAGTGGGGGTCAAACTGAATTAAAACTATATGATTGCTCAAAGATTACAGCAGATTC
ACTTTTCCAAATTGCTCAATACTGCCCAAATCTTCAAACTTTGCATCTTACTTATTGTGG
TCAAATGCAGGATCAAGTTTTACACTTTTATGCGGATCATTTGACTGAATTAACAGATGT
ATCTTTTCAAGGTGCCTTTTTGGTTTCTTCCTCAGAATGGATAAATTTTTTTAAAAAACG
GGGTTCAAAGCTTATAAGTTTAGAGCTTACGGATACTGCCCGAATTCATGTTTCGGTTAT
CAACGCTATAGTTGACTGTTGCCCAAATTTGATTAGCCTTAATCTCTCTAGAATTTTCTA
TCTTGATGATGAATGCGTCCGTCTATTAGCTGGTTGTAGAAATCTTGTCAGTTTGAAGAT
TGAATCACCAGGCGGCATCATTAATGATGGAAGTATATTAGATGTACTAAACCAAATTGG
AAGCGGTTTGCATACTCTTAGTTTATCTGGTTGTACAAAATTAACTGATGAAGTTTTGAA
ACAAGGTATAGGTCCTTGTTGTGGTCGTCTTAAGCATCTAAATTTAAGTGGTTTGGAACT
GTTAACAGATGATGAGGCCTCTATAGTTTTTGGTGAATGGAAGATTCAGTCAGGCTTAGA
AACATTGTCCTTAAGAAGGTGTCTGTCACTTGGAGATAAAACTGTTCGTGCAGTATTGGT
TAATTCAGGGCATACGCTTCGCACTCTGGATTTAAATGGAATGTCGTTTGTGACTGATGA
AGCATTACAGTATATTGTCAATTTTCCATTACCTATGCTAAAAGCACTTGATGTCAGCTG
GATTCGTGGAATGAATGACAAATTGGTATGCGATTTTGAAAGCAAAAAGCCAACGCTTGA
GAAGCTTTTGGTATGGGGAGATAATCATGTCCTGATGCCCTCAAATCGGTTACTTCTGAT
AGGGCGTGAAGTTCAATAAGGATGGAAATACTTTCTTTTTCAATTTTATCAAAGGTTTTG
GTTGTTGAATTGGACCTGTAATTATTCTTTTGAAAAATTTAATGACTAGTACATTATTTA
AATTATCACCTTATTTGATGGACACTAAGTTCCTTGAACAGCCTCAATCTCTTTTTGTGT
CTTTCTGATATTATTCTTTAACGAATATTTGTATTTGAAACCTTTTTATTTTTAATTTTA
TTTATTTATTTATTTTCAAATTAGATGATATGGTCTGCGAACAAATAGCTAACCATTTCT
TTGGGTAATGAATTATTTTTTTATTACCATTCCCTCTCTTTACGAATGGATCTCCGAATC
ATTTTTACACATAATCAAACAATTTAACTACCTTTTTTTAAAAAAAAAATCCCGCTGCTC
TTTGTTGTAATACAAATATCAAGCAATGTAATTTTCAATCACCTTGATTTTATATAGCAT
AAGATTATGAATAGTACACTAATGGTATTGCTTGCCAGACTAAAGAGGTTTACTGCTGCT
CGGAAACGCAAAGCTCATCAAACAAACATAAATATTTATCCTTTTTAAACTGCAAACATT
CTTTTCAAACTGTAATATTCCAATCGCCCGACAAGTTGGGCATATGAAAAATCAAACAAT
TGAAAACACTGGTTATGCAAGTCGATTTGGCTATCTCACAATCCGCCAGAAAAGTATGCA
AAAAATATATACAAGGGCAAAAAAAAGCAAAAAGCAAGACAAGCGGTATGAGATTAATAA
TAATATTGAGTTGTAAACCGAAAATATTGATTCTAATGCTTAATAATTCGAGTTTACGAC
TACGGTCATGAGCCTCACTATAAAGAAGAATTACTTAGTGAGCCGTTGATTTATTATAAA
AGAATGATTAAACGTACCTTTTGTTCAAGACTACCATTCTCCATTAAAGATATGCGATTA
TCTTCCTCTTGATTAATATACATCTTGAAAGAGGCTATCTTCAAACCTGTGAAATATCAA
TTTATATAGAGCAAATGGTCAGAGAATGAATGGGCTTTCTTCCAGAAAACGAGTTCACTT
AAGCCAGGCAGGCCCTAGTCCTTATATACTATCTATTTTGCAGAGCTAAAGGGACGATTG
TTAAAGCGGAGATAATGTCAGCAATACTGGACTACTCTATGATACACCATGTTGCGTATT
TCTATATGTCACAAGCTCTACATTGTATTATAGATACCCGTTGATAAAAACTATTAGTAA
GATTGTAAATGGAGCTTCTACTGAACCTCGTTTCACAGTTCAGTTATGAGCTATATCGGT
GACCGATACTAACAGACTTCTTATAACAATAAATATAATATTGTTAGTTAACATACCGCA
TACCGCTACATTGTAGATCGCAAGTAAAAACTCACCGCAGTTCTATATATCGTTAAAACA
GATATCAAACTGCGTAGCTAACAGATAACATACATTTATTTACTCACATATATTCTGGTT
AATTATCAGTTTACATATTAAAGAAATGGGGACAGCAGAACTACAACTTTGCAGTCTCAA
CTTACAAACGATATAAAACATCCTTCATCATTGTATAGTACAACATACATACAAATGAAT
ATTCGACAATGTGTTATAACCAACTCATAGTTAAAAACAACTTTAGTTATGTTGAACTTC
CTTGGCTGTGTTGAATAAAGAATTCGCAGTTGCGACTTTTATGTAAACAAGTCATTAAAC
TCAGTTTCAGAAGCAATTGAAGGGCTTGTTATATATATTATGTGACATAAAGGTTTTTTG
AATCCGGTAGAATGAATAGATTGAATAAATACAGTGAACATTTGAACAAGTGATTTAGAT
CTATTTATGTTTAAAGTGCTTCGCTGATCAATAAGATGAGCGACAAGCGAAAAAATGAGA
TATGCTGAATTACTTCAGATTTTGTTTTCTTTGGTTATCAAAATTCCAAGCTTACTCGCT
CGAATTTCTCAACTATTAATCTATGTGTCTCATCATCGTTCATTCCATTAAAACCAATTG
AAAATACGGCTACAACAGTAAAACAATACGATTGTTAAAATTAAAAGAACCCTAGTCAAT
GCTTAATGCGATCATTGTTTTACGGAATTTTTTAAACAAATCAAAGCTTTATACCAAATA
CACTACAAGTTTATAACTGATCATACACAATACTCTCTTGTAAGCACACAAAGCGGGATA
AAAAGTTAAGTAGATTTAAATATTTAAACATGAACTCTTTGAAACTAAAACATAGCAAAG
CTCTGCGCCCGAATAATAAAAATATCAGTCATAAAAAATATGCGAAAAAATTTTTAGACA
TGGGTGTAAGCAGAACACGAGCAAAACCATATGTTTCTCGCCAGGATCACAACCCACAAA
GATACATATTGTTCCACTTTGCTATGTTTTCAAAGGGTATAGGGAATTTCGTTGGCAATT
GACTTCTTGTTTACACCAAGTAACCAACAAAAGAGGTCTTTAACAACTCTTCTTCATTAA
CCCAATCATGATGTTTAACTATATAGTTGTTAACAAAACTGCAAATAAAGAAAGGTTTGT
AAATAAGACTTACGGTACGGTTTTGTCGCATCCACGCCAGAGTGCTTCAAAATCTTCTTC
GGACCAACTGGATGGTATGGGAGATACGCAGTAACATTATACACCTTTCCTCTTATTGCC
ATCCAACAATCATCGGGGCTACAGTGCTTAGCAAGTTCTTCAGCAGTAACGGAAATGGGA
CTTTCCACACCCTAAAGCATCGGTGTTAGTAACACAATAGAACAACAATAAAATTTCGAC
CAAATCAATCTCATTTCAATACAATTAGCATTGAAATTTCTTAGAGTAGGCAAAACATTA
TCCATGCGCAGAAATTTAACTTTTTCATACCGATAAATTTTTTCCACTGGCTACTAAAGC
ATCCCAATCTTGTTGAGTATGTCCAGGAGGAATCTTATACTTATTTTTTCTCTTCTTTCT
CTTACGTTCTTCTTTCAACCCTTTTGTATCCTTAGAATTCGCTTCCTGAGTAGTTCCATC
CTCTTCAGAAGTTCCGAGTAAATTTTTGAAAATCGACAACATTGAGTGTTTTAAAGAGGG
AAAAGATAAATTCGTAGTTGCTTGATATTTTCACACTTATAAGTTGATAATGGATACTTT
AATAGTATATACCAATATATATATAACGTTTAGTAAATCTAGATGTTATCTGATCGTGAA
AATGATAACAAGTTACAAGCCACAAACGTTTACTTTGTTCTTTAAACATCGCTAGTTGTA
GTATAATTTCGGACAAACTGGTGAAATCACTTACTGTGGCACTCTGTTTGTCGCTATTAA
CAATTTTTCTATTTCATGCTTTTTATATCTCATAAAAATGTATTTGGCAGGTTCTAGTAA
TGCGCATTCAATTTGTAGTATTCTTAAATAATCATTAAACGACAAGGGCCTTCCGTGCTA
TAGTGTTATGCTTTGCCGTAATTTAAAAATGTTCAATTTAACTACATTACCAGTTGCGAA
GTAAACATCTATATTAGGTGCTCAACTAAAACTCATGATTAAATACCTGCACTGTTTGAA
GCGTCTTTATAGGAAGTTTATCTACTATTTGACCTATAAGCACTCTCTTCATACAAACAG
AGAATATCTCCACTTGGTTCTGAAGTAAATTTAGATTTCACATTTAAATTATCCACGCAA
GTTGGTTTCATTATACTCAAGTGTGTTAAACGTGAATCAGGGTTATATGTATGGCTATGT
TCTTAGCTTCAGCATCAATAAAATCCCTGGATATTGCTGCTGATAATATCAATTTAGAAT
TGTCTAACAAAAGTACAATTATTGATTTAAACTCTCACCTTTGAACAATCAAGTAGACTT
GGTAAAAAGGTACTGACAAGTGCTACCTATCATAATGGAAAAGATATACTAATTAGTGTA
AAACAATTAAAGGTTATCAAGCGTTGTTCATATAATTGATCGTGGCCTGTCTGTTGAATC
AGTTTATAACTGAACTGAGGAACGAAGTTCAGCTTGGACTTCTTTATAATCTATTATAAT
ATCAATATCAAGGGATGTTTTTGTAAATAGAGGGATAGTTATTATATATACGTTCTTATC
ATTCCTTAGATGGTGCGACACTGACAATTCCTAATTGACCACATGTTATTAAAATTAATT
CTTAATTTTAAAAAAGACTACAAGGAGGGTTCAATATAACTTGACATTCTCCATTTAGTT
GCAAACTGTTTTTCAAACATTATACTATATAGGTTTTGTAAATGCGCGAGTGATAATATA
ATGTATTTGTGTTCTTAACAACCAACCTCTTTAAGACGATAAAGCGGTGGATGGCCAGAG
TCTTAAAATATCGCAATCATACGCGTCATTATAAGCAGTTAACAACTGGGTGTTGGACTT
TTTTAAATTTTTCGCCATCATTTCCTTTTTAAGCTTTAAAGGAAATGTAAGCCATAGTTA
AGCGAGAAATCAGAGTTCAAGATTCTTATTGATGTGCTTCCAAATTTGGCTTATTTATTG
TGGTAAATCGGATATGTTTATCTGAATTCAAATAAAAGAATAAAGCTTAAAAATAATGTC
ATTAAGAAACTAACTATGAACAAATAATATCGTGAAGCTAGTTGTTTCTAAGTATAAACG
ATTGTGTAAATCTCTTATCGCATAAAAATAATAGTCATTTGAAAATGAACCATCAGTTTT
TGTCTTTATAAAGCTTTTGAATGATAACTATATAAGATGCAAGTAAAAAATTAAACGAAA
ACATTACACTTAATTGTTAGAATGTTTTCCCGATCACTCAATCAAGTCTGTCTTCAAGGA
GAAATTAAAAATAATTATGGACCGACTTATGAGTAAAACTCTGTTTATTCGCTAGAGGAA
AATGGGCTGAAAGTGTAGCTTTCGTCGTAAGCCGCCGTCAACCCTACGGCCTTGGCAAGT
TGTCTTTTCCAAAGAGATTGATCGTTTTCGTCATAGGAAACTCCGTATCCCTTTAGATAT
CGAGTACAGTTCTCTTCTGACAAAGAATCAATGTCTTCGATACGAGTAATTCGAGGCAAA
TTAGGGTCAGGAATATCGCCATTAAAAAAGGGAACCTCAGTAATAGGTTGAGCAAAACTT
CTCATAATCATGTTGTTATTTCGAGAGAGCCTCATGTCCATACGATCAACCTTTCTCGTC
AAGTTTGACAAATCGTTTCGCATGTCTCGTTGAACATCAAGGATTTCTCGAACTATATTA
AGAAGATTTTCTAGGCGTTCATCCGTCGACTTTCTCCACTCATCCGTCGACTTTCTCCAC
TCATCCATCGATTTTCTCCACTCATCCATCGACTTTCTCCACTCATCCATCGATTTTCTC
CACTCATCCATCGAGTTCCTCCACTCTTTATCCTCTTCTCTGGCTTTCTTCCATTCTGCT
TTATCCTCTTCTCTGGCTTTCTTCCACTCTGCTTTATCCTCTTCTCTGGCTTTCTTCCAC
TCTGCTTTATCCTCTTCTCTGGCTTTCTTCCACTCTGCTTTATCCTCTTCTCTGGCTTTC
TTCCACTCTGCTTTATCCTCTTCTCTGGCTTTCTTCCACTCTCCCATTTCCCTTCGAAAC
CAAGCTGGAGGCTCATCCAGACTATCTAATGTCCTTTCAGATCGGCCCCATTCATTTACA
ATACCGCGAAATAGTTTACAACGGTCATTGTAACACTCGTCGTTATCAAAAGCCCTTTTC
TTGGAATTGAATAACGTTCTTTCAGATTCAACAACAAAATTCAAATTTTTCTCTTTGTCT
TCCAATGCTTTCCTTTCTAGCTCAAGCAACTTTTTTTTTGCCGCAATTTCAAAGTCGTTC
AAAAATCTCCTTCCCTCCTTTAACGACCGTTCGCAGGGAGGTTGAACGCCCAAGTCATTC
GCAAATAGTTCATTTAACCTATTGTCTTCTTCAGACATAGTTAATAATATTTTCTGCTTT
ATAACGTCAAAACGTGGTAGTACGACAAGGTACAGTTTAGCAATGGTAATTGTCAATTAA
GTTGATGTACACAGAGCGTCAGCATTGAGCAATGTAAACAAGCCAACCCCATATACGAGA
AATAATTCGCGTTAGCAAACACTACACTACCTTATGTGACTCACTGACTATTCACATTTG
CTGAGCATATCTCATCCATCTGATCATGAATGGATTAAATCTAAAAAAAAATTAATTGCT
CAAGCTTTGAATGTAAAAACTTTGTTCTCGTCTTAAAACTTCAATCAAAAACGGTAGCAA
AAACATTAACTTAAATGCTTTGGCCGGGAATCGAACCCGGGTCGAATCGATGGCAACGAT
TCATTATACCACTAAACCACCAAAGCCGATTTATTCCTTCATAATTTTTGTACCATATAA
CTCTTCAAAAAAAATTTACTCCAGTGTACTTAAATTTTGTTATTCCAATATGAGATTTAT
TTTGAGAAATACGGGCTAACAGTGGAAATTTTCATTTATCTAAAAAAATTTTTACAATCT
CGGTTTTTTATTTTGCCCTTCTCTATACCAGCGATAGATAATTCCAGTTAGTTTCAGGTT
TCCCTTAAGTATGTTAAGATGGCTTGTCTGTTCATACTGATACATTTTTACAAATAAAAT
CACCATAATCTTGCCGCTGTCATTAGGAATTTCACTTACAAAAGACGAATATGTTATAAT
AAGAAGTTGCCAGATATCAAATTACCCCAATCACCATTACTCTGCAAACTAAGATAGTGT
CCAATATTAGTCAGCACAGTATATTTTACCATCCTTTTCCTATTACCTTTTATAACTAAT
ATTCATTTTTGCTTATCGATCACTGAATATTTCTCTTCTCGACAGTTATAAATATTAATT
CACATGTTTACTAAATAGAGGATTATAATGGAAATGCATCTTATCACTATTTTTTTTATC
GAAACTGTTTGGTTTTTTGGTTGTAAGCTACGCAGTTTGGTATCTGATTTAAGGATACGT
AGAACTGCGGTGAGTTTTCCTTGTGATCTATTATATTACAATACACGGGTTGTATAAGTA
GCAACTGAGTATAGGTATTGTATTAACTGGGTTATAATGTTACCTATCACTAATATAGCT
CATAACTGAACTGAGGAACGAGGTTCAGCAGTAGCTCTATTTATAGTATTCAGATAATAT
AGATCTTAATAGATTATCATTAAGATTAATCTCCATATCGTATCATACATGGTACGATAT
ATAATTAGAACATGTGACATATAGTGATACACAACGTAGTGTATCATAGCGTAGTGTAGT
ATTGCTGACATTGGTAAACACTGTAAGTTCGTACCCTTTTGTTTGGTATATAGTATAACG
TATTAGTGTGTACTTTGAAAGTCTAGCTTTACAGCTTGGCATTGTTCATACAAACGTCTT
CAGCATATCTTTCCACACTTGCTCTGTACACGTATTCTTTCCCTCTTATCATTCCTGTTT
TTCTTTTTTAATAAACCAACATGCCTGTAAGTAGTTTTATCTTTAGAAATCTGTGCATCA
TGGATCCTAACTATGTCTTTTAGACGGTTCAAACTCCCTCTCAGCGTCGTGCAAACACAC
AGTTTCAGAAGAACATTACTCGTCGTGTAAAAACAAATTCAAAAGAACGTTATGTTGCCA
AACATCCTCCTACCAAGATTCCTCGTAACATTGCCAGTAAGTAAGAATTGATCCTATTGT
TAGCAACTTTGGCTTGTGTTTCATACTGACAATGCATCTTAGTGTTTTTTATTCTTCTCA
TGTCAGGAGGAATTATTTTGGGAATACTTAGATTTCTTTTGACGTTTTTTTCTTAAGAAC
ATGTGATTGGAGCAATTTTAAAACCTATTTGCACCGATATTGTGTATTATACTCCGAGAA
AAAGTATACTAGTTTTGAATAATAAAGCTTGTGATATTGACGAAACTTTTTGACATCTAA
TTTATTCTGTTCCAACACCAATGTTTATAACCAAGTTTTATCTTGTTTGTCTACATGGTA
TTTTACATTCATCTACATACATCTTTCATTGGCTTTGTACATAGTTATCATTACAAGTCT
AAAAAAATTCACTCTTTTCTTATTCAATGTCAATCCAAGAGAAAAGATTGTGGTAATGTT
GTAGGAGCATGTTTAATAAATTACTATAGCAAATTACTTTTTATTCCCAAGGTGTTTATC
TATAATAGTTAATATTTTAGTCGCTACATAAAATTTTACCAAAGAGTACTTGTATACTAA
TTCTAAATGCCTTCTGACATAAAACGCCTAGGAAAACAAACGCAAACAAGGCATCGACTT
TTTCAATAACCAACCAAAAAAATTTTACATTAGTCTTTTTTTAATGCTGAGAAAGTCTTT
GCTGATATGCCTTCCAACCAGCTTCTCTATATCTCTTGGCTTCGACAACAGGATTACGAC
CAGCTCCATAGACTCCACGACCAACAATGATGATATCGCTACCGCAGTTTACAATCACTT
CTTCAGGAGTACGATATTGCTGTCCCAGCCCGTCTCCTTTAACATCCAAGCCGATACCAG
GGGACATAGTTATGTAGTCGCTTTGAAGGTTAGGAAATCGACGACCAGCTATAAAGCCAA
AGCAAAAATCGGTATGCTTCTCAAACCATTCTAAGGTTTTCTCTGTGTAGGAACCAGTAG
CCAAAGAGCCTTTGGAAGACATTTCAGCCAAAAGCAAGAGACCACGTCCCAAAGGTAAAC
CAACTTCTTTGAGGCCTTGTATAATACCCTCGCCTGGCACTGTATGGCAATTTGTGATAT
GAGCCCAAGAAGCAATTTTGTACACACCAGATGCATATTGTAGCTTGACGGTATTTCCAA
TGTCTGCGAATTTGCGATCCTCAAAGATAAGAAAACGATGCTTTTTACCTAAGGCCACCA
GTTTTTCTACCATATCCTGGTCGAAATCCTCGACAACGTCAATATGTGTCTTGATAACAC
AGACATAGGGTCCAATTTTATCTACCAATTCTAAGATTTCGGATTTCTTCGTCAAATCGA
CCGCGACTGACAAGTTGCTTTGCTTTTCTTCCATCAAAGCCAACAATTCCTTGGCAATGG
GATTTTTCATCCCCTCAGCTCTAGCTGAATAGCTTTGAAATACTCTAGCATCCATAACTT
TGCTTTTAAACCTTTAATTTCGATCCAAGCAAAAAAGAGGTTCTTGGTAGGACAATACGG
TAAGAAAACACGACATGTGCAGAGATGCCGACGAAGCATAGTTAAACTGGGATGGTAAAA
TCAATTAAGAATTTATAAAGACAAAATTGTATAAGTCTCTAAAACATCTTAATTATACCT
CACAGAACTATCTAAAATATATTCACAAAGTGCAAACATTATCATGAAAAAGAACCATTT
TAATTTAAAGCAAGGGCATTAAGGCTTATTTACAGAATTTCTTACTTTTGTAAAGATTAT
AAGGCTGATTATCTTTTTCACCATGCCAAAAATTACACAAGATAGAATGGATGTTTGAAA
TTAAACGTGAGTATACAAACAAATACACTAGGTAAATCGAAACATTTTTTTCTCCATTAA
GTAACAAATTCCTATTTAGAGAAAGAATGCTGAGTAGATTAAATAATCTATACAAACTTT
TTTAACACAAATGCATACATATAGCCAGTGGGATTTGTAGCTAAGCTTCAGGAGTTTTAT
CCATTTAATGTATGGAATCAAAATTTAAAGCTTCTGTCAAAGTTTAACAATATTTCTTTT
GGTTTAAATCAAATCTTCCATGCGATTAAGAAGATAGATGCTGAACAAAAGAAGCACATG
GATAACCACAAAAGCAGTTTGCTCATGGGTACAACCATGAATTTTTTTTTCGACAATGAT
TCAAAGACCAGTATATCCAATACGCATCCTAGAATCTAGTCAAAGAAGAACCTAAAGTAG
AGATGCAAATGCGCTAAAAAGAGTGGATATAAATTCAATATCATTTATAAAACAACTTCT
TCCATTAAAAATTCCTTGGGCAAAACAAAAGTTCCAATCATAAAAAGTTAATAAGTTCTG
AGTTGTGTCAAATCTGACATGGCATTCCTCAATAATGACACTCACTCATTATGTAAGCAT
CGAAAACATATTAAAATCTATACAAGCTGTTTTGTCATTACGGTCTGGCATCAACTTTTT
TAGAGGCGGTACGAAGATGATTTTGCACACGGATAACCAATTCTTCATGAGATCCGCTAG
TTTTAAGTGAATTTTTTTTACAATACTCAATTAACTGTTTTTTTGACCATTGACTAGGAG
GACTTTGAGAAATGGAGGATGAAGCTGTCTCCCTGGAATTGTCTGTGATAGGACTAACTA
CAACCGCCAGGGAAGAAGCAGCAATAATTGCAGCAAACGATAAAGTTAAGACATTAGCTA
TTTTCATCGAAGATGAAATACAAATGAGTAAAAAGAACCCAAAAATGAAAACTGTTATTA
AAAAGGAGATTTTGAAAATTTAAAGGTTGAGGTAAAGAACGGTTGTAGAAGACGAGCATC
TAGAGGAAGACGCCCCCAACTGTGGCCAACGTTTTTCATTACCCAAATTCATCTGACATT
GATTATGATACATTGAAGGTGTGCTTACATCTTTCTAGTCATTATTTTGATACCACCACT
TAGAATATCCATTTCAACTTCTACCGATTTTCAATCGTGTTACGAAAACTTATTGTAATC
GATTCAACGTTTTACTTGACATTAATTTTTTAAGCATATCTACTTTCTTATAAAGAATTG
TACTAGTACTCAAACAATGAGTTGTTAAGATAATTGTGTATAAAATTTCATAAATCTAAA
CATATATCATCACAATGACAAAAAAAACTCAAATATGGAGTGCTTTATCTCCATCATTTC
AAACGCCCTTAAATAAGGAGCTTATCTTTTTGATTCTAAGTTTCGTTCATTAAAGGAAAA
AAACATTCCCATCAAAACAATTAGTACAACAGTTCATCAGATTTAAAGAGAGCTAAGGAC
CTTGTCAGCGGAGGAAATATCAACATCGGTGACCTCGTTCTCAATGAAAACCTTGACAAC
CTTGCCATTCTCGACAACAGCGGCATAACGCTTGGAGCGAAGAGGGCCCAAAAGACCGCT
AGCGTCGAAGCCAGCATCAAAGGCCTTGGTAAACTCTCCGTTCCAGTCGGCGACAAAGTG
AACACCACTTTGCTCACCACCGTCGAAAGACTTCTTCCAAGCCTTGGTGACGAAAACGTC
ATTTACGGCAACGACATAGATTCCGCTGATGCCCTTGGCAGCAAATTGCTTCTCATTTGC
AATATAGCCAGGAACTTGAGAAGAACAAGGAGGAGTGAAAGCGCCGGGAACACCGACAAT
GATGAATTTGCCTTGAGAAGGGAATTCAACAACCTCTTCGGGCTTGTTTTCCCAAAGAGT
AACTTTAGGCAAAGTAGATCCGACAGCAACCATTTTTAATAGTAGTAATAAATTTGTGTA
AAAGTTAAAGCAAGTGGTATAAAATCTTTAGGAGTAACGGCGTATTCAAAAAATGTCGTT
CAAGTTTAAAGATAGTATTATCAAGACAAATGGGCACATGTCGTTAATATATATACCTTT
CTACAAAAACGAATCTTTTGGTGACGTCAAATCACCAAATTTGTCGGGATGGAAGATTTT
TTTTCTTTACTGTTCTTCATCTTTGTATGAAGAGCTTTGTGGGCTGCGAGTGGTGGAAAA
TCCCAACCGGCACTGAGACCGCGCACAGCTGCGTTTTCAATGGTTCGTGCGATATTCGGT
ATTTGACTGTTGTAAAAAGGCAAGAAACGCTGAGACAAAGTGTTTACTAGACAGCCATTT
TTATTAAAAAGAAAAAGAAAATGGCAATAGAGAAGATTACGTTATCGGGTAGTATGCATG
CCCGGGTGTTAATTATTCCTTTGAAATTTTGAATTTTTAAGGTTTTAACGAAGTGATGAT
GTTTTTCTTGTTTAATTTTCACATCAATATCAGCAGTAACGTTAAGAAAAAAGTTTGATT
CATTTTCAAGGTTGTTTAATTGCTTTCAAGAAAGTCACTGTAGTTTCCCCTCTAAAATAG
GTGAGAAATTTTCATCAAATTCGATTCATCACTTCCTGCACCTCTCGGAACTGTAGATAC
CTTTTCAAAATTTATTGCTCACGATTTGCTTTGCGGTATCTATGAACAGATAAATGGCGC
AAACCCCGACGTGGTATAACGAACCGCAAATTTTTGAGTCCTCGAATTCATTTACGAATT
AGAAATGTTAACACAAAGACCACACTTGTGTTCGTCAAATCAATTTTCCGTGGTATTGCG
ACACAATTAGCCAGTGCTATGAATAGAGCGAGAAAGGTGGAAAAATTGACAAACGCGTCT
CACGCATCAATTGCTCGTCAAAATCTCTCTAAAAAATTTTAAAAAGAGTATTAAAATATA
TTGAAACGTTGTGAAAAATTTATTTTATAGCTAATACTCAAATATCACGATTTTACCGCT
TCTACCATCTGACTGGTAATTGATAAGTACGTATACAAACACATTCCACGTGTCTATTCA
GCAATTATTTAAGGTACAGTAAAGATGCAAAATATCGTACGTACTGCATCGCTATAAGTT
TTAACAAGGACTATTACATCACAAAAGACATTAATGGTAAGCTAAGTGTCTATGTTTATA
CGATTTACCGAACTAGAAGGTAGGATGAATTTGGGTTTCCTAAGAGTTATTATATACAAA
TACATCAGTGCAATAATAATGAAGTATATCAGTAGCAAAGGATGGATTTGGGAAAACGGA
TGTGGAATAGTGAATTTTCGAAAGTAATCCTTTTTCATTGTAGCTAACATTTTGTTCTTC
TCCCTTTCTCATGATGCAAGTAACGGAGTTAGATGTTTAGAATCTCATTTTCTTTTTCCA
AAGAACGATTAACGGAAAATTCAAAGGTTTTGTACGTTTAATCATTAATAAAAAAAAAAT
AATAATAATAATGATAATAATATAAACTATTACCTAGTAAAAAAATACATACGATAAGAA
TTGTAGTGAAATATGAAAATGAATTTTTTATTAATTTAGATTTTTTAAAGATTAAACTCA
TTGAATCATATTAAGCATAAAAAGACTGGTTTTTTTAATATTTCAATTTTTTTGCATAAA
TTTGTTTTACATAGATTTTTTAAATTGTATTTTTCTAGATATTAGTCCTATGGGATTGGA
AAGCCCAACATTAAATGGATAAAAATCATATGTCAAATACATTCCGATGGAATCTCATTT
GAATATTTGTTCAATACCAAATAACAAACAAATAGGGAGAATTAAAAATCAAAAATAGCT
TCTTGGTATTCATTAAAGTTTCAAGGTTTCATAGGTTATTAAGCCGATTTCCAAAAAAAA
AAAAAATTAGCTTTTCTAAATAAAAATTGTCGATCGCTCACCAGCATTTATAATCATGGC
TAGGATCTTTGCTTAATGTGTTTTGCATTTCAAGGATCCCCACATAAAGATTAATTGCAT
GTATACAACTGCTGCTAATCCTAGGCAAAGCGAAATGAAACCAACTGTGGTTATATTATA
AATCGCACCACCACAAATGGAGCCAAAAGTATTGGACAAAGACACTCCTACTTGTACGAC
TATGCTGGCGGTATTATGATGCCTTGGATGCAACTGTTTGGACGAAAGGGAAATTAGAGG
CGCAGATCCAATGCTATAGCCATAAATCATCAACGAATACAAGAAAAAATAAACTTGCAT
GGGTAGCTTGTGAACTGCATCTAATACTAGATGAATGGCTACTGCCAAAATTCCCAAGAA
TAGGCCTCCCAACATGATGTGTCGGTCTTCGAGCCATCGAGACAAAAATGAACTCGCTAG
AATAAAAGGTGCCACGATTAATGCGGATAATGCTATAAAATTTCCTGATTGAAAAGCATC
GTAATTATAAAGTTTTCCTGTGTAAATGGAAATACTAGCTTGGTAGCCGTTCACGGTAAA
GTATGCTATAAATGCCACTTCCGCTAAAAAGAAAAGCAAAAATTTATGTTTCCAACTCAA
CTTTGGCCTGTCCTCATCATCATTTTCTTTTTGTTGTGAAACTTTTTCGCTTTTGTCAGC
CGTTACCTCTTTGAAGAAGAATATGATAGTTAGCATATAAAAAAACCACATAAACAACAT
GACCCATGATGCCACTGTGTACTGATTCCAAACAGCGTTCTTTGAATGAATTGTCGCTTT
TGCTAATATACCTCCAAGGAAGGGACCTGCCATGAATCCTAAGGTCTGCGCTAAGATGTT
CATTGTTGCCAAGAATGTTCGACGATTTTGTCCGACGAGCAACTTATCTGTTGTATATTT
TTTGTGATATAAGAAGGTAGTGAACCCAATACCGTTCAGCATTCGCCCGATTAGAATTAG
ATAGATCCAATTGGCACGATATGCCATGCAATAAAGTAAATGGCCAAAAATGTGAGCAAA
CGAAGATACTACCATTGGTCGGAAGTACAGAGTATAACCGTTAGCCGACTTTGGGTTTGC
AAAGCAAAGCATGGGATAAAGAAATATTAACGAAATTAAAGTGGGAATCCCAATTACCAA
ACCTGAAAATGCATTTGTACCACCAAGGCTTTGAGTGTAAGAGGCCGACGTGGGTAAGGC
CACAGCCAAGGACATATCGGACATTAAGCTGTTAATCAATATGAACGCAATGGATACCTT
TGGGGGCAGTTTGTTGGCATTTTCGTCTACAGGATAAGTTGGAACAAGACTTGAACGATT
ACTCTGAAATGTTTCAGTAACCGACTCGACTTCTGATGCTTTCTTTGGATAGGTATAAAA
TTCATATTCTTCGGATACTTGGTCTACGAAACCAAGATCTTTAGAGGTGACCTTAAAATA
AGTCGGCCTACTGTCAACCCTTGATCGGCGACGACTAATACTACTAAAAGAGCCACTTCG
TTGTGATGGCTCCATTTGTGGAATACTCCTAGATAATCAAAAATTTTTTTGGTAGATAAG
CGATTCAAGGAGTTTTATGCCGATGAAGCCTATAGTATAGCTCGATAGCTTGATCCAGTA
ATTGAATCTTGCACGTGGCTATTAAGCTATGGTGCAAAACTAATTAGTATCTAATCTTTT
CGGACTGAAAGTTATTTTAGCTTACTTGTAGTAAGTGCACTGGAGTATCCGAAATTCGGT
GTTTGGATTTTTTCATTTTTTCACTAGTCGCTTATTTTAGTAACTTAGGCGACAAACATC
ATATAGTTTGTATTAGAAATGATAATTTTAATATTTTTGTTTTTGCCTTTTTTTTCCTTT
GTTTTTTTGCTAAAAGAACCCCAAATGTCTATAAAGAGTTTGGTTTGTCTGCAATGTTGG
ATATCAAACTTGAAAATAATTTAGACTATAGCATGCTTGTTATATTATATTGCTTTTCAT
TAGCGATGTAGTTAGTTAATTTACTTTGTTTCCTGTTAAATCTTTCGTCGTATATCTACA
ACTGGTATAGAGTCTCTGATTAAAGTTATACTATCTTTCTAGGCGACTAATACATAAACT
CTTTTACTTGATAAATTCAATTTTATAATTGTGATGAAAAGCTAAAGTTTTACTCCAAAT
TATATAAATAAATAATTTTTGTAAATTTGATAGATATTTTATGTATAGGTATAGATATAT
ATATACTAACAAGGGATTGTGATAATATTATATAAAAAGTCTATTACCTTTTGTATAGCT
TACAATATTGTAACAAATTAAGAAATAAATCATATAAAATAGGAATAATTTTTAGCGAAC
TCTTTGCATTAGAACGAATGAATTTTGTATATTGTATATTATTCATGAGACCCATCTAAT
ACTATTTTTTATATTAATTAAAAAAAAAAAAAAAAAAAANCCTGTTGAAATATGTATTTG
GCGCTAAACAATCTCTGAATACTAATAAAATTTTCGCTATAAATATTATCTTGTCATTGT
AATGTCATTTTTTTGGCTGTGGAAATATATCGTAAAAGTCATAACTTATCCAAAAGCTAT
CAAAAATGCAAAAAAATGCATCAAAGTTGATACTTAGAAAACGGCATAAACATGCCATCG
TCTTCATTCATAAAATTATCAGTAGGATCATTAGCAAACAAAAGCAATTGAGTTCGACAA
GGAGGGCAAAAGTGCGTTTTTAATGCCCGGAAATTGAATTCTTTATTCTAGTTAAAAAAA
TTACAACTGTAAAATGCGTTTAAGCAGTGTATTTACGCATACATGTATTCGTACACTCCA
TATATATCTATCTACATACATTCCTTTTCTTTCTTACCTTTATAAGGAATCATAACGTAA
TTAATGTATTCTAAAATTAATGAAGTGCGCTGCTTTGCCTTTTACAAACCACAAAATTGG
TTGATTATACTTATTTTTCATACCAAGATGTACTCTTTTTAACTATAATATATAATACTA
AGCATAAAAATTGTCATATAAAAAACGCCAAAAAAAGAAAATATTTTTAATAATTCGTGC
ATGTATCAAAGCAGTAAAAAGAGACACTGCTGACTTATAATTAGATTAATATCTTTAAAA
AAACGGAGTTTGTTAACGAAGGAATGCGATAGACTCGACAGAATTAAAAAGGGGCTCGTT
TTGTGCGCTGTGGTGAACAAAAAATATTAGAACCGCGTTTCATTCTTATTTAATTTTTTT
GTTATAAAATATCTATGAATTATTAAATGAATCCATTTGTCGTTTCTTTGTTGCTTTTTT
CATTCCGTTCGTTGATTATTTGCCAAACTCACTACCATTCAACTCATACTGTACCTATAC
GTAGCAACTACCTCATACTACTGACTTGAACGTCTTATATGCTTGTGGTGTTGCGTAGCC
TTTAATTTAGGTTTTTTACTTATTTCTTATATTATTAATTATCAGTCATTCAAGTTTTTT
CACTGTTTAGAGCACTTGCTTCTCATTTGCAACTTGTCATCCATATCTATCTAGCTACCT
CATTTATTCGACAGTTAAAACATCAGCCTAATCCTTCTACCTCCCTTCTTTTACTTTTCT
CATTTTTATCTCGTTTCAGCTTTTAACTGATTTGCTTACATCTGTATTTTGTAGCGTGCC
AAATGATTACAACACTTGCCATTGCTCTTTTCATTGCTGTGGTCGCCATCCATTCACATA
TACGAAGAAAAATATGCAAGGAAATTGGAATTCGACTTATCAAAAAGATAGCCCCTGTGA
AAGCTAGTTTATACAAACAAGTGGGCGTGGAGCCGAAACTAGCAAGAACCGTCGGGTTTT
TTCATCCTTACTGCAATGCTGGAGGCGGAGGTGAACGAGTATTATGGACAGCTGTCAAAT
CTGTCCAAACGGAGTTTCCAAATGTTATTTCTGTTGTGTATACTGGCGACAATGTTAGTA
AAGCCGAAATTCTGCGCAGAGTCAAGAATACATTTGAAATCGACCTGGATTCTTCCAAAA
TAGTTTTTGTTTATCTAAAACTTCGTTTCCTTGTGTCCGCCACTACTTGGCATCGGTTTA
CATTGCTTGGACAATCGCTAGGAAGTATGATTTTAGGTTTCGAAGCTATTTATCGATTTG
CACCTGACATTTTCATTGACACCATGGGATATGCTTTCACTTTTTGTGTCGTTAAAAGCT
TCCAAAATATTCCTGTCGGCGCGTACGTTCATTATCCCACGATTTCTACCGACATGCTAA
AGTCCTTAAAACAAGTATCTCTACTTGCTAAGGTTAAAATGGCTTACTGGAGATGGTTCG
CTCAGTTGTATTCAGATGCCGGATCTCATGCGGACTATGTGATGACTAACTCTTCATGGA
CGAGAAACCACATTGCATCTCTTTGGGGGAAAGATATTCAACTCTCCGTTGTTTTCCCCC
CCTGTAACACTTCAGAGCTTGAAAAGATCGACATTAACAGAAAGCGCGAACCCACTCTTC
TTTATCTTGCACAATACAGACCTGAAAAGAATCATGAAAATGTACTTCGTAGTTTTGCTC
TCTATTTTGAACAGCATCCTGATTCTCCAGCGAAGCTATTACTGGTCGGTAGCGTTCGAG
GTGAAGAAGACATGTGTTTTGTGAATCATTTGAAGACCCTTGCGACTGAACTCAACTTAC
AATCAAAAGTCAAATTTGTTGTAGATGCTCCTTGGCCCAAGGTAGTTGAGTATCTAGGTA
CTTGCTCTATAGGTGTCAATTACATGTGGAATGAGCATTTTGGGATTGGTGTCGTTGAAT
ACATGGCTGCTGGTTTAATACCTGTTGTCAACAATTCGGGTGGCCCAAAGTTCGATATCG
TGATTCCATGGATTGGAAAGCCTACAGGTTTTCATGCTAGCACCATTAGCGAATATGCTG
AAGCCTACCATAAAGCTCTTACATTGAGTCCTCAAGAGCAATTAGAGATGAGAATCAATG
CTCGTTCAGCTTGCGCTCGTTTTGGCGAACACGTTTTTATGCGCGATTTTGGAAATGTGT
TTGCCAAACTCCTTCGTGAAGATTACAGTCGTACCTAATATGTTGTTGTCTATACTGTTT
AATTCATGAAAGATGAGGCATTTTTTTTTAAATCCTTTCGTTTCTACTTATTTGTTAGGT
GTATCCTTATAAAGTTTATTACTGTTTTTGTTTATTAAACAGTTTACTTTCCCTTTTTTT
CGATGAATTTTTAATTCTTCATTACTTCTTCTCACATAATAAATAACAGTTTGGGGCATT
AACGTTGTCAATTACAGGCTCTTAATCACCTCTTACGATGTGTATTATTAAATGAGAAGC
CCTCATTCATTGTCTCTTTCTTACTGCTTTTAATGCTGTTGTACCAGGTTGGTACTTATT
TCTTAATTTAATTGATTCGCTCTTTTGATATTCAAGTAATTCATATCAAATATTCTTGAA
TAAGGAAATTTGAAAATTATAATTTTCTCATAAAAAATACAGCATAAAATCAGGCTAGGC
CGGTACGAAGTTAAGTGCTGACAATATTGTGAAAAGCGAAACTTAAACAAGTACTATAAT
GCCATTGTAAAACTAATCTCCATACTAACTAGTTTACCGTTAAGTTCGTTGTCGATAAAT
TTTTACTGAATGGAAATGGTCTTCAGCTAAGAATGCTAACATTATTTTCTGGTAATAAAC
CTTGACAAACTTGACAACGTAGGTAGGCATTCAAAGAAAATCATAATAATCGAGAACACA
TTATTATCACAATCAATTAACAATGAGAAATTAATGGTATACTAGTTGTTTAAGGAAAAG
CTCACATTCCTATTACCTATTCATTCCAAAGTTCGCGAAAAGGCTATAAAAGGCAATTAA
ATAGGCTATACCTCCAAAAGAATACGTCTAGCAATAGTTTTTGAATAGGAGAATACGGTA
AATGGGTTCTAGGTCTGAAAAATTAATGCACGAAGTTTTTGAACTTCTATACTAATTTTT
TATTCATCCCATGAAATTCATTGAATGCTATTTGATATGAGTTTACATAAGTGCGTTGTA
TACCATTAAGGAAATGCAATACGGTATACGCTAAGTTTGAGAAACTTTTTGTCGTGATAA
ATAGAATCATTTTAAGTATATATCTTCAGGCAATGATGAGACCTCAGTTCTTTATAAAAT
AATCAATCTCGATTGCATTTAATTGTTAACCATTCAATTGCAAAAACTATAGCGAAAGCT
AGTAATGTCGTTAAGTTTCGTTAAATCAAATCGTATTGTTAAGTAAGTGAAGGAATTTTG
TTCCAAAAGCAAAACACCGCTTCTTTTTTAAGAAGAAAATATAGGGGAGATTATAATCAA
GAAATTGATTTTTTCCGAGTTGAATTCAACGGAATGTCTCTTAAAGTTCAAAATCCGAAT
AATGTACGGGTTTACACAGTTTCTGGTGAAGGCGTAACCCAACGCTTACCTAATTGGATT
AGTAAAAGGAAATTGAAGAAAGATTATGCTTTGTCTCATAGGATTGAACTTTTACAAGAT
TTTGAATACCCTGAGGCTAGTAATCGCATCAAATGCACTCGAGACGGCAAATATGCAATG
GCAACTGGTGTGTACAAACCTCACATCAAGGTTTTTGACTTTGCAGAAATGTCTTTGAAG
TTTGAAAGACACACAGATGCTGAAAATGTTCAGTTTGAGATTCTATCAGATGACTGGACC
AAAAGTGTTCATTTACAAACTGATCGAACGGTCGATTTTCACAGTCAGGGCGGAATTCAT
TATTCTACTCGAATTCCTAAATATGGAAGAGATTTGAAGTACCACTATCCCAATTGTGAT
TTATACCTTGCGGCTGCTGGCGATGAAGTTTATCGGTTGAATTTAGAACAGGGTCGATTT
TTAAATCCTCTCAAAATTGAAAGCGCCCAAATTGACAGTCCGACTGGTGGTGTTAATGTA
ATAGATATAAATCCTATGCACCAATTGTTGGCTTTTGGGACAGATGCTGGCAGTGTCGAA
TTTTGGGATCCTCGTGATCGCTCTAGAGTTGGAATACTTGAAATTCCTAGCACTGTACCT
TCTACTCCTTATTCCGACAATTCTCGTTCTGTAACAGCTTTAAAATATAGGAACGATGGA
CTTAATGTTGCGATTGGCCTTTCAGATGGTGCCACCCTGTTATATGATTTACGTTCTTCA
AGTCCTTACATGAGCAAAGACCAGGGTTACAGCATGCCCATTAAATCTCTTCACTGGATG
GATAGTGCATTAGATGGAACTGCGAGGGTACTTTCTGCTGACTCTAAAATCATTAAGATT
TGGGAAAAGGATACAGGGAAGCCTTTTAGCTCTATTGAACCTACGGTTGAGTTGAACGAT
GTTTGTCCCATTGAGGGTACTGGTTTAATTCTTACAGCTAATGAAGGTTCTCCTATGCAC
GCATTCTATATTCCATCGTTAAATCCTGCTCCCCGTTGGTGTTCCTTCCTCGATAATATT
ACAGAAGAAATGGAAGAAAATCCCGCGCCTACTATTTATGATGATTATAAGTTCGTAACT
AAGAAAGAACTCCTTAATCTCGGTTTAGATCATCTTGTTGGAACAGGTGTTATTCGTGCT
TACATGCATGGTTTCTTTATTGATAATAATCTGTATGAAAAGGCAAGACTGATTGCTAAT
CCCTTCTCTTATGAGGAACATCGTCAAAAAATTGTCAAAGAACGTCTGGAGAAGCAACGT
GCAAGCAAGATTCGTTCTCAGAATCGTCCAAAAGTCAATGCTGGATTGGCATCTCGATTA
TCTTATCAAGAGAACAAGTTGCGTAAGAAAACTGGCGTTACGGACGGACCTAGCATCCTT
GAAGACGAACGTTTCAAAAATGTATTCACAGATAAAGAATTTGAAGTGGATGAAGATACT
TTGGAATATAAGCAATTACATCCTTCTAGGTCTGAAGCAAGGGGCCTTACTGCTGCGGAA
GAGTCCGAAGAAGAAAAGGAACATACCAAGGGTATTAAGTTTAGTTCTGATGAGGAGTCA
CTGTCTGATATGGAGGAAGAAAATGAAACCTTCGATGCACTTGTTGACAGAAGAAAGACG
GAGCAGCAGGTCAGCAATGAAAAGACACCTCAAGAAACCATTCGTAGTACTCCCTCTGGT
ATGGAAATGACATTCAAGGTTGAAAAGAAAAAGAAGTCTAAACCTGTTAATCGAGACGAG
GATTCAACGTCTGGCAAAAAGAAACAAGTTACTCAAGGTCGACGTTCAGCTAGCAAAAAC
GTTTTCCGAAACATGTAACCAAAGCACGGTAGAACTGTCAAATTTGTGTTTACCACTACT
TGGCGGATATAGAAACATTTGCAGGCGTGCATACATTATCTGTCACTTTTCATAAAAAAT
TTCTGTGTTGTATACATCTTCATTTAGCTTTATTTTTGGTTTAGCAAGTTGGTATTTGGG
TTTCGCATACGATGGATTCGTGTGCTCAAAAAATTAATTTCGGTTTTTAATAGGTAAGCA
ATAAGCAATTTAATGAAATATCTACTTTATGTATCTATCATTGTTTTATGATTACTTCTT
GTTGCAATCTGGCAGTAGTAGATTAGTCGCCCAAAATTTCAAGTTTTGTTTATTTATTTA
TTTAGAAGCAGGTTCGTTTTTTATATGTAAACTAAATTTGGCTGAATTGAAAACATTGTC
AACAAATTATATATATCTTAGCTGTGGTAATGTAAAGAATCTGGTAATCCACTTCGTATT
GCAACATCTACTTTTCTCGCCAGTATACCAACCACACTGCAACCTCATGCTATTGAATAT
AGTCTAATTTCTCTAAGACAGTAAAGCAAGTTTTAAAAGTCATATGTTTTTGATCTTTTT
TAAAGAAGTTTCTGTTTTTTGAATTATTTTGAAGAAAATTATTTGTATGTAAGTTTGTGA
TCGATGGATAGTCATCATATGATGGAAAGATCGTTAACCTTTGAAAGAAACTATTCTCAT
TTATTTATAATAATATTTATAATAAGAGATATGAGCAGCTCGAACTCCCGAGTGCATGAG
GAACAGCCTCCAACAGAAAATCGCAGATATGCGAGACCTACTGCACAAATGAATCGAGTA
ATTGAACAACAACCAAGGCGTCGCGATTACTTCCAAAACAATGACAACTCTGGTCGCAGA
GGTTATAATAGGCATGAAAACAATGGTAATGCGCAGGATGTGGTACGTTCACACTATAAC
GCGCGTCCTGATTTGGGTTATAAAAAACGACAATTTTCTCCTATTATTCAACTAAAGAGG
TTTAACAACTGGATCAAATCTGTTCTCATACAAAAATTCGCACCCCATGCTTCTGATTAT
CCTATTTTGGTACTAGACATGGGATGTGGAAAAGGTGGTGATTTAATTAAATGGGACAAA
GCTGGCATTGATGGATATATTGGGATTGACATAGCTGAAGTTTCCGTAAATCAGGCCAAG
AAGAGATACCGTGAAATGCATGCTTCTTTTGATGCACTATTCTACGCTGGCGACTGTTTT
TCTAGCTCAATTAACGAATTACTTCCCCCAGACCAAAGAAAATTTGACGTTGTTTCTCTA
CAGTTTTGCATGCATTATGCATTTGAAAGCGAAGAAAAGGTTAGGGTCTTGTTGGGGAAC
GTTTCTAAATGCCTTCCTCGTGGTGGAGTAATGATAGGAACGATTCCCAATTCCGATGTA
ATTGTCAAACATATTAAAATGCTTAAACCAGGAGAAAAAGAATGGGGAAATGACATATAC
AAAGTCAGATTTCCTGAATCACCTCCACGCTCTTTTCGACCTCCGTATGGAATTCAATAT
TATTTTTATTTAGAGGATGCTGTTACCGATGTTCCTGAATATGTAGTTCCTTTTGAAGCC
TTTCGTGCTGTTGCCGAAGGATACAATCTTGAATTAATATGGGTAAAACCTTTTTTGGAC
ATCTTAAATGAAGAGAAAAACTCTGAAACGTATGGACCCCTAATGGATCGAATGAAAGTC
GTTGATAATGAAGGACACCGTGGAATTGGTGGACAGGAAAAAGAAGCAGCAGGATTTTAT
TTAGCATTTGCCTTTGAGAAGAGGGGAATTTAGTCTTTTCTTTCCTTATCCCACTGATTC
ACTGTGCAGACCGCATTGTAGAAAGATCTTTCACGCTCGAAAGATCAGTACAGTGGTAGA
AAAAAAGATGACTTTAAAAGATGTAGATTAATTTTTGATGGCAATGACTTTTATTTATTT
ATTCATTTTTATGCCTTTATTCTTTCTTTTTCTGTTTTCATATATTTTATACATAAGTAA
CATGCTCTCTTTCATTCCAGCTTAAGCGAATAAATAAAGTATGCTCCCAGGCATATTTCA
TCAAATCAGATTGCCCCAAAAATTGCCTCAAATATTAAGCGATAGCTTAAATCAATGCAC
CTGTCGGTATTCAACTACCAGCATCCACTGCTACTCTTCTTCCATTTTTTCTTCAGCAAC
AGTCAAGTTAAAAAACTGGAACGTTTTAATTGATTTGAGAGAAAATTTCTTATGGAGTAA
TCGATTGATTAAATGATAAATTCACATTGCGCCCTTTTTTAGTCTCGATTGATTAAATGA
GTCATCTGCTTTTCGCGTATTACCTTTGCAACGACATTCGCTCATTCCAAAATCTACTGA
AGCAAGATGATTCAAAGGTGAAAGAGCCTAGAAAGGGTTTTTCGGAAAAGAGCGGACAAA
AACTCCGTATCAACCAAAAAGATCGATACGGACGCACCGTGCTGCACATCGCCGTTTCTG
AGAATAAAAATTCCTTTGTTAGATCTCTTTTGCAGCATAAAGGCATTGATGTTTTTGTGC
AAGATGAAGAATCTGGATATACGGCGTTGCATCGGGCAATCTACGTTGGCAACTTGGAAG
CAGCGTCTTTGCTTTTATCAAAAGATCCCTCCTTCAGATCATTGCGTATTAAAGACAAAG
AAGGTCTTTCTCCATTTCAATTTTTATCACGAGTCCTTTCAAGCACTATTCATCCGGTTC
TTGACTTACCGATAATAGGAAATGAACTTTATGGCTTTGGTACTAACGTAAACAATACGC
TCGGAATAGCAAATGGGAAAGAACCTTCATCGCCAGAAAGAGTGTTTTTACTGAAAAACC
AAACAGAGTCTCCCACATCAGGTCAACTCTTTTCCCGAGACAAAATCCTTGATGTGCAGG
CTTCCAAATTTCACAGCGTCGTACTAACGGATGAGCCGTCGCAAAATGTTTACGTATGTG
GTATTGGTGCTGGAGGGAGAATAGGTTTTAACACGGACGTTCAATATAACTTTATTCCTA
TTCCTGGTATCATTCATAAAGTTATCCAGATTTCTGTTAGTCATACCCATTCACTTGCTC
TTACAAAGTTCGGAAGTATTTATTCGTGGGGAAAGAATGGTTCTGGTGAACTGGGACTTT
CTAATGACGAACTGAAAAAGGATGATCCAATTCAAATTACCCCTAGGCGTATCTCTGCAT
TCAAGGATTATCAGATAATTGGAATGGCGGCTGGAAAAAGTTATAGCGTTGCTTGGACTG
ACACTGATATTTACAGCTGGGGGTTAAATAATGGCCAATTAGGTATATCTGATCATATTT
CAGTTGTTTCTACTCCAAGGAGAGTTGCTGGCTTATTATCGCCTGTCATACATGCCGTTT
GTACTACTCGTGCTACGATATGCCTTTTACAAAACAACAGTATAATTGCCTTTTGCAATT
ATAATCAAGTGAAATTGCCATTCAACGTTGACTTTGGTAGTTCGTTAAAGGTAACTAAGC
ATCCTCTTTCCCTCACCAGATTTAACGTTAGAAAATTATTAGCTTCAGAAAACAAACTAG
CCGTGCTTACAGAACTAGGCGAAGTCTATGAATTTGATATGAAGCTTTTACTTGATCGTG
ATTCTACCTCTTCCAAGAATTCCACACGAACTTCATTCAAATTTACTCCATTATGGATTT
TTGAATCTTCAGACCTTGCAGCTTTAGATATTGCGTGGACCGCTGATAATTCTTTAATAC
TATGTACTAGAAATGGCACTTGTTGGAAACGGGAGTTAAGGTCAAAAAAGCGAGAAAAGT
CATCTAGTAGCCCGTATTCTAGAGGACCATACAAATATAATAGAATTGAAAATTTACAAA
TGGTTGTTGGAGTCCGTGCGAGCGCTTCTGGATCATTTTTTGCAATTCGAAATGATTATC
TTCCACCGCCAATCTACAAGCCTTCGAATATGTTAATTGATCTTTTGCGCTCACTACTTC
CCTATGACCACCTTTTACATGTAAGACAACCACGTTTGATTCCTCCCGAAGATGAAGACG
GAGTCCCTATTTTTGACGAAGACCGCGCTGCATCCAGCAATGAGATGCAGCTACTTTTTG
AAGGATCTATACCGATTCTTACTAGTTATGAAAATTATAAGCAATCATTTTCTGATGTTA
CTATTTATTGTGGTACTTCTATGTTCCACTCACATAAGTTCATATTGTGTGCTCGATCTT
CATTTTTGAGAAAATTATTGCTACAAAAAAAGAAATCGAGTGTCTCCAACATCATTTACA
TTGAAGAAATCACTCAATCTCATTCAACAATTAGAGTTGAAGATATTCCTCCTTTAGCGG
TTGCTATTCTTTTGCATTATTTGTACACGGATACATTGCTTTCTCCATGGCATCTTGATT
CACGCTTTTCACCTTTAAAAGAAAACCTTTCAAAACTTGCAAACTTACTGGAGTTACCTC
ATTTAGCGGAGGTTTTACCGTTTAGTGTTTCCCGCCAACCTTTGCTTTCTTTAACGAATG
ACATTCTGCAACTATATAATAATTTTTATGTCTTATGCGAAGAAACAATGGATACAGTAA
TAAAGCTTAAAGATGGAGAGCTCAAGGCACATGGTCTTTTTTTAAGTCTCCGCAGTGAAT
ACTTTAGTTCTTATTTCCAATTTGTTTCTATGGAAAGCAATAGTTTTGACATCCCAATAA
CCGTCAATTTGTCTCATTTGACTGTTGAGCATATGTCAATTGTTCTTCGTCATGTATACA
GTGACTTAAAAGTTGAGCTTTTTGACGATTTGAAAGAATCCGATTTTCATAATTGGTTGG
AAACTATGTTCGAAATTTTGTCTATTGCAGACGAGCTTCTTTTTCTTGAACTAAAAAGCA
TAGCCCAGCAATCCTTACTTCGCTTTTTAAATTTGAAAACTCTACCTACTCTAATGGATC
TTTCACTTAGTTATCACGCTGAGGAGCTTTATTCACGATGTATTGATTATGCTTGTCACA
ATATTGAATTCTTTTTGGAAGCAAATCGTATAAGTGAATGGGATGGTTTCCATTTAAAAA
AAGTCGCTCAACGTTTAACTGAATTGCTTTCTGATCAACGAGTACATCTTCCTTCTAGCA
AGATTGCTAATAGATTATTGATAAGAGATCCAGTGTTGATGGAAAAAAGAAATTATGAGC
TTAAAGTTCTCAGAGAATACTTGTTTTCCCAGGAAAGTTCTCAATTATGGGACGATTCCC
CTTATCGGTCTATTTTTGAAGATCGTCGATGCAGCACTTCAGCAGTAATTTTAGAATCTG
GAATTGTTCCTTCAAGTAATCAAAGTGATTCATTAAATAAGGAAGATGCTGAGGAGAAGT
CTCCTAAACCAAATGTTGTTAACGTTACGAGCATTACAAAGACAGCAGGAGCTTCTGTTG
AAATTCAAAACAATATAGAGTCTGCTTCGTCAGGAGGGGATAAAACACAATTAAATGGTC
CTGGGGCTGATCAACCTGTTACTGCAACAATTACTTTTGACAAAACGAGTCCATGGAGGA
ATAGGGAAAATCTTTCTCATAATAACAACACTACTAGAGCTAGTCTTAGAGAATTGCTGG
AGCAAGAGAAAGCTGATGCTTCAACTACTACGGTTTTGTCTGATTCTAGATTTATGAAAG
CTCCAACTAAAAAATCCCAACGTGAGAAAAAAAAGGAGCTTTCAAAGCAAGTGCCTATTT
CCAAAACAAATGTTGGCCACATCGATATCGAGTTGGGTAAATCGAATCACTCAAACCCTT
GGTCTGTAGCAACACATCAGAGGGGCAGTTTTTCGTCATCAACTGGAGTGAAAAAGTCAT
TTAATGGTATTCTTAGAGAGGCAGCTCGAGAGGAAGGTTCATCTCAAGTAATTTATCAAG
AATCGAAGAAGCGCATTTCCAATGGTTCTCCAACTAGTTGGAACCTACTTACTAAACCAT
CTCCCCGATCTGCTTCTTTACCAAAAAATAGCCAACCTTTATCGATTTCGGAGATTATGA
CTGAGCAGAAAGAAGAAATTGAGAGTCAAAAGAGGAGATCATCTTTTAGAAAAACAATTG
AGGAGATACAACAGGAAGAGGAGTTTCAAAAGTGGTGGGAGGAGGAGAGTTTGAGAGTAC
AGAAAGAACTTGGAATCCTTAAAACTGAAAGAGATACCTCTACGAATAGAAAACAGGGAC
AAGCTTCTAAACAACCTCAACGAAGGCACAGAAAGGAAAAAGATTCCAAAGTGTCAGAGT
CCACTGCGGAGTTTAAATCTCTTCCTATTGATATACCAAGGACTACTCACAAGAAAGGAA
AAGCACGTGCAGTCAAATGACCATAACAACGACTATATACAAAAAATTCAGGACATTAAT
TTATTCAACTTATGAAGAGATACTTTAATAGATATGTATAAGAAAAAATATTTGCTACAT
GGTGAATTATTTATTAAGCTTTTGTTTCACGATACCAATCACACATTTTACATACGCTAA
AAATTCAATATTTGAAAATAATAAAATTGAATAGGAAACTTTGGTCATAAAGAAATTCAA
AGCACGTACGGAATGAATACAAGAATTCGATATACACGGTAATTTATAGTGTATCAAGGA
CAGATCCAATTGTAGTGGAAAAATTATAGGAGAAATGATGCTGCTTCGTAAATTCACTAG
AGAAACCGTGACAAGCAATTACAAAACGAGCAAAGATAAGGTTTGTTTCCATTCACCTAA
ATCATCGCAAAATAGCCAGAGGTCAAAACGGAAAGGGCAAGAACAGCATAACCGGTACGA
TAGACACCCTTTAGACTTAACTCCTTGGTGGTATCCCAGATCAAGTGACGAATACCGTTA
AAAATGTGGAAAGTCAAAGGATAAGAAATAACAAACTTAGCAGGAACTTTGATCCAGGTG
GGAACTTGCTGAATAAGACCAGAAATGGTAGCTGTATCCAAAGAGTATCCAGCGAGAGGA
GCCACCAAGTAGCCCATAGCGAAAGCATAAAGAGTACCGGCGACAACACAACCAGTGATA
CGATGTAAACTGGATAGATACCAAGTCAATTGAGGTTCATAGATAGTCAAATGAGGAGAA
TTTGGACGGTGAACACGCTGGGAAGCAAGACGAGAATTAGCCTCCGTCTGGGTCAAATGT
TCGGTTGCAATAGAGCGTCTCCAAACATTTCGTAAAGTAGAGCGGCCAGCAGGGCGCAAC
AGTTGAGCAGCCGGACGGAATAAAGAAGAGCTTAGGCAGAATGAGCGAGTTGCGAACATG
GTCAAATTGGGTCGCAAAAAAAAAGGGGGATAATTCAAATTTTTAAAAGAATACTTATTC
AATAGTTGTACAGTGTAAAAAATGGATGCAGACACAAGTTTTCAACTGATTAATTATATG
TGTACTGCAACAAATGGTATTGGTAGCTAGAGGAATTGCGCAGTATGTTATTGGAAGATA
TTTTCCGCTTAGCAATTCGCTCGCTGTAGGCAATAATGTTAAAAGGCCGGAGTTCGAATT
ATAGAAACCGACCAATTTTATATTTTGATAAAAACCATTTTCTTTTAATAATTTGGAAAT
TTTGTCGAGAGGCATTCACAATAAAGATTTTCTGCATTTTTTGAAGACAGCTATTGTATT
AAAAAACTGATTGGAAAGTGGAAAAGGTATATTAATATTTTGGCAAAGGATTTCATTTAC
TAGGTAAAAATTTGTCGCCTCAATTTAACAGTACTTTTTGCAGGGAAAAAGGGTATAAAG
ATAATTTACGGAAAAGTTAATAGATAAAAAGACTTAAAGAATGTCCTTTTCAGAAGATCA
AGCAATGGAAGAAGCCAAACTGAGAAATGATGAAACTGAAGAGCAGGATCCAGTGGTGCG
GACATATCCGGTATTTTTCTCACCCGGACTTAGAAATAATCTTTTACTAAATCAATTTCC
CCTTCGTCCTAAAAACCGCACATACAGTGATGCAAATGGTGAAGCACCAATCGATGTTCG
AGTGAAACCGAAGACTGGCTGGATGGAGGTCGATGTACCCATTCCTACAACAAAATACTA
TAATGAGGATAAGGCAATGAAATATGGTAACGGCAAAAAGCCAATTCAGACCCAAACACT
TTCTGGAAGACTTCAGAAACCAAGGACCAATTTGATGGTCGGTCTAATTCGCGACGGGCA
ATTTCATATTGTGCCGTTGCGCGGTTTAACGCAGCTGAGGCCCTCAATGAAACATGTAAA
TGAATATACACAAAAGTTAAAGGCTGCTGCTGGCCCTTCAAATTCTTCGTCTGGTACGTC
TACCCCACGTGGACCCATTCGCGCAGTGCAGGTTACTGCCAAACAAAATACAGAAGCACC
AAAAGTCTCCACCACTCACATAGTTAGAGCAACAGAGGAGGAGGAATGGGTTGAGTTGGA
CTGTCGCCCAGAACGCGAGTCCGAGTCAATATTGAAGCAATTAGAATGTCCCATCGAACA
TCAACCAAACGAGTGCGCTGCTGTTGATGAAGATTACTCCTTTATTTAGTTTAATCAATG
CGTTTATGTATATATTTCTTCACGTAAAAACTGCTTTTAGTCATTGCAAAACAGATAAAA
TTGACATGACTCTCATTAATTGCTATACAAGAGTAAGTCGTATTTACTTACAGATGCTAA
CATGATGACTGAAAATATTGACGAAATTAATATCAACCATTTTTATTGCTATATGCAATT
TGCTTAATCAATACTGTACCACTTTAAACACTGCCTGCTACAATAGTGCATAACTTCTAT
TTCACTTGGTATACAAACAAAAAAAAAACTCTACTTGTACAAGTATAGACTCCAATGATT
AAACCAAAGCATCGAAACATCTCATTTATTTTTAACTAACGACGAGCAGCAACCTTGGCA
TTCTTAATAGCTTGGCCACGAGCAGAGCTGGCAGCAGACTTGGCCTTGATGGCCTTCTTT
TCAGATTCGGAGGCGGCCCTCTTATCCTTACGTTGCTTCAAAGCAGCGGCACGGGCAGCA
GCACGGACTTCAGGACGTTGGTTACGCTTCTCTTTAATGACATCCAAGTTAGCACCGACA
ATTCCACGTTGGTGCTTGACGGTACGACGAGTACGCTTCTTAGCATGCTCCTCAGAGATA
CCCTTCTTGTGCATACGACGGTAAAGGACAGTCCATGACAAACGACGGGGGTTCTTGCGT
TGAAGGAAAAGGCTCTCAGACTTCTTGTTGACAAAGCGGAAAACCTTGTTGTCTCCACGA
ACAAAGAGTCTTCCAGCTCCGGGATAAACCTTGGATCCAGAAAATGAGCAAACTTCCACC
TTCATTTTTCCTAGTAGTTCGTGGTCGATTCCTCTAAACTTTCGTGTATCGTGTTGTGTC
GTATTTCAAAAAATAGTCACAAACCCTAACCTCATATTTTAACTACGGACGGACTCGTTA
ATGGATTTAAGACTCACTTCCTGTTCAATTTTTATTTACGCCTTAATTTGGTAAAAGGGC
TAAATGCGTTAGTGACTCGGTGGAGTACAATGCGTTTATTTTAAATAGCAGAACCTGGCA
GCTGCTGCAATATTTGTATAATACAAATATAATGATCCCGTACTAGTAATAAAAACCTGG
TTTTAAGTACATTTGTAACTGAAATGCAAGTTTACTAGGTTTAAAACATTCTTTATTAAA
AGAATAATAAAAGTTAGAATTATCGCAAACTTACTTGTCAAAGCAGTGATTCGGTGGGAT
TTAATGAATTGTGAAACGTAGCGCTTGCTGTTTGTTATTTATTGGTCTAGGGTATTTTTC
AAAGATTAAGTAAAAGGAATTAATTTTTTGTCCAGCATTCAATTCTATATACCTTTCCTA
ACGCAAAATGTTGCTTCATTATACGCAAACAATCAATTGCGAGATAGGCTCATTTCCATA
ATTTAGCAGCATGTAAGCATCACGAAAAGTAAGAGCAGTTAAATAACGGTTTTTATTTGA
TCAAAAAGATGATAATTATGATTACTGTGATAAGAAATGGGCATAACGCTCAATGTCTAC
GTTTCCTCCACTTATAATGATACCAATTCGTTTATTCTTTAGCTTTTCCTTCATAGCGCG
CGCTGCCGCAAAGCTAAGACATCCAGTGGGTTCGACTACAATTTTCATACGTGCGGCATA
AAACTTAAGACAGTCAATTAGTTCCTCGTCGGACACAGTCAATATATCATCGACCTTTTC
TTTTATAATGGAAAACGTGTAGTTACCCAAATGTTGAGTTTGAGCACCATCGGCTATAGT
TTTTGGTGTATCAATATGTACGATAGATCCTTTCCTAAAGGACTGTTGCCCATCGTTTCC
AGCTTCAGGTTCAACTCCATAAACTTCGCAGTTTGGAGCAAAATGGCGAGCAGCAAGTGC
TGATCCAGAAAGCAAGCCACCGCCTCCGAGACAAACAAAAAGTGCATCAAGAGGGCCAAC
CTCTTCAAACAGTTCCTTAGCTGCGGTTCCTTGACCAGCAAGTACATGGGGGTGATCGTA
AGGAGGGATAATGGTAAGACCTTCTCTTTCAGAAATTTCTTTGGCCATCTTTTCTCTATC
ATCTTTGTATCTATCATACATGATTACTTGACCACCATAGCCTTTCGTGGCAGCGACCTT
GGCTTCGGGTGCATCGAGTGGCATAATGATTTTTGCTGGAATTCCCAAGATCTTTGCCGA
CAGTGCAATGGCCTGAGCATGATTACCAGAAGAAAACGTCAAAACACCAGCTTTACGTTG
AGCTTCATTGAGTTGAGAAAGAGCATTAAGGGCACCGCGAAATTTGAAAGCACCCATTTT
TTGGAAATTTTCACATTTAAAAAACACTTCTGCCACAAACTCTTTATTTACTGTGCTCGA
CGTGAGTACTGGGGTTTTGTTGGCGAATTTCTTAATTCGCTCACTAGCTGAAGCAACATC
ATCATAGGTAGGAAGCACCAGGTTATCGCTCATTGTCGTAGTTTTTTAAAAATTTAAAAA
GAGTGAAAATATCCTTTTATTCTGTAAACTATTCAGTCTTAAAATGCAAACTGAAGAATT
TAACGACAATGAGAGATGTCAAATCAAGCAGAGCTCTCGATCATTTATAGAGAGAACCGT
CAACTGTAACGCTATCTTATCTTTACTATGAAAAGAAGGTCAAAAAATGCGAGCCCAACT
CGGAAACGAATTTATAGGCGACAATTGTAAAGACACTTACACAATTAGAACCAAATGGAA
ATGAAACAGCAGGACGGAGCTCCAACTTGCTAGTTCATAAAACAGTGACATGTAGCATAG
CGAGTATAATGCTAATCACTATTTGTAGTATTCCTCTGTAATAAATGTTAACATTATATA
GTGAGAATTTCAAGATGTAGAAACAGTCTGTTAAGAGTGTCATAGAATATAACGAAAATG
CATGTATAACAATTGTTTCGACTCATTGAGTGCCAGAATAGTAACGTCTTTCTACCTTTA
GCGTGATGAACAGTCATGCAGCATTGGTTAAATATATCAATAGTTTGAACCAAGCCTCGT
TAATTTCTGTAAACTGTATCTGCTCAGCAATGGACTTGACTGCAGCTTAAATCAGTTTAG
AAATAAATATCCAACAAACGGTGTTTTGACTTTCACATTACTATGCATATAACTCGTTAC
TAAAGAGTTCTTTTTTTTTATGAGAAATCTTAATCAAGAATGAAAAAGCTGATAATTAAT
GCTAAAACAATCGCAGAATTATATAATCCGTCATGGTCCAGTGGCTAGGATTCATCGCTC
TCACCGATGCGGCGGGGGTTCGATTCCCCCTGACGGAGATTTTTTATCGTGTACTTTTCT
AAATTGATTGAGAAATACGATAATTTATTATCAACTACAATTGTTAATTCACTTTTCGGT
CCTTTTCTTTTGGTGTTACTCTACTTACTGAATTCTTTTCTTTTCTTGTTAGTTAGCACT
GTCTCCTTCTGAAGCGTTAATATTGTAAGTATTCTATAACTAGTATTGAATAGTTCACTG
TATATCGTTATTCGGTAAACAAACAGTGGACACATTGAAAAGAATAAAAAACAGATACTA
AATATACTTTTAAGCCTGTGGTATTGGGATGATATAGAATATTCTGTTTGTTTTCCTTTT
ATTTATTTTGTTGAGAACGATACATGTCGTTTTTTTTAATAACATTTGTAGAATCGAAGT
GGGTTCGTATGCTAAATAAATTCGTTCATAATTTCCATGTAAATAATCTTTGAAACACCC
TTTGAGTATTCATAAATAACAACGGGAATCAGAGCCTCCTTCTTAGTTTGAAAGAAAGGA
AGATAATAGCAGGCTGTGTTAAGACTCAGTAAACATGGTGTTACCTCAAAATGTAAACAA
CAACGCTCCTACTTCTGGACGAACTTGTCAAAAGCCAACATCAGCGTTTTTTTACGAAAT
AATGTCAGATTCAAAGTTGGCAGATTCTTTGAATTGCCTTTCTGTGTCAACTCCATCAAC
CACAGCTAATCCTGGGAGACAACAGCTTTTACGACTTGCAGTATCAAACCAACGACAAGT
AAATAATGTTAGTCTAGCAAATGGGAAGGAAAACAAACGGACTTCAAATAGCAAGTTCAA
TTCTTCCCTTCGTAAGATAGAAGAGCCAATTGCTGGAGTACCTTCATCAGCTGGTCCTCA
ATGGCGAGAATTTCATATTGGAATGTTTGAAATTGGAAAACCCTTAGGGAAAGGAAAGTT
TGGAAGGGTATATCTAGCTAAAGAGAAGAAGACCGGGTTTATTGTGGCTCTCAAAACATT
GCATAAGTCTGAACTTGTCCAGTCAAAGATAGAAAAGCAAGTTCGACGAGAAATTGAGAT
TCAATCAAATCTTCGCCATAAAAACATTTTACGGCTATATGGGCACTTTCATGATGAAAA
AAGGATTTATTTGATTTTAGAGTTTGCTGGCAGGGGTGAGTTGTATCAACACTTGCGTCG
TGCAAAACGATTCTCAGAAGAAGTTGCGTCTAAATATATCTTCCAAATGGCTAACGCCTT
ATCCTACTTGCATAAGAAGCATGTAATACACCGTGATATCAAACCTGAGAACATTTTATT
AGGAATTGATGGAGAAATCAAGCTTTCTGACTTTGGTTGGAGTGTCCATGCACCTTCTAA
CCGTCGTACCACTTTATGTGGTACATTAGATTACTTACCACCTGAAATGGTGGAGGGAAA
AGAGCATACCGAAAAAGTTGATCTCTGGTCGTTGGGTGTCTTAACTTATGAGTTTTTGGT
GGGAGCACCGCCTTTTGAGGACATGTCTGGTCATTCAGCTACGTATAAGCGTATCGCCAA
AGTTGACTTAAAAATTCCAAGCTTTGTTCCTCCTGATGCACGGGATCTTATTTCTCGTCT
ATTACAGCATAATCCTGAAAAAAGAATGAGTTTGGAACAAGTTATGAGGCACCCTTGGAT
TGTAAAATATAAAGATTCATGGACTCGCAAAAGTTCTGAATCTTCCTAACCGCCATCTTG
GTACTTTTTATTTAATTTTTCCTTCTTCTCACTACATTTTTGCATTACTACTTTCTTTTT
GTTTCAGCGCTCTTTTTAATCGCGCAGCTCACTATATTCCTTCAGAACTTTTTTGATCTT
TGGGGGTTATGGAGGTTTAATTATATGTAATATAACACACTCATTTAATAGAGGATCACC
ACCATAAACTAATCGTTTTCCAGATTTTCTTTTCGAAATCACTTAGAAGACATTCATTTT
CCTAATAAAAACTATTTAAAAATTTATCATCACTTTAGCCAAGCTAATAATAACTTCCAA
AAAAACTGTTACAATATGTATAAAGATAAAGTACGCCAAGCACATAATAAGTTGCATAAC
AAGTGAGAAGTATGCTTCGATATTTTTTAAAAGCCAACGTAAATGCTGTACGGGATATTA
TAAAATGGGAGGGGAAGGGAGTTGACATAATAACTATCTGACTTTTGTAAACTGGTATTT
CAATAGACTAGACGAAAGAATGAATAGTTAGTACGAAGAAAAAAATGAATGAACAAAACT
ACAGCGAACGTACTTTTTTCAAAAGGCCTGAAATCGTTGAAACAGGAATTGAACACTTCT
TCAACGATTGCTTCTGCTTGCTCTTTGCTTTTACAATTCGGGTTACCTTGTACGGAGATA
GTAGCTCGTCGTTTGACGCATTCTTGATGATGCTTCCGAAAAGTTTTAATGTTACCAAAA
CGAAGTTCTTTGGTCCAGCGACACTCACCACTCATACTACTAGCACGAATTTCTGAACAA
GCCTGATGTCTCAAATTGTTCCAATCGACTTCAAACCTGTGGTCGTCAAACATGTGTATC
ATTTCATGGGCAATTGTATTCTCTGCCATTTTTTTAGTATAAAGTCTGTTTTCACACAGA
ACTATCCCTTTACCGGGAATGTAACCTCCAGTACTTTGTGCATCACAAGGCTGGCAAGAA
ATGTCTTTAGCTTCAATGTTGCAATTCAAACGATCCAAGGCAGTTTTTAAAAAAATAATT
ACTGGAGATTGGGACATTAAAGCGCGCTTTACGCGCTCACAATTTTTCCTCTCTTTCGAC
CAACTTTGTGGATCTTCGCTCATATCTAAATGCACGTTTCCTTAATTCTTATAAAAAGGC
CTTCAAAGGAGTTTATGGAGACAACAAACGATATCTCTAATAAATGTCAATTAATAAATT
TTACCTGTACAACATTAGGTGGTTGAGTAGCAATTCGCATGAACAGGCGAAACCCCGAAA
ATAGTGATCGACAGAGGGAAAACACTAGTGAAGTTCTTCGTAAATATATAAGAAAGATTA
CACCCTTTCCGAGCCCATGGACTGCAAAGTGAGGGAGTATCGACTTTTTTTCCTATTCAC
AGTCTGCTGAACCCTGCTATGTGTATCAGATTGCAAGCTCTTTCACATAAAACAGTACAA
CGCAAAAGTTTTGCAGTTTATAACGTTATTTAACGTAGTTAAGAGAAATTGTACTCGTTA
TACGTTATAGCGTAAAATAATTTGCGCTTTGTGTTATACGGTAGCTTACACTTCGAATGA
AGCAGTAAACGTTTCTTTCTGTTCTTTACCTAAAACAAAAAAATCTTAAAAAAGGGTCTT
TTTTATAGATACTGAAACAATGAGGCCTTTAACTCATGAAGAGACAAAGACTTTCTTTGA
AAAATTGGCTCAGTAGTAAGTTCATTGCACTATTTCATTGTGTTTGGAATATTTCATTCC
ATCGAGTTTCTTATAAAGTGTTGGGATTACTTTTTACTTCTAATACTCTACAAGAAATAT
TTATGTTATTTTCTACGTTGTAATTGCGTTACTGACTAGTAAAACTAGCATTGGAAAAAA
TATTACTCATTTAATAGACCGTCCGGATGATCCTCATTGCTTTCGTTTACAAAAAGATCG
TGTTTATTATGTTAGGTAAGATTTTTGAATATGGCCACCATTCATTCTACCCCTAATATC
AAAAATTACGCTAAAAAATGACCTTTTCAATTGAAACAAATATTTTAGCGCAAATAAAGT
GCAGGACGGAGTGATTCTTTTTTTTTATTTAGTTCAATCAAGTTAACATACTTATAGTGA
ACGTGCAATGAAAATGGCTACATCTGTAGCTCGCCAAAATCTGATGTCGTTGGGTATTTG
CTTTGGCAAGTTTACCAAGACAAACAAATTTCGCTTGCATATTACTGCTTTAGATTACAT
AGCCCAATACGCTCGCTATAAAATTTGGGTTAAAAGTAATGGTGAAATGCCGTTCCTCTA
TGGCAATCATGTTTTGAAGGCACACGTGGGTCGAATCACAGATGACACTCCTCAACATCA
AGGTGTCGTTATTTATTCCATGAATGACACTCCTTTAGGTTTTGGTGTAACTGCTCGCTC
TACTCTTGAATTGCGACGCCTTGAGCCTACAGCTATTGTTGCTTTCCATCAAGCAGATGT
TGGTGAATATCTTCGTGATGAAGATACTCTTTTTTAGAGTACGAACGGAAAACATTGCTT
AAAAAATATAATTAGCCTTGCTTTCACGTACATTCTCCTTTTTTGATTTTGTAGAGTGTG
CAGGAAGAATAAGGTCTCTGGTTCGCGGCGAATCTTATCTTTTTGAATTTGGTGCTCTTT
TTTTTTAAATAAAAAAAGAGACTTTATGCTTAAACAAAAGTAGTTCCATTTACATACTTT
TGTAAGGTTAAAGAGGTTTTGGGCTTAACTGCAACCGTATTGGTTTGGCATTTTGGGTTG
TGTGGTTTTTCTAGTTTCAAAAAAATATAATATGAGCTTATCTAAAGGGAAATTTTATTA
TTATGGCAAATGCGCCGGCAATAAATAACCATCTTTTTTTCATTGCCTCGAGCATTAAAA
ATTAAAACAATTAACTAGTAGCTTGAAATTGAAATGAAATTATGTACCGGTGTGCGAGCA
AAATCTTTATTTATATGATTTAAGTCTAATTGATTTTATTACTTTATGCAAGTATTTTTC
GTCCTCTAAAAATAGCCTAGCATCTTTCGACTTTTGCTTCGGATGTATAAGAGAAGTTGA
CTCGGTATAACCTGCTGTTAAAATCGTATTCAGTATTAAAGAAAAATACTGAATTAAACT
AGATGGTTTATACTAAAAATACAGCTTGTAATTACTATCATAAAATCACACTCTCTTCAG
TTGGTTCCTTTGTTTTATTATAGCTCGTGTAATCTTTATGCAACAGCCATACAAAAATTT
TGCAAAACATCAAACGAAGAAAGGATTAATTTGAGAAATTGAAGCGAGATAACGAAGTAA
TGTGACTAGGTCATGAGTAAGGACGCTATAAGAATTTAAGTGAGCATTTTCATGAGAATG
ACTTAAGCACAATATCTACATATCTAAAAACTTTTTTTTTGACATAGAGAAAAAGGTTAC
ATCATTAATTTGAAGCTCACAAAATAATATTTTAAAGATCTATCAACAATTATGCAACAC
CACCTTGCATGCTTTTTCCCTTCGACTTTATCTTGACATTGGTGCGATCCCGTTTAGGAA
TCCAGCGTTGAGGGTCTGGAGTAGCCTTAGGATTGAAGCTTTTAGGGGTGGGTTTTCTTC
TCTTCCGAGTCTTTTTACTAGAATTTGACGAATTCGCTTCTACAGAACGCTTAATAGGCC
CTATAGCTGCCGAAACAGGAACACCTCTAATTTCAATGTCGTCCACGTCAATTCCTGTAA
TTAAATCTTTAGTGGGTACAAGGTATTTATCCATACCAGATTCAATTTCCTTATCCAGAT
AGCAAAGAGCAGCAACTTTACAAGAAACTAATTCGCTTATTGGGCCCTTCCATTGAAGTA
AATCATCAATTACACTCATATCATCTTGAATAGTACTCACTGGAGCTCTTTCATCAAGGT
GAGCTAGAAGAGACCGAGTACAAAGAAGAAGTTTAGCTTCACACGACTGTTGCTTTCTCC
AGTAGTTAGCAGCCTCATGTAGTAATTGGGATTTAAAACCTGTTGATTGAATCTTATAGT
GTAATGCATCGCCTAATCCAACCAAGCCCGGAGAATATAAAACCGATAAACTTTGAGACG
CTTCCAAACTTGTGCGGAGCTTTTGATAGATAGATAGTGCACCACGAAAGTTTCCATTAG
AAATTTTGTGTTGCATTAATAGCAAGGCAACAACAATGTTATCCGAGTCACTTTTAAAGA
GATTTTCCAAGTAGCCGGGGAGTTTTTTAGGAGATATTAGAGATTTAGTTTCTTCCCTAA
GCAGAATAGTAGAAAAATAAATACTTTCTTCTGGATTTCTTTTCTTCTCTTTTCTCACTG
AACGCTGCTTTCCCACAGCCATGTCCAGCAAGGCCAAATTTCGAATAAATTGCTTTTTTT
GTGAAGCAAGTAGACTTGACAAGGCTTTCTCCAAATTTGTTCCGTGAAGGTCACGAAAGG
ATATATATGGATTATCAATACTCATGCTAATTAAATTATTTACGAAGATTGCCTGAGAAG
TTTCGTCTAGACTGTTTATCAAAATTAGTAAAGATCATTCAAAAACTGTTGTCATACCAA
TCTTTGGAAATTTTGAGAGACTCTTTGGAGGCTTTTTCATTATCACCAGCTTGTAAATAG
GCGAAAAAGAGTTGTAATCGACAAAGGTTAATCTGAGACTTATGATCTTCAGAGTTGGAA
TCAGAATTTTCAAGCTTTTCAAGAGAAGACGAAAGTAACTCAATTGCCTGGTTCCAATCA
CCAATAGTTAAGTAGCGCGTAGCAAGGTTAAAGACAGAATCCTGGTCATCCAAAGATACA
GCATTATTTAACTGCAATCCAGGAAGCTGTGAAGCAGCAGCAAGCATATTCACTCGAATA
TCAGCGCGTTGCTCAGGCTAGTTAAAAGTTAGATAAAAAATAAAAATTGGTTTTCAACTT
AAACATACCAAATCATTTTCAAGGTGTTCGTAAATTTTGAGTGCCTTCGAGAAGTCGGAC
AAACGATAAGCCTTCAATAAGTTGTTAGTAAGAACAGTTTTTATTAAAATAATAAAGAGC
CGTATAGAATTACAACAAGTAATCATCGCTTTCATCACCAAAATCGAAGTCTTTTTACAT
GGCTATTCAAATACATTTGAGACATACCTTCTGAGCTTGTAAGTGTTGAAGAAATTGTTT
GTCTTCAAGAGAAAAATCTTCCTTTCCTAACTGAAATGCACAATATGCGCGTTCGTAAAC
CGCATCGGTTTCGCCGAGGTATTTTTCTATTATCTTCAATGCATGCTCATATCGTTCAAT
ATCAATCAAATTCAAAACTTTCTGATATATATCACTTTTTGTATCCCCAACTTCAATTTT
TCCAATACGCTGAGCAAGTTCCTCAATCTCCTCTTCGTGGTTGCTCATCTCGTTGTGGTT
TGCTGTGGGCAAGTCAGCTTGAACTATTAACATAGAGTAAATCTGAGTGTTTCCAAAGCT
TTAGGTCTTTAAAACTTATTTTAAATTTAAATAAGATCCTTAAAACAAATTTAATCCCTA
ACCGGAGCGATATTGTTCAAGCTATACAGATGCTTCTATCCTACAATCGTTCGCAATGCG
GTCCCAGTAAATAATTTCATAAAAAGATAGCAAAAAATTTTGAAGGATTATACGAAAGCT
AAATAGTACTGAGTGATTTTATAAAGACTGGAGACCGATTCAGTGCGTTCCAAAATTCCT
TTTGGGACAATATCAAAAATTATCTATTTACTAAAGCGTTTTATGAAACAAGAGAAGAAA
GTAACAGATACACATTAAATATTAATATTCTGAATGATTTTGAGCTGGATAAGTCATTTT
GACCTACACGCTAGTTGTTTTGCAACGTGTTTTTAGACAAAATAGACTCATTTCGGATAT
CGTGATAACTAATATAAGAAAAAAGAAAAAGTGAAAGATTTTGTACTATCTAAAAAAAAA
GCTGTTATACAGATAAATTAGATAGAGGACGAAATAGTAAATATGTTACGAGAGAGCATC
ATAAAAACCAAAAGAAAATAAATGAGTAGCACTTACAGAGACACGAATGACGAACAGTTT
TTCAATTAGTGCTGGGAGATTTGGAGAAAGGAGCGATTATATTATTGAAAAATTTTTATA
GATCAGGTATATATTTGAATAAAAACTTGAAGTTAATGCTCATTGAACCATAAATAGTGT
GTAAGCAGTAGAATATTTAATATTTTCCCACTAATAAATACAAAGGATAATCATGTGGAT
ACGTCCAAAAATTATTAATATATGGAAATCTTCGTAGGTAGGAATTCTTATTTTTGATGC
TTAGCCATACGCCAAATGATTTCACGATGAAAAAATAAAACTTTAATATCATCGTTGGAA
AATTAGGTAGTCCAAATTTGACAGTGAAATCAGCTGTGAATCATTTATAACATTAAAAAT
CTTGAAAGAAATTAATACGTTCAGCACAAGATTCGCTTGTACATCCTGGGCATCGTTGGG
TAAATTGACGAGAATAGGGTACTTTAGCCTTTAAATGCTCTGCAACCAGGTCAGCCATTC
CTTGAATAGCTGTCATACTTCCATTAATGCTTGAAACACGTTTAACTCCGGTAATTCCCT
TTTGCTTTGCATCTTCAATGTAATCTTCTAACTCCTTCAGAGTCTCAATGTGATCAGAAG
TAAAAGCAATAGGAACGAGAATCATATTCTTCTGTCCTCGGTTACCCAACTGCTCAATTA
CAAAGTCTGTTGCAGGAGACATCCAAGGCAAAGGTCCAACCTTTGATTGCCAAGCGTTCA
CAAATTTATTCTTGTAATTTAAACGTTTCATAACGGCTTGGCTAGTAGCAGCAATCTCAT
AAACATAAGGATCACCTTTCGCTACTTGACTCATTGGTAATGAATGAGCACTAAAAACTA
TAACAACATCATCACGAACATCTTCAGGATATGTCTTCAATGTTTCCTCAATGTTTTCAG
CAAATGCATTAATGAGACCTTGTTGCAAAGGCCAACGGTCTACAATTGACCATTCGAAAT
CTTTTTCCATTCCCTTTTCAATAAGTTTTCTTCGTAATTCATTGAGAGAAGCACCACTCG
TGGCACAAGACCATTGAGGATATTGACTGAATGCGACAGCGCGCGAAACATTTGCTTTCT
TTAATTCATCTAACATATCTTCAGTCAAAGGAGGAGCATAACGAAAGGCTACAAATGGAA
GATGTGGGGCGGACTCTGGACATTTTTTATCAAGGATTTTGCACATTTCCGACCCCTGTA
TACGAGTCCAATGTAAAATTGGACTTCCTCCACCAATGTCGGAATAGTGATTTTGAACTT
TAGGTGTCCTACGTTTCGCAATGAATTTTCCTAATGAATTTTGAAAATAACCGAGAGGAA
TAATATCACCATCAGTGAATAGACGCTCCAAAAAGGGGCCCACCTGAAAACATTAGTTCT
CGTGTTGATAGTAATTATAAATGAATATAAAAACAACAAAAGTTGAAGCGTTTTTCAGGC
TGTACTCCATACAAACGCTTCTTCAATTAAAGTCTTACCTCATCTAAATTGGAAGGCCCA
CCCATGTTCATCATGACAACAGCCTGCACACCTCTGTTAGTAATATAATAATTAAAAATC
AATAATAACATACTGTAGGTCCTTTACCAGAAACGCTCTTAGTAACGCCATTCGGTGGAC
TTTCATCCATAACGGTGGAAGAAGCATCAGAACTATAAGACGAGACCGACATTCTATTAA
CAGAAAATTTGGAAAATGTGTTGTTAAAATAATTTCCAAGCCGAGAAGTATGGTTCAATA
CGGGAGCAGTTCTTTTTAGTGCAAAACATGATGGGCAAAATCGAATCATTTTGGCATGAG
TAGTCGACCGACAAAAATCGTAAGAGGTTCGTTTTTAACACAAAAAAATCAAAAATTTAA
GATTGCAAACAGAAGAAATCCTTACGAGCCTTTAATACAACAATAAACAATACTAAAATA
TATGGTCACCGGTTGGTTCTTTTTAATATATAGTAGCTGTAGTAAGTCATCAGCGCTAAA
ATAAGCTTATATTTAAGCGACTTTTTCATTACTGCTAACACTGGTAGTTAGTATTAGTTT
TCAACAAAAAGGTCTTAATGCAACTGATTCGCGTTACTCGTATTATAGCTGTATAAGTAC
TACAATAGGTTGCATTAAATTAGTTCAGAAGGTAATTGCAAACACTAAGTACTTGCTACA
AAACAACTTGGTCATTTAATTTTCATCATTTTATAACTGGAATTGCACATAGGAGTACGA
GTGCGAGTACAAGCACAACATTCATTCTTGAATGCCTTCTACAAGAATGCGTTATATGAA
CTCACTTACATTCAATGATTAGAACTCTCCGAAATGTTATTGAAAATGAAGGTATACGTC
TCATTAGCCCTAAAAAACCCAATATTAAATCCATAGTCCAACATTAAATGCTTGCTAAAA
ATAACAGAAAGAAAAGTGCGCATACACATCGCGCAGAAATTAAAATAGAATAAAATGGGA
GTCTTGAAAAAGAGGAAGTCAAGAAATGGCAAAGAACTATCAGGATTTACGACTTTCTGA
CAAAGACATTCTTAACTGAAAGATAAGCATCGTAAATCCTTTCTTTGACTTCATTATCAT
GGTGAGCAACGACAATGTCGTTTTTCTTATTAAGTTCGTCGTTCGACGATACAAGAGAAG
GAGGGCGGCGGACTGTTCCAACACCATCAACGCCCTGCCCCTTTTTAAGCCAAGGCTTGA
TGGACTCACGAGTAGCGTCAACGAACACGTGGTATACAAACAAACCCAATATAATTAAGA
CGAAGGCAATGGGGTACAGCCAGTACACATGATATCCAAACACATGAATACCAATAACCA
AGCTCCAAAAATCGGAAGTCAATAAAGAGATATTATAAAAAGTCGCAGAAGACATTCTAA
AGAGAATAGGAGCCAAACTATAAAGCAAGAACATGACGAGAATAAAACCAGCTAAGTAAC
CACCCATTTCACTAGTCCAATGCAGGGTATACAAATGGTGACGGTCAAAAATAAAGGTTT
GAATAATGCTGATAATAGAACCGTAGAGACTTAATTGACCGATGACTACGTAAAGCGGCA
ATTTGGAAGCAAAGTATTCCTCCAAAGTATTGGACACACCATAACACGTAGCGCCGATAA
TCATGTAACCATCACCCAAACCAGGGTTGACAGCAGAATAATCACCACGAGAAATCACAT
CACTAACGACCAGCAAAACCAAACCACCAATGCAAGCCACGACACCAAGAATTTGAGACC
AGTGATAGCGAACCTTTAAAAAGATAAAGGAAAGAATTACAACTGCCACAGTAGCCCAAG
AATCGAGTAAACTTGCACTAAGCATGTTTGTGTATTGGTAGGCTAGTACAACGAAATAAT
TTCCTTCAACGTCAAAAAAGGCAAAGATGATATATTTCCAACCGTGACGAAATATCATTT
CAAAATACTTTTTAAATCCCATACGAAAAACAGTGTATGGTGTGTACACAAGAGTTAGCA
AAGCGTAAACCAAGAATGTTTGAAAGGCAGGAATATTACTGATGCCAGACATGTATCCAT
TGAATGTGTTGGTCGCAGTAATGCACAGAGAGAGAACCTGACCAAGGAAAAACACAATCC
AAAATCTTTTATCTAGTAGAAAATAAAGGGGTTTTGCCTTTGGAGTTGACTCCACCTCTT
CCTCGGCGGCTGGTACTTGAGAAGCAGGAAGGCCAATATCATGTTCAAACGGTGGTGGCT
CAATGGGATGAGAATCAATATTTACGTCTAGTTTTTTGTCGATAGAGGGTCTCTCACTCT
TGATTTCTGAACCATTAGAGCTTTGCCCCTGAATGAATGCGCTACCATACTCAGAATCGG
CGGCAGCAATTGAGGAATTATGAGTGTAATGACTTTTATCGAAGTCAGAAGTACTGCTTT
CCTGGTATGACTCTACAATACCTAGCGGGTCTTGTGAAGTTTGAATTTCTTCATTCAAAC
TACTGGAGTTATCGTGCTGGCCCTCGTGACTTTGCACTGGCACGTGTATCGAACCGTCAA
CCATTCCTATCTACAGATCACTTTTCAGTAAAGTCACTGTTTATGGAATGTTGTTTCAAG
AAAGAAAAAATTGAAAAAACAATAAAAAAGTGAGAAGGAGAGTTCAACATCGCATGGAAA
ACCTCTTTCAGTGCTGTAACCTGGCGTGACTGCCCAAGTAACAATGTGAGATATAACCAT
GAGTAAAGTTAAACGAATGTATAACATGCAAAAATTAACAAAGCTGAAGCGAAAGCGAAG
GCTTTTAGAGCTAAATGCTTGTACATTCATCGTTTCCAAATGCAGTAGTAAATTAATAGT
AAAAGCTCGACTTTTGAAATTAATACCTGAGTTGGCTTGCTATTCTTTGTAGGGGGGCCG
ATTTTACCCAACATGTGCTAATTTTAGTGAAGAGAGAAATCTTCCAGCTTCTAGATGAAA
TGAAATAAAAAAGCGAGTAAGAGAGAAGAAATGTGTTGCTTTTTTTTATTACAGCACTAA
GAGAAATTCAATGAAGATGGGATGAATGTTATGGACTAGTATTAAATATAAGAATCTCGA
CGCTAAAAAAATACTGTTTGTTAGAATACGTAAAAAGACTTTGTATAAATAACTTAGGGA
AAACTAGCTTGATTTATGTAGTATTCTATCCCTCTTGTAGAAGTGTGTAAGACATAAATA
TTTAAATTAATGGGAATCGATATTTTGGGGTTCATCCCAAATGAGCCGGTAACGTAGAAA
ACGAATCAAGATACTAAACTTGTAAACACATGTATAAACAATTAAAACAGCTAAGCATGT
ATCACGAGTATTAACGATTTGGTAAATGTTAAGACAGTTTATTATGTCCGGTCCTCCTGT
TTGCTGCTACGAATATTCAAGAATAAAGAAGCAAATGTCAATATGATAAGTGAATGTTTC
TCTAGAAAAGATAGAAAATAACTAAGCCACTTGTTATCAGACATACAGTACGTGAACATA
ATCAAGCGTATGACTGAACTATGATTTTGGTACCTCCCTTCCACAGCATAAGCTTCTCCA
AGATTGTTTAACTTTTTAGAAATTAGCTCCGATTCAGTTGGTTAAATCTAGGCTCTTTAG
TTTGTCTTTTAAGCAACTCATATACAGCTTATAATATCAATTTATTATAGACATATCAAT
AACACTTATTGCTCAAGTATTTACAAGCCATCAAAATTAACGCATCCTTAAATCTGTAAC
AAACTGCGTAACTGCAAGCTAACATACTGTAATTTAACGATCAAGCTCTTATGTAGACTT
TACGTCGTTCCGAACTCATTAAGCTTGCTAGGGGTTTTAACGAAATTGCGTTATGTCATT
CTGTGTAATAAAATTGTCACCACCATTCCTGAGATCACTCATCTATCATAGCAGTCAAAA
GCATGCAGATGATCCATTGGGATATTAGAAATTGCCAAGCCTTCCAGTTCATTTCCATAC
GAGGCAAATGAGGAGAAACGAGACTTTTCTTCTCTAATATTGATCTATTCAAGAGCAATT
TAGTCACAAGTTCTGATCATCTGTTCGTACTTGAATATGTAAACATTACAATAAACGGAA
CCAAAAGTCAAAGCATGCAAAGCGAAGTGAATTTAAACAGTTCATTCCTTATTAAAAGAA
CTGCTTGTCCATATTTTTTGACAAGAATATGCTTCTTTTAAGATAGACAGCAAATAGGCG
GTTTTAAGGTTGATGCAAACATAAATCATGTTACAGCAACTACTTTTAAGGCGTAAAGTT
TACCTTCATAGTTGACAGTAAATTATTTTTATCTTTCTATTTTTGAAAGCAAATTCGTAA
GGAGAATAATAATAGTATTATAAACACCACTTGATCGCAGTGCTGCGTCTAGAGTGTTGA
TTAAAATATGACTCAATTGCTTCGACACCTCCATAGGACTACTTTTACTCAATAATCTGT
AATCATCGAGTATATTTAAAGTAAGAGAATAGCCTCCATCCCCGCTTTCCAAAAACGTAT
ACATATAAAGTGCATCGCATACGCTTGAAATTAACTTTTGATTCAGAAATCTTCTCGTGT
CTAATCCTTTGTCCTAAAAAGCCTAATTTCGTGTATCTTATACTGCGAAGCAATACAGAA
GATATTTTCTGGAAATAATTGACTCTTTTCCCTTCCAATCCATATACGAGGAATTTTTGA
CATTAAATTCCACTTTTAGAACCATTCTATTCTTTCTCTTTCCTTGCTACCACCATCCAT
TTCTAGTCATTCAGTTCAGGTTTTTTAGTAAACCTTCTTGTTAATTGGTTATAACATCGC
TCTTTCATTGCTTAAAAGAGTAACTTTTTAAATCACCGTACCTTCCTTGCAAAGTTAACC
TGTATACATCCTTCTGTGAACCCGCAACAGACCATTTTATTTTTTTAAATAAAGCATAGT
CTCAAGTTCCCTAACATTTGATTAAATACCGATTGCCGATTAAAGCATTCCGACATTTTT
GTTTTCATCAGATTATTCAAGTAACGAGTTAAGTATTTTTTACCTCGTTCACACATTGAC
TGCCTTTTTCTTTTTTGCATTACTTTTTTGACAATCTCGATAATCTTTTATTAATCCAGC
CTTCATTTTCAATTCCTTTTTTTTTTTGAAATTCAAATTCTCGTTGACTCCTCACATCGA
CGACATAAGCAAATTCCGTTCTCTCACTAGGCCTATTGACCGATTTGAGCATTTTAAACA
AGCATTGTTTGTCTATCTCTTTTTTGACTTCTGCATACCTCAGTCTTGTTACCTTGAACG
TTATATTTTCTCTGTTTTTTTATCGAGGTAAACAAACAAAAAAAAACATATTTTATAGTA
TCCAATCAAAAAAAACCACTTTTTTTAATTTTTCATCTACAAACAATAAATAACTTTCAA
ACGAAAGAATTTACTGTTTAATATTCTGTTGATTCCTTAACTTCTTGGAGGATCTATTTA
TAAAACTGCTGCCTGCGACGATTCAAATCGAGGTGTTCCCAATCAATTTGTAAAACAGGT
GTTTTCTTTAATACTTTTGGTTCTATTTTGCATTTTCTGTTTCTAGTACCGCCACGTTCA
TTTATTAATTATCCCTAATTGAATAATGAGTCAACTTTATGCTTTAAACGGACAACCTCT
AGCAGGGAAATCTGATGACCTGGCAAATAAACTTGCCGCCTTCGGATTGTCTCAACCTAA
CCATAGTTCTCTTTCAGAACAACAATCGACCAACTCTTTGCTTCATGGTTCAGGAGCATT
TAATAAACCCCCACTGTCCAGGAATTCAACGACAAATCCGCTTAATTTATTATATACACA
AACACAGCAACCTGCAAGGTCGACAACTCCTTTTCTGCTTAACCCAGTAGGATCAAGTCC
TGGTAAATTGCCCGTGCCTTCAAGGAACAACTCTTACTTACAGGGCACTGCGGAGTCAAA
CTCCGGTAATTTTGCAAATAATTCAATTAGCAATAATTGCTGGAATTCCGCATACAATTC
TAACAGTTTCGAAGGCACAGGCAGCTCTCCAAATTTTCCACCCCAAAATCAATTTCTTTC
AGATAGTCGATCTTCAATTGCAACGCTAAATGCCATCCCTTCGTTGGATCAAAGTGTTCT
ATTGAATCCAAATCTTCGGGCTAGAACACCTAGCTTGGTACCGGAACATTACTTTGATGA
TACCGACAAATCAGTACATTCTAAAAGTAGTTCTGGATCTAACTCCCTTAGTGAAGCTTC
AAATGATGATTTAGAATCTTCTATCATTCAAATTGTTGGTGGCTTGCCGGACGATTTTGA
TGATAGAGAGCTGAGTGGAATTTTCACATTCTGCGAAGGATATGATTTTTCAAAAATCGA
AAGTGAAAATGGGCACCGAAAAGCTATTGTATACTTTCGGAACGCAATAGCTGCATTAAA
GGCAAAAAACATGTTAAACGCGTCTTCTACAAACAATTTCACCATTATTCAAAGGGATGT
TGTAAGGCAACAAGAAAATGAATATCACAAGGGCATTCCACCATTGACTACCCCAAGTTT
ATATTCCCAACGCCTGTCAAATAACTATGACTCAACAACGCCTGGGTTTCCTCGGTTTTC
ACCAGCAAATTTTGATTCTGTCATCAATAAGGACGTTACTTCAGAATCACGAATGTCCAC
CTCGTATCCAGCGGTATTGGAAGCTTTTAAATCGTTCAACCCAATAAAGGCTCCTAAAGC
TGAATATCTTAATCAATCACGAGCATCAATGGGAAACCCTTCACCTTCAAACTGGAATAA
TAGGCTATTACAGCCATCTTCTAAAGAGCAAGCCGTATATTCTTTCCAAACGCAGAAAAA
TAGCAAAGGGCTTCAATTTACAAGCAATGAATTAACAAACCCCACAGCCAAATATTCACA
GTTGCCAAACAATATTGCTAATATTGGTGAATCTAATTCTTTATCAAATCAGCCGAATAA
CTTTGCACAAACGTCGTTCGATTACCAACCTAATCATCCAAATGCAATTTCGCCCAAAGC
AAAGTTTTCTTTACCTTCAAGACCAAGTTATCATAAAGACAACTCTTTTATTTCAAAACA
AGCTATCGATAAATCAAATCCTTTTGAAGAGGCATTGCGATTAGAACGTACGAGCCCTGT
TAAAGAGCTACCTGCTATAAGACCACGTACAATTCCACTGAATGGTGTTGCCCCATATGA
AAGTGAACTTAGGCCGCCGCCCAAGTGGAAGCCTATGCCAGACCTTAAAGTAGTCCGTTC
ACGCCCGTCATTAAAACAACGCCCTTTAAGGAGCGCCGAATATGTCCGTGTTTGTGAATT
AAAATGCCTTCAGGAAGAAGAATTTGATAATAAAGTGCTATTGGAACAAGTAGAGTCCAA
TGTGCAAACTGATCATAACTCACCCTGTAACACAATTTATGTGGGAAATTTGTCCAACCC
AGACCAAGAGAAAAAGCTTAGGTTGGCTTTTTCAAAAGAGAAGGGGTATCGGAGACTATG
TTTCAAAATTAAGGGAAACAGTCCTATGTGTTTTGTAGAATTTGAGGAAGTTTGCCATGC
TGCGAAAGCAATGGAAAAAATGCAAGGTGCTGCATTAGACGATAAAATTAAAGGTGGCAT
TCGCTTAAGCTATTCCAAAAATCCACTTGGTGTCCGCTCCACCGAAAACCTTTCAACCAC
AGCATCCCTTTTTCAACAACACGGCCCTCCGAAGAAAAGCACGGACTGCTACTCAGCAAA
GGCATCCGCTGCTGTTGAACGAAAATACCATTTTCAAAATATGACTCCAAAACCAAATGG
AACCAACAGTGTCACCACACTAAACAGGACCCAAACTCACTCGTCGGAAGTGAACGATTT
GTTTGATATTTTTGAGTTTCCTAGCAAATAGAAACGGTGAGTTTTTCTTCAATAGTCAAC
ACTATTGAAAAGAGCACGCTAAGGCTATGTAAAGAAAATGACTCTATTTCTATACAAAGT
CAAAACGTTTGATTTTTAGTTTTAACATTCAGAATCAGTTGCATGACAGAATTATTTTAT
CCTTTGTGAAAAATTCCACAATTATTGAGAAAAAAAATAAAAAAATAATAATAACTAGCA
TAATTAATAAAAAATTTGGTTGAATTTGGTAAGCAATTATTGAAATTCAAAGTAACATGC
TGTCAGCCTTCACTAAGCTAGATTGGAAAAAACTTGATCTCACACTTTGGTTGCAAAATG
TAGAATAAAATTTATAACGCAATAAAATTTAACGACGTCTTCCATTTAAAGTCGAATTAA
CGATTTATGTTTGTTAGTTCGTCATGGTTTAAAAGTTCGGAAAGAGTTTTGAATGACAAA
TGCTTCCGTTTTTTAGAAACACCGAGGGTCATTATTTTGTTTGATAAGATTTGTGTAGAA
GTAGTGTAAATACCATAATATGAGCAAATCAAATGCATCCAATATCGAGCGAAGGCTGTT
GCTTTCGGATTGCTAGGACAATCAATTAACATATAAATTCGATAGCTTCTCTGCGTTTCC
AAAAAAGAAGACGTATCAATTTCTGCTTTAATATTAAAGCTTTCCGAAGCATATATCGCT
GGTGAATGGTCGTGGTCATAAGCATAAAGCTTTTCGTTCATAATATTATTCAAGCACTCG
TCCAACAACAACACTAGTTGCAGAGAGTTGTAACATTTGATTTCATGTCTAATCCTTTTA
ACAATGGATTTATGGTGATTGTCGTTAAACCTCTGGTTCGATGATGATGTTAGCAATGAA
GATATATTATTTACTCCATCCTTGTAAAACTCATCTCCAACGGTTAAAAAACCAAAAGCT
GGTCTGTGGGTAAATAAATCCTTATAAACGACCTCATCAGGATCATCCGCTGCTTGCTTT
AATATATGCAAGTCTGAGAGTCGATATTAGTAAATAGTTTCAAAAATGCGAACAGCGACC
CAAAACATACCATTAAGGAAACGATTCTTTTTCCTCGAACCGATGTTTCTCTTGGAATCA
AGGTTCCTTCTTTTCCATGAATTGTCATTGTCAATACTTTTAACAAAATCTAAAACACGC
GCATCGGATCCACAGTTACGAGCAGAAATGGATTGGAACGACTGTAGGTTTATCCTTCTG
GTTGAGAGAGTTAGTGGAACATGCTTTGAGTCGGCACTAGAATAAGCATCCGCGCAATGC
AATGTATTTGAAATGAGAACCATCGTGGCACACGACAGCAACCAAATGCCGATTTCTCTT
TAGATAATAGAAAGGAACTTGCGGAATCGTTACACTTCAATAAACTAATTTCTCGAGCCC
TAACGAATCACTTGTGATGAATAGTGAGGCACGGTTCAACTCATTAAATGATCACTGTAC
ATGAAAAAGGCTGAATGAAAACATGAGTTTTTAGGATGTTAGTATAGCTTAGATGAAAAC
GAATAGAGGTTTATACACTCTATCTTGACTTACAAAAGCCAATTTATAAAAATTTCTAAT
TTTTATTCAAAATATATATACATAGATATATAGTTCTATGGGAAATAAATAGAAAGCAAA
GTATAAGCATTTTGCCATTGATTTGAGAGGCAACAAAAATAGTCTCAACATTGCAAGAAT
AGGAAGGGACAATTTAAAGACCGTTTAGCGTTTTTAACGCGTAATTGGGGATAATCCATA
AAATAGACATAAAAGAGCTACTCCAAAAGTTTTTACACTCCAAGTTCGATATCGCAAAGA
GCATCCACTTTTTTAATACTATCCTGGACGTGATCGTAACCACCGATGAGATCCAAAAGA
CCATGTTTTTCAAAAATATGAAGAACTTGCGGGTCTAAAGATACCAAATGAACCTCAACT
TGGTGCTCGACATACTCTTTAAGGATACGCTGAAAGGCAAAAAGAGCACTTGAATCTATG
GAAGAGACACCTACCATGTCAAAAACAACGACTTCAATGTCTTCAATACGACGATAAGGA
GTTTCTCCAGGATGCATTCTTGGATGTCCGTACTTTTCTAAACGATTTAGTCGATCTTCA
AGCTGACTGACGTTTGCAAAAAAAAGCGGTTCAGGAATGCGAACGACTAAGATGCGGGGG
GCACTCTCGACAGCAGTCGAAGAAGGATTAGTTCGATGGGATAAAGTGGAAGCTGCATCT
TCAAGGATAAATTCTGCTGTACCGTTTGAAGTAGGAGATCTAAACATGATGCGAGAACGG
GTGGAGTGTCTTATAATTTGCATCACTGTTATGGACAATCCAAAGATAATTCCAGTTTCC
AATCCAAACATCATAGTGCATGTTGCGATAGAAAATATAATTCCCAATTCCCACCACACT
CTTATGCGGGCTAACTTGAAAATTTCCACGGCAGCGTCGGCGAACAATGATACACCCAAG
GAAACCACCATGGAAGCAAGCATGCAAGTAGGTACAGTGGAGAACACAGGCATGATAAAG
AATGTTGCTAACAAAATAAGTACACTACAAGCAATAGTAGCTACCTGTGTTCGAGCACCA
GACATTATGTTACATTTAGTACGTAGGTACCCACCGCAAATAGGAAGCCCACAAAATAAA
CTGCTTCCTATATTCGCAGCCCCTAAAGATATCAGCTCACGATTGGAGCGTATTAGATTA
TTTGTCTGCAACGAAATAGCTTTCACTGCAATAACCGTATCTATGAAAGCAAGGAATGAA
CACATTACTCCAGTTTGTAAACTTTGGGTAATAAAGTGAAGCTTATTTTTTTCAGGTAGG
GGAAGCTTAGGAAGTAGTATTGTGGTTTTAATTTCTCCTAAAATGGCAATACCGTAATTG
GAATGCCAGTCAAACTTTTTGCTCAAAAAAGAACCTAACAATAGTATGATAACTGCGTCA
GGAATCGAGACAATTCGAGGGTATTTAGCGGAAAGCTTGGATTTAAGATTTCGACAACCT
ATGAGCAACGATATTGTAATACATGAAAGTATAGTGGTATATATGTTAGCTTTCGACATG
TTCCTTATTAAAAACATAAGTTTATCAATAGGAAAGTCCGAACCTTTATATTTGACTCCA
GAAAATCCAAAAAATACAGATCCTTGATTGATCATAATAATCATAGATATTGACAATATG
CATCCACGTAACAATACTGGGGATACAAGTGCATCCAAAAATCCCAAGCGGAACAGCCCG
GCAGCTAAATTGATAATTCCTGCGATAAAGGCAATCAATCCAGTTACTAAAATTGCTGTT
TCTTGAGGAACATCGGCTTTCGACAAAACGCGTTGGTGAATGTTTTCAGCAATAAGCAGA
CACATACCAGCCTCGGGTCCGATGGATATCAGCGGGCAAGCTGTAAAAAGACAATATAAT
ATGGGGCCAATTGCAGTACCTGTTAAAATGTATATTGGGGGGACACCTAGAAACGTTTGT
GCAAATGATAATGCAATAGGCACAGAGAGACAAGCAGTCGAGCAGCCAGCTAACACATCC
CAAATGATATTTCTTAAGGAATAGTTGGGAAGCCAATGAAGGACAGGGATATAATAATTG
ATTCTTCGAACCAAACTGGGTTTTTGTTGAGGAATGTTAGCACGCTTCCATGTGGAAGAA
CGTCTAGCTAAAGATTGATAAGAAGGAATCTCGTGTAAGGGTCTACTGGTGCTAGTTCTG
TTATCGATAAAGCTAGTTTTAGGGCCCAAAAGATGGTTTTCTGAAGGAGACGACATTGCT
ACAAACAGAAACCGTTTGAGGTGCAAAAGTAATATGTTACGATTAAAAGCTTAGTAATTT
CAAAAATCTACAATACTAACGTTAAATAAAAACCGGATAAATGCTCAACGTGCAACGAAA
CCAAATTGAAAATTAAAGAAAAGCGATCAATTTCGTCGAGTCCCACAAATGGGAAATAGT
AAGAAAAAGTTGGAGTTTAGAAATAAGTCATAAGATTTAACTTGCACTTAGTGAATTGAC
TGTATTATCAAATTGGTAGGTCAGGTCCGGTCCTATAAGCCATAAGATATAGGTCCTAAA
ATCGGAGGTATCTCCGACTCTAATATATGTAAGATTCTGACGCAGATAAGTGGCCGTCAT
CGTAACTCGCTTAAGTAAGACTTAATTAACTCATACGTTACTTTTAGAAATAGACTATCG
CTTATAGTCGAATGATAATACATACAGAGCAAGAGAAAACACTGAAAAACAGTATGAAGC
AGTCGAAACAAGTGCTTTCATGAATTAATTAATAAGTTATTCGCATTTAACTTGTCAGTC
CTAATTTCATAGTTGCAACTTTTTTATTAGAGCAGCTGTGGGCACTTTTACAACGTAAAA
TCGATGAAAGATACTACGGAGAGTACTCTGTAAACAGAAACAACAGTTATAATCAATTCT
ATCATTTAATAAAATAACAGAATCCTGTTATTATGGGGTCTTTCTAGTGGCGACGCGGTT
TTAGAAATGCGTTTAAAAAAAGATGCATGTATTCTCAATATTTCAAGATATTTCAATTGT
GCTTCTACTAATTAAATTTCTTTGTACTTATAGTAATAGTTGTTGTTCCCTTGGCAGCCC
AAAATCATTTTAATGGTTAAAACAACGCTGTGTGTGAGGAAAGCGAACATCACCCATATT
TCTATAATAAAATAATTTTTTATTACCTAAAGTTTTCGGTTTGCTTTTTTTTTTAGTTTT
TGCAAACGTCAAGTACTTTTCGACGCTGTACATATTTTCGACCAACTCTGGAATTGTGTT
TCACCCTACCACGCTGAAATGATCCTTAGTGAGTTGAAGCCATTCATTTTACAATGAAAG
AAGTTAGAGTAGTAATTTGCGGTGACCAAGGCGTAGGAAAATCTTCTTTAATTTCGGCTT
TGATTCAAGAAGACAATGTGACGAGCATTCCTAAGGTAGCTTGCTCTCATAGTATAATTT
ATTGTTCTAATGCGCTAGGTATTTCCGATTATATCCATACCCTCTAATCCGGATTCAAAT
GACGATGTTTCTCTTGTTCTCGTAGACACGCAATGTGAGAATTCTTAGTTTAACTTTTTG
TGGATATTTTTTCAAAGCTAATATGACGACGTGTAGCGGATAGCAATGAAAGAGAATATT
TAGCAGCAGAAATAAAAAAGGCAAATGTGATTTGCTTAGTCTATTCTGATAACTATTCTT
ATGAACGAGTTAGTATCTTTTGGTTGCCATACTTTCGATCTCTTGGAGTCAATGTAAGTT
AATCACATTCGATTTAGCTTGTTTTACTAATATAATTGAGGTTCCAATTGTTCTTTGCGA
AAATAAATCAGAGGATCTGGACAACTATCAGGGACTTCATACAATTGAACATGAAATGAT
CCCTTTAATAAATGAGTTCAAGGAGATCGAAGCATGCATTCTATGTAGTGCCCTCGAGAA
AATAAACGTGAACGAGGTACGTGATTTGTTATAAATAATTCAATTTACTTGTGTTGTAAC
TAACAATAAAAAGTTGTTTTACATGTGCCGTGCATGTGTAATTTACCCAATCACTCCTTT
ATGGGATGCAAAAGAACGTGTATGTAGCTACATATGAAAAATTAAACCTAATAATCTTAC
TAGACAATGAGAAAAGCTACAATTCATGCTCTGAGTAGGATCTTCTGTACGTATACAATT
CGTGTGCTTCATTATGTAAATTTTTACTAACTAGCCAGTTTTAATTGATAAAAATAACGA
TGATTTACTCTCTGTTGATGAACTTAATTCACTTTCCGAAAAATGCTTTTCGAAAAACCT
AAGTATCGAAGATGCATCAGAAATTTTATCGAAAGTCAAGGAAATATGCCCTGAGGGCGT
TTATGAAGGACAGTTGACTTTGCCTGGGTTTTTAGCTTATAATCGTGTACAAGTTGAAAA
TGGTAAACAAGAAAGTACATGGGGAATCCTTCGAGCTTTTCATTACACAGATAGCCTTAG
TCTGGACGATTCATATTTGAGCCCTAAATTCGAGGTCGCACCAGGACAGATCGTTGAGCT
GAGTCCGAAGGGTAAGCAATAATTTTTTTTTATTTTATTAATGTAAAATGCAATTAGGTT
ATAGATTTTTGGTAGATCTCTTTTATCAATTCGATAGAGATAATGATGGTGCCTTGAACA
ATGAGGAACTTTCAGCCTTGTTTCGCCATACCCCAGGTCTTCCGGAAATTTGGGTGAGCT
CTCAGTTCCCAAATTCTACTGTTCTCAACGAACACGGATATGTTACTTATAACGGATGGC
TTGCTCAGTGGAGTATGATCACTCTTTTTGATTATAAAACAACATTGGCTTATTTGGCGT
ACCTTGGGTTTGACACTGATGGACGTGGTCATAATACGGACGCTTTAAAAGTTATGCGTA
AGCGAGTTTCTCAAAATCGAAAAGTTTCGAAATATGATAGAAATGTCTTTCTCTGCTTCG
TTGTAGGTTCGAAAAGTTGTGGAAAGGTGAGTTATCTATACATTTCTGTAAATTCACTAT
ATCTAACTTAACATTCATCTAGACTGCTTTGCTCTCAAGTTTTATAAACAATAACACAAA
TCGGTTAACCCCAAACACTGTCGTTAATAGTGTTGAATTCCAAAGCACACAAAGATATTT
GGTGGTATGGGATATATTTATTTAATACTTTTTAACCTTTTTTGTCCCAGCTCTCCGAAA
TTGGTGAAACTGATCTAGATATTCTGGCAGAACCAAAGTCACTTGAAGCCTGCGATATTT
TGTGTCTTCTATACGATTCATCAAACCCTAATAGTTTTTCTTTTATAGCAAACTTATTGG
TAAGACATCAATTTTTGTTTCTGTCTAATCTGTTCTCTCTTAGAATTTATACCCGGATCT
TCAAAAGATTCCCTGCGTTTTCGCTGCTACCAAGGCCGACCTGGACAGACAGCAACAAGT
AAGTTATATAAAATTTAAAAAGTGTTTAGTTAACAAGTTATGTCGTAGAGATACCCAGTC
CAACCAGATGAGTTTACTAAACAGTTGGGGTTACCCTCACCTACCCATATAAGTACTGCA
GCCATTTGGAACACCTCAAAAGAATTTTTTATTCAGGTGAGCATACATAAATCATACACA
TTTTATTTAACAAATCATTTTTAGCTGGCTGAATCTGCCCAGTATCCAGCTTCCTCTATT
ATCCGCATTCCTGAAGAAGATTCTAATAAGACAAATTACCAGCTCGTTGCCGCGCTTACC
GCTTTCGGTGCTCTACTATTATCTGTTGGCGGAAGTCTGACATGGAAGATAATAAAACAC
CAATATTACTCGAAAAAATAATGCATTTATGAATTTAGTCTAATAACTGTGATTTACCAC
CTCCCTATATCAAAACTATTCTATCCTATGAAATAAATCAATAATAAATATATATTGCCA
AGTATGCTAGAATCGCATTATGCATTATTGGTTATTTCGTAAAATTAGGGCAAAAAGCAT
GCGAACATAACGAACGAGATGTCTGACCAACCTATGCTTTTGGATATTTGATTTTCAAAA
GCATGGTTTTTAAATAAATGAAAGATATATACTACGATACGTCGGTAACAAAGGCTTGTT
TTTTGAAAATAACCCTTGACCACGAGCTGTCTAAAAATCCGCATTAAGAAAAAGAATGCT
TAACCACTGTAATAAAATATTTTAAATAAGAAAGCCAAGATATCCTAAATTACAAAGTCG
GGTGTATAAATATGCATCTTTAAAAGTAGCAGAGTCCATTTCTTGATTGCTATAAGCAAA
AGCAGATGAAGGTGGAACATGGGGAGGTATGGATGGGTCAGAGTTAATAGGCATGCCTTG
CATCTTGGCATTAATTAACTTTAACACAATATAATCCCAATCTTCATGATCTTCTCTGCT
TACAATGTCTCTTCTCTTTTCAATGCATTCACGAATGTGTTCCAAACCGCGCCTAGCTTC
ATTTTGAAGTTCGGGCAAATCAAAGACACCAATTAAAACGCATGTCGCTAAACTAAAGAA
ATGATGATTCAATGGTGTCATAGGCGTAGAAGACGAAGAAAGAATCGTTGCCATTTTCAT
GGCAGGAACAAGTACAGTAGACGGTCTAGCATTGATGCACAACTCCAATAAAACCTTCAC
ATGGGTAACCGCCAATGTCAATAAATTCATCTGTCCCCAAACGACATCAACACTTTGACG
AAAAGCATCAATCTCAGAGCGAAGCTGTTGAGTAACGATTGGACTTTGTCGATCGGTAGG
ATCTGGTGACTGGAAAACATCAGAAATGTGTCCCACTATCAATGATAAGCGTACAAGTTG
ACTAGGGAAAGTGCCTAAAAGTTTTTGATCTTGTATGGTCAGATTTATGAATGTCTCAGG
AAGGAATAGAGGAGAACATGTAGACATTGAATGCCATCTATCTAAAACAACCAGCACCCA
CCACGCGCGGCGACATAACGCTTCGTCACTGTCCATGTCTTCATTAATTGACTGCAAAGA
TAAATGCGATTGAATATGAAGTCTCATGTTACAGGCTAATCCAATAGCAGCGCCTAGCCA
CATTCCCTGTGGTAATCCATTTCGACCAGTAATAGTAGTAGGTCCACGCTGATCACTTTC
AATAGCAAGTAAAATCATAGTCTGCAGATGCAAAATCCGATTTGAGAGATCCTGAACATT
ACTACATATCAAGTTGAGCAACCCAATTGCTTTCATAGGAGTATTATGAAACACATGACC
TAAAGTAGCAAATGGTGGTCGGTTAACAAGTGAGTAGATGGCATGTAAACAGGAAGAGCG
CAGGTTTATGGGAGCTTTCTCAAGCTCGGACTTTAACCTTGCCTTGGAATGATGCAGGAT
TGGTAAAGTTGAATGAATAAGCAAGTAATATCTATCTATAGCAGCATCATCCCATTCAAC
ATTCTCCTGATAAAGTTGTTCAACCTCACGAAATGTTGCAGCATCTGAAGCTTGAGTACT
TTTGGAACGCATCGAAATTGACTCAGCATCTGATGTATAATTCCGTAAGGGGTGAGGTGG
AGGAGCCTGAGTAGATGCAACACGATATGAATTTTGCACATTGTTTAAGCTTTGCAGTGG
TCTCAAAGATGGAGAATTAACGCCAAGAGATGGTTCAGGAGTAGATGGATTCATTAACAT
GGGATGGCGAGACATGCCGCTAGGGACACTTGTAGTGTAACTGTTAAGAGTGGCAGGTGA
GTTAGAAGGGACGGTAGTAACGCTGCTATCGAAAGATGTAATAGAAGGAAGTACATTAGA
AACCCTATCATTTACGGTAGGATTCCCTCGAGGAGGTAAGTAAACTGGATTGTTTGGCTT
GGGAGGGGAAGGAAAGTTACTAGATAAGGACATGACAGCAGGATTGCTGTTTGAAGGATT
AGATAAATAACTACCATCCAATGTAGGAGCGGTAGAAGCAAGTATAGGGCCAGAATACGG
CTGTGGACTAGGACTACTAAAAAAAGTTGGAGGTCGAAAACCGGCAGAAGGTCCTAAATT
CGAATTGGTATAAGAGCTTATTGAGCCAGGGCCCAACATTTGCGGGTAAGGTGGCATAGC
CTGTTGGTTGGCGGGTGATAGTTTCATAGGACTAGGTATTGAAGGAGCTAACTGGGGAGA
ATTTTGCGCGAATTGGGCATTATATGTCAGCCAAGAATCTGGTTTTTGATCTTGCGAGAT
TTTTTGATCGACTCCTAAAGGAGCTGGTGCTGTAAGAGTAACCGATGGTACCTGTATTGC
GCTAGTAGTGGTATTCACGGAATCAACTGGAGTTATCGACGGAGCCCTTGAACTGGGACT
TGCTTCGTTTCCGGAAAATACAGAACCATTTACAGCAGGAGAAGATGATTTAGCAGAACC
AGAGGCTCGCTTTTGTTTTTCATCAGCATTTCGATTAAACCCTTTGGCAGGACCGCGTTT
TAGGGGTGTTCGAGTAAAATTGCAATCGAGATGATGCTTACGACAATTAATACAAGCGTT
GCCAGGACGAGGACTTTGATCCATATCACAACGAATTTTTTTCTGCCGACAAAAATCGCA
AGCGCGAGAAACCTTTTTACGAGATTTTACATCCATATTGGGTGATGTAGAGTTTTTCTT
GTATTTCATACGAGCTTTTTTTTCAGGAGAGCTGACGACAGGATTAAAACCAGAGACACC
AGCGGAAGCATCTAACAAGAACGGATACGAACGTTCATTGACTGTAGGTGCAGATGAAAC
ATTGACAGAATTGATGGAATGAAAAGGCAAGGTGTTAAGATCCATGAAAGTCAAAAAAGT
ATCATTAATCTGAGTAACCCTGAAATTAATAAAATGAACGAGGGAACGATATTTTAAAGA
TTAAAGTTGATAAAAAATGAAAACCAGAAAACAATAGAAGATTAAAATATAAACCGAAAG
ACAAAAACAAAAAAAACTCACGAAACAAAGAAACTTCACTAACAAAGATTCAAACGTTAA
AAACAATTAAAGAGAAAATGCAAAACGCAGTTAAAATGATGAACTTTTGAGACAGACGTA
AAAAAGAAAAAGGAAAAGAAATCTAACAAATGGAAATGACTAAGTAAGAAAATCGTCAAA
GAAGAAACAGAAAAAACAATTGTGCAGTAGAAAGAAGATACATCAATAGGTTTTGTAGAT
TTCCGGATACAATAAATTTGATCTTCGTATATTTGAGCGGTTTCTTTTTTACCTCTTTAT
GATGACGCTTTTCTAGATCAACAACAAAAAAAGACCAGCTTCTAGAAAAGAATCCTAAAA
TTCGATCAATAAATTAACGAACCTGATTTAAGGGGAAGGGAAAGGAAAAAAGGATATGCA
GCCCTGATGAAATGCGCAGAACCGAAACAAAGAGCGTGTGAGGGAAGAAACCGAGATGAG
AAACGGCTAGCTTAACAAAATAAAAGACGCGCAGATGCAAATTATAAAGCGCACAAAGGA
ATCAAAGTCAAATCCCCAACAAGCAAGGCTATGACAAAGAAGATGAGCGAAGCAAAAGGA
AAAACAAGATAAAAGCAGTAATACCAAACAAAAGTGATTTTAAAATTAAAGATTTAATAA
TTAATAGGAAAAGTAAGGACAATGTAGGAGATGTTCCGCATCGACCAAATTCCCTGTGCA
AAACCGAGAGAACACGTGAACGAAAAAGAAGCACGAGAAAAAGAAATCAAATAAGTGAAA
AAATTTTGTTAAACAACTCACTCAATTACAATGACTATTCACAGATCAAACCAAAAACAA
ATCGTTGTGTTGTGGAGAGACAGTCAGCAATTTTACCCAAGGAAATCGCTACGCTAGTGT
ATGTAATATGATGAGCTTAAACGAAGAAACGGCTGTTTAGAATCCTATTTCGTTAAGCGA
AACAACGGAACCGAACGAAACGTATAAGGAGATGCAATAAATGCGGTAAATTCGGCGAGA
TGAAGTGAGAAAAATTGCGAGTTTGGTATTAAAAACAAGAGTGAAAAGGTTGAATAAAAG
TATGAAAACCGTTAGTGATTATAGACACTTGAAAAGAAAAATCAGATGAAGTGTCTCTAA
TTCTGTATTTAACTCCCAGAAAATGAATTGTAGGTCAACGATATGATAGTTGAACGATGG
AAAACAGTGAATCCACACACAAGCTTAAAAGGAATGAAGATTTTTAAAGCAAAACGTACT
GATGATGAGACCTAAAGAGAGCTGAAAAAAAGGGTAGGGAGTCTGAAATAAGTCACAACG
AAAAGAAAAAAAACAAGACTTGGTGATCACAAAAAGAGATGGCAAGTTTGTGGAAGTGAC
AATCGAAGAATGCTATTCGAGACGCAGTAAAGGTATGGAAAACGTATGATTAATCCAAAT
ATCTACAATCTTCGCTGAAAGGTATATGCTATCTTTTCTTTTGGTTTTCTTTGTTGAAAA
GAAACTAAGCAGAATAGCGTAAAAACAAACAATGATTGTAACTGAGGCGTGGGTAAGCGT
ACATACAAGTTACCGCACTGAAGAAAGCGATGGAAAGATGAAGAAATTAAAGAAAATGAG
AAGAGATGAAATTAACAAACAATGAACCTCGAATTATGTAAACAGCGTATTCAAATTATC
GGAAAGAGTAACTGCTAACCAGCAATATACGCTAAAGACTGTTGAAAGAAAGTAGGGTGA
TAAAAAATGTTTTAAGTAATTATTAGTCAACAAGATCCGTGTGGAAACTATCGGAACACT
TGAGACAAGGGTATAAAAGATCGAGAAAGACAAGGTGTATGACTAAGATAAAAAAAAATT
GCTTAGTGATGTATAGAATAGACAATCAACAAAGCACTAAACTACACAGGCGAAAACGGT
AACAACAACGTAAATAATGAATTTACGCTCCTTTGAACGAACTATACCAAACGATAGCAA
CTATGTCAGCAGTCCGTGAAGAACCAAGTAAAAACAAAGTGTTAACGAAACTATTAATTA
AAAGATTGAAGTTTTCGCAGGCGTTGAAAAGAAGTAATACTGAGGCTTACTAAGAGTTAC
CGATAATCTATTTATATATACCCAAGTCAAAAACTGGGAGTAAGAGAATTCGCGAATTTA
AAAAAACGGAAAATCATCGCTACTAAAAATCCGACCCTCTACACGATTTGATTGGTTTGC
TACAGCTTAATGTGCATCCTAACCCCTGATGTAATGGGGTAGACTTTACAATTTGATTGG
TGTTCTAAAAAACGGGGCATGAGCTCATACCCATGATTACCCACAACAACCGATGTTTAC
TCCATACTTCAATTGCCTAACTACGTCATTATCAAGTCACAACACGGTAGTTTCCTTTAA
AATGTTCCCAAGTCGGCTATCCAGAACCAATCATACGCAAAAGCGAATGTCAAAACCCCA
GAAAATAGTCAGGAGACTGCATCAAGACATGATTCGATGTAATCTATGACGCAGAGCACA
ATTTTGAAATACAGGAGGGAGAAGCGAGTGAAAAGTCTCATTCATAACGTCACGGATGCG
TGTAAAAATTTGTGGGGCCGTGAGTTGGTCATGGGGGTACAGTTTGATTATGGGGGTTAT
GGGAATATGTAACGGATTGGGATGTGTGTTTTATATGTGTATGAAATGTACATACTGTAT
AAGTAGTGTAGATATGCTTGTTAAAGAGTTAATCCCAACATATGTGATCATGTTAATGGA
GGCATTGCACTGGTTTTAAGTCAGACTCTAGTTTAACTCGGACTTTGGCTTAGCGCGGAC
TCGGACTCGGATTCGGAGTAGGACTTGGACGGAGAATAGTATAGAATGAAAAAACTGCAA
GCACGAGGTTGCATATGTAATCAATTTAGCTCTACTGCCAAACACTAGTAGAAGATTTCA
TCGCTTTTAATCTGTCGGCCGTTTGAATTTGCCAGATGCAAATGCAAGTTTAAAATTTGC
ATGGTGCTGGTTTATTAATTGATATAGGATGAAGTGTACAGCGTAAAGGAAAGTTATGGA
TAATTGGTATGCTGCTTGTTTTTTTACAAAACGATATTTTTTAGAGTAGTAATAAATGAT
GTGATTTTTGAAATTGCTTTAACTTGTCAGACATGTCTTTCCTTTTTAAAATAAATTTTT
CATCAGTGGATTTTTTTAGAGTCACTTTTATTTCATTTAACATTCATTTCTCTGTTTGTA
GAAAAATCATGTTTGAAAAGGAACAAATTTATTTTCAATAAAACTCTTTTCATACGATTA
ATTTTTTTTTCCTTTACTTACAATCGACTTCAAATTCATAATCGATTTCACTCTCGCAAG
CGTTTTCGTCAGTTCATTCGGCTTGTTTCATAGTATCGTGGCTGGTCCAAACCCATCATC
AAACTTAACCGACTCATTTTGTTTCATCAGCCACTCTTTATTCCTTGCATCTAATGAATG
TTTTTGCATGAAATGGTTTTCACTTTGTGCCACCCAACTTAGCTTTAAGAGTGCCGACCT
CCTTCGTTCCACTTATCCCCCTACATATATATATATATATATAAAATCTGCACTCACGGA
CGCATTAGGCCGATCGATTCCTCCTAAAGTCTATGTGTGCATGAGGACATTTTTCAGCTG
GACAAATGTTCCTATAAAGTGGACTTAGCCGTATTTGCCATGGGAAACGAATCTTCTTCT
TGTCTGCTTTCCCTCTTTCAAGAAATGATTCAACCCGATTTTCCTATCGTTAGTTTGATA
TAACAAAATGGAACGAAGTGTGCAAACAAAATAACTTGCACTTCCTTATTTTGACATTTC
CGAGATAGACACTACTACAATGCAGAACGGTTTTGTAGGTTAGGTCGGTAGGTAGGAAGA
AAGGGTATATAGTAGATATAGATGGGCTTTGTTCGTTTCTTTAGTTGATTGATTTAAATG
AAACGAACAAGTCCATATGATGTATGGATATCTGTTAATATGGGTTTAAACAATTAAATG
GAATTTCCGCCATGTTTTTGCATTACTCAAGCTGGATATAGGGAGAGAATGAGTTTGTAC
GAAATGGAACAAGATTAGTATGACTATGGGACTGGATGAACAATTGCAACTTGTACAATA
GGCGTGATCGAGACTAGGATGTTGGGAAGAATGATATTATTAATAATGCAACGATGAAAA
CACCAAAGATCATCCTGTTTGTTCGTTGGTTCAGCAAACAACTGGCGTAAATCGTAACAT
TTTAAGAAGTATCAAATAAATTAGTATCTCCGATGTTGCGATCGAGATAAGCAAGCACTT
AGGCTACATCGAAACAAAAGTCGTTAGAGAAAGTTACTTGCAAAATGGATAGCATCTCGC
TTTCCCATGGTATCAAATTGCATCAAGTCTCGACTCTTGCTCATGTAGCGTTGTCCGCTC
TATTTTTTCCCCTAAACACTTGGATTTTATTCATTTATTGGAGCAACATTTACCTCGTCC
TCGGTTACTATTCTAGTGACCACTACTGCTGTTGTTGCTATTCCTAGTGTTTCCTTTTTT
TTCGTTCGGATAGGAATTTCCCGGTGTACATTTTATTTGGCAGCGTTTTAAACCACTAGA
ACCGTTGAACCGTTTCCTTCATAACTTTTCATCGGCCTATGCAAGTAAAAGTCGACGGAT
TCGCTACTTAGCATCTTATTGGGATTGCGAAATGATTGTACAATGGTGAGCACAAATTGA
CTCATTGTTGTACACAAATCTTCGTACTTTTGTTACTAAGTGTCCCTTTCCTTACTATGT
GCAATTTCCACCATCCTCGCTTCATTTTCCTTGCCCATCCTCACACTCACCTCCAACGTT
AATATGTAAAGTTTCGTAAATGTATTTTATGCAGCTCCTTTATGCATTTACTGGAGTCTA
AGCTCGGCTTATAAAGGATAACGTGGTTCTTCCGACTCCTTGCTTTCACCGTTCAGCCTG
ACTGCGGAGCTACAAGGATGTTATTGGCTTTGCTTGCGAATTGCTCGTCCAAGCGAGCCA
ACTAAACCTCTTGATGCCTCGCCTACTGTTCCCTTCCCTAGCGTTACCCGAGAAAGTGGC
GCAAACCTTCCCCATATTTCCTGCGTCATAGAAACGAACCAATCTTAGAGGTTAGACCAC
TTTATCTGTTCTCGATTCATCCACGTATTGTGCGATCATTTTGTATATAAACAAGAGAGA
TGGCTTCCTGCTCTGCTCAACACACACTCTCTTGGTAAACTGTTAATCTAGAAAACCGGG
AAGTTTCCGTTCTTTTCGTTAACGTTTTATTTATATTTCAAGTCTCTATTCTGTTCACTT
GGAAATTATCATTTATCAGCGCTTTGTTTTTTTTGGAGCTACTGTTTTAGAAGAAGTTTT
GATCAATTCTTTGTTTTAAGGGTATACACATTATTTTTGGAATTATTCAGCCATCATGAA
TTTCGATAACTTGAAGAGTTTTGCCGGCAAGGCCTACAACGAGTACCAAAAGTACAACAA
CAATGACAGCAACAATAATAGCAGCAATAACAATAACAACAATAGTGATAATAACTCCTA
TGGAGGAAATAACAACAATGACAATTCCTATGGAGGAAATAACAACAATGACAATTCCTA
TGGAGGAAATAACAACAATGACAATTCCTATGGAGGAAATAACAACAATGACAACTCCTA
TGGAGGAAATAACAACGATAACAACTCCTATGGAGGAAACAACAACGATAACTCCTATGG
TGGAAACAACAACAATTCTTCCTATGGCAGCAATGACAACTCCTATGGTGGAAACAACGA
CAATTCCTACGGTGGAAACAACGACAACTCCTATGGTGGAAACAACAACGATAACTCCTA
TGGTGGAAACAACAACGATAACTCCTATGGTGGAAGCAATGATAACTCTTATGGAGGAAA
CAATGACAACTCCTATGGAGGAAACAACAACAATTCTTCCTATGGCAGCAATGACAACTC
CTATGGAGGAAACAACAACAACAACTCCTATGGTGGAAACAACGACAATTCCTACGGTGG
AAACAATGACAACTCCTATGGTGGAAGCAATGACAATTCTTCCTATGGCAGCAATGACAA
CTCCTATGGAGGAAACAACGACAACTCCTATGGAGGAAACAACGACAACTCCTATGGTGG
AAACAATGATAACTCCTATGGTGGAAGCAATGACAACTCCTACGGAGGTAGTGGGAAGAA
GCATGGTAAGCACCATAAGGACGACAACTCCTATGGAAGCAATGATAACTCCTACGGTGG
AAACAACAACTCTTCCTACGGCAGCAATGACAACTCCTGTGGAGGAAACAACGACAACTC
CTATGGTGGAAACAATGATAACTCCTACGGTGGTAACAACGACAACTCCTATGGTGGAAA
CAATGATAACTCCTACGGTGGTAACAACAACTCCTATGGTAATTCTGGTAATGGCAGTGG
TTATGGAAACGACTATTAATATTGTAGGTAATAATGATAGTATTCCCTCACAAAATTTTA
AGAGTGGTAAAACTTTTGTTTCAAACGCAAATTCTAGTAATTCTAATGATGGGTCTTCCT
CAAAGTCCTTAGATGTGGGTTCATTTGTTAATGCATTCAAACAATTAAACGTCAACGACA
ATTCGTCGAACAATAATTCATCTGGCAATACAGATAGTTCCACTATCGGCTATGCTGCTG
TATTTGCTGCGGCTGGCAAGTTTTTCAGTCAGCATTCGTGTGATTTGGCAAGCGGTAACA
AGAGTGCTCAGGAAGGTCAAAATCAATTTTTAAGCATGGTGGAATCGGAGGCTAAGAATC
TCATGAATAAAACAAATTACTCTGCTAATCAATCCCAGAATGGGAATTCTCAAAACAGCG
GTAATCCCGTTAGTCAAGCCATTGATCTAGCGAAATCCCTGTTTCAAAACCGCAATCTGC
TTACAAAGCTAGCGCAAAGCGGAGTCCTTACTAATGCTGCACAAGGTTCTTCAGGAGGCT
TAAGCGCTGCTGCTGTGTCGGGTCTTATTGGTTCTTTTATGGGATCTTCTTCGAACAATT
CTAATTCGTCTAACAACAATTCCAATACATCCAACAACAATTCCAATACATCCAACAACG
AGTCCATGGTTAGCAAGCTGTCTTCTCTCAGTGGCATGGCTAGTAGCTTCCTTGGTTCTT
CCGGTAATAATAACAATAACAACAACAGCAACTCTGGAAACTACAACAACAACAATTCTG
GGAACAATAACCAACAGCATCAGCAAAGTAGTTCTTCCTTGCAAGGTTTAGCAAGCAGTT
TTTTGAACTCATCTTCTGGGAACAGTAATAAGCAGAATTACAACAACAACAATAACCAGA
ATTATGGCAATAACAACAACCAGAATTACAATAACAACAACAACTCATCGCAAGGTGGAA
ATTCTCAGGGCGGTTCTGGTCTTTTAGGGCAGGCGGTGAATATGTTCTTGAAATCGTGAA
TATCATTTTTCCTTCGCTTAGTCATTAATTCCTAAACCTCTTCTATCCCACAGAAACTTC
AAACGCTAAGCTATTCAAATTGAAAGCGTTCGTTCTCATTTTCTTTGGTAAACAGGTTGG
TGAGCGCATTCTAGTTCTTTTGATAGTTAGAATCGTATACATATACCATATACATATTTA
TACAGACGTCAAGGCAAGTGGTTACTCTTGGTTCATATTTAATTAGTATTTACTATATAA
TTGAGTATCGATGTTTATGGGTCATATAGGTGTCATTCAACCTTTCTAAATCGAATAGTA
CGTAGCATTAGAGGTATGTCTGTATTCTATAGACAAATTAGTTTGTTTTAGTAGCTTTTC
ATCTAAATAGTTAATATCTGATATATGCTGAAATCTACAGTGTAAACAAATATCCTTACA
CAATACTTATAATAATATGCTTATCGTTATAGTATGTTAACTCTCTTTGAGAAGCGCAGC
ATGCATCCTGTTCACTTGAAATAACGATATCGCTTACATCCATCTTTTTCACAGGATCCA
ATGGTTGGGTTTGGGAATCAGCCATGTCCCATCTGCCATCAGCAAAATAAAAACGAGCGT
GAGTATCGCTGTGTAGGCATCTATATATAGACCAAATACCCGCTGAAAGTTGGAATAAGC
AATCGATACTTTTATCTCGGCTGATCGCAAATTAAAAAAGCATACTCTCATTTAAATAGG
TTCCGTTGTTTGAACTTTTAGATTTTTCGACAAATTGCTACTGCTTCTGATTTTCCTATT
ATTTAAATAGTTTACAATGTTTACTAGAACAATTAGGCAACAGATTAGGAGATCTTCTGC
CCTTTCTTTAGTGCGAAACAATTGGACTCGTGAAGAAATTCAAAAAATTTACGACACACC
ATTGATCGATTTGATTTTTAGAGCCGCTTCCATACATAGAAAATTCCACGACCCCAAGAA
AGTTCAACAATGCACTTTACTTTCTATTAAAACAGGTGGATGTACAGAAGATTGCAAATA
TTGTGCGCAATCTTCCCGCTACAATACCGGTGTCAAGGCCACTAAGCTCATGAAAATTGA
CGAAGTTTTGGAAAAGGCTAAAATTGCAAAGGCTAAAGGAAGCACTAGATTTTGTATGGG
AAGTGCCTGGCGTGATTTGAATGGTCGCAATCGCACCTTTAAAAATATTTTGGAAATCAT
CAAAGAGGTTCGCAGCATGGATATGGAAGTTTGCGTAACCCTTGGTATGTTAAATGAACA
GCAAGCCAAGGAACTAAAGGATGCAGGCTTGACGGCATACAATCATAATCTTGATACCTC
TCGCGAATATTACTCAAAGATTATCAGCACTAGGACATATGATGAACGGTTAAATACTAT
TGACAATCTTCGGAAAGCTGGGTTGAAGGTTTGTAGCGGTGGTATTTTGGGTCTAGGGGA
GAAAAAGCATGATCGTGTAGGATTGATTCACTCGTTAGCAACTATGCCAACACATCCTGA
ATCTGTACCCTTTAATCTTTTGGTCCCGATTCCTGGCACCCCTGTAGGAGACGCTGTAAA
AGAGAGACTTCCGATTCATCCTTTCCTTCGCTCCATTGCAACAGCTCGTATTTGCATGCC
AAAGACTATCATTCGTTTTGCAGCTGGACGTAACACGTGCTCCGAGTCCGAGCAAGCACT
TGCTTTCATGGCTGGTGCTAATGCAGTTTTTACCGGTGAAAAAATGCTTACTACTCCTGC
TGTTTCTTGGGACTCAGACAGTCAGCTTTTTTACAATTGGGGTTTGGAAGGAATGCAAAG
CTTTGAATATGGAACTTCTACTGAGGGAGAAGATGGCACTTTCACCCTTCCCCCGAAAGA
GCGCCTTGCTCCTAGCCCTAGTCTTTAATCGTTGTAATGAGTTTCCATTCATTCTATTTG
TAAACTAAAGTCTCTTTTTTAAAAGCTAATTTTGGTTTTCCCAGCCTGGTTCTTTGATGT
GATTCCAAAATCAAATCAGACTGTAATTTTTCTTCTTCTACCAGTTACATTCATTTAATA
AAGCCACCGTGTTGCTGATATATTGATACTTTAAATTTGTTGCAAGGAACTTCCATTTAT
TGTTTTTCCAATAGAAGTTGGGAGATTTTGAGTATTTCAATATCAAATCCCAGACATCAT
AAGAGCCTCACAGTTAGCAAAAAGCCGTTTAGAACCCTTTGAATTTACTTGTGCTAATGT
GCTGTTCATTCGATAAATCAACCGTTAGGTTATTATTATTCAAATAGACGACTTCAGATA
AGGTTAATATGGGACAAATTCTTATTAGATGGTTTATTCCCTACGGAACAGAAGTCTTTC
GCATATTAAACATAGATCAATGCACGAATTACTCTCAGTTTGCATATTAAACAACTTCTG
TAAATTATCTCACTCATCACGACAACGCTTGATTGCTAATTATAAATTTGTTACTAGAGA
TAAACTTAAGTTCGCTCACATAAACGTGGAGTGAGTTTTGAGCTTTAGCTACTATATATT
TTGTTATAGATAAAACTAGCTAATAAATAGCGTGCACTTGAGTTCGATAAGCGCACTTTG
TAACCGACCAATATAGTTATATTTCCAGCAAAGTTCTACGACTTCCGTTTTATATACCAA
CTGACTTTTAGAAAATTGGTCTTCTGAAAAACGTTGGTAGAGCGACTTTATTGCATTTTT
GTTGCCTTCATTTTCTTGAATTTCTGCTACGATACACTGTGTTGTAAGCGAGTCGTTTAT
TGTCATTTAATGAAGTTTAACGAATTCAAAGTATTAATTATCCAAGAGCTGTATGTCATT
TTGTAGAAAACATGAACCAAACGTAAAAAGGAATAATTATAAACGCAAAAACTGGTAAAT
GCAAGATTGGCGCGCAGCATTAGAGGTAATTTCTGATTATTTTACTTCTCACTAAGTGAT
TTAGGAATATTATTCGAGATATCTAGATTCTGCGCTAGTTCTTGCAATTGTAAATGACAG
TGATGATAGTAATACCGCACGAGAAATACTTGAAGCTTTGTCCATCGAAAGCCAGTGTGA
TTCACATGAGGAACATTGGGATAATTTGAGGCGTGATGAGCAGGAATTATTAAACCTTAA
AACTCTAGATGAAGAGATAAACAAAATAGATGAGGAGGATTTTACCTGGGAACTAAAGGA
TTCGAGTTTAGAACTAGATCCCGATGTCTACAATTTTTTGAGATCTATGTTTAGCGATCT
TTCTGCTGCGCGGGTTCAATTGGTTCAAGCGAAATGTCAAAACGACCTCGTTCGCTCAAG
CGATGAACTGTTAAATCATCGTGCCATACAGGAAAGTGAACAGATAGAGACTGCTGCTGA
CGCTCTGATTACTTCCAACATAGGTCACCGTTCTCGTCAAAGGAAAAAGAAAACTAAAAA
AGCAACTAATTCTAGAAAACCTTTGAGTAAATTTCAATCCAACACTGAGGAAGTCAATGA
AGACCCAATTCTAAAGCCTTCTCTTTCCGTTTGGGAAAATAATCGCCTGTTGATTGAGAA
GCTTACATCTATTCTCAATATTCCATCTTCACAAATTAATCATGAGTTTTATAAAAATTC
GAGTGCTTGGCCAATAACCATCAGAAATTTAATTCATAGGCACCAGCCGCTATCAAATAT
AACAAATAATGAGTTGATGAAGTATCAAGAAGAAGCAACTCAACTGGCGAAAGATACTGG
TCTTTCACTTAAAATTTGCACAGACGTTTTGATTTGTAGTAACGACTACAAAAACGCATT
ATGGATTTTATGCTTAATTAAGGAAACTCAGCATAATGAAATGGGAAACATCAAACTGAG
TTCACAAACCGCGAAGTCAAATTCTTCGACGCAGACCAAAACATGCTTAAATGATCAGAG
TAGTAAGTTGGTTGAAGATGATGAAGCGTTGTCTGCTGAAGATTGTAACCGTCTTGCCGA
AGAGTATTTGGAATTACGAAATATGCAATATTCTAACTCGGCTAAAGAATATCGAAGAAG
CAAAAGTAATCATCTTTTTGGTGGTTCTGCAATGTATCATGCTCAGTTAGGGCGCGAATA
CCACGAAAAGGCACTTAAGTACCGATCTCTTGCTATGCGATCTCTTGCACATTCTGGAAC
ATCTCACTCTTTGGATTTGCATGGAGCTACTGTCCGCGAGGCAAAGACAATAGTCCGTGA
ACGTGTTGCTGCTTGGTGGGCTAAAGAGGCAGATACTTCTCCTAATAGTATTCGTCCTTT
TGTTATTGTCACGGGTCGTGGCAATCATAGTATAGGACTTGAAGCTCGACTTTTGCCGGC
GATCGTCAGATTGTTACAGCAGGATCATTGGAGGTTTGATGCTGAGCATGGTCAAATAAC
TGTATACGGTATTAATCGACACTCTAAGCTTAATAGCAATGCATGAGCATGCGATCTATT
AACTTGCGCATTGCTAGTCTGCCATATTCTTTTGGTTTGTTCTATTTATTTATTTTCGCT
CTTCCAACTGCGTTAACATGTTACACCAACATTTTTTGCTTAAGCCCTTATCTCGAGCAA
AATATTATTTATTATCAAAAGTAAGTAATTGTAGTTACTTGCTCGCCGAGGAGAGCACAT
ACTAAAAAAAATTGATTCATAGGGTTTCAATAGATTCTTGGTTAAAGAGATTAGGTAATT
ACAATAAGTGTAATTGATGTAGGTTTCATCATGGAACAGAAAACAATAGTCGTAAAGTTA
CAGAACGTTTAGTCGAGAATATCAACATTACAATAAGGCTTTTGTATTTGGCAAGTATTA
TAAACCAAAGAACAAATGTATCCAAAAGATAGACGCTTTAGTAATGCAGAAAATCGCAAT
CCTCATGCTAGAATTGCATTATAAATGGGAAAAAAGGCGCCACGTATTTAAGATACTTCG
GAAGACGCATAGGAGGATGCGCCGCTGTCATACAGAAACCGTGAATTGGTGCGAGAAAAT
GGAACAGTATTATTTCTTCCTGCCCTTTCAAGGGATCCATCAGAAAGTAAGTACGCAGGA
GAGTAAGTTCCATCGGGATTTTTTAAAGCAGGGTTAGGAGACGTATCAGAAACGCCGCCC
AAAGAGGTGTAACCTCTATCATATAAAGAACAGTATTTTGTGTTTGTTTCAAGAAGTAGC
TAATGTTTAGTATATTGATATAGTAATATGTCAAAGAGAAAACTTACATCCCATATTTCA
GTATAAGACCAATCCAATATTGGTTGTATTCTCATAAATTTAGGCCAACCTTTGTCTGTC
ACTTCAAAAGCTATACGATGCAAGCCATGCGGATCCAGCCGCCGAATACCTATAAGTATC
GCTTGAATGTGCTTATGTTCCTTGAGAAACTTGCAAAATGCTTCTTTCATGGGAAGTGAT
ATTTTAATGATATTAAGGCGATATTTTGACTGACACTCGTTCACAAAATCATCCATCTCT
GGAAATTCATCTCTAGGTCGAACAAAAACGAAAGGAATATTAGAAAGTTTTGCTTGAGCT
TGCTCTTTGTATTTTTCTTTAAGATAGTATATACACAATAAAAAGAGAACTAAGCAGTCT
TTTCCTCCATTAAACGACATAGCAAGTCTTTCTGGTCTTGTAATAAACGTTAGAAAATAA
TAGAACTTATAAAAATAGTGCGCGCATACTGATAAGTTTCGAAAGCATATTCAATAAACC
GCAGAGAAATGCTAAGTCGATTTTGTAGCCCCACTAGCTTCTCTGAAGGTGCTGAATGAG
TGAAAATGTTTTTTATACTTTGATATACACGTTCCAACTCATCCATTGATATATTTTATT
CAAGAAGCCTAAGTTTATACCAAAAAATTCGCAGTTATCGTTTTACTATCCAGATATGCA
CGACGGCTGACAAGTCAACAAAAACCAGTAAAATAATCTTGATTAATATTAAATCGTATA
TAAAAAGGATATATCAACACCTTATTGCTGAAGTCAGAATATAGTACGTTGATCTTAAGT
AGGCATCAGTAAGTAGTGAATGAATGAATGTAACTCGACGCGTGATGCCAATCAACCCGA
TATTTTTTCTATACCAACGTTATTTCGTAGCTGTGTTCGCGAAATGGTTTCAGTCAGAGA
GGAATGGCTTTGAAAATCTAATTATTATATACCCATGCATTTCCTTAGCGATATCGTACT
ACAATGATTTCGTAAAAATGTAGTCGTAACAAACAAATGGTAAATGATCTGAACATCTTA
AGTAAATTTGTTACCTGCTAATTGAATTATTCAATTAGGGCTATGAAACGTTTGCAATTA
AGTCTGAGAATCATGGTTTAGAATACTAGTTAGTTCCGCGTTCTTGCTGCTTGATAATTA
CGTTATATCTTGTGCTTTCAGTCTCAATATTTTTATTCTAATTCACTAATTATAGTTCAA
TATTACTTATTCTTTGCTATACTGCTTAGTTATCCCAGAATTGCTAACTCGATGATTAAC
TTTTCTGGTATTTCACAACTCGAAATATGCAGATTTCTATATTACAGCGCTAATTTTGCA
AAAGATGAAAAGCAGAAGGGTAAGACTCAATAATACCTTGTATAATCGATGAATTATTAA
CTGTTGTAAGAACTGAATCTATTAAAATCTATTTAGCCCCTGTATGTAAAGATGCAAAGA
AAAAAAAAAGGATCCTCTTTAAAGTATTGTCTATATACACTTGAATAGTGATTATGTTTA
ATATACAAATTCATGATAAATAGCAACGGTATATAGGACAATAGACCATGAGCATCGCCA
CCAACAATATTCTAGGATATCGAAAGTAAGAATTATTAACAATTTTTTATTTTTTATGAG
GACAACTTAAATGAAAAGTATATCAGTCTTTAGCAGCATTATTGTCAACCTCCGATTCTT
TATTTTTTGGTTTTTCTTCTTCAATAGACAAGGAAACTTGATTCAAGACATCAGGCTTTT
TACTTTCCTCAATTTCGGGTTTCTCCAATTGACCGTCGATATTAGCGGACTGTTGCTCTT
CCGTAACGGAAACATCGCCCTTGGTAGTTTTTTCTATTGTGCTTACGACAGGTGACGCCT
CGGTGTCTAAATCTAAATGGCCGCTAAGTACAGATTCGTTTGGTTCTTCGGTTGAAGATT
TTGACGACGGTACAGCAGCATTAGAATCCGTTTGAACATTTTCGCCCTTCATGGTTTCTC
GAAGTTCCTTATTATCACCCTCTACAGTCTCACTCTTCATCTCAGTTTTTATGTTAGCCT
TTTCGTCCCCGTCAGCCAAGTCAGTTTTCTCCACAGAGTTCGGTTGAGAACCCTCTAAGG
GAACTCCTGTATTAGTCTCCTCCGCATCCGTTTGTTTGGAATTATTACTGCTGCTGACCT
TGAACTCTCCATCACTCTCGTTTCCCGTAATTTCAGGTTTTGTATTGTTGCCATTATTTT
CTTCGTCAAGCATGTCTTGCACAAGACGTTCGCCAATTTCTTCTCTATCCTTACCATCAG
AGCTTAAGCTCATGTCAAGCGCAAGTTTGGTGTTCGCTAATTTTTGAATATATTCTTCAA
TCGTATTATCGGTGATTAACCGAATTACCGTTACCTCACGGACTTGTCCAACACGATGAG
CACGGTCTTCAGCCTGCAAATCATCGAATGGATTATAAGAGCAGTCATACAATATCACCA
CATTTGCACACGCTAAATTAATTCCAAAACCGCCAGCTTTTGTTGAAAGAAGGAATACAG
TAACATCTTCCTCTTTGTGAAATTGATCTATAATATCCTGACGTACTTCAACTTGTGTTG
AACCATCCAATCGAACATATGATATTTTCAAAGTATCCAGCACCTGTTCCAAAATATCGA
GCATCTGAGTAAACTGACTAAACAAAAGGATCCTGCTTCCTTCTTCTTTCATTTTAGGAA
GTAATTCTTTCAACACTCGAATTTTACCTGAATCCATCCAGGGATCATCCTTCAACGTAT
ATGACTGCAGCGTAGGGAAACTGCGGCAAAGTCGATGCAATTCAAAGTCAGACATAACTT
CCATATCTTCATATATATATTGTTCATTGGCATTTTTATATTGTTCCTCTTGCATTATAT
CCTTAGCCATTTGCTTTAACTTCTCATCGTCATAAAATTTGCGAAAAAGTAAGGCATGAT
TTGCAGCTTTGCGAAGCTGCATGAGAACATGACCGGCCGATAATGACTTGCCATCGCTTT
CTTCATCGTTCTTACTACGCTTGTTTCGTTTATCGTCTCTCCGAAGTTGTTGATTTTTTT
GCAAAGCAGCATATCGATTGTAAATTTCCAACTGGTTTTCTGATAACTTACAATGTTCAA
TAATCTGAGTCTTTTTTGGCAAATCATTAAGAACTTGGTTTTTCCGACGGCGAAGGACAA
ACGGAGTCATCATAGTCTTGGCACGGCTAATACGTTGCTTAGAAAGTAAGGCTTGTTCTA
TATCCGCATCTGCGGTTGGTTTAGCTTTAAAAATTACATCCAAATCGTCCATGTCACTGT
CAAACATATTAGGAAGAATGAAAGCGAGCAAGGAAACTAATTCTTTGAGATTGTTTTGTA
AAGGAGTACCAGTCAGCAGCAGTCTAAAGTTAGCGTTAAGGTTCATGAGATGTTTGTAAC
GCTCCGACATTCTATTTTTCAAATAATGACCTTCGTCGTAAACGCAGACATCAAAGTTTT
GATGTTTAAGAAAAGATCGGTCCTCTTTGTTGTTCGTAGCTAACTGATAAGTAGTAACCA
AAATGTCATACTTTATTTCGTTTTCTTCTATTGCTTCGCGAATATTTGCTCGCTCTTGTT
GACTTCCGTAGTAAGGTTCCACGCGGAGGCTAGGGCAAAACCGGGCAAGTTCCCTAAGCC
AATTTTCAAGCGTTGAAGAAGGGACTACAACTAAATGAGGTCCGTGGTGTCCTTGTTCCA
GAAGAAGTGCAAAAAAGGCGACTACTTGGCAAGTTTTTCCAAGACCCATCTCATCAGCCA
AAATCCCTGACAGTTTCTGTTGATAAAGCAAATGTAACCAATTAACGCCAACGAGTTGAT
AACTTTTAAGCTGGACGTCACTTGCAAGAGTTTTGGGTTGCTCTGTAACAAATTTAGGGA
AATCACTGTTATCCGCTGCCTCGGTAGGAACCGACTCCATGTCAACGATGTTCAGTTCAC
CATTAGACATTTCTAATTTAATTCCCCACGAGGCCATACCTTTAGATATACGATTACCAA
GAAACTCGCATTTGGCAATTAGATTATCAATTGCATAATATCCTTCCATGGTTTCCATAC
AAGCATTGACGATTTTTTGGCCCATAGGATTTTTTTCACGACGCCTTCCACGTCTACCAG
GTTTGCTAGGAACGTCATCAGGATGTTTGATGATACAAGCTTCGGCAAGTGTCTGGAAAG
GACGATGCTCTAAAAGGAGTTTCGAGTGGGACAAAGGGCAACTAGCAGTATCAGAGAGTT
CCTTAGCAGTACTGCTGTTTATAAAATTGAGTACAGTTCTCTCTAACGCCGATGTATCCC
TGTGAACTATGGCTTCAGGCTCTTCTTCTGAGTCATAAAATTCATCTTCTTCAGTAGTAA
GTTTCTTTGATGCATTGCTAGTTTTTCTGGTATAAGAAGGCATAAGGGAAGCTTGCGTAG
AATCATTTGGCATTTGTATATATTTGTCCCGAATCGAGCGCTTTTGGGATTGAACCGTAC
GGTTAGAGCTTCCATAAGTAGGCATATTGCTAGCAACGGGACTTTGCTTAAACCTTTTAT
GCTCTTGTATTGGAATACCAAGGTCACAACTCAAATATTTTTGAGATAAAATAGAAAGTG
CTGCAGTCTCATCCCACTTAGTTTGAGCAAGTGTGTTGATCACCTGGTGAATCGGAGCCT
GGGGAACAAATGAGCGTATCCATTGAACAGAACGAATAATAGCATTAGGAGAAGTAGTGG
TTACAGGAGGAAGCTCGACAGGTGGAGCGGGAGGTGTAAGCAAGGTATTGTTGACTGGTG
GGGTAGTCACGGGATTTGCGGAGGAGGAACGAGATCGCTGAGTAGAGCGTGGAGCAGAAC
GCGCTGTGGAGCGTGCAGATGAGCGCGAGTTTGAACGAACGTAGCTGGGTAAAACATTAT
TGACGGGTTGTGCTGGAGGCTGCGCGGGTATTGCCGATGTAGGATTGACAGCACCGATAG
GATAGCCGTTATTATAAGGGGAACTATAATGTGCATTATAACCACCCTGAGGTATTGGAA
CAGTGCCTGGATAACCAGATGGCATACCAGGCATTGCTGCGGGAATTCCAGCATTGGGCA
AAGACGCAGTATTGTAAGAGGGCAGGGGGTTATAAGAAGGGACTGGCTGCGATGATTGTC
CCACGTATGAATAACCAAAATTGTTGTTGATTGCAGCGGGAGCATCTCTGGAATAAGCAT
TGGACATTGGAGTCGACGCATACGAAGAAGTTTGCGAATAATCAGTATTCATAAATTGAG
TGTTCTCAGAAGTATTATACATTCCACCACCCATGGAATTATTCACCCCGTACATAGCGG
AAGACTGTTGGACAGGGGGCGTACCATAGCTTTGAGGATTTCCGTATGAAGAAGGCAAAC
CTGTTTGCGAAGAACCATAAACTTCCGATTGAGGATTTTCGTCGGAAAACTTTCGTTTCC
CGTTGTCCGATAAGTAATTTGAATTGTAAGGAAGCATCTAATTTAAAATCACATTAAGTC
TTCTGTATTTATATATCAAATATCAGAAGTAGCACGTTTGGTTCGTGTTTGGGGCGTGCC
TGACTCTTACGGGAGTACGCAGAAAAAAAATAATGGACTCTTTAAATCTGGATATGTCTT
AAGTTAATTAAAAAAATTTACTGGATTTTAACGGTAATTATCGCAATGCCGTATATACTT
TAACCTGTCAGGAATAGTACACTACGCTATGCTACACTACGTTGCGTATCACTATATGTC
ATATGTTGGAATACTAGCTAAGATCCGTTTATTGATAATCACGGGTAACTATCCGTCTAT
ATACATAGATACCCGTTGATAACAACTATTTAGAAATATTATAAATAGCGTTACAACTGA
ACCTCGTTCCTCAGTTCAGTTATGAGCTATATTAGTGATAGGTAACATTATAACCCAGTT
AATACAATACCTATACTCAGTTGCTACTTATACAACCTGTGTATTGTAATATAATAGACC
ACAAGGAAAACTCACCGCAGTTCTACGTATCCTTAAATCAGATACCAAACTGCGTAGCTT
ACATAACCTAGGCTTGATCTTATCGTTATATTAAATGCTTTTTATTACCTCAAAAATCTA
CTTCAACAGTTTGATTTCAAGCTAAAATGGTAAATTTTAATGCATAAAATATACCCATTG
AGTAATCTATTTGCTCTTTTTTTTATACCGCTCGTCCGCTGATGAAAACGTCAACATAGC
AATGCTTGTATCAAGTGAAGATGGATGGTGTGAAATCACTTGTTATAACAGAGGAGTAAT
TGAGTATTGCTTTTTTGATCACCACTGTTTGATACACCCTTGCCTGCTAAACAATTCAAT
GTGAGTTTGTAAATTGCAGTTTTATTTATGATCATCGACCAAGCCCTAACATACATTTGT
TACTCGATTTAATTTAATTAATTTAATATTTCAACAAGGAACTATGAATTTGGAGACTTT
GTCGCCCAGGTATTTTATTATATGTAAACACAAATTAAGCAGGTCGCACGTATAAGTCTA
CCGTATGTTATAAACAAAGATAATAAATTTTAATAAGATGACAAATAATTTCAGGGACTT
TCAACATACGAATATCAATTGTCTACTTTTCATGTTGACAAAACTTTGACCTCTTATAAA
GCAAGGTCCCAATAAATTAGGTCTCCACCACCATCAACAACTTGCATTCGTGATTTAAAA
TGGAAAGGAAATCCCAAGTTTCAGATACAAATAATAACTCTATACCTACGTAAGTTTATT
AATTATTAGTTTATTTCTTTACGCCGGACTGCGAATTGGTTTTAAGAAATTCCATACAAC
CTTCCACAACAGTCTATAATCTTAGGTCTCTTATATTGTTTATTCCTTTTATATTCTTAA
CTAAATATGTTGGAAATGAAAACTTACTAACTTTCGTAATAGTAATGTTCTGCTTAAGTT
TGTGGGTTTTAGTGTCGCATTATTTACATTACCACTTATAACTTATTTTTGGACGTTGAA
GACTTTATTCAAAGGTATATACTAATTGTTGAATAATTTTGATTTTTACTGATAAATTTT
GTTTTAGGATATCAAACATTGTACGCAGGATTATCTGCAGCTGTAATGGTCAATATTATC
TTGGCCTTGTATATAGTCGCAGCCTTTCGCGAAGACTCCGGGACTCCCAAGAAGGATATA
AAAAGGGAATAATAAATTTTCAGTAACCATTTTACTACTATTTTGAGTTATGACTTTTGC
ATTTCAATTCTAAATCAAATTTTGAAGCGGATTTTCCTTCTGCCAACGTATTTAGGTGAA
TCATTCGATGTCTTTATTTTTTTTCGTTAAAAGTATCGCAAAATGAAAGACTTTAGCTGG
GACTATCCTATAATCTACTGGATTTTGCATGTATGTCTATTGAATAAGGTGCTACCACAA
AGCTGTTGCTGGTGATACTACTCCTTTTTGTATCTGAATTAATGAACGGAAATTTTTTTG
TTTAATTTTTCGCTAGTCTGTAATGAAAATATGTGTCTGTTCTTTAGTTTTTTGTAGTTT
CCCAAAAAACACGAATTAGCAAAATGCAATTGATATGGCAATTTCAACCAATTTTATAAT
TAAATTTTCCTTTTTATAATATAAGGCTAACATGTATGATTCTTATCAAACATAACAGCT
GTAGGAATTCAGTATTCTTCTAACACTTATGCATCACTATTTTCTCTCACCCCAAACCCC
TCGTATATTGGAAAGTTGTTCAAGTGAGCATTATTGATTTTTTCCCAATATAATATTGAT
AAAAATATATATCTGTAAAAAAGTTTGGTGTTAATTATTTATTTTATTCTGTTTTCTGCT
GATTCAAAGACTTCGAACATGTCGACTGCCAGTGAACAAGCTCGACTTAGACGTGAACGT
CGACTGAATAAAATCAAACAAGGAGGTGCATCTAGAATCAATCAAATTTTGGGACAGAAT
TCAGATGACAGTCAATCCGATGTTCGAGCTACAGCTTCCGAGGAAGCTGTACATTCTGAA
ACTGCAACACCAGTAACGCCAATGTCTTCAGGATTCATGGAAAAGAGAGATGATACCTTC
AATGCTGATCAAGTGGAATATCTTCCTTCCCAAGATTACCATAATTTGGAAAGTTCGCCT
TTTAAACTTCAGTGTGATTCTCCATATAATGTACCACCTGAAAACATGTTTAATCAAAAC
CCTGATTTTGCAAATTTTTTTCAAGCTATGTTACAATCCGCAAAGGAGGGATCTGATACA
AATTTTCAAGGTGAAAACGAACAAATTCCTCAAGCTACAGCTCCTTTAAAAAACTTAGTT
GAGAAATATGCTCATCTTTTGGCAATTTCTATAGTAGTGATTGTTTGTTATTTTAAACAT
TTGGTAAGTCCTCATCTTCCTTTTTTGAAATTGTTTTTTTGCATACTAATATATTTATTT
CAGCCATTACTTCCGTGGACATTTACTGTCGAAGCTTGCTTGTTCTCTATTCAATTTGTT
TTGGACCGTAATAATGGACCTTCTTATTCTCTTCTAGCATCTCTGGCCTCTCAGCTTCCC
CCTCCCTATGGAGCAATGATCCGTCATACAACAAGTTATGTTCCGTATTTCACACAATTG
ATTACAGATGCGTGTATGACAATATTTGCGTTAGGTTTATGTTGCTATTTTTATCCGTCG
TTGGTGTATTAATAGTTGTTAATTTTCAGCATTTACTATTTATGAATCTTGGTTTTGCTT
CGCAAATTGGTGATCGATTAATTAGCATTCAATTTTTGTTTAGATGAAATAAACTAACTG
ATTAAGCGAGAAAGACTTTTCAAACCCTTAGGAATTCAATTTTATATTATCTTTTCAACA
TCTAAACGATTTATATTCTAAAACATACTGCACTTCATTTGAACTGCTTTGCAACACATG
CCATATTTACGATTGTCGGTACGTTTTATTTATTTTCTCTTTTAATTCAATGGTAGCAAT
AGTATATGATTTAAAAAGCTCTGTTTATTGTAATTGTAGTATTAATTAAAAACAGACTAC
TTAAAGTAATTTCTGGGATAGCTGTGAAAACATTATAACTATGATTTTTAAAATCTTTTA
TCAACTTATTATTGAAATAAAATAAGTAATTGAGAATTGGCTTGGTTGACTGTATATATG
TAAAACAACTTCGTCCGAAGCGCTACAACAGCATGCAAACGTTGAAACGGCGAATTCTTG
TTATAGAGAAATTTTTCATATAAAACCATACGTACATATTTTGCTATTTAAGTTCCAGAT
TGCTTAAAAGAAAATTGAAGTGGTAGCACCATTTTTATAAATATATGCAATGGAAATGAA
AAGGCGCGTTCGCGCGGTGCGTCGAGACCAAATTCAAAAAAGATGGCGTCCATTAGAGGA
TAAGCAGCGCCAAGAAATAATAATTATTTTTAGGACGTGTTCAAGGTAAGTAATTGAGAA
TCATGTTATTGCTAAAAGTGCTTGTGCTTTTTAGCGCTTACTTGTGTACTGAAAGGGAAA
TCAAAGTTTGCTGTTGATGTTTACCTGGAAAAGTCTTTTAAGTACTTTTCCAAATTTTTT
TAGTCATTATGTGTACGTATGCTAACTGTGCTATCGTAACAGATTGGTTTTGAATACAAT
AAAATCAGAAACAAGAAAATCTTTGGCCGAGGAATGGTTCATGAATATACTTTTAAAAAT
CGAAGCTCCTCTGAGAAATTTGCCTGTACCAAGGAAAAGAAAAGAGTCAATACTGTTCTC
TCAATTACTTTCTTCGAATGTAAGTTATTAAGTCTTGATACGCATACATACGAAAGAGAT
ATGACTAACATTTTTAGATGCAATTGGAACAGCAATTATACAGTGATTTGGACCATATTA
ACGTACTTCAACAGGAATTGAAGGTTGAAACTGCTCGTTTGGAGAATGAACAGAAATCTT
ACGAAGAAATGAAACAAAACATGGCCATAAATAATTCACGGCTTGCCGATTTAAAATCTA
AAGTAAGTTTAAAACACGAACAGGCGAATGTTTTATTCAAGACTTCATCTTAACATATGA
CACAAAATGAGTTTTCCATTGTTTCAGTTATGTAAATAATCAAGCAATCACTAATATTTT
CTTAGCTTCACCCTTATTTGAAGAAAGGCTTAAAGATATCCCATGATAATTTTTCAGACT
CCAACGATTTCTCGTTCCAAAAGAAACTGAATACAGAAGATTCTAATACTTCTAAAACCT
CTACATTGGATATGTATAAAGAAAAATTAAAGCCATTTACGAAAACTATGCAAATCCATG
CAAATAAAACTGTTCAATTAAGTCAAACTATACAAAAAGCTACTCTTCTTTTACAACGAC
TAAACAATACAAAAAATATAGGCCTAAATAAGTCATCCAAACTTAAGATAAAGAATATCT
AGACATAGAAAAGCTAGAGCTTAAGACTTGATGACTTCTACATGTTAACATATAGTCCCT
GGCCCCGAACCATGACCAACCCAAAAACTGGATTAAATCGTCCTTTAATATAAGCACTCA
GACTAATTGTCCCGTCTTCATTGAATTCTCACAAATAGTGTGACGACAAGCCAACTTAAT
GGAGTGCTTGGTAGATTCCAGCAGCTACGGACTTAATTCAATTAAAGGACTTTTTGCTAG
AGTTTAGGGTAGGGTAAGCATAAAATTATAGTAGCATTATAGTATCGATTTTGAAAGTAA
TTTCTTTTGCTTTATTTAATCATTAAAAGATGCCGTAAAGGATTTTGTGCCTTGCGGAAT
TGTCAAGAATTGTAGTATTACTCGTAAACGGTCGTGATTGTTATTTAACAGTAGTAACTG
CCAAAAAAGACTTAGTTTTTTATTTTTAATAAAAGCCTTCAATATTATTTAATAAATAGA
CGCAAAATCATAAGCAAACTGATTTTAAATTCATTTGCGCATGCAGTCAATAATTATAAA
AGCAAAGCAATACACGGGTCTTAGATAGCTAGTCAAAACAATAGCAATGCGTAAAAAAGT
ATTGATTTTGATTAAAACGGAAAGTTCATATAGGAAGCTGAGTATGACTTTCTAAATGGA
AAAGTTCTTGAACCACAGGATGAACAAACAACACATATAGCTCAGAGATGCAAGTGCCTG
AGACAGCTAAGCAGAAATAAGTCCATGGAAAACTTTGAAAAACATAAAATAAGTGAATTG
AAAGGAACAAATAAATAAGGTATTTTGACAATGGACAGAGAAATTTGTTTGAAGATTCTT
CCTTTTTACACGAATACAATTGGTACCAAGCAGTTAAGATCCCTGCTTGAATTGCGGTCG
TACTTTGGATAATTGCGACCAACAAGTAATGTGAATCTGTAATTTTGTATGCAATAAAGC
AAGGTATCAAGACAGCAATGTTTGGAATCACTGTTAAAAACTGACAGAAAAGCAAGTACT
CCTTATGACCCCATGAACGTTCAATTTCAACGCCATACACCGAGAGAATGAGAATACTTG
AAAGTAGCGTAAAAACATTAGCATCAACAAAACTTGTGGTAATTATTGTCCATGGAAACA
AGAACAAAGCATTTGGAACCAAATGAAAACATAAAAGAAAGAAAGTTACAATAGAACTCC
TACCAAACACTTTGATGTAGATGCTGATTCCAAATGATATTGCAGAAAACAATACCTCTA
GGATAAGAAGCCTTTTCGTAACCGAAAACTTGGAGAAATGATTCATTGATAAATTTTAGG
TAAAAAAAAATAGTAAAGTTCTCGTTACCGTAAAAATCATCGACGTCAACAATTTTGGTC
TCAAAGTAAACAATACCAGGATACCTCTAAGTAAATGGTGCAATCCGAAATAAAATTTCT
AGCTGTTTGCATCTAAAAAATAGAAACTCTTACGAAAACTGAATTGGCCAAAGATCGCTT
CACTGGAATATAAGCATAATAAGAAATTGCCTATATGGATTAATACAGTTAGTAAATTAG
AAAATGAGAAGTTGAGATAAGACACTGCACCTGGTTTTTTAATGCCTTCTCAATAATCTC
ATTTACAGGGACATTCGGTAGCGGGTAAGATGATAGGTAGGTCATGGCTCGACCAGATTA
TAAACATCCAGAAAATTACATAACTTTGTAGCTTGCCGATTCTAATAGAAGATAGAAAAG
AAGTTTAAACTCGCTGATATATTTGTTTGAGCACAACCTGGTTTATCAAGTAACTATGAT
CGGTTCGGTTGAGGAGATAAACGCATTCAAAGTTAGAGTAAATAGTAAAGGGAGAAATTA
ATTTTTATTATATTTGGCAGTTTTTTGAGGGAAACCCTGATGAGAAATTGCTGCATATCG
CTCTGCTGGGTTAAAACAAAGTGTTGATTCTCTTAATCGAATAATGTCTTAAATTATTAG
TCATAATTCAAATCATCTTTTCCTTTCTTAGAATATAGTGAATGCATTGTTTAGAGCGGT
CTTATATCAGAAAGAAGCATTCGCTTGACCTTGAAACATTTGTAATAGAAAATCACATTT
CCTTAGCATGATAAGCGGACCCTGAATGTTCAAATTATTCAAATAAAATAGCAGTATATT
TTAGAAATAAAAAAACCAAATAAGGCTCCTACCACTCTTGTATGGAATGTTGAGTACAGA
AATAGCATACGAATTCATGAAAGTCAGAAAATACAATCTGGCTGCCAACTCCTTAACACA
AACTTCTAAAAGTGAATTTTGATTGAAATTAAAAGTCGAAGAGAACTATTAGCATTGCCG
TTTTAAGTTGTTAAGAGACCGACTTCAAAGAGGGAAAACTTTACTGAAATTCCTCGGATA
CAAAAAGTGGGCACTCGATTATTTTTATTTTGATCAAGCGCTGTTTAAATAGTAACCTAC
GTGCAAATAATAGAGCAGGAAGATTTAATCCACAGTTTCAGCCATCGCACGTATCTAGTT
AAATTTCGGTAACTAATACTTCCACAACTACTAAAAACCGTCTCAATGGGAATTCGTCGA
CAATCCTTCAAGTTAAATCCGTATTGACAGGAAAAGAAAGAAAATAGAAGACTGTTGAGG
TTTTAAGTGAAACTCGTTGACAGACCTTAAGATTTGACTTTAATTTACGTGGGTAGCTTG
AACCATTATAGATTTAGAAATTGTGGAGGAAATGGATACGAATCAAGTTAATTATATAAT
CTGGAGATATTTGAAAGAATGCGGTATGTTAAATAGTTGGTTTTTGTGAATCATAGTCGC
TTCATCTCTCCTTTTTTTCGGTTTCGTTAACATTATCGTGTTTTTTGTTGTAGGTTATTC
GCATACTAAATTTGCATTTGAAAGGGAAACAGGCATCCAAAATTTAGACAAACAATGGGG
AAGTACTTGCCAGGTTGGCGCTTTAGTCGAAATTCTGCAGAAGGGTTTACAGTACGTGGA
GCTCGAAAAGCACTACGTTGATAATCACTCCTCAAACGAAGAAGCTAGCAAAACATCTAT
AGATGGAGAAAGTCTTGTAAATGAAAATCCTTGTAAACTCCCTTTCTATCTCACCGTACC
TCATATATGCGAAACGACACTGACGAAAGCTGACTCTACCAATGGGTTTTGCGAACACAA
TAATTCTAATGATCACCAACTTAAAATTTTACAAGATAAGGGGTCTGGGTCGCCTTCATC
TCCGGTCATGCCATTTAAGGATAAAATTGAGAAAAGGGATATTGACATTACTATGGCCGA
TGAATCAAACGTAGAGAAGGATCCGGCTCGACCTATAGCCGTGTACAACAGTTCACCTGT
CACGGAAATAACAGAAATAAAACAGGTTACTTTTACTGGCGGCGAAGACATAAAGTCGGA
TTTTTTCAAAGTAATTCCTACCAAACACCCCGTTACCTGTGCAGATTGGCGTCCACTATT
ACAAGAAAATTACCATGTTTACGAATTTTCTATTGGTATGACAAACGCTACTCTGGCTTC
AGTTAGCATTTGTGAAGAGCAAAATGATTTCAAGGCAAAAACAGATTATTGTCTGCAATC
TTCTTTCGATAACCAAGATATCACTGGCGTTGCTTGGAATGTAAGGTTCAAATTTTTTTT
TGAAATACTAACTTTTAGAATTCTGGTTCTTTTTTAGCCTACGCATTCTTCAGCGGTGTG
ATTGAAATTTACGATAGTCATGGTTCTCAAATCCTTAGCTTTCATAACAACAAAGGCCCT
GTTTTATCTTTGAAATGGAGCGGTACTGATACATATCTAGCTGCTGGTTCGGCGGATGGA
ACTATTACACTCTTTGATCAACTGAAGCAAACACAATATTCAATTGACACACTTGCATCT
TCCGTTTTAGACATTGAATGGATTAGCTTTGATGAATTTGTAACTTCGGATGTGGAAGGC
TCCTTGCGAGTATACAAGGTCGATGGCAAAGCTCCGGTTTCTACAGTTTCTCATGCGCAT
GATAATTCTATTGTTGCTTTACGATACAATCTACGTATCTCTCTTCTATTAACTGCTTCT
AGTGATACCACTGTTAAGGTAAATTTCTTTTGTCATTCTAATAATTACTGTTTTCTAACG
TTTTGTATAGCTTTGGTCTAGAGGTGATGCTGGTGCTTTTGAATGTTTACATGTTTTTTC
TTTTAGCTCACCGGTTAATTGTATTGACTGGAATTTGCGGGAAGGGACACCAATTCTAGC
GGTTGCTTCAAACAGTATCGTTTCTATGTATAATGCTATTTCCCTTCAGCAACTTGCTGT
ATTCATGAGGCATACAGCTCCTGTTAGTGCTTTGAGCTTCAGTCATAACGGTCGCTATCT
TGCTACTGGTGATACTTCTGGGGGAGTATGTATATGGTCATGCAAAACAGCCAAACTATT
TAAGGAACTGGGTTCCGATAACTCAGAGTTAATTGCTGTTACTAATGTACTTCCAGAGGA
GCAAGTTAATTTCTTACGGTGGAGTTTTGATGATAAAGATTTACTTATCGGTAAACAAAA
GAAGGAGATTATTTGTTGTTGTGATTTTTTACATGATTCTCTGTAATTGAACCTAGTTGA
TCTTGTATATATCCATTTATTACAGTAGGTTCGTTGGGTCATCATCTATAGTCAAATATA
TACATATATATAATCATATACGAATTTTTATTTGAAGTTACTAAACTGGTAGCTAATATT
TGTCAAAACATAATATGAACAGGAAACAATATGGACCGCGAAATTGTCAAGGTCCAATAT
CTATTTATCACAAATACCTTAATTATAGCGACGCTTTCGATTGCCATCTTGAAAGTTAGT
AACAGGTATAATAGATAGCGTGAACGCAAATTAGTGGCTTCGTCTAACATAAATCAAAAG
GAACATTACTATAGGTAAAGATAAACCGTACGTAGATCATTAAAATTCAGCAACGACTAC
TTTGGATCTCATAAAATTGAACTTCCAGAAAGAGACGTGACTTGGGAAAATACTGTCGGT
TGTTGCGAAGTGTCTATTTGGAGTGAATCATTTTCATGGCGTACAATATCAATCATCTTC
TTTATTATTGATTTTTCCAGGTCGGTGCGGTTTTGAAGGACTGCTTCAACCAAGGACAAA
GGTGCATCCCAGTATGCTTCTTTCAGCAAATGAAAGTATTCGGAGACAGTTTCCACATCG
GCGTCTAACATTCCCAATAGTAATTTTTCAATGGGCTCAAACGTAGATCGCAAATGTTCC
GCAGCCATGTATTCTCCAAACACCCTTATAGCTAAAGCAATATCAGAACGAATTTGTTGT
ATAGCATTATCTCCATCGAAACATGCATTCTTGTTAAATATACTTCGTAAATAACTGATG
GTAAGCGCATTTGAAGCTTCCAATAAAAAGACATCGAATAAACCGGGAACCATATGTTCG
ATACAATCAACGATATAATCCCTAAAGGTGTCAACAATAAGCTTCATATTGCTAGATTGA
TACCAGTTTGGTTGAAAAAGTGAAGTGAGAGCGGGCTTAACGTCGTTACTTATAATGGCG
ACAATCTGGCTGACGCCAATATCGCTAATTAATATATACCCATCAACGGTTTTGCCAAAT
GCTTCTCTTAAATCTTCCTCTCGTTCACTGGTAATCAGTTCAAAGGTGTTGAGCAAAGTG
TTATCCATAAAGCCAGCACACTTTAAATTATCATTAGCTACTGCAAGTAAGTACTCCATT
AATCCTGGGGGAACTGATTCCGGGTTGCCAGATAATTGCTGTGAAAGTTCGGAGCGCATA
ACTGATTTCCATTGATCCTGCATAGATTGCATAATATACATAATTGAACTTAACACGATG
CCGACGACGTCAGAATTATTAGTATGAGAAATAATATTGATTTGTTGAGTAATCATTTGG
AAAAAGATGATAGTACCTTGAAGACCATAGTTTCCATCACTATCTAGTTCAGGTTCACTT
TCACGTTTCATAAATGTGTCAACGCTGCTCTGGAACAGTTTATCAGACCATTCTCGTATT
TTTTGAGTAAAAAGTCGGGTATATTCTCTTACTAAAATTCCGTCTTTTCCATCTTCAAGA
CCAGGTTCCACCTCATCGACCGAAAAAGGAGCATTTTCTTCGAAAAATTTCCGGTACTCT
CTATGAAAGTTGATTAAATATAAATAAACGGCAGCCGGAGTATCTAGTGAGACTGCTTTA
GTTACAAGGCCAACAAGACACTCTTGATAAATGGAAGCAAATGTTTTAGCGATATTATAC
GAGGGCGGGGTAAGATCAGGTAAAACGTAAAATGCAACTTTTAAATCTTCAAAGATGAAA
TCTAAGTTCAATTCACCGCTACCGTCCTCAAGGTAAGAAACCCATGCACGTTGAAAGTTT
TCAGCGGCAGCACCTTGAAACTCTTCAAGAACACGTAGACGAAAGTTTCGTAGCTGACGG
GTCATCCCTTGCAGACTTAGAAAAGGACCATCTTGGGAGTCCGGTAGGCTGGATTTAGCA
TCGCGTATACTTTTCAACACTTCATCAGAAGATTCTTCAGCCTCGACAATTTTGAAAATT
TGAACAATGGTTTTTATATGGCCACTTTTGACGAGTTGGAAAATGTTACGGCAAAAATTC
AAAACCAACCGATCGAAATTATCAGATAGAGTGTTTAAATTAGAAAAAGAATTCTCTAGG
GTAATTGGAAGATCACTTTGGCCTTCAAGGGATGCCTGGTATAGGGCTTCTTCACGGAAT
TCTCGAAGCTTAGAAAGTTTATAATGGGCGCGTAACAAATTTGGCATATCAGAGTCAAGT
TCTAAATCTTCACGCAACATGTCTTCTATTACATCTGTCTCCTTGACTAAATTATTTAAC
TGCGATATCATTTGTTTTGTTGCATAACAATTTTTGTATATCCGAGACATGCGACTGATT
AACGGAAATTCATCGACCATCTCGCGTGCACTCTCACATAAAGTCAACATCTAAAAAAAA
ATCAACATTAGTAAAAAAGTCTTTTAGAAAATGTCAAGAAAGCTTAAGCTTCGACTTTAC
TCACGTTATGCAATTCCTGAAGAAGCTTCACTCTTTTCGTTTGAGCATCATGCAGTGCCA
ATTTCCCCAACTAAAGACGTAAGTTAGATCAATTACAATTATCGCATTAATTTAATATTT
GTGCTAACCTCAACGGCTTCCACGTGCTTTTCGAGCTCCGTTTTCACATGCATATTAAGA
GACGCTTGCTCGCGTTCAAATCGCTCAATATGAGTAGATAATCGATGAAAATCCTAAAAT
CATCAATTGTTAGCTTTCGATCTTAATTCCAAGCATCCTAACAAGGACCACTTACCTCAC
ATTGTCTAAGAATATCCGCTACCCTGACAAAGTTAGAGTAATCGTTTCATAAATGGTATT
TTGATAAATAATCCTTACTTGTTATAGACAGCATCATCCGATGCGGCAGCGGTCATTTTC
TTAAAGTTATAAGCAGACCTAGTGCTTACAAACGTTTCTATTTACTGACAGATTGATTAA
TATATTTACGGACTGGTTGTAAAGGCAGGCAGCTTTAAAGCATTGCAATTCATTTCCGTA
AAACAAATAATTCTCTCGTCAAACTTCCTTAACTAATTTAAGAAGTTTGTACAGCATAAA
TTTTAATATCAAATTCACACTCGTAATAAGGTGTAAGGAAAATATTCGCATTGCTCTATT
TTTATAATATTTAAATGATAGATTGATAGAATAGTATAGATCTGAGCAAGGGTTTAAATG
AGTATTTAGCCAAATTTTTTGTTTTTGTTATCCAAAAATAGTTAGCATACCTTTTTACAA
AAATTTAAATAATTGGTCCTGTTCGAATTTACCTATAGTGTTCAAATCGTCTACGAGGCT
CATTTAAGTAATAATATATACTTTGTCTCGAAATCATCCTTCTTCCCTATAATCCCAGAA
ATCAGTATACTTCTTAATTGACAAAAAATCAACAGGAATTTCTTTTCTTTTAACATCCAA
TTAATAAAGCTCATAATGTGAATTAATGGATTACGTAAAGCTTCGGTATCTGATTTCTTC
AAAAAGTGAGATTTTTTCCTGATAAAGTAAAAAATATATATATAATAGATTATTTGTTAT
ATAATCTTCCAATATTCATCAACTGATTGAGGTATAAACATTAAGAGACTGTAGCTAATC
TCCGATTTTTCTGCTCCACTAATAGGATAATAAGCTAGTAATTTGAAGCCTTTGGCAAGC
CAACCACAGCCTATATTATTTTTTTAAAAATGTATGTCACTAAAAAAAACAGTTTTAACA
TTTTTTTGTAGGAATGCATCAGAAAAGTTGAGCCAAAAGGCTGCTCAGTCGGTCACAAGA
AGGTTTATTACCTGGTTGAAAAGCCCTGATTTCAGAAAATATTTATGTAGTACTCAGTAA
GTAGATGGAAAGGTTTAAAGATTGCTATCTCTCGTTTTTTTTATATTATTTATGGTTTAA
AAGATTTCTTTGCTAATAAGATAGCTTCTGGGGTCCGTTGTCGAATTTTGGAATTCCTAT
TGCTGCTATTTTGGATTTGAAAAAGGATCCCAGGCTTATTTCTGGGCGCATGACAGGTGG
TATGTGTTAAAAAATAGTCATATCAATAACTTGGCCATGACAATGCGGTTTTGGGGAAGC
TCTTTTAGAGATTGGAGTTAGTTTCCTTTTTTCCGCTGATCGTGGTTATCTCTGTTGTCA
ATGCAGTTATCGAGATGACTTTCTGTATCGTTTAAAAGTTGCTTTTTTGTTAATCTCCTT
AGCACTTATTCTCTATTCCAGCGTCTTTATGCGTTATGCCTGGGTATGTTTTGAATCATC
TTACTCCTTTCTCCAATATTTGATAGAACTTTTACTAACTAGCGTTTAGATGGTAAGCCC
ACGTAACTATTTATTACTCGGATGCCATGCCTTTAATACCACTGTTCAAACGGCACAAGG
AATTCGTTTCGTCAACTTTTGGTAGTATGTGTATTGAGACTTTGTTATTCTATTGTTTAC
TAACGACTTATTTAATTAGTGGCAAAGAAGGTGCTTCTAAACAATCTGTTTTCGAGAACA
TCATGCAAGCAGCCAAACATCCTGAAAGTGGCACTCGTCAAAAGTGAAAAGGGTCAAGTA
TTTATTCTTTAAAATACGAGTGAACGGATAAGTCACTTGCTCTAACAAAATTGATTCGAA
GGAAGGGTATAAATAAGCAAACCTGAGAAATATGTGTTATCGGTTTATTACTTGCTCTAA
TATAGGAAAAATTCATTTTTCCTATTTAGTTTAGGATTTGCAAATTTTGAAGTCCGTCAT
TATTTTGTTAATGTACATTCTTTTTTCTTTTTACAAAATGTCTTTTTCTATTTTACTGGT
CCGAGACGTCGTATCCTTGTTTTTTGTGGAAGCACAACTAAATTGTTTTGATAATATCAA
CAATATGTTTTCAGGCAAAAGTTGTCACGTGGAACGATATTTTTATGATTGTGGCTTCTA
GTATTCTGTACTTCTTAATACAAAATATTAACACTATTATATGGTAGCACCATGGCGTAC
TAGTTTTCTGATTTGTCGGTTACTGAATATTTATTGAATATATTGATAACGGTAAAGTCA
CTTTTTAAAAGAGCAAGTTCAGTTACACAATCTAGCTTTTACTAGGAAAAGTAGTTTCAA
TTACTTTTTTAATTAATTTTGTGTAATATTCCGATATATTAGATGTTAGGCTTAAAAGAA
ATCGAAAATACTAACAATTAGGGAGGTCATTAGTGAAAAAGAAAATTAAACAAAATATAA
ACGATCAACGGTAATACGTGATCACAAAATTGAAGGTCAAAGCATTTCATCACCAAAATT
TTTAAAGTTAGGTGAACATGATCGGGAAGTTCAGAATAGCTTTCACATATTTTACACCAG
AACGCCAAATGCTTGTAATTCTATTTTTATTTTATCAAAAAATGCTTCATTGACAGAGTT
TGTAGACACCGTATCTGAGTATTTACGGATGGCTGTTTGTAAATCCGTAAGCAAGAATTC
CAAACGTAGCAACAATAATGAAGGATCCTCTGATGATTCTTCATTGATATTTTTCCAAAT
TTTTTCAAGATGAGAGATGTGCTCCTTATGCACGATTTGTTGATCAATGCCGTTATCTTT
TGTGTTGTTTAAGAGCTCTTTTAAAATGTTGAAATTTTTCTCAAAGTCTGCACAAACAAT
TTTGTCATTATCCATTGGATCTATAGAAGACCAATCGGTCTGAATTTTATTCTGATTAAA
CATACACAAGGAAGTTAAATCGGTTTGCTTATATAACGAATTTGAAGCTGAAGAGCATGT
CTCGGAAGCACTATCTCCAAAATATGTGGAAGAATCAGTATCGGAATCGCACTTTAAAGA
ATAGCGATCGCTTCCACTTTGCTCATTAAAATAAAATCTCTTAGAGCAAGTTTGGTCATC
AAGGTGAGATTCGAAATTTAGTTGCTTGTTTACATTTTCGGAGTAGTTAATGTCAATAGC
GTGTTTCTCACAAAACGAGACAGAACCCAGCGTTTGGGAATTATGTACATTTTGCTTTCC
TAGAACTGAAGAAGATCTATTGGAAAAGAAAATATAATGGAGCAACTGCTTGAATTTATG
GGTACGGGTGTTTCGAACGCTAGATGAATTTTCAGAAGAGCTTAAAAAATGTGTCAGTTT
GCACTGAACTTCACTCAGTCTGTTAGTGTTTTCGTTACTGAAGAATTCCAAAGAAGGGGT
AGCGGAGGTCAAGGTGCGATAGGTATGTACACGTTCCTTCCTCACTTGTGTAGTTGGATA
ATCAACGAAAGTGTTTTTACAGATCATAGTGGGCAAAATTATTGAGTCCGAAAAAAAATA
ATGAATAAAAGTAGATCCGACAAAAAGCTGGCAAAAAGAGTTAACAAAAATATTCCCACT
TTGTTTTATTAGATTATGTGTATGAAAAAATAATGCAGAAACCTCAAGGATATGTATAGA
ACTGTATCACCAAAAGAATCATATAATAGTCATGCTTTAAGCCTCTTCAGTCTCTTAAAA
TAGACCTCTTTCTTCAATCAAGCGAAGAACAGTAATTTTAGCGTCTGTAAACTCCACCTA
CTGAGATTTCAACTTACGATCTAATATTTACTCAACAATTTGTAAAGTCACTTAGTAGTC
ATTCGTTCGTCTCGGGCGCAATTCTAAACCACTTCCCGGAACTTACGCCTCTTTGGATTG
TGATGAAATTACACAAAACTCCAATCATGCTGATTCATGGTTGAGACAGGATGACTGAAT
GAGATGACCTTTCTGACATTTTCGCTAGTTCATTTGAGACAGTCCGATGACGGATGGAAC
TTTGAGTCAAAGGAAAGGTTTCTCATGTATCTCTTTTTCTTCATTAATTAATTACAAACT
CATCTCTTTAATTGCCAACAATTCACACGATAATAGCATGAAAATTCAATGGTCACTAGA
AAGTTAATATTAAAACAATCATTATTTGCTAACAACTTCTGTCTTCAGTTTGCTACCTGA
TATCGTTTAACAGTAATTCTGGGGTAAAAGGGGCTGTAAGGCGGTGAATTATTTTATTGG
CTCAAATTTTTAATCATTTATTATAAACTACTTTGATTTGCAAATTTGGGCCAATAGTCT
AAAGCTTTTTCTTAGGAGATTTAACGATAAGGTCAATCCACCAATCATTTTTTGCTAAAC
TACGTTTTGAGATATATTAAACTTGAACGTTTTTGCACTAAGTGCGGGGTTATAATTGAT
GAATTAGCTAGTTGTCTGGTAATGACAGAATATGACAGTCAACATCTGAACAGAAAACGA
TTAGGAGGCTTAAAAAAGATGCCATTTATTTTGTATATAAAGGGTAAAATTCAAACACTC
TTCCTTCCATTAATAATTTGAAGCTTACTTGTAACAGCCACAAGGATATTTCTCATATTG
ATTTATACTAATAAGAGAAGTACCCTTTATCCCTCCCTATTTGAGTATTGCAGCCGTTTG
ATAATCATTTAAAATACGATTCCTTCGTTCCGCTTATTTTGTTTTCTATCATTTTTATAG
GAAATCCTCCTTGAACATTTTTTTGATTTCGCTGGTCCCGCTGTATATCTCTTGACTTTT
GTCTTTTGTGATTTTTTGATATTAAATACTTTCCTCCTCGATTTTCAACTCCGCTATTAC
TGTCTCTTTTAAATTCTTTCCCTTTCTTCCTTTTAATCTTCAAAACAAAAATACTTTCTC
TCTTTTTCTATTAAAAGAGTGAATTACTATTTTCGTTTGTTTACATCCCATTTTTCTCCA
CATTATTGACACTGTTTGTTTGTTTTTTACTCCAACATCCGATAGTGACAAGCCCCCTTT
TTGATTAATCGTCGAATTTTTTGGAACATTGAGCGATTATCCTTATTGTTTGTTTACATA
ATTTGTTGACTTTGGTGTTTGTTTATTAACCAATTTTTTTCCTATAAAAGCGGTCCTCAC
CTCGGTACTTTTCTTCTTTCTCTATATTATATCTTTTGAGATTTTCTATACAGACTCTTT
TAACTTGGGAAATAAAGACTATCCTTTCATTCCTTAAAGAAAAAAAGTCCTTTCTCTTCG
GTATTCTTATTCTCTGTATTCTTATAAGGTTTATATACATATAGCGTTGTATTATTAAAT
ACCAAGGATTCTCTATACTTACTCTTCTATTCTTTCCTTCTTTCTCTAATATTACTACAT
CGTTGCGATTAATATATTTATAAAAGCAACCCGGAAATTTTCTTTTTTTTCTTTTACTTA
ATCAGGACTAAAGAATTTTCTCATTTGGTCATTACTTTTTCTTTTTAAAAAAACTAGCAT
TTATTAAGAACAATGGCGAAAATCTTAACCATTGTCATGTTGGTCTTCGTGTCCATGGCC
GGATGGATGTTCGGTGCTGACACGGGTTCCATTGGTGGTATCACTAATATGCGGGACTTT
CAATCTCGATACGCAGACAGGTATGATCCTGTCACAGATACGTATTCGTATTCTTCTGCT
CGCCAAGGTCTTTTGGTTGGTATGGTTAACACTGGAACTACTGTTGGATGTTTACTTTCT
TCACCTCTTGGAGATCGATTCGGTAAACGTAAGTGTATCATGGGATGGACATTGGTTTAC
ATTACCGGTGTTATCGTTCAACTCACCACAATTCCATCTTGGGTTCAAATGATGGTAGCT
AAAATTTGGACTGGTCTTGGCATTGGTGCTTTGTCAGTCATTGCTCCTGGTTACCAATCC
GAATCTTCTCCCCCCCATATTCGTGGTGCCATTGTAACTACTTATCAATTGTTCATTACT
CTTGGTATTTTTATTGCCGCCTGTATCAACATGGGTACTCACAAATACACCACTCATCCT
GAAGCTCAATGGCGTGTTCCCATCGGTATTAACTTACTTTGGGGTATTCTCATGTTCTTT
GGAATGCTTTTCCTCCCTGAATCCCCACGTTACCTTGCAGTTAAAGGAAGAAATGAAGAA
TGTATGAAAATTCTTACTCGTAATGCTGGCCTCCCAGCCGATCATCCCATCATGCAAAAA
GAATACAATGCCATTCAAGCTGACGTTGAGGCAGAATTGGCTGGTGGTCCTTGCTCCTGG
CCTCAGATCTTTAGCAACGAAATTCGTTACAGAACACTTTTGGGAATGGGTGTCATGGCA
TTCCAACAATTGACCGGTAACAATTACTTCTTCTACTATGGTACTCAGGTATTCCGCGGT
ACTGGCTTGAACTCCCCCTTCCTCGCAGCTTTGATTCTTGATGCTGTCAACTTTGGATGT
ACGTTTGGTGCTATCTTTGTTCTTGAATACTTTGGTCGTCGTGGTCCCCTCATCGTTGGT
GGTGTTTGGCAATCTATTTGTTTCTTTATTTATGCTTCTGTAGGTGATCGTGCACTTACC
CGCCCCAATGGTACTTCGAATCATCGTGCTGGTGCCGTTATGATTGTGTTCTCATGTCTT
TTCATTTTCAGTTTTGCTCAAACTTGGGCTCCTGCCGCATACGTTATCGTTGGTGAATCG
TATCCCATTCGTTATCGTTCCAAGTGTGCTGCCGTCGCTACTGCTAGCAACTGGTTCTGG
AACTTTATGATTTCCTTCTTCACTCCCTTTATTAGCAACTCAATTGGTTTCAAGTATGGT
TATGTGTTTGCAGCTTGCAACTTGTGTGCCGCTATTATTATTTTCCTATTCGCCAAGGAA
ACCAAAGGTCTTACCTTGGAAGAGATTAACCAACTTTATTTGTCGAATATTAAGCCCTGG
AACACTGGTGCTTACCAGCGTGATCGGGAAGATATTAAGCAAAGCGACTCAGAAAAGGAG
CGTGGACCTACTTCTAAGTTACATGAATACGTTGAGCATGCTCCCAACTCGTATGCTTCA
ACACACTCTACAGAGAGTGAGAATTATCCTCAACAAGTCACCAATCCGGTTGGCTTATGA
AACTAGTGAGGGAATTCAATTCTTGATGGCTTTATGAATCAAGCACACTAGATAGAGGAT
TTCAAGTCCCAATATGAAGACACTTAGATTTTAAGTCCAGATAAAATTGGATTTCCGCCG
AAAAGCCACCTCAACTTTTTACATTTGCTATTTAATAGCAATAGCACCTTGTTGCTTTGC
TTTGCACGAGCTTCCTATTTATGCGTAGGAAGTAGTTGCAGTTTCCTTCGTTGTTCCCTT
TATTATTAAATTGTTTATTGTTGCATTTGCTCATTCGATCAAAATGGAATGGGTCGTTTA
AAAAAATATTGTTAACTAACTAGATAGTAGGTTATAATCCCAGTTTGCATAATGAATAAA
TGTTGCATTTGTTTGAAGTGGTGTTTGTGAATGAAGGAGTAAGAGAGGAGAGAAAGATAT
GTGAATAGAAAGTGTAGAGTAAGAAAATGAAAAAATGAATGAAGCGAAAAGTATAAAAGT
AAAAAATTAAATAAAAATAAAATAAATTGGTTCATTGTTTATATTTATAGATCTGTTTAT
TTTTTAATTTTTAATTTTTTTTTTGGAAGTCATAATTGACTACTGTAGAGAAAATTAAAA
AAGAGATTGTAAAAATTAATTGAGATTATAACAAAAAAAAAATTTGAAAAGAAATAATAA
ATTAATTAATGAAATTAAAAAAAAAAAAAATTGAATTTCAATTAAAATTCGATTTCATAT
CGAAATAATATATGTATACATGTAATAAAATAAATCAAAAATTGGATAGAGAATGACATG
AAAATAGTACGAATTAACCAAAATATAAAAATATATATATATTCAAGTAAAAAAAAAAAA
AAAAAAAAAAAGAACCAATACATATTGTACCATAGTTATTTATGTAAGTATGCAAGGACA
GAGGATTAATAAAAAAAATATATTCATAAGGATTACGGTAAAAAAAAATCATGGGGATTG
GATTTAAACATACATAATTTGCAAAAAAAAATATAGGGACTAACTTTAAATGAATAACAT
GCGTAAATAATACGGATTGGAGAGTGAATGAACAAGTATCTGCATTTTCGTCAGCAGAGA
CAATGTAAATATGTAAATGTAATGGGAGAGGCAGATTGGCGTTTACGGCTTTTGTGATGC
GTAAAAAAAAAAAACAAAAACAAAAACAATTGAATATGGGATGACAATTTGCGATATCAA
AAAATAATTGAGACGAGACAAAAATGAATGATTGAGAAGAGAACAAGGGACGAGATGAAA
TGAGAGGAGACGAGGAGAATGGAATGGAATGATCATGGCCTAGCTGATATAACGATCGCT
TTACCTTTACTTCACTATCGAATTCATTGATGATGATGATGGTGTATGACAAAAATGGAT
GATGGATGATTAAGCTATCGTTAAATGCAAACAAGCGATGTGGAACGTAACGCTAAACGA
GAATGTAGAGAGTCGCTAAGAAAAGGATCGCGTGAAATAGTGACCGATTTAACGAGAGAT
AGCGAACGAGAAAGGAAAAAGAAAAAGGCACGCGATGCTAATGAGTAGCACAGATTTTGA
AAGAAGAAAAGGAAAAAAAAAATATCGCATTCTATCAAAAAAAATCGCTTTTCAAAATTG
AATAGCTTTTTGGAATGTACTTTTCTGTATATAAATGTTGAAAACAAATTTTTACTGGGG
CTATGAGCCTTTTACTCCTGTGTCACAAGTCTCATGGTTCGGTGTTATAGGGTGCTGGAA
CGAGTAAGACGATAAGACGCAAGCCTAGGGAAGAAAGGAAGAAAAAAAAAAGAGCTGCGC
AAAAAAAAAAAAAAAAAAGGAAAGGAGTCGCATGCCATTGTAGAGAAAGAGAGAAAGAGA
AAGAGAATGTGAGAAAAAGAAAGAAAAGAAAAGGAGAAGGAGAAAAGAAAAGGAAAAAGA
GAAAAGAAAAAGAAAAGAAGAATAACAAGATCAGATTAAAACGAAACGAAACAAAACGAG
AAAATAATCTTTCATTTGATGTTTGCGAATCATTAGCGTTAATTAATTAATAAGTTGAAT
TAGTCGATACAATACAATACAAGGACAATACTATACATGGGACAACAAGACAAAACCCCG
AGTCGCCTAAAATTCCCACTATAACAAATGGCTCGCCCAACTTCTCTATTAGCAAAAGCT
GCTTTGACTTTACCGACTAAGCAAAACATTGACTGACACTCACCTGTACTATTATCAAAC
ACCGAAATAAGGGTACGCACTAGGGAAAGACTCATGTGATGGAAAGAAGCAAAGCAAACC
ACAGTGGCGGAACGGAAGAAAAGTGGAACCTTAGTGAGAGCAGCAACAAAGGAAAAAAAA
AGTGGAAAAGAAAAACAAAGTGGGGAAATTGAAATGATTGAGGGGATTTTTGTGGAGGTT
ATTGACCTATTTGGAGAGGATTCCCATGAAAGTGTCCAAATTGACGTGAATTCCATATTC
CGATAATAATTTTCACCAATGACATAAATTTGCGACCAACAGAATAGAAGCCTGTGCACC
TAAAAAATAGCCTCTCCACCACAAAATTGGTCAAGATTTGCGGAGAAGGTGATGGGATTG
GTGGATGGGCGATATACTGCGGGGTTACACGGTATTAGGAAGCCTAAAATGCGAATTCTC
CACACGATAGAAAAAGATGAAAAGAGGGGTTGGGGGAGGATGACGAGGGTGACAGAGAAA
ACAAAGCCGGTTGAATGCAAACATTTGAAAGACAATGGATGAGGGTGTCAAGCATGAAGA
AAGAGAGAGAGACGGGTAAAGGAAGAAGAAGCAGAAAAAGGGTAGAGAAGGAATAAACTA
GACGAAAGAAAAGGTTGAGCGGGGAGGAGGAGAGGAGACGAGAGCGAGAGCGAGAGCGAA
AAAGAGAATGTGTGTGAAAGAGAGATGTGTATTATGTGTTTTATTTTTGTTTATGTATGT
GTGTATGGAAAAGGTTTGATGGGAATAAAGATTTATTTTTTTTTTTCAATAAAGAAAAGA
AAAGAGAAGAAAAAATAAAAATGAAAATAAAAACGAATTACTACTTTTCTTTTTTCTTTA
GAGTCGCATAAATTTTCGCAATATTCTACTAACAAAGAATAAAAGAATCTTTCAATATAT
CGGTATAACCATAGCTGTATAACAATGTTAACAATGTATATTGTATAATGTGTAATTGTA
ATGTATAATGTAATGCAATGTAATGTATGTGTAACTAGGTGAATCACCATGTATCCAAGC
TGTACGTATCCACGCAAAGTTAAGATTACGGAAACAACTTTGAAATATGAGGATTTGTCT
GCATTTCCCTCTTTGTTCTGACCCATGTTGACCCAGAATTGGGCGAGACAAGTCTTCACA
TTGTTGAAACGCACAACAAACCCAGCAAGGAAGTTTATTTGTGTGTGTGTTCCACACCTA
CCCATTAGGTTAGGGTAGCGTGCGAAGCCATGGTAGGTAGGATGGTTTCATAGCTGCATC
ACACATTGCAAAAGTAGAACTTGTTTTCAAACTCTAGTGTTGAAAGGCAGCTAATAAAAT
TTTTGTAGCAAAGTCAAAACGCTCTAGGATGAGCAACGCCCACCCAAAGGCGGGGCTTTA
AGTTTCAAAAAGAAAAGTGAAAATGCTGGATGGTGCAGAGGTTAAAAGATATATAGGAGC
GGTATGGACGAAGCATGCCCCACAGTAATCAAGTGCATACAAATCATGTAGTGTGTGTTG
TGGATCTTGTGGATCTTATGGGACACGAATGTTTTGAGGGGCAGGGAGAGAGAGGGGGAA
AAGAAATGAGAGTGAGTGATTGAGGAGAAAGAGAAAGAGAGAGAGAGAGGATAGAGTGAT
TAATAAAGATTAGAAAGGTTAGACAGGTTAGATAGGTTAGTGAAGATGAAGAAGGAGGAA
AGCAAAGATGAAAAGAGGATAAAAAAAAAGATAGTGAAAAAAAAAATATTAGGACGATAG
TTTAGTTAAAACATTGTTAGTACATAGTTAGTAGATAGCTAGGATCACAGGGAGAAGCAA
TTGGAAAAAAAAAGACTTGAGATGCTGTAGATAGATAGAGGCGAGTAGAGTTGGATGTGA
GGGAGACATCAAGCTCATAAGTTGGAGGACTTTTGAATGGACTAACACCTGAATGTCAAT
TCAAATTCACTTTGTTGGCCATTACATTCACCTCGTTGGTCCATTCACATTCTAGCTTCA
AGTGGTAAACGTACTGCCTGATGCTGGAGATAGCTTGTCATGAGGAGGAGGAGGATGATG
CATACCTTTCCAAAAGTAGCGTAGAACGTGCAGAAATCGTTGGACGTGTAAGAATTAACT
TTGAATCCATTGTACCTTGGTCCCACATCAGGTGGCGACAAGAAGGAAGCGAAATGAAGA
GAAATGAAGAAAAATAAGAGGATGGGAAATGAAAGGAAGCGAAGCGAAATGAAATGAAAT
CAATTTTAGGAAAAGTAAATGATAAGCCATGACACCAAGAAATCCTAGTAATTATGATTC
CCTCTTCGACTCATCGATTTTCTCATCCACTCTTTTTTCATCTTCCTTGTACCACTCGGC
ATTCGATTGTTCGTTCGGTATTTCCTTCACCATTCAGCCGCCCATAGAGTACATAGTGCT
ATCAAAGCCTTGTTTCTTTGCAATCACTCCCCTCCTTACACTACGATGCAATGGCATAGC
ATGGCATGACAGCCTAGACATGACAATCTGGGTCAGTACCGTTACATCCCTTCCCATCTC
TCACTGTCTCATTGTCTCTCTCTCTCTCTCTCATGCCTTTCCAAGTCTGTTCTACTCTGC
TCTTGTCTTGTCTTGTCTTTCTCTCCTCTGTCTCGCATTCACACCCCGCATACCCTTTCA
TCTCCACAGTGTAGTTTGTAGCTACTTTGGTAGAGAGTGTTTGTCTCCTCTCTTTCCTTC
TCCATACTTCACTTGTCATAATGGGTGATTTTGGGATGGAACGTGTGTGTCGGCCTACTT
TCCCATCATCTTCGCATCCTTGGCGCTTCCATCCATGCGTCGTTACTTGTCCGTTCGGTA
AAACTGTCAGCAAGGCAATTTTGTGGAGTATAACAAAAGATGGGGTATGGGAGAGTGTTC
CCATTTGTATTGTCAAATTTTAGCTACTCCGACGTGCGCCAATCAGAATGCGTGTCTCCA
AGCGCAAGAGTGGGCATTTCTGCGTTCCCCTCTTATTACACCCTACTTCATACACTTAAC
CCCGCATCCAAGGTATGGGCAAGATGGGACGTTTGTTGGTATATATTATAACTGCAAACC
CGGTCTTTTCCTTCGTCCAACAATCGGTTTTATCCATCTCTACACTACATTACCTTCCTT
ATCATCGTTAATTCCTTTGTCAGGTCTTGCGTCCAACTTTAGCTGTCTGTGTGTATCTTT
CTCCCTTCAGCGATTGTTAGTAAGTTAATTCCCTTTCAACCTTTGTGTTTTTTTTAAAAA
CTCTTTTTTTTTTCACATTCCCATCTCGATTGCTTTATTTTGCTTCGAGTAGTTTGTGTT
TTGTGCCTTTTTCGATTTGTAAGGAATCGTTCATCTTCCAAATTTCCATTCATTCTCTCT
CATTCCTTTTGTTTGAGTCTTGTATTTTGCGTATTCGCTCTCCCTCTCTATATACCCTTC
TCTTAAACTCATCTGTCGTTTCTTTTTTTTTTTGCCTTTTTAATTCCAAACATCTTTTTT
AAAAGAAAAAAAAAGAAATCTTATACCCTTTTTAAGAAAAACAAACAAGCAAGCAAGCAA
AAATACTTTACTAGCTTGTTCAAAAAATTTCTTTTTCACTGTTGCGTTATAACGATAGTT
AAACTTCGGTTTCGGTTCTATTTTGGGCTTTTGTCTTGTCATTGAAAGCTTTTTGTTGTC
TTTTAACCCTATTTACAATCAAACCCTTTATATCTTTTTTTATTAATTTTTCTCCTTCCA
TTATATTACCCTTTTAATCGTAATTTTCAAAAATGGGAAAAAATTTGACCATTGTCATGT
TGGTCTTCGTGTCCATGGCCGGATGGATGTTTGGCGCCGATACCGGTTCCATTGGTGGTA
TCACCAACATGAGAGATTTCCAATCTCGTTTCGCAGATCGGTATAATCCGGTAACAGATT
CGTATTCGTATTCTTCGGCGCGGCAAGGTCTAATTACTGGTATGGTTAACGTTGGTTCTT
TCTTTGGTTGTTTCCTTTCTTCCCCTCTTATGGATCGCATTGGTAAGCGTACCTCTATTA
TGTTTTGGACTATTGTTTATTTGATTGGTATTATTCTTCAAGTTACCGCTGTCCCATCTT
GGGTCCAAATCATGGTTGCTAAGATTTGGACTGGTCTTTCCATTGGCGCCTTGTCTGTGC
TTGCCCCCGGTTTCCAATCTGAGGTTGCTCCCGCCGATCTTCGTGGTACCATTGTCACCA
CCTATCAATTGGCTGTCACTGGTGGTATTTTCATTGCCGCTTGTATCAACATGGGTACTC
ACAAGTTGCACAAGACTGCTCAATGGCGTGTATCCATGGGTATTAACTTGCTTTGGGGTA
TCATCACCTTCATCGGTATTTCTTTCCTTCCTGAATCCCCTCGTTATTTGATCTCTGTTG
GTAGAGATGAAGAGGCTCTTCAAATTATGGCCAAGAACAACGATCTTCCTATCGAACACG
AAGTTATCCAAACGGAATACCATGTTATTAAGTCTGATTGTGAAGCTGAATTGGCTGGTG
GTCCCGCTACTTGGCCCGAAATTTTTGGTCCCGACATTCGTTATCGTACCTTCCTTGGTC
TTGGTGTCATGTCTCTTCAACAACTTACCGGTGATAACTACTACTTCTACTATGGTTTCG
AGGTGTTTGAGGGTACTGGTATGAACTCTCCTTATCTTTCTGCTTTGATTCTTGATGCCG
TTAACTTTGGATGTACGTTTGGTGGTCTTTTCGTCCTAGAGTTCTTTGGTCGTCGTATGC
CATTGATTATTGGTGCTCTTTGGCAATCCATTACTTTCTTCATTTACGCAGCTGTTGGTA
ATCGTGCTCTTACTCGTAAGAATGGTACCTCAAACCATCGTGCCGGTGCCGTTATGATTG
TGTTCTCATGTCTTTTCATTTTCAGTTTTGCTCAAACTTGGGGTCCTGCCGCATACGTTA
TCGTTGGTGAATCGTATCCCATTCGTTATCGTTCCAAGTGTGCTGCCGTCGCTACCACTG
GTAACTGGTTGTGGGGTTTCCTTATTTCCTTTTTCACTCCCTTCATTACCAACTCCATTG
GATTCAAGTATGGTTACATTTTCGCTGCTTGTAACTTGTGTGCTGCTTGTATTATTTTCT
TGTTTGCTCATGAAACCAAAGGTCTTACCTTGGAAGAGATTAACGAACTATATATCTCTG
GTGCTAAGCCCTGGATGCCTAGACCTAAGAACCTTGGTAACTTCACCAAGCAACAAGAAG
AGGTTCGTGAAAAATCCCGTGGTGTTCAAGGCGAAAGTGCCGCTCATCTTGAAAACGTTG
ACGGTGAGGAAGGTATTGAGGACTCTAGCAATGACATTAGTTCCACAACATCTTCGGATG
GCCGTGCCAAGCCCGAATCTAGCTACCACGATCAGGAAGAACAATTCGCATAGATTGCTG
ATTGATAACAACAATATTTATAAAAAGCTTAAAATGCGCTTATTTTAAGCTTAATGTTTG
TCGTGGTTCGTTGATTCCTGTTGTTGTTTTTTATTATATCCCTGAAAATTTCTGATGTTT
GTTAGGAGTAGCGGTGGCATTTTTTAAAGATTGGAACTAATTTATTCTTGTCTCACTCGC
TGCATTTGGAAGATAAATGAATGAATACCCAGAAAGGCATACGGAAAGTTTTTGTCTCAT
CATTTCATGCTTTAAATTTAATGTTGGTTTGGATTTATTTAATTTTCCTAGCTTTAGTCG
ATTGTGGCTCTTAATAAGTGAAATGAGCTTTGGATTTCTTAAAAGTCTCTTTTCCCTTGC
TGTCTTTTTACAATTTATTCCAATGGTCGTTACTGTATTGAATATATAATATGTTTTTCC
AAGTTTTTGTTTAACAAAAAAATATTTTTTTTGCATCTTCTTATCCTATACTTACCTTTT
GTGTTGTAAATTTATCGTCATCGTTAGAGGATAAAAAAGTTTCCAAAACAGTATAAATAT
ATATATATACATAAATACAGGTAAATGGTCTAAATCAGTATGTAAGCCAATTTTTCAAGT
TTGTTAAAAATTTGAATGAGTAAGGTGATTAGAGGAACGGAATTATGTATACATAAACAC
ACACACATTATACATATATTGAGATATGTTATTGCAGCTTGTGCAAAGTTGGGATGAGTT
AGCGTAGTCACCTTTGCCAATGTAATCGTTGAAGAAGTATCTATGACATTTTCTTTAAAT
TTTCAAGATTATTTTCGTTTTTCAAAACGGTGATTATAAGTAATAAATTAAAAATTTTAA
TTATCGATAGTAGTCAATACCAGAAAAAATTGAATCCATGGGTAGTGATTTAATTAATAT
GCTTGCCAAAGGTAAAGATAACTTAATTGGAATCCATAAAAATGTTAAAAGTAAGAATGT
ACACTGCCTTCTAAGTTTAAACCACCACTCTCGTCTATCATTTTACTATGAACCGCACAT
AGTTTAAGATAGCAACATTTGAAATTATGTTTCTACAAAGATTTGAATAAGTCATTGTAT
AGTGTACGTCAAAAAAATGTTAAATGTTTAAAGTTTCCATTAAGTTTTCTAAAAATGGTT
TGACTTGCTTGCAAAGGGAAAAGTGTCTTTCCAATATCTGACTGTCAATGAAAGAGGCTT
CATGAAGTGCTCAGGGCAAGCCGGAAAATTTGACCTAAATGCAGATAATTTTTTCATTCA
TGCTTTACTTATTTAAAAAAATTGTTACATATATACAAAAAGATCATGCGGTGTAAAAAG
GAGATGTTAGTAGGAAGGTAAAGGTATCTTGGATAAAGAAGCGGATGACATCAAATTAAC
ACTAGCCATCCGCCAACCACAATTTCAAGGAAATCTTAGAAAACTGTTCGTTGAAAAAGT
TAACACGATTATATAGAACGGGAATGTCAGAAGAAACATCAATTCCCGGAATCATAGCTT
CTACTCCACCTATTTCAAAAGATAGTAGACGTAACGTCAGTCACTGGCTACAAGCGTTAG
CGGTATTCCTTCATAGTGTCAGTCTGACATTAACGGCATCTTGGTATACAGTTTTATGGG
CTTTCCTCCCATTTTGGCCTGTAAGTGAGCATCTTTTCTGATGTTACAATATCAATGATT
TCTGAAAGTGAAACTTCATTTGCAAAATGTATCGCGATTCGAATTGCTGAAAAAAGGCGT
TAGGTATCTCATGTTTGTTCGATGATACTAAGTACTTTTCGGTTTTCGGACTACAAAAAT
AATCCGTCTCGCTTCCCTTTCTCAAATGTTGAAAACTGATCCATCTATTTTTTTTTACAG
TCCATTTTACTAATCCTTCATTCCTTTAGTTTTTAATTGTTTATTTGATTTGGTTAATAT
ATGACGATGGGTTTGTAACAGGAAAAGATCGGCAAAAACGTTGGCTGCGCAATGCTCCCC
CTTATCGTTGGTTTTGTCATTACTTCCCCATTCGTCTGCATAAAACTACTGAGCTTGACT
CTGAAAAAAATTACATATTTGGATATCATCCACACGGAATTATTTCGCTTGGTGCATTCG
GTGGTTTTGCTTCGGAGGGTATGTTATGATGGAGAACCCGGAAATTAGAGGCTACTCTAC
ATCAGTGTTTTCCCTTTTAATTCCACACATAGTTTTCTTATTTAATTTCTAACCTTATGC
TATTAGGGGCCGATTTTAGTAAATTATTTCCTGGCATCAACGTTTCTGTCCTGACCCTTA
ATTCTAACTTTTATGTGCCGGTTTACCGTGACTATCTCATGGCTTTAAACATCAACTCAG
TATCCAAGAAATCCTGTGTTAGCATTCTTTCCCGTAAGCCAGGTGATAGTGTTTTGATTG
TTATCGGGGGAGCTCAAGAGTCTCTTTTGTCCCGTCCAGGTCAAAACAATCTTGTACTTA
AAAAGCGTTTCGGGTTCGTTAAGTTAGCTTTTTTAACAGGATCCAGTTTAGTCCCTTGCT
TTGCTTTTGGAGAGTCTGGTAAGATTGAATTTTAGTATTTTTAGATAGCTTAAAAAGTCG
TCGAATTACTTTGATGTTGTTTACTTTAGTATCTTGCTAACCAACACAAGACATTTTTGA
ACAGGTTGATAACAATCCGCGTACTCGTATCTACAAATTTCAAGAAATTGTCAAAAAAAT
TGCAGGATTTACAGTCCCCTTTTTCTATGGTCGTGGACTATTAAACAAAACTTTTGGGTT
GATGCCTTGGCGTAAACCTATTAACATCGTTGTTGGAGAGCCCATCGATGTTCCTAAAAA
GTCTCACCCCACAAATCAAGAAATCTATGAGGTTCATGAAGAGTACATCCGAAGACTTGA
AGGCTTATGGAACAAATACAAAGATGTGTTTTTACCAAATCGTATTAGCGAATTGAAGTT
GTCAGCCTAAATTAATATGAAGAAGTCTTCACATAAAATAAGAGCAGTTTCTTATTGGCC
TATGCAATATGTTGTGAGATTTTATATCATTAACGATTTCTTCTTTTCCTTCTTTAGAGC
AGTTTATAAGCTATATTTATTTTGCAAAAATTTACAATATAATGTTTGAGGCACTTTAGA
CTTGTTTATTTCTGTTCCCTTCTTCAATTAAATGTAAAGGCGGTTGCTTTCATGCAATCG
TCTTATCATGCTAAGTAAAAATCATGCAGCAAGCCATGAGACGATAATTTCGTTTGTGAC
TAAAAGACGACGCAGCAGTATGCAATAGTATATAAATTAGATGGCATACTTGGCGGGGAG
TATTAAATCGAAGGCATGGGCTTTGCCGCCTTTATTAAATAATTCAGTAAGTCTTAGCGA
TCGTTTACATTTGATGAGTTGACAGGGTTTGTAAATTCAAACAAAGAGTAAAAGTTACAG
CCCTTTGAGGTATCTGATCAGGTTTAATATTGGTACACTGCATGCTATAAAGGATAAATG
GAAATTATCTTTGTCTTACTGATTCATAGGTATTCACAATTACTTCAAGCGTTACTAATA
TTCATTCAGTAATTAGAAGAAACGATTTTTATTGGAGGCATTTTCACAAATGGTTCGAAG
GTTCAGACCTGCAATAAGTTTAATTAATTCAAGCAACCATGTACGCCCAATGTTTCCTAT
TGTCTAATTGGAAATTAAAGTGAGTGTTTTTTAACGGAATTTCAAGTCGTGCTTTACTAA
CAAAATTCCTTATATGAGGAACGAGGAATTTACTATATAAGCATTTTTAAATTGTTCGCA
GATTCGGTTCTAAAAAAAAAAGAGGCCATTTCTTCTTAGCTATTGCTTTTCTAGTATTAA
CCCAATTACTGTAGTTTCGAAAACGAGCAAAAAGGTCTATAAAACAAGTGTAGGGAGTCG
ATCTCAGACTGCAAATCGCTAAATTTCAAAATTTGATAAGGGTAGAGTCTTGTGAGAAGG
AAAATAGAATTGTCGAATATTTCAATAGCATCCTTAAACCAAAGTTAAAAAAAAGTATAT
ATATCAAACTAAAAGCGTACCTGCTAATTGCTTGAAGCATTCGATGTTCAACTCATAAGC
TTTATGGACACACTCTACGATGGTTAAGCATGTGATCTTCATACGACGCTTTGCTTCCCG
CAAAATCAATATAACTATTAAAAGATGTATAGAGTGATGGGTGTAGTACTCTAAACATAC
TGGAATAGATTATATGTGAACTAAGGAACATTCGAATAGATCATCTTCATAGCAAAATAT
TCATTTGGCAGTTAATTAAAATGTTTATGAAATTACAAGATGATCAATAGTAATTATGCT
CAAGAATAGGCTCAAAGATGAAGAGGTGCATAATATAGTGTAAAGCACTATGACTCTTGT
GTTCGAATTTCATTAACAATACTACCCTATGTACGTTACGTTGTCACCGATAGATGTAAT
GTTTGCAAATCCGTTGTATTCAAGTCACCAAGGCAAACTATTTACTACATGTGTCAAAAC
AAACAATATAAAAATATTATAAATAGAGCTCCTACTGAACTGAGGAACGAAGTTCAGTCA
TATGCTATATTAGGGATAGGTATGTTATACTCAGTTGCTACTCATACTACCTGCGTATCG
CAATATAATAGATCACAAGGAAACCCAACACAGTTCTATGTATTGTTAAAACAAATACCA
AACTGCGTAGCTGACATGTTATTGCGATAACATTTCGTCTATCTAAGTCACAATATTTTA
TTATGCTGTTCATTATTTTGTAAACATTGAAATTTGTTTGAATTGAACCAGTAAACAGAA
GAAAAAATGATGATTAAGCTTGATTCATTAAGAATCAGGATGAAAGAGAAATGAATGCAA
TAAACGACAATGAAATTGTGAATACAACAAGGAGGAACAGCGAGTTTTCCAATTTCATTA
GTTGATGATAACAGTCAATTAGTGAACTGCTATTTTAAAACGAATAAATAAAACCATTAT
TTTAATATTCAATTCCCAGTGTATGTTATCCAACATCGCAGAATCTTTCAAGCAATGCAC
TTGCTCATCCATTTCGTCAGGAAATGAAATCATGCAATAAAAATACATCTGAAATACTCT
AAACACATCATGATTTGTTTGGTAAATCACAATTATATAGATGCTTCTTTCCATTGCACA
TTCTTGTAGAGAAGTTTCGTGAGAAAAGCGCCTTTATAAATCAATAGTAAAGTTAGCAAT
ATAATTAGGCTTCATTTTCAGGGTTCATCTCACGTAACGGAATAGCAGTGTATTCATTCA
CGTGTTGTCTGGCATCACGATCTAAAAATAATTAGTAAACACATTTAAAGTACACTTCTT
TTTATCATCTTTACCGCAAGTTGTTGCAAGTCTGGTCAGTAAATGCGTAGAGCAAGATCC
CGGTTCCACTATGTTGTCAGTATTAATTTTGTTTAGTAAACAACAAACCTGTTTCAGCAA
TGAATATGAGAATGCTTGATACAGCCATGAAAGTGAAAGCGGATGCCGAGCATTTCCATC
CCCATTGTTGATCACCTAAATGTGAACTCAATTTGTTTACACCTTTTAATAAAACCAAGC
AAAAAATAGAACTTTTACAAAAAGCAAAAAACATGTTTCTCCACTTCTTTAAAAAGTGCT
TGATTCCTTTTCCGCAAGCCTTGACACATTGTGCCAAGAAAATTACAGTTACTTTAACTG
CCTTGGTCCAAATTTCATAGAAGTCTAATGAGTTAGTGACTGAAGGTAAGAATAACCCCA
TCGTCTCACTTACAAGTCAAGAATATTAAAGCCAAAGTGCAAACAAGACACCAAAATCCA
AATAATGTCCATTCCGCTGCACCATAATTTTTAAAAAAAGCGTCCTTATACTTTAGATAA
CAAACTGCTGGAGCATTGAATAGAATGATTGAAGTGAATGATATTAGCAGTTTTATCAAC
AAAGGGGAAGAATTATCTGTCGACCTGGAAGGATTGTTTTCTCTATGTGTGTTAGGAGAA
TTGCTTAAACGTGCATGATCTGTTTAAATTAATATGATTGAAAGACTTTAGTTAAGAAAA
AGCATGTATCAAAGTGTGTGCATTGCATGGCCAACTGTAAACAATGACCAAAGCATGCAA
TTTGACTACGATGGCAAGCTTCAACTTTCAATTGAATAATTCCTTTCTTATTATTTACAA
TTCTTACCTGAATATGGAGGCAATGTACTTTCCTCCTCTGAATCATATTCTGGGAGGGGT
CCTTTTTCCAAATCAATTTCATGATCTGTCTTCAATTCATCTTCTTCATCTATAGAACTT
TTCAAGGAAGTGTAATTATTCTTCGTTTCATCAAGATAATTCTTTATTTAACAAAACACA
TGCGCGAATTAATTGCTATGATTGCGACAAACGAAACAGCAAAATCAAGAATATTCACTC
TGGAGTTCAGTTCCCGCCGTTCAACATAAATAAATGAGCAATAGTCGTTTCAAAGCAAAC
TGTTTTTTCAATAATAGCAAGTGAAAAGTAAAATTCCAAAACTCATTTTCAAAATGTAAT
TGCTTCTGACACATTTATTTTGTCACTGCCCTTCTTATTCACCCCAACTTAGATTTCCTT
ATGCATCATTAAGAAACTCAACATAAAACCAGTATATACGTTTACTGCGTTATTACATAC
TCACTATTGCAATATGTCTTTAGGTTATTACGATAACAAATCATCGTTCTGAGTCACAAT
ATTTTATTATGCTATTCATTATTTCGTAAACATTGAAATTTGTTTGTATTAAAGTAAACC
ATTAAACAAATGGAAAAAATGATAATTAAGCTTGATTCATTAAGAATCAAGATGAAGGAG
AAATGAATGCAATAAACGAAAATGAAATTGTGAATTTAACAAGGCGGAACAACGAGTTTT
CCGATTTCATTAGTTGATTTTAAGTTGTCGTAAACAAGTTAAACCATTATTGTTTGTAGC
GTAGAGTATCATTAAAAAAGACACATAATTAGACTCGCATACATAATAAATAAAGACTTC
GGTCCTCAATGCACATTATCCAACATCGTAGAATGCATTGGTTGGCAATTTTTGGTAATT
GAAAGAATGAGTTAAGCTTATATCTCACAAACTTATAAGGCAAGAGAATAATTAAAGTAT
GTTGGTGCTTATTTTTAAAAAACGCCGCAGCTTCTCTGCGTTGGTGATTTTGGTAAAGAG
GTTTTCCAACTGGAGCGACAACCACATTAATAAAGCAATTAGACTTCGCTTTCAACATCC
ATTTCTCCCAAGGGAATGTCATTATTATCGTTGGCACCTCTAAACGCATTTCCTATCCGC
CCAATTGCATTTCCTATCCCTCCAAATGCATTTCCTATCCCTCCAAATGCATTTCCTAAA
CCTCCTAGTCGGGTAAGTAAAAAATCATTCATACAGTTGGTTGAATACACATACCTAGGA
AAGAAGCTATACCATTCCCGATAAATTTGGGCATCCTTTTGAGAGCACCTGGACGTTCTG
GTATGGTTAGAGTAAATTACAGGAATATATAACGAACCCATTTCGTAAAAGAAAAGAAAA
TTTCCTATAACAAAGAGTGAAGAGGCTTCAATTTCGTAGCCTGTCGCGTCGATATGTTTA
TCAAATAAATACATCAAACCTTTCGTTACAATAACGACACAACTTTGTACACCCAGCACT
TGAAACAAACCAAAAAGCATATGCTTGAGTGTCCAAATTGGAATACAAACTGTATGTTAG
CGTTTAGCAAGATAATTTCACTTACCAAGCAATAAAATGAAAAATAAAGCAGCCGAAATA
CTGCATGTGGAACAGATGAGTGCCTTATTTAAGTTTAGTCTACCATCCTTGACGCAACCA
AAGAGTATAAAACAAATGACTACCCATGCGAGCCAGATTGTAACCACCAAATCTTTTTTT
GAGTTATACAAACCGACCGCAATTACCTTTACACATTTTGCCAAGAAAACTGCAGTCACC
TTTACACATTGTGCCAAGAAAATTACAGTCACCTTTATACATTGTGCCACTGCCTGGGTC
CAAGTTTCAAAGAAGCCTAATGAGTTAGTGAATGGACATATTAACAACTTCATGCATAGC
TTACAGAAAATAACAATAAACACTATTGGACATGTTATACCAATTGTGACGGAGAAAGCT
ACCTTGCCGAATATCGACTTCTCCAACGGGTTTACACAAACCCATGCAGTAAAAAAGACA
ACAATAACTGCAAGAACTGATATTAGTAGTCTCAGAAGGGAATATATATTTGGATGTGAA
TCTTTGAATTCTTGTCTTCTTTCGACATTGGGATTTGCAATTTCTGTAGGTCCTGTACTT
GAATCCTCAGATACAGTTTTAATATATTTCCAAATTTCTGAAAGCATTAATAAAATAAAT
AACTTTTGAAATTTGGTTTTTTTTTTTTAAAATGATGTAGAAGGAAGAAAGTGTGTGCCC
TGTTAGACGAATTTATGCTCGTAATATGTCAAGTTGTAAACAAACAAATACAACAAAAAC
ATTGTAAATCAAAACAAACAGACACAGCAAATAATCCTTGACACACTCAATTCTTTATCT
TATCCACCAACAACACAACACTTACCTGAATATGGAGGCAATGTGCTCCCATCTTCTGAA
TTGTATTCTGGGAGAGGACCTTTTTCCAAATCAATTTCATTATCGTTTTTTGTACTCAAT
TCATCCATAGACGACCTCAAGGGATAATCTTTATTCTTCATTTCTTAGAAACAATCTATT
ATTGAATGATATACACACAAATAGTTCAATTGTTGTGATTGCGACAAACGAAACAGCGAA
ATCAAGAATATTCACTCTGTAGTCCAATTCCAACCACTTTAAAGACTTTTTAACAAAATA
ATAAAATTGTTCAAACAAATTTCCAACTAATTCCTTCAAACAATGGCATAAAAAAAGAAG
AACGAAAAAACTGAACGAGGCAGTGGATTGCTTCTGACACATTTATTTTGTCACTGCCTT
TTTTATTCACCCCAACTTAGCTTTCCTTAAATGTAAGCTACGCAGTTTGGTATCTGATTT
ACGGATACGTAGAACTGCGGTGAGGTTTTTAGTAATTTCAATATAGCGGTATGCGCCCTG
TTAACTAACAATATTATATTTATTGTTATAAGAAGTCTAATAGTATCGAATACCAATATA
TCTAATAACTAAACTGAGGAATCGAGTCAGCAGTTGTTATCAACGGGTATTCATAATACG
GTGGTTAGCGTGTGACATATAATGATACATAACGTAGTGAGTCATAAAACACGCTAAACA
GATACCAAACTGCGTAGCTGACATGACACTGAATTTCTATCACTCTTTAACAACTACAGT
GGAATATACAGTTAGAACGTACATTTTGCGTTGCTTTCACGAATCCCCAAAGTTTTAAAA
AACAATGGCTATAAAAGTAGAGTTACTGTAGGTGTCATATTTTATTACAATTGGTAACCT
ATTATTGTAGAGGTGGGCTTGACTTGCTCTTCAATAAGCAGAAAGCGTTGTCGTTGTCAC
TTTCAAACCTTGGCTCAACTAAGTTGGGATCATTGATTGATTATATGGCTCAAATAATAG
AAAAGCCTTCTCAAAAAGATTTATTTATTTTAAATGGGACTGTGTAAGTGAACATGGAGT
GGTATCATCTTTTTCAGGCTCAAACGATGTTTTAAATGATTTTGCAGAACTAACACTTCC
CTGCAGACGTCCGGGGATCATCGTCTTAGTAAATGACCAGGATTGGGAACTTCTTGAAAA
GGAAGAATATAACCTCGAAGAAGGTGACGAAGTTGTATTCGTCTCAACGTTACACGGTAA
AACAATATTTAGCATTTTTTTTATAATATTTAAAACTAATTGTATCAACTAGGAGGTTAA
ATGGCAGGTATAATTATAAGACAAAACAAACATGCACAAATATCATTAGTATTGAATTTT
TTTTTTTAGTCATAAATCCGACATGTATGCTAAATTTTAGTGTCTTATGCTCTAGAGACC
CAAAATCCAAATCACAATTAAATCATTCATCATGAACAGAAACCATAGACCAGGTTAAGG
TTACTTGATTTCTCGGTATAATTTTTTCTTCGTTAGAGTTGAGTAATTATGATTCTTCGT
CAGAGTCTAGTTGTATTGTACGAGTTCGCCGAGCTTGCCGACGTGGATAGCTTGCAGTGA
ATACCTCGGAATAGGGTTCAAGATCAAATCCTCTATTCTGGCTGGATGATTGTGAACTAC
GGAGGCCTGTTCCATTAGTTACAATATTTCCTTCATCCTCATCTGATGAGAATGGATGTT
GCCTGGAATGAATATTGTTATGAGAAGGAGAATTATTTGAGGAAGAATTGAGAGAATCCA
AACTTTCATTCTGAATGTCAGCAAGCTCTCTTCGTAACTCATCGTATCTTTGCCCATCGT
TATAACAGGTCTCAGATCGAGATACCATATTCGTCCCTCCAGAGTCGCGCTCTTCATCGA
AGCCGTTCATAATATCAATCTCTTCACTATCTGTGCTATCCAAAGCAGTAATACCATTTC
CATTACTTCCATTGACAGGAGCTACGAAGTCATCGTCACTTTCGACAGGAGATAATTGGC
TTGTAGCACGATTATCTATAAATCCATCATCAACATCGTACTCACCTGGACCAGAAAAAT
CAGATTCTAAATCAGACCCCACAAATTCTTCTCCTTCGTCAAATCTCAGCCAATCTTGTG
GTACTGCAGTTATTGGCGCATGTCCCATATTATTAAATGCGCGGTTAGTCGAGATATTCC
CACCACGGGTGTTATCGCCATTTAGGCTGGAATCACTCTCAGCATTTTCTCCATCCCAAA
ACCATTCACGACCAGAATCTTGGTCATCCGATATTTGAAAACCGCAATGATCGCAATGGT
ACGGATTTTCCAATTCCCATTGGCAACGAGCGCATCGTAAAACTCCATCTTCAGAATCAA
CAAGGATACTTCTTGGGTAATGAGAATCTTCTTGTTTAAACATCCCATCAAACAATACCT
CCTTTTGCTTCTTTGCTGGATTTTCATTGATTCCCACAAGTGGGAAGCCACTGTTTGAGG
CAGCAACCACATTCATTATTTCATATACAAGATATGCTGGTGAAGGTTGTGTATACAGTT
TTTGGCGACAAGTTGGGCAAGATTTTGACTCTTTTAACCAATTTAGAAGACACTATTTAT
TAGTTTCAATCCTTTATAGAAAAAAAGTAAATCTAGAAACTTTTAAAGATATAATCTTGC
TCTTTCAATATTTCACTCACAATGAGGGAATTCAATGATAATGAAAAGTTATTCCAGTGT
TAAGCATCAAATTTTCACTTACCTCGTAACAATATGTATGACCGCAATGAGTGGTAAAAG
GTCTTTGTAAAGCTTCTGTGCAAATGGGACATTCCAGAGTTTTTTTTATTTTCTGGAACG
TTTCGAGCAAAGTTTTTGTATCGGGGATTTGTTTTTTATTTTCTGAATTACTGCTAATGC
GAGACTTTTTGTACATTTGAGTTGCATCACTAGACGCAAAAGTTGTGCTGTTGGATTGTG
GAATTAATAGAACCTCCATTTTCTCATCGTCCAAGTTATTATTATAATTTTCTTCATCGT
CTTCATCCAAAACTACTTGGCGATGAGAACTGCGTTTAACCATTGCGCCCAGACAGATAA
ATTACTATTGAACTTGGTATGTGAGCTCTAACGTTTCTAATCCGGAGAGAAAGCTTTATC
AAAATAATAAGTTTAAATAAAATCCTTTAAAAAAACGAATTATATGCAAATTCTTCAAAG
CAAATCAACCATTGATTTGTACTTTATATATTTCTTGTAGATGGCAAATACTCTGCGTAT
TGCAATGCAGCGGTTTACAACTGCATTATCAAATTCTTCTGGTATTATCATAAATATCAT
TTAGTGACTTGTAGTCAGTGTAATCTCGGGCATATGTAAATTTATTTAACGTTACAAAAT
GCGATTGCGTTCAACAAGCATGGCTAATAGCGTTTTCTTGTAGCTTGGATTTTTATGAGG
ATTATTCACAGATACGCACCGATGGCATTTCACGTATAGTTTTAAGTATAATATTTTCAA
CCATAGCTTTCAATGTTTCACTCTAAGTAGAATTGAACGTCTCCCGACTTAACTCGTAAA
TATCGTTGATTACTTACCGGAAACCTTTTTTTGCATCGTTCTAACCAGGTAAATAAATTG
AACGAATGCTATTCAAAAACATTCAAGGATTAAATAACATATCAACAATTAGATACTACG
CTTATTTACTGTTCAGCATACCTTTCTACTCAATGTCTACAATTCGCAATACACAAAACG
ATATGTAATAGCACATTAGAAATAAGGAACTGTTTAATTTTTGTTAATCCTTAACGAAAA
AACTATCAGCATTTAACTAAATTATCTGTTTACATTATTATTAAAATTATAATGCAATCC
CTGCCAGTTCCTCATCAACGCCTTTCCATAGTAATAAGGACCGGGCCACTCATAAAAACA
TTACCAGTTAAAAAGCATGCACACCAACTTAATATTAATATCTCTAACAGAAAGGACGGA
ACAGTTTGAATAACAACGACAAAGGAAATGCAAATAAAAAATAACTCTCAAAGTTGGCAC
AGCCAAAATCCAATTATACAATTCGATTTTAATGAAGGATGAATCAGCAAAAAACACATA
CTCATTAAAAAGAAATAACATTTAAAAACTACCGATTCGTGTAAACCGAAAGCATTGCCA
TTTTCGGTCAACAAACTTATGCGTAGCGATCTTGTTCATCAACATAGTTAGACTCAGGCT
TAGCACGGCCTTCAGAAGAAGAGGTAGAAGATGTAATGTCGTTACTCGAAGTATCCTCCA
TACCCTCATTGTCAACGTTTTCAAGATGAGCGGCACTTTCACCTTGAACACCACGAGATT
TTTCAAGAACCTCTTGTTGTTGCTTTGCAGCTTGTCCGAGATTCTCGGGCCTAGGCATCC
AGGGCTTAGCGCCGGAGAGATACAGTTCGTTAATCTCTTCCAAGGTAAGACCTTTGGTTT
CATGGGCAAACAAGAAAATAATACAAGCAGCACACAAATTACAGGCAGCGAAAATATAAC
CATACTTGAATCCAATGGAGTCACTAATGAAGGGAGTAAAGAAAGTAATAAGGAAACCCC
ACAACCAGTTACCAGTGGTAGCGACGGCAGCACACTTGGAACGATAACGAATGGGATACG
ATTCACCAACGATAACGTATGCGGCAGGACCCCAAGTTTGAGCAAAACTGAAAATGAAAA
GACATGAGAACACAATCATAACGGCACCGGCACGATGGTTTGAGGTACCATTCTTACGAG
TAAGAGCACGATTACCAACAGCTGCGTAAATGAAGAAAGTAATGGATTGCCAAACACCAC
CAATAATCAATGGCATACGACGACCAAAGAACTCTAGGACGAAAAGACCACCAAACGTAC
ATCCAAAGTTAACGGCATCAAGAATCAAAGCAGAAAGATAAGGAGAGTTCATACCAGTAC
CCTCAAACACCTCGAAACCATAGTAGAAGTAGTAGTTATCACCGGTAAGTTGTTGAAGAG
ACATGACACCAAGACCAAGGAAGGTACGATAACGAATATCCGCACCTAGAATGTCACCCC
AAGTAGCGGGACCACCGGCCATTTCAGCTTCACAGTCAGTTTTAATGACATGGTATTCCG
TTTGAATAATTTCGTGTTCACGAGGAAGAACGTTGTTTTTGCACATAATGTCAAGAGCCT
CTTCATCTTTACCAATAGCAATCAAATAACGAGGGGATTCAGGAAGGAAAGAAATACCGA
TGAACATGATAATACCCCAAAGCAAGTTAATACCCATGGATACACGCCATTGAGCAGTCT
TGTGCAACTTGTGAGTACCCATGTTGATACAAGCGGCAATGAAAATACCACCAGTGACAG
CCAATTGATAGGTGGTGACAATGGTACCACGAAGGGTAGCGGGAGCAACCTCAGATTGGA
AACCGGGGGCAAGCACAGACAAGGCACCAATGGCAAGACCAGTCCAAATCTTAGCAACCA
TGATTTGGACCCAAGATGGGACAGCGGTAACTTGAAGAATAATACCAATCAAATAAACAA
TAGTCCAAAACATAATGGAAACACGCTTGCCAATGCGATCCATAAGAGGAGAAGACAAAA
TACAACCAGTCATAGAACCAACGTTAACCATACCAGTAATTAAACCTTGTCGCGCTGAAG
AATACGAATACGTGTCAGTCACCGGATTATACCGATCTGCGAAACGAGATTGGAAATCTC
TCATGTTGGTGATACCACCAATGGAACCGGTATCGGCGCCAAACATCCATCCGGCCATGG
ACACGAAGACCAACATGACAATGGTCAATGTCTTACCCATTTTAAGTAAATTCGAATACT
AAAAATATAGGGCACAAAAAATAATATGTAATGATGTGATTGAAACTTTATTAAATAATA
AACGTTTCAAAATCTATTTTAAAAAGATGAGATTTCACAAAGCTCTATGTTGCAAAAGTG
AAGTATGTAGTATTAATGTAAAGGGAATGTGGATAATATGAACCAGCGAAATTAAATAGA
AAAGAATAGAGGTTTTTTAAAGGATTAAATAACCGCAAAAGGATGAGGGAAGGGGTGTAT
GAAAATGTGATTAATGGATATGCTAGAGCGTTCCAAACAAGAAAAACGAAGACGCTTTAA
AAAATAAAAGAGTGGGTTAAAAAAAAGGAAAGCCGAAGGAACTGAAACCCCGTCGAACAA
AAGTTAAATTAACCGTAAACCACAGATTTTACTAAGTAAAACGTACAATTTGGAGCAGAA
GCTGTAGAAGGCTACTCAAGTGAGCGGGCTACTTATATAGAAAAAAAATACATGCAATAA
TGGATGTGGGGCGCTTGCGGGGTTGCGGGGAGTGTCCTTGACAGCGTAGCTAAATCGATT
CACGTAGGCTAGACACCGTACATGCAGGTCTACTATTGGTGAAGAGAGGAAGCAATTATG
CTCAGTTTTGCACTCCCAAATGCGGAACCATTTATGACGAGAATGGCATCCAAGGCCGAG
GTTGAATAACTGAAAGCTCTGTCGGCTCCCTTAAGGCAAACATCTAACACTAAAGAAGTC
GAATACAAAGGTATTACACCCACAAAATAATAACGAATCATAGTCAAAACTACCAAGGAA
TGACCCACAGTAGGGATGATCCAGCACTGCACAGTAAAAAACTTACAGACGAACCTCTGC
TACTTTCTACCAAATGTCACATTGATAGCAAAACTGTCCATATTGTACTTGTGACAACCA
TCGAACGTGAAGAACGGACTAGGTAAGCTGAAGAGGGTAATGAAAGGGTCTCGACCAGTA
TTTTGATCCTGGCTTGCGTGGCCGGTGAAACCCTATCCAGTTGGTGTACCTATAAGCGTC
TAATATTGGAAAAAGCCAAGTGGAGAGGGCTGTAAACTAGTCTCGTGCAAACGTGAGAAA
ATGCGGAGAAAATGACGACTCCGGCACTTCCTGCCGTTAGTGGGAAAGATAGGATGGTCA
AATTAGTACGGCACTATTCCGAATGCACCATAACTGTCCACTCCGCCAGTGAGGTACATT
AAAAAAGTAGATTGCAACGACGATTGCAACGTTGGTTGCTATGCCGTTGCTTTACGAGGT
GTAGTGTATGCCAATGCTAAGAGGAAATGGCAAGAGTGGAGACTTTTGCGGTAAAGGTAG
ATTAAAGAGATCTATTAGACGCATCCTTACAAAATCTTATCGTAGTTCGTAGGGAGGCGA
TATAAGATGAATTGATTTTCTAGTTGTTGTTGTTGTTGTTCAACTGTACTGCAAGCCGCT
AAGGTAGGCCAAGGATGAACCGTGTAAAGACTCGTAAAGATACCTATAAGGAAGAGAGGG
AAGATAATAGTTAAGAGAGAGAAGAGTATACAACGATAGTTATATCACTATTGAGAAATA
ACAGAGCGTAGTAACCCGAGACAAGTATAAACAAACCAGAAAATGATATGAAGAGATGAG
ACGAGATGATCCAAAAAGGAAAAAGGAAAAATTGTTTCATTATCCTTTATCTTTTTTTAA
AAAAAATGCATTTACGCGTTTTTAATAGAATCATGTTTTAATGGACCTATCCAATACTTT
TGAAACGCTCTTTTTCTTTCACAATCGCGTCCACCAGGTTTCCAGACAAACAATCCTCAT
TTCACGCATACGCACACGTACTACACATCTTACCGTGTATTGCCAGACGTGTTAAATCCC
TTCATGATAAGAGTAAAGACCAAAAGTTGCTTTCATTTACACCGTTTTTCATACATTAAT
GTAAGGTCAATTTCAATTTGACATCTTCTCGTTATAACGAACACTCATCCTACAGCACGA
ATTGTTGGACACACAATATGCCATCCACTTTCGAGGATGTGAGAACCCGTACTGTAGGAG
GGAAGACCTCCTTTTATATGAAAGAAGATGGGGTACACAGATGGCGAATACCTGGGTGGT
TAAAGTTTCCTGCACTCCCCTCAAAATGAGGGCACCCACTCAACGAGGCATAAATGACAA
GAGACTATGTAGCGGCATTTGACAAATTAGCAGATTTCGCACCTTGATTTTGCTAATTAT
ATGCCTCGTTAATCGGCGTTTAACCTTTTTCTTGGAAGTTTGGTACTTGGTTTCCCTTGG
GCCCATGCGATTGATTAGTAGCTCATCGTTAATTCGTCTTTTTGGGTGGGGAATATTGCG
GAGTCTACCAATGAAGCGCAGTCAAGGGCAATACAAGTAGGAAAAGTAGTGCGGTAGGAA
TCTCTCTATTCGTTGATTAAGGAGGGGAAGAGGGGTAGCGACGAAAAGTGGCATTTGTTG
ATTTCCTTGAGCATAAGAGCGAAAAGCTAAGAAAACGCTTGCTAAGTGTGAAGGGTTTAT
AAGCACTGCAGAATGGAGAATTGATTATTGTGAAATTTTTAGAGAAATTTCAATAGCTCT
ACAAAGAAATATCCACCCTTTTCGATATCAAAGCAAACGTCCATCCCTCAAGAAAAAAAT
CGCACACATTCCTAGACTACATTAGACAAAACATCTCCACTTTTACCGCCAATTTTGATA
ATGAAAAAAGCACAATTCGTACTGTGGACTGTCCAGATTCCTTAATTAGCAGAGAAAAAA
GTGGGGAAACGATGGGAAAAGCGGTTTAAGGTGGAAGAACGCAGCCGCGTAATTCGTCTT
GCTGCGATACAGGTATAGAGAAGGAAGTAGGAAGGAAAGGAGAAGAATAGCAAAGGGAAA
TGAATGCAAAGGTAAAGTTGAAAGAGTGTTTATAAGGAGATAAAAAGAAACAAAATAAAA
TTAGAAAAAATTGACTAGGAGATTTTTAGATCGAAAATATTATTATTGCTATTCTAATTA
TCAGCGGTTTGTTTGTTTTTTTTTTTCGGCTTCATTTTAGGGTTGTGTGTCGGCTTGCGG
AAGCACGTGTATTAACGGTGCGAAAAAAAAAAAACACTGGGAATTTTTAATAAGCCCTGT
AAAATGTCTGTATCTTGAATTAAGACAGTGGTTTGAGACAATGGTTTTTTTCAAGCATAC
TAATAAACATGAGTCTTTATACTGTTCAGAAATGAACCTTTATGCTGTTAACAGTGAATA
TGTTTTATGTTTCGAAAATACTTTTCGCTATAACACTAATAAAAGTCCATAAAACGCTCA
TTATGAGTCGTGGATTCAGAGAGGCTGCTTCTTTCCCACCATGTTTTGTATATTTCAATT
GGGTAAAGGCAAGTCTGTTTTGAAAATTGTAAAGGCTAAAATGAAATATTCTAGTATGGA
TTTATTAACGTTGGATCCTTTAAAGTTGGTTTCTTATATTTTATTTTATTTTTTAGTTTT
TCTTTAATTTAATTGTTTTTTTTTTTGGGGGATATTTATTTTGTTTATTTATTTATTTTT
AAATTCCTATCGTTTTATTTAATTGTATCAATTGTTAATATTCTTTTTTTCTAAATTTTA
TTATGTATATAAATTCATTTTACAATACCATTCACAATTTACAAAAATTTACCTCTTACA
AAAAAACTGCTGCTCATTTACTAGTTATTTTAATATTTTTTTTTTTTTTTTCTCTTTTTC
TTACTAATTTTAGGTTCACTCTACTCTCCCAATGTACCGTGGATTTTTATTGCCTTTAGC
TATTAATTTCTATATTTTACAGAGTCGTACATCTACAAAAGTTGTTGCACTTTATGTGTA
AATTATCGCTAAAGTGAAAGAATAATTCTTGTATTATTTTGAATGAAAATCAATTTTATA
CATACGAGCAAAGTAGAAATGATACATTATTAAACGGCTAATTATGGTTGTTGGAAAGAT
TGGAAGAGGTAGGGAAAGGAATTGAGAGAAATAATAGAACGAGATTTTCGCGTATTTCGA
TGGATTGATCGGCCAGCTTGATTCACTTGGAAATCGGTTTAGCTTTTTTAGACTGAAAAA
TCGTACTACAATTGAAATTGAGTTTTACTTTGCATGAAATAGGACATTCCAAATTTCAAG
TCGTGTTCTTTATGGCTTTCTCCTTATGGCGTGAACGAGCATGGCTAAGGAAACGCAGGT
TCAGGCGTGGCGAATGTGGGTCGGAATTGTAAACATCCTTAAAGCAGAAAACGGAATCAA
ACAAAAAACAATTAAATACAGGTGTGTAAAAGAGTAAACAGAATTTTCATAGAGGAACAA
AAGGATGAGAAGGTGAAAATAAGGAAAATGTGAGGAAATAAAAAGTAAAAAAAAATTTAA
AAAAAATTTTAAACCAAAACAATCAAACCGAAATTAGTTGGAGGAGGTTGTGTATGATTC
TTGGCTTGGTCGGGTACGAGACTTTTCCACTTCATTTTCATTAAATGGATCTTGGCGGGC
AACAGGCTCATGAACGTCGTTGTTCGCACTGGAAGAGAGGTCTTCAGAATCGGAATTGGA
ATCAGCGTGCTCCAAATATCTGGCTGATTCGCCCTTTGGACGAGTCTCCTCGCGCTCCAC
TTCTTTGGCTTCTGCCATTTCCGACAAATTCTTGGGACGTGACATCCAGGGTTTGGCGTC
AGAGAGATAGAGTTCGTTAATTTCTTCCAAGGTAAGACCCTTGGACTCGTGAGCAAACAA
GAACGTTACGATGGAGGCACAAAGGTTGCACGATGCAAAGATGTAACCATACTTGAATCC
AATGGAGTTGGTGATAAATGGAGTGAAGAAGGAAATCAAGAAATTCCAAAGCCAATTACT
AGTTGTCGCAACGGCAGCACACTTGGAACGATAACGAATGGGATACGATTCACCAACGAT
AACGTATGCGGCAGGACCCCAAGTTTGAGCAAAACTGAAAATGAAAAGACATGAGAACAC
AATCATAACGGCACCGGCACGATGGTTTGAGGTACCATTCTTACGAGTAAGAGCACGATT
ACCAACAGCTGCATAGATGAAGAAACAAATGGATTGCCAAACACCACCGATGATCAATGG
AACACGACGTCCGCAATATTCAAGTACGAAAAGACCACCAAACGTACATCCAAAGTTAAC
GGCATCAAGAATCAATGAGGCCAAGTAAGGAGATTCCATACCGGTTCCCTTGAACACTTG
GGTACCGTAGTAGAAATAATAGTTGCAACCGGTCAATTGGTTAAAGGACATAATAGCCAT
TCCCAAAAATGTTCTGTATCTGATTTCCTTACCAAAAATCTCTGGCCATGTGCATGGACC
ACCCTCGACGGCGGCTTCACAGTCCGACTTGATTTGCTTGTATTCCGTTTGAATGATGTC
CGAATCGGGAGGAAGCTCAGCGTTCTTACACATAACCTGGATTGCCTCATCATCCTTACC
AATGGACACAAGATAACGAGGAGATTCCGACAAGAATGAGACACCGACAAGGGTGATGAT
ACCCCAGAGCAAGTTAATACCGATGGATACACGCCATTGAGCAGTTTTATAAAGTTTGTG
GGTACCCATGTTGATACAAGCGGCAATGAAAATACCAGCTGTAACACACAATTGATAGGT
AACGACAATGGTACCACGAATATGGGGAGGAGCCACTTCAGATTGGTAACCGGGAGCAAG
CACAGACAAGGCACCGATTCCTAGACCGGTCCAAATCTTAGCAACCATGATTTGGACCCA
GGATGGAACAGCGGTGACTTGAATGATAACGCCGATGAGGTAAATAACACAGAACCCAAT
AATGGAATTACGCTTACCAATTCGATCAGTAGTGGGAGAAGAAATTAAACAGCCGAAGAA
AGAACCAACGTTGACCATACCAGTAATTAAACCTTGCCGCGCTGAAGAATACGAATACGT
GTCAGTCACCGGATTATACCGATCTGCGAAACGAGATTGAAAGTCTCGCATATTGGTGAT
ACCACCAATGGAACCCGTGTCAGCACCGAACATCCATCCGGCCATGGACACAAACAACAG
CATCGTAATGGTCAATGTCTTACTCATTTTGCCTTAGGTAAAGAGAAGAAAGGAAGAAGG
AAAGAAAAAAAGACCAACAACGATGTTGTGAAGTTAAAGGATATTTTGTTTTTAAGACTT
TGTAGGCTCTGCCTGAAGAATTCCTAAGTATTTGAAAATAGGAATGTAATTCTCAATAGG
AAGAGAGAAAAAGAAAGTCGCGAATTTAAGTGAGAAAAGAGAAGAAAAAACAAATAGAAA
ATGAAAAAAAAAGAGTTTCTTTATTGGAATTATTTCTTTGGTATTGTTTTGTTTTGTTTT
GTTTTGTTTTTTTCAAAATCCTATTTTCGTTCGATCAAATGCAAGACAAAAATTCCTAGT
ATCTTGTGAAAAGATCGTAAACAAATGGGTATGCGATTATACTGCTTCCACGCTTACGCT
TTTACGCTTACGATTGTTGGATTGGAATAGGCAGTTGAATGAGAGAGAATGGGAATCAAC
CAAAGATACAGCCACAAGAAGCAAAAAAAAAAAGAAATTGCAGGTGTATTGGTATGGTGT
GATATGTACCGCTAGTGTGAATTAACCTTGAAAACGAATTCAACGAAAACTGTGATCACA
AATAAGAAAAACGATCCTTGTTCAGCAGGGTATATATATACCTGTGAGGTTAGGATTGAT
ATTATACCTGCGAAGGGTAAGTTTAGGAAAGATCAGAGAATGTAGCTCGAAAGATGCCTT
TACCTTCCAACTTTTTCACACTTTATATATGTTATGGAATAGAGCCTCCAACTCAACCAA
ATGCGGGGATACTGCAAATTCAATCTACCATTTCTACGTAGTATTGTTTAGCTTTTCATA
TCAACCTGGGTCGAGACACTTAGTGTGCAAAATAGTCATCCTAAACAAACTTTCCACAAC
ACCCTTTAGGAAGTGTAATGTTGCATACCAAGCCCAAATCCATTCACTTCCTCTATGCCT
GTTAAACTCAAACGCAAATTTGCCTACCAACGATGCGGGACACCAGTCCAAATGGTTGTG
AGAATTTAGTAGGGAACAAGTTACTATACGTAAGGGTCGATGCTGCAGCCCCAACTCCCC
GCTAACTATGGCTGGGCAGAAAAAGTCTGGGGCAATAGTAGTAGAAAGTTAGTTAATCGG
TTGAGTGGGATGAATGGGATTTGAGAGAAAGGTTATGGGTATGAAAGTGGTGGATAGAGA
GTGAAAAAAAAAGGTTAGAGGAAAAGTAGAAAAATAGAGAAGGAAAGTAGATAAGAAAAA
TAATCAATAAAGGTAGGGCAAGACAGGGTTAAACGAAAAGGTGATAGTTTGAACATTGTT
TACATGAAAAGAAAAAAAAAAGGCGACCGTTGTATGAACATTTTTGTCGATCGATCGATC
AATCGATCAATCGATTCTCCTACCTACCAACCACCCACTTCCAACTATTCCTCTCTACCT
TACTCCCCTATACCTTATCCTTTGCATCGGAGGGTTTTCCTCGGTTAGTGGGCAAGAAAA
TCCATGGTGACCACGTTATAGAGTGGGGTTCCTTCATGATGGCGTGTTACATGGGGTTTT
GGGGTATGAGCCTATTACACCCAAAGCATTATGCTTTGATACGTTGTCACAACCCCGCTC
ATTACTTCCACTCGGTTGGCAGGACGAATGATCGTTGGCTAAGCGATCGTTTAGGTGCGG
AGAAGAAGGATCGCTTCTGCCATAGTGATTGCGGCACCTCTTTAGTAGTAACTTAAAAAA
AAACAAAGTTTCGCTATGGGAAGATGATGAAATTCGCTAAAGACAAGTTTCCGGAAAATC
CAATGATTGGTGATGTTGAAAAGCGGGGATTGCCATGCATTGATGCAAATCGCCTAATGC
AAATTTTCCGTCCAATTCACCATTAGCTCATCCAGGTAAGATGTCTGAACACACATCGGA
TCACCTCCACCAATGTTTGCTTTAGGTAAACACTCCCATCGAATGAGAAAAGGGTTGTTG
ACAACTAAACTTTGCTGTGCACCGGGGAAGTTGCGGGGCCTGTAAATTTGACAGTAGCGG
AAAAACTTCAAAGGACTGAAGGTTTGAGAAATAAGCTTTTCTCCAGTCATGCAGAAAACG
AAATAAAAACGCACAGTTTCGCCGGGTTTCCTTCGGGTTCCTTTCCTTTGGCTTTTACAA
CATTCTCGTCTTGACATCATCACGAACCAACTCTCGATCCAATTTAAGGTAAAAACGAAT
GTGTGGGTCCAATGCGGGCAACGCAAAATGACTGTTGCGTAGGATAAAGTTGGCGCTTGA
AAAGTATCATTGTGTTTACTGTGAGATACTGTAAAGCATTTAAGGTGATGGATGGTAAAT
GAGCGCAACGAACGGTGAATTAAGGTGAACTAAGGTGATGGTTGGTAAAACGTAAACAAT
AGATAGTGAAACTGTGGGATACTATAAATCAACATTACAACTGCAACAAGAAATGTTCTT
TGGCCATCATTAACACAATACGTCAAATACACACTAAGAGGACGAAACCCTGTTCATCCT
CCCTGGGGTGGGGGGAGGGGGGATAGGTAATGTCGAAGAAAAGAAAAGAAAAAAAAAAAA
AAATAGCAAAAAGAAAAGAAAAAAAAAATTTTTTTTCTTTTTCTTAATCTTTTTGCTAGT
TTTTCTTTCTATGTGAAGGGAGCGGACGAGTGTCCTTTCTTCAACCGTCTTTTCTTTCTT
CCCTTTTGATCAATCATCATAAATGGATGGATACACGTACCCCCTCGTTGCATGGTGAAA
AAAAAAATTTCCTCCCCCCAAAAGGCTTACACATGTGTTTGTGCTAAGTAGGTGAATTTT
TGCAAAATTTTTTACCCCTTCCTCTCTCTTTCTTTTGTTTTGTTGTATTTTCTTTTGTAT
TCATTTAGTTTTATTAAACTCGTTATTTGCTTTGCTTGGCATCTCTTGACTGCGTAAACT
TTATTTTTTTCATCTCAATCGCTACCATTTTTTCGCAAATCAAATACAAAAATTTTCATC
CTTAATCGAGTTTCATCGCGTACGTTTTGGTGATTGTTGGTCGCTTAATTTTTTTCTTTC
ACAAAATTCTTTTATGGATCTAGAAAAGAAACCTCAAGACAAAGTAGAGACTGCAGAGAT
TGACGTGAAAGAAGACCCTTTCTTAGTTACTTGGCAGTCTCCAACCGATCCTAAAAACCC
TAAAAATTGGATCTATGCTCGTAAATGGACCCAGCTAATCTTGGTTTCTGCCTTTGCTCT
CTTGGGTCCCATGGCTTCTTCCATGGTGGCTCCTTGTTTGGATCAAATTGCAGATCGTTT
TCATATCCAAAATTCTACGGAAAAGGCCCTTATTTTAAGTATATATTTGCTTGTGTTTGC
AATTTCACCCATGATTAGCGCTCCTTTATCGGAAGTTTTTGGACGTCGTATGCTATTGCA
AGTTGGAAATGTGATTTTCATAGGTAAGTCTTTCTTCTCCTTTTCACTTCTTTCCAGCTA
ACCTTTTGTCAAAGTCTTCAACATGGCATGCGGTCTTGCAAGGACAAAAGCGCAAATGTA
CATTTTTCGATTCCTCGCTGGTTTTGGTAGTGCCACTCCAATGGGTCTCGGTAGTGGAAC
GTAAGTATATATATTTTTTCCCTTAAAAGATGAAATGACTAACGTTTTCTTTATTCAGTA
TCAGTGATCTGTTCACTCCTGACGAGAGAGGAAAGGCCGTTGCAGTGATGTCCCTTGCTC
CTCTATTGGGTCCTACTATTGGCCCTGTCGTTAGCGGATTCATTGCAGAATATACAACTT
ACAAGTGGATCTTTTGGTCTACAACCATCTTCAGTGGCTTTATATTTGCCCTTTCTCTGC
CCTTGCTTGCAGAAACATATCCCAAAACTCTGCTGGGAGAAAAAGCTCGAAAGCTCAACA
AGTCTGAAAAGACAAATAAGTATCATACTGAGTGGAATCTCGAGCATATCCCTAGGCTTA
AACTTGTCACTCCAGCTTTAATGAGACCAATACGAATGCTTTTCACCCAACCTATCGTGA
TACTATGTTCTACGTATATGGCTATTCAATATGGTAGGTAAAATAGTTATACTTTCTTCA
ATGAAACACCTCAACTTACCGTTATAGGTATTCTCTATCTTGTTTTAACTACATACCCCA
CATTGTGGACCGAAGAGTATCATGAACGACCTTCCATCGCTGGCCTAAACTACATTGCTT
CGGGGATAGGCCTTATCTTTGGCAGTCAAGCATCTGGTATATTTATTGATAAAACGTTTC
GATACCTAAAACGTAGAAACAATGGAAAGATGGCACCTGAATTTCGAGTCCCCGTAATTT
TATTGGGAACTTTTTTCTTTCCAGCTGGCTTGTTTATTTATGGTTGGACTGCGCAGTATC
ACACTCACTGGATTGGTCCAGATATTGGCGCAGCCATGTTTAATATAGGTTTGATGTTAG
GCTGGCGTGGTATCCAAACTTATTTAATTGATTCTTTTATGATTTATGCAGCATCGTCGA
CAGCAGTTGCCTGTTGTGTTCGATCGATTGCTGCTTTTGCATTCCCTCTTTTTGGCCAGG
ACATGTATGATACCTTGGGATATGGATGGGGTAACTCTCTTTTGGCATTTATGTATGTTT
TTTGATGGATCATCTCTCTTTTTATCAATTTTTACTAACAGTAGATAAAGTGTATTGGGA
TCCTCCATAATTACATGTTCTTTACTTTGGTTTGGTGGAAAACGGTTACGGGCATTATCT
AGCATGGTCATTTTTAAAGACGATGTATAGGTAATCTTATTTATTTTACAGATATTTTGT
AATAATACAATAATACAATTTAATAATGGTTGGAACACTATCAACTCTATTCAATAAAAA
GTTAAAATAATGTCAAAAAAATTTGTATACGATTCAGTAAATACACATTTCTTCAAACGT
TAAGCACTAAGCAAGAGAGCTATAATTTAATTTACAACGCAATGTGATACTTTTATATTG
ACTCAAAATGTTTGAAGCGTTTTTATTTTTTCGATGAATAAAAATAATACTCACATCTCG
TTACTATGTACTACAAAGTTTTGTAAGAAAAGAGGCTTAATATTTATGGATGATGTTCGT
TGTCACATAAAATTAGATTATTAAATTGAGCGTAAAGCTAAATAAGAAAAATGGTTTTAT
AAAAAAAAAAGTTGAAAAAGGGAAAAGGCAAAGCGAAAGGATGTCATATATGAAGTTTGC
TCATTAGCTTAACAAATATACAAACCCGTGTATTAAAAAAAATATGGTGGTTCAAAAGAC
TTGATATGGTTTCCTTTGATTTAATCCCACTCTAAATTACGCTTCTTGAAAAATTCGAGT
GTGGCATCTGGACCATGGTGGGAACCAAAAGCATAAGGAAGAGGTGACAAATCGCCTGTA
GTGTCAAGGACATCATCAAAGATTTTCCAAGAGGTACGAACCTCATCATCACTAATAAAG
TGTGTATGCTTTCCATTAATGGCATCGGCAATAACCACTTCATAGGCCTTATGGATCCAT
GTATCAGGGAAAGCTTCGGGATACTTAACGTCCAAAGTCACAGGAACAATTTGACGAGAG
AAACCAGGTTGTTTAATGTGTCCCTTGAGGGCAATGAATTCCTTGGGATAAACACGAAGG
ACTAGAACATTGCTGCTATCAACGGTAGGGAACATACCTCCTTCCCTACGCTTAAAAGTG
ATACGAGCTTCAAAGTAATCGCGGTCCAAACCTTTACCGGCAGAAATGATGATGGGAATA
CCCTTCCAACGAGGTGCTTCAGAGCGAAGTTGAAGAGCACAGAATGTAGAAACTTCACTG
TCATCAGCAACACCATCCAGTTCACGATAACCGGGGACCTTTCCATTTGCACTTTTAGTG
TACTGTCCATAGACGATGTCCTCCTTGGAAACGGGATGAAGGGATTTCAAGAAGTCAACC
TTGCATTTGATGATATCTTCGGCATCTTGAGACTTTGGCTCTTCGATGCAAAGTAAGGTA
AGTAGTTGCAAAAGATGATTTTGAACGACATCGCGAAGGATACCAGCGCCCTCAAAATAA
CCTCCACGTCCCTCACAACCAAAGTCTTCACGAAAGTCGACACGAACACTTTCAATGTGT
TCACGATTCCAGATGGGCTCGAACATGGAGTTTGCAAAGCGAATTGCAGTGAATCCATCA
ATCATATCCTCGCCAAGGAAATGGTCGACTTTGAAAGTATCCTTGGCAGACCAGTGCTTG
CTGAGATCGCTGAGAATGGCATCGGCAGACTTGTAGTCGAAGCCGATGGGCTTCTCAACA
ATAAGACGAGTGACCATACCATTGGGATGAGCCTTACTCTTGATTAGCTCGGAAACGGGA
GCAAAGAGATGAGGAGGCAGAACCAAGTAAAAGATACGTGTGCATTCGGAGGCGGGAGCA
GTCTCCTTTTCAGCAATAATGCTGTTTAGCATCTCAAAAGACTCGGGCTTATCATAAGTA
CCGGGGACATACTTGTAATGCTCGACAAAGGTGTTTAAGGCCTTTTGAGAAGCACCGACA
GTATCGTCAATGGGAATATGGGCGGTGACGATTTTGTTAGCGGCCTCTTGGGACAATTTG
GAACGGGCATAGCCGATGATTTGAAAGTCCTCGGGAATAATTTTGCGGACGTAAAGGGCA
AACAAGGCCGGGAAAGTCATTTTGGTAGCGAGATCGCCGGATGCACCGAAAACAATGATG
GATAGCATTTTTGTTTAAAAAAGTTGGAAAGAAAGTGGAAAAAAAGTGTCTGAGACAAAA
GGCGAGATTAGTAGTGAAAGTAAGATTGAAAATATTTTTTCTTTTGGGTGAAAGAAAAAA
AAATTAAACAAATGAAATGATTTAAAGGAAATCCAATGAGATTTTTTCAAAAGGTCAATT
TGCGATGATAGTTTAAATTCGAAGGAAATTGTCTTGTTATCTACGAGATAGATATACTAA
ATTGTGTTAGAAAAGAGCAAAGATAAAAGACAGAAAGAAAGAGAAAAGAAGAAAAGGAGA
GAACAGGAGGGGGAGGAGAGGAGAAAAAGGTGATATTTCAGGTAATTATTATTGACAATT
GAGTTGAATATCCTTTGATGATTCACTTTGCGTCTACCCTTAACTAGCACCATTACTCAC
TACCCACTACTCACTGCCCTGCCTTACCCTGCCCTTTTTTCAAAAATCCCCGGCCCAACA
ATAAGCGAAACGAAAAAATTCGCCAACCACCTACCTAAACTCCACACGACGAATCAAAAG
CGAGTATGTTTTACAAACCAAGGTTGCTGGGGGTTCAGAAGAGGGACCATACTCTTGTAT
ATATACAACTTGAAGCAATGCTCGTGACATCAGACACGATTGGAAAGACCTTAATGCATC
TATCAACCTAACGTCTCCGCAAACATGGGACAAGGTGTAAACAAAACAAACCCAAGCCAA
ACTTCCTTTTAAGATGCGGGACTGCCCGGGGTGAGGCGGGGCGACAAGCTCTCGAACGTG
TGGCCCAGGTATGACAAGGTGTGTGAGCAAACTTTAGACTTTAGTATTTAAGCTTTGCTG
GTTACCACGCCCACAATTCCTACCGCTTCCAATGATGTGCATTGCACGATGCATGAAATG
CTCTTTTACACTTTCGGCTCTACTACGTCAATGTAGCAGTAGCCTAGCCAACTGGGCAAC
TGAGAGTAAGGACCTTAGTGGCTAGTCAGACAGACCCCGGACCAAGGAGAGGGGAACCGA
AACGCAGGTGCCAATGAATATGAGAGTTCGACGAAAAGGGGGTTACTCGGGTAATGCAAA
TCTTCAAAACATTCGATCATCCATCAATCAGCACTGAAGATTTTCCTCGCATAAGGTTTA
TGGGAAACGAGTAAAGTTTGAAGGGGGGAAGCGGGGGATCTCGGAAAAAGTAGGAATTAG
AGTAGAAGCATGGCAGAGCAAGGCAGGCGGGCGCACAGCGTAGCGTTAAAAAAATAGCGC
AGTAGGACCAAAGCACGTTACAGTTACGCTTGTTATAATTTACACAAGGAGGGATTTGCT
GTGATATACTTTATTACACACTGATATAGGCAACATAAAACCATGTACATTAAAACTTGG
GTAGTGTAAGAGATACAAAGGACTTTAATAAATTTACACTTCCATTTCGCATCTCTGTCA
TTGCACATCTAAGCCCGTTCTCAGAACCTGGAAATGCATTCCTCATATTCTTCCTACTAG
ATCCATTCTTTTTCTCAGTCTCCTTACCTTACGTATGCTTCTGGACATGTCTGGCAGAGG
AATTTTGCCTTTGTATGAAGAGGGGGAGAGATCTCGGCAATAAGGAGATGGAGCATACCT
CGTTAAAGGAAAATTAGGGCTTCGTTGTGGCTTCCCAAATGGTTGTCTTAGCAAAAGGAA
AAAAAGGTCAGCTAGGGTAGAAGCCGAAGGGCACAAAGTTGGGGCAGGAAATCTAGAAGT
TTGGAGTAAAAGGCGTTGTTTTGCTTATTAGCCAAAATTTACGAAATTGGAAATTAACAG
AGCCTTCTTTTTTAACGTACGTTTTGCATATCCCTAAGTCAGTCTAGTAAAAGCATGTAT
TTACTGTTTTGCATGGCGTTCCTCTTCCATCCTCTTTTTTCTCTACTAAGCTTTTTCTCT
TATCTCCCCTATTCCATCATAACGATAGTATTCGTATGTTAATGAGTTCGGTACATTTCG
TTCGAGATGCGGTAACTGTACTGAAATGGACAGAGGAGCTAAAACAGTCTATGTACGTGA
AATTTGTAAAGATAAATTTAGGCTTACAATTTTTGATATTGATGCAAATTATTCATTCCT
GTCACCATGTTGTTTTCTTCCATGGGTTGTGAAGAAAACCCCTCCCTTGAATTCTTGGTC
AAACACTTAGTGATCTCCTACTACTTTCCCCTAGTACCGCGGGGATATGGAATTTGGTGG
TTGCTAAATACTGAAATGCATAATATTAAATAGTACGACGCCGGACGTACTCCTGATAAC
GAAGCGACACTTGCACGCACTATTCAGTTTCAAAAGTCGCAGTAAACGTCTATACTGATA
AATGATGGGTTTGTTTCTCAAAAACGTTTAAGGAAAGCTAAGTTGGGGTGAATAAAAAAG
GCAGTGACAGAATAAATGTGTCAGAAGCAATTCACTGCCTCGTTCAGTTTTTTCGTTCTT
CTTTTTTTATGCCATTGTTTGAAGGAATTAGTTGGAAATTTGTTTGAACGATTTTATTAT
TTTGTTAAAAAGTCTTTAAAGCGATTGGAATTGGACTACAAAGTGAATATTCTTGATTTC
GCTGTTTGGTTTGTCGCAATCATAGCAATTAATTCGCGCATGTATTTTATTAAATAAAGA
ATGATTTTATTATTATGAAGAATAATTACACTTCTTTGAAAAGTCCTCTAGATGAAGAAG
ATGAATTGAAGACAGATCATGAAATCGATTTGGAAAAAGGACCCCTCCCAGAATATGATT
CAGAGGAGGAAAGTACATTGCCTCCATATTCAGGTAAGAATTGTAAATAATAAGAAAGGA
ATTACTCAATGGAAAGTTGAAACTTGCCATCTTGTCAAATTGCATGCTTTGGTCATTGTT
TACAGTCGGCCATGCAATGCACACAATTTGATACATGCTCTTTCTTTACTAAAGTATTTC
ATTATATTAATTTAAACAGATCATGCACTTGTAAATAATCCTCCTAACACACATAGAGAA
AACCATTCTTATGGGACGACAGATAATTCTTCCCCTTTGTTGATAATACTGCTAATATCA
TTCACTTCAATCATTCTATTCAATGCTCCAGAAGTTTGTTATCTAAAGTATAAGGACGCT
TTTTTTAAAAATTATGGTGCAGCGGAATGGACATTATTTGGATTTTGGTGTCTTGTTTGC
ACTTTGGCTTTAATATTCTTGACTTGTAAGTGAGACAATGGGGTTATTCTTACCTTCAGT
CACTAATTCATTAGACTTCTATGAAACTTGGACCAAGGCAGTTAAAGTAACTGTAATTTC
CTTGGCGAAATGTGTAAAGGTGACTGCAATTTTCTTGGCACAATGTGTCAAGGCTTGCGG
AAAAGGAATCAAGCACTTTTTAAAGAAGTGGGAAAACATGCCTATGGCTTTCAGTGAAGT
CTTTTTATTTAACATACTTGTCGGATCACCAAGAATGAATTTAAGATACATTTTTGGCGA
CAGATGGGGATTGAAATGTTCTTTGGCTGATCACATTATCTTTGTTGTATTGAGCATCCT
TGTTTTTATTGCTGAAACAGGTTTGTTGTTGACTAAACACTTATTTATATTAACAATACA
GTAAAACCTGGATCAATCAGGGTCAACTTGATCAGAAAGATGGGTAAATTTAAAATGATA
TCTTTTTAATTGTGTATGCTAATTATCATTAGGTTATGAGGCCAAACAGCAAGTGAATGA
ATACACAGCTGTTCCATTGCGTGAGATGAACTCCGAAAGTGAAGCCTAATTATATTGCTA
ACTTTACTAATTGTATGATAAAGGCGCTTTTTACATGAGGCTTCTTTTCTTCATAAGAAT
GTGCAATAAAGAAGCGCCTTTATGATTGTGATTTACCAAACAAATCATGATGTGTTTAGA
GTATTTCAGATGTATTTTTATTGCATGATTTCATTTCCTGACGAAATGGATGAGCAAGTG
CATTGCTTGAAAGGTTCTGTGATGTTGGAAACATGCACCGGGCATTGAAATTTTTTATTT
ATTATGACCAAGAATTTACTGATGGTGACATATGATGAATTTTCTAAGTCAAAAACAGCA
ATGCTGTAAACTGAATATCAAACAATTAATAAAATCTAAAAACGCTTACTGGAACTTATC
ATATACCCAATCACACTTGTTTTTTCTTTTTAAATATTCATTCATTCAAATCTTTTAATT
ACTCAATGGGTCTTTTTTTTACTTTTAGTTCTCCATTGCTTACTATGTACTGCGAAATTA
ATAAAGCGAAGCAAAACTCCTTTTGACAGCGTGTCAATCATTATGGGTAGCATTGTTTTG
TGCAAACTTTTAACTACGAGTTTTCTTATAATTTGTTAAATTTAGCCTAAAGACAGTTGA
CGCCAATGTGATTTATCCTTTAAACAGTTAAAGCAAAGTATGTAGCTTAAGCTTGCCGAA
AGGTATTATAAGTATTAGTATATTTACCTAAAATATATAATTACTTTGTTGCTTTTTTTT
TTTTGGAAGCAGTGCTAAAAAATGCGAATTTGTTGAAAACTGTTAAATACATTTAACATA
TTATCTAATCATCTAGTATTATCTCGAAATATCAGATGCGATAAAAGGCGGACTTTTTGT
TTTGATTATTGCACACCATGTATCCGGTGAATACTAAAAGTGCGAGTTTCAGGATGCCCT
TTTCCGGTCATGTATATATATTTTAAATACAATGTACCGAAATTTCAAGTATCCGTTCGT
TACCAGTCCAAGATTTATCTAACATGAGGCTGTTCGGTAATTCGAAGGAACAAGGTATTT
GTCAAGTTGGCGAAAGCGATGTCGCTGTTAGCGAGATCAAGAAGGATGAAGCGCTTTTAC
AAAAAATGGGATACAAACCAAAGCTTCATCGTACATACGCTTTTTTTGAGAACTTTGCTA
GCTCTTTTGCAGCATGCGACTGTATGAGCAATATTCGAGGCTCTTTTTATATCGGCCTAC
TGACTGGTGGACCTTCAGCTTACTGGATCACGTATATTATTGCAATTCCTCTCCAACTGA
TCTCTGCTGCAACAATGGCAGAGGTATGCTCTGCTCTTCCTACCGCTGGTTCTCTGTACT
TTTGGGCCTCTGCCGCAGGCGGCAAAAAGTATGGTCGTCTGATTGGATTTATAGTCGCTT
GGTGGGTAGTAGTAGCTTGGACATCATTTGTAGCTGTTAATTGCCAATCTACCACCAAGT
TTATTTTCGGTGAGTTGCCCGTCTTCAATTCTGGGTTTTCCGTCAGTTCTTCTGATGTAA
AATTTCGTGCTGTTCAATGGGCTGTTGGCGAGGCTATACTACTCGTATGTGTTTTATTAA
ACTTTATTCCTCCCAAGTGGTTTCGCTATATTTTTAGAGTATCGGTTGCAGTGATTTTGC
TTGACTTTGTTTTAAACATGATTTGGCTTCCCATTGCCGTTTCTACCAAATACGGGTTTA
GAGATGAAGCTTTTATGAAATCCACGAATTACGATCTTGGAAAAGTAAATAATGGATGGT
CTTGGTGTCTTACCTTTTTCTGCACAGCACGCATTTTGGTAGGCTATGATGCTGCAGGTC
ACGTCGCTGAAGAAACCAAAAATGCTAGCAAGACTGCCTCTCGCGGTATGTTTTACTCTG
CCTTTAGCAATGCTATTCTCAGCACTGGTATCATTGTCATGTTTTTATACTGTCTTCCTC
CTTCCAATGTTATGTATGAACTTATAAAGTCCAATTCTCAACAACCTTTTGTTAGTTTTT
ATGCGTATGCTTTGGGTAAACGAGCTCATGTTTTTATGAATGTTGTAGGTATTTTGGGAA
TGATTTTTGATACTTCGTTATCGATAGTTGCTTCAAGCCGCTTAGTATTTGCTGTTGCCC
GAGATGGCGTTTTACCATTTTCCGGGTGGTTAAGAAAGGTAGATTCACATGGTCAACCGA
CCAATGCCGTTACATTTATTTTCTTGATTTCAGCGGCACTTTTGTGCTCTAATTTGCCTA
GTGCTGTAGCTTTTACATCTTTACTGTCAGCCGCCGCTGTTCCTACTATTATGGCTTACG
CAGCTGTTGCCTTTGGTCGCCTATTTTTATCCAGAAACGATTTTCCAAAATCAGAATGGT
CTCTTGGTAAACTGTCCAAGCCATTTCAACTTATCACCTTTTTATGGAATTTATTTACCG
CCGTTATTTTATTCTCGCCAAAAGCTTATCCTGTCACAGGTAAAAATTTCAACTATGCTC
CCGTGATATTTGGTGCTATCACAATTTTTGGTCTCATTAGCTGGCTGAGTATTCCAGCCT
CCAGGTGGAGCACATTTTATGATGCCAGCAAACTCGACAGCAATAGCTTCGACGATAGCT
CTAGTGATAAGAAAAGCTTGGAAAAGGCTGCCAGTATAGCTGAAGGATCAATTACTCAGA
TTATTTAATTTTTTTCCTTGGTATTTTTTTCTGTTATTTTTGAATCCGTTTTTTTGTGGG
AATCTTGGGTTTTTGGTACGTTTTTCTTTTTTGTTTTCTTGTTTAGTTTTCATCATTTGA
ACTTCCTTGGGGATCAGCATTCATTTTTTTAATAAATTTCAAACACAAACTAATTTTGTT
GGTTCTCTATTTCCTCAAATGTTTATGTAGATTAGAGTATTATTCCCTATTGCAAATTTA
AAGTATTGAATGAACCATACTCATTGTGATAGGGTGAGTATTAAGAGCATAAATTTATTG
GGGACAAATCTATTATCGTATGAATATTGTAAAGCAAATTTAAATTGTTAAATTCTTAAA
CTTGAACAAGGAAGTCGCTTATTTACTTGTAAAAAATAAAGATTTCCTGCAATATTCAAG
TAAATCTCAAAAAGCTGGATATAATAATACTTACATAGAAAAATACGATATTTTCGTTGC
AAAAGATAAAGATTAGTGTTTTCTATTATCCTACATATTACAGTGCGAACTATTAATCAT
CATAATAAGAAAAAGTTAATAAATTTCCAAATGCGAAATATATTTACTATGTATAAAATA
TTAATGAAACATAAAAAGAAAATTAAAACTCATAAACTCGTCAACGACAAAACGAAAATG
ATAACAAGCCTTCTGAACTATTGGTAGAACACATCGTTTAATCAGAACTTATCTAATTTG
ATGCATTTTGCCTTCCATTAGCAGCTTGAAAAGAAGCGACAATATTTTTAGAAAACGTGA
ATAACTATACAATACCTATTGATTTAGGTTTAATCAGATAGAAAAAGACAAATATTGAGT
GATTTCAACATGACTGCCGTTTAAGATGAAACCAAACTAGCAATGTAAAAAGAGTGCAAA
TATATACAACCAACGTGCAATTTTATAGATTTATCCTTTATAAGCATGAGGACTACGCTG
ACGAATCCTCCTTCCCCAAAAGAAAAATATGAAAGGAATAGGAACTAAGCCACAACCAAC
AAATGCCAGAAGAGAAGTAGCCCAATGGTAATTCAAATTATTATACATTGGTCGAGCAAC
AATCGTCATTCCACCGCCAGCGGCATAACGAGTAAATGTAGCTACGGATAATGCACTAGC
CGCCATCTCATGGTAGCAATCCACCAAATAACTATAGCATACAGCAAGAACATACAAAAA
GCCCCATCCCAGAAAAATACCACTAACCATGGGTGCAGCCCAATGAACCGAAGGGTAGCA
CGTCCAGCCTAACCAAAACAACGCAATGGGAATAAAGAATGAACCGAAGAATAGAGGAAA
CAGTCTATCTTCCGGACAAATATTTCCATCTCTCATTTCATAACGACGTCTGTAATGAAC
ATAAATAATAGGAGTTAAAGCAAGACCAAGTAAAATGCCGACCAGAATTCCAAGAATAGC
CAAACCAACTTCACCGGCGTTAAAACCGTATTGGTAAAAAATAAGGGGGTAACCAACCAT
GCAAATATACAAAAGAATATTGATGAATACCAAGTACATGCAAAATGCTTGGACAATGGG
TTCAGTACACAACAATCGCACACCTCTCGTCAAAGCCGTCCTAATTGCATAGGCAGGATC
CCTTTGATGCTCATGCTCGTTGTACCATTTGTCACAATTTGTTTTTTTACGCAAGTAACG
AGCCTTGAAATCCAACAACGTTTCACTATGGGTTTCTGGCATCGTGAAACAAACGATTAC
CCATGTCAAACCAGCCCAAATCATGTTGATCCAAAAATCCCAGCGCCAACCAAGCTTGCT
TTCTGTAATATATCCACCCATTACGGGACCAACTAAAGGACCAACAAATGCGGCAGCACA
GAACACTAAAAGGGCACCAGTTCGCTGAATTGGGTTGAAGAGATCGCTAATAGTACCACC
ACAGGCTGACATAGGTGTACAACCGAAAAATCCGTGAAAAAAGCGGAAAATAACAAGACT
CCAAATATTTTTGGAACATCCACCACCAATTTGGAAAACAACAAAAATAACTAACGTAAC
TGAGTAAAGAGGAAGTCTACCATACACTTCACTTAAAGGTGCAAATAAAACAGAACCAGC
TGCAAAACCAAGCAAAAAGGTAGCCGAGCAGAGATCTCCCACAGTAGCACCAACATGATA
TTGTTGTGCAGCAATGCCACCACCGTCAGAAAAGATACTAGAGTTGGCTGTAATGACAAT
AGCGATAAAGGATGCAACCAAAAGTGTATAGATTTTTTTCCACATTGGCCAATTCTTAGG
GGCTAAAGGATCCTTACCAGATTCCCATTCGACCTGATAACTATCCTCTCCACTATCATC
TTCAGTATCCGAGGTAGTATTATCTGAAGATCGAGTATTGTTAGTAGAAGTTAAATCTTC
CTCGTCACTAGAATTCGGATTGGATTCAACCTTCTCACGTTCTCTGTGAAATGGCAAGTT
TCGATCATTACCAAGATACCTCTTCTCATTTTCAATTGCACGAGATTTTGCATTGTATGC
CTCGAGATTTAAATGTCGGTACTTATACCCAGTTATTAAGAAAATGTAATCCATGTTCGT
CAAAAACTCAAGAGGATTAGATAAGCTGTATGGAATAACAAAAATAATAAAATCAATAAC
TATAAAGAGACTTCAACTTGAAAGGTATGCTTAGCGAGTTTACAGTATGTACCCACTAAC
AGTGAAAATTTACAAACGATTGTTGATGATGAACAAAGTAAGAATGCAGAAACCAATTGA
GGGTGAAACAAAATGATAAAATCCAGTCGTTAAAAAAATCCGGCGCAGTGAGCAAAAAGT
ACGATCGCCGACGTGGGATTGATAAAAAAAAACAAGTTTAGTTACTTGGGAATAGGTTAA
TGCCAGATGCAAGTAAACTTCTCAAAGAAACGTAAGAAGAGAGTTTAAGCCGTTGTCAGT
AATATATAAACAACAAACACTAAGCAATGCGTGAATAAAAACAAATAAAGTTGAGGTAAA
GCGAGATGTGCTAAAAGTGAAAAAAATTGGATAAGATTATAATCCAAATAAGCACAAATA
TCTTTTCGAGAAAATCCTTCAACGACTAGTGGATTTTCAAAAACAAAGTTTCAAAAATAA
TTTTAAAATATTTAACGTTTTTGAAAAAAGATTATGACAACCAAAGTTACACTCTCCAGT
CAATAGAGTATAGGAATCAGAAAACAAAACGAACAAGCAAACTAAACGAAGCCAAGGAAG
GAACAAAGCAGATAACAGACGGGATACTATGTTGCCTTTGATGAATGGGGTGAAATATAA
TGCGAGGTAAACCTTCTGAGCAAAAAAGAAAGTAAATAATATAATCGATTTCTTTGTCAC
TGCTAAAAGGTACGTAATAATTTAAAATATAAAGATATGTATATATACCATGTATGAATA
TACAAACAAGGAAAATAGAATGATAGCAACTAAATTATAAAAACGTTGCAATGGAAAGCG
AACTAAGCGATATAAAGAAAGGGAAATGGTAAAGTTATCGAGGGAGACCAAGGAAGTACT
TAACACCAAATAAAAGTGAAAGTTTGTAGATAAATAGTGTAAACACACGAATGTTTCACT
TGGTTGACCAAACTTTAAAAACTAAAAAAAAGTAACGGTTGGAGAGCGTACTTTAAGAAA
GAAAGGAAAAAGGGGGGAAGAAAGATAAGAGAAGAAGAAAATAAAGAAAGTAATATATTT
ATAACACTAATTGCGAGCGATGCATTCAGCAATGGTGAATTGAAAGTCAATGTTTACCAA
ACCGGGCAACTTTTTTGTAGAAGCAACGATCTTAGGAAAAACGTTGATGACGATTTTCTT
TTTTCCAAATCCTTTAAACAGAAAACCAACTTGTAGCGTTGTCGTCTGTTTTACACAATC
TACAAAGCTGAAATGACCAAGTAGAATGAACGAAAAGAGAAAAAAGTTGCTCTCGAAATA
AAAAATAAAAGAACCCAACAAAAAGAAAACTGAGTTAGGGAAAGGGATTAAAAGAATAAT
AAAAAAAAGTCTTGAAAAGAGATAAAGGGGTTTTCAAGACAGAGGAGAAAAAAAAAGTAC
AATGGTGATTAAAACAACCAAGCGATGCAGAAGATTTTAGATAACTAAGAAAAACAAGGA
CCAAAAGGGAGGTACACAGTAACTAAGATCCAACGTAGTAAGGAGAAAAAGAGTGAAAAA
GATTAGTAACAACTAAAAAAAAAAGAGAGAGAGAGAAAAGTCAAGAGTTTTGTAAAACAG
GTGTAAGTAAACTTGAGCAAAACCACCTTTACTTGAAGAAACGATGGAAGTTGATGGCAG
ATGGGAGCAAACAGGTAGACGACAACTTAGCTACTACCAAACCTGATTTACCTTTGAGTT
AGAGGAGGGATGGCAGCACATATAAAGGAATTGACCAGGAGAATGCAGGCCAAATATTGC
TTGACCTGTTAGAAACAAACTAGTCAAACATTTAATGTTTACGTCAACCCCCTGCTAATG
AGAAAGATAGTAGATGAAACAAAGTTCGGTTACATGATCACCGAAGGTCAACCGTGATCT
CATGGCAAGTAACAATGTACGTCGGGAGGAGAGAGTTTAGTTGAATTGGGTTTCTCAGAG
AAGCAACACAATGAATGATTGGCTAGAAGGAAAAAAATCCACCAATGGAGAATCGGTCTA
GAACCGGCAATCCAGTCTAAACGCGGGGGGACCAGTCGATGTGATCATAGAAAAAGAAGC
ATAAATGCCGAGGTCATGACGAAATCCTAGTAAGGAAGACTGGTGTGTTGGAAGGAGAGA
GTGCATGTGATTGGTTAATCTCTTGATAGCCTGCCAGGGCAACGAGAAGATGCTACAAGT
ACCGTGATCCTCGTTTCTCAACGGTGATTGGGTAGGAGAGCCAGTCTCGAGTGATGAATG
GCTGGTCACAGTAATCGATTTGTGGGGTAAAAGGACCCAAGGGTCGAGACCCCTCCATAC
CCAGTGCTTTGCGCGATGGAGGAGATGAGTGCGATGCGATGTGTTACTCAAAAATAAAGA
CGTGGGTGGCAATCACCTAAAGCGGAATAGTGTGAAGGGGGGAGGCCAACAGAGAGAAGG
GGAATGGAGAGTAAGAGGCCAAAGTAGAGTGGAAGAAAGATGCATAAGGGGGGAAGTGTA
GCGTAGGCAATGCAGTGTCGTTGGTTATAGCTGAGGAGATAGCGGAGAAAGGAATAAAGT
AAGACGTCGACAAGATGCCGATTTGATGAATCAAGCGATGAGATTAATGGATGGGTTGGG
GTATAAACAATTGTTTGATTGATCCCAACAAAATGCGCCTGTGCCTTTTACTACTCCACC
TTTATAATGCTAAAGGAGGAGAAGTAATAAGATGGCACGTTTATTTTTTGGGCCGCCACT
GGAATGTGGAATTGTTTGTATAGGTATGGATGGATCACCCAGTATATCTGATTACTTGAA
TTGCAAGTTTTTGCCATCAAGATGGTTTTACAATCCGTTGCTTTTCCGGCTCTAGTATTT
TGATTGATCGTTTGTTTGATGCTTCGTTTGACTGCTGCTTATGTTGCTTGTGTTGCTGCC
CATACCCAAAAAACCGGCGCTTAACCAAATGTAAACAAAAAGCGCATCTCTGTCATTTGG
GTTATTGGACAATAAAGACGAATTGTTTATTGTTGAAATATTTATTCTAGGATAAAAAAA
CAAAAGAGTTTGTCAAGGATGAGCTTTGTAAAAAAATAAATCGCTTTCTCATGCATCAAA
TCGATGGATAAACACTTCACTGCAAAAATGAAATATCGGTTGGATATATGACAAACACTG
AAATACAATGAAGAATTCCCCATGTTTATGAATACAATCCGTCTTTTCTTTTTTTTTCAA
TCACACATACTCTTTCTCTCTCTCATACACTCTCTATCCACTGCGTTCCGCTCCGTTGTG
CGTTTACCATATGCAAGCAGAAAGCGTTGAGAAAACACAAAATGCCCCCAAATTTAACAT
TTAGACATGCAGCTGAACCGTAGCAATAAAAACTTAGCTAGGCGAAACGTGCCATACAGT
AAAGTGTTTTATCTCCATTCATTGAAAACATCAGTAAGGACGAAAAGAATAAATCTAAAA
AATATTCATTCATATCTAAACGCTGAAAATTGCAATGATAAAAAAAATTTTTTTTTTCTC
TCCAAAACTATTTCATTCACTAATTTTGTTGCATCAAATCATCTTAATAAAAAAATTCCC
ATAAGATTAGATAAATTGAATGGATTGACGTTGTTAACGAAAAAAAATTTTTTTTTTTTT
TTTTTTTTTTTCACCACCATAACTTATAGCCAGTCATTACGTTATACGCTTTTGCTTATC
GTCTTTCTTTTTTTTTAAAAAAAAAATTGAAAAAATTTATCTTTTATTTTTGTTTTTTTT
ATTTCCAAGGTTTTGTTCCTTTTAGTTGTACATTGGGTAGATTGACATGTTGATGATCAG
TTGTGCATCGTATTTGTATTATTCGTAATTGAATTCGAATCAATAAATGATCCCCTTTTT
TGTCCTTTGCCTTTCTTTCTTACCTTCTAAATTTAAACTGGTTTTGCTCATTGTTAGGCA
AACCCATTCCTATCATCCACACTACAAGTATGTAGCTAATTATATTAAAAAGCCAAATAG
TGTATATGATTCTACTTTAGTTAAAAGTTGTTATTTTAAGTTAAAAGAATAGTAACGTAA
TCTTTTGACGTTAGCTACGCAGTTTCGTATTTGATTAAACGATACGTAGGACTGCGGTGA
GTTTTCCTTGTGATTTAATATATTAGTGTAGTATAGCTGACATTGCCCTCCCCAAAATTT
TCTATGTAAATCTGAGGATAAGTCATATGTTCTCAGATATTTAGATTATTGGTTTTAATA
TAATCGTTAACAATTGCTTTGTCCGCTTGTAACGATGTAGCTAATATAGTCCATCCTGCT
ATAATAGTACTTGGATTGAGATTCGAAATGTACTTAACATTTAGATAGAGTACCTGTTCT
CTATTTTTATGGTCTAGGATATGAAGAATTGTTCCAATATCAGACTCATCAATGGTAGCG
TAGTTGAGTTCTGAATCATGTCAATACTTTTCTAGGTGAGAAGCATGAAAAGTAGATGGA
AACATGTGTTTGATTGATTCTGGAAGATCCAATTCATAGTTATTTGGGCCCGAATTCTGT
AACACAGAGAACGGTCCTGCAAAACTAGGTGCTAATTTATTGGATTTGTGAAGAAAACCT
GTGTTCGTTCTTTTAACCATAACTAGGTCTCTAGGTTGAAATTCTTCGATTTCTTGTATT
TTCATATTGAAATACTTTTTCACCTTTATGTTGTTTGTATTCAAGTGTTCTTTAACTGTT
TGAAATACTCGGATCGTTTCCTGAGAGGTTTCATCAGTTTTGTCACTAAAGCTAGGTAAT
TCTAAGGGTGATAAAGCTGGTGAATAGCGATGTGCTATCTCAAAAGGTGTCATTTGAGTA
GCTGAATGTATCGCATTATTGTAAGATTGTTGCACTAGAGATATATGATCTACCCATGTA
TTTGGATGTCTGCTACATACACATCTTAGTAATTGCTCCACAGTTTGGTTTGTACGTTCA
GTTCGTCCATCAGTTTGTGTTCTGTATGGTAACGCAAATTTCATGACGAAATTATATTTA
TGTGCGAAGTCTTTCCACGATTGGGAAGTAAAAATATGATCATTATCTGCGATGATTTCT
TTTGGATTGTTGAAATAAGCAATAACTCGTTGATCAAACATTCAAGCTGTTTGTTCTGCT
GTAATGGATTTCGTACAAGGTAATAAGATTGCCATTTTTGAAAAAACGGTTAACTACCAT
AAAAAGTGCATTATAACCGGATGATTCTGGTAAGGCTGTAATAAAATCCATTGATAAAGA
TTCCCAAGGTCTTTCTGATGGGGAAATTGGGTGTAAGGGTCCATAAGGTTTATGATTTCT
AGATTTGTTTATTTGACATGTATGGCAATTCTGTACAATTCTTGTACTTGTTTTCTTAGA
CCTTTCCACGTAAATCTACGTAATATAGTGCTTGTAACAAGTTCAATGCTTGGATGAATC
AATTTCCCTTCTTCATGATACTTTTTAATAATTGTCCTAGTCAGCTGAGTATCATTAGGT
AATAAGATTTGGCCTTTACTGTTAAATAGTAAGCCATCCTTAAGTTGCATATTCTCTTCC
ACTCGCTTGTCTTCATTGTTTAGTAAATTTAGCAATTTTGTATCATTTGTATATTCTGTA
ACCACTTGATTTTTAAAGTCATCTGTTATTGAGATTTGGTTCACAGAGTTTATATTATTG
TCTTCTGAATCTTCTGGGATTGGTTCTGTTTCATCAATAATTCTGGATAAGGCATCAGCT
ATGAGGTTTGCCGATCCAGGTCTGTAGTTAATCTTAAAGCTAAAGTCTTGTAAAAATAGT
TGCCAACGAGCTAAACGTTTGTTTTCAGGCTCAGATTCGTTAGTAATGTAACCAATTAAG
TTGCGGTGGTCTGTTAAAATGTTGAAAGGTTCGATAGTGGATCCCAAATAGTGTCTACAG
TGTTTGAGAGACTTAATGATTGCAAACATTTATTTGTCCGATACGCTGTAATTCCATTGT
GCTTAGACATCTTTGCTAAATAGCATCCAACAGGACTGTACTTATCAGATAATTAAGTGT
ATTCTTAATCTCAACTGAGGATAATACCTTGCCCTTTATACTTTAACACTTTCCACACCA
TGGTGTGTGTTTAGTAGCGACATATTGCACACCATTTGTGAAAAGGTAGAAAGCTAAGGC
TACACCATACCTTGACCAGCTGTTATCATTAATAGTATCTGGCTTGTTGCCTGAACGTCT
GCTCAATTGTATGCTAGAGTCAGTGACAACGTCAAGATCAGTATCATAGTACTCTGAACT
CTGACCATCATAATCTTCTGGGAGACCATAACCGAAATAGTCATAATGTTCCTGTAACTG
TAATTCTGAGTGCGATCCACTGACTGCATAGACATTATGTGTTACTAATGCAACATTAGC
TCTGTCATCATAGTTATTGATACACTGCCTTAATAAATTTTCCATTTCATCACTAATTGT
ATAGTTATTATTATTATAGCCATCAACGGACACCCAGTAATATTTTTGCCCCAGATAGGC
AATTTGATCTATCACTGCCCTCTGCTCAAGAATCGTCGTAGTACAATTAACGACTGCTTG
AAGATCATCATCTGTAAGATTATAACTACTCTTTCTTAGTAGTACTTTATCGCTAACTTG
TTCTAAAGTGTGATATGCCAGAGACAACATAAGACCTCCAACAGTTGTAATATATAGATA
ATCGTCTTCATCAAGTACGAAAACTAAACTTATAATGCTGTTAATAGTTAAAATAGTTTT
TTCCCTTAGAACCCAGAAGAAGAGAAATATATATATTTATAATCAATAATTCCTTTTTCT
TGAAAAGAATTAATTTTAGTTAGCGTAATGTAGTATCGCTGACAGTTAAAATCAAATCTT
GTATTTCCTTTATTCTCGAAATTGTCAGCTACGCCGTTTGGTATCTATTTTGACGATACA
TAGAACCACGGTGAGTTTTCCTTGTGATCTATTATATTACAATACACAGGTTGTATAAGT
AGCAACTGAGTATAGGTATTGTATTAACTGGGTTATAATGTTACCTATCACTAATATAGC
TCATAACTGAACTGAGGAACGAGATTCAGCAGTAGCTCTATTTATAGTATTCAGATAATA
TTGATCTTAATAGATTATCATTAAGATTAATCTCCATATCGTATCATACATGGTACGATA
TATAATTAGAACATGTGACATATAGTGATACGCAACGTAGTATATCATAGCGTAGTGTAG
TATTGCTGACAAATAAAACGAATTATCGTTTATTCCTTATAATATCGATATTATATAAAA
ACATAAGACAATAAATTCTAAAGGATATCGAGTTATATCAAACCTACAAAAAAAATAGTG
AAACGGAACCCTTGAAGGAAAAATGAGACAAAATCACTATATTGATCTTGATAATGTAGA
CTTGAGATTGTAATTTATATATCAACATGAGAATGAAATACAGCATATACAAAAGTCAAG
GGTGTCGTTGAAAGCATGATAAGAGCTAAAGACATTCGTTTCTGTCTTTTCTCACTCATC
TTATAATCAAATTCATCTTTCCAAAAACTTACTAATCTTCCAACCATTTTACGTACCGCG
GTCGTAGTTAATTTTTTAAAGCTATTTTCCTCGGCACCATTTCCGGGTAGTAAAAGTTAT
TGTTTCACCACTCGCGTGATCCAACAGCAGTTGTTTTAACGAGAACAGAGCTTTATTGTA
CATAGGCGGCATGATTTGTTGCCACTTATATGCGGTAATAATCGGTCTAAAAATGAGGCT
TGAAATTTAAGGTAAAAGGAAATATGCTAAGGATGTTATACCATACAAAAGTTTGTTAAG
AGACATCACTGTAAAGAAGATTTCTAGCTAACCTTTTTATCCAATTGACCCATTCATGTT
TACTTAACCTGCGGATAAAACGCATGAATATTCAGTTTAGCATCAGCACAGACATCAATG
CTATCTACAATGACAAAATTCAATGCATGCAACCTACCAACTTTGGCTGCAAATACTTTG
GATATTTGCAGTTTAGAGCTCTACTACTAGCAATCTATGGTTAATTAAACGAATCAAACT
GTTCATAAAAATTAATTCTGCATCTTTTTTGCCTTTCTTTTGAGAGCTCACTTAGCCTAA
CGTCTTTTGATATACTTTTTATCTCTTGACACCCGGCTTTTCGGCCGTCTTTACTGTGCC
ACTTCAAACCATTTCATACGAAGAATACAAATATTCTGGTTAACCCATTCAAGTAGGATT
GTTTTGAATAATACCGTCATTTCCGAGATGCCATTAACCCCAGCTTTCGCACGAAAGAAT
GGATTTAGTATTCCAGACAATAGAATAATTATCCTTAATTATAACATACGTTTGTTTCTA
AATAACGGTCCTAGTAACATGATACTTATTACTATATTCTTATAGAAGTTTTAAAAGATA
TTAGTATACCACTGTTTGGTTTGAAAAGATATACCAATGTATCGGTTTATAATGCAAAAA
AAATATTTAATGCAGCTTTACGCTCCAGTAAATTGTCTAAATACTTCATTTATCATTTGA
AAGACGAAGAATAATTCGTATTTTGAATATCTAATAATCCAGTTTCCTAAATATTACTTC
TCTCGAACAACAAGAGCATACTATTCTGGTTTTCTTGGTTCTACCCTTTATTACTCCGGT
GTCTAGATATCGTTACCGTTATGATCTGCATTTTGAAAATTTTTATATCAATTTAAGAAT
TCATTAAGAGTTTTGTATGCTAACAGCTAGACTGTCTACAAAAATGAATTACAAAGTGCC
GACGTAGTCCAATATACTTACCCTAAATGGTTTCTTAACTCGAAAACCTGATAACGGAAA
ATGATTTTTTTTTTATTCTGCTTTGCTCTGTTAATGCTACTAAACAAGTATAAATTAACC
GACTTGCTCCTTCTCCCATAAATTATGTCAACTTCGGCTCCCCCCTTTATCCCGGTATTA
TTTTCAACTACCTGGATTCTTCCGTTCACAACGTTATATTTTTTGCCCTTCTCCCTATAC
TAACTCTACTTTTTTGAGAAGTGCCAAACTGCAAAGTTTGATTCTAATTTAACGTTTCTT
TAAAGGATTCTCTTCATGCATCTGTATATATAATATTTAACGATAACATTTTAATTCAAG
AATCTGCAGTACGTGTTCGCTGCATTCGTCGCTTTAGTTTCTGCTTAATTTATTGATTAT
TGGGCATCTCCTTTCTTCTTCGTTCCTTCATATATTATATGAATAATAGAAGACCTCGTC
GTTCGCACCACTAAGTAGCAATTCCGACACGTTTTAATTTCCTTTACCGAAACGATCGAC
AATCATTTTTTCCTCTAATTTATTTAAAACTTTTCGGTATTGCATGTATTCCTTCGTCAT
CATTCGCCTTGTTTTTAGATATTTTACGCCCAATTTAAAACCGCTCCTATTTTATTTTTT
ATCTTATTCTTTACCCTTGGTTTCGGTTTAAATTTATCTTGACATCCATCTACGGTCCTC
ATTACAATCATCAAGTTCATTGATGTTGTTTTCTTTAACAAGGATTAAATAATCATATTT
TAAATCACTCATCGGGCAGCTATATCTTTGGTATCATATCATTGTCCGTTGGATTTCTTA
GTTCAAATTATTGACAATCGTTTGCTGTTTCTCAGTTAAGCAAGAACGATTGCCGTATTT
TATTAATTTGTTTAGCTATTGCTAGAGTATTTAGCAGGTTGCATTTCTTCAACGTTGGTC
CCTCATCCAAGTATATAATACATACTTGTTGATTCAACTTTGAAATTTTTTTGTCCTTCT
GCATGCCAACTAGGGGACATTCGCATTATCACTTGATCCATTTTATTTTCTTTTATCGCA
ACTTCCAACTTACTCTGCAGTTGATTATTTTTTCTGTTATAATTTTATCAACTGATTTTA
CTTTTCTGTTTAGTTGTGTGTCGTTTTCGTTTTTCTTTTCTCTTCTTACATTAAAAAAAC
TTGTTTGTCTTTTTACTTTTGTTCCAAGTTGTTTTCAGATTACTATACTTTCTTCGTTAT
TTCGAATTCTGCTTTGACTACTGATTTTTCTCGAACTCTTTAATTTATTTTCAAATTTTT
TGTTAGTTTCTCATTCTTGTCGACTGCTTTGACATAATGGATATTGTAAAGCAGCGTTAT
CATGAACTTTTTGACTTGCGGGTGCGTGGTCCCCGCATGAAGATGGCAGATCGTCTTGAA
CATTTCACTTGGGCCTGGTTTGCATCTGCTATGGGTACAGGCGGTATAGGTATGGTTACT
AGTCTGTACCATTTTCGGTTTTACGGTCTTAATACTTTAGGAAAAATCATTTTTATTTTC
CAATTATCTATCCTAACGTTATACATTTGCTGCATCACGTTTCGTTTCATCCGCTACCCG
GGTACTCTTAGTAAAACATGGAAAAATCCTTCAGAGGTATTATTCATGCCTACTGCTTTA
CTGGCAATTGCTACCTCTATCAGTAATTTATATCCATACGCCTTTCCTTACACTGGTGAA
TGGATGGTATGGTTAATTCGAATTTTATATTGGATATTCGTTGCAGTTGCTTGCATCTTT
GTGATTTCACTTTTTTATTCTCTTTTTCATGCACACCCTTTCCGCATCAATACTATCATA
CCTGCCCTGGTTTTACCCATCTTTCCTTGTATGATTTGTGGTGTTATTGCTAGTGCTATT
GTTGAGTCGCAACCGGCTAGACAAGCTAAAAATATGGTAGTGGCAGGTATTGCATTTCAA
GGCCTTGGTTTTTGGATTTATATCATTGTTTATGCTGTGAACATGTGCAGATTTTTTACC
GTTGGCCTACAGCCCGCTGCTGATCGACCTGGTATGTTCATTCTCGTCAGCCCTCCTTCT
TTTACTGGCCTTACTTTGCTTGATCTCGCTTTTGGTGCAAAAGCAAAACGTCCCTATATT
TTTGTTGGAGATAATTCTTCTGAATACTTAGAGTTTGTTGCAACTTTTATGGCTTTATTC
ATGATAGGACTGGGTATTTTCAACTTCTGTCTTGCATTTGTGTCCGTTGTTGCTGGATTC
TGTACACGACAACGAATTAAATTTAAAGTCAGTTGGTTTGCCATGATTTTTGCCAATGTG
GGACTGGTTATGGATGTTCAAGAATTGGGGAGAGCCATAGATTCAAAGGCTGTTTGTATT
GTCGGCCAGGTTTGTGGTGTCACCATCACTATCGTGTGGATTATCCTAATCTTATTAACT
TTGCGTGCTGTCTATGTACAGGAACTGCTGTATCCCGGAAAAGATGAAGACATAGATACG
ATATTGCCTAATGTACTTGAATATTACCGACATCTGGAAGAAGAAGAGAAAGATGAAGCC
GAAAGGTCAAAAAGGAAGGCGGAAGAGAGTGATGGGAAAACCACTCGAGAGTTGACTTCT
GGAGGTCTTTAAACCGCCAACGAATACTTCAGTGTATCTACTTTTTCAATGTATTCCATC
ACTGAAACATATCGTGTGATGGAGTCGAATCTTTGAAGTTGACCATGATGGATCAATATG
ATGGTTCTATAAAATTTTTCTGTCTTTTTAAATTTATGGTTACTTTCGACTAGAAAGTGA
GAAGTGAAAATTAAAAATCTTAGTTATTTTCACTGTGTAATGTATGTCGAATATAGAATG
TCTGACCTTTTATTCCCGGCTGATGCATGTGTGTGCGAGAAACTTATCGTGAAGCTTACA
AATAGAGAAAAGCATGAATTTGATCTAACCTGTTCAACAAACTTGAAACTTTGTCTTTTG
GTCATTTAAAATTACAGCTGAAAAGCAACTTTGTAAAATGCGAACCAACAATGATTACGC
TGTTTCCCATATGGCGAAATAGAAAGAATGAACAGTTCCTCTGTTTATTTTATCTAATTT
ATTCTAACTCATTCTAATCTTCTTGTTTTCTTCCCTAATACAACGTTGAGAGTATTTTGG
ACAATAAAGTTTCCTTCAGCTTAATGACCTCACTCAAAACTTAGATACAATTCACTTTGG
ATTTGCCAAAGAATGTATAGATTAATAGACTCATGCACATCGTTGGCATGTACATAGATA
AATGAGAATTTTCGTAATGTTTTAAAACATGCTGTATATAAATTATTTTAATTTACAAAT
ATTTTTATAATCAGATGACTTAGCGAAATAAGAATCAAAATGCACACATTTATCTAGTTC
ATAGAGAAATTGAAAATTGGAAACTTTATGCTTCCTGCTAGTAACTTAAAACTATTCTTT
GAATTTGAATAATTTATCAAATGCATCAAATAATTAAAACATAGATCACATGAAGTGCGG
TTTTTTTTTAATCTATGTTACATCTCTCTTTTATGCCGACATTATGGGCCACCGAACTCC
CCCCATATAGACTGGGAGTATGTGGGCAGTATCGATAGTACGTTGTCTCACTTCTGCCAA
CACCACACTGCCTTTTTGTCATCAAAAAGTTTTTATTGAAAAAATCTTTTACTAGATTGA
AAGGGACATCATGCTATCAGCAAATATGCTTCGTCGTATGCACCATGGTGTTGCTGTAAC
TAGAATGCTGCTTGTTTCGAATGGGTAAGTAAGATAGATCAGTATATTGATGCTTCTGGT
TCATCGATTAATCGTAATGAATTTTAAACGAAAATCTAATCAGTGTGCAGAAAAGTTCAG
GTTAAAAAGTCTGCTCTTTATCCTGTTATGGCTAAGCTAGCTCGCACATACGCTACCAAA
AGTAAGTGATTGCTTTTTTGGCTGAGAAATGGCTTTCTAACAGTTACCATAGACTATCCT
GCTCATACCGTGATTAACATGCCCGCTTTGTCTCCGACTATGACTACTGGCAATATTGGA
GCATTCCAAAAGAAAATTGGAGACAAAATTGAACCTGGCGATGTTTTGTGTGAGATTGAA
ACGGATAAGGCCCAGATTGACTTTGAACAACAGGACGAGGGCTACCTTGCAAAAATTTTG
ATTGAAACTGGCACTAAGGATGTTCCTGTTGGCAAGCCCTTAGCTGTTACAGTCGAAAAT
GAAGGAGACGTTGCCGCTATGGCTGATTTCACCATTGAGGATTCGTCTGCCAAGGAACCC
TCAGCTAAGAGCGGTGAAGAAAAGTCGGCTCCTTCTAGCGAGAAACAATCAAAAGAGACC
TCTAGCCCATCTAATGTTTCTGGCGAAGAACGCGGTGATCGCGTTTTTGCTTCACCTCTG
GCTCGCAAGTTGGCCGAAGAGAAGGATCTTGACTTATCCCAAATTCGCGGCTCAGGTCCC
AATGGACGTATTATTAAGGTCGATATTGAAAACTTTAAACCTGTGGTCGCACCTAAACCT
TCAAATGAGGCTGCTGCTAAAGCTACAACTCCTGCTGCCTCCGCTGCCGACGCAGCAGCA
CCTGGTGACTATGAAGATCTTCCTTTAAGCAACATGCGTAAGATCATTGCTTCTCGTCTT
GCAGAAAGTAAAAACATGAACCCTCATTACTACGTTACGGTCTCGGTTAACATGGAAAAA
ATCATTCGCCTCCGTGCTGCCCTCAACGCCATGGCTGATGGACGCTATAAGCTTTCGGTT
AACGACCTTGTTATCAAAGCTACTACTGCTGCTTTGAGGCAAGTTCCCGAAGTTAATGCG
GCTTGGATGGGTGACTTTATTCGTCAATATAAGAACGTCGATATTTCTATGGCTGTTGCT
ACACCTTCTGGTTTAATCACTCCTGTAATTCGCAATACTCATGCACTCGGTCTTGCAGAA
ATTTCCACTTTAGCTAAGGATTATGGCCAACGTGCCCGTAACAACAAATTGAAGCCTGAG
GAATATCAAGGAGGCACATTCACCATCTCTAATTTGGGTATGTTCCCTGTTGATCAATTC
ACTGCTATCATCAATCCTCCTCAAGCCTGTATCCTTGCTGTGGGAACCACTGTTGATACA
GTTGTTCCTGATTCAACCTCTGAAAAGGGCTTTAAGGTTGCCCCCATAATGAAATGCACT
CTTAGTTCCGATCATCGTGTTGTTGATGGTGCTATGGCTGCTCGATTTACCACCGCCCTA
AAAAAGATCTTGGAAAATCCATTGGAGATTATGCTTTAAAATAAAGCAAAAGTCGGGTTG
CTCATACTATCATGCAATTATTTTGTCAATAAAGGTGTTTACTCAGGTTATGTTTTCGGA
GCTTTAACAGGAGCTTACGATCAATCGTTGTAGGTAGATTGAGCATTCTTTGTTTCTTGT
ATACATTTACTACTACAATTGGCTGTTTGAAAAAACGATTTTATTTACTAAGTGACTTTG
TTCCGTTTCTGTCTTATAATACTTTGCTTGCTTTGCAAGCTTATAATTTTCCTTCCTATG
TTTATTAAATATTACTTTTGTTTAGAATTAATAATACTTAAGTAATCTTGTTGATATCGT
TAGTATTGACGGCAGGAAGCGCAATAATAGCTACGTTAAGTGCTGTTGGGTATGTAAATT
ATTGTTGTTTTATTCAATATATTTCAATAGATTGTTGCTTAGTAAGTGATAACCGACATC
CCTTGTTTTAAACCAGTTCAAATGTTCGTTTGCAAATGGATATCTTTAATAATGTCTATT
GGCATCAAAATCTGGCTTCTTAATTCATAAAAGAGATTTAAAGATATAGGGAATGTTTAA
GTTTTAGAGAATATGAGCATGTTCGGTAAGAAAAACTTTCAGGAAAGGTAAGCAGGAATA
AGGATATAAGGCATGTTCTATAACCTTTGATAAAGTCATTTAAATATTCGAAAGTTGTTT
TCGCAGTAAACGCTTTATTTATGGCTCATGAGTCATTTCTCAATAACAAGATCATTTACA
TATGTCTGTAAACTCATTAATCTTCAGATCAGTTATTTTTGGTGGCGTGTTCCACTTAAG
ATAGCAGTTTGCACTAAATAATTAACTGAATTATACGGATCACTTTTCTATTTTTTGTGT
TTAGAGGATACCGGTAGACACATTTACTCAAAATAAGCTTACACAAGCGACTCGTTTAAA
GTTACCTTAATACGTCATTTTTAATACGTGAAGCTATATATTGATTTTGATCATCGTACT
ACTCAGAAGTATCCGTTAACCAACTAAAATTGCTGTCCATGTGATAGCCAGTTTTTTAGG
TCCTATGTGGTTACTATTTCGTTCTAAGCATAAGAAGTTAGTCCTTCGATGTTTTCCTTC
GGGGAAACTAGGAGAAACGGAACCGAATGGGTCACCTCTAGCATACCTAAGTTATTATGC
TGCATCCAATTCGAGTAAACTGAGAAAAGTGGCTCATTTTTTAGGGAGTCGTGTTCGTCA
TAGCTATTATCATAAACGTGATAAGTAAGTTCCTGTTTTAGGCTCTATTTCTAAATGTTT
TTAGTGAGGTTATTATCGGATTGAAAATATGCAAAACATTGGTTCAAAAATGTCGGGATA
ACATCAACGTGATGGCCTCCGAAGTTGTAAATATGCTCCTTGTTGCTAGTTCGTCAAAAA
ATTTAGAAGTTTTGTCTGCCTGCGTTGATTGTTTTGCTACGTTTTGCGATAATAGTGGAA
AGGGGAGTCCTGCCACTTTTGGCAACGAATTCCATTCTGCTTTTAATAACTTAGTCAATT
CATTTTTTGAATTATCAAAAGGTATTGATTGTGTTGATCCTCAGCAGTCGAAAATGCTTG
GCCTGAAAGCATTCCATGCTTTAACCGCATGCAAGTTTGCTGGAACTGAAGGCGGAATGC
GTTATCAACCTCATTTTGCTATACATTGCGTTTTGATTAATTCTTGGAGTGAATCAGATC
AGGAGAAGAAGTCATTTATTGATTTGGTTCGTTCCACGGCTAAATCATATAAGCCATTGC
CTCCTAGTAGTACTGGTGTTTCATTACCCGAGCATGATGAAGCGGGTGATAATATAGATG
TTGCCATTAAGAAGTTATGTATTAGAATTTTGTTCAACATATATACTCAGACAGATCCTC
TGTTTATGGCCGAAAGTACGAAGTCCTTGATACATTTTTTTGCAGCAAAATCCGACACTC
CGGTAAATCTAGAATACATATCTGTCGTGCTTAACCAAATTTTGGATTGGACTCCTGTTG
AACTTCGACATTCGATCTTTTTCTGTTGTCTTCGTTGTTTATCAAGTTCTCGTATTGTCA
ACTCTGAAACTAATGTGATGGTGCCATACATGATTTACTCCATTCTTAACTCGAAAAACT
CAATTTCTGGCTTATCCGTTATTGACGTGTTACGTGATTTGGGGTCGCATCTTATCAACG
CTGTCAATTCATTCGATGCTGATGACCAAACTTGGTATAATATGTGTGAATCTCCATCGG
AAAAGCTCCCTAGGCGCCTTTATTTACTTTTGGTTTGTATCACCTGTTTAACTAAGCATC
AATATTACGATGAAGAATTTGCTGATGTATGGCGAGAAATCGACACTCTTGCTAATTCTG
AAACTTCTTCTGCTATACAAATGGTAGCTTTAACAGCTTTTCATAAGCTGCAAAATGAAA
AGCTAAATACAAAAAAAGAATCCAGTGCTCCTCTCTCTTTAGTTACCGACTTTTTGTTGC
ATAGCTGGCCCAAATCCGCTGAACGTCTTCACACTTCCCAGTCACCTTTTGTACGAATAA
AAACTGCTGAGGTGTTCTACGAATTTTTGTGCTTTCTCCGTCCATCTTTAATAAATTTCG
ATACTATTTTACGGAAAAGTGCAATCACATCATTTTCTGTATTATGGGATTTTATATATG
AAACCAGTTGGCATATTGAACGTTGGCTCAAGGTGTTTTCGGTGCAGTCTGAATTTTATA
TTCTAAAACTCATCATCCAAAGGCTTTACCAGCTTTATGGTCCAGTTTCTGTAACAGCGG
TATTACCTGCTATGTATCGCGGACTACGACCCTTTGAAAATGATCCTCCTCGCTGTATTG
CCGAGGCGGTTACTGCTTATTATATCATCTATATTGGAGAGAATTTGAAGATCACAACTC
TTCAGTCAAGTGGACGAAAGTGGCTTGATTCATTATCTAGCTCATTACCTTCGAGTCTCT
TGAACAGAGGTTCTTCTACGCATTCTTGGGAGAAACTAACAAATGCCTCTACCGAGGAAG
TCATGTTGCCTTTGGACATGGTTGTAAATGAATTATTGGAGAAAAGCCCGAAAGTATTCC
CAGAGGACTCTAGACTACTATTTGCTGAGCAATCGCGACACCCCAAGTACACCGATATTA
TTCAAAAATTAAAGAAACCGTCTCGCGAAAAGTCTTTTACTTCTTCTTCAGAATATTCAC
TTCCATTTATATCACCGGCTTCGGATTACCAACAAAATCCTTTACTTCATGCTACCAAGT
CGCTCGTTTCTATTCACCAGCAATCACAACGTGGAGAAATGGTTAGCACATTGAAACAGG
CTCTATCAAGGCCACACACTGCTAGTACTGTCGTACGTTCTCCGTCGGAAATAAATCTTA
CAAGACAAACGAGCAACCGTGTACCTCTGCTTGATATGTTGAATCTTAATCGTGCTATGT
CTCCGACACCTATTCAAAGTCCTCCATATGTACGCACTTAGTTCTACATATACATATTTT
GCACTTAAAAAATGAAAAAAAGAATTATCGTTGCAAATCTATATTTAACCATGCAATTTA
AATTTCAATTCCTAAGTTATAAGTAAATTTAATTACTGAGTAGTATACCAAATTATATTA
ATCAACAATATAACATTCACTAGCCTATCCTGATTACAACAACTCAAGATCTACTTAAAT
CCGAAGTAAAAAATGTTTACTTCTTGGCGCCAGCCTTAACAGCGGCCTTAGTGACCTTAG
CGGCACCAGGGGCAACCTTCTCAACGGCCTTGATGACACCGACAGCGACGGTTTGACGCA
TGTCACGGACAGCGAAACGACCAAGAGGAGCGTAGTCAGTGAAAGCTTCAACACACATAG
GCTTGGAAGGAACCATCTTAGCAATGCAAGCATCACCAGACTTGACAAACTTGGGGGACT
CCTCAATCTTCTTACCGGAACGACGGTCAATCTTCTCAATGAGCTCAGCGAACTTGCAAG
CAATGTGAGCAGTGTGGCAATCCAAAACAGGAGAGTAACCAGCAGAGATTTGACCGGGGT
GGTTAAGAATGATGACTTGAGCGGTGAAGCTAGCACAACCCATGGGAGGATCGTTCTTGG
AGTCACCACAGACGTTACCACGGCGAATATCCTTGACGGAAACGTTCTTAACGTTGAAAC
CAACGTTGTCACCGGGAAGACCAGCGTCGAGAGACTCGTGGTGCATCTCAACAGACTTGA
CTTCGGTAGTGACACCAGCGGGAGCGAAGGTGACAATCATACCGGGCTTGATAACACCAG
TCTCAACACGACCGACGGGAACTGTACCAATACCACCGATCTTGTAAACATCTTGAAGGG
GGAGACGAAGAGGCTTGTCAGTGGGACGTGCAGGGGGCTCAATGGAGTCAATAGCCTCCA
AAAGAGTCTTACCCTTGACGACACCAGCCTTGGTCTCCTTTTGCCAGCCTTGGTACCAGG
GCATGTTGGTGGTGGGCTCAATCATGTTATCACCTTGGAAACCGGAGACAGGGACGAAAG
GAACGGTCTTGGGGTTGAAACCGACCTTCTTGATGAAGTTGGAGGTCTCCTTAACGATTT
CCTCGAAACGAGCTTGGGACCAGCCAGTGGTGTCCATCTTGTTGACGGCAACAATAAGTT
GCTTGACACCCAAGGTGTAAGCAAGCAAAGCGTGCTCACGGGTTTGACCATCCTTGGAGA
TACCAGCCTCGAACTCACCAGTACCACCACCAATAATAAGGACAGCACAGTCAGCTTGAG
AAGTACCGGTAATCATGTTCTTGATGAAATCACGGTGACCGGGGGCATCAATGACAGTAA
CATTGTACTTGGGAGTCTCGAACTTCCAAAGGGCAATGTCGATAGTGATACCACGTTCAC
GCTCGGCCTTGAGCTTGTCCAAAACCCAGGCGTACTTGAAGGAACCCTTACCCAACTCGG
TGGCTTCCTTCTCGAATTTTTCAATGGTACGCTTGTCAATACCACCGCACTTGTAAATCA
GGTGACCAGTGGTGGTAGACTTACCAGAATCGACGTGACCGATAACAACGACGTTAATAT
GTCCCTTTTCCTTGCCCATTTTTTACAATTAAATTTTTTGGCGTGTGGTGAATGACAAAG
GCGAAGCATCCTTCTAGTACTACTAAGTGATTTGTGACTGCTCTCCACAAGAAAATATGT
GACTACTTTTAGATGAAATCTGGTTACCGAGCTGCAGAAGACTACGGCAAATAGCTGTTA
AAGTAGTTTATTGGTATGAATCTTATAGTTTATGTGGAAAAGGTGAGAAAAGCCTATGTA
TATTTAAAAGGACGTAAAGTCATATGTAAATAATTATTGAAGACTCTAAGGAGTTTATTC
CATCATAAGCAAAGCGAGTTATAAAAAACTAAATACTATCCTATAACAACTGCATAGCAG
TGTGACAAAATGTGATTAGCAATCGTTAAGCTAATATAAGAAAGTCTGCATTTTAATAAT
GAACTACGTCGGCCTGTGTTAAATAAATATAGCGCAATAGAACGTAGATTCATTTTTATT
AACTATAAACAATAGACCTAAAAGAATGTTGAACAATAGGTAATTACAAGTGAAACACAT
AGAAAGGGCTTACTCGAAACAATTAATGAAGTAATAAATGACCACAATAATTCAAATCCT
CTGTTAGTGTTTTTTAGAAATAGCTGATTTTCTTTATAACTCTATGTGATAGACATTTCA
CTATACTTGAATTGATTACCTAGCTAGTCATTGAACTAGCTATACTGAAATTTAGGCGAA
CAAACAGCTTTTTATCAAATTTTCAATTGCGAACGTTTTAATCTGATAATAAAAATGCAT
GTCAAAAAGTTGTGCAGTATGAGGAATTTTTTTGACTCTGATGGTTGTCGATAATTCCAG
CAGAATCATTTAAGCAAAGTCTACTTCTTATAACAATAGAAGTATTGATATGCAAACATA
GCATTGTAATCATAAGCTCTATATCTTCTAGTAACTTAAACGTTGCGAGTAATTTCTTAA
GTACCATAGTTTGGACTTGTTTATTTCAGCCCAAGCAAACGATTTTCTGTTTATCTGCTT
TGTTTTGAATTTAAGTTGAATAAGTTGCATCTTTACCAATCTACTTAATAAAACAAAAGA
CGTAAAACATAGATATAAAGTGTCTCAGTTTGTTATTTAAGGTATATTGCCCTTATTTCG
AAACCATACAGAATGATTTGTCACTGTATGCAAATTAATACAGAGAAGTTTTATTAAATT
CACTTATAGAATAAAAAACAAATTGTATCTAATAGTTTTGAGTCTTTTTGTCGAGAACTG
ACTGTAATAAGACTTAGTGATAGATATACACAATAAAAGAAACTTGGACATTTTTGACAC
AAAATAACTTGTCGTAATTATCTTTCTAATCCATAGCAGAAAAGAATCCGCCAGTATCTG
AACAAGGAGGATATCAAGTGAAAAAGATCACGTTGGAACATCGGAGTGTATATCGTTAAA
ACTAGTGGTTCATTTCATCCTACCACTCTCACCCCAAAAAGTGGGAGAATCGACAAAACT
CCAAAATGTTGCATCGTCGAATTCATTTTAAATCACAGTCCACTTTGGACTTTGACAGTG
TTGCAGTTAGCATATCTGCCAGTACGATGAAAAACGAATTAGATAAACTTGTACTGAATT
CCAGAGTTTCGGATAAAAAAACGTTTGGCATACAAATGGACAACTTCTTTGCTTTGTATA
GAAGATATTTATTACACACAGTTAAAGGTTATGAATGTGATTGGGATTCTATCCGGCCTC
TGGGACCCGAAGACATGATAGATTACGGTGATTTACCGTTATGCAAAAATGCTGGAAAGT
ACTTAAATCGGCTTGCAGTTGTTAAATTAAATGGAGGTATGGGAAATGCGTTGGGTGTGA
ATTATCCTAAAGCCATGATTGAGGTTCGTGACAATCAAAGTTTCCTCGACCTTAGCATTC
GCCAAATCGAATATCTTAACAGACGGTACGATGTGTCCGTGCCTTTCATTTTAATGAACT
CTTACGATACAAATGATGAAACCTGTAAAGTTCTTCGAAAATATGCAGGCTGCAAGATTG
ATATTTCTACTTTCGAACAATCTCGATATCCCCGTGTATTTGTTGACTCTCAACTTCCTG
TTCCAAAAGCTGCTCCCTCTCCTATTGAGGAGTGGTACCCACCAGGTCATGGTGATATTT
TTGATGCGTTAGTCCACTCCGGTACAATTGAGCGATTGCTCGCTCAGGGTAAAGATTACT
TATTTGTCAGCAACATCGACAATCTCGGGGCTTCGGTGGATCTTAATATTCTGTCTCATG
TCATAGACAATCAAATCGAGTACTCGATGGAAATTACTGATAAAACAAAAGCTGATATTA
AAGTTGGCATCCTTGTCAACCAGGACGGCTTACTAAGACTTTTAGAAACCAACCAAGTTC
CCGAACAACATCGAGAAGAATTTATGTCTGATAAAGTTTTCAAATACATTAATACGAATA
ATGTGTGGCTTTACCTTCCGGCAGTCAAACGCGTAGTTGAAAACCGAGAACTCAACTTAG
ATATTATGCCAAACATCGAAACCGTCTACTATAACAATGAGCCTGCACGAATTATAGAAT
TTACGACAGCAATTGGTTCCGCTATCAGCCAATTTAAAAAAACCGAGGGAATTCGAGTTT
CAAGACCACGCTTTATTTCTGTCAAGAATTCCTCCGATTTATTCTTGGTACGATGTGATT
TATACAACGTTGATCATGGTTCCTTAAAAATTGAAGAATCAAGGCTCGGTTTTCCCCCTC
CAGTCGTTCGCATGTCTAATGAATTTAAAGATATCGCAGAACTTTTTTGCCGTATTCCTT
ACATGCCTAGCATGAAAGACCTAGTTTCTCTATCCATTTCTGGAAATGTATATTTCGGAA
GAAACGTGATATTAAAAGGAAACATCGTGATTGTTGCTTCGGAAAATACCATCCTTTGCA
TCCCTTCCAATGCAGTTTTAGAAAATTGTGTTGTGACAGGAAATTGTAAAATAATGGAGT
GTTGAGCTTCACAAAAAAACCGAAATCTTTCTTTTCTCTTTTTTCTTCATAATTTCTACA
TAATGAATTTTCATATGCGCATCACGATGTTTATTTTAACTCATACCCATTTTGGGACAT
AACTTTATGACCATAATCGAACTCGTCGCTTACACTACTCTTTCAGTACCATTTTCTTCT
GAGGACATCTAGCGATTCGAAATTACTTTACTCTCTTTAATAAACAATTATAGTTTCAAT
TTTATTTCTCATGTTAAGGATTTGTAAGATTATTTTACTGAACTAAGGCGAATGAGTAAA
GGACTCGAGGCTCGACGCTGTTTAGATAAGAAATACCTCTAATATATCAAACTAAATAAA
TTAATCAATCTCCATCCTTATAAGGCCACCAATTGCATTCCCATTATAGGAAAATGCAAA
ATTGCAATGAAGGTCATTCTACCGACGTGAATAACATTTCCAAAATTCATTCTAGCTTCA
CCAACTGTAAACAAAATCGTAAAGCAGACGATGTATAGAGAAATATAAGGACAATAAACA
AAGGTATTAAAAAATGAAGCAAAAGAAGGTATTAAGACCTTGTTGCTAACGATCAAGGGC
TGGAGATAGTTTAAATGAGATAGGAAACGACTACTTAAATTCCATAGCAAACACATGCTA
ATAGGAAGTATTAAAAAAGACAAACTAGGAATATAAAAAACAATTATTACAATAGGAGAT
TGTCGTTGTCTAGGAAGTTTTGGGTTTTAGAAACCGGTTCGCTAGAAGACGAAACAACTC
TTTCCCTAGTTGAGTTTTCTTGATGAACTTTGTTTACGGCAGAGGACCACAGACTACCAA
AAGCATCACCATTAGATCCAGAAGATTTGGCAGCAGTAGGTTGTTGTGAGGTTAATCCGA
GACCGGCTTGTGAAGAGGTATTAGACAATCCGGATGACATACCAAACGCAGATGTATAAC
CCGTATTAAAGGTAGTAGGTTGAGGTGTAAAGGCACTGGATGATGTGGGAAGTTGATTTA
AACTATTAAAGCCACCGAACGAAATTGACGAAAAGGCAGCAGTATTTGAAGCGGGTTTGG
CGGAGGGAGCGCTTTGAAAATCATCAAAAGCATCATCGTCATTTTTAGCAGCAGTTGAAG
CAGTTTGAGAGCCCATAAAGAGAGAGGCATTGTTTAAGGTGGAAGAAGCTGGGGCAGCGG
CAGAACTTTGGAAGTCACCGAAGCCATCATCTTCGAACGCCAAAGGAGCAGAAGTATTTG
TTTGTGGTTGGGCAGGAGAAGGCTCATTGTCAAGACCCAATAAATCGATCATTGCAGATT
CCTGTTTTGGCTGCTCGGGAGCTTTGTCAGATTGTTTGGTAGTAGTGCGACGTGAGCCAC
GCGTGGAGTTTGCGGTTGCAGCATCGCTGGAACCACCATCTCCATCTTCATTGTACTCCT
CTACATCGTTATCGGATGCATCACGGGAATCACTCATAGAAGATGAATCATGGTATCCAT
TACCATAATCGGTAAAGCCGCCACCGTCTCCGTAAACGCGAGTTCTATAAGAACCACGGG
AAGAGCCAAAGCTAGGAAACCTAGATTTAGAGCTAGTGGAAATCCTAGAATCTCCATCAC
TACCAACACCTATAAATTTACCACGATTTTGACGCGCTCTCTTGCGTTCCTTACGGATAC
GTTCGCTATCGTTTAGTAATTCCACCAGCTCTTTAGCTCGAGTTCGAACATTAAGCCCTT
GGTCCTTTTGACGATGGTCGATGTAGTGAAAATTACGAAGCATTTTAATAGTTGCTTGAT
GTGCTCGAGCATCATCTACCACTCTTTCAGACCCGTTCTTGACCAAAAACTCCAGAAGCT
GAAGTGCTTTGTAAATTTGACGCCATTCTTCTGCAGTTTTTTCGGTAAACCGACGGTAGA
TCATTGGTAAAATTTCGTTTAACTGAGAGTAGTTGTGAGTTCCTTGGGCAATTTCCATCA
TCAAAGAAGTACTAGCGCCCCAGGGTTCATTATTCGTTGCTTCACGAACTCTGGCTTCCA
TAGATGTATAATTCATTACAACATTTTGTGCTTTACGAACCGCCGCCTTGATATCGTAAA
GGTTGATGTTCTTCATCGTCGATTGAATGGACTCCATCTTAGATAATGTTTTACTTTCTT
GGATTTCTAGTTCCTAAAGGAATTTATATCCAATTGTTTAAATGAAACTTTTTTAAAGAA
GTTTTCGCTTCTCAAAGAACGCGTAGGCAACGAGTATGGAAGTATTGTTGTCGGTGGATG
GGGAAATCAGATTTCTCAGTCTAGCCGCGGCTCCTTTTTACTTTATCAAGAAACTGCATC
ATATATCTTTATTCTGCTTTACTGAGAGAATTTTTTTTTATTGATCTACGAAATTTAGTA
ATAACGATTTTAAGGGTGTTCACTAAATCCCTTGGGAATACAAAGTTCTATTTACAGGCC
CTCCTTGTATGTATATATTCACACACATTTTGTAGGTGTCAAATGCGATTTACTATTTGT
TTGTTTCATCCATATACAGATTTCTCTTTCCCTTTTTAATTTATTATTCAGATTAATCTG
ATTATAAAGTTAACTTGGTGTTTCTATATAACTACCCATTATAAATTCGTAAAATTATAA
CCTTTATTAAATCAAATGGTTCATTCAATACATAACGGTTTACGGTTTGAATACTCGTGC
TCAATTTATTTCAGACTGAATCATATACCATTTATTTCGATTTACTTTTCAGAGTAAAGA
AATTCTACCTCTGCTATACTCCAATCTTTTTAATGTATATAGTTGATGAATAACAATAGG
AGAAAAAAGCAATAATAATTGATTATCTTTCTACGCATTAATCATTCTTAATGGAAGATG
CCTAAATATGTACATAATGTTTCTAATATTCAAATATGAGCATTTGAATAAAACGGGAAT
TTTCTTTTTAGCAACTTATTGTAAATTCATCTTTCAAAAAATTATTTACATGAATATCTT
TAAATACAAGCAGACCAAAAAGCAGGTTTCAAAAAAAAATAAAATAAAAGGCTTTATACA
AAAGGCTTGTATTCGGGATTCCATTCACGTTCAATAATCCATTCCTTCAATTTAGCATCA
TCTTTGGGTAAATCCACAGTGCTCATTCCCTCAGAAACAGCTTGCTTCAAGACTGCAAAA
ACAATGTGACGAGAAATTTCGCGAGCATTGTTCAAATCTGGCAAGAGGGCTTCATCAGCA
GCAAATAAAGATCTGGGAACAGTGGCCAAAGCATCGGAAGCTGCTTTCAGCATACCATCA
CTCAATAACTTGCAACGGGATAACACACATGCAACACCAAGAGCAGGGTAAAGGAGGGCA
TTGTTGCATTGGGAAATCACGTATTTTTTACCATTGCGATTGAGAGGAGGAAGTGGGGAA
CCAGTGGCTATCAAAGCCTTTCCATCTGACCATTTGTCAATTTGATCGGGCTTCGCTTCC
ATAAGAGTAGTGGGATTAGAGATTGGGAAAATGATGGGGCGCTCGACGTGCTTGCTCATT
TCACGAATGGCTTTCTCTGTAAATTTACCCGGTTGACCGGAACATCCCAAAAGAATGGTG
GGCTTGACGAGTGCAATAGCACTCTCTAAATTAATGTCTCCAGAAGGGACTTCCTTAAAG
TCAGAGTCCTTCTTCAAAAATGGCTTTTGTCCATCAGTAGCAATCTTAGCATGTCTCTCC
AAAAGCAAACCGCAACGATCAATCATGAAAAGATTACCTCTAGCCTTATCTAATGAAAGG
CCATCTGTCACCATACCGGCAACAATTTGGTTGGCGATACCAACACCAGCAGTACCTGCA
CCAAAGATCATGATGCGCTGCTCGGTTAAGGGAGATTTCGTAACGTGAAGGGCGCCAATA
ATGGCGGCCAATGCTACGGCACCGGTTCCCTGGATATCATCGTTAAAGCAGGCAATGTCA
GGACGATAGTGGTCTAAAATGCGCTTGGCGTTGGCAAGACCAAAATCCTCAAAATGAATA
AAGGCCTCAGGAAAGACTTCACGAATGGCCTTTATAACATTGTCCAAAAAGCTGTCATAC
TGTTCACCACGAACACGATCCTTTCTCAAACCCATGTATTGATGATTTTTACGATGGGTT
TCATTGTTGGTGCCAACATCGAGAACAATGGGCAAGAATCGATTAGGGTCTAAACCCGCG
CATAAAGTCATTAAATGTCCCTTGGCAACTGAAATTAAGACACCACCAACACCTTGATCG
CCGATACCCAAAATACCTTCAGAATCGGTAATGATAATGTATTCGACACTATCGGATTTT
CCAAACTCGGAAAGCTGTTGCTTGATATAAGACAAATCGTTATGATCAATATCCAAATAA
CAACCCTCAGGATAACGATATATATCGGAAAACTGCTTGATGGCATCGCCTTCGGTAGGT
GTATAGATGATAGGAATCATTTCGATCAAATGTTGGCTGATGAGTGCGTAAAACAGAGTT
TGGTTGGTGACGCTTAATTGAGAAAGATACAAATTCTTCTGTAAGGGCTCATCACCGATT
GCTTTGTACTGGTCATAACAGCGATCCACTTGTTGTTGCAAAGTTTCAACAATGGGGGGA
AGACGTGATGAAATCTCAAATTTTTGACGCTCCTCAGGTGTAAAAGCAGTGTCCTTATTG
TAGCGAGGAGAGTTTAACAAAGTTACTCCTTTTAAAGGACACTCGATTTGTTCTTTGGTT
CCTGCAGGCATTTTCAAACTTCAAGTATGTGTAGATCAAAAATCCAAAATATCAGAATTA
CTGTCCTTTTCAAATGGGTATAGCCCTACTTTTAAATAACTATTTTTTCGTCAGTTGTTC
CGGTAAGACGGTCCACGTGCTGATAGTATAGTGCAATAAATTGTGCGTGTCAACCACCAA
ACGTCACGATTAGCCCAGTCGACCTCGCAATTTTTACGTTCGGTTATAGCAGTAGTTGTC
ACTTTAAATGAATGATCCCCCTTCTCGCCACCGATTTTCCTATACATTAGGGACTCGAGT
CCAATCAACTAATAACGTAAAAGGATTTTCTTACATTTTGAAACAGATAACTTCGGGTGT
TGCCAGGGGACATGGACAGCCGAGAACAATCTTTACAACAATGCCAATGCAAAATCGATT
GTCAAGTTTCGAAGAGATTACACATTAACAAGAGGATTTTATTTAACATACTAATACACC
TTGCATGCTAACTCGGATGAACAGCCGATTCTTTCATCTTTTGTTGGGCTTGGTAAAATG
AGAAGTCTAATAGTCCCCCCTTCAAGAAGGTTGATTAAGGATGTTGATATATATATAGTA
ATAAGAAATAGCTGCACTATGTCATTTTGTTTATGAAAAACAGGTTTTCGTTAATGCACT
TGATTAGTAAAATGCATTTACCCAAATAGAAAACATAAGTTGTTTGCTAGCGATTAAATT
ACTAATCTAACAAGTTGAGAATCACTCTTTTCCTGGTGAGCTAGTGTATTTTTTTTTTGG
TTAGGGCAAAATGCTTATTGAGGGTTGCTTGTTCAAGTAAATAAATACCTTCATAGAACA
ATATATAGCTTTAGCTTTGTGTTAACTTGGATAATTGTTTATTAATGCAGTTCTAAACAA
TAAGTTGATGCTTTTTGAATAAGAGGAATTTACTACGCGAAATTTAGTTTGCGACTGTTT
CTATTCTCATCTGTTAATGAAAACACGCGCAAACACTCTAGTGGTGTTTTCGATGAAGTT
TGGAACAAATCTTTCATATAAGTTAGTGAAATAGACAGGGTAAATAAAATGTCTCAAAAT
GTTTTAATGGCTTCATACTAATGAAACTAAGACTAGTTAAGATAAAGTTGGATTTTATTT
TTATTTTTTTTATTTAAGACAACTAACATGAACGAGGGTTTTGCTTTAGTTACCCATCTG
GATTAAATCAGTATCAACATTAATGATAATCAGGAACCAGATTTATTGAGTTTTAAAAGA
AATCGCTGTATTTCTTCTTTTTGTTGTTTTTTTGGCTCTGAATTAAAAAACCACATAACG
CTGCGTGATCTTTAAAATGCGATGACTTCTTCAATAGACCATCGTTTAATCCCGAATTTA
AAAAATCAAGGTACGATACGAAGACATTAGTTTAAATGTTATTTGTTTTTACTGAACATT
CTATGGATGAATTTCTTTTCCGTATATTGCTTCAGACTTTCTTTTCTTACATTATTTATG
TATCCTGCCACCTCATTTCTTATCGTATATGCTCTCCATCACATTAACTTGGTTTAGCAC
AACTCTATCGTATCGTTATCGAAATTTACCGAGTGTAGAACATGCTGTTCTCAGACACTC
TTATCGATGCGTTGCATTTCTTTACGAGAAACTTCAAAACTACCTTTGACGCGCTTGAAA
GCAGCCACATAGATTGAGGCTTACAATGTCAACATCGCGTTTGCTGTTACCAACAACTAA
CCAACAGCAAAACTCATCACCAGTGATAAAAGAAGTGGACTTGGTAAGCTAGGCATTGCA
TTTGTACTTTGCTAATACCTTGGTAGAATCAGAATACTCCAATACCTGTTGTTTGGCAAA
AAACGAAAAAGCCACCTTTTGTTTCATTTCCTCGACACGAACCTTCTGAAACAATTGTTA
TATCTTCAAAACCTAGGCTTTTCTCATTCGCCAAAAAAATCAAACCAGAAGCTGAACAGC
GAAAACGTAAACGAACAACTGAGATTTGAAGATTTTTTTCAAGGTGATTGCAAAAAACGT
TTGTAGGAATTGTTGGCGGCATTTTTAGTTTTTTTTTATTTTATCGCTCGAATTTTTTTA
ATTTAATGAGCCTTTATTTTTTTTCTTTTTAATTTCGTTAAACGACCTCTTGAACGACAT
TAGTGTTCTTTCAAACAATCTAGTTGAAGCTTGAAAGTATTTGTGATAGACAGATATACA
ATCCAATGCTACGATGTCGGATAGTTTTGATGCAGCCGCCTCTCATTTTCATGCTCGCTC
TTCAGTAAACGATTCTTCCTTTCACCTTTCTCGTCAGGAAGAGGCCGAGCTTTTGGAAGG
TGCCTTGCATGCCCCCTATCCCGAAGAATTACTTTTCGATGATGATGAATACACAGCTAA
GACCCAATATGATGGTCCGCGCTATGCTATGCCTACCATGTTTTACCCGAATAAGCCCAC
TCCTGGATGGCCATTAAATTACGTATTTGGAAATGAGCGTTCTCGCTTCGAGAAAATCCT
TTCCAACTTTGTACTGAGGAATCTCATGTTGCAAGTCCTTGCGCCTTGTTTTGTGTTGCT
TTGGTGTGCTGTCCCGATGCCTCGATACGAAGACTCGCAGGGAACGGTACGTATTCGCTT
TTGGTTTTTTTTAATTTTCTACTATGGTATTTACAATGCTGTTGGCTTACTGTGGATCAC
TAAACTTTTTCATATATACTCTGTAAATTGGTGTCCTAGTAAATTGGGTGGTACAATTAC
TTATATACTTTTCTGGATGTTTAGTTTGCTGGTTGGAAGCTTGGTAGTCTATTTTACAGC
CTGGCGTCAAATTACTTTTACGTGGATCACCCTTATGTTTATTTCCATGATTATTCCCAT
CGGCATTTCATTTTCCAAACTTTGGAAGAAGCATAGTCGGCGCACTGCTCAATTCTTAAC
CCAGTTGGCTTTACTGGAACCTGAGGTTCGAAGCAATGCTGTCTTAGAAACCATTGGATG
GAAAGATGCTTATGCTCATTATTCTTGGTTTATTGTAGTATTGTTGGTAACTTTGCTTGT
TTATATAGTTGGAGAATATCTCACTAATCTTTACATGTCTACACTACCTCATTCATCTAC
TGTTGCCATTATGTACGTTTACTCTTGGACAGGTACTGTAAGCTTGTGCAACCTCGTGTC
TTCTTGGATTTTGAACACCAAAACACACTCTTACGCCCTTGTTACAGTCTTCAAGTTATA
TTTTGAATTGACTCTTCAAGTGTACGTTAGAAATCTCTATGCAAGGTTGGAGTCTCCACA
ACAATTTGTCCTCGTACAAATAGCTTCATCATTAACAATGATGAGTGTGATCCCTTTGAT
AACAATGTCACGTACCGTTTTCCGTCTCAACGTCTTAATGACTAAAAGTATGGATTCGTA
TGTCGTGTACCGAAAAAATATGGGACGAAATTTTTATGTGAAATGTGTTGCCTCGAACGT
GAGTATGCTTTCCTTTTTAGGTTGGTCTTTAATCTTACATTTTGGTTCAAATGCACCTCT
TTATCCTTATTTTTCCTTTAGCAAGGAAGAACCGTATAGCTTCAAGTTGACTTTTTATGC
ATCCACTGCGGTATGGATCAGTGAAATGGTTGCATCTTATTTAACACGTCTTATCATGAG
GAAATTCTATGACTTTGAAGTGGCTTTGGAAGCCATAAGAGATTTTGTCGAATATCCCGA
TATGATACCTACGTTTATCGCCGTAAGCATTCATGTGTTGCAAAATGTGGTGTTTAGTAT
AATAAGTCTTCACTTTTGATGTCCCTTTTCATTTTAAAACATATCTTCCCTTTTTTCGTT
TCCCTTTATCATTTTCTTTCACCTTGTTAATATACATTCATCTGTGGATGACTTATTGAA
TTTCATACATGTACATATCAGTCTTGTATACTTGGTTAAGTCTTTCTTTGTTGCTTTATA
AAGCGCACCTGTTTTCCGCTCTTGTGGTGTTTCAGTTAAACATCTGCTAATGTTTATACA
TTATTTCATGCTGGCATGGATACATATTGGATATTACATTCGGTCCTAAAATACACAATA
CTTTAGATTGTCTAAGGCTTCCCTCCTTTGCAATAGGGAATTCCTATTTACTAAAATTAT
CGTTCGATTATGCTTAATAGGATGCATTTAAAAAAATTTCCGTGCTTTCAACAAGTTGGC
TCATCTTGTTTTTATTCCCGCTTGTTGGTGATTGGCCATTGTGTAAATTAGAAAGTTATT
TAATTACTACTGATCTCGATAGCTTCTTCTTTTTCTGAAATGGCTTAAAGAAAAAGCATT
TATTAAATATATACAATTGTTGTTTTAATCGTGCATTGCTTTTGGAAAGTAATAATTTGA
GAGAGGTCGCTATAAATGCTCCTTGGTAATTGAATGGCGTTGTCAATAGGTGAACAAATC
TATAGCTCATTGTTTTTCACACGTACGTATGTATCTCATTTATCTTCTTGTCTTTCCAAA
ACATACAGAACTATCTTAGGCAGCAACCATATTTAATGCTTTTACCTTATCATCCGTTAT
TTAAAAAATACGCAGTAATTAAATTCGTAATCTCATTTAAGGACCTGAAAGGTAGTTTGT
CCACGATGGGGGCTAATGGTAGAAACCTCACTTGTCCTCTTCCAACCACTTGAAGAGCCT
TGAACAAGAAATTATTTGTACATGTCGCAGTATTACGAGCTTTATAGGCGTAGCAGGTAC
TTTATTAGTTGCTTTAAGATGATAATACTAACTTTAACAGCATAGGGTAATTAAAAACAA
TATTAGGGGATTTCCTCTTTGTGATAATTTTGTATCGTGTCTGACACATTTGTAGAATTT
CGCTTACGGATGCTCTTGATGATTTAATTTCACAGGGAAAAATATCTCCTCAACTAGCGA
TGAAAGTTTTATTTAACGTACGTAAATGAACAAATCCTTATTCGTAGAAGTTACCTACCT
GCTAATCTCACAATTTGATATAGTTTGACAAAAGCATGACTGAGGCATTAGCGGAGAAGG
TCCGCTCTCGTTTAACATTCAAGGGTCATTTGGATACATATCGGTTTTGCGACGAGGTTT
GGACGTTTATCATAAAAAATCCTAGCTTTCGATTTGATAACGAAACTGTTACTAGCAACA
AAATTCGTATAGTCGCATGTGCAACTCGTGATTCTTCAGCCAACCGTTAAATTTGTAACG
TTTATTTTTCCTTTTATTCATTTTTCAGTACATCTTTTTCTTATTATAAAAGTTTTTATA
ATTACACATTGGTTTCGGTCATCGTCTTCATTACTTTGCAAAAGCCTGGAAATTATACAC
AACTTTTCGTATTATTTTTGAATGAGAGGATTGGCCGCATTCCGATGCTTAATTTGGCAT
TAGTGGTTTTGGACTTAATTTCAAACGACGGATCTTTACTACTTTTTCTTCCTTTTTTTA
TTCTCTTCATCCTCTTTTGTCCGTGCACGTTTTCACTTGACAGACATTTGAAATTTGCTA
TTTAAAAATTTTCCTTTTCCCACGTTTCCGAAGACGCCCTCCTCTTTGTCATTGCAATTC
CATTTTCATATAAAGTAAAAATTTTTCCATATGAAGTTTGGTCTCCTACATCTAACAATT
ATCGATTTTGTTTGATCCCTTGGTATCACGATCTTACTAAAACAACGCCGTCTTATTTAT
GTTGAGCAATGCAATCTCTTCATCCTGTGTGCCTTCGAAGCTTATGCTGATCAAAGTTGC
TTTGCCATCATTTCCCTTGATGTGTTTGGCATTCTCTTAGGTGCTGAGCAAGATATACTC
TCTATCCGTTATCATGATGAATTACTACTATTTTCCGTTTGACTACTATTAAAAAGGATT
TACATCTATCTTACTATGACCATTATGAACTAACTTACTGAGTGGTGCTTTACAATACAC
ATATAAATAAATTTTTTTAGACACTTAACAAATTTAATTTCCCAAAAATTGAGATTTCAA
TTGGAATATTAACTATCAATAGTTAAATCAAAAATGTGGTTTTTTTAATATAAATAAACT
TTCAGAAAAATGAGTTCGGTTGGGTTTTCCAAGCATTGAAACCATAGATTAACACATTTT
ACAAAATCCTATTAAATAAAAAAAAATCCACAAACGTCGATACAGTGAGATAATCATTTT
CGAAAACTGACTGTTCGAAAACCGTTAAGGCAAGAATCTCCTTAAAGAGTGAGAGAGAGA
GCGACAGCAAAGAATGCAATCACAGCAGAAATACCAACAGGTTGGCTGACTAAAGAGGCA
GCAGATGATGAGCTGGAAGAGCTAGAGGCACTGGCTGAGCTAGAAGAGCTGGAGTCAGAG
GTGGTGTTGGTAGCGTCATCAGTGGTGTTGGTAGTGTCATTGGTGCTAAGGGCCTCCATT
ACACCTTTTGTGATATGTCCGCTAGCAGTGGTCTTAGAAGTAGTCAAACTCTTGCTGCTA
GTAGGGAGCTTGGTCAAACTGTGAGAAGTGGTACTGGTGGAGTTGGTAGAGTTGGTACCG
TTGGTAGAGTTGGTACCATTCAACCAGAAAGTAGAGTTGGTGGCATTAGAAGCATTGACG
ATGCAAGTGAAGTTAGTACCGTTAGTACCATTGCAATATGTACCATTGGTAGCATTGGTA
ATGTTGTAGTGAGAGATGGTGGTGTAAGGGAATACAGTAGGGCGATAAGAGGAGGACTTA
TGGGAAGTAGTGCGGTGAGAAGTAGTACGAGAAGAGCTACGAGAGGAAGACTTGGAAGAA
GAGGATGAAGATTTAGATGAGGATGAGGAAGAGGAAGAAGAAGAGGAGGAGGAGGAAGAA
GTGGTCGAAGGAGTGGCAGAGCTGGAAGAAGAGGTTGTGGAGGAAACCAAAGAGCTGGAG
GAAGAAGAGGAAGAGGAAGAAGAAGAAGCAGCACCCTCAACAATGTTAAATTGTTGAGAT
TGAGCATAAATTTGCTCAGGACGACCAGGGTAAGCCATGTTGATTTGGAAACCTTGACCA
GTGGGCCAGTTGGTGGTGTTGGTGGTGTAAGAACCAGTGCTGGTGTCAACAGTGTCCAAG
TATTGGGTAACGGTGGGATAAACAGCAAAGTTGGTCAAGTAAAGAGCAGCACTGGGTTCA
TCAGTGGAAACGACATTCCAGGTGATTTGCTCCTCGCCGTTGGTTTGCCAAGTGTCACCA
TTGGTGGGAGAGTTAATCGACATAGCGAGAGCAGAAGCAATCAAAGCCAAAAAGGAAATT
TTGAACAACATTGTAGGTATCGTAAAAGAGAAATATGTTGTGTAACAAACAAAAAAAAAG
AGTAAATAAAACTAAGTTTGATGTTATTTCGAGATGCTGGGTAAAAAATTCAAAAAAAAA
AGTGAATTTTATCAGCAAAAAAGAGTTGGTGGGACAGGCGACAAGTAAATAAGGAAAGTA
TAACTAGCGCAGTAGGCAAAACAGAAGATTGTATGAGATTTCCAAAAATGAATGGGTAAA
CAACAAACGTCGGTTAATCTTGTGCGAAAAGAGAAAACGGGGTTTTAATAAAGGAAAAAA
TAAAATAAATTTGACGGGATCAAAAAGATTCTCTAAATTTCAGGAGAAAGGAGGAAACAA
TTGGAACTTCAACAAATAATTAGGTTTAAATTGATAATAAATTAATTAGTTCAACAGTGA
AGTAATCCAAATGCAATTGAAACCAAAATCGTTTTTTAATTTAATTAGCAAGATGAGGAA
TTTAATTGACAAGCAATAAAAAAAGAACGCGACTTGTAAGAAGCGAACACAAGCAAATAG
GAAATATCAGTTAAGACGTTAGTCAAAAACTCCCTTTTTAATGGAACGAAAAATTTGACG
GGAAGCGCTTCTTATATACAATCACGGATCAACATTTTCGGCGCGATGACGGAACGCTAT
CCCGGACCCCGACTGTGTAAAAATGGTACAGTCTAGAAGCATCTAGTTAAATATTAAAAT
AATAAAAAATATTTTAAGAAACATGTTTGAGTAAAAAAAACTTTATATATGCTGTACTAA
TGCTTCTTTTAAATTTTTTCAAAGCGACCATTTGCCGTGTATATCAGCACATTCAAGGTT
TTCCACGCACTATCTCCTTTAGCTTTGACTAGGCGATAGCATTCGTCATATTGCGCTAGA
AGGATACTCGCTCGACACGAGGTAGCTGATGTCATTTGAAAGTCATTAAACGATCGCCAT
TGGCGGGAACCAGTTGCGCGGAGCATGCGGGAAACCAAGGTGATTACGAAGGATGCTAAA
GAGCGTAGGGATTAGGCATCGCTATTTAGTATAAAGTAAATTAATGGGTTTCACTAATAC
AGACAGTGATCTCGGTAGATTTGAACGTTACGTGTGTGTAAAAATGTAATATCGATCTTT
GTGGTAAGCTCGCAATATTTTTTAGTGTATAGCATTCCTTGAAAATTAAGATGGATTAAC
TATACAAGCAGCAATTGCTTTTGAGGTATACAATCAAAAGGCCATCATCCTACCCATTTT
ATATGAAAGCAAATGAATAGACTGCTGACGGGGCAACACTTAAAGAGTAAAGAATAAATA
CAATACGTAGGGCTTGCCTATCAAGTATAGATGGTGTAATCCTTTTTTTCTTTTTCGCTT
TTTGTTTTTTAGTACTTTTTCACACCTTTATTGAAACATATCTTTATTTTTTTTGATAAT
CATACTCTATATTTTGTTGCTTTATTTTTAGTGTCTTTTCTTCTAAGCTCTCTTTAGTAG
ATAAAATATCACCGATTAAAATGATTACAAAAAGTTGGGCTTTTCATTCTCTATATATAC
ATCTGCTATATACGTATTGAGTTTGCTACCAATTCTTAATAGCCAGCCCTCTATTACCAC
GAAACATCTGATTCAGAAAGTCAAAATCACTTTCTTCCGTGATTAATTGTTTATCTTGCT
GCTTCCGCTAAACTGTTACTTTGCAAACCTGACATTCCATAGTATCGGAAAGTTTCTAAA
GCTTTTGTAAACAAGACGGTCGTTCAGCCCAGGCTTATTGCTGACGATGTTAGTTGTATT
ATTAAATAATTTCTTTGATGAAAAAAGAAAAACTCAAACACCATGGGAAACATTTAGTAG
TGTATGAGAAGATTTGTTCTTTCACATAGCTTAATGTTCCAGTATATATTTATTGAGTTG
AAAACGAAATAATTTTTAACTTAGATATTGTTTTTTTTTTTTAAATTATTGTTTGGCTTC
TTATTTTTTTTATTGCATTTTATTTTATTTTGGGTTACTTTTTTTTTTTTTTAAGTTGAA
AATTAAACAAATTAGCCAAAAAAAAAAGAAATCGAATATGCTGAATTGAGCTATAGGGTT
GGATCCTATTAATTAGCAAAAATTCCTATAGTTTAAAAAAAAAAAAAAAAAAAAACAACG
AAAAAAAAAGAGAAAAAAAGAGAAAAAATATAAAACATATTTCTACTTCACTTTGTACAA
TCCATATTGTCTAGTCAAGTAGTTGCAAGCCTGTTCTGTATAGCGAATGTCAACTACGCA
GTTTATAATATTTAACGATACTTAGGATTGCAGTGAGTTTTCCTCGTGATCAATTATATT
GCAATAAACAGGTATTTTAAGTAGCAGCTGGGTATATGTATTCTGTTATGTAGGTCTATT
GTTAGTTATCACTAATGTAGCTTATAACCGAACTGAGGAACGAAGTTCAGTTGATTTCAG
TTTATAGTATTTGAAAAAGTCTTTAATTGTAACTGATATTTATATTATCATAAAAGGTAC
TGTAGCTGTCTTTTTAACCTACCATGTAAAGTAGATAGAGCAAATAGAACATTACAACAT
GTGACATATAGTGATACTCGGACACATTGTAACATAGCTTAGTTTCAGCTGACAAAACAA
AAAAAATACATACTACACTATTTATCAGTAAACTAATATTACATAGTAAAAGCATCTCGT
TAAATGTTTAAGGAGGTTTAAAAAACACATTAAACCACATACTACTGCGTTTCTCCACAG
TATCCACGGAGCGTCCCAGTATATCCGAGTTTTTATTAGAAGAGCGATTTAAGTAGTTGC
TTTAAGAAGATACACTCTCCTATCCTAAAAAGGTTTACTCATAATTATTGGTGGGTACCT
CTTTAAGTGGTTGAACTTTCTGCTATACGTCGTTTTTTCTATCTGTTGTTAGGTTGGAAT
CGCGTAAACAAATTAAAAAAAGCAACTTCGAAAATCTATCACTGGGCACTTTTGGACTGG
GATTGCTAGTACGTGTACTTGTATTTTTTATTCTTATTTATTTCTTTTTCAGGACCCACA
TCACAGTACAAAATTAGTCACTTCAAATTAATTTGCTCGTAATATTCCCAGGTATTCATT
TACTGTCTTTTTTTTTGGGTATCTTGTTTCATTTTCAACTTCATTCAATCTTCAAAAAAA
TGGAATTTCCTATCGATGATGAGGAATTGCTAGATGAGCGAAATAAACTTCTCCAAATTT
GCAATATGGACGAGCAAACAATGTTCTACAAGTGGGAGTCCTGGTGTTTGCAACGAGGAA
ATACACCAAAACTCGACCTTGACACATTCAAGGCCTTTGCTAAAGACATGAAATTTCAAA
TGGAGAGGCAGGTAAAAGCCACACTTAAACAGAATCCTGAAAGAAAATCGATAAAGCAAA
TCCCGGGAATGAATATTGATAGCATGTGCGTACATTAGCAAATGGTTTTAACTAACAAAT
ATCTAGACTAGGTCTACCAGTGAAGACCACCGCATCAGGCGACTCGTTGATGCAAGAGTC
TAAACCATCTACCGAAACTTTCGAATTGAATTCCAGTGACGCTGGAAGGGTTTTGGAAGT
TTTAAATAAAGAATTAAAAATTGTAACTTCAAAACCTTCAGCTCCATCCAAGCTGGTTAT
CGTAGCGAATTTTGATCTCAAGGCATTTAATTACAGGATCATGTATCAAAAGCTTTATGA
TTCTTCTGAAGTTCTGGATGATCGCATTGAGCTTTTTAGTGCATTAACTTGCAGAAAATA
CAACATAAGTGATGAAGATTTGGCAAATCCTAGCGAACTTACTCAAGAACCCGTTGTAGT
TGTAGGACGAATTGTTGTCGAAAGTACCAATTTAGGTGGAAGACTCAACCAAAATAGCAT
TTTACTTGAAAGTTCAAGACGTCTAGGCGCTGGTGTTCGAGTTCGTTTGAAGGTGGATGA
TCTACCAAGTTACTCAATATTTCCTGGTCAAATTGTTTCAGTTAAAGGATCCAATCCTAG
CGGTAACATGTTTATCGCCAAGGAAATCCTTCCTATACCTCCTTTGCCGTTCCCAAGTTC
ATCTAAACAGGAGCACGCTACCTTTGTTGCTAATACAAATAATCAGCCAATTTCTATATA
TATTGCATCTGGACCTTGGTCTCTCCGTGATGATCTCTCTTTTTCCCCTTTAAAATCAAT
GATTTCATATGTAAATAAAAATCCTGTTGACTTGGTTATTCTATGTGGTCCATTCTTGGA
TATTAATCATATACTAATACGTACCGGAAACATTACAGGAACGTCTGCGACTTCTTTGGA
AGAGTTGTTTAAAGAGCGTGTCACACCCATATTAAGCCAGCTAACTTGTCCTTGTATTTT
AATTCCTCACATCAATGATGCTGCTTCAGATCATCCTGCATGGCCACAGGATGCATTTAA
TCGGGTGGCCTTAGGTCTTCCATCTGTATGTTAAGTTGTATAATAATTTTTATTGACCAA
TCCATAGAACTTCAAATGCTTCCCGAATCCTTGCATGTTTTCCATTAATGATGTCGTCTT
TGGTGTGTCAACCAACGATATACTCCTTCACACATCTAGAGAAGAGTTATTTCGTCTACC
TTCTCATGGTAACTTATTTGCACGTTTGGTTTCTCACGTACTTCACCAAAGGCATTTTTA
TCCCTTATTCCCTGGAGGTTCTCTTGAAAAGTGCAACCCTTCAAACTTAGATATCGCACA
TCTTAAACTTGGTGAATTCCTAAATACTATGCCGGACATACTAATTTTACCAAGTGATTT
ACGTTATTTCGTAAAGGTATGTTAATTTTCTACTTTGTTTTAACTAATGTTATAGAACGT
TGAAAACGTTGTATCATTGAATCCTGGTAAAGCGACCAAAGGGATTAATTTGGGCACTTT
TGCAAAATTAACTATCGCGCCATTAGAGCTCGGGGATAATGGTTCTTCTAATCATTATTC
ACATCGTGTATGGCTTCGAACCAAGGCAGAAATTTTAAAACTATGATAATTATACTCTCT
TTTTCTGCGGAATTTATTGAAAATATAAAAAATTCAGCGTTAAATATCATTGGTTATCAT
TATTTATGTAGATGTCTACCATAGACCGTTAGAATTAATTAACTTTTCAGCTTTCATTTT
CTATCTATCGCTATTTTGGTTTTCTTCAAATTTTGTTTGCAAAATTACTCATATGTTTAT
GTTGTTAATTTAACCATTTTCCTCAAATGTCTAAGACAATCTCTGATATATCTCAAATCG
CTACTCGCGAACTTTTAGTCGTTGTTTTATAGTTGAATGAGTATTCCTTTTATACTGTAG
TATTTGAATGTTCAACATTTTTTCGATTTGGACTCTAGTCTTGGTGTTTCACATCTCAAC
CTACTTAGTCACTACAGTTGACCTCCAACATACATAGGGGAAGTAGTGCAAATGCCTGTT
ATTCCTCCAGAAAAGCTTGTGTCCTTACAAAAAAATCAGGAAAATATTCGTAATTTTACA
TTACTTGCTCATGTAGATCATGGAAAGGTATGAATTTTGCAATTTTAAACTTTTTTGAAT
AGTTGCTAATGATTAATTAAAGACAACCCTTGCAGACAGTTTACTAGCTTCGAATGGAAT
CATATCTAGCAAACTTGCTGGTACTGTTCGTTTTCTTGATTTTCGCGAAGATGAAATTAC
GAGAGGTATTACTATGAAGTCTAGCGCCATTTCATTGTTTTTTAAAGTTATAAGCCAAAA
TGATGAAAAAAGAGTTGAAAAAGATTACCTGATTAATCTTATCGATTCTCCTGGTCATGT
TGATTTCAGTTCTGAAGTATCTTCGGCCTCAAGGCTTTGCGATGGTGCATTTGTTTTAGT
AGACGCAGTTGAGGGTGTTTGTAGTCAAACAATTACTGTCCTTAGACAAGCATGGATAGA
CCGTATAAAGGTGATTTTAGTCATTAACAAAATGGATCGTTTGATTACTGAACTGAAACT
GTCTCCTATTGAAGCTCATTATCATTTGCTTCGACTTGTTGAACAAGTAAATGCTGTCAT
TGGCACCTTTTATACTGGTGAGCTTATGCAATTAGCTGATAACGACGAAGTCATCAGTGA
TGAAGGTATATATTTCGCACCTGAACAGGGAAACGTTGTGTTTGCTAGTGCATACGATGG
CTGGGCATTTTGTTTGGACCAATTTTCAGAATTTTACGAAAAAAAGCTTGGATTAAAACA
AAAAGCACTTACAAAATGTCTCTGGGGTGATTATTATCTAGACCCTAAAACTAAAAGAGT
TCTTCAGCCCAAACATCTTCAAGGCCGACGGTTAAAACCAATGTTTGTACAATTTGTTCT
CGAAAACCTCTGGGCTGTTTATGAATCAGCTGTGAGCAATAGGAACCTTGAAAACATTGA
GAAAATCATTAAGGCATTAAACATTAAAGTTCTTCCCCGTGACATCAAATCCAAAGACCC
TAGAAATTTGCTACTTGCGATTTTTCAACAGTGGTTGCCACTATCAACTGCAATTTTGTT
AACAGCGATTAGGGAAATTCCTTCTCCTATTAACGCCCAAGCGAATCGAGCTAGGAAAGT
TTTGAGTTCAACTCCTCATTACGAAATGATAGATCCAGATATTACACTGGCTATGGAAAG
TTGTGACGCTAGTAAGGAACAGCCTGTTTTGGTATACATAAGTAAAATGGTAGCTTTTTC
TGAAAGAGATCTTCCTAATCATCGTCGCAAACAACTTAGTGCTGAGGAGATGAAATTGAT
ACGTTCAAAATTATCTGAATCAATTGAGAGCGGCATAAATACCATTTCTATTGAGGAAAA
CGTTTCTTCTACCAACTCTGACAATTTAGAAGGTAGCACAACTGACATGGACGATGATAA
GGACATTTTAATTGGCTTTGCTAGGATATACAGTGGCACAATTTCAGTTGGACAGGAAGT
ATATGTTTATGGTCCAAAATATGATCCAGTCAATCCTGAAAAACATATTACCAAGGTAAC
GGTTGAGTCATTATATTTAATGATGGGACAGGAGCTAGTTTATTTAGAGACAGTTCCCGC
TGGTAACGTTTTCGCAATCGGTGGCCTTGCCGGAACGGTTTTGAGAACAGCAACACTATG
CTCATCTCCAAATGGTCCTAATTTAGTGGGCGTAACTCAGCAAATGGAGCCCATTGTGCG
GGTCGCTTTAGAGCCTGTTCGTCCATTTGAGATGAACAAGTTAGTGACTGGCCTTGACAT
GCTTAATCAAGCCGATCCATGTGTTCAAATAGCCGTTGAAGAAAATGGAGAGCATGTAAT
TATGTGTGCCGGAGAGATTCATTTGGAAAGATGTTTAAAAGACCTTAGGGAACGGTTTGC
AAAAATTGAAATACAAGCATCTCAGCCACTTGTGCCATATCGGGAAACTACCATAGCTAC
ACCCGACTTATTAGCAAAAAATAAAGAACTGAGTATTGGCTTTGTCACTGCAACGTTACC
AGTTGGCGGAGTTACGATTGGAATTACAGTAACACCTCTTTCTGGGTCTGTCGTAGATTT
TCTGCTGAAGCACTCTAAAACAATTGAAAATGTTAGCAGCAATTTTTCAAAGAAAAATAG
AAACGTTGTTGTCTCGGAATCTTTAACAAAAAGTATGGAGGAAGTGTTGACTCCTGAGAA
GTTTTATGAAAGGCTTTCCAAGCTTTTAGAGGAAGAGAACTCTGACTTAGGCGAGCTGAA
AAATCATTTGGATAGGTAGGTTATACTAGTGTTCTATTGGTTGATTACTAACAATACTAG
TATCATTGCGTTTGGCCCCAAACGAGTGGGTCCTAATATACTTTTTGACAAAACCAAGAA
GATGAGAGATTTTCGACGACAAAGCGATGAAACAAAATTAATACCCTCAGACCTTTCTGA
ATATGTAGTTACTGCATTTCAACTAATAACGCACCAGGGACCATTGTGTGCTGAACCCGT
TCAAGGCATTTGTGTGTCAATCGATCAGTTTGACATATCTGATGACTCGGAAGATAGTAA
GTTACTTACCATCAATAATCCCCAAATCCCCGGTCAAGTTATTTCGGTAGTGAAAGAGTC
TATTAGACATGGATTTTTAGGTTGGTCACCGAGACTTATGCTAGCCATGTATTCTTGCGA
TGTTCAGGCCACATCTGAAGTCTTGGGTAGGGTATATGGTGTTGTTTCGAAGCGACGAGG
ACGAGTAATTGATGAAGAAATGAAGGAAGGGACTCCATTTTTTATTGTAAAAGCCTTGAT
TCCAGTTGTTGAATCCTTTGGATTCGCTGTAGAAATTTTGAAAAGGACATCTGGTGCTGC
CTATCCTCAATTAATCTTCCATGGTTTTGAGATGCTAGACGAGAATCCCTTTTGGGTTCC
AACTACTGAGGAGGAATTGGAAGATTTAGGCGAGTTAGCCGATCGCGAAAATATTGCTAA
GCGCTATATGCTGAACGTTCGAAAAAGGAAAGGCTTATTGGTAGAGCAAAAGATTGTTGA
AAAGGCAGAGAAGCAGAGGACACTGAAGCATTAAAGATAGTACTTGATTCCAATTTCTTT
AGGAAAACGAAAAGATTGTAATTTGATGACAATGACCTGGTTAGATGGAGGTAATGTTTT
TTTTTTTTTTTTTGTTACATTGTTGAGGTAGCTGTGATTTTGAGTTAAGTGTTTCATGAA
CTATGGGACTAAGATTAGAAGTCTATAAGATGAATAGTGTAAAACGCACATGCAAGATTC
TTTAGGCTTCTTTTTGTTATGTTTTAAATTGTTAATACAAATTCAAATTTCCAAAAAATA
CCGATGTTGTGGGATATGCATAATACAAATAATGATATACTCTACTGCGTAATCGCTAGA
AGGTGATAGATTACAGACGCGACGCGCCAAAACACAAACACATCTTTGTACTAATTCAAA
TTCTAGTATTTTGAAAACTATTCGCCTTAATGTTTTTTGACGGATGGAAAATGCAAAAGA
TTTTATAGGAGAAACAATAAAGGAGAATGGATTACTTACCATTGAAGATGATGGTAGCAG
TAGTTCAGATGAAGAAGCTACTTTAAAACGACGATTGGCAGGCCCTTCTGTTCTCAAGTC
AGGACAGGAAAATGTTAATCAAAAAAAGATTAACGAGATAATTTACGAAGCTTCCAAAGG
AAGTAAGTTTTTTGAAGCCGAACAAAAACGAGACCGAGAACTTCGTTTAAGAATAGAAAA
GGTTCAAGTTGAGGTAGAAAAATACCAATCAAAATTAAGGTTTGATAAAGCGTTTCAAAG
AGAGTGGACCATTAGACAAGAAAGTGTGGATACTACTGTTGAGGATTTTAGGGCTAAACG
AGATTTGACCCAAATAATTGTTCATGTTGATTGTGATGCGTTTTATGCATCAATAGAGGA
ACTTAAGAATCCAAAACTTAAGTCTTTACCAATGGCAGTCGGGAAGAGTGTTTTGTGTAA
GTATTCGAATCTGACTGAAACTAATGCTGAATAAGGTACTGCTAATTATGTGGCCAGAAA
GTTTGGAGTTCGATCAGCGATGCCAGAATTTATTGCTAGAAAGATTTGTCCTGATCTAGT
TGTAATTCCGTTAAATCTTTCTGAATATGCAATAAAATCTAAAGAAATTCAGAATGTGCT
TGCTCAGTATGATTCGAATTTGTGTCCTGCAAGCATTGATGAATTTTATATGAACTTGAC
TTCACATTTACGTCTCCAAGAGCTTGCATTTACTGTAGAAAACATAACGATGGTGGTTGA
GAAAATCAGGAAACAAGTGCATGAAGAAACAGGAGTTACAGTCAGTTGTGGTATTGCAGC
AAACAAGTTGTTAGCCAAAATTGCAAGCAATAAGAGAAAACCAAATAATCAGTTTTTTAT
CCCATTTGACGAGATTGGGATTTCAAAATTCATGAATGACTTGCCTGTTAGAGAGGTAAG
CAGTCTTTCTATATCTGGTTAAGCATTCTTTAACATTACAGGTTTCTGGTATTGGTAGAG
TTTTAGAGCAGCAATTACTTGGTTTGGAAATTAAGACGTGTGGGGATATTCAAAGAAATT
TGGTGATTTTATCTTATATCTTTTTACCTAAAAGTTTCCAAAACTTGTTGAGATGTAGCT
ATGGATTTGGAACTACAATTTTAGACGAATACGGTGAGAGCAAACGAAAAACAATTGGGT
CTGAAGCTACATTTTCCAGCAATCTTAGTTCTCCGTCAATAATCGAGTACAAGCTCAGAC
TTCTTGTACAAAATGTATCTGAAAATTTACAAAAGCGCGGATTAGTCACAAACTCGATCG
CTATAAAGTATAAAACAAGCGAATTTCAAGTTCATACCAAGCAAAAGAGCATAGGTCAAT
TCATTCATTCAGAATCTGATTTATTGAAACCAGCTTTGCAATTGTTGCGTCAATCTTACC
CTATGACTATTCGTTTATTAGGAGTCAGAGCAACAAAGCTGGTTAGTAAATCGCGTTGTT
TGGCCATGCAACTTGTAAGTCAAGCAAATATACTGCTAGCAATATGCTAATTATTACTAG
AAATTCCAAAGCCAGAATACCGTTCCTTGTCCCGTTTGCCAGAAAAATATTGAAAACGAA
TTAGGTATACTGAACCAACATGTCGACCTTTGCTTAAATGTCGAAACAGTTAAATCCTTG
ATCAATACCGATCATACTGCAAATCCTACAATCAAAAAAAGAAAATCAAACACATTAGAC
ACATATTTCTTGGAATAAAATTTATTAATCTTGACCTTAAAGCAACATTAAATAAGTTTT
GGATTGCGAATCATTGCGCAACTAGCTTATGGTAAAAGTATTTGACAGTTTGTATAGACC
AAGTAAAACTTTTAGAGAAAGAATGTCAAAGACAACTATTTTTAGATAAAGTAACCATGC
TATTTTACAAAATAACATTGCGGTACTGAAAAATATTACATAAATGTCAACGTCAATTGT
AAAGTCATCGTCAAACTCAAAGATTGTAAGGATAGGCCGATTTAAAGACTTTTAGCAGCG
ATTCCGCACATGATTGCGACGCCAGCAGCGTATGCGCCAAATTGGAAGATGGACAAAGAA
GTCCAGTAAATAAACAACAGGATTTCTGCAACGGCCAAGGAGGCAAAGCCAAACGTTCTA
GCAAATGAAGATGATGACACAGAGTAAACATTTGATTTTGGTAACAATTTCTGCCACACA
CCGAGCAAACCGATTAAACTAACCACTACCGAAACAGAAAAGCAAATACTTAGAAAATAA
TTTGCCCTTTTAGGAGGGGGAGAAAATGTATGAAGAATTACTTCTTTAGGACTTAATTCG
TCCAAAGGAGAAAATTCCGCTTTATGGTACAAAGAAGGAGGCACATTAATGGAAAGTTGA
CCCAAAGGAAGTGAAAAAGGAATGGTTTCACCAAAAGAAGCAACAAGTAGTTTAGCCGTA
AGAGTTGAATCACTTCGAAGTAAAGAAGTGGGAATATCAAATAGACGCTATAAGGTTAGT
AAATTAATCGCTAAGAGAAGTATTCAAAGTGAGAATTCTTAGATTAAATTAACATTCTAA
GCTGCAATTCAACCTTTCCCAGCGTACCAATTCTAATGAAGCGACGCCTCCTTGCGATAC
CGAAGCAGGATAGATCACAGCGAGAGTCGGGTGTTCAGTATCGCTTAGTAAAAGATGTGC
TTGATGAGGAATAGCTCCAGTACCATTTAATATACAGGTAAACTTCAGATTTAGAGTCTC
ATCGCCTGTAAGTTCATAGACAGTGGAACTTTGGATTTGGCTGAACCTAAAGAGATAAGA
GAGTTAGAATCTTCAGTTTTATAGAATAGATTGGAACTAGTTTTCGAAAACGGTATTTCG
CTAACAATATACCTACTTTAAATCATAAGCATTTTCAGATTCTAAATCTTGAGAAGACAA
CTGTAGAGTTCCTTCTTCCACATTCCAAGAGGCACACAAAGCTCTTGCGAATAAAAGAAA
TCCAGCAATTAAAAAAAATCCTTTCATTATAAATAAAAACTGCACTCTTTACCTAGAAAA
CGATAACCTCCTCTAGTAGGTGTTGAGCGAATATGATGGATGTAGGAGAGACTACTTTAA
CGTGTAGCCTAATTAGTGCCGAACAACGCCATCACTGTAATTCATTGCGAGTAACGCACT
GAGTTTCGCTAAACTACACTACATAGCAAGCAATGGAGAATTAAAAGTTTCTTAAAAAAA
GATTCATTGAGTAATTAAAAGATTTGAATGAATGAATATTTAAAAAGAAAAAACAAGTGT
GATTGGGTATATGATAAGTTCCAGTAAGCGTTTTTAGATTTTATTAATTGTTTGATATTC
AGTTTACAGCATTGCTGTTTTTGACTTAGAAAATTCATCATATGTCACCATCAGTAAATT
CTTGGTCATAATAAATAAAAAATTTCAATGCCCGGTGCATGTTTCCAACATCACAGAACC
TTTCAAGCAATGCACTTGCTCATCCATTTCGTCAGGAAATGAAATCATGCAATAAAAATA
CATCTGAAATACTCTAAACACATCATGATTTGTTTGGTAAATCACAATTATATAGATGCT
TCTTTCCATTGCACATTCTTGTAGAGAAGTTTCGTGAGAAAAGCGCCTTTATAAATCAAT
AGTAAAGTTAGCAATATAATTAGGCTTCATTTTCAGGGTTCATCTCACGTAACGGAATAG
CAGTATTGCTGCTCGCGTACTGTCTGGCCTCATAACCTAATGATAATTAGCATACACAAT
TAAAAAGATATCATTTTAAATTTACCCATCTTTCTGATCAAGTTGACCCTGATTGATCCA
GGTTTTACTGTATTGTTAATATAAATAAGTGTTTAGTCAACAACAAACCTGTTTCAGCAA
TAAAAACAAGGATGCTCAAATACAACAAAGATAATGTGATCAGCCAAAGAACATTTCAAT
CCCCATCTGTCGCCAAAAATGTATCTTAAATTCATTCTTGGTGATCTGACAAGTATGTTA
AATAAAAAGACTTCACTGAAAGCCATAGGCATGTTTTCCCACTTCTTTAAAAAGTGCTTG
ATTCCTTTTCCGCAAGCCTTGACACATTGTGCCAAGAAAATTGCAGTCACCTTTACACAT
TTCGCCAAGGAAATTACAGTTACTTTAACTGCCTTGGTCCAAGTTTCATAGAAGTCTGAT
GAGTTAGTGACTGAAGGTAAGATTAACCCCATTGTCTCACTTACAAGTCAAGAATATTAA
AGCCAAAGTGCAAACAAGACACCAAAATCCAAATAATGTCCATTCCGCTGCACCATAATT
TTTAAAAAAAGCGTCCTTATACTTTAGATAACAAACTGCTGGAGCATTGAATAGAATGAT
TGAAGTGAATGATATTAGCAGTTTTATCAACAAAGGGGAAGAATTATCTGTCGACCTGGA
AGGATTGTTTTCTCTATGTGTGTTAGGAGAATTGCTTAAACGTGCATGATCTGTTTAAAT
TAATATGATTGAAAGACTTTAGTTAAGAAAAAGCATGCATCAAAGTGTGTGCATTGCATG
GCCAACTGTAAACAATGACCAAAGCATGCAATTTGACTACGATGGCAAGCTTCAACTTTC
AATTGAATAATTCCTTTCTTATTATTTACAATTCTTACCTGAATATGGAGGCAATGTACT
TTCCTCCTCTGAATCATATTCTGGGAGGGGTCCTTTTTCCAAATCAAATTTCATGATCTA
TCTTCAATTCATCTTCTTCATCTATAGAACTTTTCAAGGAAGTGTAATTATTCTTCATAA
TAATAAAATCATTCTTTATTTAATAAAATACATGCGCGAATTAATTGCTATGATTGCGAC
AAACCAAACAGCGAAATCAAGAATATTCACTCTGTAGTCCAATTCCAATCGCTTTAAAGA
CTTTTTAACAAAATAATAAAATCGTTCAAACAAATTTCCAACTAATTCCTTCAAACAATG
GCATAAAAAAAGAAGAACGAAAAAACTGAACGAGGCAGTGGATTGCTTCTGACACATTTA
TTTTGTCACTGCCTTTTTTATTCACCCCAACTTAGCTTTCCTTAAATGTAAGCTACGCAG
TTTGGTATCTACTTTAACGATAACATAGAACTGCGGTAATTTTTCCTTGTTAACTTATTA
CAATACACAGGTAGTATAAGTAGCAACTGAGTTTAGGTATTGTACTATCAAATTGTATTG
TTATTTATTACAAATACAACTTATAATTGTGTAAGGAATGAGGTTTAGCAGTAACTCTAT
TTATGTTGTTTAGATGATTTGGATTTTAATAGATTATTGTTAAAATTAATATCAACATCG
TATCATCTGCGGTGCGATATGTAAATGGAACATGTGATATATAGTGATCCTCAACGTATG
GTATTATAACGTAGTGTAGTATTGCTGACATAGCATACTATGGTATGTTTCACTGTGGCA
CATGTAAGAGTACTAGGTAGTAGTTACCATTTAAGAATTGCAGATAAATTTCATTTTATT
TATATAGGTCCCTGACAAGGAGTAATTGAAATATTATAAATTAGTGACAACTATACCTCG
CCCCTCGGTTTGTTAATCATTACTTCAGTGATGGTAACTTTATAGCGCCTATATAAGATA
CCTAAAACCAATATTACCTGTAAATGTATATATATGATAGTAGTAGTAGTTCACAAGGAA
AATGTAACGCCGTTCTATGTGTTGTTATAAAGCAGATACCTAACTGCATAGCTCAAATGT
ACCATCTAATATTATGTATATTTACCTTATCGAGAGTTTTACAAAAATATCGCGTGCTTT
ATGAGTTAAAAAAATCTATAATGTTATTACTATTTTAAATGATTCATATCAAGAACAGCA
AGCTTCTTTTTGCTGGCTCCACATCATTCTGCTAGCGATACGAACGAAGATTTATAAAGA
GTACTGCAAACTGAAGCTATTGATCATGGCACGTGTATATCAGTAATGAAACCAAATGAA
CTCTCGATAGTTTAAAAGGCATTCACATACATTGTTAATACATGGTGTACTACGTTGATA
TGATACTTCGGTAAAATCAATGTGCATACTAAACATAACAACAGAATTGCAAATAAAATA
ATGGATTGTTTTGGTGCGATTTATTATTTGGAATATTAAGTCTGAGGATGTCGAGCTTAC
AAGTTATAATTGGTGATCTCTATCAACTCATTGTGTGGTACAGTGTCTAATTAAATGCCA
ACAGAATTATCATTCTCCTTTCATGGATCCTTTTCCGTGTATATAGGAAAATCGCTTAAA
TGTTCATGTTGAACGCTTAAGATGTATACAGTATACAAAATTTTTTATGTTTATTTTTCC
TACTTCTTTCTAAAGTTGTATTGAATCATTGCATTGAAGAAATATCAATAAAAATCAATC
AAGTGACTGAATTCTACAATTACTCCATAGTGTCTTATTTATTGAATAAATGAATATTTA
CGTACCAAAATAATTAATATGCATGTGTGCAATAATAGAAGCAAAATTATTGATTGTTTA
CAATTCAAATTTAGTCGGCATTTAACCTTTCCTTCGCTTAAAAATATTATTCGAGTTACA
TTATTTTTTTGAATCACATGGCTAGATGTTAGACTTTCTGCAGCGAGCAGGAAAAGAAGG
ATATATCATTATGCTTAACAGAATAACACCAGCATCAAATAAAAGAAGATATTTCTATCC
GGTAATTGCAATTTACTAAATTAATAGAGATTTAATTTTCTTAGAACAGTATGGCTTATA
TAGTGTAAAATCCCACTGTTTCTGCCAAAGGTCCTTCTACTGTACATGGACGTGTATCTA
AAGCGCGTATGGGCTATCCTGTAAATAATACAGAGAGAATTAGGTATAAACGATACTGAT
GTTAATTATTTTTGTTGGCTCCAAAGGACGATCATATTTATCTGTTTCACCTTGCTCAAT
CCTGTGCACAACATCCAGACCAGCATATGCTCTCGCAAAAATAGTATGCTTGCCATCTAA
CCATGGGGTTAAATCGGTCGTAATAAAAAACTGAGAACCATTAGTGTTAGGACCAGAATT
TGCCATAGAAACAGTAAAAGGTCGGTCATGTTTCAGATTCGGTGAAATCTCATCCTCAAA
ATCCTTTTTCCAAATAGATTCACCACCCGTACCATCACCCAAAGGGTCTCCCCCTTGTAT
CATGAAATTTTTAATAATTCTGTGAAAAATCGTATTATCATAGTATCCATTTTCGGCATG
GGTTGTGAAGTTTTGGACAGCTTTAGGTGCTTCTTCTGGGTATAACTTTATACTAATGTC
GCCCTGAGTTGTATGAATAATTGCCGCTTTCCCCAGAAGAATGTTCCCATTTTCTTGTCG
ACCCTCATTATTTGTAACAGGGAGCACCTGTTCATTGTAAACATCACGATCAGAAAGCGT
AAACTTCGTTGACATGTTACTGAATAAATAAAATCTTTGCTTTTTCCAAGCGGTAGCAAA
AAGAGTAGGGTCTTTCTGAAAACTCTCTTCTACCAAGGGATTGTTGCTTGCAATAACGTC
TAAAGAAGGTAAATTGCTCTTTTTGGGAGCTTGTTGATACAGAGACAATCGTGTAAATCG
TACTGCTTCATCTTTTCCATAAATACGGACAACGGTACCATTATCAATGCTGACAACCTT
TATCCCAACGATACTTCCATATAATAAATATTTTTCGCTTTCATCAAAAATAGCAGTCGT
ACCTACAGTAAGACCGTGTTTCTCGATATCACGCTCAATAGCTATTCTTCGCCCAAGCTC
AACATGACTCATGTAATAAGAAGATTCTGTATCTTCTTTTTCGAATAATGCCTCTACCTT
CTTTGCAGCATTAGAAGGGTTCTCGTCCAACTCAAGGATCGCACGGCCACTTTTGGTATC
AAAAACTCGAACTTTGCAATCCGGATATGAAATCGTGGACCAAAAGTTTTCAAAATGACT
CACTTCTAAACTCGTCGGTACACTTTTTTGCTTTTTAAAAATGTAAAGATCCGTTTGACT
TTTCATGTTAAACAACTCAGCTGTGTCAGGCTTTTGAAACGGTTCTTCTGGAGACCAATA
TTCTACCATGCCTCCGATGTCAATGCTCAAAAAACAATCTAAAGTACTTAAGTATCGCAA
ACAATGTACAGGAGCGGTGTGCTTTTTAACGGTATATAAAACTTCGCCGTCCCCACCACT
TTCAAAAAAGAATATTAAAGGGGATTCAGCGCTAGAGACAGCAATTAATGAAGTTTTTAG
GGAAGGGCTATTAAAGCAGCAGATTGCTTTTGGAAGGAATTCTAAATCAATAATATTCAC
TAAGTCAATGCTTTCAACGTCAAATACTTTTAACGATTTATCATCTGCACCAGTAATAAA
TAATCTCTCATCCTGACTTAACTCAGCTGAAAGAAGCATTGCATTATGAGCATGAAACTC
TTTAATGTATTCCACACCGTTTGGTGTTTTGTGCCAAAATTTGACATATCCATCATAACT
GACACTCAAAATGTAGTTGCTCTTAGTTGGAAAACATTTGTAAATTTCTGCATTATGCAT
ATATGATTTCGTATACCTTGGAGCATCAGGAAGATTGTGTAGAAATACTTGATCATGATT
TTCTAATAGTACAAAGCATCAGCATCATCGTACTCAAATCAATCAAAATTTACTTACGTT
TTATTCGCTTTTTGGGCAAACCAACAGGTGAAACATCACGGTCAACTGGTGAAGCACCAT
CCATCATCAGCGTAGCGGTTGACTGCTAGGCTGGTGGATTTCATATATAATACAAAAGGG
TGACGCCATAACAAGGTTGAAAGCGAAGAGTCGATTTTTTCATTTTTATTTGCTTAAAGT
ATACTAATGCTTTAGATTTGTCTAGTCTTACTTCCCACGTCCGTATTCCTTGCATTAAGT
TCTGGCTCAAAAAGCTTTGAACGAAAATCTCTATATAGGTTTGAAAGGTGCTCAAACTCT
TCCGAGTTTAAGCTTGGACTATTTTTCTTCAAAGCTTCCATGAGCATATAATCTTCTATT
ACGACACTTTTTGAATCACTCATACTTTGCATATTTTGATTATAGCGACTTTCAGGTGGA
AGAGCAAGCATTGACGCATTCCTTTTTGACTCAGTCGTCAAGTTAGTGAAGGAACTTGTG
GTTTGACTGGGGTCCACTGCGTTTATACTTACACGTTTCAATAGTTTATGAACAGCAATC
AAATGCGCATCGTACAGAAGTGACGATAAGTCAGCATAAGTATAACCATCTGTTAAAGTT
GACAATTTCTTTAACATGGCCGCATTTTCAATATGGAATCGGTTTGCCAATTTCTGTAAA
ACTTCAAGTCTTTCTTCTTCGTTAGGCAAATCACAGAATATCAGCTTATCGAGACGACCA
GGACGTAATAATGCAGGATCAATCATATCAGGCCTAGTAGTAGCTGCCACAATGTAAACA
CCATCTAAGCTCTCAGCTCCATCCATTTGTGTAAGTATTTGATTAACAACTCTGTCCGTA
ACTCCAGTACTATCTTGTCCTCTTCTGGGTGCTACTGAATCAAATTCGTCAAAAAACAAA
ACACACGGCTTGGCCATTTGAGCTCTACTGAACAAATCTCGAACACCCTGCTCCGATTTC
CCAATATACTTATCCAAAAGTTCGGGCCCTTTTATGCTTATAAACTGAACTGGAAAAGTA
CTTGAAATTGCGGAAGCCAAATACGTTTTGCCGCACCCGGGATAACCAAAAAGTAGAATT
CCCGTGGGAAGGCGAAGCCTACATTGTTTATATATGAGAGAGTATTTAACAGGAGACTCT
ATTATATCTCTCACAGCTTCTTTCGCTTCTTGCATGCCCGCAATATCAATCCACCGAATA
CTGGACTTGACAAATTTAGCTTTCCGAAGCTGCAATGGGACAAAATCTTTTAAGGTCTTC
TCAATCAATCCCTTATTCATTAAATGTTTTGGCCCATTTTGTATCTTTTCAACAAAAGCT
TCAGACAGTAATCGTTTCACGAATAAAACTAAATCTGTCATCAGGTAGCCTTCCGTTTTA
ACTGAAATAAATTCAATACTATCCATAGTTATATCAGAGAAATTTTCTTGAAAGATAGTT
GTTAAAATTTCTTTCCTCCTAGTCACAGCAAGCGATGGTAGAGCTATTTTTATTTGAAAA
AGCAAAGGCAAAACTAAATTTTCTGAGAAAGTTAAAAATTCCTCCCCAAATCCAATGAAA
ATTATTTTTCTTTTTCTTTTTAAATTAATTATTTGATGTTGCAAAAATGCTATTTCTCGC
TCTTCCACAAATCCAAGCTCCCCATTTTCATTTGAGGAAGATATAAGACAATGAACATCA
TCTAGATAAATTATTGAGGGTTCGTACCTCTCTGCTTGTATAAATACATTGTTCCAAAAG
CTTTGGAATTTGGCAAAAGATGATCGATCGATTTCTGAACAAGATACAATCATCTGGAAA
TAGATTGAGTTAAGAGAATAATAATCAAACAATGAGTGAACTAAATTTGATTTTCCACAA
CCTTTGGGTCCATTGATATAGATATTTTGGTGCAAGAATACAGCATTTCGTACTTGCGCA
AATTCATGCGGAAACGGCTGCATAGACAAACGAGGACTATTATTTCTTATACCTGCATTT
ACTGGGACGTTTGTATCACTTGTAATTTTTATATCTTGAATTGGATTTTTAACAACACCA
CTGAGTCCGCTAACAGAATAAGAAACTGCTATGTCAACAAGTTTTAAAGTCATGCCGTCC
ATTAAATAGCTGTTTTTTAGCTTGGCAGCCACCAGCTCAGAACTCAAGTTGCTTTCTGGT
GGAAGACCCTTTTGCTCTAGAATAAATTTTGAGGAAGAGGGAGGGTTATGAGCCTTCCAT
ATTTGGAATTTGAAACCTGTTTTTATGCTGTATGACAAAGCTAAGCTCTTTGAGATAAAA
AAATGACCAGGTATTTGAAAAGGGCACGATACACATTGACATACAATTGTGGATTTTAAA
TTTCCACCATCCATATATACTACATCTGGCCTATCCGGAAAATTTAGAGGTAGAAATACG
CAAAGAGCTGGTGAATCAGCAGTAACGCTGTCAGGCAACAAGCGGTTTTCTACAACACAT
CTAAGATTAACTTTTCTATTTTCTTTAACTTCAATGGCAGATGTATTGGGTTTGGGAGTA
ATCAACACTTCAGTAGTTCGTAACAGGCGCCCGCATAAAGAACTGGGAATCAATTTAAGA
GGCTGGAATTGGATAAATGTACCGGAAGGAAGATAAATAATAAATCTCTCGGTGGTAGCT
ACACGATATTGTACTAAAAGATTTTCTTCCAGCCAAGCTGCATTGCGTTCAGCGATTTCC
CAATCATTAGAGGTGACAGGTTCAATTTCTAGCTGCTCAATTTCATGAGTACAATCGATT
ATTGATAAATTTATCTAAGAGATTAGTAAAAACATTTCATTGCTGACAAATATTTTTACC
TCTTGATTTTCTGCTAATTTCAGAGTATGGGCGTAGGTAGAATCGATCTCAAATGAAAAT
TGTGACGGAATTCCAGAAATCCCAAAATAAAATGTTTTCTTTATATCGTTTTTACAAACT
ACAGCCTGAACGGCGTAGTTTTGGACAGGTTCAGAGATAGATTCCAACAGCAATTCCGGA
ACATTAACCAGACATGATCTTAGACTTTTATACGAAACAATACACCGCATATACTATTTA
GAAGTATAATTATATAGTTTGAAATAATCAACTCAACGTTACTCGTATTCACCGAGTAAA
ACTTATTAACAGTAGTATGTTGTTGCTAAAGTAAACTTATCTTGAGGACGAAAACTATGT
AGTAGCCTCCTTGCACACTCAACAACTATGGTCGAAGATATATATTTTTTTTTTGTCAAT
TTATTAAAGGAATAAATGGGTTGGAGTGCCAAATTTTTTTGTGAAAAAAATTTCAAAATT
CAAATTTACAAAAAGATTAATAGTAACAATAATTGAAATTTAAGCATCATTATAATCTGT
TCTTCTAATAAGAACGTGACAGACCCTAAAACTCCTTCAAATACGTTTATGGATTTTATC
GTATTTTTTTATAATTTACATTTGGTCTGAATTTCATGATGAGTTTAAACAATATCAGTT
CCATTATTAAGCTAAAAAGTAAATACTAAAGCATAGGAAAAGTTTATTGTGAAATGTTGT
CTATTTCAATCTCATCCTTTGAACGCCTCAACTATTTTTTCCTCTTGTTAACACATTGCT
ATACGGATGTACTAACGAATTGTATCGTATGAAACAAAATAGTTAATATTACAAAAATCT
TTATGTTAAAACATAGGGCTTACAGCCTCTCCATTAGAACATCACTTACAAAAATATTTC
TGAATTCTAATAATCAGTGATTTTTGTGTGTAATGACAAAATAAATCAGTATGCATTCGA
CTCGTTCCAAAATAAGGCGCCTAACAGTAATTAAATCTCAATATACATCACTTTCTTTGA
TGCTGTTCAAACTTAGAAGCTAGGGCATCGATTTTCTTGTTTTGCCAAGTCCAAGAAGGA
TACAAAAATTGACGAAGGTCATAACGATTGTCATCTACTCCATACGTTTCAGCATGATAA
CTGGGAGTCAAAGTAGTCATTTTGTGACGATTGATTCCATAATAGTGAAAAAATCGCTTA
ACCTTTTCAGCAACCTTATAAAGTTAGCGAGCAGTCATTACTTCTAAAATGAATAATGTC
ACTTACCTGACTTGGTGATAAGCGATCTCCCCATTGATGCATTAATTGAGTGAACATGCT
ATAAGGTCCACATTTCGAAATTTTTCGTAATCTACCAAAAACGCTGAGTTCAGCATAAGT
CATTCCCATATCAGCTTCATCGCTTTGAACATAACTTTCAGTGGTAGGTTCGAGTTCAGC
AGTGGGCGTCGCGTCCAAAAATTCCTGAAGGATTGGTAAATCTAAGGCCTCCTTGGCATA
ACGTAAAAATGATTTTAAATCGGTTTTAGAAATACCTCCTATGGGATTAATGTCGGCACT
GGAACAATCATATTTGGTCAAATAGCCGCGAAGACTTGTAAATTTGTCAGTAAATAAAAT
AAAATTATAATAGAAAAGCATACCACTCATCCACATTGGAACTTCCTAGCACCAAAAGAG
ATCCCGAATACCCACGAACCCATGGCAACAGTTGAGCAAATAGATATCCTAGCAACATTC
GTGACCGAGCCTGAATGTTCTGTAACGCCAAATTTTCAGCATTTGTTCCTCCGTTTGATC
TAAATTGAGGGGTTTTGCCAGTTACTAGTGCGAATAATTTAACAACAGCACTGGTCATAG
TGTCGATGTTCACGTCTGTATGATAGGACCCAATCAAAGAAGACAGTTCTTTCGCTCGAC
TCCTTGTTTCTTTAGAGGAATGTTCAGAACCCATAAACGCAGTATAAAATAAGTGGTTTA
AAAGCTTTTTAGGATCAGTAGAACTATAGGATGGATCACCAACGATTCTTCTAACATCTG
ACAAAACCTGTGCATCTATTGAAGGTCAGTAATTAGGATGCAAAAGTTTATCGTTACTTA
CCATCTTCTTCCATGGCTTTGCAAACAATTCTGCACATGCTATAAACCAAAACAGCAGTA
GAACAAGAATCCAAACCACCGCTCAAAGGCAAAAAGAATCCAGCTGCATGAGATCTCCTC
AAATAATCCCAAAGCCAGCAAGCCGGACCAAAAGTGATTTCTTCCTCAGGTAAAGGAATA
GTAACTTCAATTGGATCAGTTGGTTTTCTGTAAATATCATAGTCTTGTTGATAGCTACTG
AGACTAAAATTGACATGAATACGTTCATAAGATGGTCTAGTGACACCTTGGATTCCATGT
GATGGTTGGAAACGATACGAACGAACAGTATCAACGTCCACGGTAGCTGAAATAACCTCA
ACATCCTTCAAGGAGAACTGGTGTCCCTGGGCTAGCATTTTTCCATTCGCAAAGATCATT
GATGAACCGTCATAGTAGAGACGACCACCATCACAACCCCTCTGATTAGAATATAGATAA
ATCCCACCGCATTTTTCCGTAGCATTTTGTATCAAGTTTACTCTTGTTGTTAGTTTACGA
AGTTCGTGGTGGGATCCTGACGCATTGATAAATATCTCTACACCGTCCAAAGCCATATCA
ATGTGAGGACTATTTGGAGTAAACAGCTCTTCGCAGGTTTCCACACCAACAACGGTTTCA
TTGCATTGAAGAATGGCATCTCCAATAGGAACGGTTGTTTGGTTTAAAGACTTTGCAACA
AAAGTAGGCAAGTAATGAGTTTCCACAACTCTTGGCCTTAACCAGGGAGTAAACCAACGA
GACTCACGAAAATTTCCATCGTCACAAAGCCAAATCTTGGGACGGATTAACAAGATTTTT
CCATTTAGAGCTAGAATACGGCAGTTGTGACGCATGGCTTTGTGCATTACAGGCATACCG
ATGTCAAGGAGAATGTCTTGGCAATCAGGATCGTGAATAATCGAACATAACATTTCCCAA
CTATGGTAGTAAGTGTCACTTTCTAGAAAATGATCTTCACAGCCATAGCCTCTAATGCGT
TTGTTAATAGAAAGTTACAGTGCATAAAATTAATATCAAGGTAAAATACAAGTTTCAATA
TTGCAAGAAGATGAATAAACTCAACCGAAGTCGCACTCAGTAAACTTGACCATGGCTATC
CTTCATGAAGTTTAAACTTTAGCTTATTCACTGATACACTTGCAACATTTAAATCCATTT
CTATTACATACGTGACTTCTAATTCTGGACCAACACGAAGGCTTGCGTTTTGTCTTTTCG
CCTCTTTGATGGAATCAATGATGCGTAGACGGTTTCCCTCAAAGTCCATTGCCCACTGGT
TCAGCTGACTACAGAAGTTAGATCATTGAGACGAAAAATGATTATAGCATACCAAGATGC
GATGGTTACATATCGTTCCATAATGAACTGAATGCTTAACTTGAGGTTTATTCCCAAACA
AGTAATTTAACTTATAATGTTTTTTTCGTACTATAAAAGTTCCAACTATGAGTGAAGATC
GAAGTTTCTATTCAAATGTCTATTCACGGTTATGGCAGTAAGTAAGAGCAGGAGGTAGTT
GTCATAGTAGAGTCAAGTGTAAATAAAGGGTTCGCATCATATAGCAAAAATGCCAGTTTC
CCTAAGTAAGAAAAAGAAAATTTAAATAATTTTAAAGACCCTCTCTGATATTAGTAAAAA
GAACCTTAATACTTCTTATGCAAATTTTGGCGACTCTTCTAACTACATGTGTATTAATTG
TACATTACTACATAGCTTAAAAATTGATTTATAAAATCAGAATAATTGTAATTTTTATTT
GATATTGCAATACAAATTCTAGTTTTAGCGATATATCTTCTCAAGTGAAGTCATTTCTGG
GACTTCCTTTAATAAAAAAATTTGCCTATCTTTTTCAGATATACGAGCTAATAAATGAAA
TTTTTTGATTTAAAGTCTGTCTGGTTTTATTAGTGTTACTCGCTTATAATTACAGGTTTT
TTGATGATTATAGAGCAAGCTGATATCTGGAATACGCACAACAGTAATTACATTTTTTTA
ATAGTACAAAATTGTTTTAATTTTATCCTTGAAAATATTTCATGATTTAATTAATATACT
TAGTTCTTGGAGCATATAATCGAAATTACTTAGCTTAAAGAAGAAGAAGCAAAGCGACAG
ATGCCATAATGGTTGATACTCATTTTTTAACTCCCCTTCAGTTACTTCTTGTTGCAAATT
ATAGACAGATGATTCTTCAGCTGCTCAATAAATTTAATAGTTTTAGTGATTGCAAAGATC
AGTCTTCTTTTTTGAAAGGGTATTAATTAGAATTGACAAAAGATTTCAGGTTTATTATTA
CAATGAAACAACTTTCTTCATCTTCTTGGGCTTTTTTCTCCTAAATTTCGTCCAAGTACT
AAATTTTAGGTAAATTTCTATCAGTGCGCTTAAACCAACTTTAATAACTTAATTTGTACC
TATCTTCGACATGGTGATGAGAATTGCAAGTTCAAGATTTCGAGCAGAATTACCCTCTAT
AGGCCTTTTATGTTGCTAAAATTATAACATAAGTACTTTTGCACCTAATCGTATCATCAA
TCATCTTTGATGAATTTTCTTGCCTGCAAACCTCAAAAGCGATAGAAGAACAAAAGAATC
AGTTTTATCTCCAACTGCTATGTTTAGATTCTCTATTATAATGCGACGATAGATACAAAT
TTACAAGATAAATAATTTTACATTACGAATATTTGAAGCAATCTGCCTCTGTAAGCTCAA
CTGTAAACTTCATGGTTTAAGGTGAAAAAAGACATCTTTTTTTATATATCATTATGTATA
CACACAGTCTGTCCCTATGAAACTATCAATCGGGATTATTAACCATTGTTTCCGTTTCTC
GATACAGGATATTGAAAATTATCTAACAGTTTTGCTTCCTTGGGCACTAAGAGACCTTTT
ACTAAAGAAAAACCCATCAAATATTAGACCTTGTAGATTAGTAAAATTAATAAAAATAAG
CATCTCTCTTGAAACCATCTCAAGAGATAATCTGCTTCTGCTTGCGTATTATAAAGTTAC
CTTCAATCATTTCGGCGTGTAAACAAGTACCTCATATCAATAACCAAAAGCTCAACTCGT
TTGTAGTTCATAAAGAAAAAGAAAAGAAAAGGAAACCTTGTTTAAGGATTCTACAAAGAT
GTAATTTTCTGGCTTGAGATCATTTACTTTCCTAGATTTCAACTTTCTGCTGTATACCAA
CCATTTCCTAACTACCATCCAACAAAAGCACGTAATTCCCATTCCTAAAGCGAGAGCAAT
TAATGCTCAAATGAGGTTTATACATGAAATAGATATTCTCACTCTTATTCTTTAATTAAT
TATTAAATAGGGTGGTTTGTGAGTTTTTTTCAACAATATTAAGCTTTTCGTAAGCCACCT
TTCGGAACTGCCTTTACAGGCTTTAAAACTTATATTCTATGGATACAAGTTCCAATGTTT
TTCATTATCAAGTATTGTGGACGTCTGATAAAGCAAAAAAAGTAAAAGTTTGGAAAGATG
GGACAATGCGCTTCCACAGCTTCAATAATCGTGGAATTCTCTACGATTCTGATAACCGAG
TCGTAGATGATTTTTTCCTTAACAACAAGAGAATTGTTCTGGATTCTGAAATTGAATTTA
ATAGAACTATTGTTTACGTTGAGAATTTACAAACAACTACTGAAGCGAATATTCCACCTA
TACCGAGGAAATCAAAATTGAGTGAGACAGGGAAGAGGCCAGCTTATTTATTAAAACCAT
TCCAGCCTCCATTTCACTCCGCTAACTCAGATGTATCTAACAATTCAAATGGTGCTTTAT
CGTCAAATATGTTAAAAACACACGCTCATCATACAAATTCAACAAAATCCACGATCTTCC
GGAACGCAAATTTGCAATCTTATGGAGTAGATGACTCAGATATTGGTAGTTTGAGATGTT
CAAGTAAGCATCAACTGTCAGTAACACCGGAAATACAACCCAAAGCTAAGTTTAGACCAA
ACTCATATCTAGCTTCTTCTGTTGAGGAATCTAATCGAGCTAACAATACCTCTCCCTATC
CCCCATCTAACTCATCCGTAACTGCGCTACCGAAACCTTCGAAAATTGCATATATCCCTG
TTTTGTCAAAACCCAAGTCTTTTAATGGCACCTTGGTTGAAGATCCTGTAGAAGAATTTG
GAGAAGACGACATAGCTTCTGACTTTTTTTCTTCCCCTTCTGCCGATCTCGAGGCAGATG
ATTTTACCACTCTAAATAATTCAAATGCTGGTCATTTGTTACAAAACCTAAGTAATGATA
ACGTAAGTGTCTCCGTGAAGGCATTAGAAAATGGAAATGAAGAAGTTTCTAATAATCATG
CTCGATCTCCTCATTCTTCCCGCGCTTGTAATACCATACCTTCCAACAAAAACGATGGGC
TAAATGATGATCATCAAAGACAAGATTCTTCTGTTGCAGAACCCAGTCCTACTTCTAAAC
GTCTCCGTTTGACTCGCCTTCCGTTACCTCTGCTTCGGAAACCCACGGGGAAACGACAAA
ACTTTATTAATATCACAGTTACCGACCCCTCAAAAAACTTGTACGAAAGAAGTGTCAAAA
CTGCTGCCGAGCTGGCATCGCTTCAAAATGTAACAGAAACAACTGATAATGAAATACCAA
ACTCTCCTGATTTTCTAGATGCAGCATCAGAAGAGGATGAACACATTCCTTCGCTAGATT
CGTCATCTCTTTTAACACCTTTGGCTTTGCCCAACAAAAAAGCCTTTCAACCCGTGAAGT
TTCGTGTACCGTCTTTTTCATCTCCTTTAGTTAAACCAGCATCTTCGTCCTCGTTTGGTA
GGAGTCACTCTCACTTAGGCACGTCCCTTCGCTCAAACGAACTTAATGGATCTAGTGCTT
CTTCTTCAATCTTTCTACAATCCAACAATGCAGTCAATCCTAACGTTTCACCTTCTACTG
TGCTTGAACATGCCAAACATCCTTCCTTGGCCAAACATTCAGGTGTATCGCTGAGAACAG
GCTTGTTGATATATCCTAAATATGCAAATGGTTCGAAAAGAAAAGACGGTTTTGGAGCTA
CTTCTATAATATCTTCAGGGGAACATTCGTCGTTGCCTAAAAACTCGAAATCCAGAAATG
TGTCGGTATTTTCTAGCCCTTTTAATGTCCCTTCGTTTACTGTTTCTTCTTCGGACCAAG
TCCAAAAGAAAAAAGGAAATGTTCCTAATGCTATTGAAACGGACTCTTCTCCTTCGGATA
CCATTTCATCCTCGCCTACTGTTCGAGCTGTAAATCTCTCACCCAGCAAAAACCAAAAGC
CTCCGAAAATACTTACCAAAATTCCGGATATTTTTTCTAAAGCGGGAAAGAAATCTCCTA
TTTTACCAACTTTTCAAGAGTCTTGTTCGTTACCTATTGAGCCTTTTTCGTCAAACATTA
CGGATTTGCCATTTGTAAATACAGTAACACTTGCTTCAACGAGTAGCAAGATCAAAAGGG
CAAAGTTAAAAATGCTAAAATTTAAGCATGCCATGACTACACAAGGACGCGATCTCGATT
CGGACGAAGATGGTGACTTTATTTGAAATTAATTTTTCTTTCGTACGTTGAAACTTCTCT
CTCAAGCCGACTTTGTTACATATAATTTTTAATTCAAAAAACAGTACTGAATTTTGATTT
CTGGTTTCCTTCATGTATTATTATCAACATTTATTTTTCCATAGTTCATTTAGGTTTTAG
CTATACTTATTTAGCTCTTTTACATATAATTAATTTTTTTTTTTTAAACATTAGATTTCA
GCTTGTTTTTGGTGTTGTTAGTACAATTCTAGGTTTTGATTTTCATTTTTTAGTAGCACA
TACATTGCTTTTTCAAAACCTTGAGTTTCTTCTTTGAACCTTTGAGCAAATAAGTATCAG
ATTTATTCTTTTCTTTTAAAAAACCAACTATTTGGGTTATTATGAAAATGTTGTAAATAT
TTTAAGTTAAATTATCTTTTGTAGTCATTTATTTTCTATACATGTTTAAATTTTTCAGCA
CTAAATAGTGTCTGTTGGTGAGCTCCAAAAATCTTGTTAAAGATGGGTAAAAAGCGAAAA
CAGACCATAAAAAATGACTATAATGAAAAAATTACGAAAAGAAAGGTCAAAAATAATTTG
ACTGATGGAAAAGCTAGAGCGTTAACGGTTTTTGAGTCTTTACCTTTAGAAGTTTTAAGA
TTAATATTTTTGTTATCCAATAATTCGAATTTGGCAGTGACTTCTCGTAGTTTGAGACAC
CGATTATCTTTAAGGAATAATACGCCTATCTTCATGCCTATTGATTTTACTCTTTCAATG
GTACCCAAAAGCATCATTCTCTCTATTCAACGTGGATTGCTACGCAGGTATTTTACACTT
CAAATCCTTACAAAAATTGACGAATTAGTCATTTCGGGGTTTGTTAAAAAAAGCCCTAAT
GAAGATATAAAAGATGGTCGAGTTATACATGCAGGACACGAAGGTTTTATACCAAAACGT
ATTCTTTTCTTACCCAATGCAGAAGATTTCATTGCAGAGCTGGAACATCGCAACTTTTTG
TTTAAAGCTTCTTCTCTTAGAAATGGTTTTCTGCTAGCATTAAAACAACGGAACATACCA
GTTATTCGTCAAGTAGGTAAAATTGTTACTGAACGACTTATTTCTATACCTGATGATGAA
GTTGAGTTTTGTTTCCTCACCTGGTTCGAGTACACAATGGAGCAAAATTCGGTGGAACTT
TTGGATATAGTTTTTGGGTTTTGGAACAATATAATTGAAAAAAGATTTTCTAAATCTTTT
ATTGACTCTTACCTAACGAGACTTGTGGATATAGCAATTTCAAAAAATGTTACAGAGATC
ATGTACTACTTGATTGAAAAAGGTGCAATTCCTCAATTACCTAACCTTTTGAAGCTTTTT
TAAATGCTTAAGTTTGTAATCAAAATTGCTCTAGCTTTTATATCTTATTCATCATATCAT
TTGCATCTCGTTCTATAAAATAAATTTTGTATTCGAGGTATTTAATATTCATCTTCACGT
TCCTTTTTATATGCGTTGTTTCCTTTTTTCAAATAGATTCAATAAAATAACTTTTTAAAA
ACCAAAATTGTTATTTCTTTCGTTTAGTCAAAAACATACGAGATAACATTTCAATTTTGA
GAGGGAATAACATGGAATTATTTTACGCATGTGTGCATGTTATTAAGCTTTTTACATATT
TTAAAATTAGTATGTACGCACATTCATCTGAGCTCGACTCTCAAAGAATTAGCTACTCGG
TTCCTAAGCTTTTCCTGTAGCTTGTCAATTTCTTCGTTTCTAAGGGATCTTTCCATACTT
CTGTAATTGACTCGGTAGCACAAGCTCGTTTTTCCAGATTTGGCAGTATACTGATCAATC
AAGTTAACAGATTCTACCATATCTTGACAGACATCCCGTATGATCTCATAAAAATCATTT
GGATTAAAATCATTATTGATCCAAAATGCAATGTCTTTGAAACATGCTGGGTATTTACTA
AAAGGCTTAAAAGTGCTAATCTTGTTAGGCAAGAATTGCTTCGAGAATCGTTCATCCAGT
GACCAAAAAAGCCGAATATCAGGAATACCGTACAAAATCATTGCGAGACGTTCAAGACCA
ATTCCAAAAGCCCAACCAATGTAGTTATTTAATCCTGCACCTTTAAGCAGCCTATCCTGG
ACGACCCCACATCCTAATATTTCAAGCCATTTTCCTTTCCAGTCAATTTCTAACTGAAAC
GAGGGCTTGGTAAAGGGGAAACTGTCGTACGTCCAACGATACCGAACCTGTTCAGCTCCG
GAAGAAATAGAAGGAGCAAGTGATACCAGGTCATGAATCACGGTGGTCAGAGTATCCTTT
AAATGTTGGGAAACAAATTTTGTCTCTTCAAGTGAATAAATATCTTGCATGTCATTATGA
GTTTCTAATGCAGTAGTTTCATCATCCACCATTGACTTAAGAGATGGAGAAAGAGCTACT
TTTTTTAGATCATTTTTCATTTTTGCAGTATCATTTCTGTTCCACACCAATGCACCTTCC
ATTTGATGAAAAATTGGATAATGACTAGAATCCACTTCATCGCGACGGTATACATCTGCG
GTTATTAAGAAACCATTTTTCTTAAATCCTTCTTTGGCCAAGCGAGAGAACTCTTCAGGT
TGATGAGCCGAGGTATGGGTTCGAAGACAAGTTTTATTGTTCATATAGTAAGTATCGGAT
TTGCTTCTACTTACATGTGTCTTGGGAAATCCTAAAGAATCAAAATTCGTCTCTACAGAA
ACAATAGGTGATTCTTTTTGAACATTATTCATTTCGAATTTTTGAAATTGCTGTTCGAGA
AGTTGTCGTAGACTGCATATGGGATGACCTTCTTTTTGAAAAAGGTTTCGACCAATTTTT
GAGTGAATATGCTCTGGGACATTGGACCAAGAATCTGTTTGGACTTTTCTTTTCCAATTG
GGAAACCTTCTCGAAAATAGTTTCGATAAATGAGAGACTCGATGAGGGAACATTGATTTC
TTAAATAACACACTTCACTTTTTGTAATCAAACAATGATAATTTAAATTAGAACAACGAA
GCTAACTATTTTTAAAATTAATATATAATAATAATTTAATAGAATTCAATCAATCGGTCT
TAATTGCGTCCCATTTGAAAGTAAAAAAATGATAGTACCCAAATATAGGGGTTGTGCCGT
TCTTGGATACAATGAACAAAGGAGTAAAATTCGAATCGTTTAATTTTCAAGCAGTGGTTT
ATAGATTTGGTCAGTTTACAAATATTTCATTCATTGTTTTTGCATAAAAAAAATATATGC
TTTAATTTCAAAAGCCATTATCACTCAAATGGATTTCATTACGACGAATTGCAAATTTTA
TTTCCATAAGACTCCTGACATAACTTTATTTAGAAAGATAGAGCATCATACTGTACATAA
AGTTGCCAACTTCAAAAGAAGTGCAGAAAAATTATCAAGGACTTTCTTGTAATCGGTCAT
ATTAGATCAAGTATTTAATAGCTTCACTGTCCTATAAGCCGTACAATCGTAATGTAGGCT
ACAAAAAACTCAACATTTCAAATAACATTTCAAATCATCCCGATTTTAAAGAAAGCAGCA
TTCTGCGTATGAAAATTCATTCAAACCCCTAACAAGTTTGTCATCTACTAACATTTTACT
CCAAGAAAGGCTGGGGTTTAAAAATTAAATAAAACGGTTTGAAGCGTAACAGCAAAACTC
GAACTTTGTACTTAAAGTACGATACAAAACTTGACTTTAGAAAAGGAAATAGATTAGACA
ACACTAAAATCCTCCAACACGAAATTAGAAGGTCCTGAACGTAATGATACTAAGCTCATG
AAATCATGAAAAGGGAGAAACTATTAAGGTGTTCACTAAGGAGGGGAGGATAATTAAATG
ACTTGATTAGTAATGAAAGAAGGAGTTTGCTTATCCCCGATAATAAAAAATTGAGAAAAC
TACCAACATACTGGACAGACGTTGTTCTTGAGTAAAATGACAAATATCATGAAATTAAAC
CAGTCTAAAGTACAAGGTATTTTTCCATGCGTGACTGAAAAAAACTAGGATGATGGTTTC
AAAAGATTTTGAATATGATCCTTTTCTTGAGCAGACATCCAATCGGATCCTTGTTTAGAA
GATAAAATTTGAGCATACTTAAGGAACTTCTCGGGACAATTCTTAAAATAGTTACATCCA
GCAAAATGGATACACAAGTCCCCGTCGTCATAGCCCCAAATATTATCATCAAAATCATAT
GCGTTTATAGCCTTAAGTGGGACAACACCTACATGTTTATACACCTGGGGATGGTAAAAT
ACCATGTGAGAAAACGCTTGTTGCTCAGCATATCCCTGAATATGATCCAAATATAAGGGT
TCAAACCACAAATCAACAATCCAGCGGCCAACTTCGCTATTACGAATAAAAAGACTGCCA
GCGTTAATACCATTAAAATCTTGAGAGATGATGAAATGAACATCCTTAGCATCCTGATCC
TTTGGAGTTCTAAATCCATCGGCGGGGATACCTGCACCACTCTTATATTCAGCCTCCCTA
GTTAAAATGGTATTCAATCGGTCGTGCTTAAGCACATGGTCGACGACGTTAAGATCTTTG
TTCATGACCAACGCGTCATGATCAAGCCACCAAATCCATTCAGCGTCAGGATATTTCTTC
ATCGTATCTTGAAGCATAGGGACCTTAACCCAGGGCATTAAATGACCTGTAACACGAGAA
GCATAGGCATCGGCATCTAAGAATTCGAATTTGTAACCATGGCGTTCAGCATATTCACGA
CGATTTTTGATAATGGACTGAGCGAAAGGATGGAGAGGAGAGTTAGCATCATTTTGAAAG
TTAGAGCCCATCAAAATGACGATTTTAGAGTTATCCGGATGAGGATCAGTGGTAGCTAAA
GCATGAACTACAGAAGTGACAGTTGGAGTAGCAGTGAAAGTTTCGGTTAAAGTGGCAGTA
ACACTAACAACTTCACTAATGGTAACACGTAAAGTATCAGTTTGGGTACTGGTTACGGAG
GAAACGACTGGGGTCCAAGTACTCGTGTGTTGGTCGATGATCTCCTTCATCTTCGTTTGA
AGCTTGGTATCCATAGCTGAAGTCCACCAAGCTCCACCCAGGATTATGGTTGTAATTACA
ACAGCACTAATTAAATAAGGAGCGAACCGCATTGTCAAATAATCAAGAGTAAACTAATAA
TATAGAAGAGACAAAATAAAATAAAATGATAAAGGAACGGAGAATTTCCTTAGAAATGCA
AAATTAAGCAGTGAACGAAAGATAAAATTAGAGAAAGGATGGTGATGAGTGATATATGAG
AGCTTTTAAAAAGTAGAAACAGGAAGGGTAAAAGAACCGACAGTAGGAATATTAGACGAA
AATCAAAGAAGATTCTGTGCAATAAAAGAGATTGTATCCAAGAGAATGTAGAAAACCTAG
ATACGTGTGGTGAATTAAAAAGAAAAAAAACCCCCCCAAGTGAAAATATTCTCTCAACTA
AGAAATCTGTTACAATAAGTAATGGTAAGAAAATCCCTGTAGAGAACCTATATGAAAAGG
TTCAATTTGTAAATAAATAGTAACCTAACGAACGAAGGCAAAATATAGCAAAGTTTAGAA
AGAAAAAGAAGCGAAAGAAGGAAGTAAACACCAGTTTGAAGTATATAACTAGTCCAAACC
AATGAAATGAATACTTTAATACTACTTGGCAATGTAGGTGTTAAAAATCACTTGAATCTA
ATTAAATCCACGATAAAGATTACAATTCAGTACTTGTCAACGCAAAACTAAAAAGAAAGC
AAAAATCAAAAACTCAAGAAAAAGTATTGAAATTTAAAAATGCCTCTGGAAACCAAAAAA
AAGTGAGATTACCAAAAGCGAAATGAACAAAGCCCGTATAAACGAATAAATTAGCTCAGT
AAAAAATCCTTTAAAACCAGTTTTTCGTCAAGGTCTTACAATTAGAATGTTAACAAACAC
AAAACCAATTGCCTTAAGCAAAAAAAAATTGGTGGTAAGTTAAGGCCAGGTTTAAATCGG
GGGGGAATGCTAATATGTTTCTGGAGTGATGGATTAATTGTCTCCTTGTTACCTGCCAAA
CGTGTTACCTGTTATTGAAAATAAAAAAAGGGAGCTTGCTAAACAATTGTATTTATAGAA
GTCAGTGACTTGTGCATCGATGCAATCCCGAATTTCCAAAGAAAATTAGTTTCTACATTC
TTTGGTAAAATTCTGCAGTAAATTCTTGACGCTTTGGTGCGGTGATGTTAGTGTAAACAA
AGAAAAAGTCAAATGGCTGGTAAAGCCAATATTACAAAACAACATGGCAAGTGCTAGAAA
TAAAAGTAGTTTAAAGAGATATAATAGTATCATTCAGGTTTTAAAAGACATCGAAATAAT
TTTTTTTTAGTACTGCCGCTTAATGGGAAAAAATTCTATTCCAAACATGAAAGACAATAA
AACTTCTAAAAAAGATGAAAAGAGCAATAAATAAAAATAAAACAATAATAAATCTAAGTA
AAGCATAATTCGTATTTATTTAAATATTTTTGTTTCGATTGAAAATTACTGATCCAACTA
ATTTAACCCTAGAGAGCAAACTAGTAATGACTGAGCAAGATTCATTGCTTTGTTTCTATT
ACCATACTGTATATTATCGGCTTCTTTATATTATTAATTACCTTATAGCAAGTTCCTCCA
ATTATTTAGTCCCATCCCATACCATACCGATTGTTTAGGAATTTCCAATCGATCGTTTCG
CTAACTTAACTGCATGTAACTTCATTCAAATTCAAAGCCAACAAACCTTTTTCGATGTTT
AATGGAACATAGGATCTTTTACCATAAAACTCAATGTTTTCCCCTTTAGTTACACTGCTT
TACTTCTTTATTTTTGTAAACGGACAAAAATAAATTTGTCCCCTTTACAACTATCGGACC
GGGTGGAAAAGAAAAAAAAGGGTTCCGCAAATCCTAAACTTTCAAATAAGGATTATACAG
AAAGGAACTATTTCCTCCGAACATTGCAGAAAAGAGTCAATTTGTCTACTTCCATTTAAA
ATTTTTTTGCAATGCTCACTCAGCTTTCCAAAGCTTCTTTAACGTGCTAATTATGAGAGT
GTGTAATGAAAAATCAAAGACCATCTAGGTTATCGTTAAAGATAATAAGAAACCGAGTTA
TGGTTGCTGTAAAAAGATATCGCTCTGGCATGCGATGGTTAGTAAATAATACTGGAATCA
CCGCAATCAAAAGTTTTGCTGCAAAAAAACGAACTGAAGAAACTCCCTTTAAATATTACA
TTTAAAGAGTTGCTTAAATGTATTGCATCTACAATAAGACTGGTACCGTCCTTGGATAAA
CAGGTCTACCTATTTATCCGCTTGGTATACTACAGAGATAGCAAATTGAATAACTGGCAT
GTCATCAGACAGAGAGAGTTTGTATCAAGCTATATTACAATGGTTTGTTTATCTTTACTA
TTTTAAAAACTACATTCATTTCTTGTTAAAGATTGACACAAATATTAACGCATTTTCTTC
CTTTGCTTTAATTTACTCAACACGTTGTTTTAGAACATGGTTCTTATAAGCGTTACTGAT
GTAGTGCTGGGATGCGTAATGTGGTTCAGCATAAAAATGAAGGTGGTCATTATGTCGCAA
CTGTGCGCATATGACACTTAATTGATGAATGTGGAACAGAAATGAAATCCTGTAAAAATG
ACAAAACGAATGTGTCAGACGAATTGAGCTAATTCAGAAAAAGCCTTATTTTCCTTTTAC
TTTCTACTTTGCTTTCAATATAAAGAAGAAGCTGGTTGAACGTTTAATTCATACTAGCTG
GGAAGTTAATATTCTTGTTTACGTTGTTTTGCTTCAACAATTTTGATTCTTGCAATTCTG
TGATCTAATCTTATATTTTTCGTCCAAATGCTAAAAATGAGTGGTTCTTATGCTCCCATT
GAGGATTCTGCAGATGAATTGAGTGTGCACTCAGGAAATGATAATGAAATTGATTTGGAG
AAAGGTCTCCTTCCTAAATGTAATACGGGCAATGGAGGAACAACCCCTTGTTCAGGTAAG
TATTGTAGTTAATAAGGAAAGATGATAATTTCAAAAAAAAAAGAAGTGATTTTGTTTTAC
TACAAACAGTACGCTCCCCATCATTTCGCTGATGTGTACTTTTATATTAGTCGATTCACC
TAAAATGTGTAAAACATACATACCTTATTTTTTACTATTTCACTTATGAACTGCATGATT
CTAATATTTTTTTTCTTTTTCAGAACCTCCACATTATGATTCCGACGCTGTGGTCGAAAT
GGATATGTATGAAAATAATATATACATGCGGACTTTTAAACTAAGACCTTTTGCTAAGAG
CGGAGTAACTAATTCTTCCAATGTTGTGTTCCAAATGAAAACATATGAAAATAATAGACA
CATGCAGACTTTTAGACTAAGACCTTTTGCTAAGAACGGAGTAACTAATGGAGTAAAGCT
TGCACAATCATTATTTCTGCTGTTACCGTTTAATTTTATTTTCTTCGCTTGTTTATTTTT
TAGGAAAGCTTCATTCACTGACTTCTCTCTCATGGGGTGGATTTTGTTTGGAATATGGTG
TTTAACTTGCTTTCTTTCATCTTTCATTTTGTATGGTAAGTGAGGCATGAGCTTGCCAAT
ACGTTCATTTCCCGTTAACTTAATAGCATATCATGAAAGTTGGACGAAGTTCGCCCGAGA
GCGATCGCAAGAGTTCTCGCTAATTCTTTTTGGGTTGCTTTTTCCAGGAATTGTCACCAT
GGTCGTTTTTTATGCACTATATATGCGTAGTATGTATGGCTAGTTAAAAAATAAACTCCT
TGACTGTGAGTAGGAGAAGTTTTTTTGTCACTGGACAAGTAAAAATTACCATATGCCTCG
ATGAGTGTGAAAGGTCTTGTTCGAAATACATGTAAACAACACTACGCAAAAGAGCTTACG
ATTGATGTTGATTATGGGAGAGCTCTGCACTTGTTATTTTCTTTTGAAAACGGCATGAAC
AATAATTTTCTGGAGCCAAAGAAAACAGAAATTTTGTACAACATTTGATCTTCTCTTATA
TTTCGAGTTTCCTTATTTCCTCACATAAATGGTTTATCGTAGTTTTTACAGTTTGTACAA
AATTATAAGGAAAACTTATAGGTATCTACTGAACTGGTGGTTAATTGCTTCAAGTACTAA
ATTACGGTTGGCTGTTGTTTCAGGGAAAGATGTTTTGCTCACAGAGATTGAATAGTTGGT
AAATAGGATGGCTCTTAAGCAGTGTCAAAGCTTAGGGAGAAATCAAACTAGAAAAAGAAC
ATCCTACCTGTTCAATATTTTTCAAAAGCTTGTAATGTTAAAGAAGTTACAACTCTTTAG
ACATACAATTTGCTCAATGGCATTTCGCGCTTCTACTTTCTCTAAAAAATACTTCGACAA
TTCTAAAATATTTAGATTTTTACCAACGATTTTATTTAGAAATGAAATTTGATTATTATA
AAATGCTGAATAATTGTTGCAGCCGATATTCGTCATGATTTTGTGGAACAACCAAAATTA
CTGAGCTTATTAGTTAAATTAAGTTCGATACTATTTTTTCTTTTCAGCATTATCTTCGAT
TCTTGATGAGAAAATCTTTGACCCTATGCTTCTTCCATCTTACTTTGCAAACTTCCAATT
TTTTATTGTTTACAAAATAGTGTTGCATAAGGAGGAAACTATAGTGACAATTGTGATAAT
TAGCAGTTTATCGCTACCCATGTGAATTGACTAACGCGATCTTCCCTCTTATCTTCCATG
TATTGTTTACACTGTCAAAGCATTTAAGCTGAACTATAGTTTTTGTTGGATCATATGCCT
GATTTTATTTAATTTGAATCTTAAGGGCGTAAAGGGAAGGTTTGATTCTTTTTTGGTCTA
AGCAAATTCGATGCTTAATTTTCTCAAATAACAATTGCATACTTTGATCTTATTTTAGGT
TTCTACGTTTCTTCTTCTCTCTATTAAAATTATTAATCAATTGAGATATACATAAATTTT
CCTAACGGTAGTTTTTGTTACCCTCGCTAATATTTGGTCTTTTAATAATAAACAGTTTAT
CTTGCTTTCTCACCATTAAACATTAATTTGATATGATATATACCGTGGGTATTTTCTAAT
TTGATTCATATCCTTTTATTCACAACCAGTCGCTGTTCTCCCTATTCTTACCTCCTCTAT
CAATATTAATATACCCACTTTTTAATTTTTTAAGATTTCTTTCTGACCTTTTCTTCTTTT
CACTCTCTTTCTTTTCTTCTACTATCCTCGCTGCTTGCGCCGTTTTTCACTATGGTACTT
TCTAGGCTACCTGCTTGTTTACTCCCTTTGGTAGGGACCAAAGTGAGTATTCAGGGCTGG
CTCGTAGCAACTAGCCGGCAAGTTTCCAAGAGCATTAGCTTTCATCAACTTCGTGACACT
CATGGTACCATTCTTCAATTACTTTCCACAGACAAAATAATCCTCCAACAGAAAAGAGAA
CCGCTGGTTTCCTCTACCGACTTTTCACAACAAAAATCTACTTCTGTTATGCGTACTTTA
TCTTCCATTCCGCCCGAAAGCGTTGTTCAAGTTACGGGTAAACTTCAGCGTCGACCAGAG
CATGATCGTCGTCCCGGTAATGAATTTGAACTTCACGTTGAAGATGTGAAATTACTAAAC
GTTGCTAAAAATTTACAGTTATTTCCCGGTGATGAAAAACCGGGAATGCGGATACAGTTA
GCAAATCGACATATTCAGTTACGAGCCCCCAAATATAATTCATATTTACGACAACGATCA
AGGTTGGCTTATCAAGTACACTCTTTTTTTAATGATAGAGAATTTTGTGAAGTTGAAACA
CCTTTATTGTTTAAATCAACTCCTGAAGGGGCGCGCGAATTTGTTGTCCCTTCAAGATTA
AATCCTGGCAAATTCTACGCCTTACCACAAAGTCCGCAACAATATAAGCAAATTCTAATG
GCAAGCGGAATCGGGAACTATTATCAGATAGCTCGTTGTTTTCGTGATGAAGATCTTCGT
TTCGATAGGCAACCCGAGTTTACTCAGATTGACCTTGAAATGAGTTTCGTTGATAAACCT
CACGAAATAATGGAGGTAGTTGAAGATTTGCTTGTCCGATTGGTAAGTTTTGCTAAAGGA
ATAACTCTAGCAAAACCATTTCAACATATAACTTATCAGCATGCTATTGACAAATATGGC
TCCGATAAACCAGATATTCGATTTGAATTACCCTTGAAAAATATAACTTCTTTGCTTCCT
AAACAAGATCCCTTAATTAGTACTGAAATCCTTGTTTACAATGATTTATCACACTCTTTG
AGTAATGCAGAAAGCCGAAAATTATGTGAAGCTGTAGGTGAAAATGTTGTTGTCACATCA
ATTCGGGAGCATTCTCAATTACAAACTTGGGTAAAAAAACTGCCACAACTTCGCCAACTT
CCTATTGTAGCCGAGGAGCTTAATCAAAAACTTCAAATTGGTATCAACAGTATTGTTTTT
ATGACAAACAGACCAAAATATTTGGTTTCTGGGACAACACCTTTGGGGAAACTGCGACTT
TTGCTTCATGAACTGCTGGTTAAAAAGAAAGCTTTACCAGAGCTGGACAAGGATTTATTA
AAATTCGTTTGGGTCGTGGATTTTCCTCTTTTCTCACCAACCGAAGAGAAAAATCAATCT
ATTACATCTACACATCACCCATTTACTGCTCCTCATTGGGATGATGTACATTTACTGGAA
AAAAAGCCTCTTTCTGTTCGTGGACTTCATTATGATATAGTCGTGAATGGTATTGAATTA
GGGGGTGGCAGTATTCGCATACACAATCCAGATATTCAAAGATTTGTGCTTAAAGACGTG
CTTAAATTACCAGAGAATAGGTATGCTACATTTGAGCATTTAATACGCGTATTGTCTAGT
GGCTGTCCACCGCATGGTGGAATTGCATTGGGTTTTGACAGGCTGGCTGCGCTGTTGACG
AATGCTCCAGGAATTCGCGAGGTCATTGCTTTTCCGAAAACCTCTTCGGGTGCTGATCTT
TTAATTGGCAGCCCGTCTGCTATTCCAGAAGAGATGTTGAAAGACTACAACGTTGCTATT
ACGCGACAAACTCAAAACCGTAATTAGATAACTTAAGCAAAAACATTAATCATTTAATTT
TTTTTATACAAAATTTTAATCTAATGCTCATAAATGGGAACACGACCACGCAACCTCGCG
GTCATAAATCGGCTCATTTTAGGTTTTTCATTTCCATTCTCATCCAAAGGTATAACTGCC
TGTTCTTCTTCATCCTTAATATATTCACCTGTATTATCTATCATTTTTTTTCTCAGTTCG
TAGTAACGTTGTGATATAGCTCGTTGATCACTAATTTCCTCGACTTTCGCATCGAATGCT
TCTTTAGACTCGCTAATTTTGTCAGATGGAGTTCGTTCAACTACAAAATCTTTTACTACA
GATGGTTCATTTAAATATTCCTTGGAAGTTTCCGAGCTTTTTTCTTTAGGCGGTGCTTTA
AGCTCGGATTCTACAGTAGATTTGTCTTCTTCTTTTGGATTTAACTTTGTATTCGCAGCC
CGATTATTTAATGTGTTACTCAAATCATCGTTCTTGATTGTACATGTGGCATTAGAATGG
TTGCCCTCTTCGTTTTCCTTTGCGCGCAATTTGCTCCTTGCTTTACGAAACGCTGAAATA
CGACTCTGAAAATCGTCTGGTCCAAAAAGATTATCGTATTCTTCAGTTGGAGCAGGTATA
ACTTCAATATTCGCCTTTCCACTCCGACTGACGTGTTTAATTTCCAGCGTGTCTGAAAAA
TGTACCTTTCGAGGATTTTTTGACGAAAGCTCTTCTTGTTCAACGATTTGTGGAAAGTCA
CTGACATTTAGGCTCTCGTCATTACCATTGACATAAGTTGTAGCACCAGTCTTTTCTGTA
AAATATTGAGGATCCGGTGGAGCTTTCAGTTCCTTGGAAAATCCTATCGTCATACCATGT
TCATCTTCCTCAGACTCAGAATTATCATCTAATTCGCCTTCCTCCTCCATTTCCTGAATG
AGAGCCTCCATATCTTCTAAAGAGTCTAAACCGTCGTATTGTACTGCTTCCAAAACATTT
TGTCCTTGCGCAGTCGTCGGAACTGGTAGTAACATCGGTTCTTCTTCGACAATTTTATTG
TCGGCATTATCTGGTTCTTCTATACTACTACTTCTAGTTTCGTTTATAGAATGAATAGAT
TCATTTCCTAGTGAAAGCTTTTCACTAGATGTAGCATGATCTTTGTTGCCAGATTTTTTT
GTTTCTAGCTTAGCTTGTTTAAATTTTGAAAGACGCTTAGGTCGTTTTTTATGTTTAGAC
GTGCTAGTGTTATTATCTTTATTAGATTCCCCAGTATCTTGGGCCTTCGCTGTCGGATGC
TCTAACACAATGTCTCGTAAAACTTCATTTTGGGTATCTTGATGTCCATTTTCATTTAAA
GTAGAGTTATTGAGAGCATTCAATATCGTTTCTTTATTTTTTTCAATAGCAGAAGCGTTT
GACTTTATATTTGAAGTAGTTCTGTTTTGCATTGCATTATTTTTTTTGAAAAGAAAACCC
TTTTTAAACAAAGAAGTCTTGCTACCATTTTTAATTTGTTGAACCATATCTGAATCACTC
AATGAAGCAGCCTGACTATTACTAATAGGACTCTCATATGTTTTACTGTCTGAATGATCA
CCATGTTTGCTGGGAAATTCTGAGACACCAAGTGTTGGAGTTGAAGTAAATTCAGTATTA
GAAGGTAATGAGCCCATTTCTGGAGCTTTGTAGTTAATATTTTTCGTAGAATCGTTAATT
TCTTCTTCAGATAGCTCTTCAATTCTCGAAGATGTATCACGGTTCCCCCCATTTTCAATA
TTTTTGAAACCAGGAAGGGATCGAAAGACATCCGCATAATCTATTACAGATGAAATTCTT
TGTGGAGCAACAGAAGCACTTATAATATTTCCATCTTTATCAACTTCTTCATGAATATCC
ATAACAGGTAACCCTTCTGAGTTTCTTACTATCAACTCGGATTTCTTCTTTTCAATTGAA
GATGCTAAGTCATTATTGTAATTTCCCAAAAGTAAATGAATATGATTTAAGACTGGATTT
TCATTAGCAATTAGTCGTTTGATGAAGCAAACATTATCACTCAATTTATAAGAAAAAGTA
ACGTACAATCCACATGGGATGCTGTTTCACATCCTTCAACTTTTCCATCTTCCTTACAGT
AACGGATCGCCCTACCGACTGATTCAGAAATTTCGCTAATCTTAGAGAAGATTTGCTGTT
CAAAATTGATGGCTACTAGTCTTTCGTCGTTCATTCGATAAGTTGTTTTAAAGGATCTTA
AATAGAGTTATTGAAGAATTTCTAATTCAAAATAATCTCACGCCAACGATCGTTTCGTGG
TTATTCCGGAAAAAGGCATATACAGCTTATTCGGGCAAGCTAATATTCACTTTAAAAACG
AGATAATAAGTAATTCTAATAAATTTTAAATACTTTTAGTATTTAAATAACAGGGTAACT
AATATAATATCGAAAAATCGATGTTAATGGAAATGGCTCAAACTGAGTAGGAAGCCACCG
ACCTGACCCTAATGTACGTAGAAAGCGCCATACTGCAAATGTCCTAAGCATCTAGTAATT
TGGTCCCTTACTTTAAATTTTAATATTTTCTCACTGAAAATAATTTAAGTAAAAGCAAAT
GCATGTCTTAATCCTATAGGTCCAACAGTTTAAGCAAGTATAAAACATAATTTGAACATT
AATGGGGGACTATTTTGCCTGGGATTTTGCAAATATCTCTGGGAGTAATACTTCTGGCTC
CTTAAATTTAAATCAGTTGAACTGTAAGCGCTAGCAATGATGGTTGAGTTATAAATCATT
CTGAACATCCCAAGCGTAAAATAGCTAACGGATTTTTCTAGTGGACAACATAAATAATGG
TTTGCATAATCAGGAGGATGGAGCTGGAGGAAGGAATGAAAATTCTGAAAGAGTTGGAAG
CGGGAGTCCTGGAAGTGTTTCCATGCAGGTTTTGTCTCTCTTCAGTGCTGTAAACTCAGC
TTTGGCTACTTTGGAAAAATCAGAGGAATTCCCTTCTGTAGTTAAGGATGAACAGTCAAT
TTTTCCTGCTGTAGCAAAGGCGTCTAATTCGTTGGACGAGCTGGCCCAAAACATAATTCC
TGCTCCTTCTCCTCCTGGGTTTAATAGAAAAAGAAAAACCTTTGATGAAGACAGTTCTGT
AGAGATGATCCGAAGAGCCATATCAGATCATTTGGATTTACTGAACAATTGTTGTATTGG
CATTGCTAATTTGAATGAGGACAGTGTGCACAAAATTTCACTTACACGTTCAGGGAAACC
TAGTCAGCTGGTAACAGTTTCGTGTCGACATTCCTCTGTCATACAAAAGTCTTATGGGTC
AGAGAAACGTTACCTATGTCCACCCCCTATGGTTTATATTAATGGGAATTACTCTTCTAT
ATTCAATCAGTCTTTTCGCACTGAGATATCAATAATGAATGATTTTGGGCAATGTTCGCA
ACCCATCAGCGAAGAATACACTGGCCAAGGATGTATGATTTTTCGGTCACTGCATATATC
GAGTTTGGTCGCTGCGAAATCTAAAAACTTACGGCTTTCTCTGGACATGTTCTCGAATGT
AAATAACCAATTGTTATCTCATTTGGTTACTTCTTCTATTAGTATTGTCTCCAAACCTTC
GAAAAAAGGAAGCAAACTAAAAATTAGTAATATTACGTTGCGATCCGGTTCAGTCGTCAG
CCTTTATAACCGGATTAATTCACAAACTGTACGTACAAAGTATACATCGATTGAGGCTGG
TCAGTTTTGTCTTCGCGGTGATAGATGGGTGCCATTGCGTATTAACCTGCTATTACCAGA
TGAAAATGGTAAACTGAAGGTATGCGACGATGTCGATAACCCAGAACCCATTAAATATGG
CTCCATCGTTGAATTGGTCGATGAAGCAACAGGAACGACGAGTGACCCTTTAATTATTCG
ACGAGTAGAAAAAGACCACATTGCTGAGGAGGACGGTTACGTTAATCAAATGCATAGAAT
TGTATTAGAAAGCGCATATCCCATATCAAACGTACGGCATCTTAAGATCGCTGAGCATAG
TTCACTGGCATATTCCAATAATATTTCAGTCCGTTGGTTTCTTGGGGCCACGTCGGCACA
AAACAGAAATGCATCTAGTGAGGCTATATTGCCCATAGAATGGGAAGCTGTTGGAAACTT
GAGTTCAAATGAAATGACTCGAGTTGGAGATTCTGTATGCTGGACTATAGTGGGCATATC
ACATTTTGACTGTACGATGATGTTACCATTCAATCAAAATCCTGTACCAACGGTTACTGA
TTATCCATATATTGAAGAGCCACCCGAATATTTGGAGAGCTCGCGCTCATTACAATTTAA
AATTGGAGGCTATTCGGTCGGATTACAAATTTGGCTAGGTGTTCATGGACCATTGTCGTA
TAGTTTTACCGCAGCTGCTGATACGAGTACAATGGGTACGGTCACTCTAGGTCTGTCGCA
AATTTCATATGATCCTTCTTGTGCAGAACAAAAGTATCCTTTGTTGTTCGTGATTCCAGG
TGGGATTGTCATTATTGGAAAATGCGAGATTTTGCTAACGTCAAGTGCTTTTGGAAACTG
ATGCATCATGATTAATTTTACGTGTGGTTTCATATGGCGAAATATTGAAATACAATTTGT
TTTCAAAATGATGGAATTAGGTTGAAATCTCTCTTATTAAATGAACTTTATATTGTACAA
ACATCCTAGCTTATGGAAACTCTAACATATAGAAAGCAGCGGAAGCTTTTGATAAGATAA
TTGAATCGTCGAAAATATGTACTTAATAATTATGATTTTCAAAAGCTGCAAAACAGAAAA
ACTTTTAATAAACTAGTAAGGTGTCTGTCGAGAGCTGTCGATCATATATTATGTGGACCG
TAATCGTTTCTCCTCGGGAGGAGTTGCTGTATCCACTTCCAAATTTAAATATCTTTTATC
TGCTTCTCTTAAAATTTTACTATAGCAAATTCCTTCAACTTTTGAAATGCTGTTCTCCAT
TACTGATAATTTCTGCTGTAATTCTGACTTGACCTTAGATGGTAAGTGTTCAATTTCTGA
GCAGTTTTTGTGTAGTCCACGAAGAAATTTAACTTGCTGAGTGAGTTGTTGGACAGAGAA
CTTAGAGCCGTTGGTTACAAGGAATCTCATTATTTCACCAGTCATGTCACAAACACCGAG
TACATAGTCGATGAAATTAATAGAAATTCTAAAGCTACTATCTTTACAAGAAAGTAACGT
ACCTGTTTGTAACCAGAATTTGAAAGTGACAGCTTCAACATACTCTTGAAGGCCGTGTGT
ACAAGCAGAAGAGAACTTGTCTGCATTTAATCCAGCCAACTCTCTCTTCAGACTTTCTAG
TTCTTTGTGAATTTTTTTTTCAAAAATGGATGTTCTGTCGAAATCCTTGGGTAGAGGAAA
TCCATCAGAAGAGGATGTTTGATGTAAAAGAAAGATCATTCGTTTACTTTGAATTGTGAT
TTCACGAGAAAGACGAATAATTTTCTCCCTCTTATCTTGATCCTCCTGTAAAAAATTTTT
AAATGAGAGGAATTCCTCTTCCATATTTGGCAAATTCGGTTAAAGTTTTATAATATCCTC
AATTCAGCAAAGCCGTGTGGAAGGTATAAATGTATAAGTCTATATTATCAATTGAATTAA
ATGCAAATCAAGATGACTATTTGTTGTTTAAGAGACGAAATATTGTTTAGTGGATCATTG
AGTAAGGTTAGTTGGCTCTGTGCTATGAAATTGAAATAGTGATTTGAGCTGCAGCAGGAC
AATCGACCATGTATGGAATGAAGAGAAAATATTGTTAATAAAGATCGGTTAATAGGAATA
ATGAATTTTTTTGGTTATTTAAATTTACTGTGGACTAAAGCCATTTGCTTCTGACAATAA
AATCTTGAACATGTGAAAATAATAAATATATAAAGAAAGAAATTTGAGCTTTGCTTGAAC
AATTCTGAAAATAACTACCCAAGTTTTTTGTCATTTCCACGTGTTATTTAGTTATATTTC
TTAAAAAGAGTCCCGTCCTTTTTATATTTACAACATCATTAGTATTTAAAATAAATCTTA
GCCTACTTAAAATCCAAGGCGCAAATGATTGTTTATCACAGCATAAATTCTTGCAATTAA
CGAAAGAGTGTACATTCATCAATCAATCATTTTACTAAATAACAATGCCGATGAAAACAG
ACTCAATACTGCTTAATTACTCAAATACATTACCAGGATTGCCCAGTTAAAGAGTATGTA
GAGAAAGATATTATTCCTACTCAGCGTTGGCACAAAATTCATTGTGTTAAATGCTTTATT
TACAAAGCTGTAATTGCTGATAAAAAGTGTCACAAACCGGGATCGAACCGATGACCAACA
GATCTTCAGTCTGTCATGCTCCCAACTACACCATTGCGACTAGTTGTTATCCATAGTCAT
TATAGATCTAAATAAATTGTATTCTTAATAATGGTTTTATAATATATTTTTCAAATGCAG
TATTGACAAATACATATCCTTGTCATTCACAGATTATACATTTGTAAATACTTCCTATGT
ACTTAATCAACCTTATTTAATTTACACAATGCTTTAGAAGTCGCATACAATCTCCATCGA
TTATATATTTTATAAAACGATTTTCCTTATGTATTTTAAACATGTTTATCATTACATTAC
TAGAGTAACACAAATATTTTTTCTATTCCAAAAAAGCTTCTGCGGGTATAATTTTAAGCA
TATGGAATATTGTGAGTTGACAAAAGGAGACGGGATAAATTCAGGTGTAAAAAAACATTT
ATTCGTAAATCACAAGTCGAATAATAGTAAAACAAAAGGATTTATGTTTTGGCGGAATGG
GAATTAAGACTATGTTTTTTAATGAATGGGATGTGTAAATATGCAGTATCTCAATTCACA
AACTATTATGAAAGGAGTGGGAGATTTAAAAGGAATTCTGCCATTGATCCTTAGCTGAAG
AGAAGGAAAACTTAAACATATTAGTTTAAATCTAACCAGCCTGTTAGATATTGCTTCAAT
TTTCAAAACAAATGAGTAATGTTTATTCTCTTATTAACATAGAGAAAGGAGACAATGTAT
CCGGAAAGAAGTTGTACGTAATAATAACTTTTTCCATCGAAGCCTCATTTAACTCGACAT
ATAACGTTTCCTCCCAAATTATTCTTAATTGCATCGTCAATACTCATTATACCATGTTTA
GTTTCTACAATTCCAACTTCTGCAGGCTCCAACCCATTCACAAAGCTAACTTTCCTTCCT
TTGGCAAATTGCAACAACTCAGAAGGAGTCAAGTTCACCTTTCTACTAGGCTTTGATACT
GCACGTATGTAGTGAAGAACCGGTTTTCCCTCAAAGTACTTTAAACCCAACCATAGACGG
CGGGTCGCTACATTTTGCCTAGTGGTGATTGTGGGTAAAGCATCGGGTCCATGAATATCT
CCGCGTTGAATCGAGCTTAAAAATCCTTGATGATACAAAACAGCACATAACTCGAGCACA
CTGTTACAGTTAGGAACGCTTGCTAACGACTTGCGAGCGCGAAATGAATTTTGCAAATGC
GAAAAAACATAATGCAATTGCATTTCGACTTTTTTAACACAATCCTAATCTTTTATAAGC
AGTCCAACAATAAAAGCCTTTTTTTTCTATACAGAATGGTGTTTTGAGGAAAGAAAAGAG
GTATGAATGCAGTTTAGCTAGTCACTTCCAAATACCTCTCTCTGTACTGGAAGAATAGTA
AGTAGTGAACGGTGTAGCTAGTGTTACACACTATTAGCAAGTTAATGGACATTGCAGTAA
TCACTGGATAGTAGTATATTAACGACACGATACTAAAGTTCACAATAAATCACTATATAA
TAAACTAAAAGCACCGGTTTACTATGTTTGGAAAACAAGGCGCAAAATTGCAAAACCAAC
GGTTATTACGGCAAAAGCCGTCTACCAAATGTTAGAGATTTACTTTGTACAGAATAAAAT
ATGGATCTAAATCGCTGTGTCAATCTGTTAATATTATAGCATTCAAATTACCATGAAACC
CACAAAGTTGTCAGAAGTGGGAAGCGAATTTTTGTGCGTTTAGTAGTTCCAAAATCCTCG
AAAGGTATTCGCAAATGTAATAATCGAAAAAATTATAATAAGCAGTGTTCAAAAAAACAA
GCGGTACAACAGCGAACGCCTGTAAAATATAGGGATGTAAAAAAGCATTTGAATACAATG
TAAATTCACAATTGTATAGGATTATAAAAATTTTTTATAAAATAATGGCATAACGAATTC
TTTACTGATATTTTAATTACAGAAAAGAAAACGTGAATTGAAAACAAAAGCCTAACAGTA
TGGAGAACGATTTATAATGCTTCTTTATGTGGCCGATCGTCCAGAAATTACTGATTTACT
CAGTATAATATATTGATTTAATTAAGTTTCGCTTCTTAAAAAGGTTGTTAGTTTCGGTAA
GCTGTTTAACGAGTATTACACAAAGCACAAGGCATTTTAATTTCATAAAAAAATGTCCGT
TTTAATTTGAAAGACGTTCGAAATCAACACTTTTCAAAAATCAGTGCAATTACCGAAATC
ATTTACTTGAAAGTTGCCAGATTAATATTCTCAAAAGCAGGTTGTAAAAATGTATTATAA
CTATAAAGAGGATTTCAAGCAAGCAAATATAACAAGAAAAAGAAAACAAGTAGTAATCAT
TGATTTTGAACCTCCCGGTATTGTTAATATAGAACTAGTAAACAAATAGTAATTCAATGT
[truncated: 12,442,238 more chars]
