# Supplementary material for: Workflow for Genome-Wide Determination of Pre-mRNA Splicing Efficiency from Yeast RNA-seq Data
Source: Biomed Res Int. 2016 Dec 6;2016:4783841. doi: 10.1155/2016/4783841 (PMC5168555; doi:10.1155/2016/4783841)
Supplement: Supplementary file 1 — The Supplementary Material contains a table of PCR primers used in this study, and all scripts required to run the analyses of splicing efficiency presented in Figures 2 and 3. The scripts are commented and can be easily adapted for other RNA-seq datasets. An adaptation of the workflow for processing RNA-seq data from the fission yeast Schizosaccharomyces pombe is also included. [file 4783841.f1.zip › pombe_E-GEOD-47573_cwf10/genome/Schizosaccharomyces_pombe.ASM294v2.31.gtf]

#!genome-build ASM294v2
#!genome-version ASM294v2
#!genome-date 2009-05
#!genome-build-accession GCA_000002945.2
#!genebuild-last-updated 2015-11
I	PomBase	gene	1	5662	.	-	.	gene_id "SPAC212.11"; gene_name "tlh1"; gene_source "PomBase"; gene_biotype "protein_coding";
I	PomBase	transcript	1	5662	.	-	.	gene_id "SPAC212.11"; transcript_id "SPAC212.11.1"; gene_name "tlh1"; gene_source "PomBase"; gene_biotype "protein_coding"; transcript_name "tlh1"; transcript_source "PomBase"; transcript_biotype "protein_coding";
I	PomBase	exon	1	5662	.	-	.	gene_id "SPAC212.11"; transcript_id "SPAC212.11.1"; exon_number "1"; gene_name "tlh1"; gene_source "PomBase"; gene_biotype "protein_coding"; transcript_name "tlh1"; transcript_source "PomBase"; transcript_biotype "protein_coding"; exon_id "SPAC212.11.1:exon:1";
I	PomBase	CDS	1	5662	.	-	0	gene_id "SPAC212.11"; transcript_id "SPAC212.11.1"; exon_number "1"; gene_name "tlh1"; gene_source "PomBase"; gene_biotype "protein_coding"; transcript_name "tlh1"; transcript_source "PomBase"; transcript_biotype "protein_coding"; protein_id "SPAC212.11.1:pep";
I	PomBase	start_codon	5660	5662	.	-	0	gene_id "SPAC212.11"; transcript_id "SPAC212.11.1"; exon_number "1"; gene_name "tlh1"; gene_source "PomBase"; gene_biotype "protein_coding"; transcript_name "tlh1"; transcript_source "PomBase"; transcript_biotype "protein_coding";
I	PomBase	gene	5726	6331	.	-	.	gene_id "SPAC212.10"; gene_name "SPAC212.10"; gene_source "PomBase"; gene_biotype "pseudogene";
I	PomBase	transcript	5726	6331	.	-	.	gene_id "SPAC212.10"; transcript_id "SPAC212.10.1"; gene_name "SPAC212.10"; gene_source "PomBase"; gene_biotype "pseudogene"; transcript_name "SPAC212.10.1"; transcript_source "PomBase"; transcript_biotype "pseudogene";
I	PomBase	exon	5726	6331	.	-	.	gene_id "SPAC212.10"; transcript_id "SPAC212.10.1"; exon_number "1"; gene_name "SPAC212.10"; gene_source "PomBase"; gene_biotype "pseudogene"; transcript_name "SPAC212.10.1"; transcript_source "PomBase"; transcript_biotype "pseudogene"; exon_id "SPAC212.10.1:pseudogenic_exon:1";
I	PomBase	gene	7619	9274	.	+	.	gene_id "SPAC212.09c"; gene_name "SPAC212.09c"; gene_source "PomBase"; gene_biotype "pseudogene";
I	PomBase	transcript	7619	9274	.	+	.	gene_id "SPAC212.09c"; transcript_id "SPAC212.09c.1"; gene_name "SPAC212.09c"; gene_source "PomBase"; gene_biotype "pseudogene"; transcript_name "SPAC212.09c.1"; transcript_source "PomBase"; transcript_biotype "pseudogene";
I	PomBase	exon	7619	9274	.	+	.	gene_id "SPAC212.09c"; transcript_id "SPAC212.09c.1"; exon_number "1"; gene_name "SPAC212.09c"; gene_source "PomBase"; gene_biotype "pseudogene"; transcript_name "SPAC212.09c.1"; transcript_source "PomBase"; transcript_biotype "pseudogene"; exon_id "SPAC212.09c.1:pseudogenic_exon:1";
I	PomBase	gene	11027	11556	.	-	.	gene_id "SPNCRNA.70"; gene_name "SPNCRNA.70"; gene_source "PomBase"; gene_biotype "ncRNA";
I	PomBase	transcript	11027	11556	.	-	.	gene_id "SPNCRNA.70"; transcript_id "SPNCRNA.70.1"; gene_name "SPNCRNA.70"; gene_source "PomBase"; gene_biotype "ncRNA"; transcript_name "SPNCRNA.70.1"; transcript_source "PomBase"; transcript_biotype "ncRNA";
I	PomBase	exon	11027	11556	.	-	.	gene_id "SPNCRNA.70"; transcript_id "SPNCRNA.70.1"; exon_number "1"; gene_name "SPNCRNA.70"; gene_source "PomBase"; gene_biotype "ncRNA"; transcript_name "SPNCRNA.70.1"; transcript_source "PomBase"; transcript_biotype "ncRNA"; exon_id "SPNCRNA.70.1:exon:1";
I	PomBase	gene	11784	12994	.	+	.	gene_id "SPAC212.08c"; gene_name "SPAC212.08c"; gene_source "PomBase"; gene_biotype "protein_coding";
I	PomBase	transcript	11784	12994	.	+	.	gene_id "SPAC212.08c"; transcript_id "SPAC212.08c.1"; gene_name "SPAC212.08c"; gene_source "PomBase"; gene_biotype "protein_coding"; transcript_name "SPAC212.08c.1"; transcript_source "PomBase"; transcript_biotype "protein_coding";
I	PomBase	exon	11784	12994	.	+	.	gene_id "SPAC212.08c"; transcript_id "SPAC212.08c.1"; exon_number "1"; gene_name "SPAC212.08c"; gene_source "PomBase"; gene_biotype "protein_coding"; transcript_name "SPAC212.08c.1"; transcript_source "PomBase"; transcript_biotype "protein_coding"; exon_id "SPAC212.08c.1:exon:1";
I	PomBase	CDS	12158	12991	.	+	0	gene_id "SPAC212.08c"; transcript_id "SPAC212.08c.1"; exon_number "1"; gene_name "SPAC212.08c"; gene_source "PomBase"; gene_biotype "protein_coding"; transcript_name "SPAC212.08c.1"; transcript_source "PomBase"; transcript_biotype "protein_coding"; protein_id "SPAC212.08c.1:pep";
I	PomBase	start_codon	12158	12160	.	+	0	gene_id "SPAC212.08c"; transcript_id "SPAC212.08c.1"; exon_number "1"; gene_name "SPAC212.08c"; gene_source "PomBase"; gene_biotype "protein_coding"; transcript_name "SPAC212.08c.1"; transcript_source "PomBase"; transcript_biotype "protein_coding";
I	PomBase	stop_codon	12992	12994	.	+	0	gene_id "SPAC212.08c"; transcript_id "SPAC212.08c.1"; exon_number "1"; gene_name "SPAC212.08c"; gene_source "PomBase"; gene_biotype "protein_coding"; transcript_name "SPAC212.08c.1"; transcript_source "PomBase"; transcript_biotype "protein_coding";
I	PomBase	five_prime_utr	11784	12157	.	+	.	gene_id "SPAC212.08c"; transcript_id "SPAC212.08c.1"; gene_name "SPAC212.08c"; gene_source "PomBase"; gene_biotype "protein_coding"; transcript_name "SPAC212.08c.1"; transcript_source "PomBase"; transcript_biotype "protein_coding";
I	PomBase	gene	13665	14555	.	+	.	gene_id "SPAC212.07c"; gene_name "SPAC212.07c"; gene_source "PomBase"; gene_biotype "pseudogene";
I	PomBase	transcript	13665	14555	.	+	.	gene_id "SPAC212.07c"; transcript_id "SPAC212.07c.1"; gene_name "SPAC212.07c"; gene_source "PomBase"; gene_biotype "pseudogene"; transcript_name "SPAC212.07c.1"; transcript_source "PomBase"; transcript_biotype "pseudogene";
I	PomBase	exon	13665	14555	.	+	.	gene_id "SPAC212.07c"; transcript_id "SPAC212.07c.1"; exon_number "1"; gene_name "SPAC212.07c"; gene_source "PomBase"; gene_biotype "pseudogene"; transcript_name "SPAC212.07c.1"; transcript_source "PomBase"; transcript_biotype "pseudogene"; exon_id "SPAC212.07c.1:pseudogenic_exon:1";
I	PomBase	gene	15855	16226	.	+	.	gene_id "SPAC212.12"; gene_name "SPAC212.12"; gene_source "PomBase"; gene_biotype "protein_coding";
I	PomBase	transcript	15855	16226	.	+	.	gene_id "SPAC212.12"; transcript_id "SPAC212.12.1"; gene_name "SPAC212.12"; gene_source "PomBase"; gene_biotype "protein_coding"; transcript_name "SPAC212.12.1"; transcript_source "PomBase"; transcript_biotype "protein_coding";
I	PomBase	exon	15855	16226	.	+	.	gene_id "SPAC212.12"; transcript_id "SPAC212.12.1"; exon_number "1"; gene_name "SPAC212.12"; gene_source "PomBase"; gene_biotype "protein_coding"; transcript_name "SPAC212.12.1"; transcript_source "PomBase"; transcript_biotype "protein_coding"; exon_id "SPAC212.12.1:exon:1";
I	PomBase	CDS	15855	16223	.	+	0	gene_id "SPAC212.12"; transcript_id "SPAC212.12.1"; exon_number "1"; gene_name "SPAC212.12"; gene_source "PomBase"; gene_biotype "protein_coding"; transcript_name "SPAC212.12.1"; transcript_source "PomBase"; transcript_biotype "protein_coding"; protein_id "SPAC212.12.1:pep";
I	PomBase	start_codon	15855	15857	.	+	0	gene_id "SPAC212.12"; transcript_id "SPAC212.12.1"; exon_number "1"; gene_name "SPAC212.12"; gene_source "PomBase"; gene_biotype "protein_coding"; transcript_name "SPAC212.12.1"; transcript_source "PomBase"; transcript_biotype "protein_coding";
I	PomBase	stop_codon	16224	16226	.	+	0	gene_id "SPAC212.12"; transcript_id "SPAC212.12.1"; exon_number "1"; gene_name "SPAC212.12"; gene_source "PomBase"; gene_biotype "protein_coding"; transcript_name "SPAC212.12.1"; transcript_source "PomBase"; transcript_biotype "protein_coding";
I	PomBase	gene	18042	18974	.	+	.	gene_id "SPAC212.06c"; gene_name "SPAC212.06c"; gene_source "PomBase"; gene_biotype "protein_coding";
I	PomBase	transcript	18042	18974	.	+	.	gene_id "SPAC212.06c"; transcript_id "SPAC212.06c.1"; gene_name "SPAC212.06c"; gene_source "PomBase"; gene_biotype "protein_coding"; transcript_name "SPAC212.06c.1"; transcript_source "PomBase"; transcript_biotype "protein_coding";
I	PomBase	exon	18042	18306	.	+	.	gene_id "SPAC212.06c"; transcript_id "SPAC212.06c.1"; exon_number "1"; gene_name "SPAC212.06c"; gene_source "PomBase"; gene_biotype "protein_coding"; transcript_name "SPAC212.06c.1"; transcript_source "PomBase"; transcript_biotype "protein_coding"; exon_id "SPAC212.06c.1:exon:1";
I	PomBase	CDS	18072	18306	.	+	0	gene_id "SPAC212.06c"; transcript_id "SPAC212.06c.1"; exon_number "1"; gene_name "SPAC212.06c"; gene_source "PomBase"; gene_biotype "protein_coding"; transcript_name "SPAC212.06c.1"; transcript_source "PomBase"; transcript_biotype "protein_coding"; protein_id "SPAC212.06c.1:pep";
I	PomBase	start_codon	18072	18074	.	+	0	gene_id "SPAC212.06c"; transcript_id "SPAC212.06c.1"; exon_number "1"; gene_name "SPAC212.06c"; gene_source "PomBase"; gene_biotype "protein_coding"; transcript_name "SPAC212.06c.1"; transcript_source "PomBase"; transcript_biotype "protein_coding";
I	PomBase	exon	18349	18974	.	+	.	gene_id "SPAC212.06c"; transcript_id "SPAC212.06c.1"; exon_number "2"; gene_name "SPAC212.06c"; gene_source "PomBase"; gene_biotype "protein_coding"; transcript_name "SPAC212.06c.1"; transcript_source "PomBase"; transcript_biotype "protein_coding"; exon_id "SPAC212.06c.1:exon:2";
I	PomBase	CDS	18349	18557	.	+	2	gene_id "SPAC212.06c"; transcript_id "SPAC212.06c.1"; exon_number "2"; gene_name "SPAC212.06c"; gene_source "PomBase"; gene_biotype "protein_coding"; transcript_name "SPAC212.06c.1"; transcript_source "PomBase"; transcript_biotype "protein_coding"; protein_id "SPAC212.06c.1:pep";
I	PomBase	five_prime_utr	18042	18071	.	+	.	gene_id "SPAC212.06c"; transcript_id "SPAC212.06c.1"; gene_name "SPAC212.06c"; gene_source "PomBase"; gene_biotype "protein_coding"; transcript_name "SPAC212.06c.1"; transcript_source "PomBase"; transcript_biotype "protein_coding";
I	PomBase	three_prime_utr	18558	18974	.	+	.	gene_id "SPAC212.06c"; transcript_id "SPAC212.06c.1"; gene_name "SPAC212.06c"; gene_source "PomBase"; gene_biotype "protein_coding"; transcript_name "SPAC212.06c.1"; transcript_source "PomBase"; transcript_biotype "protein_coding";
I	PomBase	gene	20824	21015	.	+	.	gene_id "SPAC212.05c"; gene_name "SPAC212.05c"; gene_source "PomBase"; gene_biotype "pseudogene";
I	PomBase	transcript	20824	21015	.	+	.	gene_id "SPAC212.05c"; transcript_id "SPAC212.05c.1"; gene_name "SPAC212.05c"; gene_source "PomBase"; gene_biotype "pseudogene"; transcript_name "SPAC212.05c.1"; transcript_source "PomBase"; transcript_biotype "pseudogene";
I	PomBase	exon	20824	21015	.	+	.	gene_id "SPAC212.05c"; transcript_id "SPAC212.05c.1"; exon_number "1"; gene_name "SPAC212.05c"; gene_source "PomBase"; gene_biotype "pseudogene"; transcript_name "SPAC212.05c.1"; transcript_source "PomBase"; transcript_biotype "pseudogene"; exon_id "SPAC212.05c.1:pseudogenic_exon:1";
I	PomBase	gene	21381	23050	.	+	.	gene_id "SPAC212.04c"; gene_name "SPAC212.04c"; gene_source "PomBase"; gene_biotype "protein_coding";
I	PomBase	transcript	21381	23050	.	+	.	gene_id "SPAC212.04c"; transcript_id "SPAC212.04c.1"; gene_name "SPAC212.04c"; gene_source "PomBase"; gene_biotype "protein_coding"; transcript_name "SPAC212.04c.1"; transcript_source "PomBase"; transcript_biotype "protein_coding";
I	PomBase	exon	21381	22076	.	+	.	gene_id "SPAC212.04c"; transcript_id "SPAC212.04c.1"; exon_number "1"; gene_name "SPAC212.04c"; gene_source "PomBase"; gene_biotype "protein_coding"; transcript_name "SPAC212.04c.1"; transcript_source "PomBase"; transcript_biotype "protein_coding"; exon_id "SPAC212.04c.1:exon:1";
I	PomBase	CDS	21587	22076	.	+	0	gene_id "SPAC212.04c"; transcript_id "SPAC212.04c.1"; exon_number "1"; gene_name "SPAC212.04c"; gene_source "PomBase"; gene_biotype "protein_coding"; transcript_name "SPAC212.04c.1"; transcript_source "PomBase"; transcript_biotype "protein_coding"; protein_id "SPAC212.04c.1:pep";
I	PomBase	start_codon	21587	21589	.	+	0	gene_id "SPAC212.04c"; transcript_id "SPAC212.04c.1"; exon_number "1"; gene_name "SPAC212.04c"; gene_source "PomBase"; gene_biotype "protein_coding"; transcript_name "SPAC212.04c.1"; transcript_source "PomBase"; transcript_biotype "protein_coding";
I	PomBase	exon	22132	23050	.	+	.	gene_id "SPAC212.04c"; transcript_id "SPAC212.04c.1"; exon_number "2"; gene_name "SPAC212.04c"; gene_source "PomBase"; gene_biotype "protein_coding"; transcript_name "SPAC212.04c.1"; transcript_source "PomBase"; transcript_biotype "protein_coding"; exon_id "SPAC212.04c.1:exon:2";
I	PomBase	CDS	22132	22508	.	+	2	gene_id "SPAC212.04c"; transcript_id "SPAC212.04c.1"; exon_number "2"; gene_name "SPAC212.04c"; gene_source "PomBase"; gene_biotype "protein_coding"; transcript_name "SPAC212.04c.1"; transcript_source "PomBase"; transcript_biotype "protein_coding"; protein_id "SPAC212.04c.1:pep";
I	PomBase	five_prime_utr	21381	21586	.	+	.	gene_id "SPAC212.04c"; transcript_id "SPAC212.04c.1"; gene_name "SPAC212.04c"; gene_source "PomBase"; gene_biotype "protein_coding"; transcript_name "SPAC212.04c.1"; transcript_source "PomBase"; transcript_biotype "protein_coding";
I	PomBase	three_prime_utr	22509	23050	.	+	.	gene_id "SPAC212.04c"; transcript_id "SPAC212.04c.1"; gene_name "SPAC212.04c"; gene_source "PomBase"; gene_biotype "protein_coding"; transcript_name "SPAC212.04c.1"; transcript_source "PomBase"; transcript_biotype "protein_coding";
I	PomBase	gene	23589	24054	.	-	.	gene_id "SPAC212.03"; gene_name "SPAC212.03"; gene_source "PomBase"; gene_biotype "protein_coding";
I	PomBase	transcript	23589	24054	.	-	.	gene_id "SPAC212.03"; transcript_id "SPAC212.03.1"; gene_name "SPAC212.03"; gene_source "PomBase"; gene_biotype "protein_coding"; transcript_name "SPAC212.03.1"; transcript_source "PomBase"; transcript_biotype "protein_coding";
I	PomBase	exon	23589	24054	.	-	.	gene_id "SPAC212.03"; transcript_id "SPAC212.03.1"; exon_number "1"; gene_name "SPAC212.03"; gene_source "PomBase"; gene_biotype "protein_coding"; transcript_name "SPAC212.03.1"; transcript_source "PomBase"; transcript_biotype "protein_coding"; exon_id "SPAC212.03.1:exon:1";
I	PomBase	CDS	23592	23978	.	-	0	gene_id "SPAC212.03"; transcript_id "SPAC212.03.1"; exon_number "1"; gene_name "SPAC212.03"; gene_source "PomBase"; gene_biotype "protein_coding"; transcript_name "SPAC212.03.1"; transcript_source "PomBase"; transcript_biotype "protein_coding"; protein_id "SPAC212.03.1:pep";
I	PomBase	start_codon	23976	23978	.	-	0	gene_id "SPAC212.03"; transcript_id "SPAC212.03.1"; exon_number "1"; gene_name "SPAC212.03"; gene_source "PomBase"; gene_biotype "protein_coding"; transcript_name "SPAC212.03.1"; transcript_source "PomBase"; transcript_biotype "protein_coding";
I	PomBase	stop_codon	23589	23591	.	-	0	gene_id "SPAC212.03"; transcript_id "SPAC212.03.1"; exon_number "1"; gene_name "SPAC212.03"; gene_source "PomBase"; gene_biotype "protein_coding"; transcript_name "SPAC212.03.1"; transcript_source "PomBase"; transcript_biotype "protein_coding";
I	PomBase	five_prime_utr	23979	24054	.	-	.	gene_id "SPAC212.03"; transcript_id "SPAC212.03.1"; gene_name "SPAC212.03"; gene_source "PomBase"; gene_biotype "protein_coding"; transcript_name "SPAC212.03.1"; transcript_source "PomBase"; transcript_biotype "protein_coding";
I	PomBase	gene	27353	27763	.	-	.	gene_id "SPAC212.02"; gene_name "SPAC212.02"; gene_source "PomBase"; gene_biotype "protein_coding";
I	PomBase	transcript	27353	27763	.	-	.	gene_id "SPAC212.02"; transcript_id "SPAC212.02.1"; gene_name "SPAC212.02"; gene_source "PomBase"; gene_biotype "protein_coding"; transcript_name "SPAC212.02.1"; transcript_source "PomBase"; transcript_biotype "protein_coding";
I	PomBase	exon	27353	27763	.	-	.	gene_id "SPAC212.02"; transcript_id "SPAC212.02.1"; exon_number "1"; gene_name "SPAC212.02"; gene_source "PomBase"; gene_biotype "protein_coding"; transcript_name "SPAC212.02.1"; transcript_source "PomBase"; transcript_biotype "protein_coding"; exon_id "SPAC212.02.1:exon:1";
I	PomBase	CDS	27356	27763	.	-	0	gene_id "SPAC212.02"; transcript_id "SPAC212.02.1"; exon_number "1"; gene_name "SPAC212.02"; gene_source "PomBase"; gene_biotype "protein_coding"; transcript_name "SPAC212.02.1"; transcript_source "PomBase"; transcript_biotype "protein_coding"; protein_id "SPAC212.02.1:pep";
I	PomBase	start_codon	27761	27763	.	-	0	gene_id "SPAC212.02"; transcript_id "SPAC212.02.1"; exon_number "1"; gene_name "SPAC212.02"; gene_source "PomBase"; gene_biotype "protein_coding"; transcript_name "SPAC212.02.1"; transcript_source "PomBase"; transcript_biotype "protein_coding";
I	PomBase	stop_codon	27353	27355	.	-	0	gene_id "SPAC212.02"; transcript_id "SPAC212.02.1"; exon_number "1"; gene_name "SPAC212.02"; gene_source "PomBase"; gene_biotype "protein_coding"; transcript_name "SPAC212.02.1"; transcript_source "PomBase"; transcript_biotype "protein_coding";
I	PomBase	gene	28738	29657	.	+	.	gene_id "SPAC212.01c"; gene_name "SPAC212.01c"; gene_source "PomBase"; gene_biotype "protein_coding";
I	PomBase	transcript	28738	29657	.	+	.	gene_id "SPAC212.01c"; transcript_id "SPAC212.01c.1"; gene_name "SPAC212.01c"; gene_source "PomBase"; gene_biotype "protein_coding"; transcript_name "SPAC212.01c.1"; transcript_source "PomBase"; transcript_biotype "protein_coding";
I	PomBase	exon	28738	29227	.	+	.	gene_id "SPAC212.01c"; transcript_id "SPAC212.01c.1"; exon_number "1"; gene_name "SPAC212.01c"; gene_source "PomBase"; gene_biotype "protein_coding"; transcript_name "SPAC212.01c.1"; transcript_source "PomBase"; transcript_biotype "protein_coding"; exon_id "SPAC212.01c.1:exon:1";
I	PomBase	CDS	28738	29227	.	+	0	gene_id "SPAC212.01c"; transcript_id "SPAC212.01c.1"; exon_number "1"; gene_name "SPAC212.01c"; gene_source "PomBase"; gene_biotype "protein_coding"; transcript_name "SPAC212.01c.1"; transcript_source "PomBase"; transcript_biotype "protein_coding"; protein_id "SPAC212.01c.1:pep";
I	PomBase	start_codon	28738	28740	.	+	0	gene_id "SPAC212.01c"; transcript_id "SPAC212.01c.1"; exon_number "1"; gene_name "SPAC212.01c"; gene_source "PomBase"; gene_biotype "protein_coding"; transcript_name "SPAC212.01c.1"; transcript_source "PomBase"; transcript_biotype "protein_coding";
I	PomBase	exon	29286	29657	.	+	.	gene_id "SPAC212.01c"; transcript_id "SPAC212.01c.1"; exon_number "2"; gene_name "SPAC212.01c"; gene_source "PomBase"; gene_biotype "protein_coding"; transcript_name "SPAC212.01c.1"; transcript_source "PomBase"; transcript_biotype "protein_coding"; exon_id "SPAC212.01c.1:exon:2";
I	PomBase	CDS	29286	29638	.	+	2	gene_id "SPAC212.01c"; transcript_id "SPAC212.01c.1"; exon_number "2"; gene_name "SPAC212.01c"; gene_source "PomBase"; gene_biotype "protein_coding"; transcript_name "SPAC212.01c.1"; transcript_source "PomBase"; transcript_biotype "protein_coding"; protein_id "SPAC212.01c.1:pep";
I	PomBase	three_prime_utr	29639	29657	.	+	.	gene_id "SPAC212.01c"; transcript_id "SPAC212.01c.1"; gene_name "SPAC212.01c"; gene_source "PomBase"; gene_biotype "protein_coding"; transcript_name "SPAC212.01c.1"; transcript_source "PomBase"; transcript_biotype "protein_coding";
I	PomBase	gene	29764	31069	.	+	.	gene_id "SPAC977.01"; gene_name "SPAC977.01"; gene_source "PomBase"; gene_biotype "protein_coding";
I	PomBase	transcript	29764	31069	.	+	.	gene_id "SPAC977.01"; transcript_id "SPAC977.01.1"; gene_name "SPAC977.01"; gene_source "PomBase"; gene_biotype "protein_coding"; transcript_name "SPAC977.01.1"; transcript_source "PomBase"; transcript_biotype "protein_coding";
I	PomBase	exon	29764	31069	.	+	.	gene_id "SPAC977.01"; transcript_id "SPAC977.01.1"; exon_number "1"; gene_name "SPAC977.01"; gene_source "PomBase"; gene_biotype "protein_coding"; transcript_name "SPAC977.01.1"; transcript_source "PomBase"; transcript_biotype "protein_coding"; exon_id "SPAC977.01.1:exon:1";
I	PomBase	CDS	29766	30716	.	+	0	gene_id "SPAC977.01"; transcript_id "SPAC977.01.1"; exon_number "1"; gene_name "SPAC977.01"; gene_source "PomBase"; gene_biotype "protein_coding"; transcript_name "SPAC977.01.1"; transcript_source "PomBase"; transcript_biotype "protein_coding"; protein_id "SPAC977.01.1:pep";
I	PomBase	five_prime_utr	29764	29765	.	+	.	gene_id "SPAC977.01"; transcript_id "SPAC977.01.1"; gene_name "SPAC977.01"; gene_source "PomBase"; gene_biotype "protein_coding"; transcript_name "SPAC977.01.1"; transcript_source "PomBase"; transcript_biotype "protein_coding";
I	PomBase	three_prime_utr	30717	31069	.	+	.	gene_id "SPAC977.01"; transcript_id "SPAC977.01.1"; gene_name "SPAC977.01"; gene_source "PomBase"; gene_biotype "protein_coding"; transcript_name "SPAC977.01.1"; transcript_source "PomBase"; transcript_biotype "protein_coding";
I	PomBase	gene	31140	32345	.	-	.	gene_id "SPAC977.18"; gene_name "SPAC977.18"; gene_source "PomBase"; gene_biotype "protein_coding";
I	PomBase	transcript	31140	32345	.	-	.	gene_id "SPAC977.18"; transcript_id "SPAC977.18.1"; gene_name "SPAC977.18"; gene_source "PomBase"; gene_biotype "protein_coding"; transcript_name "SPAC977.18.1"; transcript_source "PomBase"; transcript_biotype "protein_coding";
I	PomBase	exon	32163	32345	.	-	.	gene_id "SPAC977.18"; transcript_id "SPAC977.18.1"; exon_number "1"; gene_name "SPAC977.18"; gene_source "PomBase"; gene_biotype "protein_coding"; transcript_name "SPAC977.18.1"; transcript_source "PomBase"; transcript_biotype "protein_coding"; exon_id "SPAC977.18.1:exon:1";
I	PomBase	CDS	32163	32187	.	-	0	gene_id "SPAC977.18"; transcript_id "SPAC977.18.1"; exon_number "1"; gene_name "SPAC977.18"; gene_source "PomBase"; gene_biotype "protein_coding"; transcript_name "SPAC977.18.1"; transcript_source "PomBase"; transcript_biotype "protein_coding"; protein_id "SPAC977.18.1:pep";
I	PomBase	start_codon	32185	32187	.	-	0	gene_id "SPAC977.18"; transcript_id "SPAC977.18.1"; exon_number "1"; gene_name "SPAC977.18"; gene_source "PomBase"; gene_biotype "protein_coding"; transcript_name "SPAC977.18.1"; transcript_source "PomBase"; transcript_biotype "protein_coding";
I	PomBase	exon	31768	31913	.	-	.	gene_id "SPAC977.18"; transcript_id "SPAC977.18.1"; exon_number "2"; gene_name "SPAC977.18"; gene_source "PomBase"; gene_biotype "protein_coding"; transcript_name "SPAC977.18.1"; transcript_source "PomBase"; transcript_biotype "protein_coding"; exon_id "SPAC977.18.1:exon:2";
I	PomBase	CDS	31768	31913	.	-	2	gene_id "SPAC977.18"; transcript_id "SPAC977.18.1"; exon_number "2"; gene_name "SPAC977.18"; gene_source "PomBase"; gene_biotype "protein_coding"; transcript_name "SPAC977.18.1"; transcript_source "PomBase"; transcript_biotype "protein_coding"; protein_id "SPAC977.18.1:pep";
I	PomBase	exon	31140	31557	.	-	.	gene_id "SPAC977.18"; transcript_id "SPAC977.18.1"; exon_number "3"; gene_name "SPAC977.18"; gene_source "PomBase"; gene_biotype "protein_coding"; transcript_name "SPAC977.18.1"; transcript_source "PomBase"; transcript_biotype "protein_coding"; exon_id "SPAC977.18.1:exon:3";
I	PomBase	CDS	31330	31557	.	-	0	gene_id "SPAC977.18"; transcript_id "SPAC977.18.1"; exon_number "3"; gene_name "SPAC977.18"; gene_source "PomBase"; gene_biotype "protein_coding"; transcript_name "SPAC977.18.1"; transcript_source "PomBase"; transcript_biotype "protein_coding"; protein_id "SPAC977.18.1:pep";
I	PomBase	stop_codon	31327	31329	.	-	0	gene_id "SPAC977.18"; transcript_id "SPAC977.18.1"; exon_number "3"; gene_name "SPAC977.18"; gene_source "PomBase"; gene_biotype "protein_coding"; transcript_name "SPAC977.18.1"; transcript_source "PomBase"; transcript_biotype "protein_coding";
I	PomBase	five_prime_utr	32188	32345	.	-	.	gene_id "SPAC977.18"; transcript_id "SPAC977.18.1"; gene_name "SPAC977.18"; gene_source "PomBase"; gene_biotype "protein_coding"; transcript_name "SPAC977.18.1"; transcript_source "PomBase"; transcript_biotype "protein_coding";
I	PomBase	three_prime_utr	31140	31326	.	-	.	gene_id "SPAC977.18"; transcript_id "SPAC977.18.1"; gene_name "SPAC977.18"; gene_source "PomBase"; gene_biotype "protein_coding"; transcript_name "SPAC977.18.1"; transcript_source "PomBase"; transcript_biotype "protein_coding";
I	PomBase	gene	32034	33012	.	+	.	gene_id "SPAC977.02"; gene_name "SPAC977.02"; gene_source "PomBase"; gene_biotype "protein_coding";
I	PomBase	transcript	32034	33012	.	+	.	gene_id "SPAC977.02"; transcript_id "SPAC977.02.1"; gene_name "SPAC977.02"; gene_source "PomBase"; gene_biotype "protein_coding"; transcript_name "SPAC977.02.1"; transcript_source "PomBase"; transcript_biotype "protein_coding";
I	PomBase	exon	32034	33012	.	+	.	gene_id "SPAC977.02"; transcript_id "SPAC977.02.1"; exon_number "1"; gene_name "SPAC977.02"; gene_source "PomBase"; gene_biotype "protein_coding"; transcript_name "SPAC977.02.1"; transcript_source "PomBase"; transcript_biotype "protein_coding"; exon_id "SPAC977.02.1:exon:1";
I	PomBase	CDS	32230	32667	.	+	0	gene_id "SPAC977.02"; transcript_id "SPAC977.02.1"; exon_number "1"; gene_name "SPAC977.02"; gene_source "PomBase"; gene_biotype "protein_coding"; transcript_name "SPAC977.02.1"; transcript_source "PomBase"; transcript_biotype "protein_coding"; protein_id "SPAC977.02.1:pep";
I	PomBase	start_codon	32230	32232	.	+	0	gene_id "SPAC977.02"; transcript_id "SPAC977.02.1"; exon_number "1"; gene_name "SPAC977.02"; gene_source "PomBase"; gene_biotype "protein_coding"; transcript_name "SPAC977.02.1"; transcript_source "PomBase"; transcript_biotype "protein_coding";
I	PomBase	stop_codon	32668	32670	.	+	0	gene_id "SPAC977.02"; transcript_id "SPAC977.02.1"; exon_number "1"; gene_name "SPAC977.02"; gene_source "PomBase"; gene_biotype "protein_coding"; transcript_name "SPAC977.02.1"; transcript_source "PomBase"; transcript_biotype "protein_coding";
I	PomBase	five_prime_utr	32034	32229	.	+	.	gene_id "SPAC977.02"; transcript_id "SPAC977.02.1"; gene_name "SPAC977.02"; gene_source "PomBase"; gene_biotype "protein_coding"; transcript_name "SPAC977.02.1"; transcript_source "PomBase"; transcript_biotype "protein_coding";
I	PomBase	three_prime_utr	32671	33012	.	+	.	gene_id "SPAC977.02"; transcript_id "SPAC977.02.1"; gene_name "SPAC977.02"; gene_source "PomBase"; gene_biotype "protein_coding"; transcript_name "SPAC977.02.1"; transcript_source "PomBase"; transcript_biotype "protein_coding";
I	PomBase	gene	33835	34272	.	+	.	gene_id "SPAC977.03"; gene_name "SPAC977.03"; gene_source "PomBase"; gene_biotype "protein_coding";
I	PomBase	transcript	33835	34272	.	+	.	gene_id "SPAC977.03"; transcript_id "SPAC977.03.1"; gene_name "SPAC977.03"; gene_source "PomBase"; gene_biotype "protein_coding"; transcript_name "SPAC977.03.1"; transcript_source "PomBase"; transcript_biotype "protein_coding";
I	PomBase	exon	33835	34272	.	+	.	gene_id "SPAC977.03"; transcript_id "SPAC977.03.1"; exon_number "1"; gene_name "SPAC977.03"; gene_source "PomBase"; gene_biotype "protein_coding"; transcript_name "SPAC977.03.1"; transcript_source "PomBase"; transcript_biotype "protein_coding"; exon_id "SPAC977.03.1:exon:1";
I	PomBase	CDS	33835	34269	.	+	0	gene_id "SPAC977.03"; transcript_id "SPAC977.03.1"; exon_number "1"; gene_name "SPAC977.03"; gene_source "PomBase"; gene_biotype "protein_coding"; transcript_name "SPAC977.03.1"; transcript_source "PomBase"; transcript_biotype "protein_coding"; protein_id "SPAC977.03.1:pep";
I	PomBase	start_codon	33835	33837	.	+	0	gene_id "SPAC977.03"; transcript_id "SPAC977.03.1"; exon_number "1"; gene_name "SPAC977.03"; gene_source "PomBase"; gene_biotype "protein_coding"; transcript_name "SPAC977.03.1"; transcript_source "PomBase"; transcript_biotype "protein_coding";
I	PomBase	stop_codon	34270	34272	.	+	0	gene_id "SPAC977.03"; transcript_id "SPAC977.03.1"; exon_number "1"; gene_name "SPAC977.03"; gene_source "PomBase"; gene_biotype "protein_coding"; transcript_name "SPAC977.03.1"; transcript_source "PomBase"; transcript_biotype "protein_coding";
I	PomBase	gene	34298	34978	.	+	.	gene_id "SPAC977.04"; gene_name "SPAC977.04"; gene_source "PomBase"; gene_biotype "protein_coding";
I	PomBase	transcript	34298	34978	.	+	.	gene_id "SPAC977.04"; transcript_id "SPAC977.04.1"; gene_name "SPAC977.04"; gene_source "PomBase"; gene_biotype "protein_coding"; transcript_name "SPAC977.04.1"; transcript_source "PomBase"; transcript_biotype "protein_coding";
I	PomBase	exon	34298	34978	.	+	.	gene_id "SPAC977.04"; transcript_id "SPAC977.04.1"; exon_number "1"; gene_name "SPAC977.04"; gene_source "PomBase"; gene_biotype "protein_coding"; transcript_name "SPAC977.04.1"; transcript_source "PomBase"; transcript_biotype "protein_coding"; exon_id "SPAC977.04.1:exon:1";
I	PomBase	CDS	34349	34813	.	+	0	gene_id "SPAC977.04"; transcript_id "SPAC977.04.1"; exon_number "1"; gene_name "SPAC977.04"; gene_source "PomBase"; gene_biotype "protein_coding"; transcript_name "SPAC977.04.1"; transcript_source "PomBase"; transcript_biotype "protein_coding"; protein_id "SPAC977.04.1:pep";
I	PomBase	start_codon	34349	34351	.	+	0	gene_id "SPAC977.04"; transcript_id "SPAC977.04.1"; exon_number "1"; gene_name "SPAC977.04"; gene_source "PomBase"; gene_biotype "protein_coding"; transcript_name "SPAC977.04.1"; transcript_source "PomBase"; transcript_biotype "protein_coding";
I	PomBase	stop_codon	34814	34816	.	+	0	gene_id "SPAC977.04"; transcript_id "SPAC977.04.1"; exon_number "1"; gene_name "SPAC977.04"; gene_source "PomBase"; gene_biotype "protein_coding"; transcript_name "SPAC977.04.1"; transcript_source "PomBase"; transcript_biotype "protein_coding";
I	PomBase	five_prime_utr	34298	34348	.	+	.	gene_id "SPAC977.04"; transcript_id "SPAC977.04.1"; gene_name "SPAC977.04"; gene_source "PomBase"; gene_biotype "protein_coding"; transcript_name "SPAC977.04.1"; transcript_source "PomBase"; transcript_biotype "protein_coding";
I	PomBase	three_prime_utr	34817	34978	.	+	.	gene_id "SPAC977.04"; transcript_id "SPAC977.04.1"; gene_name "SPAC977.04"; gene_source "PomBase"; gene_biotype "protein_coding"; transcript_name "SPAC977.04.1"; transcript_source "PomBase"; transcript_biotype "protein_coding";
I	PomBase	gene	35768	36382	.	-	.	gene_id "SPAC977.05c"; gene_name "SPAC977.05c"; gene_source "PomBase"; gene_biotype "protein_coding";
I	PomBase	transcript	35768	36382	.	-	.	gene_id "SPAC977.05c"; transcript_id "SPAC977.05c.1"; gene_name "SPAC977.05c"; gene_source "PomBase"; gene_biotype "protein_coding"; transcript_name "SPAC977.05c.1"; transcript_source "PomBase"; transcript_biotype "protein_coding";
I	PomBase	exon	35768	36382	.	-	.	gene_id "SPAC977.05c"; transcript_id "SPAC977.05c.1"; exon_number "1"; gene_name "SPAC977.05c"; gene_source "PomBase"; gene_biotype "protein_coding"; transcript_name "SPAC977.05c.1"; transcript_source "PomBase"; transcript_biotype "protein_coding"; exon_id "SPAC977.05c.1:exon:1";
I	PomBase	CDS	35771	36382	.	-	0	gene_id "SPAC977.05c"; transcript_id "SPAC977.05c.1"; exon_number "1"; gene_name "SPAC977.05c"; gene_source "PomBase"; gene_biotype "protein_coding"; transcript_name "SPAC977.05c.1"; transcript_source "PomBase"; transcript_biotype "protein_coding"; protein_id "SPAC977.05c.1:pep";
I	PomBase	start_codon	36380	36382	.	-	0	gene_id "SPAC977.05c"; transcript_id "SPAC977.05c.1"; exon_number "1"; gene_name "SPAC977.05c"; gene_source "PomBase"; gene_biotype "protein_coding"; transcript_name "SPAC977.05c.1"; transcript_source "PomBase"; transcript_biotype "protein_coding";
I	PomBase	stop_codon	35768	35770	.	-	0	gene_id "SPAC977.05c"; transcript_id "SPAC977.05c.1"; exon_number "1"; gene_name "SPAC977.05c"; gene_source "PomBase"; gene_biotype "protein_coding"; transcript_name "SPAC977.05c.1"; transcript_source "PomBase"; transcript_biotype "protein_coding";
I	PomBase	gene	39416	40072	.	+	.	gene_id "SPAC977.06"; gene_name "SPAC977.06"; gene_source "PomBase"; gene_biotype "protein_coding";
I	PomBase	transcript	39416	40072	.	+	.	gene_id "SPAC977.06"; transcript_id "SPAC977.06.1"; gene_name "SPAC977.06"; gene_source "PomBase"; gene_biotype "protein_coding"; transcript_name "SPAC977.06.1"; transcript_source "PomBase"; transcript_biotype "protein_coding";
I	PomBase	exon	39416	39848	.	+	.	gene_id "SPAC977.06"; transcript_id "SPAC977.06.1"; exon_number "1"; gene_name "SPAC977.06"; gene_source "PomBase"; gene_biotype "protein_coding"; transcript_name "SPAC977.06.1"; transcript_source "PomBase"; transcript_biotype "protein_coding"; exon_id "SPAC977.06.1:exon:1";
I	PomBase	CDS	39431	39848	.	+	0	gene_id "SPAC977.06"; transcript_id "SPAC977.06.1"; exon_number "1"; gene_name "SPAC977.06"; gene_source "PomBase"; gene_biotype "protein_coding"; transcript_name "SPAC977.06.1"; transcript_source "PomBase"; transcript_biotype "protein_coding"; protein_id "SPAC977.06.1:pep";
I	PomBase	start_codon	39431	39433	.	+	0	gene_id "SPAC977.06"; transcript_id "SPAC977.06.1"; exon_number "1"; gene_name "SPAC977.06"; gene_source "PomBase"; gene_biotype "protein_coding"; transcript_name "SPAC977.06.1"; transcript_source "PomBase"; transcript_biotype "protein_coding";
I	PomBase	exon	39899	40072	.	+	.	gene_id "SPAC977.06"; transcript_id "SPAC977.06.1"; exon_number "2"; gene_name "SPAC977.06"; gene_source "PomBase"; gene_biotype "protein_coding"; transcript_name "SPAC977.06.1"; transcript_source "PomBase"; transcript_biotype "protein_coding"; exon_id "SPAC977.06.1:exon:2";
I	PomBase	CDS	39899	40050	.	+	2	gene_id "SPAC977.06"; transcript_id "SPAC977.06.1"; exon_number "2"; gene_name "SPAC977.06"; gene_source "PomBase"; gene_biotype "protein_coding"; transcript_name "SPAC977.06.1"; transcript_source "PomBase"; transcript_biotype "protein_coding"; protein_id "SPAC977.06.1:pep";
I	PomBase	five_prime_utr	39416	39430	.	+	.	gene_id "SPAC977.06"; transcript_id "SPAC977.06.1"; gene_name "SPAC977.06"; gene_source "PomBase"; gene_biotype "protein_coding"; transcript_name "SPAC977.06.1"; transcript_source "PomBase"; transcript_biotype "protein_coding";
I	PomBase	three_prime_utr	40051	40072	.	+	.	gene_id "SPAC977.06"; transcript_id "SPAC977.06.1"; gene_name "SPAC977.06"; gene_source "PomBase"; gene_biotype "protein_coding"; transcript_name "SPAC977.06.1"; transcript_source "PomBase"; transcript_biotype "protein_coding";
I	PomBase	gene	40795	41489	.	+	.	gene_id "SPNCRNA.136"; gene_name "SPNCRNA.136"; gene_source "PomBase"; gene_biotype "ncRNA";
I	PomBase	transcript	40795	41489	.	+	.	gene_id "SPNCRNA.136"; transcript_id "SPNCRNA.136.1"; gene_name "SPNCRNA.136"; gene_source "PomBase"; gene_biotype "ncRNA"; transcript_name "SPNCRNA.136.1"; transcript_source "PomBase"; transcript_biotype "ncRNA";
I	PomBase	exon	40795	41489	.	+	.	gene_id "SPNCRNA.136"; transcript_id "SPNCRNA.136.1"; exon_number "1"; gene_name "SPNCRNA.136"; gene_source "PomBase"; gene_biotype "ncRNA"; transcript_name "SPNCRNA.136.1"; transcript_source "PomBase"; transcript_biotype "ncRNA"; exon_id "SPNCRNA.136.1:exon:1";
I	PomBase	gene	40916	41770	.	-	.	gene_id "SPNCRNA.601"; gene_name "SPNCRNA.601"; gene_source "PomBase"; gene_biotype "ncRNA";
I	PomBase	transcript	40916	41770	.	-	.	gene_id "SPNCRNA.601"; transcript_id "SPNCRNA.601.1"; gene_name "SPNCRNA.601"; gene_source "PomBase"; gene_biotype "ncRNA"; transcript_name "SPNCRNA.601.1"; transcript_source "PomBase"; transcript_biotype "ncRNA";
I	PomBase	exon	40916	41770	.	-	.	gene_id "SPNCRNA.601"; transcript_id "SPNCRNA.601.1"; exon_number "1"; gene_name "SPNCRNA.601"; gene_source "PomBase"; gene_biotype "ncRNA"; transcript_name "SPNCRNA.601.1"; transcript_source "PomBase"; transcript_biotype "ncRNA"; exon_id "SPNCRNA.601.1:exon:1";
I	PomBase	gene	42057	43307	.	-	.	gene_id "SPAC977.07c"; gene_name "pfl6"; gene_source "PomBase"; gene_biotype "protein_coding";
I	PomBase	transcript	42057	43307	.	-	.	gene_id "SPAC977.07c"; transcript_id "SPAC977.07c.1"; gene_name "pfl6"; gene_source "PomBase"; gene_biotype "protein_coding"; transcript_name "pfl6"; transcript_source "PomBase"; transcript_biotype "protein_coding";
I	PomBase	exon	42057	43307	.	-	.	gene_id "SPAC977.07c"; transcript_id "SPAC977.07c.1"; exon_number "1"; gene_name "pfl6"; gene_source "PomBase"; gene_biotype "protein_coding"; transcript_name "pfl6"; transcript_source "PomBase"; transcript_biotype "protein_coding"; exon_id "SPAC977.07c.1:exon:1";
I	PomBase	CDS	42060	43307	.	-	0	gene_id "SPAC977.07c"; transcript_id "SPAC977.07c.1"; exon_number "1"; gene_name "pfl6"; gene_source "PomBase"; gene_biotype "protein_coding"; transcript_name "pfl6"; transcript_source "PomBase"; transcript_biotype "protein_coding"; protein_id "SPAC977.07c.1:pep";
I	PomBase	start_codon	43305	43307	.	-	0	gene_id "SPAC977.07c"; transcript_id "SPAC977.07c.1"; exon_number "1"; gene_name "pfl6"; gene_source "PomBase"; gene_biotype "protein_coding"; transcript_name "pfl6"; transcript_source "PomBase"; transcript_biotype "protein_coding";
I	PomBase	stop_codon	42057	42059	.	-	0	gene_id "SPAC977.07c"; transcript_id "SPAC977.07c.1"; exon_number "1"; gene_name "pfl6"; gene_source "PomBase"; gene_biotype "protein_coding"; transcript_name "pfl6"; transcript_source "PomBase"; transcript_biotype "protein_coding";
I	PomBase	gene	44644	45468	.	+	.	gene_id "SPAC977.08"; gene_name "SPAC977.08"; gene_source "PomBase"; gene_biotype "protein_coding";
I	PomBase	transcript	44644	45468	.	+	.	gene_id "SPAC977.08"; transcript_id "SPAC977.08.1"; gene_name "SPAC977.08"; gene_source "PomBase"; gene_biotype "protein_coding"; transcript_name "SPAC977.08.1"; transcript_source "PomBase"; transcript_biotype "protein_coding";
I	PomBase	exon	44644	45468	.	+	.	gene_id "SPAC977.08"; transcript_id "SPAC977.08.1"; exon_number "1"; gene_name "SPAC977.08"; gene_source "PomBase"; gene_biotype "protein_coding"; transcript_name "SPAC977.08.1"; transcript_source "PomBase"; transcript_biotype "protein_coding"; exon_id "SPAC977.08.1:exon:1";
I	PomBase	CDS	44704	45411	.	+	0	gene_id "SPAC977.08"; transcript_id "SPAC977.08.1"; exon_number "1"; gene_name "SPAC977.08"; gene_source "PomBase"; gene_biotype "protein_coding"; transcript_name "SPAC977.08.1"; transcript_source "PomBase"; transcript_biotype "protein_coding"; protein_id "SPAC977.08.1:pep";
I	PomBase	start_codon	44704	44706	.	+	0	gene_id "SPAC977.08"; transcript_id "SPAC977.08.1"; exon_number "1"; gene_name "SPAC977.08"; gene_source "PomBase"; gene_biotype "protein_coding"; transcript_name "SPAC977.08.1"; transcript_source "PomBase"; transcript_biotype "protein_coding";
I	PomBase	stop_codon	45412	45414	.	+	0	gene_id "SPAC977.08"; transcript_id "SPAC977.08.1"; exon_number "1"; gene_name "SPAC977.08"; gene_source "PomBase"; gene_biotype "protein_coding"; transcript_name "SPAC977.08.1"; transcript_source "PomBase"; transcript_biotype "protein_coding";
I	PomBase	five_prime_utr	44644	44703	.	+	.	gene_id "SPAC977.08"; transcript_id "SPAC977.08.1"; gene_name "SPAC977.08"; gene_source "PomBase"; gene_biotype "protein_coding"; transcript_name "SPAC977.08.1"; transcript_source "PomBase"; transcript_biotype "protein_coding";
I	PomBase	three_prime_utr	45415	45468	.	+	.	gene_id "SPAC977.08"; transcript_id "SPAC977.08.1"; gene_name "SPAC977.08"; gene_source "PomBase"; gene_biotype "protein_coding"; transcript_name "SPAC977.08.1"; transcript_source "PomBase"; transcript_biotype "protein_coding";
I	PomBase	gene	45875	48399	.	-	.	gene_id "SPAC977.09c"; gene_name "SPAC977.09c"; gene_source "PomBase"; gene_biotype "protein_coding";
I	PomBase	transcript	45875	48399	.	-	.	gene_id "SPAC977.09c"; transcript_id "SPAC977.09c.1"; gene_name "SPAC977.09c"; gene_source "PomBase"; gene_biotype "protein_coding"; transcript_name "SPAC977.09c.1"; transcript_source "PomBase"; transcript_biotype "protein_coding";
I	PomBase	exon	46208	48399	.	-	.	gene_id "SPAC977.09c"; transcript_id "SPAC977.09c.1"; exon_number "1"; gene_name "SPAC977.09c"; gene_source "PomBase"; gene_biotype "protein_coding"; transcript_name "SPAC977.09c.1"; transcript_source "PomBase"; transcript_biotype "protein_coding"; exon_id "SPAC977.09c.1:exon:1";
I	PomBase	CDS	46208	48160	.	-	0	gene_id "SPAC977.09c"; transcript_id "SPAC977.09c.1"; exon_number "1"; gene_name "SPAC977.09c"; gene_source "PomBase"; gene_biotype "protein_coding"; transcript_name "SPAC977.09c.1"; transcript_source "PomBase"; transcript_biotype "protein_coding"; protein_id "SPAC977.09c.1:pep";
I	PomBase	start_codon	48158	48160	.	-	0	gene_id "SPAC977.09c"; transcript_id "SPAC977.09c.1"; exon_number "1"; gene_name "SPAC977.09c"; gene_source "PomBase"; gene_biotype "protein_coding"; transcript_name "SPAC977.09c.1"; transcript_source "PomBase"; transcript_biotype "protein_coding";
I	PomBase	exon	45875	46143	.	-	.	gene_id "SPAC977.09c"; transcript_id "SPAC977.09c.1"; exon_number "2"; gene_name "SPAC977.09c"; gene_source "PomBase"; gene_biotype "protein_coding"; transcript_name "SPAC977.09c.1"; transcript_source "PomBase"; transcript_biotype "protein_coding"; exon_id "SPAC977.09c.1:exon:2";
I	PomBase	CDS	46078	46143	.	-	0	gene_id "SPAC977.09c"; transcript_id "SPAC977.09c.1"; exon_number "2"; gene_name "SPAC977.09c"; gene_source "PomBase"; gene_biotype "protein_coding"; transcript_name "SPAC977.09c.1"; transcript_source "PomBase"; transcript_biotype "protein_coding"; protein_id "SPAC977.09c.1:pep";
I	PomBase	stop_codon	46075	46077	.	-	0	gene_id "SPAC977.09c"; transcript_id "SPAC977.09c.1"; exon_number "2"; gene_name "SPAC977.09c"; gene_source "PomBase"; gene_biotype "protein_coding"; transcript_name "SPAC977.09c.1"; transcript_source "PomBase"; transcript_biotype "protein_coding";
I	PomBase	five_prime_utr	48161	48399	.	-	.	gene_id "SPAC977.09c"; transcript_id "SPAC977.09c.1"; gene_name "SPAC977.09c"; gene_source "PomBase"; gene_biotype "protein_coding"; transcript_name "SPAC977.09c.1"; transcript_source "PomBase"; transcript_biotype "protein_coding";
I	PomBase	three_prime_utr	45875	46074	.	-	.	gene_id "SPAC977.09c"; transcript_id "SPAC977.09c.1"; gene_name "SPAC977.09c"; gene_source "PomBase"; gene_biotype "protein_coding"; transcript_name "SPAC977.09c.1"; transcript_source "PomBase"; transcript_biotype "protein_coding";
I	PomBase	gene	50851	51545	.	-	.	gene_id "SPNCRNA.602"; gene_name "SPNCRNA.602"; gene_source "PomBase"; gene_biotype "ncRNA";
I	PomBase	transcript	50851	51545	.	-	.	gene_id "SPNCRNA.602"; transcript_id "SPNCRNA.602.1"; gene_name "SPNCRNA.602"; gene_source "PomBase"; gene_biotype "ncRNA"; transcript_name "SPNCRNA.602.1"; transcript_source "PomBase"; transcript_biotype "ncRNA";
I	PomBase	exon	50851	51545	.	-	.	gene_id "SPNCRNA.602"; transcript_id "SPNCRNA.602.1"; exon_number "1"; gene_name "SPNCRNA.602"; gene_source "PomBase"; gene_biotype "ncRNA"; transcript_name "SPNCRNA.602.1"; transcript_source "PomBase"; transcript_biotype "ncRNA"; exon_id "SPNCRNA.602.1:exon:1";
I	PomBase	gene	50946	53858	.	+	.	gene_id "SPAC977.10"; gene_name "sod2"; gene_source "PomBase"; gene_biotype "protein_coding";
I	PomBase	transcript	50946	53858	.	+	.	gene_id "SPAC977.10"; transcript_id "SPAC977.10.1"; gene_name "sod2"; gene_source "PomBase"; gene_biotype "protein_coding"; transcript_name "sod2"; transcript_source "PomBase"; transcript_biotype "protein_coding";
I	PomBase	exon	50946	52240	.	+	.	gene_id "SPAC977.10"; transcript_id "SPAC977.10.1"; exon_number "1"; gene_name "sod2"; gene_source "PomBase"; gene_biotype "protein_coding"; transcript_name "sod2"; transcript_source "PomBase"; transcript_biotype "protein_coding"; exon_id "SPAC977.10.1:exon:1";
I	PomBase	CDS	52117	52240	.	+	0	gene_id "SPAC977.10"; transcript_id "SPAC977.10.1"; exon_number "1"; gene_name "sod2"; gene_source "PomBase"; gene_biotype "protein_coding"; transcript_name "sod2"; transcript_source "PomBase"; transcript_biotype "protein_coding"; protein_id "SPAC977.10.1:pep";
I	PomBase	start_codon	52117	52119	.	+	0	gene_id "SPAC977.10"; transcript_id "SPAC977.10.1"; exon_number "1"; gene_name "sod2"; gene_source "PomBase"; gene_biotype "protein_coding"; transcript_name "sod2"; transcript_source "PomBase"; transcript_biotype "protein_coding";
I	PomBase	exon	52318	53858	.	+	.	gene_id "SPAC977.10"; transcript_id "SPAC977.10.1"; exon_number "2"; gene_name "sod2"; gene_source "PomBase"; gene_biotype "protein_coding"; transcript_name "sod2"; transcript_source "PomBase"; transcript_biotype "protein_coding"; exon_id "SPAC977.10.1:exon:2";
I	PomBase	CDS	52318	53600	.	+	2	gene_id "SPAC977.10"; transcript_id "SPAC977.10.1"; exon_number "2"; gene_name "sod2"; gene_source "PomBase"; gene_biotype "protein_coding"; transcript_name "sod2"; transcript_source "PomBase"; transcript_biotype "protein_coding"; protein_id "SPAC977.10.1:pep";
I	PomBase	five_prime_utr	50946	52116	.	+	.	gene_id "SPAC977.10"; transcript_id "SPAC977.10.1"; gene_name "sod2"; gene_source "PomBase"; gene_biotype "protein_coding"; transcript_name "sod2"; transcript_source "PomBase"; transcript_biotype "protein_coding";
I	PomBase	three_prime_utr	53601	53858	.	+	.	gene_id "SPAC977.10"; transcript_id "SPAC977.10.1"; gene_name "sod2"; gene_source "PomBase"; gene_biotype "protein_coding"; transcript_name "sod2"; transcript_source "PomBase"; transcript_biotype "protein_coding";
I	PomBase	gene	51158	51583	.	+	.	gene_id "SPNCRNA.19"; gene_name "prl19"; gene_source "PomBase"; gene_biotype "ncRNA";
I	PomBase	transcript	51158	51583	.	+	.	gene_id "SPNCRNA.19"; transcript_id "SPNCRNA.19.1"; gene_name "prl19"; gene_source "PomBase"; gene_biotype "ncRNA"; transcript_name "prl19"; transcript_source "PomBase"; transcript_biotype "ncRNA";
I	PomBase	exon	51158	51583	.	+	.	gene_id "SPNCRNA.19"; transcript_id "SPNCRNA.19.1"; exon_number "1"; gene_name "prl19"; gene_source "PomBase"; gene_biotype "ncRNA"; transcript_name "prl19"; transcript_source "PomBase"; transcript_biotype "ncRNA"; exon_id "SPNCRNA.19.1:exon:1";
I	PomBase	gene	55059	56308	.	+	.	gene_id "SPAC977.11"; gene_name "SPAC977.11"; gene_source "PomBase"; gene_biotype "protein_coding";
I	PomBase	transcript	55059	56308	.	+	.	gene_id "SPAC977.11"; transcript_id "SPAC977.11.1"; gene_name "SPAC977.11"; gene_source "PomBase"; gene_biotype "protein_coding"; transcript_name "SPAC977.11.1"; transcript_source "PomBase"; transcript_biotype "protein_coding";
I	PomBase	exon	55059	56308	.	+	.	gene_id "SPAC977.11"; transcript_id "SPAC977.11.1"; exon_number "1"; gene_name "SPAC977.11"; gene_source "PomBase"; gene_biotype "protein_coding"; transcript_name "SPAC977.11.1"; transcript_source "PomBase"; transcript_biotype "protein_coding"; exon_id "SPAC977.11.1:exon:1";
I	PomBase	CDS	55274	56206	.	+	0	gene_id "SPAC977.11"; transcript_id "SPAC977.11.1"; exon_number "1"; gene_name "SPAC977.11"; gene_source "PomBase"; gene_biotype "protein_coding"; transcript_name "SPAC977.11.1"; transcript_source "PomBase"; transcript_biotype "protein_coding"; protein_id "SPAC977.11.1:pep";
I	PomBase	start_codon	55274	55276	.	+	0	gene_id "SPAC977.11"; transcript_id "SPAC977.11.1"; exon_number "1"; gene_name "SPAC977.11"; gene_source "PomBase"; gene_biotype "protein_coding"; transcript_name "SPAC977.11.1"; transcript_source "PomBase"; transcript_biotype "protein_coding";
I	PomBase	stop_codon	56207	56209	.	+	0	gene_id "SPAC977.11"; transcript_id "SPAC977.11.1"; exon_number "1"; gene_name "SPAC977.11"; gene_source "PomBase"; gene_biotype "protein_coding"; transcript_name "SPAC977.11.1"; transcript_source "PomBase"; transcript_biotype "protein_coding";
I	PomBase	five_prime_utr	55059	55273	.	+	.	gene_id "SPAC977.11"; transcript_id "SPAC977.11.1"; gene_name "SPAC977.11"; gene_source "PomBase"; gene_biotype "protein_coding"; transcript_name "SPAC977.11.1"; transcript_source "PomBase"; transcript_biotype "protein_coding";
I	PomBase	three_prime_utr	56210	56308	.	+	.	gene_id "SPAC977.11"; transcript_id "SPAC977.11.1"; gene_name "SPAC977.11"; gene_source "PomBase"; gene_biotype "protein_coding"; transcript_name "SPAC977.11.1"; transcript_source "PomBase"; transcript_biotype "protein_coding";
I	PomBase	gene	56373	57736	.	+	.	gene_id "SPAC977.12"; gene_name "SPAC977.12"; gene_source "PomBase"; gene_biotype "protein_coding";
I	PomBase	transcript	56373	57736	.	+	.	gene_id "SPAC977.12"; transcript_id "SPAC977.12.1"; gene_name "SPAC977.12"; gene_source "PomBase"; gene_biotype "protein_coding"; transcript_name "SPAC977.12.1"; transcript_source "PomBase"; transcript_biotype "protein_coding";
I	PomBase	exon	56373	57736	.	+	.	gene_id "SPAC977.12"; transcript_id "SPAC977.12.1"; exon_number "1"; gene_name "SPAC977.12"; gene_source "PomBase"; gene_biotype "protein_coding"; transcript_name "SPAC977.12.1"; transcript_source "PomBase"; transcript_biotype "protein_coding"; exon_id "SPAC977.12.1:exon:1";
I	PomBase	CDS	56492	57559	.	+	0	gene_id "SPAC977.12"; transcript_id "SPAC977.12.1"; exon_number "1"; gene_name "SPAC977.12"; gene_source "PomBase"; gene_biotype "protein_coding"; transcript_name "SPAC977.12.1"; transcript_source "PomBase"; transcript_biotype "protein_coding"; protein_id "SPAC977.12.1:pep";
I	PomBase	start_codon	56492	56494	.	+	0	gene_id "SPAC977.12"; transcript_id "SPAC977.12.1"; exon_number "1"; gene_name "SPAC977.12"; gene_source "PomBase"; gene_biotype "protein_coding"; transcript_name "SPAC977.12.1"; transcript_source "PomBase"; transcript_biotype "protein_coding";
I	PomBase	stop_codon	57560	57562	.	+	0	gene_id "SPAC977.12"; transcript_id "SPAC977.12.1"; exon_number "1"; gene_name "SPAC977.12"; gene_source "PomBase"; gene_biotype "protein_coding"; transcript_name "SPAC977.12.1"; transcript_source "PomBase"; transcript_biotype "protein_coding";
I	PomBase	five_prime_utr	56373	56491	.	+	.	gene_id "SPAC977.12"; transcript_id "SPAC977.12.1"; gene_name "SPAC977.12"; gene_source "PomBase"; gene_biotype "protein_coding"; transcript_name "SPAC977.12.1"; transcript_source "PomBase"; transcript_biotype "protein_coding";
I	PomBase	three_prime_utr	57563	57736	.	+	.	gene_id "SPAC977.12"; transcript_id "SPAC977.12.1"; gene_name "SPAC977.12"; gene_source "PomBase"; gene_biotype "protein_coding"; transcript_name "SPAC977.12.1"; transcript_source "PomBase"; transcript_biotype "protein_coding";
I	PomBase	gene	58277	59105	.	-	.	gene_id "SPAC977.13c"; gene_name "SPAC977.13c"; gene_source "PomBase"; gene_biotype "pseudogene";
I	PomBase	transcript	58277	59105	.	-	.	gene_id "SPAC977.13c"; transcript_id "SPAC977.13c.1"; gene_name "SPAC977.13c"; gene_source "PomBase"; gene_biotype "pseudogene"; transcript_name "SPAC977.13c.1"; transcript_source "PomBase"; transcript_biotype "pseudogene";
I	PomBase	exon	58277	59105	.	-	.	gene_id "SPAC977.13c"; transcript_id "SPAC977.13c.1"; exon_number "1"; gene_name "SPAC977.13c"; gene_source "PomBase"; gene_biotype "pseudogene"; transcript_name "SPAC977.13c.1"; transcript_source "PomBase"; transcript_biotype "pseudogene"; exon_id "SPAC977.13c.1:pseudogenic_exon:1";
I	PomBase	gene	59614	60907	.	-	.	gene_id "SPAC977.14c"; gene_name "SPAC977.14c"; gene_source "PomBase"; gene_biotype "protein_coding";
I	PomBase	transcript	59614	60907	.	-	.	gene_id "SPAC977.14c"; transcript_id "SPAC977.14c.1"; gene_name "SPAC977.14c"; gene_source "PomBase"; gene_biotype "protein_coding"; transcript_name "SPAC977.14c.1"; transcript_source "PomBase"; transcript_biotype "protein_coding";
I	PomBase	exon	59614	60907	.	-	.	gene_id "SPAC977.14c"; transcript_id "SPAC977.14c.1"; exon_number "1"; gene_name "SPAC977.14c"; gene_source "PomBase"; gene_biotype "protein_coding"; transcript_name "SPAC977.14c.1"; transcript_source "PomBase"; transcript_biotype "protein_coding"; exon_id "SPAC977.14c.1:exon:1";
I	PomBase	CDS	59715	60770	.	-	0	gene_id "SPAC977.14c"; transcript_id "SPAC977.14c.1"; exon_number "1"; gene_name "SPAC977.14c"; gene_source "PomBase"; gene_biotype "protein_coding"; transcript_name "SPAC977.14c.1"; transcript_source "PomBase"; transcript_biotype "protein_coding"; protein_id "SPAC977.14c.1:pep";
I	PomBase	start_codon	60768	60770	.	-	0	gene_id "SPAC977.14c"; transcript_id "SPAC977.14c.1"; exon_number "1"; gene_name "SPAC977.14c"; gene_source "PomBase"; gene_biotype "protein_coding"; transcript_name "SPAC977.14c.1"; transcript_source "PomBase"; transcript_biotype "protein_coding";
I	PomBase	five_prime_utr	60771	60907	.	-	.	gene_id "SPAC977.14c"; transcript_id "SPAC977.14c.1"; gene_name "SPAC977.14c"; gene_source "PomBase"; gene_biotype "protein_coding"; transcript_name "SPAC977.14c.1"; transcript_source "PomBase"; transcript_biotype "protein_coding";
I	PomBase	three_prime_utr	59614	59714	.	-	.	gene_id "SPAC977.14c"; transcript_id "SPAC977.14c.1"; gene_name "SPAC977.14c"; gene_source "PomBase"; gene_biotype "protein_coding"; transcript_name "SPAC977.14c.1"; transcript_source "PomBase"; transcript_biotype "protein_coding";
I	PomBase	gene	62961	63862	.	+	.	gene_id "SPAC977.15"; gene_name "SPAC977.15"; gene_source "PomBase"; gene_biotype "protein_coding";
I	PomBase	transcript	62961	63862	.	+	.	gene_id "SPAC977.15"; transcript_id "SPAC977.15.1"; gene_name "SPAC977.15"; gene_source "PomBase"; gene_biotype "protein_coding"; transcript_name "SPAC977.15.1"; transcript_source "PomBase"; transcript_biotype "protein_coding";
I	PomBase	exon	62961	63862	.	+	.	gene_id "SPAC977.15"; transcript_id "SPAC977.15.1"; exon_number "1"; gene_name "SPAC977.15"; gene_source "PomBase"; gene_biotype "protein_coding"; transcript_name "SPAC977.15.1"; transcript_source "PomBase"; transcript_biotype "protein_coding"; exon_id "SPAC977.15.1:exon:1";
I	PomBase	CDS	62989	63732	.	+	0	gene_id "SPAC977.15"; transcript_id "SPAC977.15.1"; exon_number "1"; gene_name "SPAC977.15"; gene_source "PomBase"; gene_biotype "protein_coding"; transcript_name "SPAC977.15.1"; transcript_source "PomBase"; transcript_biotype "protein_coding"; protein_id "SPAC977.15.1:pep";
I	PomBase	start_codon	62989	62991	.	+	0	gene_id "SPAC977.15"; transcript_id "SPAC977.15.1"; exon_number "1"; gene_name "SPAC977.15"; gene_source "PomBase"; gene_biotype "protein_coding"; transcript_name "SPAC977.15.1"; transcript_source "PomBase"; transcript_biotype "protein_coding";
I	PomBase	five_prime_utr	62961	62988	.	+	.	gene_id "SPAC977.15"; transcript_id "SPAC977.15.1"; gene_name "SPAC977.15"; gene_source "PomBase"; gene_biotype "protein_coding"; transcript_name "SPAC977.15.1"; transcript_source "PomBase"; transcript_biotype "protein_coding";
I	PomBase	three_prime_utr	63733	63862	.	+	.	gene_id "SPAC977.15"; transcript_id "SPAC977.15.1"; gene_name "SPAC977.15"; gene_source "PomBase"; gene_biotype "protein_coding"; transcript_name "SPAC977.15.1"; transcript_source "PomBase"; transcript_biotype "protein_coding";
I	PomBase	gene	64559	66980	.	-	.	gene_id "SPAC977.16c"; gene_name "dak2"; gene_source "PomBase"; gene_biotype "protein_coding";
I	PomBase	transcript	64559	66980	.	-	.	gene_id "SPAC977.16c"; transcript_id "SPAC977.16c.1"; gene_name "dak2"; gene_source "PomBase"; gene_biotype "protein_coding"; transcript_name "dak2"; transcript_source "PomBase"; transcript_biotype "protein_coding";
I	PomBase	exon	66681	66980	.	-	.	gene_id "SPAC977.16c"; transcript_id "SPAC977.16c.1"; exon_number "1"; gene_name "dak2"; gene_source "PomBase"; gene_biotype "protein_coding"; transcript_name "dak2"; transcript_source "PomBase"; transcript_biotype "protein_coding"; exon_id "SPAC977.16c.1:five_prime_UTR:1";
I	PomBase	exon	64559	66679	.	-	.	gene_id "SPAC977.16c"; transcript_id "SPAC977.16c.1"; exon_number "2"; gene_name "dak2"; gene_source "PomBase"; gene_biotype "protein_coding"; transcript_name "dak2"; transcript_source "PomBase"; transcript_biotype "protein_coding"; exon_id "SPAC977.16c.1:exon:1";
I	PomBase	CDS	64907	66679	.	-	0	gene_id "SPAC977.16c"; transcript_id "SPAC977.16c.1"; exon_number "2"; gene_name "dak2"; gene_source "PomBase"; gene_biotype "protein_coding"; transcript_name "dak2"; transcript_source "PomBase"; transcript_biotype "protein_coding"; protein_id "SPAC977.16c.1:pep";
I	PomBase	start_codon	66677	66679	.	-	0	gene_id "SPAC977.16c"; transcript_id "SPAC977.16c.1"; exon_number "2"; gene_name "dak2"; gene_source "PomBase"; gene_biotype "protein_coding"; transcript_name "dak2"; transcript_source "PomBase"; transcript_biotype "protein_coding";
I	PomBase	stop_codon	64904	64906	.	-	0	gene_id "SPAC977.16c"; transcript_id "SPAC977.16c.1"; exon_number "2"; gene_name "dak2"; gene_source "PomBase"; gene_biotype "protein_coding"; transcript_name "dak2"; transcript_source "PomBase"; transcript_biotype "protein_coding";
I	PomBase	five_prime_utr	66681	66980	.	-	.	gene_id "SPAC977.16c"; transcript_id "SPAC977.16c.1"; gene_name "dak2"; gene_source "PomBase"; gene_biotype "protein_coding"; transcript_name "dak2"; transcript_source "PomBase"; transcript_biotype "protein_coding";
I	PomBase	three_prime_utr	64559	64903	.	-	.	gene_id "SPAC977.16c"; transcript_id "SPAC977.16c.1"; gene_name "dak2"; gene_source "PomBase"; gene_biotype "protein_coding"; transcript_name "dak2"; transcript_source "PomBase"; transcript_biotype "protein_coding";
I	PomBase	gene	66219	69821	.	+	.	gene_id "SPAC977.17"; gene_name "SPAC977.17"; gene_source "PomBase"; gene_biotype "protein_coding";
I	PomBase	transcript	66219	69821	.	+	.	gene_id "SPAC977.17"; transcript_id "SPAC977.17.1"; gene_name "SPAC977.17"; gene_source "PomBase"; gene_biotype "protein_coding"; transcript_name "SPAC977.17.1"; transcript_source "PomBase"; transcript_biotype "protein_coding";
I	PomBase	exon	66219	69821	.	+	.	gene_id "SPAC977.17"; transcript_id "SPAC977.17.1"; exon_number "1"; gene_name "SPAC977.17"; gene_source "PomBase"; gene_biotype "protein_coding"; transcript_name "SPAC977.17.1"; transcript_source "PomBase"; transcript_biotype "protein_coding"; exon_id "SPAC977.17.1:exon:1";
I	PomBase	CDS	67143	68936	.	+	0	gene_id "SPAC977.17"; transcript_id "SPAC977.17.1"; exon_number "1"; gene_name "SPAC977.17"; gene_source "PomBase"; gene_biotype "protein_coding"; transcript_name "SPAC977.17.1"; transcript_source "PomBase"; transcript_biotype "protein_coding"; protein_id "SPAC977.17.1:pep";
I	PomBase	start_codon	67143	67145	.	+	0	gene_id "SPAC977.17"; transcript_id "SPAC977.17.1"; exon_number "1"; gene_name "SPAC977.17"; gene_source "PomBase"; gene_biotype "protein_coding"; transcript_name "SPAC977.17.1"; transcript_source "PomBase"; transcript_biotype "protein_coding";
I	PomBase	stop_codon	68937	68939	.	+	0	gene_id "SPAC977.17"; transcript_id "SPAC977.17.1"; exon_number "1"; gene_name "SPAC977.17"; gene_source "PomBase"; gene_biotype "protein_coding"; transcript_name "SPAC977.17.1"; transcript_source "PomBase"; transcript_biotype "protein_coding";
I	PomBase	five_prime_utr	66219	67142	.	+	.	gene_id "SPAC977.17"; transcript_id "SPAC977.17.1"; gene_name "SPAC977.17"; gene_source "PomBase"; gene_biotype "protein_coding"; transcript_name "SPAC977.17.1"; transcript_source "PomBase"; transcript_biotype "protein_coding";
I	PomBase	three_prime_utr	68940	69821	.	+	.	gene_id "SPAC977.17"; transcript_id "SPAC977.17.1"; gene_name "SPAC977.17"; gene_source "PomBase"; gene_biotype "protein_coding"; transcript_name "SPAC977.17.1"; transcript_source "PomBase"; transcript_biotype "protein_coding";
I	PomBase	gene	71030	71470	.	+	.	gene_id "SPNCRNA.137"; gene_name "SPNCRNA.137"; gene_source "PomBase"; gene_biotype "ncRNA";
I	PomBase	transcript	71030	71470	.	+	.	gene_id "SPNCRNA.137"; transcript_id "SPNCRNA.137.1"; gene_name "SPNCRNA.137"; gene_source "PomBase"; gene_biotype "ncRNA"; transcript_name "SPNCRNA.137.1"; transcript_source "PomBase"; transcript_biotype "ncRNA";
I	PomBase	exon	71030	71470	.	+	.	gene_id "SPNCRNA.137"; transcript_id "SPNCRNA.137.1"; exon_number "1"; gene_name "SPNCRNA.137"; gene_source "PomBase"; gene_biotype "ncRNA"; transcript_name "SPNCRNA.137.1"; transcript_source "PomBase"; transcript_biotype "ncRNA"; exon_id "SPNCRNA.137.1:exon:1";
I	PomBase	gene	71982	72380	.	-	.	gene_id "SPNCRNA.37"; gene_name "prl37"; gene_source "PomBase"; gene_biotype "ncRNA";
I	PomBase	transcript	71982	72380	.	-	.	gene_id "SPNCRNA.37"; transcript_id "SPNCRNA.37.1"; gene_name "prl37"; gene_source "PomBase"; gene_biotype "ncRNA"; transcript_name "prl37"; transcript_source "PomBase"; transcript_biotype "ncRNA";
I	PomBase	exon	71982	72380	.	-	.	gene_id "SPNCRNA.37"; transcript_id "SPNCRNA.37.1"; exon_number "1"; gene_name "prl37"; gene_source "PomBase"; gene_biotype "ncRNA"; transcript_name "prl37"; transcript_source "PomBase"; transcript_biotype "ncRNA"; exon_id "SPNCRNA.37.1:exon:1";
I	PomBase	gene	74452	76721	.	-	.	gene_id "SPAPJ695.02"; gene_name "SPAPJ695.02"; gene_source "PomBase"; gene_biotype "protein_coding";
I	PomBase	transcript	74452	76721	.	-	.	gene_id "SPAPJ695.02"; transcript_id "SPAPJ695.02.1"; gene_name "SPAPJ695.02"; gene_source "PomBase"; gene_biotype "protein_coding"; transcript_name "SPAPJ695.02.1"; transcript_source "PomBase"; transcript_biotype "protein_coding";
I	PomBase	exon	74452	76721	.	-	.	gene_id "SPAPJ695.02"; transcript_id "SPAPJ695.02.1"; exon_number "1"; gene_name "SPAPJ695.02"; gene_source "PomBase"; gene_biotype "protein_coding"; transcript_name "SPAPJ695.02.1"; transcript_source "PomBase"; transcript_biotype "protein_coding"; exon_id "SPAPJ695.02.1:exon:1";
I	PomBase	CDS	75698	75910	.	-	0	gene_id "SPAPJ695.02"; transcript_id "SPAPJ695.02.1"; exon_number "1"; gene_name "SPAPJ695.02"; gene_source "PomBase"; gene_biotype "protein_coding"; transcript_name "SPAPJ695.02.1"; transcript_source "PomBase"; transcript_biotype "protein_coding"; protein_id "SPAPJ695.02.1:pep";
I	PomBase	start_codon	75908	75910	.	-	0	gene_id "SPAPJ695.02"; transcript_id "SPAPJ695.02.1"; exon_number "1"; gene_name "SPAPJ695.02"; gene_source "PomBase"; gene_biotype "protein_coding"; transcript_name "SPAPJ695.02.1"; transcript_source "PomBase"; transcript_biotype "protein_coding";
I	PomBase	five_prime_utr	75911	76721	.	-	.	gene_id "SPAPJ695.02"; transcript_id "SPAPJ695.02.1"; gene_name "SPAPJ695.02"; gene_source "PomBase"; gene_biotype "protein_coding"; transcript_name "SPAPJ695.02.1"; transcript_source "PomBase"; transcript_biotype "protein_coding";
I	PomBase	three_prime_utr	74452	75697	.	-	.	gene_id "SPAPJ695.02"; transcript_id "SPAPJ695.02.1"; gene_name "SPAPJ695.02"; gene_source "PomBase"; gene_biotype "protein_coding"; transcript_name "SPAPJ695.02.1"; transcript_source "PomBase"; transcript_biotype "protein_coding";
I	PomBase	gene	77480	78066	.	-	.	gene_id "SPAPJ695.01c"; gene_name "SPAPJ695.01c"; gene_source "PomBase"; gene_biotype "protein_coding";
I	PomBase	transcript	77480	78066	.	-	.	gene_id "SPAPJ695.01c"; transcript_id "SPAPJ695.01c.1"; gene_name "SPAPJ695.01c"; gene_source "PomBase"; gene_biotype "protein_coding"; transcript_name "SPAPJ695.01c.1"; transcript_source "PomBase"; transcript_biotype "protein_coding";
I	PomBase	exon	77480	78066	.	-	.	gene_id "SPAPJ695.01c"; transcript_id "SPAPJ695.01c.1"; exon_number "1"; gene_name "SPAPJ695.01c"; gene_source "PomBase"; gene_biotype "protein_coding"; transcript_name "SPAPJ695.01c.1"; transcript_source "PomBase"; transcript_biotype "protein_coding"; exon_id "SPAPJ695.01c.1:exon:1";
I	PomBase	CDS	77578	77931	.	-	0	gene_id "SPAPJ695.01c"; transcript_id "SPAPJ695.01c.1"; exon_number "1"; gene_name "SPAPJ695.01c"; gene_source "PomBase"; gene_biotype "protein_coding"; transcript_name "SPAPJ695.01c.1"; transcript_source "PomBase"; transcript_biotype "protein_coding"; protein_id "SPAPJ695.01c.1:pep";
I	PomBase	start_codon	77929	77931	.	-	0	gene_id "SPAPJ695.01c"; transcript_id "SPAPJ695.01c.1"; exon_number "1"; gene_name "SPAPJ695.01c"; gene_source "PomBase"; gene_biotype "protein_coding"; transcript_name "SPAPJ695.01c.1"; transcript_source "PomBase"; transcript_biotype "protein_coding";
I	PomBase	five_prime_utr	77932	78066	.	-	.	gene_id "SPAPJ695.01c"; transcript_id "SPAPJ695.01c.1"; gene_name "SPAPJ695.01c"; gene_source "PomBase"; gene_biotype "protein_coding"; transcript_name "SPAPJ695.01c.1"; transcript_source "PomBase"; transcript_biotype "protein_coding";
I	PomBase	three_prime_utr	77480	77577	.	-	.	gene_id "SPAPJ695.01c"; transcript_id "SPAPJ695.01c.1"; gene_name "SPAPJ695.01c"; gene_source "PomBase"; gene_biotype "protein_coding"; transcript_name "SPAPJ695.01c.1"; transcript_source "PomBase"; transcript_biotype "protein_coding";
I	PomBase	gene	79209	79317	.	+	.	gene_id "SPNCRNA.138"; gene_name "SPNCRNA.138"; gene_source "PomBase"; gene_biotype "ncRNA";
I	PomBase	transcript	79209	79317	.	+	.	gene_id "SPNCRNA.138"; transcript_id "SPNCRNA.138.1"; gene_name "SPNCRNA.138"; gene_source "PomBase"; gene_biotype "ncRNA"; transcript_name "SPNCRNA.138.1"; transcript_source "PomBase"; transcript_biotype "ncRNA";
I	PomBase	exon	79209	79317	.	+	.	gene_id "SPNCRNA.138"; transcript_id "SPNCRNA.138.1"; exon_number "1"; gene_name "SPNCRNA.138"; gene_source "PomBase"; gene_biotype "ncRNA"; transcript_name "SPNCRNA.138.1"; transcript_source "PomBase"; transcript_biotype "ncRNA"; exon_id "SPNCRNA.138.1:exon:1";
I	PomBase	gene	81468	82345	.	-	.	gene_id "SPNCRNA.603"; gene_name "SPNCRNA.603"; gene_source "PomBase"; gene_biotype "ncRNA";
I	PomBase	transcript	81468	82345	.	-	.	gene_id "SPNCRNA.603"; transcript_id "SPNCRNA.603.1"; gene_name "SPNCRNA.603"; gene_source "PomBase"; gene_biotype "ncRNA"; transcript_name "SPNCRNA.603.1"; transcript_source "PomBase"; transcript_biotype "ncRNA";
I	PomBase	exon	81468	82345	.	-	.	gene_id "SPNCRNA.603"; transcript_id "SPNCRNA.603.1"; exon_number "1"; gene_name "SPNCRNA.603"; gene_source "PomBase"; gene_biotype "ncRNA"; transcript_name "SPNCRNA.603.1"; transcript_source "PomBase"; transcript_biotype "ncRNA"; exon_id "SPNCRNA.603.1:exon:1";
I	PomBase	gene	82746	84786	.	+	.	gene_id "SPAC1F8.01"; gene_name "ght3"; gene_source "PomBase"; gene_biotype "protein_coding";
I	PomBase	transcript	82746	84786	.	+	.	gene_id "SPAC1F8.01"; transcript_id "SPAC1F8.01.1"; gene_name "ght3"; gene_source "PomBase"; gene_biotype "protein_coding"; transcript_name "ght3"; transcript_source "PomBase"; transcript_biotype "protein_coding";
I	PomBase	exon	82746	84786	.	+	.	gene_id "SPAC1F8.01"; transcript_id "SPAC1F8.01.1"; exon_number "1"; gene_name "ght3"; gene_source "PomBase"; gene_biotype "protein_coding"; transcript_name "ght3"; transcript_source "PomBase"; transcript_biotype "protein_coding"; exon_id "SPAC1F8.01.1:exon:1";
I	PomBase	CDS	82936	84600	.	+	0	gene_id "SPAC1F8.01"; transcript_id "SPAC1F8.01.1"; exon_number "1"; gene_name "ght3"; gene_source "PomBase"; gene_biotype "protein_coding"; transcript_name "ght3"; transcript_source "PomBase"; transcript_biotype "protein_coding"; protein_id "SPAC1F8.01.1:pep";
I	PomBase	start_codon	82936	82938	.	+	0	gene_id "SPAC1F8.01"; transcript_id "SPAC1F8.01.1"; exon_number "1"; gene_name "ght3"; gene_source "PomBase"; gene_biotype "protein_coding"; transcript_name "ght3"; transcript_source "PomBase"; transcript_biotype "protein_coding";
I	PomBase	stop_codon	84601	84603	.	+	0	gene_id "SPAC1F8.01"; transcript_id "SPAC1F8.01.1"; exon_number "1"; gene_name "ght3"; gene_source "PomBase"; gene_biotype "protein_coding"; transcript_name "ght3"; transcript_source "PomBase"; transcript_biotype "protein_coding";
I	PomBase	five_prime_utr	82746	82935	.	+	.	gene_id "SPAC1F8.01"; transcript_id "SPAC1F8.01.1"; gene_name "ght3"; gene_source "PomBase"; gene_biotype "protein_coding"; transcript_name "ght3"; transcript_source "PomBase"; transcript_biotype "protein_coding";
I	PomBase	three_prime_utr	84604	84786	.	+	.	gene_id "SPAC1F8.01"; transcript_id "SPAC1F8.01.1"; gene_name "ght3"; gene_source "PomBase"; gene_biotype "protein_coding"; transcript_name "ght3"; transcript_source "PomBase"; transcript_biotype "protein_coding";
I	PomBase	gene	85566	86324	.	-	.	gene_id "SPAC1F8.02c"; gene_name "shu1"; gene_source "PomBase"; gene_biotype "protein_coding";
I	PomBase	transcript	85566	86324	.	-	.	gene_id "SPAC1F8.02c"; transcript_id "SPAC1F8.02c.1"; gene_name "shu1"; gene_source "PomBase"; gene_biotype "protein_coding"; transcript_name "shu1"; transcript_source "PomBase"; transcript_biotype "protein_coding";
I	PomBase	exon	85566	86324	.	-	.	gene_id "SPAC1F8.02c"; transcript_id "SPAC1F8.02c.1"; exon_number "1"; gene_name "shu1"; gene_source "PomBase"; gene_biotype "protein_coding"; transcript_name "shu1"; transcript_source "PomBase"; transcript_biotype "protein_coding"; exon_id "SPAC1F8.02c.1:exon:1";
I	PomBase	CDS	85598	86278	.	-	0	gene_id "SPAC1F8.02c"; transcript_id "SPAC1F8.02c.1"; exon_number "1"; gene_name "shu1"; gene_source "PomBase"; gene_biotype "protein_coding"; transcript_name "shu1"; transcript_source "PomBase"; transcript_biotype "protein_coding"; protein_id "SPAC1F8.02c.1:pep";
I	PomBase	start_codon	86276	86278	.	-	0	gene_id "SPAC1F8.02c"; transcript_id "SPAC1F8.02c.1"; exon_number "1"; gene_name "shu1"; gene_source "PomBase"; gene_biotype "protein_coding"; transcript_name "shu1"; transcript_source "PomBase"; transcript_biotype "protein_coding";
I	PomBase	five_prime_utr	86279	86324	.	-	.	gene_id "SPAC1F8.02c"; transcript_id "SPAC1F8.02c.1"; gene_name "shu1"; gene_source "PomBase"; gene_biotype "protein_coding"; transcript_name "shu1"; transcript_source "PomBase"; transcript_biotype "protein_coding";
I	PomBase	three_prime_utr	85566	85597	.	-	.	gene_id "SPAC1F8.02c"; transcript_id "SPAC1F8.02c.1"; gene_name "shu1"; gene_source "PomBase"; gene_biotype "protein_coding"; transcript_name "shu1"; transcript_source "PomBase"; transcript_biotype "protein_coding";
I	PomBase	gene	88201	90300	.	-	.	gene_id "SPAC1F8.03c"; gene_name "str3"; gene_source "PomBase"; gene_biotype "protein_coding";
I	PomBase	transcript	88201	90300	.	-	.	gene_id "SPAC1F8.03c"; transcript_id "SPAC1F8.03c.1"; gene_name "str3"; gene_source "PomBase"; gene_biotype "protein_coding"; transcript_name "str3"; transcript_source "PomBase"; transcript_biotype "protein_coding";
I	PomBase	exon	88201	90300	.	-	.	gene_id "SPAC1F8.03c"; transcript_id "SPAC1F8.03c.1"; exon_number "1"; gene_name "str3"; gene_source "PomBase"; gene_biotype "protein_coding"; transcript_name "str3"; transcript_source "PomBase"; transcript_biotype "protein_coding"; exon_id "SPAC1F8.03c.1:exon:1";
I	PomBase	CDS	88367	90259	.	-	0	gene_id "SPAC1F8.03c"; transcript_id "SPAC1F8.03c.1"; exon_number "1"; gene_name "str3"; gene_source "PomBase"; gene_biotype "protein_coding"; transcript_name "str3"; transcript_source "PomBase"; transcript_biotype "protein_coding"; protein_id "SPAC1F8.03c.1:pep";
I	PomBase	start_codon	90257	90259	.	-	0	gene_id "SPAC1F8.03c"; transcript_id "SPAC1F8.03c.1"; exon_number "1"; gene_name "str3"; gene_source "PomBase"; gene_biotype "protein_coding"; transcript_name "str3"; transcript_source "PomBase"; transcript_biotype "protein_coding";
I	PomBase	five_prime_utr	90260	90300	.	-	.	gene_id "SPAC1F8.03c"; transcript_id "SPAC1F8.03c.1"; gene_name "str3"; gene_source "PomBase"; gene_biotype "protein_coding"; transcript_name "str3"; transcript_source "PomBase"; transcript_biotype "protein_coding";
I	PomBase	three_prime_utr	88201	88366	.	-	.	gene_id "SPAC1F8.03c"; transcript_id "SPAC1F8.03c.1"; gene_name "str3"; gene_source "PomBase"; gene_biotype "protein_coding"; transcript_name "str3"; transcript_source "PomBase"; transcript_biotype "protein_coding";
I	PomBase	gene	90681	91753	.	-	.	gene_id "SPNCRNA.604"; gene_name "SPNCRNA.604"; gene_source "PomBase"; gene_biotype "ncRNA";
I	PomBase	transcript	90681	91753	.	-	.	gene_id "SPNCRNA.604"; transcript_id "SPNCRNA.604.1"; gene_name "SPNCRNA.604"; gene_source "PomBase"; gene_biotype "ncRNA"; transcript_name "SPNCRNA.604.1"; transcript_source "PomBase"; transcript_biotype "ncRNA";
I	PomBase	exon	90681	91753	.	-	.	gene_id "SPNCRNA.604"; transcript_id "SPNCRNA.604.1"; exon_number "1"; gene_name "SPNCRNA.604"; gene_source "PomBase"; gene_biotype "ncRNA"; transcript_name "SPNCRNA.604.1"; transcript_source "PomBase"; transcript_biotype "ncRNA"; exon_id "SPNCRNA.604.1:exon:1";
I	PomBase	gene	90868	91753	.	+	.	gene_id "SPNCRNA.139"; gene_name "SPNCRNA.139"; gene_source "PomBase"; gene_biotype "ncRNA";
I	PomBase	transcript	90868	91753	.	+	.	gene_id "SPNCRNA.139"; transcript_id "SPNCRNA.139.1"; gene_name "SPNCRNA.139"; gene_source "PomBase"; gene_biotype "ncRNA"; transcript_name "SPNCRNA.139.1"; transcript_source "PomBase"; transcript_biotype "ncRNA";
I	PomBase	exon	90868	91753	.	+	.	gene_id "SPNCRNA.139"; transcript_id "SPNCRNA.139.1"; exon_number "1"; gene_name "SPNCRNA.139"; gene_source "PomBase"; gene_biotype "ncRNA"; transcript_name "SPNCRNA.139.1"; transcript_source "PomBase"; transcript_biotype "ncRNA"; exon_id "SPNCRNA.139.1:exon:1";
I	PomBase	gene	90949	94038	.	+	.	gene_id "SPNCRNA.605"; gene_name "SPAC1F8.04c-antisense-1"; gene_source "PomBase"; gene_biotype "ncRNA";
I	PomBase	transcript	90949	94038	.	+	.	gene_id "SPNCRNA.605"; transcript_id "SPNCRNA.605.1"; gene_name "SPAC1F8.04c-antisense-1"; gene_source "PomBase"; gene_biotype "ncRNA"; transcript_name "SPAC1F8.04c-antisense-1"; transcript_source "PomBase"; transcript_biotype "ncRNA";
I	PomBase	exon	90949	94038	.	+	.	gene_id "SPNCRNA.605"; transcript_id "SPNCRNA.605.1"; exon_number "1"; gene_name "SPAC1F8.04c-antisense-1"; gene_source "PomBase"; gene_biotype "ncRNA"; transcript_name "SPAC1F8.04c-antisense-1"; transcript_source "PomBase"; transcript_biotype "ncRNA"; exon_id "SPNCRNA.605.1:exon:1";
I	PomBase	gene	92387	93931	.	-	.	gene_id "SPAC1F8.04c"; gene_name "SPAC1F8.04c"; gene_source "PomBase"; gene_biotype "protein_coding";
I	PomBase	transcript	92387	93931	.	-	.	gene_id "SPAC1F8.04c"; transcript_id "SPAC1F8.04c.1"; gene_name "SPAC1F8.04c"; gene_source "PomBase"; gene_biotype "protein_coding"; transcript_name "SPAC1F8.04c.1"; transcript_source "PomBase"; transcript_biotype "protein_coding";
I	PomBase	exon	92387	93931	.	-	.	gene_id "SPAC1F8.04c"; transcript_id "SPAC1F8.04c.1"; exon_number "1"; gene_name "SPAC1F8.04c"; gene_source "PomBase"; gene_biotype "protein_coding"; transcript_name "SPAC1F8.04c.1"; transcript_source "PomBase"; transcript_biotype "protein_coding"; exon_id "SPAC1F8.04c.1:exon:1";
I	PomBase	CDS	92483	93871	.	-	0	gene_id "SPAC1F8.04c"; transcript_id "SPAC1F8.04c.1"; exon_number "1"; gene_name "SPAC1F8.04c"; gene_source "PomBase"; gene_biotype "protein_coding"; transcript_name "SPAC1F8.04c.1"; transcript_source "PomBase"; transcript_biotype "protein_coding"; protein_id "SPAC1F8.04c.1:pep";
I	PomBase	start_codon	93869	93871	.	-	0	gene_id "SPAC1F8.04c"; transcript_id "SPAC1F8.04c.1"; exon_number "1"; gene_name "SPAC1F8.04c"; gene_source "PomBase"; gene_biotype "protein_coding"; transcript_name "SPAC1F8.04c.1"; transcript_source "PomBase"; transcript_biotype "protein_coding";
I	PomBase	stop_codon	92480	92482	.	-	0	gene_id "SPAC1F8.04c"; transcript_id "SPAC1F8.04c.1"; exon_number "1"; gene_name "SPAC1F8.04c"; gene_source "PomBase"; gene_biotype "protein_coding"; transcript_name "SPAC1F8.04c.1"; transcript_source "PomBase"; transcript_biotype "protein_coding";
I	PomBase	five_prime_utr	93872	93931	.	-	.	gene_id "SPAC1F8.04c"; transcript_id "SPAC1F8.04c.1"; gene_name "SPAC1F8.04c"; gene_source "PomBase"; gene_biotype "protein_coding"; transcript_name "SPAC1F8.04c.1"; transcript_source "PomBase"; transcript_biotype "protein_coding";
I	PomBase	three_prime_utr	92387	92479	.	-	.	gene_id "SPAC1F8.04c"; transcript_id "SPAC1F8.04c.1"; gene_name "SPAC1F8.04c"; gene_source "PomBase"; gene_biotype "protein_coding"; transcript_name "SPAC1F8.04c.1"; transcript_source "PomBase"; transcript_biotype "protein_coding";
I	PomBase	gene	95159	96525	.	-	.	gene_id "SPNCRNA.606"; gene_name "isp3-antisense-1"; gene_source "PomBase"; gene_biotype "ncRNA";
I	PomBase	transcript	95159	96525	.	-	.	gene_id "SPNCRNA.606"; transcript_id "SPNCRNA.606.1"; gene_name "isp3-antisense-1"; gene_source "PomBase"; gene_biotype "ncRNA"; transcript_name "isp3-antisense-1"; transcript_source "PomBase"; transcript_biotype "ncRNA";
I	PomBase	exon	95159	96525	.	-	.	gene_id "SPNCRNA.606"; transcript_id "SPNCRNA.606.1"; exon_number "1"; gene_name "isp3-antisense-1"; gene_source "PomBase"; gene_biotype "ncRNA"; transcript_name "isp3-antisense-1"; transcript_source "PomBase"; transcript_biotype "ncRNA"; exon_id "SPNCRNA.606.1:exon:1";
I	PomBase	gene	95961	96966	.	+	.	gene_id "SPAC1F8.05"; gene_name "isp3"; gene_source "PomBase"; gene_biotype "protein_coding";
I	PomBase	transcript	95961	96966	.	+	.	gene_id "SPAC1F8.05"; transcript_id "SPAC1F8.05.1"; gene_name "isp3"; gene_source "PomBase"; gene_biotype "protein_coding"; transcript_name "isp3"; transcript_source "PomBase"; transcript_biotype "protein_coding";
I	PomBase	exon	95961	96966	.	+	.	gene_id "SPAC1F8.05"; transcript_id "SPAC1F8.05.1"; exon_number "1"; gene_name "isp3"; gene_source "PomBase"; gene_biotype "protein_coding"; transcript_name "isp3"; transcript_source "PomBase"; transcript_biotype "protein_coding"; exon_id "SPAC1F8.05.1:exon:1";
I	PomBase	CDS	96000	96548	.	+	0	gene_id "SPAC1F8.05"; transcript_id "SPAC1F8.05.1"; exon_number "1"; gene_name "isp3"; gene_source "PomBase"; gene_biotype "protein_coding"; transcript_name "isp3"; transcript_source "PomBase"; transcript_biotype "protein_coding"; protein_id "SPAC1F8.05.1:pep";
I	PomBase	start_codon	96000	96002	.	+	0	gene_id "SPAC1F8.05"; transcript_id "SPAC1F8.05.1"; exon_number "1"; gene_name "isp3"; gene_source "PomBase"; gene_biotype "protein_coding"; transcript_name "isp3"; transcript_source "PomBase"; transcript_biotype "protein_coding";
I	PomBase	five_prime_utr	95961	95999	.	+	.	gene_id "SPAC1F8.05"; transcript_id "SPAC1F8.05.1"; gene_name "isp3"; gene_source "PomBase"; gene_biotype "protein_coding"; transcript_name "isp3"; transcript_source "PomBase"; transcript_biotype "protein_coding";
I	PomBase	three_prime_utr	96549	96966	.	+	.	gene_id "SPAC1F8.05"; transcript_id "SPAC1F8.05.1"; gene_name "isp3"; gene_source "PomBase"; gene_biotype "protein_coding"; transcript_name "isp3"; transcript_source "PomBase"; transcript_biotype "protein_coding";
I	PomBase	gene	99046	101140	.	-	.	gene_id "SPNCRNA.607"; gene_name "fta5-antisense-1"; gene_source "PomBase"; gene_biotype "ncRNA";
I	PomBase	transcript	99046	101140	.	-	.	gene_id "SPNCRNA.607"; transcript_id "SPNCRNA.607.1"; gene_name "fta5-antisense-1"; gene_source "PomBase"; gene_biotype "ncRNA"; transcript_name "fta5-antisense-1"; transcript_source "PomBase"; transcript_biotype "ncRNA";
I	PomBase	exon	99046	101140	.	-	.	gene_id "SPNCRNA.607"; transcript_id "SPNCRNA.607.1"; exon_number "1"; gene_name "fta5-antisense-1"; gene_source "PomBase"; gene_biotype "ncRNA"; transcript_name "fta5-antisense-1"; transcript_source "PomBase"; transcript_biotype "ncRNA"; exon_id "SPNCRNA.607.1:exon:1";
I	PomBase	gene	99871	101431	.	+	.	gene_id "SPAC1F8.06"; gene_name "fta5"; gene_source "PomBase"; gene_biotype "protein_coding";
I	PomBase	transcript	99871	101431	.	+	.	gene_id "SPAC1F8.06"; transcript_id "SPAC1F8.06.1"; gene_name "fta5"; gene_source "PomBase"; gene_biotype "protein_coding"; transcript_name "fta5"; transcript_source "PomBase"; transcript_biotype "protein_coding";
I	PomBase	exon	99871	101431	.	+	.	gene_id "SPAC1F8.06"; transcript_id "SPAC1F8.06.1"; exon_number "1"; gene_name "fta5"; gene_source "PomBase"; gene_biotype "protein_coding"; transcript_name "fta5"; transcript_source "PomBase"; transcript_biotype "protein_coding"; exon_id "SPAC1F8.06.1:exon:1";
I	PomBase	CDS	100011	101168	.	+	0	gene_id "SPAC1F8.06"; transcript_id "SPAC1F8.06.1"; exon_number "1"; gene_name "fta5"; gene_source "PomBase"; gene_biotype "protein_coding"; transcript_name "fta5"; transcript_source "PomBase"; transcript_biotype "protein_coding"; protein_id "SPAC1F8.06.1:pep";
I	PomBase	start_codon	100011	100013	.	+	0	gene_id "SPAC1F8.06"; transcript_id "SPAC1F8.06.1"; exon_number "1"; gene_name "fta5"; gene_source "PomBase"; gene_biotype "protein_coding"; transcript_name "fta5"; transcript_source "PomBase"; transcript_biotype "protein_coding";
I	PomBase	five_prime_utr	99871	100010	.	+	.	gene_id "SPAC1F8.06"; transcript_id "SPAC1F8.06.1"; gene_name "fta5"; gene_source "PomBase"; gene_biotype "protein_coding"; transcript_name "fta5"; transcript_source "PomBase"; transcript_biotype "protein_coding";
I	PomBase	three_prime_utr	101169	101431	.	+	.	gene_id "SPAC1F8.06"; transcript_id "SPAC1F8.06.1"; gene_name "fta5"; gene_source "PomBase"; gene_biotype "protein_coding"; transcript_name "fta5"; transcript_source "PomBase"; transcript_biotype "protein_coding";
I	PomBase	gene	101715	103594	.	-	.	gene_id "SPAC1F8.07c"; gene_name "pdc101"; gene_source "PomBase"; gene_biotype "protein_coding";
I	PomBase	transcript	101715	103594	.	-	.	gene_id "SPAC1F8.07c"; transcript_id "SPAC1F8.07c.1"; gene_name "pdc101"; gene_source "PomBase"; gene_biotype "protein_coding"; transcript_name "pdc101"; transcript_source "PomBase"; transcript_biotype "protein_coding";
I	PomBase	exon	101872	103594	.	-	.	gene_id "SPAC1F8.07c"; transcript_id "SPAC1F8.07c.1"; exon_number "1"; gene_name "pdc101"; gene_source "PomBase"; gene_biotype "protein_coding"; transcript_name "pdc101"; transcript_source "PomBase"; transcript_biotype "protein_coding"; exon_id "SPAC1F8.07c.1:exon:1";
I	PomBase	CDS	101872	103544	.	-	0	gene_id "SPAC1F8.07c"; transcript_id "SPAC1F8.07c.1"; exon_number "1"; gene_name "pdc101"; gene_source "PomBase"; gene_biotype "protein_coding"; transcript_name "pdc101"; transcript_source "PomBase"; transcript_biotype "protein_coding"; protein_id "SPAC1F8.07c.1:pep";
I	PomBase	start_codon	103542	103544	.	-	0	gene_id "SPAC1F8.07c"; transcript_id "SPAC1F8.07c.1"; exon_number "1"; gene_name "pdc101"; gene_source "PomBase"; gene_biotype "protein_coding"; transcript_name "pdc101"; transcript_source "PomBase"; transcript_biotype "protein_coding";
I	PomBase	exon	101715	101869	.	-	.	gene_id "SPAC1F8.07c"; transcript_id "SPAC1F8.07c.1"; exon_number "2"; gene_name "pdc101"; gene_source "PomBase"; gene_biotype "protein_coding"; transcript_name "pdc101"; transcript_source "PomBase"; transcript_biotype "protein_coding"; exon_id "SPAC1F8.07c.1:exon:2";
I	PomBase	CDS	101836	101869	.	-	1	gene_id "SPAC1F8.07c"; transcript_id "SPAC1F8.07c.1"; exon_number "2"; gene_name "pdc101"; gene_source "PomBase"; gene_biotype "protein_coding"; transcript_name "pdc101"; transcript_source "PomBase"; transcript_biotype "protein_coding"; protein_id "SPAC1F8.07c.1:pep";
I	PomBase	five_prime_utr	103545	103594	.	-	.	gene_id "SPAC1F8.07c"; transcript_id "SPAC1F8.07c.1"; gene_name "pdc101"; gene_source "PomBase"; gene_biotype "protein_coding"; transcript_name "pdc101"; transcript_source "PomBase"; transcript_biotype "protein_coding";
I	PomBase	three_prime_utr	101715	101835	.	-	.	gene_id "SPAC1F8.07c"; transcript_id "SPAC1F8.07c.1"; gene_name "pdc101"; gene_source "PomBase"; gene_biotype "protein_coding"; transcript_name "pdc101"; transcript_source "PomBase"; transcript_biotype "protein_coding";
I	PomBase	gene	103941	104953	.	+	.	gene_id "SPAC1F8.08"; gene_name "SPAC1F8.08"; gene_source "PomBase"; gene_biotype "protein_coding";
I	PomBase	transcript	103941	104953	.	+	.	gene_id "SPAC1F8.08"; transcript_id "SPAC1F8.08.1"; gene_name "SPAC1F8.08"; gene_source "PomBase"; gene_biotype "protein_coding"; transcript_name "SPAC1F8.08.1"; transcript_source "PomBase"; transcript_biotype "protein_coding";
I	PomBase	exon	103941	104953	.	+	.	gene_id "SPAC1F8.08"; transcript_id "SPAC1F8.08.1"; exon_number "1"; gene_name "SPAC1F8.08"; gene_source "PomBase"; gene_biotype "protein_coding"; transcript_name "SPAC1F8.08.1"; transcript_source "PomBase"; transcript_biotype "protein_coding"; exon_id "SPAC1F8.08.1:exon:1";
I	PomBase	CDS	103941	104303	.	+	0	gene_id "SPAC1F8.08"; transcript_id "SPAC1F8.08.1"; exon_number "1"; gene_name "SPAC1F8.08"; gene_source "PomBase"; gene_biotype "protein_coding"; transcript_name "SPAC1F8.08.1"; transcript_source "PomBase"; transcript_biotype "protein_coding"; protein_id "SPAC1F8.08.1:pep";
I	PomBase	start_codon	103941	103943	.	+	0	gene_id "SPAC1F8.08"; transcript_id "SPAC1F8.08.1"; exon_number "1"; gene_name "SPAC1F8.08"; gene_source "PomBase"; gene_biotype "protein_coding"; transcript_name "SPAC1F8.08.1"; transcript_source "PomBase"; transcript_biotype "protein_coding";
I	PomBase	three_prime_utr	104304	104953	.	+	.	gene_id "SPAC1F8.08"; transcript_id "SPAC1F8.08.1"; gene_name "SPAC1F8.08"; gene_source "PomBase"; gene_biotype "protein_coding"; transcript_name "SPAC1F8.08.1"; transcript_source "PomBase"; transcript_biotype "protein_coding";
I	PomBase	gene	106893	108361	.	+	.	gene_id "SPAC11D3.19"; gene_name "SPAC11D3.19"; gene_source "PomBase"; gene_biotype "protein_coding";
I	PomBase	transcript	106893	108361	.	+	.	gene_id "SPAC11D3.19"; transcript_id "SPAC11D3.19.1"; gene_name "SPAC11D3.19"; gene_source "PomBase"; gene_biotype "protein_coding"; transcript_name "SPAC11D3.19.1"; transcript_source "PomBase"; transcript_biotype "protein_coding";
I	PomBase	exon	106893	108361	.	+	.	gene_id "SPAC11D3.19"; transcript_id "SPAC11D3.19.1"; exon_number "1"; gene_name "SPAC11D3.19"; gene_source "PomBase"; gene_biotype "protein_coding"; transcript_name "SPAC11D3.19.1"; transcript_source "PomBase"; transcript_biotype "protein_coding"; exon_id "SPAC11D3.19.1:exon:1";
I	PomBase	CDS	106965	107198	.	+	0	gene_id "SPAC11D3.19"; transcript_id "SPAC11D3.19.1"; exon_number "1"; gene_name "SPAC11D3.19"; gene_source "PomBase"; gene_biotype "protein_coding"; transcript_name "SPAC11D3.19.1"; transcript_source "PomBase"; transcript_biotype "protein_coding"; protein_id "SPAC11D3.19.1:pep";
I	PomBase	start_codon	106965	106967	.	+	0	gene_id "SPAC11D3.19"; transcript_id "SPAC11D3.19.1"; exon_number "1"; gene_name "SPAC11D3.19"; gene_source "PomBase"; gene_biotype "protein_coding"; transcript_name "SPAC11D3.19.1"; transcript_source "PomBase"; transcript_biotype "protein_coding";
I	PomBase	five_prime_utr	106893	106964	.	+	.	gene_id "SPAC11D3.19"; transcript_id "SPAC11D3.19.1"; gene_name "SPAC11D3.19"; gene_source "PomBase"; gene_biotype "protein_coding"; transcript_name "SPAC11D3.19.1"; transcript_source "PomBase"; transcript_biotype "protein_coding";
I	PomBase	three_prime_utr	107199	108361	.	+	.	gene_id "SPAC11D3.19"; transcript_id "SPAC11D3.19.1"; gene_name "SPAC11D3.19"; gene_source "PomBase"; gene_biotype "protein_coding"; transcript_name "SPAC11D3.19.1"; transcript_source "PomBase"; transcript_biotype "protein_coding";
I	PomBase	gene	108732	109195	.	-	.	gene_id "SPAC11D3.01c"; gene_name "SPAC11D3.01c"; gene_source "PomBase"; gene_biotype "protein_coding";
I	PomBase	transcript	108732	109195	.	-	.	gene_id "SPAC11D3.01c"; transcript_id "SPAC11D3.01c.1"; gene_name "SPAC11D3.01c"; gene_source "PomBase"; gene_biotype "protein_coding"; transcript_name "SPAC11D3.01c.1"; transcript_source "PomBase"; transcript_biotype "protein_coding";
I	PomBase	exon	108732	109195	.	-	.	gene_id "SPAC11D3.01c"; transcript_id "SPAC11D3.01c.1"; exon_number "1"; gene_name "SPAC11D3.01c"; gene_source "PomBase"; gene_biotype "protein_coding"; transcript_name "SPAC11D3.01c.1"; transcript_source "PomBase"; transcript_biotype "protein_coding"; exon_id "SPAC11D3.01c.1:exon:1";
I	PomBase	CDS	108908	109147	.	-	0	gene_id "SPAC11D3.01c"; transcript_id "SPAC11D3.01c.1"; exon_number "1"; gene_name "SPAC11D3.01c"; gene_source "PomBase"; gene_biotype "protein_coding"; transcript_name "SPAC11D3.01c.1"; transcript_source "PomBase"; transcript_biotype "protein_coding"; protein_id "SPAC11D3.01c.1:pep";
I	PomBase	start_codon	109145	109147	.	-	0	gene_id "SPAC11D3.01c"; transcript_id "SPAC11D3.01c.1"; exon_number "1"; gene_name "SPAC11D3.01c"; gene_source "PomBase"; gene_biotype "protein_coding"; transcript_name "SPAC11D3.01c.1"; transcript_source "PomBase"; transcript_biotype "protein_coding";
I	PomBase	five_prime_utr	109148	109195	.	-	.	gene_id "SPAC11D3.01c"; transcript_id "SPAC11D3.01c.1"; gene_name "SPAC11D3.01c"; gene_source "PomBase"; gene_biotype "protein_coding"; transcript_name "SPAC11D3.01c.1"; transcript_source "PomBase"; transcript_biotype "protein_coding";
I	PomBase	three_prime_utr	108732	108907	.	-	.	gene_id "SPAC11D3.01c"; transcript_id "SPAC11D3.01c.1"; gene_name "SPAC11D3.01c"; gene_source "PomBase"; gene_biotype "protein_coding"; transcript_name "SPAC11D3.01c.1"; transcript_source "PomBase"; transcript_biotype "protein_coding";
I	PomBase	gene	109628	112377	.	+	.	gene_id "SPNCRNA.608"; gene_name "SPNCRNA.608"; gene_source "PomBase"; gene_biotype "ncRNA";
I	PomBase	transcript	109628	112377	.	+	.	gene_id "SPNCRNA.608"; transcript_id "SPNCRNA.608.1"; gene_name "SPNCRNA.608"; gene_source "PomBase"; gene_biotype "ncRNA"; transcript_name "SPNCRNA.608.1"; transcript_source "PomBase"; transcript_biotype "ncRNA";
I	PomBase	exon	109628	112377	.	+	.	gene_id "SPNCRNA.608"; transcript_id "SPNCRNA.608.1"; exon_number "1"; gene_name "SPNCRNA.608"; gene_source "PomBase"; gene_biotype "ncRNA"; transcript_name "SPNCRNA.608.1"; transcript_source "PomBase"; transcript_biotype "ncRNA"; exon_id "SPNCRNA.608.1:exon:1";
I	PomBase	gene	109829	110455	.	-	.	gene_id "SPAC11D3.02c"; gene_name "SPAC11D3.02c"; gene_source "PomBase"; gene_biotype "protein_coding";
I	PomBase	transcript	109829	110455	.	-	.	gene_id "SPAC11D3.02c"; transcript_id "SPAC11D3.02c.1"; gene_name "SPAC11D3.02c"; gene_source "PomBase"; gene_biotype "protein_coding"; transcript_name "SPAC11D3.02c.1"; transcript_source "PomBase"; transcript_biotype "protein_coding";
I	PomBase	exon	109829	110455	.	-	.	gene_id "SPAC11D3.02c"; transcript_id "SPAC11D3.02c.1"; exon_number "1"; gene_name "SPAC11D3.02c"; gene_source "PomBase"; gene_biotype "protein_coding"; transcript_name "SPAC11D3.02c.1"; transcript_source "PomBase"; transcript_biotype "protein_coding"; exon_id "SPAC11D3.02c.1:exon:1";
I	PomBase	CDS	109832	110281	.	-	0	gene_id "SPAC11D3.02c"; transcript_id "SPAC11D3.02c.1"; exon_number "1"; gene_name "SPAC11D3.02c"; gene_source "PomBase"; gene_biotype "protein_coding"; transcript_name "SPAC11D3.02c.1"; transcript_source "PomBase"; transcript_biotype "protein_coding"; protein_id "SPAC11D3.02c.1:pep";
I	PomBase	start_codon	110279	110281	.	-	0	gene_id "SPAC11D3.02c"; transcript_id "SPAC11D3.02c.1"; exon_number "1"; gene_name "SPAC11D3.02c"; gene_source "PomBase"; gene_biotype "protein_coding"; transcript_name "SPAC11D3.02c.1"; transcript_source "PomBase"; transcript_biotype "protein_coding";
I	PomBase	stop_codon	109829	109831	.	-	0	gene_id "SPAC11D3.02c"; transcript_id "SPAC11D3.02c.1"; exon_number "1"; gene_name "SPAC11D3.02c"; gene_source "PomBase"; gene_biotype "protein_coding"; transcript_name "SPAC11D3.02c.1"; transcript_source "PomBase"; transcript_biotype "protein_coding";
I	PomBase	five_prime_utr	110282	110455	.	-	.	gene_id "SPAC11D3.02c"; transcript_id "SPAC11D3.02c.1"; gene_name "SPAC11D3.02c"; gene_source "PomBase"; gene_biotype "protein_coding"; transcript_name "SPAC11D3.02c.1"; transcript_source "PomBase"; transcript_biotype "protein_coding";
I	PomBase	gene	110904	112499	.	-	.	gene_id "SPAC11D3.03c"; gene_name "SPAC11D3.03c"; gene_source "PomBase"; gene_biotype "protein_coding";
I	PomBase	transcript	110904	112499	.	-	.	gene_id "SPAC11D3.03c"; transcript_id "SPAC11D3.03c.1"; gene_name "SPAC11D3.03c"; gene_source "PomBase"; gene_biotype "protein_coding"; transcript_name "SPAC11D3.03c.1"; transcript_source "PomBase"; transcript_biotype "protein_coding";
I	PomBase	exon	112378	112499	.	-	.	gene_id "SPAC11D3.03c"; transcript_id "SPAC11D3.03c.1"; exon_number "1"; gene_name "SPAC11D3.03c"; gene_source "PomBase"; gene_biotype "protein_coding"; transcript_name "SPAC11D3.03c.1"; transcript_source "PomBase"; transcript_biotype "protein_coding"; exon_id "SPAC11D3.03c.1:five_prime_UTR:1";
I	PomBase	exon	112098	112333	.	-	.	gene_id "SPAC11D3.03c"; transcript_id "SPAC11D3.03c.1"; exon_number "2"; gene_name "SPAC11D3.03c"; gene_source "PomBase"; gene_biotype "protein_coding"; transcript_name "SPAC11D3.03c.1"; transcript_source "PomBase"; transcript_biotype "protein_coding"; exon_id "SPAC11D3.03c.1:five_prime_UTR:2";
I	PomBase	exon	110904	112046	.	-	.	gene_id "SPAC11D3.03c"; transcript_id "SPAC11D3.03c.1"; exon_number "3"; gene_name "SPAC11D3.03c"; gene_source "PomBase"; gene_biotype "protein_coding"; transcript_name "SPAC11D3.03c.1"; transcript_source "PomBase"; transcript_biotype "protein_coding"; exon_id "SPAC11D3.03c.1:exon:1";
I	PomBase	CDS	111005	111913	.	-	0	gene_id "SPAC11D3.03c"; transcript_id "SPAC11D3.03c.1"; exon_number "3"; gene_name "SPAC11D3.03c"; gene_source "PomBase"; gene_biotype "protein_coding"; transcript_name "SPAC11D3.03c.1"; transcript_source "PomBase"; transcript_biotype "protein_coding"; protein_id "SPAC11D3.03c.1:pep";
I	PomBase	start_codon	111911	111913	.	-	0	gene_id "SPAC11D3.03c"; transcript_id "SPAC11D3.03c.1"; exon_number "3"; gene_name "SPAC11D3.03c"; gene_source "PomBase"; gene_biotype "protein_coding"; transcript_name "SPAC11D3.03c.1"; transcript_source "PomBase"; transcript_biotype "protein_coding";
I	PomBase	five_prime_utr	112378	112499	.	-	.	gene_id "SPAC11D3.03c"; transcript_id "SPAC11D3.03c.1"; gene_name "SPAC11D3.03c"; gene_source "PomBase"; gene_biotype "protein_coding"; transcript_name "SPAC11D3.03c.1"; transcript_source "PomBase"; transcript_biotype "protein_coding";
I	PomBase	five_prime_utr	112098	112333	.	-	.	gene_id "SPAC11D3.03c"; transcript_id "SPAC11D3.03c.1"; gene_name "SPAC11D3.03c"; gene_source "PomBase"; gene_biotype "protein_coding"; transcript_name "SPAC11D3.03c.1"; transcript_source "PomBase"; transcript_biotype "protein_coding";
I	PomBase	five_prime_utr	111914	112046	.	-	.	gene_id "SPAC11D3.03c"; transcript_id "SPAC11D3.03c.1"; gene_name "SPAC11D3.03c"; gene_source "PomBase"; gene_biotype "protein_coding"; transcript_name "SPAC11D3.03c.1"; transcript_source "PomBase"; transcript_biotype "protein_coding";
I	PomBase	three_prime_utr	110904	111004	.	-	.	gene_id "SPAC11D3.03c"; transcript_id "SPAC11D3.03c.1"; gene_name "SPAC11D3.03c"; gene_source "PomBase"; gene_biotype "protein_coding"; transcript_name "SPAC11D3.03c.1"; transcript_source "PomBase"; transcript_biotype "protein_coding";
I	PomBase	gene	112514	114445	.	-	.	gene_id "SPAC11D3.04c"; gene_name "SPAC11D3.04c"; gene_source "PomBase"; gene_biotype "protein_coding";
I	PomBase	transcript	112514	114445	.	-	.	gene_id "SPAC11D3.04c"; transcript_id "SPAC11D3.04c.1"; gene_name "SPAC11D3.04c"; gene_source "PomBase"; gene_biotype "protein_coding"; transcript_name "SPAC11D3.04c.1"; transcript_source "PomBase"; transcript_biotype "protein_coding";
I	PomBase	exon	113435	114445	.	-	.	gene_id "SPAC11D3.04c"; transcript_id "SPAC11D3.04c.1"; exon_number "1"; gene_name "SPAC11D3.04c"; gene_source "PomBase"; gene_biotype "protein_coding"; transcript_name "SPAC11D3.04c.1"; transcript_source "PomBase"; transcript_biotype "protein_coding"; exon_id "SPAC11D3.04c.1:five_prime_UTR:1";
I	PomBase	exon	112514	113367	.	-	.	gene_id "SPAC11D3.04c"; transcript_id "SPAC11D3.04c.1"; exon_number "2"; gene_name "SPAC11D3.04c"; gene_source "PomBase"; gene_biotype "protein_coding"; transcript_name "SPAC11D3.04c.1"; transcript_source "PomBase"; transcript_biotype "protein_coding"; exon_id "SPAC11D3.04c.1:exon:1";
I	PomBase	CDS	112917	113309	.	-	0	gene_id "SPAC11D3.04c"; transcript_id "SPAC11D3.04c.1"; exon_number "2"; gene_name "SPAC11D3.04c"; gene_source "PomBase"; gene_biotype "protein_coding"; transcript_name "SPAC11D3.04c.1"; transcript_source "PomBase"; transcript_biotype "protein_coding"; protein_id "SPAC11D3.04c.1:pep";
I	PomBase	start_codon	113307	113309	.	-	0	gene_id "SPAC11D3.04c"; transcript_id "SPAC11D3.04c.1"; exon_number "2"; gene_name "SPAC11D3.04c"; gene_source "PomBase"; gene_biotype "protein_coding"; transcript_name "SPAC11D3.04c.1"; transcript_source "PomBase"; transcript_biotype "protein_coding";
I	PomBase	five_prime_utr	113435	114445	.	-	.	gene_id "SPAC11D3.04c"; transcript_id "SPAC11D3.04c.1"; gene_name "SPAC11D3.04c"; gene_source "PomBase"; gene_biotype "protein_coding"; transcript_name "SPAC11D3.04c.1"; transcript_source "PomBase"; transcript_biotype "protein_coding";
I	PomBase	five_prime_utr	113310	113367	.	-	.	gene_id "SPAC11D3.04c"; transcript_id "SPAC11D3.04c.1"; gene_name "SPAC11D3.04c"; gene_source "PomBase"; gene_biotype "protein_coding"; transcript_name "SPAC11D3.04c.1"; transcript_source "PomBase"; transcript_biotype "protein_coding";
I	PomBase	three_prime_utr	112514	112916	.	-	.	gene_id "SPAC11D3.04c"; transcript_id "SPAC11D3.04c.1"; gene_name "SPAC11D3.04c"; gene_source "PomBase"; gene_biotype "protein_coding"; transcript_name "SPAC11D3.04c.1"; transcript_source "PomBase"; transcript_biotype "protein_coding";
I	PomBase	gene	113950	115962	.	+	.	gene_id "SPAC11D3.05"; gene_name "mfs2"; gene_source "PomBase"; gene_biotype "protein_coding";
I	PomBase	transcript	113950	115962	.	+	.	gene_id "SPAC11D3.05"; transcript_id "SPAC11D3.05.1"; gene_name "mfs2"; gene_source "PomBase"; gene_biotype "protein_coding"; transcript_name "mfs2"; transcript_source "PomBase"; transcript_biotype "protein_coding";
I	PomBase	exon	113950	115962	.	+	.	gene_id "SPAC11D3.05"; transcript_id "SPAC11D3.05.1"; exon_number "1"; gene_name "mfs2"; gene_source "PomBase"; gene_biotype "protein_coding"; transcript_name "mfs2"; transcript_source "PomBase"; transcript_biotype "protein_coding"; exon_id "SPAC11D3.05.1:exon:1";
I	PomBase	CDS	114080	115720	.	+	0	gene_id "SPAC11D3.05"; transcript_id "SPAC11D3.05.1"; exon_number "1"; gene_name "mfs2"; gene_source "PomBase"; gene_biotype "protein_coding"; transcript_name "mfs2"; transcript_source "PomBase"; transcript_biotype "protein_coding"; protein_id "SPAC11D3.05.1:pep";
I	PomBase	start_codon	114080	114082	.	+	0	gene_id "SPAC11D3.05"; transcript_id "SPAC11D3.05.1"; exon_number "1"; gene_name "mfs2"; gene_source "PomBase"; gene_biotype "protein_coding"; transcript_name "mfs2"; transcript_source "PomBase"; transcript_biotype "protein_coding";
I	PomBase	five_prime_utr	113950	114079	.	+	.	gene_id "SPAC11D3.05"; transcript_id "SPAC11D3.05.1"; gene_name "mfs2"; gene_source "PomBase"; gene_biotype "protein_coding"; transcript_name "mfs2"; transcript_source "PomBase"; transcript_biotype "protein_coding";
I	PomBase	three_prime_utr	115721	115962	.	+	.	gene_id "SPAC11D3.05"; transcript_id "SPAC11D3.05.1"; gene_name "mfs2"; gene_source "PomBase"; gene_biotype "protein_coding"; transcript_name "mfs2"; transcript_source "PomBase"; transcript_biotype "protein_coding";
I	PomBase	gene	116054	120309	.	-	.	gene_id "SPAC11D3.07c"; gene_name "toe4"; gene_source "PomBase"; gene_biotype "protein_coding";
I	PomBase	transcript	116054	120309	.	-	.	gene_id "SPAC11D3.07c"; transcript_id "SPAC11D3.07c.1"; gene_name "toe4"; gene_source "PomBase"; gene_biotype "protein_coding"; transcript_name "toe4"; transcript_source "PomBase"; transcript_biotype "protein_coding";
I	PomBase	exon	116054	120309	.	-	.	gene_id "SPAC11D3.07c"; transcript_id "SPAC11D3.07c.1"; exon_number "1"; gene_name "toe4"; gene_source "PomBase"; gene_biotype "protein_coding"; transcript_name "toe4"; transcript_source "PomBase"; transcript_biotype "protein_coding"; exon_id "SPAC11D3.07c.1:exon:1";
I	PomBase	CDS	118195	120108	.	-	0	gene_id "SPAC11D3.07c"; transcript_id "SPAC11D3.07c.1"; exon_number "1"; gene_name "toe4"; gene_source "PomBase"; gene_biotype "protein_coding"; transcript_name "toe4"; transcript_source "PomBase"; transcript_biotype "protein_coding"; protein_id "SPAC11D3.07c.1:pep";
I	PomBase	start_codon	120106	120108	.	-	0	gene_id "SPAC11D3.07c"; transcript_id "SPAC11D3.07c.1"; exon_number "1"; gene_name "toe4"; gene_source "PomBase"; gene_biotype "protein_coding"; transcript_name "toe4"; transcript_source "PomBase"; transcript_biotype "protein_coding";
I	PomBase	five_prime_utr	120109	120309	.	-	.	gene_id "SPAC11D3.07c"; transcript_id "SPAC11D3.07c.1"; gene_name "toe4"; gene_source "PomBase"; gene_biotype "protein_coding"; transcript_name "toe4"; transcript_source "PomBase"; transcript_biotype "protein_coding";
I	PomBase	three_prime_utr	116054	118194	.	-	.	gene_id "SPAC11D3.07c"; transcript_id "SPAC11D3.07c.1"; gene_name "toe4"; gene_source "PomBase"; gene_biotype "protein_coding"; transcript_name "toe4"; transcript_source "PomBase"; transcript_biotype "protein_coding";
I	PomBase	gene	116331	118189	.	+	.	gene_id "SPAC11D3.06"; gene_name "SPAC11D3.06"; gene_source "PomBase"; gene_biotype "protein_coding";
I	PomBase	transcript	116331	118189	.	+	.	gene_id "SPAC11D3.06"; transcript_id "SPAC11D3.06.1"; gene_name "SPAC11D3.06"; gene_source "PomBase"; gene_biotype "protein_coding"; transcript_name "SPAC11D3.06.1"; transcript_source "PomBase"; transcript_biotype "protein_coding";
I	PomBase	exon	116331	118189	.	+	.	gene_id "SPAC11D3.06"; transcript_id "SPAC11D3.06.1"; exon_number "1"; gene_name "SPAC11D3.06"; gene_source "PomBase"; gene_biotype "protein_coding"; transcript_name "SPAC11D3.06.1"; transcript_source "PomBase"; transcript_biotype "protein_coding"; exon_id "SPAC11D3.06.1:exon:1";
I	PomBase	CDS	116693	118057	.	+	0	gene_id "SPAC11D3.06"; transcript_id "SPAC11D3.06.1"; exon_number "1"; gene_name "SPAC11D3.06"; gene_source "PomBase"; gene_biotype "protein_coding"; transcript_name "SPAC11D3.06.1"; transcript_source "PomBase"; transcript_biotype "protein_coding"; protein_id "SPAC11D3.06.1:pep";
I	PomBase	start_codon	116693	116695	.	+	0	gene_id "SPAC11D3.06"; transcript_id "SPAC11D3.06.1"; exon_number "1"; gene_name "SPAC11D3.06"; gene_source "PomBase"; gene_biotype "protein_coding"; transcript_name "SPAC11D3.06.1"; transcript_source "PomBase"; transcript_biotype "protein_coding";
I	PomBase	stop_codon	118058	118060	.	+	0	gene_id "SPAC11D3.06"; transcript_id "SPAC11D3.06.1"; exon_number "1"; gene_name "SPAC11D3.06"; gene_source "PomBase"; gene_biotype "protein_coding"; transcript_name "SPAC11D3.06.1"; transcript_source "PomBase"; transcript_biotype "protein_coding";
I	PomBase	five_prime_utr	116331	116692	.	+	.	gene_id "SPAC11D3.06"; transcript_id "SPAC11D3.06.1"; gene_name "SPAC11D3.06"; gene_source "PomBase"; gene_biotype "protein_coding"; transcript_name "SPAC11D3.06.1"; transcript_source "PomBase"; transcript_biotype "protein_coding";
I	PomBase	three_prime_utr	118061	118189	.	+	.	gene_id "SPAC11D3.06"; transcript_id "SPAC11D3.06.1"; gene_name "SPAC11D3.06"; gene_source "PomBase"; gene_biotype "protein_coding"; transcript_name "SPAC11D3.06.1"; transcript_source "PomBase"; transcript_biotype "protein_coding";
I	PomBase	gene	120321	123785	.	-	.	gene_id "SPAC11D3.08c"; gene_name "SPAC11D3.08c"; gene_source "PomBase"; gene_biotype "protein_coding";
I	PomBase	transcript	120321	123785	.	-	.	gene_id "SPAC11D3.08c"; transcript_id "SPAC11D3.08c.1"; gene_name "SPAC11D3.08c"; gene_source "PomBase"; gene_biotype "protein_coding"; transcript_name "SPAC11D3.08c.1"; transcript_source "PomBase"; transcript_biotype "protein_coding";
I	PomBase	exon	120321	123785	.	-	.	gene_id "SPAC11D3.08c"; transcript_id "SPAC11D3.08c.1"; exon_number "1"; gene_name "SPAC11D3.08c"; gene_source "PomBase"; gene_biotype "protein_coding"; transcript_name "SPAC11D3.08c.1"; transcript_source "PomBase"; transcript_biotype "protein_coding"; exon_id "SPAC11D3.08c.1:exon:1";
I	PomBase	CDS	120556	122208	.	-	0	gene_id "SPAC11D3.08c"; transcript_id "SPAC11D3.08c.1"; exon_number "1"; gene_name "SPAC11D3.08c"; gene_source "PomBase"; gene_biotype "protein_coding"; transcript_name "SPAC11D3.08c.1"; transcript_source "PomBase"; transcript_biotype "protein_coding"; protein_id "SPAC11D3.08c.1:pep";
I	PomBase	start_codon	122206	122208	.	-	0	gene_id "SPAC11D3.08c"; transcript_id "SPAC11D3.08c.1"; exon_number "1"; gene_name "SPAC11D3.08c"; gene_source "PomBase"; gene_biotype "protein_coding"; transcript_name "SPAC11D3.08c.1"; transcript_source "PomBase"; transcript_biotype "protein_coding";
I	PomBase	five_prime_utr	122209	123785	.	-	.	gene_id "SPAC11D3.08c"; transcript_id "SPAC11D3.08c.1"; gene_name "SPAC11D3.08c"; gene_source "PomBase"; gene_biotype "protein_coding"; transcript_name "SPAC11D3.08c.1"; transcript_source "PomBase"; transcript_biotype "protein_coding";
I	PomBase	three_prime_utr	120321	120555	.	-	.	gene_id "SPAC11D3.08c"; transcript_id "SPAC11D3.08c.1"; gene_name "SPAC11D3.08c"; gene_source "PomBase"; gene_biotype "protein_coding"; transcript_name "SPAC11D3.08c.1"; transcript_source "PomBase"; transcript_biotype "protein_coding";
I	PomBase	gene	122187	124116	.	+	.	gene_id "SPAC11D3.09"; gene_name "SPAC11D3.09"; gene_source "PomBase"; gene_biotype "protein_coding";
I	PomBase	transcript	122187	124116	.	+	.	gene_id "SPAC11D3.09"; transcript_id "SPAC11D3.09.1"; gene_name "SPAC11D3.09"; gene_source "PomBase"; gene_biotype "protein_coding"; transcript_name "SPAC11D3.09.1"; transcript_source "PomBase"; transcript_biotype "protein_coding";
I	PomBase	exon	122187	124116	.	+	.	gene_id "SPAC11D3.09"; transcript_id "SPAC11D3.09.1"; exon_number "1"; gene_name "SPAC11D3.09"; gene_source "PomBase"; gene_biotype "protein_coding"; transcript_name "SPAC11D3.09.1"; transcript_source "PomBase"; transcript_biotype "protein_coding"; exon_id "SPAC11D3.09.1:exon:1";
I	PomBase	CDS	122845	124026	.	+	0	gene_id "SPAC11D3.09"; transcript_id "SPAC11D3.09.1"; exon_number "1"; gene_name "SPAC11D3.09"; gene_source "PomBase"; gene_biotype "protein_coding"; transcript_name "SPAC11D3.09.1"; transcript_source "PomBase"; transcript_biotype "protein_coding"; protein_id "SPAC11D3.09.1:pep";
I	PomBase	start_codon	122845	122847	.	+	0	gene_id "SPAC11D3.09"; transcript_id "SPAC11D3.09.1"; exon_number "1"; gene_name "SPAC11D3.09"; gene_source "PomBase"; gene_biotype "protein_coding"; transcript_name "SPAC11D3.09.1"; transcript_source "PomBase"; transcript_biotype "protein_coding";
I	PomBase	stop_codon	124027	124029	.	+	0	gene_id "SPAC11D3.09"; transcript_id "SPAC11D3.09.1"; exon_number "1"; gene_name "SPAC11D3.09"; gene_source "PomBase"; gene_biotype "protein_coding"; transcript_name "SPAC11D3.09.1"; transcript_source "PomBase"; transcript_biotype "protein_coding";
I	PomBase	five_prime_utr	122187	122844	.	+	.	gene_id "SPAC11D3.09"; transcript_id "SPAC11D3.09.1"; gene_name "SPAC11D3.09"; gene_source "PomBase"; gene_biotype "protein_coding"; transcript_name "SPAC11D3.09.1"; transcript_source "PomBase"; transcript_biotype "protein_coding";
I	PomBase	three_prime_utr	124030	124116	.	+	.	gene_id "SPAC11D3.09"; transcript_id "SPAC11D3.09.1"; gene_name "SPAC11D3.09"; gene_source "PomBase"; gene_biotype "protein_coding"; transcript_name "SPAC11D3.09.1"; transcript_source "PomBase"; transcript_biotype "protein_coding";
I	PomBase	gene	124907	129053	.	+	.	gene_id "SPAC11D3.10"; gene_name "SPAC11D3.10"; gene_source "PomBase"; gene_biotype "protein_coding";
I	PomBase	transcript	124907	129053	.	+	.	gene_id "SPAC11D3.10"; transcript_id "SPAC11D3.10.1"; gene_name "SPAC11D3.10"; gene_source "PomBase"; gene_biotype "protein_coding"; transcript_name "SPAC11D3.10.1"; transcript_source "PomBase"; transcript_biotype "protein_coding";
I	PomBase	exon	124907	129053	.	+	.	gene_id "SPAC11D3.10"; transcript_id "SPAC11D3.10.1"; exon_number "1"; gene_name "SPAC11D3.10"; gene_source "PomBase"; gene_biotype "protein_coding"; transcript_name "SPAC11D3.10.1"; transcript_source "PomBase"; transcript_biotype "protein_coding"; exon_id "SPAC11D3.10.1:exon:1";
I	PomBase	CDS	125582	126886	.	+	0	gene_id "SPAC11D3.10"; transcript_id "SPAC11D3.10.1"; exon_number "1"; gene_name "SPAC11D3.10"; gene_source "PomBase"; gene_biotype "protein_coding"; transcript_name "SPAC11D3.10.1"; transcript_source "PomBase"; transcript_biotype "protein_coding"; protein_id "SPAC11D3.10.1:pep";
I	PomBase	start_codon	125582	125584	.	+	0	gene_id "SPAC11D3.10"; transcript_id "SPAC11D3.10.1"; exon_number "1"; gene_name "SPAC11D3.10"; gene_source "PomBase"; gene_biotype "protein_coding"; transcript_name "SPAC11D3.10.1"; transcript_source "PomBase"; transcript_biotype "protein_coding";
I	PomBase	five_prime_utr	124907	125581	.	+	.	gene_id "SPAC11D3.10"; transcript_id "SPAC11D3.10.1"; gene_name "SPAC11D3.10"; gene_source "PomBase"; gene_biotype "protein_coding"; transcript_name "SPAC11D3.10.1"; transcript_source "PomBase"; transcript_biotype "protein_coding";
I	PomBase	three_prime_utr	126887	129053	.	+	.	gene_id "SPAC11D3.10"; transcript_id "SPAC11D3.10.1"; gene_name "SPAC11D3.10"; gene_source "PomBase"; gene_biotype "protein_coding"; transcript_name "SPAC11D3.10.1"; transcript_source "PomBase"; transcript_biotype "protein_coding";
I	PomBase	gene	126951	129316	.	-	.	gene_id "SPAC11D3.11c"; gene_name "SPAC11D3.11c"; gene_source "PomBase"; gene_biotype "protein_coding";
I	PomBase	transcript	126951	129316	.	-	.	gene_id "SPAC11D3.11c"; transcript_id "SPAC11D3.11c.1"; gene_name "SPAC11D3.11c"; gene_source "PomBase"; gene_biotype "protein_coding"; transcript_name "SPAC11D3.11c.1"; transcript_source "PomBase"; transcript_biotype "protein_coding";
I	PomBase	exon	129172	129316	.	-	.	gene_id "SPAC11D3.11c"; transcript_id "SPAC11D3.11c.1"; exon_number "1"; gene_name "SPAC11D3.11c"; gene_source "PomBase"; gene_biotype "protein_coding"; transcript_name "SPAC11D3.11c.1"; transcript_source "PomBase"; transcript_biotype "protein_coding"; exon_id "SPAC11D3.11c.1:exon:1";
I	PomBase	CDS	129172	129185	.	-	0	gene_id "SPAC11D3.11c"; transcript_id "SPAC11D3.11c.1"; exon_number "1"; gene_name "SPAC11D3.11c"; gene_source "PomBase"; gene_biotype "protein_coding"; transcript_name "SPAC11D3.11c.1"; transcript_source "PomBase"; transcript_biotype "protein_coding"; protein_id "SPAC11D3.11c.1:pep";
I	PomBase	start_codon	129183	129185	.	-	0	gene_id "SPAC11D3.11c"; transcript_id "SPAC11D3.11c.1"; exon_number "1"; gene_name "SPAC11D3.11c"; gene_source "PomBase"; gene_biotype "protein_coding"; transcript_name "SPAC11D3.11c.1"; transcript_source "PomBase"; transcript_biotype "protein_coding";
I	PomBase	exon	129103	129127	.	-	.	gene_id "SPAC11D3.11c"; transcript_id "SPAC11D3.11c.1"; exon_number "2"; gene_name "SPAC11D3.11c"; gene_source "PomBase"; gene_biotype "protein_coding"; transcript_name "SPAC11D3.11c.1"; transcript_source "PomBase"; transcript_biotype "protein_coding"; exon_id "SPAC11D3.11c.1:exon:2";
I	PomBase	CDS	129103	129127	.	-	1	gene_id "SPAC11D3.11c"; transcript_id "SPAC11D3.11c.1"; exon_number "2"; gene_name "SPAC11D3.11c"; gene_source "PomBase"; gene_biotype "protein_coding"; transcript_name "SPAC11D3.11c.1"; transcript_source "PomBase"; transcript_biotype "protein_coding"; protein_id "SPAC11D3.11c.1:pep";
I	PomBase	exon	126951	129059	.	-	.	gene_id "SPAC11D3.11c"; transcript_id "SPAC11D3.11c.1"; exon_number "3"; gene_name "SPAC11D3.11c"; gene_source "PomBase"; gene_biotype "protein_coding"; transcript_name "SPAC11D3.11c.1"; transcript_source "PomBase"; transcript_biotype "protein_coding"; exon_id "SPAC11D3.11c.1:exon:3";
I	PomBase	CDS	128028	129059	.	-	0	gene_id "SPAC11D3.11c"; transcript_id "SPAC11D3.11c.1"; exon_number "3"; gene_name "SPAC11D3.11c"; gene_source "PomBase"; gene_biotype "protein_coding"; transcript_name "SPAC11D3.11c.1"; transcript_source "PomBase"; transcript_biotype "protein_coding"; protein_id "SPAC11D3.11c.1:pep";
I	PomBase	stop_codon	128025	128027	.	-	0	gene_id "SPAC11D3.11c"; transcript_id "SPAC11D3.11c.1"; exon_number "3"; gene_name "SPAC11D3.11c"; gene_source "PomBase"; gene_biotype "protein_coding"; transcript_name "SPAC11D3.11c.1"; transcript_source "PomBase"; transcript_biotype "protein_coding";
I	PomBase	five_prime_utr	129186	129316	.	-	.	gene_id "SPAC11D3.11c"; transcript_id "SPAC11D3.11c.1"; gene_name "SPAC11D3.11c"; gene_source "PomBase"; gene_biotype "protein_coding"; transcript_name "SPAC11D3.11c.1"; transcript_source "PomBase"; transcript_biotype "protein_coding";
I	PomBase	three_prime_utr	126951	128024	.	-	.	gene_id "SPAC11D3.11c"; transcript_id "SPAC11D3.11c.1"; gene_name "SPAC11D3.11c"; gene_source "PomBase"; gene_biotype "protein_coding"; transcript_name "SPAC11D3.11c.1"; transcript_source "PomBase"; transcript_biotype "protein_coding";
I	PomBase	gene	130148	131268	.	+	.	gene_id "SPAC11D3.13"; gene_name "hsp3104"; gene_source "PomBase"; gene_biotype "protein_coding";
I	PomBase	transcript	130148	131268	.	+	.	gene_id "SPAC11D3.13"; transcript_id "SPAC11D3.13.1"; gene_name "hsp3104"; gene_source "PomBase"; gene_biotype "protein_coding"; transcript_name "hsp3104"; transcript_source "PomBase"; transcript_biotype "protein_coding";
I	PomBase	exon	130148	131268	.	+	.	gene_id "SPAC11D3.13"; transcript_id "SPAC11D3.13.1"; exon_number "1"; gene_name "hsp3104"; gene_source "PomBase"; gene_biotype "protein_coding"; transcript_name "hsp3104"; transcript_source "PomBase"; transcript_biotype "protein_coding"; exon_id "SPAC11D3.13.1:exon:1";
I	PomBase	CDS	130329	130997	.	+	0	gene_id "SPAC11D3.13"; transcript_id "SPAC11D3.13.1"; exon_number "1"; gene_name "hsp3104"; gene_source "PomBase"; gene_biotype "protein_coding"; transcript_name "hsp3104"; transcript_source "PomBase"; transcript_biotype "protein_coding"; protein_id "SPAC11D3.13.1:pep";
I	PomBase	start_codon	130329	130331	.	+	0	gene_id "SPAC11D3.13"; transcript_id "SPAC11D3.13.1"; exon_number "1"; gene_name "hsp3104"; gene_source "PomBase"; gene_biotype "protein_coding"; transcript_name "hsp3104"; transcript_source "PomBase"; transcript_biotype "protein_coding";
I	PomBase	five_prime_utr	130148	130328	.	+	.	gene_id "SPAC11D3.13"; transcript_id "SPAC11D3.13.1"; gene_name "hsp3104"; gene_source "PomBase"; gene_biotype "protein_coding"; transcript_name "hsp3104"; transcript_source "PomBase"; transcript_biotype "protein_coding";
I	PomBase	three_prime_utr	130998	131268	.	+	.	gene_id "SPAC11D3.13"; transcript_id "SPAC11D3.13.1"; gene_name "hsp3104"; gene_source "PomBase"; gene_biotype "protein_coding"; transcript_name "hsp3104"; transcript_source "PomBase"; transcript_biotype "protein_coding";
I	PomBase	gene	131190	135736	.	-	.	gene_id "SPAC11D3.14c"; gene_name "SPAC11D3.14c"; gene_source "PomBase"; gene_biotype "protein_coding";
I	PomBase	transcript	131190	135736	.	-	.	gene_id "SPAC11D3.14c"; transcript_id "SPAC11D3.14c.1"; gene_name "SPAC11D3.14c"; gene_source "PomBase"; gene_biotype "protein_coding"; transcript_name "SPAC11D3.14c.1"; transcript_source "PomBase"; transcript_biotype "protein_coding";
I	PomBase	exon	131190	135736	.	-	.	gene_id "SPAC11D3.14c"; transcript_id "SPAC11D3.14c.1"; exon_number "1"; gene_name "SPAC11D3.14c"; gene_source "PomBase"; gene_biotype "protein_coding"; transcript_name "SPAC11D3.14c.1"; transcript_source "PomBase"; transcript_biotype "protein_coding"; exon_id "SPAC11D3.14c.1:exon:1";
I	PomBase	CDS	131322	135101	.	-	0	gene_id "SPAC11D3.14c"; transcript_id "SPAC11D3.14c.1"; exon_number "1"; gene_name "SPAC11D3.14c"; gene_source "PomBase"; gene_biotype "protein_coding"; transcript_name "SPAC11D3.14c.1"; transcript_source "PomBase"; transcript_biotype "protein_coding"; protein_id "SPAC11D3.14c.1:pep";
I	PomBase	start_codon	135099	135101	.	-	0	gene_id "SPAC11D3.14c"; transcript_id "SPAC11D3.14c.1"; exon_number "1"; gene_name "SPAC11D3.14c"; gene_source "PomBase"; gene_biotype "protein_coding"; transcript_name "SPAC11D3.14c.1"; transcript_source "PomBase"; transcript_biotype "protein_coding";
I	PomBase	stop_codon	131319	131321	.	-	0	gene_id "SPAC11D3.14c"; transcript_id "SPAC11D3.14c.1"; exon_number "1"; gene_name "SPAC11D3.14c"; gene_source "PomBase"; gene_biotype "protein_coding"; transcript_name "SPAC11D3.14c.1"; transcript_source "PomBase"; transcript_biotype "protein_coding";
I	PomBase	five_prime_utr	135102	135736	.	-	.	gene_id "SPAC11D3.14c"; transcript_id "SPAC11D3.14c.1"; gene_name "SPAC11D3.14c"; gene_source "PomBase"; gene_biotype "protein_coding"; transcript_name "SPAC11D3.14c.1"; transcript_source "PomBase"; transcript_biotype "protein_coding";
I	PomBase	three_prime_utr	131190	131318	.	-	.	gene_id "SPAC11D3.14c"; transcript_id "SPAC11D3.14c.1"; gene_name "SPAC11D3.14c"; gene_source "PomBase"; gene_biotype "protein_coding"; transcript_name "SPAC11D3.14c.1"; transcript_source "PomBase"; transcript_biotype "protein_coding";
I	PomBase	gene	131203	135541	.	+	.	gene_id "SPNCRNA.609"; gene_name "SPAC11D3.14c-antisense-1"; gene_source "PomBase"; gene_biotype "ncRNA";
I	PomBase	transcript	131203	135541	.	+	.	gene_id "SPNCRNA.609"; transcript_id "SPNCRNA.609.1"; gene_name "SPAC11D3.14c-antisense-1"; gene_source "PomBase"; gene_biotype "ncRNA"; transcript_name "SPAC11D3.14c-antisense-1"; transcript_source "PomBase"; transcript_biotype "ncRNA";
I	PomBase	exon	131203	135541	.	+	.	gene_id "SPNCRNA.609"; transcript_id "SPNCRNA.609.1"; exon_number "1"; gene_name "SPAC11D3.14c-antisense-1"; gene_source "PomBase"; gene_biotype "ncRNA"; transcript_name "SPAC11D3.14c-antisense-1"; transcript_source "PomBase"; transcript_biotype "ncRNA"; exon_id "SPNCRNA.609.1:exon:1";
I	PomBase	gene	135569	135926	.	+	.	gene_id "SPNCRNA.147"; gene_name "SPNCRNA.147"; gene_source "PomBase"; gene_biotype "ncRNA";
I	PomBase	transcript	135569	135926	.	+	.	gene_id "SPNCRNA.147"; transcript_id "SPNCRNA.147.1"; gene_name "SPNCRNA.147"; gene_source "PomBase"; gene_biotype "ncRNA"; transcript_name "SPNCRNA.147.1"; transcript_source "PomBase"; transcript_biotype "ncRNA";
I	PomBase	exon	135569	135926	.	+	.	gene_id "SPNCRNA.147"; transcript_id "SPNCRNA.147.1"; exon_number "1"; gene_name "SPNCRNA.147"; gene_source "PomBase"; gene_biotype "ncRNA"; transcript_name "SPNCRNA.147.1"; transcript_source "PomBase"; transcript_biotype "ncRNA"; exon_id "SPNCRNA.147.1:exon:1";
I	PomBase	gene	136139	140365	.	+	.	gene_id "SPAC11D3.15"; gene_name "SPAC11D3.15"; gene_source "PomBase"; gene_biotype "protein_coding";
I	PomBase	transcript	136139	140365	.	+	.	gene_id "SPAC11D3.15"; transcript_id "SPAC11D3.15.1"; gene_name "SPAC11D3.15"; gene_source "PomBase"; gene_biotype "protein_coding"; transcript_name "SPAC11D3.15.1"; transcript_source "PomBase"; transcript_biotype "protein_coding";
I	PomBase	exon	136139	140365	.	+	.	gene_id "SPAC11D3.15"; transcript_id "SPAC11D3.15.1"; exon_number "1"; gene_name "SPAC11D3.15"; gene_source "PomBase"; gene_biotype "protein_coding"; transcript_name "SPAC11D3.15.1"; transcript_source "PomBase"; transcript_biotype "protein_coding"; exon_id "SPAC11D3.15.1:exon:1";
I	PomBase	CDS	136331	140281	.	+	0	gene_id "SPAC11D3.15"; transcript_id "SPAC11D3.15.1"; exon_number "1"; gene_name "SPAC11D3.15"; gene_source "PomBase"; gene_biotype "protein_coding"; transcript_name "SPAC11D3.15.1"; transcript_source "PomBase"; transcript_biotype "protein_coding"; protein_id "SPAC11D3.15.1:pep";
I	PomBase	start_codon	136331	136333	.	+	0	gene_id "SPAC11D3.15"; transcript_id "SPAC11D3.15.1"; exon_number "1"; gene_name "SPAC11D3.15"; gene_source "PomBase"; gene_biotype "protein_coding"; transcript_name "SPAC11D3.15.1"; transcript_source "PomBase"; transcript_biotype "protein_coding";
I	PomBase	stop_codon	140282	140284	.	+	0	gene_id "SPAC11D3.15"; transcript_id "SPAC11D3.15.1"; exon_number "1"; gene_name "SPAC11D3.15"; gene_source "PomBase"; gene_biotype "protein_coding"; transcript_name "SPAC11D3.15.1"; transcript_source "PomBase"; transcript_biotype "protein_coding";
I	PomBase	five_prime_utr	136139	136330	.	+	.	gene_id "SPAC11D3.15"; transcript_id "SPAC11D3.15.1"; gene_name "SPAC11D3.15"; gene_source "PomBase"; gene_biotype "protein_coding"; transcript_name "SPAC11D3.15.1"; transcript_source "PomBase"; transcript_biotype "protein_coding";
I	PomBase	three_prime_utr	140285	140365	.	+	.	gene_id "SPAC11D3.15"; transcript_id "SPAC11D3.15.1"; gene_name "SPAC11D3.15"; gene_source "PomBase"; gene_biotype "protein_coding"; transcript_name "SPAC11D3.15.1"; transcript_source "PomBase"; transcript_biotype "protein_coding";
I	PomBase	gene	136274	137355	.	-	.	gene_id "SPNCRNA.610"; gene_name "SPAC11D3.15-antisense-1"; gene_source "PomBase"; gene_biotype "ncRNA";
I	PomBase	transcript	136274	137355	.	-	.	gene_id "SPNCRNA.610"; transcript_id "SPNCRNA.610.1"; gene_name "SPAC11D3.15-antisense-1"; gene_source "PomBase"; gene_biotype "ncRNA"; transcript_name "SPAC11D3.15-antisense-1"; transcript_source "PomBase"; transcript_biotype "ncRNA";
I	PomBase	exon	136274	137355	.	-	.	gene_id "SPNCRNA.610"; transcript_id "SPNCRNA.610.1"; exon_number "1"; gene_name "SPAC11D3.15-antisense-1"; gene_source "PomBase"; gene_biotype "ncRNA"; transcript_name "SPAC11D3.15-antisense-1"; transcript_source "PomBase"; transcript_biotype "ncRNA"; exon_id "SPNCRNA.610.1:exon:1";
I	PomBase	gene	140381	141653	.	-	.	gene_id "SPAC11D3.16c"; gene_name "SPAC11D3.16c"; gene_source "PomBase"; gene_biotype "protein_coding";
I	PomBase	transcript	140381	141653	.	-	.	gene_id "SPAC11D3.16c"; transcript_id "SPAC11D3.16c.1"; gene_name "SPAC11D3.16c"; gene_source "PomBase"; gene_biotype "protein_coding"; transcript_name "SPAC11D3.16c.1"; transcript_source "PomBase"; transcript_biotype "protein_coding";
I	PomBase	exon	140381	141653	.	-	.	gene_id "SPAC11D3.16c"; transcript_id "SPAC11D3.16c.1"; exon_number "1"; gene_name "SPAC11D3.16c"; gene_source "PomBase"; gene_biotype "protein_coding"; transcript_name "SPAC11D3.16c.1"; transcript_source "PomBase"; transcript_biotype "protein_coding"; exon_id "SPAC11D3.16c.1:exon:1";
I	PomBase	CDS	140805	141200	.	-	0	gene_id "SPAC11D3.16c"; transcript_id "SPAC11D3.16c.1"; exon_number "1"; gene_name "SPAC11D3.16c"; gene_source "PomBase"; gene_biotype "protein_coding"; transcript_name "SPAC11D3.16c.1"; transcript_source "PomBase"; transcript_biotype "protein_coding"; protein_id "SPAC11D3.16c.1:pep";
I	PomBase	start_codon	141198	141200	.	-	0	gene_id "SPAC11D3.16c"; transcript_id "SPAC11D3.16c.1"; exon_number "1"; gene_name "SPAC11D3.16c"; gene_source "PomBase"; gene_biotype "protein_coding"; transcript_name "SPAC11D3.16c.1"; transcript_source "PomBase"; transcript_biotype "protein_coding";
I	PomBase	five_prime_utr	141201	141653	.	-	.	gene_id "SPAC11D3.16c"; transcript_id "SPAC11D3.16c.1"; gene_name "SPAC11D3.16c"; gene_source "PomBase"; gene_biotype "protein_coding"; transcript_name "SPAC11D3.16c.1"; transcript_source "PomBase"; transcript_biotype "protein_coding";
I	PomBase	three_prime_utr	140381	140804	.	-	.	gene_id "SPAC11D3.16c"; transcript_id "SPAC11D3.16c.1"; gene_name "SPAC11D3.16c"; gene_source "PomBase"; gene_biotype "protein_coding"; transcript_name "SPAC11D3.16c.1"; transcript_source "PomBase"; transcript_biotype "protein_coding";
I	PomBase	gene	141199	144768	.	+	.	gene_id "SPAC11D3.17"; gene_name "SPAC11D3.17"; gene_source "PomBase"; gene_biotype "protein_coding";
I	PomBase	transcript	141199	144768	.	+	.	gene_id "SPAC11D3.17"; transcript_id "SPAC11D3.17.1"; gene_name "SPAC11D3.17"; gene_source "PomBase"; gene_biotype "protein_coding"; transcript_name "SPAC11D3.17.1"; transcript_source "PomBase"; transcript_biotype "protein_coding";
I	PomBase	exon	141199	141510	.	+	.	gene_id "SPAC11D3.17"; transcript_id "SPAC11D3.17.1"; exon_number "1"; gene_name "SPAC11D3.17"; gene_source "PomBase"; gene_biotype "protein_coding"; transcript_name "SPAC11D3.17.1"; transcript_source "PomBase"; transcript_biotype "protein_coding"; exon_id "SPAC11D3.17.1:five_prime_UTR:1";
I	PomBase	exon	141559	144768	.	+	.	gene_id "SPAC11D3.17"; transcript_id "SPAC11D3.17.1"; exon_number "2"; gene_name "SPAC11D3.17"; gene_source "PomBase"; gene_biotype "protein_coding"; transcript_name "SPAC11D3.17.1"; transcript_source "PomBase"; transcript_biotype "protein_coding"; exon_id "SPAC11D3.17.1:exon:1";
I	PomBase	CDS	142675	144429	.	+	0	gene_id "SPAC11D3.17"; transcript_id "SPAC11D3.17.1"; exon_number "2"; gene_name "SPAC11D3.17"; gene_source "PomBase"; gene_biotype "protein_coding"; transcript_name "SPAC11D3.17.1"; transcript_source "PomBase"; transcript_biotype "protein_coding"; protein_id "SPAC11D3.17.1:pep";
I	PomBase	start_codon	142675	142677	.	+	0	gene_id "SPAC11D3.17"; transcript_id "SPAC11D3.17.1"; exon_number "2"; gene_name "SPAC11D3.17"; gene_source "PomBase"; gene_biotype "protein_coding"; transcript_name "SPAC11D3.17.1"; transcript_source "PomBase"; transcript_biotype "protein_coding";
I	PomBase	stop_codon	144430	144432	.	+	0	gene_id "SPAC11D3.17"; transcript_id "SPAC11D3.17.1"; exon_number "2"; gene_name "SPAC11D3.17"; gene_source "PomBase"; gene_biotype "protein_coding"; transcript_name "SPAC11D3.17.1"; transcript_source "PomBase"; transcript_biotype "protein_coding";
I	PomBase	five_prime_utr	141199	141510	.	+	.	gene_id "SPAC11D3.17"; transcript_id "SPAC11D3.17.1"; gene_name "SPAC11D3.17"; gene_source "PomBase"; gene_biotype "protein_coding"; transcript_name "SPAC11D3.17.1"; transcript_source "PomBase"; transcript_biotype "protein_coding";
I	PomBase	five_prime_utr	141559	142674	.	+	.	gene_id "SPAC11D3.17"; transcript_id "SPAC11D3.17.1"; gene_name "SPAC11D3.17"; gene_source "PomBase"; gene_biotype "protein_coding"; transcript_name "SPAC11D3.17.1"; transcript_source "PomBase"; transcript_biotype "protein_coding";
I	PomBase	three_prime_utr	144433	144768	.	+	.	gene_id "SPAC11D3.17"; transcript_id "SPAC11D3.17.1"; gene_name "SPAC11D3.17"; gene_source "PomBase"; gene_biotype "protein_coding"; transcript_name "SPAC11D3.17.1"; transcript_source "PomBase"; transcript_biotype "protein_coding";
I	PomBase	gene	144733	146501	.	+	.	gene_id "SPNCRNA.611"; gene_name "SPAC11D3.18c-antisense-1"; gene_source "PomBase"; gene_biotype "ncRNA";
I	PomBase	transcript	144733	146501	.	+	.	gene_id "SPNCRNA.611"; transcript_id "SPNCRNA.611.1"; gene_name "SPAC11D3.18c-antisense-1"; gene_source "PomBase"; gene_biotype "ncRNA"; transcript_name "SPAC11D3.18c-antisense-1"; transcript_source "PomBase"; transcript_biotype "ncRNA";
I	PomBase	exon	144733	146501	.	+	.	gene_id "SPNCRNA.611"; transcript_id "SPNCRNA.611.1"; exon_number "1"; gene_name "SPAC11D3.18c-antisense-1"; gene_source "PomBase"; gene_biotype "ncRNA"; transcript_name "SPAC11D3.18c-antisense-1"; transcript_source "PomBase"; transcript_biotype "ncRNA"; exon_id "SPNCRNA.611.1:exon:1";
I	PomBase	gene	144819	146935	.	-	.	gene_id "SPAC11D3.18c"; gene_name "SPAC11D3.18c"; gene_source "PomBase"; gene_biotype "protein_coding";
I	PomBase	transcript	144819	146935	.	-	.	gene_id "SPAC11D3.18c"; transcript_id "SPAC11D3.18c.1"; gene_name "SPAC11D3.18c"; gene_source "PomBase"; gene_biotype "protein_coding"; transcript_name "SPAC11D3.18c.1"; transcript_source "PomBase"; transcript_biotype "protein_coding";
I	PomBase	exon	146912	146935	.	-	.	gene_id "SPAC11D3.18c"; transcript_id "SPAC11D3.18c.1"; exon_number "1"; gene_name "SPAC11D3.18c"; gene_source "PomBase"; gene_biotype "protein_coding"; transcript_name "SPAC11D3.18c.1"; transcript_source "PomBase"; transcript_biotype "protein_coding"; exon_id "SPAC11D3.18c.1:five_prime_UTR:1";
I	PomBase	exon	144819	146869	.	-	.	gene_id "SPAC11D3.18c"; transcript_id "SPAC11D3.18c.1"; exon_number "2"; gene_name "SPAC11D3.18c"; gene_source "PomBase"; gene_biotype "protein_coding"; transcript_name "SPAC11D3.18c.1"; transcript_source "PomBase"; transcript_biotype "protein_coding"; exon_id "SPAC11D3.18c.1:exon:1";
I	PomBase	CDS	144862	146358	.	-	0	gene_id "SPAC11D3.18c"; transcript_id "SPAC11D3.18c.1"; exon_number "2"; gene_name "SPAC11D3.18c"; gene_source "PomBase"; gene_biotype "protein_coding"; transcript_name "SPAC11D3.18c.1"; transcript_source "PomBase"; transcript_biotype "protein_coding"; protein_id "SPAC11D3.18c.1:pep";
I	PomBase	start_codon	146356	146358	.	-	0	gene_id "SPAC11D3.18c"; transcript_id "SPAC11D3.18c.1"; exon_number "2"; gene_name "SPAC11D3.18c"; gene_source "PomBase"; gene_biotype "protein_coding"; transcript_name "SPAC11D3.18c.1"; transcript_source "PomBase"; transcript_biotype "protein_coding";
I	PomBase	five_prime_utr	146912	146935	.	-	.	gene_id "SPAC11D3.18c"; transcript_id "SPAC11D3.18c.1"; gene_name "SPAC11D3.18c"; gene_source "PomBase"; gene_biotype "protein_coding"; transcript_name "SPAC11D3.18c.1"; transcript_source "PomBase"; transcript_biotype "protein_coding";
I	PomBase	five_prime_utr	146359	146869	.	-	.	gene_id "SPAC11D3.18c"; transcript_id "SPAC11D3.18c.1"; gene_name "SPAC11D3.18c"; gene_source "PomBase"; gene_biotype "protein_coding"; transcript_name "SPAC11D3.18c.1"; transcript_source "PomBase"; transcript_biotype "protein_coding";
I	PomBase	three_prime_utr	144819	144861	.	-	.	gene_id "SPAC11D3.18c"; transcript_id "SPAC11D3.18c.1"; gene_name "SPAC11D3.18c"; gene_source "PomBase"; gene_biotype "protein_coding"; transcript_name "SPAC11D3.18c.1"; transcript_source "PomBase"; transcript_biotype "protein_coding";
I	PomBase	gene	146871	148041	.	-	.	gene_id "SPNCRNA.612"; gene_name "SPAC5H10.01-antisense-1"; gene_source "PomBase"; gene_biotype "ncRNA";
I	PomBase	transcript	146871	148041	.	-	.	gene_id "SPNCRNA.612"; transcript_id "SPNCRNA.612.1"; gene_name "SPAC5H10.01-antisense-1"; gene_source "PomBase"; gene_biotype "ncRNA"; transcript_name "SPAC5H10.01-antisense-1"; transcript_source "PomBase"; transcript_biotype "ncRNA";
I	PomBase	exon	146871	148041	.	-	.	gene_id "SPNCRNA.612"; transcript_id "SPNCRNA.612.1"; exon_number "1"; gene_name "SPAC5H10.01-antisense-1"; gene_source "PomBase"; gene_biotype "ncRNA"; transcript_name "SPAC5H10.01-antisense-1"; transcript_source "PomBase"; transcript_biotype "ncRNA"; exon_id "SPNCRNA.612.1:exon:1";
I	PomBase	gene	146974	148055	.	+	.	gene_id "SPAC5H10.01"; gene_name "SPAC5H10.01"; gene_source "PomBase"; gene_biotype "protein_coding";
I	PomBase	transcript	146974	148055	.	+	.	gene_id "SPAC5H10.01"; transcript_id "SPAC5H10.01.1"; gene_name "SPAC5H10.01"; gene_source "PomBase"; gene_biotype "protein_coding"; transcript_name "SPAC5H10.01.1"; transcript_source "PomBase"; transcript_biotype "protein_coding";
I	PomBase	exon	146974	148055	.	+	.	gene_id "SPAC5H10.01"; transcript_id "SPAC5H10.01.1"; exon_number "1"; gene_name "SPAC5H10.01"; gene_source "PomBase"; gene_biotype "protein_coding"; transcript_name "SPAC5H10.01.1"; transcript_source "PomBase"; transcript_biotype "protein_coding"; exon_id "SPAC5H10.01.1:exon:1";
I	PomBase	CDS	146974	147879	.	+	0	gene_id "SPAC5H10.01"; transcript_id "SPAC5H10.01.1"; exon_number "1"; gene_name "SPAC5H10.01"; gene_source "PomBase"; gene_biotype "protein_coding"; transcript_name "SPAC5H10.01.1"; transcript_source "PomBase"; transcript_biotype "protein_coding"; protein_id "SPAC5H10.01.1:pep";
I	PomBase	start_codon	146974	146976	.	+	0	gene_id "SPAC5H10.01"; transcript_id "SPAC5H10.01.1"; exon_number "1"; gene_name "SPAC5H10.01"; gene_source "PomBase"; gene_biotype "protein_coding"; transcript_name "SPAC5H10.01.1"; transcript_source "PomBase"; transcript_biotype "protein_coding";
I	PomBase	three_prime_utr	147880	148055	.	+	.	gene_id "SPAC5H10.01"; transcript_id "SPAC5H10.01.1"; gene_name "SPAC5H10.01"; gene_source "PomBase"; gene_biotype "protein_coding"; transcript_name "SPAC5H10.01.1"; transcript_source "PomBase"; transcript_biotype "protein_coding";
I	PomBase	gene	148038	150331	.	-	.	gene_id "SPAC5H10.02c"; gene_name "hsp3102"; gene_source "PomBase"; gene_biotype "protein_coding";
I	PomBase	transcript	148038	150331	.	-	.	gene_id "SPAC5H10.02c"; transcript_id "SPAC5H10.02c.1"; gene_name "hsp3102"; gene_source "PomBase"; gene_biotype "protein_coding"; transcript_name "hsp3102"; transcript_source "PomBase"; transcript_biotype "protein_coding";
I	PomBase	exon	148038	150331	.	-	.	gene_id "SPAC5H10.02c"; transcript_id "SPAC5H10.02c.1"; exon_number "1"; gene_name "hsp3102"; gene_source "PomBase"; gene_biotype "protein_coding"; transcript_name "hsp3102"; transcript_source "PomBase"; transcript_biotype "protein_coding"; exon_id "SPAC5H10.02c.1:exon:1";
I	PomBase	CDS	148213	148935	.	-	0	gene_id "SPAC5H10.02c"; transcript_id "SPAC5H10.02c.1"; exon_number "1"; gene_name "hsp3102"; gene_source "PomBase"; gene_biotype "protein_coding"; transcript_name "hsp3102"; transcript_source "PomBase"; transcript_biotype "protein_coding"; protein_id "SPAC5H10.02c.1:pep";
I	PomBase	start_codon	148933	148935	.	-	0	gene_id "SPAC5H10.02c"; transcript_id "SPAC5H10.02c.1"; exon_number "1"; gene_name "hsp3102"; gene_source "PomBase"; gene_biotype "protein_coding"; transcript_name "hsp3102"; transcript_source "PomBase"; transcript_biotype "protein_coding";
I	PomBase	five_prime_utr	148936	150331	.	-	.	gene_id "SPAC5H10.02c"; transcript_id "SPAC5H10.02c.1"; gene_name "hsp3102"; gene_source "PomBase"; gene_biotype "protein_coding"; transcript_name "hsp3102"; transcript_source "PomBase"; transcript_biotype "protein_coding";
I	PomBase	three_prime_utr	148038	148212	.	-	.	gene_id "SPAC5H10.02c"; transcript_id "SPAC5H10.02c.1"; gene_name "hsp3102"; gene_source "PomBase"; gene_biotype "protein_coding"; transcript_name "hsp3102"; transcript_source "PomBase"; transcript_biotype "protein_coding";
I	PomBase	gene	148362	149005	.	+	.	gene_id "SPNCRNA.613"; gene_name "hsp3102-antisense-1"; gene_source "PomBase"; gene_biotype "ncRNA";
I	PomBase	transcript	148362	149005	.	+	.	gene_id "SPNCRNA.613"; transcript_id "SPNCRNA.613.1"; gene_name "hsp3102-antisense-1"; gene_source "PomBase"; gene_biotype "ncRNA"; transcript_name "hsp3102-antisense-1"; transcript_source "PomBase"; transcript_biotype "ncRNA";
I	PomBase	exon	148362	149005	.	+	.	gene_id "SPNCRNA.613"; transcript_id "SPNCRNA.613.1"; exon_number "1"; gene_name "hsp3102-antisense-1"; gene_source "PomBase"; gene_biotype "ncRNA"; transcript_name "hsp3102-antisense-1"; transcript_source "PomBase"; transcript_biotype "ncRNA"; exon_id "SPNCRNA.613.1:exon:1";
I	PomBase	gene	149446	152909	.	+	.	gene_id "SPAC5H10.03"; gene_name "SPAC5H10.03"; gene_source "PomBase"; gene_biotype "protein_coding";
I	PomBase	transcript	149446	152909	.	+	.	gene_id "SPAC5H10.03"; transcript_id "SPAC5H10.03.1"; gene_name "SPAC5H10.03"; gene_source "PomBase"; gene_biotype "protein_coding"; transcript_name "SPAC5H10.03.1"; transcript_source "PomBase"; transcript_biotype "protein_coding";
I	PomBase	exon	149446	152909	.	+	.	gene_id "SPAC5H10.03"; transcript_id "SPAC5H10.03.1"; exon_number "1"; gene_name "SPAC5H10.03"; gene_source "PomBase"; gene_biotype "protein_coding"; transcript_name "SPAC5H10.03.1"; transcript_source "PomBase"; transcript_biotype "protein_coding"; exon_id "SPAC5H10.03.1:exon:1";
I	PomBase	CDS	151913	152572	.	+	0	gene_id "SPAC5H10.03"; transcript_id "SPAC5H10.03.1"; exon_number "1"; gene_name "SPAC5H10.03"; gene_source "PomBase"; gene_biotype "protein_coding"; transcript_name "SPAC5H10.03.1"; transcript_source "PomBase"; transcript_biotype "protein_coding"; protein_id "SPAC5H10.03.1:pep";
I	PomBase	start_codon	151913	151915	.	+	0	gene_id "SPAC5H10.03"; transcript_id "SPAC5H10.03.1"; exon_number "1"; gene_name "SPAC5H10.03"; gene_source "PomBase"; gene_biotype "protein_coding"; transcript_name "SPAC5H10.03.1"; transcript_source "PomBase"; transcript_biotype "protein_coding";
I	PomBase	five_prime_utr	149446	151912	.	+	.	gene_id "SPAC5H10.03"; transcript_id "SPAC5H10.03.1"; gene_name "SPAC5H10.03"; gene_source "PomBase"; gene_biotype "protein_coding"; transcript_name "SPAC5H10.03.1"; transcript_source "PomBase"; transcript_biotype "protein_coding";
I	PomBase	three_prime_utr	152573	152909	.	+	.	gene_id "SPAC5H10.03"; transcript_id "SPAC5H10.03.1"; gene_name "SPAC5H10.03"; gene_source "PomBase"; gene_biotype "protein_coding"; transcript_name "SPAC5H10.03.1"; transcript_source "PomBase"; transcript_biotype "protein_coding";
I	PomBase	gene	149658	149776	.	+	.	gene_id "SPRRNA.10"; gene_name "SPRRNA.10"; gene_source "PomBase"; gene_biotype "rRNA";
I	PomBase	transcript	149658	149776	.	+	.	gene_id "SPRRNA.10"; transcript_id "SPRRNA.10.1"; gene_name "SPRRNA.10"; gene_source "PomBase"; gene_biotype "rRNA"; transcript_name "SPRRNA.10.1"; transcript_source "PomBase"; transcript_biotype "rRNA";
I	PomBase	exon	149658	149776	.	+	.	gene_id "SPRRNA.10"; transcript_id "SPRRNA.10.1"; exon_number "1"; gene_name "SPRRNA.10"; gene_source "PomBase"; gene_biotype "rRNA"; transcript_name "SPRRNA.10.1"; transcript_source "PomBase"; transcript_biotype "rRNA"; exon_id "SPRRNA.10.1:exon:1";
I	PomBase	gene	152851	155515	.	+	.	gene_id "SPAC5H10.04"; gene_name "SPAC5H10.04"; gene_source "PomBase"; gene_biotype "protein_coding";
I	PomBase	transcript	152851	155515	.	+	.	gene_id "SPAC5H10.04"; transcript_id "SPAC5H10.04.1"; gene_name "SPAC5H10.04"; gene_source "PomBase"; gene_biotype "protein_coding"; transcript_name "SPAC5H10.04.1"; transcript_source "PomBase"; transcript_biotype "protein_coding";
I	PomBase	exon	152851	155515	.	+	.	gene_id "SPAC5H10.04"; transcript_id "SPAC5H10.04.1"; exon_number "1"; gene_name "SPAC5H10.04"; gene_source "PomBase"; gene_biotype "protein_coding"; transcript_name "SPAC5H10.04.1"; transcript_source "PomBase"; transcript_biotype "protein_coding"; exon_id "SPAC5H10.04.1:exon:1";
I	PomBase	CDS	153387	154535	.	+	0	gene_id "SPAC5H10.04"; transcript_id "SPAC5H10.04.1"; exon_number "1"; gene_name "SPAC5H10.04"; gene_source "PomBase"; gene_biotype "protein_coding"; transcript_name "SPAC5H10.04.1"; transcript_source "PomBase"; transcript_biotype "protein_coding"; protein_id "SPAC5H10.04.1:pep";
I	PomBase	start_codon	153387	153389	.	+	0	gene_id "SPAC5H10.04"; transcript_id "SPAC5H10.04.1"; exon_number "1"; gene_name "SPAC5H10.04"; gene_source "PomBase"; gene_biotype "protein_coding"; transcript_name "SPAC5H10.04.1"; transcript_source "PomBase"; transcript_biotype "protein_coding";
I	PomBase	five_prime_utr	152851	153386	.	+	.	gene_id "SPAC5H10.04"; transcript_id "SPAC5H10.04.1"; gene_name "SPAC5H10.04"; gene_source "PomBase"; gene_biotype "protein_coding"; transcript_name "SPAC5H10.04.1"; transcript_source "PomBase"; transcript_biotype "protein_coding";
I	PomBase	three_prime_utr	154536	155515	.	+	.	gene_id "SPAC5H10.04"; transcript_id "SPAC5H10.04.1"; gene_name "SPAC5H10.04"; gene_source "PomBase"; gene_biotype "protein_coding"; transcript_name "SPAC5H10.04.1"; transcript_source "PomBase"; transcript_biotype "protein_coding";
I	PomBase	gene	153070	155583	.	-	.	gene_id "SPAC5H10.05c"; gene_name "SPAC5H10.05c"; gene_source "PomBase"; gene_biotype "protein_coding";
I	PomBase	transcript	153070	155583	.	-	.	gene_id "SPAC5H10.05c"; transcript_id "SPAC5H10.05c.1"; gene_name "SPAC5H10.05c"; gene_source "PomBase"; gene_biotype "protein_coding"; transcript_name "SPAC5H10.05c.1"; transcript_source "PomBase"; transcript_biotype "protein_coding";
I	PomBase	exon	153070	155583	.	-	.	gene_id "SPAC5H10.05c"; transcript_id "SPAC5H10.05c.1"; exon_number "1"; gene_name "SPAC5H10.05c"; gene_source "PomBase"; gene_biotype "protein_coding"; transcript_name "SPAC5H10.05c.1"; transcript_source "PomBase"; transcript_biotype "protein_coding"; exon_id "SPAC5H10.05c.1:exon:1";
I	PomBase	CDS	154810	155397	.	-	0	gene_id "SPAC5H10.05c"; transcript_id "SPAC5H10.05c.1"; exon_number "1"; gene_name "SPAC5H10.05c"; gene_source "PomBase"; gene_biotype "protein_coding"; transcript_name "SPAC5H10.05c.1"; transcript_source "PomBase"; transcript_biotype "protein_coding"; protein_id "SPAC5H10.05c.1:pep";
I	PomBase	start_codon	155395	155397	.	-	0	gene_id "SPAC5H10.05c"; transcript_id "SPAC5H10.05c.1"; exon_number "1"; gene_name "SPAC5H10.05c"; gene_source "PomBase"; gene_biotype "protein_coding"; transcript_name "SPAC5H10.05c.1"; transcript_source "PomBase"; transcript_biotype "protein_coding";
I	PomBase	stop_codon	154807	154809	.	-	0	gene_id "SPAC5H10.05c"; transcript_id "SPAC5H10.05c.1"; exon_number "1"; gene_name "SPAC5H10.05c"; gene_source "PomBase"; gene_biotype "protein_coding"; transcript_name "SPAC5H10.05c.1"; transcript_source "PomBase"; transcript_biotype "protein_coding";
I	PomBase	five_prime_utr	155398	155583	.	-	.	gene_id "SPAC5H10.05c"; transcript_id "SPAC5H10.05c.1"; gene_name "SPAC5H10.05c"; gene_source "PomBase"; gene_biotype "protein_coding"; transcript_name "SPAC5H10.05c.1"; transcript_source "PomBase"; transcript_biotype "protein_coding";
I	PomBase	three_prime_utr	153070	154806	.	-	.	gene_id "SPAC5H10.05c"; transcript_id "SPAC5H10.05c.1"; gene_name "SPAC5H10.05c"; gene_source "PomBase"; gene_biotype "protein_coding"; transcript_name "SPAC5H10.05c.1"; transcript_source "PomBase"; transcript_biotype "protein_coding";
I	PomBase	gene	156430	158307	.	-	.	gene_id "SPAC5H10.06c"; gene_name "adh4"; gene_source "PomBase"; gene_biotype "protein_coding";
I	PomBase	transcript	156430	158307	.	-	.	gene_id "SPAC5H10.06c"; transcript_id "SPAC5H10.06c.1"; gene_name "adh4"; gene_source "PomBase"; gene_biotype "protein_coding"; transcript_name "adh4"; transcript_source "PomBase"; transcript_biotype "protein_coding";
I	PomBase	exon	156430	158307	.	-	.	gene_id "SPAC5H10.06c"; transcript_id "SPAC5H10.06c.1"; exon_number "1"; gene_name "adh4"; gene_source "PomBase"; gene_biotype "protein_coding"; transcript_name "adh4"; transcript_source "PomBase"; transcript_biotype "protein_coding"; exon_id "SPAC5H10.06c.1:exon:1";
I	PomBase	CDS	156548	157687	.	-	0	gene_id "SPAC5H10.06c"; transcript_id "SPAC5H10.06c.1"; exon_number "1"; gene_name "adh4"; gene_source "PomBase"; gene_biotype "protein_coding"; transcript_name "adh4"; transcript_source "PomBase"; transcript_biotype "protein_coding"; protein_id "SPAC5H10.06c.1:pep";
I	PomBase	start_codon	157685	157687	.	-	0	gene_id "SPAC5H10.06c"; transcript_id "SPAC5H10.06c.1"; exon_number "1"; gene_name "adh4"; gene_source "PomBase"; gene_biotype "protein_coding"; transcript_name "adh4"; transcript_source "PomBase"; transcript_biotype "protein_coding";
I	PomBase	five_prime_utr	157688	158307	.	-	.	gene_id "SPAC5H10.06c"; transcript_id "SPAC5H10.06c.1"; gene_name "adh4"; gene_source "PomBase"; gene_biotype "protein_coding"; transcript_name "adh4"; transcript_source "PomBase"; transcript_biotype "protein_coding";
I	PomBase	three_prime_utr	156430	156547	.	-	.	gene_id "SPAC5H10.06c"; transcript_id "SPAC5H10.06c.1"; gene_name "adh4"; gene_source "PomBase"; gene_biotype "protein_coding"; transcript_name "adh4"; transcript_source "PomBase"; transcript_biotype "protein_coding";
I	PomBase	gene	158777	159472	.	+	.	gene_id "SPAC5H10.07"; gene_name "SPAC5H10.07"; gene_source "PomBase"; gene_biotype "protein_coding";
I	PomBase	transcript	158777	159472	.	+	.	gene_id "SPAC5H10.07"; transcript_id "SPAC5H10.07.1"; gene_name "SPAC5H10.07"; gene_source "PomBase"; gene_biotype "protein_coding"; transcript_name "SPAC5H10.07.1"; transcript_source "PomBase"; transcript_biotype "protein_coding";
I	PomBase	exon	158777	159472	.	+	.	gene_id "SPAC5H10.07"; transcript_id "SPAC5H10.07.1"; exon_number "1"; gene_name "SPAC5H10.07"; gene_source "PomBase"; gene_biotype "protein_coding"; transcript_name "SPAC5H10.07.1"; transcript_source "PomBase"; transcript_biotype "protein_coding"; exon_id "SPAC5H10.07.1:exon:1";
I	PomBase	CDS	159203	159469	.	+	0	gene_id "SPAC5H10.07"; transcript_id "SPAC5H10.07.1"; exon_number "1"; gene_name "SPAC5H10.07"; gene_source "PomBase"; gene_biotype "protein_coding"; transcript_name "SPAC5H10.07.1"; transcript_source "PomBase"; transcript_biotype "protein_coding"; protein_id "SPAC5H10.07.1:pep";
I	PomBase	start_codon	159203	159205	.	+	0	gene_id "SPAC5H10.07"; transcript_id "SPAC5H10.07.1"; exon_number "1"; gene_name "SPAC5H10.07"; gene_source "PomBase"; gene_biotype "protein_coding"; transcript_name "SPAC5H10.07.1"; transcript_source "PomBase"; transcript_biotype "protein_coding";
I	PomBase	stop_codon	159470	159472	.	+	0	gene_id "SPAC5H10.07"; transcript_id "SPAC5H10.07.1"; exon_number "1"; gene_name "SPAC5H10.07"; gene_source "PomBase"; gene_biotype "protein_coding"; transcript_name "SPAC5H10.07.1"; transcript_source "PomBase"; transcript_biotype "protein_coding";
I	PomBase	five_prime_utr	158777	159202	.	+	.	gene_id "SPAC5H10.07"; transcript_id "SPAC5H10.07.1"; gene_name "SPAC5H10.07"; gene_source "PomBase"; gene_biotype "protein_coding"; transcript_name "SPAC5H10.07.1"; transcript_source "PomBase"; transcript_biotype "protein_coding";
I	PomBase	gene	159880	160945	.	-	.	gene_id "SPAC5H10.08c"; gene_name "pan6"; gene_source "PomBase"; gene_biotype "protein_coding";
I	PomBase	transcript	159880	160945	.	-	.	gene_id "SPAC5H10.08c"; transcript_id "SPAC5H10.08c.1"; gene_name "pan6"; gene_source "PomBase"; gene_biotype "protein_coding"; transcript_name "pan6"; transcript_source "PomBase"; transcript_biotype "protein_coding";
I	PomBase	exon	159880	160945	.	-	.	gene_id "SPAC5H10.08c"; transcript_id "SPAC5H10.08c.1"; exon_number "1"; gene_name "pan6"; gene_source "PomBase"; gene_biotype "protein_coding"; transcript_name "pan6"; transcript_source "PomBase"; transcript_biotype "protein_coding"; exon_id "SPAC5H10.08c.1:exon:1";
I	PomBase	CDS	160094	160945	.	-	0	gene_id "SPAC5H10.08c"; transcript_id "SPAC5H10.08c.1"; exon_number "1"; gene_name "pan6"; gene_source "PomBase"; gene_biotype "protein_coding"; transcript_name "pan6"; transcript_source "PomBase"; transcript_biotype "protein_coding"; protein_id "SPAC5H10.08c.1:pep";
I	PomBase	start_codon	160943	160945	.	-	0	gene_id "SPAC5H10.08c"; transcript_id "SPAC5H10.08c.1"; exon_number "1"; gene_name "pan6"; gene_source "PomBase"; gene_biotype "protein_coding"; transcript_name "pan6"; transcript_source "PomBase"; transcript_biotype "protein_coding";
I	PomBase	three_prime_utr	159880	160093	.	-	.	gene_id "SPAC5H10.08c"; transcript_id "SPAC5H10.08c.1"; gene_name "pan6"; gene_source "PomBase"; gene_biotype "protein_coding"; transcript_name "pan6"; transcript_source "PomBase"; transcript_biotype "protein_coding";
I	PomBase	gene	160977	161822	.	-	.	gene_id "SPAC5H10.09c"; gene_name "ecm31"; gene_source "PomBase"; gene_biotype "protein_coding";
I	PomBase	transcript	160977	161822	.	-	.	gene_id "SPAC5H10.09c"; transcript_id "SPAC5H10.09c.1"; gene_name "ecm31"; gene_source "PomBase"; gene_biotype "protein_coding"; transcript_name "ecm31"; transcript_source "PomBase"; transcript_biotype "protein_coding";
I	PomBase	exon	160977	161822	.	-	.	gene_id "SPAC5H10.09c"; transcript_id "SPAC5H10.09c.1"; exon_number "1"; gene_name "ecm31"; gene_source "PomBase"; gene_biotype "protein_coding"; transcript_name "ecm31"; transcript_source "PomBase"; transcript_biotype "protein_coding"; exon_id "SPAC5H10.09c.1:exon:1";
I	PomBase	CDS	160980	161780	.	-	0	gene_id "SPAC5H10.09c"; transcript_id "SPAC5H10.09c.1"; exon_number "1"; gene_name "ecm31"; gene_source "PomBase"; gene_biotype "protein_coding"; transcript_name "ecm31"; transcript_source "PomBase"; transcript_biotype "protein_coding"; protein_id "SPAC5H10.09c.1:pep";
I	PomBase	start_codon	161778	161780	.	-	0	gene_id "SPAC5H10.09c"; transcript_id "SPAC5H10.09c.1"; exon_number "1"; gene_name "ecm31"; gene_source "PomBase"; gene_biotype "protein_coding"; transcript_name "ecm31"; transcript_source "PomBase"; transcript_biotype "protein_coding";
I	PomBase	stop_codon	160977	160979	.	-	0	gene_id "SPAC5H10.09c"; transcript_id "SPAC5H10.09c.1"; exon_number "1"; gene_name "ecm31"; gene_source "PomBase"; gene_biotype "protein_coding"; transcript_name "ecm31"; transcript_source "PomBase"; transcript_biotype "protein_coding";
I	PomBase	five_prime_utr	161781	161822	.	-	.	gene_id "SPAC5H10.09c"; transcript_id "SPAC5H10.09c.1"; gene_name "ecm31"; gene_source "PomBase"; gene_biotype "protein_coding"; transcript_name "ecm31"; transcript_source "PomBase"; transcript_biotype "protein_coding";
I	PomBase	gene	161072	162819	.	+	.	gene_id "SPNCRNA.614"; gene_name "SPAC5H10.09c-antisense-1"; gene_source "PomBase"; gene_biotype "ncRNA";
I	PomBase	transcript	161072	162819	.	+	.	gene_id "SPNCRNA.614"; transcript_id "SPNCRNA.614.1"; gene_name "SPAC5H10.09c-antisense-1"; gene_source "PomBase"; gene_biotype "ncRNA"; transcript_name "SPAC5H10.09c-antisense-1"; transcript_source "PomBase"; transcript_biotype "ncRNA";
I	PomBase	exon	161072	162819	.	+	.	gene_id "SPNCRNA.614"; transcript_id "SPNCRNA.614.1"; exon_number "1"; gene_name "SPAC5H10.09c-antisense-1"; gene_source "PomBase"; gene_biotype "ncRNA"; transcript_name "SPAC5H10.09c-antisense-1"; transcript_source "PomBase"; transcript_biotype "ncRNA"; exon_id "SPNCRNA.614.1:exon:1";
I	PomBase	gene	162257	164455	.	-	.	gene_id "SPNCRNA.615"; gene_name "SPAC5H10.10-antisense-1"; gene_source "PomBase"; gene_biotype "ncRNA";
I	PomBase	transcript	162257	164455	.	-	.	gene_id "SPNCRNA.615"; transcript_id "SPNCRNA.615.1"; gene_name "SPAC5H10.10-antisense-1"; gene_source "PomBase"; gene_biotype "ncRNA"; transcript_name "SPAC5H10.10-antisense-1"; transcript_source "PomBase"; transcript_biotype "ncRNA";
I	PomBase	exon	162257	164455	.	-	.	gene_id "SPNCRNA.615"; transcript_id "SPNCRNA.615.1"; exon_number "1"; gene_name "SPAC5H10.10-antisense-1"; gene_source "PomBase"; gene_biotype "ncRNA"; transcript_name "SPAC5H10.10-antisense-1"; transcript_source "PomBase"; transcript_biotype "ncRNA"; exon_id "SPNCRNA.615.1:exon:1";
I	PomBase	gene	162756	164635	.	+	.	gene_id "SPAC5H10.10"; gene_name "SPAC5H10.10"; gene_source "PomBase"; gene_biotype "protein_coding";
I	PomBase	transcript	162756	164635	.	+	.	gene_id "SPAC5H10.10"; transcript_id "SPAC5H10.10.1"; gene_name "SPAC5H10.10"; gene_source "PomBase"; gene_biotype "protein_coding"; transcript_name "SPAC5H10.10.1"; transcript_source "PomBase"; transcript_biotype "protein_coding";
I	PomBase	exon	162756	164635	.	+	.	gene_id "SPAC5H10.10"; transcript_id "SPAC5H10.10.1"; exon_number "1"; gene_name "SPAC5H10.10"; gene_source "PomBase"; gene_biotype "protein_coding"; transcript_name "SPAC5H10.10.1"; transcript_source "PomBase"; transcript_biotype "protein_coding"; exon_id "SPAC5H10.10.1:exon:1";
I	PomBase	CDS	162960	164138	.	+	0	gene_id "SPAC5H10.10"; transcript_id "SPAC5H10.10.1"; exon_number "1"; gene_name "SPAC5H10.10"; gene_source "PomBase"; gene_biotype "protein_coding"; transcript_name "SPAC5H10.10.1"; transcript_source "PomBase"; transcript_biotype "protein_coding"; protein_id "SPAC5H10.10.1:pep";
I	PomBase	start_codon	162960	162962	.	+	0	gene_id "SPAC5H10.10"; transcript_id "SPAC5H10.10.1"; exon_number "1"; gene_name "SPAC5H10.10"; gene_source "PomBase"; gene_biotype "protein_coding"; transcript_name "SPAC5H10.10.1"; transcript_source "PomBase"; transcript_biotype "protein_coding";
I	PomBase	five_prime_utr	162756	162959	.	+	.	gene_id "SPAC5H10.10"; transcript_id "SPAC5H10.10.1"; gene_name "SPAC5H10.10"; gene_source "PomBase"; gene_biotype "protein_coding"; transcript_name "SPAC5H10.10.1"; transcript_source "PomBase"; transcript_biotype "protein_coding";
I	PomBase	three_prime_utr	164139	164635	.	+	.	gene_id "SPAC5H10.10"; transcript_id "SPAC5H10.10.1"; gene_name "SPAC5H10.10"; gene_source "PomBase"; gene_biotype "protein_coding"; transcript_name "SPAC5H10.10.1"; transcript_source "PomBase"; transcript_biotype "protein_coding";
I	PomBase	gene	164570	166335	.	+	.	gene_id "SPAC5H10.11"; gene_name "gmh1"; gene_source "PomBase"; gene_biotype "protein_coding";
I	PomBase	transcript	164570	166335	.	+	.	gene_id "SPAC5H10.11"; transcript_id "SPAC5H10.11.1"; gene_name "gmh1"; gene_source "PomBase"; gene_biotype "protein_coding"; transcript_name "gmh1"; transcript_source "PomBase"; transcript_biotype "protein_coding";
I	PomBase	exon	164570	166335	.	+	.	gene_id "SPAC5H10.11"; transcript_id "SPAC5H10.11.1"; exon_number "1"; gene_name "gmh1"; gene_source "PomBase"; gene_biotype "protein_coding"; transcript_name "gmh1"; transcript_source "PomBase"; transcript_biotype "protein_coding"; exon_id "SPAC5H10.11.1:exon:1";
I	PomBase	CDS	164728	165714	.	+	0	gene_id "SPAC5H10.11"; transcript_id "SPAC5H10.11.1"; exon_number "1"; gene_name "gmh1"; gene_source "PomBase"; gene_biotype "protein_coding"; transcript_name "gmh1"; transcript_source "PomBase"; transcript_biotype "protein_coding"; protein_id "SPAC5H10.11.1:pep";
I	PomBase	start_codon	164728	164730	.	+	0	gene_id "SPAC5H10.11"; transcript_id "SPAC5H10.11.1"; exon_number "1"; gene_name "gmh1"; gene_source "PomBase"; gene_biotype "protein_coding"; transcript_name "gmh1"; transcript_source "PomBase"; transcript_biotype "protein_coding";
I	PomBase	stop_codon	165715	165717	.	+	0	gene_id "SPAC5H10.11"; transcript_id "SPAC5H10.11.1"; exon_number "1"; gene_name "gmh1"; gene_source "PomBase"; gene_biotype "protein_coding"; transcript_name "gmh1"; transcript_source "PomBase"; transcript_biotype "protein_coding";
I	PomBase	five_prime_utr	164570	164727	.	+	.	gene_id "SPAC5H10.11"; transcript_id "SPAC5H10.11.1"; gene_name "gmh1"; gene_source "PomBase"; gene_biotype "protein_coding"; transcript_name "gmh1"; transcript_source "PomBase"; transcript_biotype "protein_coding";
I	PomBase	three_prime_utr	165718	166335	.	+	.	gene_id "SPAC5H10.11"; transcript_id "SPAC5H10.11.1"; gene_name "gmh1"; gene_source "PomBase"; gene_biotype "protein_coding"; transcript_name "gmh1"; transcript_source "PomBase"; transcript_biotype "protein_coding";
I	PomBase	gene	165814	167826	.	-	.	gene_id "SPAC5H10.12c"; gene_name "SPAC5H10.12c"; gene_source "PomBase"; gene_biotype "protein_coding";
I	PomBase	transcript	165814	167826	.	-	.	gene_id "SPAC5H10.12c"; transcript_id "SPAC5H10.12c.1"; gene_name "SPAC5H10.12c"; gene_source "PomBase"; gene_biotype "protein_coding"; transcript_name "SPAC5H10.12c.1"; transcript_source "PomBase"; transcript_biotype "protein_coding";
I	PomBase	exon	165814	167826	.	-	.	gene_id "SPAC5H10.12c"; transcript_id "SPAC5H10.12c.1"; exon_number "1"; gene_name "SPAC5H10.12c"; gene_source "PomBase"; gene_biotype "protein_coding"; transcript_name "SPAC5H10.12c.1"; transcript_source "PomBase"; transcript_biotype "protein_coding"; exon_id "SPAC5H10.12c.1:exon:1";
I	PomBase	CDS	166423	167535	.	-	0	gene_id "SPAC5H10.12c"; transcript_id "SPAC5H10.12c.1"; exon_number "1"; gene_name "SPAC5H10.12c"; gene_source "PomBase"; gene_biotype "protein_coding"; transcript_name "SPAC5H10.12c.1"; transcript_source "PomBase"; transcript_biotype "protein_coding"; protein_id "SPAC5H10.12c.1:pep";
I	PomBase	start_codon	167533	167535	.	-	0	gene_id "SPAC5H10.12c"; transcript_id "SPAC5H10.12c.1"; exon_number "1"; gene_name "SPAC5H10.12c"; gene_source "PomBase"; gene_biotype "protein_coding"; transcript_name "SPAC5H10.12c.1"; transcript_source "PomBase"; transcript_biotype "protein_coding";
I	PomBase	stop_codon	166420	166422	.	-	0	gene_id "SPAC5H10.12c"; transcript_id "SPAC5H10.12c.1"; exon_number "1"; gene_name "SPAC5H10.12c"; gene_source "PomBase"; gene_biotype "protein_coding"; transcript_name "SPAC5H10.12c.1"; transcript_source "PomBase"; transcript_biotype "protein_coding";
I	PomBase	five_prime_utr	167536	167826	.	-	.	gene_id "SPAC5H10.12c"; transcript_id "SPAC5H10.12c.1"; gene_name "SPAC5H10.12c"; gene_source "PomBase"; gene_biotype "protein_coding"; transcript_name "SPAC5H10.12c.1"; transcript_source "PomBase"; transcript_biotype "protein_coding";
I	PomBase	three_prime_utr	165814	166419	.	-	.	gene_id "SPAC5H10.12c"; transcript_id "SPAC5H10.12c.1"; gene_name "SPAC5H10.12c"; gene_source "PomBase"; gene_biotype "protein_coding"; transcript_name "SPAC5H10.12c.1"; transcript_source "PomBase"; transcript_biotype "protein_coding";
I	PomBase	gene	166583	167280	.	+	.	gene_id "SPNCRNA.616"; gene_name "SPAC5H10.12c-antisense-1"; gene_source "PomBase"; gene_biotype "ncRNA";
I	PomBase	transcript	166583	167280	.	+	.	gene_id "SPNCRNA.616"; transcript_id "SPNCRNA.616.1"; gene_name "SPAC5H10.12c-antisense-1"; gene_source "PomBase"; gene_biotype "ncRNA"; transcript_name "SPAC5H10.12c-antisense-1"; transcript_source "PomBase"; transcript_biotype "ncRNA";
I	PomBase	exon	166583	167280	.	+	.	gene_id "SPNCRNA.616"; transcript_id "SPNCRNA.616.1"; exon_number "1"; gene_name "SPAC5H10.12c-antisense-1"; gene_source "PomBase"; gene_biotype "ncRNA"; transcript_name "SPAC5H10.12c-antisense-1"; transcript_source "PomBase"; transcript_biotype "ncRNA"; exon_id "SPNCRNA.616.1:exon:1";
I	PomBase	gene	167766	170137	.	-	.	gene_id "SPAC5H10.13c"; gene_name "gmh2"; gene_source "PomBase"; gene_biotype "protein_coding";
I	PomBase	transcript	167766	170137	.	-	.	gene_id "SPAC5H10.13c"; transcript_id "SPAC5H10.13c.1"; gene_name "gmh2"; gene_source "PomBase"; gene_biotype "protein_coding"; transcript_name "gmh2"; transcript_source "PomBase"; transcript_biotype "protein_coding";
I	PomBase	exon	167766	170137	.	-	.	gene_id "SPAC5H10.13c"; transcript_id "SPAC5H10.13c.1"; exon_number "1"; gene_name "gmh2"; gene_source "PomBase"; gene_biotype "protein_coding"; transcript_name "gmh2"; transcript_source "PomBase"; transcript_biotype "protein_coding"; exon_id "SPAC5H10.13c.1:exon:1";
I	PomBase	CDS	168813	169850	.	-	0	gene_id "SPAC5H10.13c"; transcript_id "SPAC5H10.13c.1"; exon_number "1"; gene_name "gmh2"; gene_source "PomBase"; gene_biotype "protein_coding"; transcript_name "gmh2"; transcript_source "PomBase"; transcript_biotype "protein_coding"; protein_id "SPAC5H10.13c.1:pep";
I	PomBase	start_codon	169848	169850	.	-	0	gene_id "SPAC5H10.13c"; transcript_id "SPAC5H10.13c.1"; exon_number "1"; gene_name "gmh2"; gene_source "PomBase"; gene_biotype "protein_coding"; transcript_name "gmh2"; transcript_source "PomBase"; transcript_biotype "protein_coding";
I	PomBase	stop_codon	168810	168812	.	-	0	gene_id "SPAC5H10.13c"; transcript_id "SPAC5H10.13c.1"; exon_number "1"; gene_name "gmh2"; gene_source "PomBase"; gene_biotype "protein_coding"; transcript_name "gmh2"; transcript_source "PomBase"; transcript_biotype "protein_coding";
I	PomBase	five_prime_utr	169851	170137	.	-	.	gene_id "SPAC5H10.13c"; transcript_id "SPAC5H10.13c.1"; gene_name "gmh2"; gene_source "PomBase"; gene_biotype "protein_coding"; transcript_name "gmh2"; transcript_source "PomBase"; transcript_biotype "protein_coding";
I	PomBase	three_prime_utr	167766	168809	.	-	.	gene_id "SPAC5H10.13c"; transcript_id "SPAC5H10.13c.1"; gene_name "gmh2"; gene_source "PomBase"; gene_biotype "protein_coding"; transcript_name "gmh2"; transcript_source "PomBase"; transcript_biotype "protein_coding";
I	PomBase	gene	170237	174473	.	+	.	gene_id "SPNCRNA.617"; gene_name "rad8-antisense-1"; gene_source "PomBase"; gene_biotype "ncRNA";
I	PomBase	transcript	170237	174473	.	+	.	gene_id "SPNCRNA.617"; transcript_id "SPNCRNA.617.1"; gene_name "rad8-antisense-1"; gene_source "PomBase"; gene_biotype "ncRNA"; transcript_name "rad8-antisense-1"; transcript_source "PomBase"; transcript_biotype "ncRNA";
I	PomBase	exon	170237	174473	.	+	.	gene_id "SPNCRNA.617"; transcript_id "SPNCRNA.617.1"; exon_number "1"; gene_name "rad8-antisense-1"; gene_source "PomBase"; gene_biotype "ncRNA"; transcript_name "rad8-antisense-1"; transcript_source "PomBase"; transcript_biotype "ncRNA"; exon_id "SPNCRNA.617.1:exon:1";
I	PomBase	gene	170489	174701	.	-	.	gene_id "SPAC13G6.01c"; gene_name "rad8"; gene_source "PomBase"; gene_biotype "protein_coding";
I	PomBase	transcript	170489	174701	.	-	.	gene_id "SPAC13G6.01c"; transcript_id "SPAC13G6.01c.1"; gene_name "rad8"; gene_source "PomBase"; gene_biotype "protein_coding"; transcript_name "rad8"; transcript_source "PomBase"; transcript_biotype "protein_coding";
I	PomBase	exon	170489	174701	.	-	.	gene_id "SPAC13G6.01c"; transcript_id "SPAC13G6.01c.1"; exon_number "1"; gene_name "rad8"; gene_source "PomBase"; gene_biotype "protein_coding"; transcript_name "rad8"; transcript_source "PomBase"; transcript_biotype "protein_coding"; exon_id "SPAC13G6.01c.1:exon:1";
I	PomBase	CDS	170975	174373	.	-	0	gene_id "SPAC13G6.01c"; transcript_id "SPAC13G6.01c.1"; exon_number "1"; gene_name "rad8"; gene_source "PomBase"; gene_biotype "protein_coding"; transcript_name "rad8"; transcript_source "PomBase"; transcript_biotype "protein_coding"; protein_id "SPAC13G6.01c.1:pep";
I	PomBase	start_codon	174371	174373	.	-	0	gene_id "SPAC13G6.01c"; transcript_id "SPAC13G6.01c.1"; exon_number "1"; gene_name "rad8"; gene_source "PomBase"; gene_biotype "protein_coding"; transcript_name "rad8"; transcript_source "PomBase"; transcript_biotype "protein_coding";
I	PomBase	stop_codon	170972	170974	.	-	0	gene_id "SPAC13G6.01c"; transcript_id "SPAC13G6.01c.1"; exon_number "1"; gene_name "rad8"; gene_source "PomBase"; gene_biotype "protein_coding"; transcript_name "rad8"; transcript_source "PomBase"; transcript_biotype "protein_coding";
I	PomBase	five_prime_utr	174374	174701	.	-	.	gene_id "SPAC13G6.01c"; transcript_id "SPAC13G6.01c.1"; gene_name "rad8"; gene_source "PomBase"; gene_biotype "protein_coding"; transcript_name "rad8"; transcript_source "PomBase"; transcript_biotype "protein_coding";
I	PomBase	three_prime_utr	170489	170971	.	-	.	gene_id "SPAC13G6.01c"; transcript_id "SPAC13G6.01c.1"; gene_name "rad8"; gene_source "PomBase"; gene_biotype "protein_coding"; transcript_name "rad8"; transcript_source "PomBase"; transcript_biotype "protein_coding";
I	PomBase	gene	170709	170856	.	+	.	gene_id "SPSNORNA.49"; gene_name "snR97"; gene_source "PomBase"; gene_biotype "snoRNA";
I	PomBase	transcript	170709	170856	.	+	.	gene_id "SPSNORNA.49"; transcript_id "SPSNORNA.49.1"; gene_name "snR97"; gene_source "PomBase"; gene_biotype "snoRNA"; transcript_name "snR97"; transcript_source "PomBase"; transcript_biotype "snoRNA";
I	PomBase	exon	170709	170856	.	+	.	gene_id "SPSNORNA.49"; transcript_id "SPSNORNA.49.1"; exon_number "1"; gene_name "snR97"; gene_source "PomBase"; gene_biotype "snoRNA"; transcript_name "snR97"; transcript_source "PomBase"; transcript_biotype "snoRNA"; exon_id "SPSNORNA.49.1:exon:1";
I	PomBase	gene	174865	176655	.	-	.	gene_id "SPAC13G6.02c"; gene_name "rps101"; gene_source "PomBase"; gene_biotype "protein_coding";
I	PomBase	transcript	174865	176655	.	-	.	gene_id "SPAC13G6.02c"; transcript_id "SPAC13G6.02c.1"; gene_name "rps101"; gene_source "PomBase"; gene_biotype "protein_coding"; transcript_name "rps101"; transcript_source "PomBase"; transcript_biotype "protein_coding";
I	PomBase	exon	174865	176655	.	-	.	gene_id "SPAC13G6.02c"; transcript_id "SPAC13G6.02c.1"; exon_number "1"; gene_name "rps101"; gene_source "PomBase"; gene_biotype "protein_coding"; transcript_name "rps101"; transcript_source "PomBase"; transcript_biotype "protein_coding"; exon_id "SPAC13G6.02c.1:exon:1";
I	PomBase	CDS	175013	175771	.	-	0	gene_id "SPAC13G6.02c"; transcript_id "SPAC13G6.02c.1"; exon_number "1"; gene_name "rps101"; gene_source "PomBase"; gene_biotype "protein_coding"; transcript_name "rps101"; transcript_source "PomBase"; transcript_biotype "protein_coding"; protein_id "SPAC13G6.02c.1:pep";
I	PomBase	start_codon	175769	175771	.	-	0	gene_id "SPAC13G6.02c"; transcript_id "SPAC13G6.02c.1"; exon_number "1"; gene_name "rps101"; gene_source "PomBase"; gene_biotype "protein_coding"; transcript_name "rps101"; transcript_source "PomBase"; transcript_biotype "protein_coding";
I	PomBase	five_prime_utr	175772	176655	.	-	.	gene_id "SPAC13G6.02c"; transcript_id "SPAC13G6.02c.1"; gene_name "rps101"; gene_source "PomBase"; gene_biotype "protein_coding"; transcript_name "rps101"; transcript_source "PomBase"; transcript_biotype "protein_coding";
I	PomBase	three_prime_utr	174865	175012	.	-	.	gene_id "SPAC13G6.02c"; transcript_id "SPAC13G6.02c.1"; gene_name "rps101"; gene_source "PomBase"; gene_biotype "protein_coding"; transcript_name "rps101"; transcript_source "PomBase"; transcript_biotype "protein_coding";
I	PomBase	gene	175890	180028	.	+	.	gene_id "SPAC13G6.03"; gene_name "gpi7"; gene_source "PomBase"; gene_biotype "protein_coding";
I	PomBase	transcript	175890	180028	.	+	.	gene_id "SPAC13G6.03"; transcript_id "SPAC13G6.03.1"; gene_name "gpi7"; gene_source "PomBase"; gene_biotype "protein_coding"; transcript_name "gpi7"; transcript_source "PomBase"; transcript_biotype "protein_coding";
I	PomBase	exon	175890	180028	.	+	.	gene_id "SPAC13G6.03"; transcript_id "SPAC13G6.03.1"; exon_number "1"; gene_name "gpi7"; gene_source "PomBase"; gene_biotype "protein_coding"; transcript_name "gpi7"; transcript_source "PomBase"; transcript_biotype "protein_coding"; exon_id "SPAC13G6.03.1:exon:1";
I	PomBase	CDS	177292	179568	.	+	0	gene_id "SPAC13G6.03"; transcript_id "SPAC13G6.03.1"; exon_number "1"; gene_name "gpi7"; gene_source "PomBase"; gene_biotype "protein_coding"; transcript_name "gpi7"; transcript_source "PomBase"; transcript_biotype "protein_coding"; protein_id "SPAC13G6.03.1:pep";
I	PomBase	start_codon	177292	177294	.	+	0	gene_id "SPAC13G6.03"; transcript_id "SPAC13G6.03.1"; exon_number "1"; gene_name "gpi7"; gene_source "PomBase"; gene_biotype "protein_coding"; transcript_name "gpi7"; transcript_source "PomBase"; transcript_biotype "protein_coding";
I	PomBase	five_prime_utr	175890	177291	.	+	.	gene_id "SPAC13G6.03"; transcript_id "SPAC13G6.03.1"; gene_name "gpi7"; gene_source "PomBase"; gene_biotype "protein_coding"; transcript_name "gpi7"; transcript_source "PomBase"; transcript_biotype "protein_coding";
I	PomBase	three_prime_utr	179569	180028	.	+	.	gene_id "SPAC13G6.03"; transcript_id "SPAC13G6.03.1"; gene_name "gpi7"; gene_source "PomBase"; gene_biotype "protein_coding"; transcript_name "gpi7"; transcript_source "PomBase"; transcript_biotype "protein_coding";
I	PomBase	gene	175923	176736	.	+	.	gene_id "SPNCRNA.141"; gene_name "SPNCRNA.141"; gene_source "PomBase"; gene_biotype "ncRNA";
I	PomBase	transcript	175923	176736	.	+	.	gene_id "SPNCRNA.141"; transcript_id "SPNCRNA.141.1"; gene_name "SPNCRNA.141"; gene_source "PomBase"; gene_biotype "ncRNA"; transcript_name "SPNCRNA.141.1"; transcript_source "PomBase"; transcript_biotype "ncRNA";
I	PomBase	exon	175923	176736	.	+	.	gene_id "SPNCRNA.141"; transcript_id "SPNCRNA.141.1"; exon_number "1"; gene_name "SPNCRNA.141"; gene_source "PomBase"; gene_biotype "ncRNA"; transcript_name "SPNCRNA.141.1"; transcript_source "PomBase"; transcript_biotype "ncRNA"; exon_id "SPNCRNA.141.1:exon:1";
I	PomBase	gene	176878	177943	.	-	.	gene_id "SPNCRNA.618"; gene_name "gpi7-antisense-1"; gene_source "PomBase"; gene_biotype "ncRNA";
I	PomBase	transcript	176878	177943	.	-	.	gene_id "SPNCRNA.618"; transcript_id "SPNCRNA.618.1"; gene_name "gpi7-antisense-1"; gene_source "PomBase"; gene_biotype "ncRNA"; transcript_name "gpi7-antisense-1"; transcript_source "PomBase"; transcript_biotype "ncRNA";
I	PomBase	exon	176878	177943	.	-	.	gene_id "SPNCRNA.618"; transcript_id "SPNCRNA.618.1"; exon_number "1"; gene_name "gpi7-antisense-1"; gene_source "PomBase"; gene_biotype "ncRNA"; transcript_name "gpi7-antisense-1"; transcript_source "PomBase"; transcript_biotype "ncRNA"; exon_id "SPNCRNA.618.1:exon:1";
I	PomBase	gene	180272	181069	.	+	.	gene_id "SPAC13G6.04"; gene_name "tim8"; gene_source "PomBase"; gene_biotype "protein_coding";
I	PomBase	transcript	180272	181069	.	+	.	gene_id "SPAC13G6.04"; transcript_id "SPAC13G6.04.1"; gene_name "tim8"; gene_source "PomBase"; gene_biotype "protein_coding"; transcript_name "tim8"; transcript_source "PomBase"; transcript_biotype "protein_coding";
I	PomBase	exon	180272	180528	.	+	.	gene_id "SPAC13G6.04"; transcript_id "SPAC13G6.04.1"; exon_number "1"; gene_name "tim8"; gene_source "PomBase"; gene_biotype "protein_coding"; transcript_name "tim8"; transcript_source "PomBase"; transcript_biotype "protein_coding"; exon_id "SPAC13G6.04.1:exon:1";
I	PomBase	CDS	180423	180528	.	+	0	gene_id "SPAC13G6.04"; transcript_id "SPAC13G6.04.1"; exon_number "1"; gene_name "tim8"; gene_source "PomBase"; gene_biotype "protein_coding"; transcript_name "tim8"; transcript_source "PomBase"; transcript_biotype "protein_coding"; protein_id "SPAC13G6.04.1:pep";
I	PomBase	start_codon	180423	180425	.	+	0	gene_id "SPAC13G6.04"; transcript_id "SPAC13G6.04.1"; exon_number "1"; gene_name "tim8"; gene_source "PomBase"; gene_biotype "protein_coding"; transcript_name "tim8"; transcript_source "PomBase"; transcript_biotype "protein_coding";
I	PomBase	exon	180586	180721	.	+	.	gene_id "SPAC13G6.04"; transcript_id "SPAC13G6.04.1"; exon_number "2"; gene_name "tim8"; gene_source "PomBase"; gene_biotype "protein_coding"; transcript_name "tim8"; transcript_source "PomBase"; transcript_biotype "protein_coding"; exon_id "SPAC13G6.04.1:exon:2";
I	PomBase	CDS	180586	180721	.	+	2	gene_id "SPAC13G6.04"; transcript_id "SPAC13G6.04.1"; exon_number "2"; gene_name "tim8"; gene_source "PomBase"; gene_biotype "protein_coding"; transcript_name "tim8"; transcript_source "PomBase"; transcript_biotype "protein_coding"; protein_id "SPAC13G6.04.1:pep";
I	PomBase	exon	180890	181069	.	+	.	gene_id "SPAC13G6.04"; transcript_id "SPAC13G6.04.1"; exon_number "3"; gene_name "tim8"; gene_source "PomBase"; gene_biotype "protein_coding"; transcript_name "tim8"; transcript_source "PomBase"; transcript_biotype "protein_coding"; exon_id "SPAC13G6.04.1:exon:3";
I	PomBase	CDS	180890	180911	.	+	1	gene_id "SPAC13G6.04"; transcript_id "SPAC13G6.04.1"; exon_number "3"; gene_name "tim8"; gene_source "PomBase"; gene_biotype "protein_coding"; transcript_name "tim8"; transcript_source "PomBase"; transcript_biotype "protein_coding"; protein_id "SPAC13G6.04.1:pep";
I	PomBase	five_prime_utr	180272	180422	.	+	.	gene_id "SPAC13G6.04"; transcript_id "SPAC13G6.04.1"; gene_name "tim8"; gene_source "PomBase"; gene_biotype "protein_coding"; transcript_name "tim8"; transcript_source "PomBase"; transcript_biotype "protein_coding";
I	PomBase	three_prime_utr	180912	181069	.	+	.	gene_id "SPAC13G6.04"; transcript_id "SPAC13G6.04.1"; gene_name "tim8"; gene_source "PomBase"; gene_biotype "protein_coding"; transcript_name "tim8"; transcript_source "PomBase"; transcript_biotype "protein_coding";
I	PomBase	gene	180903	182254	.	-	.	gene_id "SPAC13G6.05c"; gene_name "trs33"; gene_source "PomBase"; gene_biotype "protein_coding";
I	PomBase	transcript	180903	182254	.	-	.	gene_id "SPAC13G6.05c"; transcript_id "SPAC13G6.05c.1"; gene_name "trs33"; gene_source "PomBase"; gene_biotype "protein_coding"; transcript_name "trs33"; transcript_source "PomBase"; transcript_biotype "protein_coding";
I	PomBase	exon	182001	182254	.	-	.	gene_id "SPAC13G6.05c"; transcript_id "SPAC13G6.05c.1"; exon_number "1"; gene_name "trs33"; gene_source "PomBase"; gene_biotype "protein_coding"; transcript_name "trs33"; transcript_source "PomBase"; transcript_biotype "protein_coding"; exon_id "SPAC13G6.05c.1:exon:1";
I	PomBase	CDS	182001	182194	.	-	0	gene_id "SPAC13G6.05c"; transcript_id "SPAC13G6.05c.1"; exon_number "1"; gene_name "trs33"; gene_source "PomBase"; gene_biotype "protein_coding"; transcript_name "trs33"; transcript_source "PomBase"; transcript_biotype "protein_coding"; protein_id "SPAC13G6.05c.1:pep";
I	PomBase	start_codon	182192	182194	.	-	0	gene_id "SPAC13G6.05c"; transcript_id "SPAC13G6.05c.1"; exon_number "1"; gene_name "trs33"; gene_source "PomBase"; gene_biotype "protein_coding"; transcript_name "trs33"; transcript_source "PomBase"; transcript_biotype "protein_coding";
I	PomBase	exon	181632	181749	.	-	.	gene_id "SPAC13G6.05c"; transcript_id "SPAC13G6.05c.1"; exon_number "2"; gene_name "trs33"; gene_source "PomBase"; gene_biotype "protein_coding"; transcript_name "trs33"; transcript_source "PomBase"; transcript_biotype "protein_coding"; exon_id "SPAC13G6.05c.1:exon:2";
I	PomBase	CDS	181632	181749	.	-	1	gene_id "SPAC13G6.05c"; transcript_id "SPAC13G6.05c.1"; exon_number "2"; gene_name "trs33"; gene_source "PomBase"; gene_biotype "protein_coding"; transcript_name "trs33"; transcript_source "PomBase"; transcript_biotype "protein_coding"; protein_id "SPAC13G6.05c.1:pep";
I	PomBase	exon	181485	181574	.	-	.	gene_id "SPAC13G6.05c"; transcript_id "SPAC13G6.05c.1"; exon_number "3"; gene_name "trs33"; gene_source "PomBase"; gene_biotype "protein_coding"; transcript_name "trs33"; transcript_source "PomBase"; transcript_biotype "protein_coding"; exon_id "SPAC13G6.05c.1:exon:3";
I	PomBase	CDS	181485	181574	.	-	0	gene_id "SPAC13G6.05c"; transcript_id "SPAC13G6.05c.1"; exon_number "3"; gene_name "trs33"; gene_source "PomBase"; gene_biotype "protein_coding"; transcript_name "trs33"; transcript_source "PomBase"; transcript_biotype "protein_coding"; protein_id "SPAC13G6.05c.1:pep";
I	PomBase	exon	180903	181436	.	-	.	gene_id "SPAC13G6.05c"; transcript_id "SPAC13G6.05c.1"; exon_number "4"; gene_name "trs33"; gene_source "PomBase"; gene_biotype "protein_coding"; transcript_name "trs33"; transcript_source "PomBase"; transcript_biotype "protein_coding"; exon_id "SPAC13G6.05c.1:exon:4";
I	PomBase	CDS	181080	181436	.	-	0	gene_id "SPAC13G6.05c"; transcript_id "SPAC13G6.05c.1"; exon_number "4"; gene_name "trs33"; gene_source "PomBase"; gene_biotype "protein_coding"; transcript_name "trs33"; transcript_source "PomBase"; transcript_biotype "protein_coding"; protein_id "SPAC13G6.05c.1:pep";
I	PomBase	stop_codon	181077	181079	.	-	0	gene_id "SPAC13G6.05c"; transcript_id "SPAC13G6.05c.1"; exon_number "4"; gene_name "trs33"; gene_source "PomBase"; gene_biotype "protein_coding"; transcript_name "trs33"; transcript_source "PomBase"; transcript_biotype "protein_coding";
I	PomBase	five_prime_utr	182195	182254	.	-	.	gene_id "SPAC13G6.05c"; transcript_id "SPAC13G6.05c.1"; gene_name "trs33"; gene_source "PomBase"; gene_biotype "protein_coding"; transcript_name "trs33"; transcript_source "PomBase"; transcript_biotype "protein_coding";
I	PomBase	three_prime_utr	180903	181076	.	-	.	gene_id "SPAC13G6.05c"; transcript_id "SPAC13G6.05c.1"; gene_name "trs33"; gene_source "PomBase"; gene_biotype "protein_coding"; transcript_name "trs33"; transcript_source "PomBase"; transcript_biotype "protein_coding";
I	PomBase	gene	182337	186358	.	-	.	gene_id "SPAC13G6.06c"; gene_name "gcv2"; gene_source "PomBase"; gene_biotype "protein_coding";
I	PomBase	transcript	182337	186358	.	-	.	gene_id "SPAC13G6.06c"; transcript_id "SPAC13G6.06c.1"; gene_name "gcv2"; gene_source "PomBase"; gene_biotype "protein_coding"; transcript_name "gcv2"; transcript_source "PomBase"; transcript_biotype "protein_coding";
I	PomBase	exon	182337	186358	.	-	.	gene_id "SPAC13G6.06c"; transcript_id "SPAC13G6.06c.1"; exon_number "1"; gene_name "gcv2"; gene_source "PomBase"; gene_biotype "protein_coding"; transcript_name "gcv2"; transcript_source "PomBase"; transcript_biotype "protein_coding"; exon_id "SPAC13G6.06c.1:exon:1";
I	PomBase	CDS	182979	186071	.	-	0	gene_id "SPAC13G6.06c"; transcript_id "SPAC13G6.06c.1"; exon_number "1"; gene_name "gcv2"; gene_source "PomBase"; gene_biotype "protein_coding"; transcript_name "gcv2"; transcript_source "PomBase"; transcript_biotype "protein_coding"; protein_id "SPAC13G6.06c.1:pep";
I	PomBase	start_codon	186069	186071	.	-	0	gene_id "SPAC13G6.06c"; transcript_id "SPAC13G6.06c.1"; exon_number "1"; gene_name "gcv2"; gene_source "PomBase"; gene_biotype "protein_coding"; transcript_name "gcv2"; transcript_source "PomBase"; transcript_biotype "protein_coding";
I	PomBase	stop_codon	182976	182978	.	-	0	gene_id "SPAC13G6.06c"; transcript_id "SPAC13G6.06c.1"; exon_number "1"; gene_name "gcv2"; gene_source "PomBase"; gene_biotype "protein_coding"; transcript_name "gcv2"; transcript_source "PomBase"; transcript_biotype "protein_coding";
I	PomBase	five_prime_utr	186072	186358	.	-	.	gene_id "SPAC13G6.06c"; transcript_id "SPAC13G6.06c.1"; gene_name "gcv2"; gene_source "PomBase"; gene_biotype "protein_coding"; transcript_name "gcv2"; transcript_source "PomBase"; transcript_biotype "protein_coding";
I	PomBase	three_prime_utr	182337	182975	.	-	.	gene_id "SPAC13G6.06c"; transcript_id "SPAC13G6.06c.1"; gene_name "gcv2"; gene_source "PomBase"; gene_biotype "protein_coding"; transcript_name "gcv2"; transcript_source "PomBase"; transcript_biotype "protein_coding";
I	PomBase	gene	186314	187683	.	-	.	gene_id "SPAC13G6.07c"; gene_name "rps601"; gene_source "PomBase"; gene_biotype "protein_coding";
I	PomBase	transcript	186314	187683	.	-	.	gene_id "SPAC13G6.07c"; transcript_id "SPAC13G6.07c.1"; gene_name "rps601"; gene_source "PomBase"; gene_biotype "protein_coding"; transcript_name "rps601"; transcript_source "PomBase"; transcript_biotype "protein_coding";
I	PomBase	exon	186314	187683	.	-	.	gene_id "SPAC13G6.07c"; transcript_id "SPAC13G6.07c.1"; exon_number "1"; gene_name "rps601"; gene_source "PomBase"; gene_biotype "protein_coding"; transcript_name "rps601"; transcript_source "PomBase"; transcript_biotype "protein_coding"; exon_id "SPAC13G6.07c.1:exon:1";
I	PomBase	CDS	186844	187563	.	-	0	gene_id "SPAC13G6.07c"; transcript_id "SPAC13G6.07c.1"; exon_number "1"; gene_name "rps601"; gene_source "PomBase"; gene_biotype "protein_coding"; transcript_name "rps601"; transcript_source "PomBase"; transcript_biotype "protein_coding"; protein_id "SPAC13G6.07c.1:pep";
I	PomBase	start_codon	187561	187563	.	-	0	gene_id "SPAC13G6.07c"; transcript_id "SPAC13G6.07c.1"; exon_number "1"; gene_name "rps601"; gene_source "PomBase"; gene_biotype "protein_coding"; transcript_name "rps601"; transcript_source "PomBase"; transcript_biotype "protein_coding";
I	PomBase	five_prime_utr	187564	187683	.	-	.	gene_id "SPAC13G6.07c"; transcript_id "SPAC13G6.07c.1"; gene_name "rps601"; gene_source "PomBase"; gene_biotype "protein_coding"; transcript_name "rps601"; transcript_source "PomBase"; transcript_biotype "protein_coding";
I	PomBase	three_prime_utr	186314	186843	.	-	.	gene_id "SPAC13G6.07c"; transcript_id "SPAC13G6.07c.1"; gene_name "rps601"; gene_source "PomBase"; gene_biotype "protein_coding"; transcript_name "rps601"; transcript_source "PomBase"; transcript_biotype "protein_coding";
I	PomBase	gene	187701	190031	.	+	.	gene_id "SPAC13G6.08"; gene_name "SPAC13G6.08"; gene_source "PomBase"; gene_biotype "protein_coding";
I	PomBase	transcript	187701	190031	.	+	.	gene_id "SPAC13G6.08"; transcript_id "SPAC13G6.08.1"; gene_name "SPAC13G6.08"; gene_source "PomBase"; gene_biotype "protein_coding"; transcript_name "SPAC13G6.08.1"; transcript_source "PomBase"; transcript_biotype "protein_coding";
I	PomBase	exon	187701	190031	.	+	.	gene_id "SPAC13G6.08"; transcript_id "SPAC13G6.08.1"; exon_number "1"; gene_name "SPAC13G6.08"; gene_source "PomBase"; gene_biotype "protein_coding"; transcript_name "SPAC13G6.08.1"; transcript_source "PomBase"; transcript_biotype "protein_coding"; exon_id "SPAC13G6.08.1:exon:1";
I	PomBase	CDS	188377	189984	.	+	0	gene_id "SPAC13G6.08"; transcript_id "SPAC13G6.08.1"; exon_number "1"; gene_name "SPAC13G6.08"; gene_source "PomBase"; gene_biotype "protein_coding"; transcript_name "SPAC13G6.08.1"; transcript_source "PomBase"; transcript_biotype "protein_coding"; protein_id "SPAC13G6.08.1:pep";
I	PomBase	start_codon	188377	188379	.	+	0	gene_id "SPAC13G6.08"; transcript_id "SPAC13G6.08.1"; exon_number "1"; gene_name "SPAC13G6.08"; gene_source "PomBase"; gene_biotype "protein_coding"; transcript_name "SPAC13G6.08.1"; transcript_source "PomBase"; transcript_biotype "protein_coding";
I	PomBase	five_prime_utr	187701	188376	.	+	.	gene_id "SPAC13G6.08"; transcript_id "SPAC13G6.08.1"; gene_name "SPAC13G6.08"; gene_source "PomBase"; gene_biotype "protein_coding"; transcript_name "SPAC13G6.08.1"; transcript_source "PomBase"; transcript_biotype "protein_coding";
I	PomBase	three_prime_utr	189985	190031	.	+	.	gene_id "SPAC13G6.08"; transcript_id "SPAC13G6.08.1"; gene_name "SPAC13G6.08"; gene_source "PomBase"; gene_biotype "protein_coding"; transcript_name "SPAC13G6.08.1"; transcript_source "PomBase"; transcript_biotype "protein_coding";
I	PomBase	gene	188450	190474	.	-	.	gene_id "SPNCRNA.619"; gene_name "SPNCRNA.619"; gene_source "PomBase"; gene_biotype "ncRNA";
I	PomBase	transcript	188450	190474	.	-	.	gene_id "SPNCRNA.619"; transcript_id "SPNCRNA.619.1"; gene_name "SPNCRNA.619"; gene_source "PomBase"; gene_biotype "ncRNA"; transcript_name "SPNCRNA.619.1"; transcript_source "PomBase"; transcript_biotype "ncRNA";
I	PomBase	exon	188450	190474	.	-	.	gene_id "SPNCRNA.619"; transcript_id "SPNCRNA.619.1"; exon_number "1"; gene_name "SPNCRNA.619"; gene_source "PomBase"; gene_biotype "ncRNA"; transcript_name "SPNCRNA.619.1"; transcript_source "PomBase"; transcript_biotype "ncRNA"; exon_id "SPNCRNA.619.1:exon:1";
I	PomBase	gene	190192	191947	.	+	.	gene_id "SPAC13G6.09"; gene_name "SPAC13G6.09"; gene_source "PomBase"; gene_biotype "protein_coding";
I	PomBase	transcript	190192	191947	.	+	.	gene_id "SPAC13G6.09"; transcript_id "SPAC13G6.09.1"; gene_name "SPAC13G6.09"; gene_source "PomBase"; gene_biotype "protein_coding"; transcript_name "SPAC13G6.09.1"; transcript_source "PomBase"; transcript_biotype "protein_coding";
I	PomBase	exon	190192	190584	.	+	.	gene_id "SPAC13G6.09"; transcript_id "SPAC13G6.09.1"; exon_number "1"; gene_name "SPAC13G6.09"; gene_source "PomBase"; gene_biotype "protein_coding"; transcript_name "SPAC13G6.09.1"; transcript_source "PomBase"; transcript_biotype "protein_coding"; exon_id "SPAC13G6.09.1:exon:1";
I	PomBase	CDS	190322	190584	.	+	0	gene_id "SPAC13G6.09"; transcript_id "SPAC13G6.09.1"; exon_number "1"; gene_name "SPAC13G6.09"; gene_source "PomBase"; gene_biotype "protein_coding"; transcript_name "SPAC13G6.09.1"; transcript_source "PomBase"; transcript_biotype "protein_coding"; protein_id "SPAC13G6.09.1:pep";
I	PomBase	start_codon	190322	190324	.	+	0	gene_id "SPAC13G6.09"; transcript_id "SPAC13G6.09.1"; exon_number "1"; gene_name "SPAC13G6.09"; gene_source "PomBase"; gene_biotype "protein_coding"; transcript_name "SPAC13G6.09.1"; transcript_source "PomBase"; transcript_biotype "protein_coding";
I	PomBase	exon	190730	191947	.	+	.	gene_id "SPAC13G6.09"; transcript_id "SPAC13G6.09.1"; exon_number "2"; gene_name "SPAC13G6.09"; gene_source "PomBase"; gene_biotype "protein_coding"; transcript_name "SPAC13G6.09.1"; transcript_source "PomBase"; transcript_biotype "protein_coding"; exon_id "SPAC13G6.09.1:exon:2";
I	PomBase	CDS	190730	191291	.	+	1	gene_id "SPAC13G6.09"; transcript_id "SPAC13G6.09.1"; exon_number "2"; gene_name "SPAC13G6.09"; gene_source "PomBase"; gene_biotype "protein_coding"; transcript_name "SPAC13G6.09.1"; transcript_source "PomBase"; transcript_biotype "protein_coding"; protein_id "SPAC13G6.09.1:pep";
I	PomBase	five_prime_utr	190192	190321	.	+	.	gene_id "SPAC13G6.09"; transcript_id "SPAC13G6.09.1"; gene_name "SPAC13G6.09"; gene_source "PomBase"; gene_biotype "protein_coding"; transcript_name "SPAC13G6.09.1"; transcript_source "PomBase"; transcript_biotype "protein_coding";
I	PomBase	three_prime_utr	191292	191947	.	+	.	gene_id "SPAC13G6.09"; transcript_id "SPAC13G6.09.1"; gene_name "SPAC13G6.09"; gene_source "PomBase"; gene_biotype "protein_coding"; transcript_name "SPAC13G6.09.1"; transcript_source "PomBase"; transcript_biotype "protein_coding";
I	PomBase	gene	191928	194053	.	-	.	gene_id "SPAC13G6.10c"; gene_name "asl1"; gene_source "PomBase"; gene_biotype "protein_coding";
I	PomBase	transcript	191928	194053	.	-	.	gene_id "SPAC13G6.10c"; transcript_id "SPAC13G6.10c.1"; gene_name "asl1"; gene_source "PomBase"; gene_biotype "protein_coding"; transcript_name "asl1"; transcript_source "PomBase"; transcript_biotype "protein_coding";
I	PomBase	exon	191928	194053	.	-	.	gene_id "SPAC13G6.10c"; transcript_id "SPAC13G6.10c.1"; exon_number "1"; gene_name "asl1"; gene_source "PomBase"; gene_biotype "protein_coding"; transcript_name "asl1"; transcript_source "PomBase"; transcript_biotype "protein_coding"; exon_id "SPAC13G6.10c.1:exon:1";
I	PomBase	CDS	192296	193888	.	-	0	gene_id "SPAC13G6.10c"; transcript_id "SPAC13G6.10c.1"; exon_number "1"; gene_name "asl1"; gene_source "PomBase"; gene_biotype "protein_coding"; transcript_name "asl1"; transcript_source "PomBase"; transcript_biotype "protein_coding"; protein_id "SPAC13G6.10c.1:pep";
I	PomBase	start_codon	193886	193888	.	-	0	gene_id "SPAC13G6.10c"; transcript_id "SPAC13G6.10c.1"; exon_number "1"; gene_name "asl1"; gene_source "PomBase"; gene_biotype "protein_coding"; transcript_name "asl1"; transcript_source "PomBase"; transcript_biotype "protein_coding";
I	PomBase	five_prime_utr	193889	194053	.	-	.	gene_id "SPAC13G6.10c"; transcript_id "SPAC13G6.10c.1"; gene_name "asl1"; gene_source "PomBase"; gene_biotype "protein_coding"; transcript_name "asl1"; transcript_source "PomBase"; transcript_biotype "protein_coding";
I	PomBase	three_prime_utr	191928	192295	.	-	.	gene_id "SPAC13G6.10c"; transcript_id "SPAC13G6.10c.1"; gene_name "asl1"; gene_source "PomBase"; gene_biotype "protein_coding"; transcript_name "asl1"; transcript_source "PomBase"; transcript_biotype "protein_coding";
I	PomBase	gene	194099	195626	.	-	.	gene_id "SPAC13G6.11c"; gene_name "erg12"; gene_source "PomBase"; gene_biotype "protein_coding";
I	PomBase	transcript	194099	195626	.	-	.	gene_id "SPAC13G6.11c"; transcript_id "SPAC13G6.11c.1"; gene_name "erg12"; gene_source "PomBase"; gene_biotype "protein_coding"; transcript_name "erg12"; transcript_source "PomBase"; transcript_biotype "protein_coding";
I	PomBase	exon	195508	195626	.	-	.	gene_id "SPAC13G6.11c"; transcript_id "SPAC13G6.11c.1"; exon_number "1"; gene_name "erg12"; gene_source "PomBase"; gene_biotype "protein_coding"; transcript_name "erg12"; transcript_source "PomBase"; transcript_biotype "protein_coding"; exon_id "SPAC13G6.11c.1:exon:1";
I	PomBase	CDS	195508	195582	.	-	0	gene_id "SPAC13G6.11c"; transcript_id "SPAC13G6.11c.1"; exon_number "1"; gene_name "erg12"; gene_source "PomBase"; gene_biotype "protein_coding"; transcript_name "erg12"; transcript_source "PomBase"; transcript_biotype "protein_coding"; protein_id "SPAC13G6.11c.1:pep";
I	PomBase	start_codon	195580	195582	.	-	0	gene_id "SPAC13G6.11c"; transcript_id "SPAC13G6.11c.1"; exon_number "1"; gene_name "erg12"; gene_source "PomBase"; gene_biotype "protein_coding"; transcript_name "erg12"; transcript_source "PomBase"; transcript_biotype "protein_coding";
I	PomBase	exon	194099	195258	.	-	.	gene_id "SPAC13G6.11c"; transcript_id "SPAC13G6.11c.1"; exon_number "2"; gene_name "erg12"; gene_source "PomBase"; gene_biotype "protein_coding"; transcript_name "erg12"; transcript_source "PomBase"; transcript_biotype "protein_coding"; exon_id "SPAC13G6.11c.1:exon:2";
I	PomBase	CDS	194122	195258	.	-	0	gene_id "SPAC13G6.11c"; transcript_id "SPAC13G6.11c.1"; exon_number "2"; gene_name "erg12"; gene_source "PomBase"; gene_biotype "protein_coding"; transcript_name "erg12"; transcript_source "PomBase"; transcript_biotype "protein_coding"; protein_id "SPAC13G6.11c.1:pep";
I	PomBase	stop_codon	194119	194121	.	-	0	gene_id "SPAC13G6.11c"; transcript_id "SPAC13G6.11c.1"; exon_number "2"; gene_name "erg12"; gene_source "PomBase"; gene_biotype "protein_coding"; transcript_name "erg12"; transcript_source "PomBase"; transcript_biotype "protein_coding";
I	PomBase	five_prime_utr	195583	195626	.	-	.	gene_id "SPAC13G6.11c"; transcript_id "SPAC13G6.11c.1"; gene_name "erg12"; gene_source "PomBase"; gene_biotype "protein_coding"; transcript_name "erg12"; transcript_source "PomBase"; transcript_biotype "protein_coding";
I	PomBase	three_prime_utr	194099	194118	.	-	.	gene_id "SPAC13G6.11c"; transcript_id "SPAC13G6.11c.1"; gene_name "erg12"; gene_source "PomBase"; gene_biotype "protein_coding"; transcript_name "erg12"; transcript_source "PomBase"; transcript_biotype "protein_coding";
I	PomBase	gene	195940	199051	.	-	.	gene_id "SPAC13G6.12c"; gene_name "chs1"; gene_source "PomBase"; gene_biotype "protein_coding";
I	PomBase	transcript	195940	199051	.	-	.	gene_id "SPAC13G6.12c"; transcript_id "SPAC13G6.12c.1"; gene_name "chs1"; gene_source "PomBase"; gene_biotype "protein_coding"; transcript_name "chs1"; transcript_source "PomBase"; transcript_biotype "protein_coding";
I	PomBase	exon	196221	199051	.	-	.	gene_id "SPAC13G6.12c"; transcript_id "SPAC13G6.12c.1"; exon_number "1"; gene_name "chs1"; gene_source "PomBase"; gene_biotype "protein_coding"; transcript_name "chs1"; transcript_source "PomBase"; transcript_biotype "protein_coding"; exon_id "SPAC13G6.12c.1:exon:1";
I	PomBase	CDS	196221	198715	.	-	0	gene_id "SPAC13G6.12c"; transcript_id "SPAC13G6.12c.1"; exon_number "1"; gene_name "chs1"; gene_source "PomBase"; gene_biotype "protein_coding"; transcript_name "chs1"; transcript_source "PomBase"; transcript_biotype "protein_coding"; protein_id "SPAC13G6.12c.1:pep";
I	PomBase	start_codon	198713	198715	.	-	0	gene_id "SPAC13G6.12c"; transcript_id "SPAC13G6.12c.1"; exon_number "1"; gene_name "chs1"; gene_source "PomBase"; gene_biotype "protein_coding"; transcript_name "chs1"; transcript_source "PomBase"; transcript_biotype "protein_coding";
I	PomBase	exon	195940	196174	.	-	.	gene_id "SPAC13G6.12c"; transcript_id "SPAC13G6.12c.1"; exon_number "2"; gene_name "chs1"; gene_source "PomBase"; gene_biotype "protein_coding"; transcript_name "chs1"; transcript_source "PomBase"; transcript_biotype "protein_coding"; exon_id "SPAC13G6.12c.1:exon:2";
I	PomBase	CDS	196090	196174	.	-	1	gene_id "SPAC13G6.12c"; transcript_id "SPAC13G6.12c.1"; exon_number "2"; gene_name "chs1"; gene_source "PomBase"; gene_biotype "protein_coding"; transcript_name "chs1"; transcript_source "PomBase"; transcript_biotype "protein_coding"; protein_id "SPAC13G6.12c.1:pep";
I	PomBase	five_prime_utr	198716	199051	.	-	.	gene_id "SPAC13G6.12c"; transcript_id "SPAC13G6.12c.1"; gene_name "chs1"; gene_source "PomBase"; gene_biotype "protein_coding"; transcript_name "chs1"; transcript_source "PomBase"; transcript_biotype "protein_coding";
I	PomBase	three_prime_utr	195940	196089	.	-	.	gene_id "SPAC13G6.12c"; transcript_id "SPAC13G6.12c.1"; gene_name "chs1"; gene_source "PomBase"; gene_biotype "protein_coding"; transcript_name "chs1"; transcript_source "PomBase"; transcript_biotype "protein_coding";
I	PomBase	gene	198884	199231	.	+	.	gene_id "SPAC13G6.13"; gene_name "SPAC13G6.13"; gene_source "PomBase"; gene_biotype "protein_coding";
I	PomBase	transcript	198884	199231	.	+	.	gene_id "SPAC13G6.13"; transcript_id "SPAC13G6.13.1"; gene_name "SPAC13G6.13"; gene_source "PomBase"; gene_biotype "protein_coding"; transcript_name "SPAC13G6.13.1"; transcript_source "PomBase"; transcript_biotype "protein_coding";
I	PomBase	exon	198884	199231	.	+	.	gene_id "SPAC13G6.13"; transcript_id "SPAC13G6.13.1"; exon_number "1"; gene_name "SPAC13G6.13"; gene_source "PomBase"; gene_biotype "protein_coding"; transcript_name "SPAC13G6.13.1"; transcript_source "PomBase"; transcript_biotype "protein_coding"; exon_id "SPAC13G6.13.1:exon:1";
I	PomBase	CDS	198884	199228	.	+	0	gene_id "SPAC13G6.13"; transcript_id "SPAC13G6.13.1"; exon_number "1"; gene_name "SPAC13G6.13"; gene_source "PomBase"; gene_biotype "protein_coding"; transcript_name "SPAC13G6.13.1"; transcript_source "PomBase"; transcript_biotype "protein_coding"; protein_id "SPAC13G6.13.1:pep";
I	PomBase	start_codon	198884	198886	.	+	0	gene_id "SPAC13G6.13"; transcript_id "SPAC13G6.13.1"; exon_number "1"; gene_name "SPAC13G6.13"; gene_source "PomBase"; gene_biotype "protein_coding"; transcript_name "SPAC13G6.13.1"; transcript_source "PomBase"; transcript_biotype "protein_coding";
I	PomBase	stop_codon	199229	199231	.	+	0	gene_id "SPAC13G6.13"; transcript_id "SPAC13G6.13.1"; exon_number "1"; gene_name "SPAC13G6.13"; gene_source "PomBase"; gene_biotype "protein_coding"; transcript_name "SPAC13G6.13.1"; transcript_source "PomBase"; transcript_biotype "protein_coding";
I	PomBase	gene	199874	200587	.	-	.	gene_id "SPNCRNA.620"; gene_name "aps1-antisense-1"; gene_source "PomBase"; gene_biotype "ncRNA";
I	PomBase	transcript	199874	200587	.	-	.	gene_id "SPNCRNA.620"; transcript_id "SPNCRNA.620.1"; gene_name "aps1-antisense-1"; gene_source "PomBase"; gene_biotype "ncRNA"; transcript_name "aps1-antisense-1"; transcript_source "PomBase"; transcript_biotype "ncRNA";
I	PomBase	exon	199874	200587	.	-	.	gene_id "SPNCRNA.620"; transcript_id "SPNCRNA.620.1"; exon_number "1"; gene_name "aps1-antisense-1"; gene_source "PomBase"; gene_biotype "ncRNA"; transcript_name "aps1-antisense-1"; transcript_source "PomBase"; transcript_biotype "ncRNA"; exon_id "SPNCRNA.620.1:exon:1";
I	PomBase	gene	200121	201517	.	+	.	gene_id "SPAC13G6.14"; gene_name "aps1"; gene_source "PomBase"; gene_biotype "protein_coding";
I	PomBase	transcript	200121	201517	.	+	.	gene_id "SPAC13G6.14"; transcript_id "SPAC13G6.14.1"; gene_name "aps1"; gene_source "PomBase"; gene_biotype "protein_coding"; transcript_name "aps1"; transcript_source "PomBase"; transcript_biotype "protein_coding";
I	PomBase	exon	200121	201517	.	+	.	gene_id "SPAC13G6.14"; transcript_id "SPAC13G6.14.1"; exon_number "1"; gene_name "aps1"; gene_source "PomBase"; gene_biotype "protein_coding"; transcript_name "aps1"; transcript_source "PomBase"; transcript_biotype "protein_coding"; exon_id "SPAC13G6.14.1:exon:1";
I	PomBase	CDS	200235	200867	.	+	0	gene_id "SPAC13G6.14"; transcript_id "SPAC13G6.14.1"; exon_number "1"; gene_name "aps1"; gene_source "PomBase"; gene_biotype "protein_coding"; transcript_name "aps1"; transcript_source "PomBase"; transcript_biotype "protein_coding"; protein_id "SPAC13G6.14.1:pep";
I	PomBase	start_codon	200235	200237	.	+	0	gene_id "SPAC13G6.14"; transcript_id "SPAC13G6.14.1"; exon_number "1"; gene_name "aps1"; gene_source "PomBase"; gene_biotype "protein_coding"; transcript_name "aps1"; transcript_source "PomBase"; transcript_biotype "protein_coding";
I	PomBase	five_prime_utr	200121	200234	.	+	.	gene_id "SPAC13G6.14"; transcript_id "SPAC13G6.14.1"; gene_name "aps1"; gene_source "PomBase"; gene_biotype "protein_coding"; transcript_name "aps1"; transcript_source "PomBase"; transcript_biotype "protein_coding";
I	PomBase	three_prime_utr	200868	201517	.	+	.	gene_id "SPAC13G6.14"; transcript_id "SPAC13G6.14.1"; gene_name "aps1"; gene_source "PomBase"; gene_biotype "protein_coding"; transcript_name "aps1"; transcript_source "PomBase"; transcript_biotype "protein_coding";
I	PomBase	gene	201729	203346	.	-	.	gene_id "SPAC13G6.15c"; gene_name "SPAC13G6.15c"; gene_source "PomBase"; gene_biotype "protein_coding";
I	PomBase	transcript	201729	203346	.	-	.	gene_id "SPAC13G6.15c"; transcript_id "SPAC13G6.15c.1"; gene_name "SPAC13G6.15c"; gene_source "PomBase"; gene_biotype "protein_coding"; transcript_name "SPAC13G6.15c.1"; transcript_source "PomBase"; transcript_biotype "protein_coding";
I	PomBase	exon	201729	203346	.	-	.	gene_id "SPAC13G6.15c"; transcript_id "SPAC13G6.15c.1"; exon_number "1"; gene_name "SPAC13G6.15c"; gene_source "PomBase"; gene_biotype "protein_coding"; transcript_name "SPAC13G6.15c.1"; transcript_source "PomBase"; transcript_biotype "protein_coding"; exon_id "SPAC13G6.15c.1:exon:1";
I	PomBase	CDS	202487	202978	.	-	0	gene_id "SPAC13G6.15c"; transcript_id "SPAC13G6.15c.1"; exon_number "1"; gene_name "SPAC13G6.15c"; gene_source "PomBase"; gene_biotype "protein_coding"; transcript_name "SPAC13G6.15c.1"; transcript_source "PomBase"; transcript_biotype "protein_coding"; protein_id "SPAC13G6.15c.1:pep";
I	PomBase	start_codon	202976	202978	.	-	0	gene_id "SPAC13G6.15c"; transcript_id "SPAC13G6.15c.1"; exon_number "1"; gene_name "SPAC13G6.15c"; gene_source "PomBase"; gene_biotype "protein_coding"; transcript_name "SPAC13G6.15c.1"; transcript_source "PomBase"; transcript_biotype "protein_coding";
I	PomBase	five_prime_utr	202979	203346	.	-	.	gene_id "SPAC13G6.15c"; transcript_id "SPAC13G6.15c.1"; gene_name "SPAC13G6.15c"; gene_source "PomBase"; gene_biotype "protein_coding"; transcript_name "SPAC13G6.15c.1"; transcript_source "PomBase"; transcript_biotype "protein_coding";
I	PomBase	three_prime_utr	201729	202486	.	-	.	gene_id "SPAC13G6.15c"; transcript_id "SPAC13G6.15c.1"; gene_name "SPAC13G6.15c"; gene_source "PomBase"; gene_biotype "protein_coding"; transcript_name "SPAC13G6.15c.1"; transcript_source "PomBase"; transcript_biotype "protein_coding";
I	PomBase	gene	203597	204322	.	-	.	gene_id "SPNCRNA.621"; gene_name "SPNCRNA.621"; gene_source "PomBase"; gene_biotype "ncRNA";
I	PomBase	transcript	203597	204322	.	-	.	gene_id "SPNCRNA.621"; transcript_id "SPNCRNA.621.1"; gene_name "SPNCRNA.621"; gene_source "PomBase"; gene_biotype "ncRNA"; transcript_name "SPNCRNA.621.1"; transcript_source "PomBase"; transcript_biotype "ncRNA";
I	PomBase	exon	203597	204322	.	-	.	gene_id "SPNCRNA.621"; transcript_id "SPNCRNA.621.1"; exon_number "1"; gene_name "SPNCRNA.621"; gene_source "PomBase"; gene_biotype "ncRNA"; transcript_name "SPNCRNA.621.1"; transcript_source "PomBase"; transcript_biotype "ncRNA"; exon_id "SPNCRNA.621.1:exon:1";
I	PomBase	gene	204386	206081	.	+	.	gene_id "SPAC24B11.05"; gene_name "SPAC24B11.05"; gene_source "PomBase"; gene_biotype "protein_coding";
I	PomBase	transcript	204386	206081	.	+	.	gene_id "SPAC24B11.05"; transcript_id "SPAC24B11.05.1"; gene_name "SPAC24B11.05"; gene_source "PomBase"; gene_biotype "protein_coding"; transcript_name "SPAC24B11.05.1"; transcript_source "PomBase"; transcript_biotype "protein_coding";
I	PomBase	exon	204386	206081	.	+	.	gene_id "SPAC24B11.05"; transcript_id "SPAC24B11.05.1"; exon_number "1"; gene_name "SPAC24B11.05"; gene_source "PomBase"; gene_biotype "protein_coding"; transcript_name "SPAC24B11.05.1"; transcript_source "PomBase"; transcript_biotype "protein_coding"; exon_id "SPAC24B11.05.1:exon:1";
I	PomBase	CDS	205213	205893	.	+	0	gene_id "SPAC24B11.05"; transcript_id "SPAC24B11.05.1"; exon_number "1"; gene_name "SPAC24B11.05"; gene_source "PomBase"; gene_biotype "protein_coding"; transcript_name "SPAC24B11.05.1"; transcript_source "PomBase"; transcript_biotype "protein_coding"; protein_id "SPAC24B11.05.1:pep";
I	PomBase	start_codon	205213	205215	.	+	0	gene_id "SPAC24B11.05"; transcript_id "SPAC24B11.05.1"; exon_number "1"; gene_name "SPAC24B11.05"; gene_source "PomBase"; gene_biotype "protein_coding"; transcript_name "SPAC24B11.05.1"; transcript_source "PomBase"; transcript_biotype "protein_coding";
I	PomBase	five_prime_utr	204386	205212	.	+	.	gene_id "SPAC24B11.05"; transcript_id "SPAC24B11.05.1"; gene_name "SPAC24B11.05"; gene_source "PomBase"; gene_biotype "protein_coding"; transcript_name "SPAC24B11.05.1"; transcript_source "PomBase"; transcript_biotype "protein_coding";
I	PomBase	three_prime_utr	205894	206081	.	+	.	gene_id "SPAC24B11.05"; transcript_id "SPAC24B11.05.1"; gene_name "SPAC24B11.05"; gene_source "PomBase"; gene_biotype "protein_coding"; transcript_name "SPAC24B11.05.1"; transcript_source "PomBase"; transcript_biotype "protein_coding";
I	PomBase	gene	206476	208044	.	-	.	gene_id "SPAC24B11.06c"; gene_name "sty1"; gene_source "PomBase"; gene_biotype "protein_coding";
I	PomBase	transcript	206476	208044	.	-	.	gene_id "SPAC24B11.06c"; transcript_id "SPAC24B11.06c.1"; gene_name "sty1"; gene_source "PomBase"; gene_biotype "protein_coding"; transcript_name "sty1"; transcript_source "PomBase"; transcript_biotype "protein_coding";
I	PomBase	exon	206476	208044	.	-	.	gene_id "SPAC24B11.06c"; transcript_id "SPAC24B11.06c.1"; exon_number "1"; gene_name "sty1"; gene_source "PomBase"; gene_biotype "protein_coding"; transcript_name "sty1"; transcript_source "PomBase"; transcript_biotype "protein_coding"; exon_id "SPAC24B11.06c.1:exon:1";
I	PomBase	CDS	206864	207913	.	-	0	gene_id "SPAC24B11.06c"; transcript_id "SPAC24B11.06c.1"; exon_number "1"; gene_name "sty1"; gene_source "PomBase"; gene_biotype "protein_coding"; transcript_name "sty1"; transcript_source "PomBase"; transcript_biotype "protein_coding"; protein_id "SPAC24B11.06c.1:pep";
I	PomBase	start_codon	207911	207913	.	-	0	gene_id "SPAC24B11.06c"; transcript_id "SPAC24B11.06c.1"; exon_number "1"; gene_name "sty1"; gene_source "PomBase"; gene_biotype "protein_coding"; transcript_name "sty1"; transcript_source "PomBase"; transcript_biotype "protein_coding";
I	PomBase	five_prime_utr	207914	208044	.	-	.	gene_id "SPAC24B11.06c"; transcript_id "SPAC24B11.06c.1"; gene_name "sty1"; gene_source "PomBase"; gene_biotype "protein_coding"; transcript_name "sty1"; transcript_source "PomBase"; transcript_biotype "protein_coding";
I	PomBase	three_prime_utr	206476	206863	.	-	.	gene_id "SPAC24B11.06c"; transcript_id "SPAC24B11.06c.1"; gene_name "sty1"; gene_source "PomBase"; gene_biotype "protein_coding"; transcript_name "sty1"; transcript_source "PomBase"; transcript_biotype "protein_coding";
I	PomBase	gene	206775	209401	.	+	.	gene_id "SPNCRNA.622"; gene_name "sty1-antisense-1"; gene_source "PomBase"; gene_biotype "ncRNA";
I	PomBase	transcript	206775	209401	.	+	.	gene_id "SPNCRNA.622"; transcript_id "SPNCRNA.622.1"; gene_name "sty1-antisense-1"; gene_source "PomBase"; gene_biotype "ncRNA"; transcript_name "sty1-antisense-1"; transcript_source "PomBase"; transcript_biotype "ncRNA";
I	PomBase	exon	206775	209401	.	+	.	gene_id "SPNCRNA.622"; transcript_id "SPNCRNA.622.1"; exon_number "1"; gene_name "sty1-antisense-1"; gene_source "PomBase"; gene_biotype "ncRNA"; transcript_name "sty1-antisense-1"; transcript_source "PomBase"; transcript_biotype "ncRNA"; exon_id "SPNCRNA.622.1:exon:1";
I	PomBase	gene	208839	211275	.	-	.	gene_id "SPAC24B11.07c"; gene_name "SPAC24B11.07c"; gene_source "PomBase"; gene_biotype "protein_coding";
I	PomBase	transcript	208839	211275	.	-	.	gene_id "SPAC24B11.07c"; transcript_id "SPAC24B11.07c.1"; gene_name "SPAC24B11.07c"; gene_source "PomBase"; gene_biotype "protein_coding"; transcript_name "SPAC24B11.07c.1"; transcript_source "PomBase"; transcript_biotype "protein_coding";
I	PomBase	exon	208839	211275	.	-	.	gene_id "SPAC24B11.07c"; transcript_id "SPAC24B11.07c.1"; exon_number "1"; gene_name "SPAC24B11.07c"; gene_source "PomBase"; gene_biotype "protein_coding"; transcript_name "SPAC24B11.07c.1"; transcript_source "PomBase"; transcript_biotype "protein_coding"; exon_id "SPAC24B11.07c.1:exon:1";
I	PomBase	CDS	209349	211031	.	-	0	gene_id "SPAC24B11.07c"; transcript_id "SPAC24B11.07c.1"; exon_number "1"; gene_name "SPAC24B11.07c"; gene_source "PomBase"; gene_biotype "protein_coding"; transcript_name "SPAC24B11.07c.1"; transcript_source "PomBase"; transcript_biotype "protein_coding"; protein_id "SPAC24B11.07c.1:pep";
I	PomBase	start_codon	211029	211031	.	-	0	gene_id "SPAC24B11.07c"; transcript_id "SPAC24B11.07c.1"; exon_number "1"; gene_name "SPAC24B11.07c"; gene_source "PomBase"; gene_biotype "protein_coding"; transcript_name "SPAC24B11.07c.1"; transcript_source "PomBase"; transcript_biotype "protein_coding";
I	PomBase	stop_codon	209346	209348	.	-	0	gene_id "SPAC24B11.07c"; transcript_id "SPAC24B11.07c.1"; exon_number "1"; gene_name "SPAC24B11.07c"; gene_source "PomBase"; gene_biotype "protein_coding"; transcript_name "SPAC24B11.07c.1"; transcript_source "PomBase"; transcript_biotype "protein_coding";
I	PomBase	five_prime_utr	211032	211275	.	-	.	gene_id "SPAC24B11.07c"; transcript_id "SPAC24B11.07c.1"; gene_name "SPAC24B11.07c"; gene_source "PomBase"; gene_biotype "protein_coding"; transcript_name "SPAC24B11.07c.1"; transcript_source "PomBase"; transcript_biotype "protein_coding";
I	PomBase	three_prime_utr	208839	209345	.	-	.	gene_id "SPAC24B11.07c"; transcript_id "SPAC24B11.07c.1"; gene_name "SPAC24B11.07c"; gene_source "PomBase"; gene_biotype "protein_coding"; transcript_name "SPAC24B11.07c.1"; transcript_source "PomBase"; transcript_biotype "protein_coding";
I	PomBase	gene	211714	213591	.	-	.	gene_id "SPAC24B11.08c"; gene_name "SPAC24B11.08c"; gene_source "PomBase"; gene_biotype "protein_coding";
I	PomBase	transcript	211714	213591	.	-	.	gene_id "SPAC24B11.08c"; transcript_id "SPAC24B11.08c.1"; gene_name "SPAC24B11.08c"; gene_source "PomBase"; gene_biotype "protein_coding"; transcript_name "SPAC24B11.08c.1"; transcript_source "PomBase"; transcript_biotype "protein_coding";
I	PomBase	exon	211714	213591	.	-	.	gene_id "SPAC24B11.08c"; transcript_id "SPAC24B11.08c.1"; exon_number "1"; gene_name "SPAC24B11.08c"; gene_source "PomBase"; gene_biotype "protein_coding"; transcript_name "SPAC24B11.08c.1"; transcript_source "PomBase"; transcript_biotype "protein_coding"; exon_id "SPAC24B11.08c.1:exon:1";
I	PomBase	CDS	212034	213206	.	-	0	gene_id "SPAC24B11.08c"; transcript_id "SPAC24B11.08c.1"; exon_number "1"; gene_name "SPAC24B11.08c"; gene_source "PomBase"; gene_biotype "protein_coding"; transcript_name "SPAC24B11.08c.1"; transcript_source "PomBase"; transcript_biotype "protein_coding"; protein_id "SPAC24B11.08c.1:pep";
I	PomBase	start_codon	213204	213206	.	-	0	gene_id "SPAC24B11.08c"; transcript_id "SPAC24B11.08c.1"; exon_number "1"; gene_name "SPAC24B11.08c"; gene_source "PomBase"; gene_biotype "protein_coding"; transcript_name "SPAC24B11.08c.1"; transcript_source "PomBase"; transcript_biotype "protein_coding";
I	PomBase	five_prime_utr	213207	213591	.	-	.	gene_id "SPAC24B11.08c"; transcript_id "SPAC24B11.08c.1"; gene_name "SPAC24B11.08c"; gene_source "PomBase"; gene_biotype "protein_coding"; transcript_name "SPAC24B11.08c.1"; transcript_source "PomBase"; transcript_biotype "protein_coding";
I	PomBase	three_prime_utr	211714	212033	.	-	.	gene_id "SPAC24B11.08c"; transcript_id "SPAC24B11.08c.1"; gene_name "SPAC24B11.08c"; gene_source "PomBase"; gene_biotype "protein_coding"; transcript_name "SPAC24B11.08c.1"; transcript_source "PomBase"; transcript_biotype "protein_coding";
I	PomBase	gene	213527	215928	.	-	.	gene_id "SPNCRNA.623"; gene_name "SPNCRNA.623"; gene_source "PomBase"; gene_biotype "ncRNA";
I	PomBase	transcript	213527	215928	.	-	.	gene_id "SPNCRNA.623"; transcript_id "SPNCRNA.623.1"; gene_name "SPNCRNA.623"; gene_source "PomBase"; gene_biotype "ncRNA"; transcript_name "SPNCRNA.623.1"; transcript_source "PomBase"; transcript_biotype "ncRNA";
I	PomBase	exon	213527	215928	.	-	.	gene_id "SPNCRNA.623"; transcript_id "SPNCRNA.623.1"; exon_number "1"; gene_name "SPNCRNA.623"; gene_source "PomBase"; gene_biotype "ncRNA"; transcript_name "SPNCRNA.623.1"; transcript_source "PomBase"; transcript_biotype "ncRNA"; exon_id "SPNCRNA.623.1:exon:1";
I	PomBase	gene	213841	214818	.	+	.	gene_id "SPNCRNA.142"; gene_name "SPNCRNA.142"; gene_source "PomBase"; gene_biotype "ncRNA";
I	PomBase	transcript	213841	214818	.	+	.	gene_id "SPNCRNA.142"; transcript_id "SPNCRNA.142.1"; gene_name "SPNCRNA.142"; gene_source "PomBase"; gene_biotype "ncRNA"; transcript_name "SPNCRNA.142.1"; transcript_source "PomBase"; transcript_biotype "ncRNA";
I	PomBase	exon	213841	214818	.	+	.	gene_id "SPNCRNA.142"; transcript_id "SPNCRNA.142.1"; exon_number "1"; gene_name "SPNCRNA.142"; gene_source "PomBase"; gene_biotype "ncRNA"; transcript_name "SPNCRNA.142.1"; transcript_source "PomBase"; transcript_biotype "ncRNA"; exon_id "SPNCRNA.142.1:exon:1";
I	PomBase	gene	214093	216962	.	+	.	gene_id "SPAC24B11.09"; gene_name "mpc2"; gene_source "PomBase"; gene_biotype "protein_coding";
I	PomBase	transcript	214093	216962	.	+	.	gene_id "SPAC24B11.09"; transcript_id "SPAC24B11.09.1"; gene_name "mpc2"; gene_source "PomBase"; gene_biotype "protein_coding"; transcript_name "mpc2"; transcript_source "PomBase"; transcript_biotype "protein_coding";
I	PomBase	exon	214093	216962	.	+	.	gene_id "SPAC24B11.09"; transcript_id "SPAC24B11.09.1"; exon_number "1"; gene_name "mpc2"; gene_source "PomBase"; gene_biotype "protein_coding"; transcript_name "mpc2"; transcript_source "PomBase"; transcript_biotype "protein_coding"; exon_id "SPAC24B11.09.1:exon:1";
I	PomBase	CDS	216483	216836	.	+	0	gene_id "SPAC24B11.09"; transcript_id "SPAC24B11.09.1"; exon_number "1"; gene_name "mpc2"; gene_source "PomBase"; gene_biotype "protein_coding"; transcript_name "mpc2"; transcript_source "PomBase"; transcript_biotype "protein_coding"; protein_id "SPAC24B11.09.1:pep";
I	PomBase	start_codon	216483	216485	.	+	0	gene_id "SPAC24B11.09"; transcript_id "SPAC24B11.09.1"; exon_number "1"; gene_name "mpc2"; gene_source "PomBase"; gene_biotype "protein_coding"; transcript_name "mpc2"; transcript_source "PomBase"; transcript_biotype "protein_coding";
I	PomBase	stop_codon	216837	216839	.	+	0	gene_id "SPAC24B11.09"; transcript_id "SPAC24B11.09.1"; exon_number "1"; gene_name "mpc2"; gene_source "PomBase"; gene_biotype "protein_coding"; transcript_name "mpc2"; transcript_source "PomBase"; transcript_biotype "protein_coding";
I	PomBase	five_prime_utr	214093	216482	.	+	.	gene_id "SPAC24B11.09"; transcript_id "SPAC24B11.09.1"; gene_name "mpc2"; gene_source "PomBase"; gene_biotype "protein_coding"; transcript_name "mpc2"; transcript_source "PomBase"; transcript_biotype "protein_coding";
I	PomBase	three_prime_utr	216840	216962	.	+	.	gene_id "SPAC24B11.09"; transcript_id "SPAC24B11.09.1"; gene_name "mpc2"; gene_source "PomBase"; gene_biotype "protein_coding"; transcript_name "mpc2"; transcript_source "PomBase"; transcript_biotype "protein_coding";
I	PomBase	gene	218260	221562	.	-	.	gene_id "SPAC24B11.10c"; gene_name "cfh1"; gene_source "PomBase"; gene_biotype "protein_coding";
I	PomBase	transcript	218260	221562	.	-	.	gene_id "SPAC24B11.10c"; transcript_id "SPAC24B11.10c.1"; gene_name "cfh1"; gene_source "PomBase"; gene_biotype "protein_coding"; transcript_name "cfh1"; transcript_source "PomBase"; transcript_biotype "protein_coding";
I	PomBase	exon	218260	221562	.	-	.	gene_id "SPAC24B11.10c"; transcript_id "SPAC24B11.10c.1"; exon_number "1"; gene_name "cfh1"; gene_source "PomBase"; gene_biotype "protein_coding"; transcript_name "cfh1"; transcript_source "PomBase"; transcript_biotype "protein_coding"; exon_id "SPAC24B11.10c.1:exon:1";
I	PomBase	CDS	218657	221455	.	-	0	gene_id "SPAC24B11.10c"; transcript_id "SPAC24B11.10c.1"; exon_number "1"; gene_name "cfh1"; gene_source "PomBase"; gene_biotype "protein_coding"; transcript_name "cfh1"; transcript_source "PomBase"; transcript_biotype "protein_coding"; protein_id "SPAC24B11.10c.1:pep";
I	PomBase	start_codon	221453	221455	.	-	0	gene_id "SPAC24B11.10c"; transcript_id "SPAC24B11.10c.1"; exon_number "1"; gene_name "cfh1"; gene_source "PomBase"; gene_biotype "protein_coding"; transcript_name "cfh1"; transcript_source "PomBase"; transcript_biotype "protein_coding";
I	PomBase	five_prime_utr	221456	221562	.	-	.	gene_id "SPAC24B11.10c"; transcript_id "SPAC24B11.10c.1"; gene_name "cfh1"; gene_source "PomBase"; gene_biotype "protein_coding"; transcript_name "cfh1"; transcript_source "PomBase"; transcript_biotype "protein_coding";
I	PomBase	three_prime_utr	218260	218656	.	-	.	gene_id "SPAC24B11.10c"; transcript_id "SPAC24B11.10c.1"; gene_name "cfh1"; gene_source "PomBase"; gene_biotype "protein_coding"; transcript_name "cfh1"; transcript_source "PomBase"; transcript_biotype "protein_coding";
I	PomBase	gene	221694	223991	.	-	.	gene_id "SPAC24B11.11c"; gene_name "sid2"; gene_source "PomBase"; gene_biotype "protein_coding";
I	PomBase	transcript	221694	223991	.	-	.	gene_id "SPAC24B11.11c"; transcript_id "SPAC24B11.11c.1"; gene_name "sid2"; gene_source "PomBase"; gene_biotype "protein_coding"; transcript_name "sid2"; transcript_source "PomBase"; transcript_biotype "protein_coding";
I	PomBase	exon	221694	223991	.	-	.	gene_id "SPAC24B11.11c"; transcript_id "SPAC24B11.11c.1"; exon_number "1"; gene_name "sid2"; gene_source "PomBase"; gene_biotype "protein_coding"; transcript_name "sid2"; transcript_source "PomBase"; transcript_biotype "protein_coding"; exon_id "SPAC24B11.11c.1:exon:1";
I	PomBase	CDS	222029	223852	.	-	0	gene_id "SPAC24B11.11c"; transcript_id "SPAC24B11.11c.1"; exon_number "1"; gene_name "sid2"; gene_source "PomBase"; gene_biotype "protein_coding"; transcript_name "sid2"; transcript_source "PomBase"; transcript_biotype "protein_coding"; protein_id "SPAC24B11.11c.1:pep";
I	PomBase	start_codon	223850	223852	.	-	0	gene_id "SPAC24B11.11c"; transcript_id "SPAC24B11.11c.1"; exon_number "1"; gene_name "sid2"; gene_source "PomBase"; gene_biotype "protein_coding"; transcript_name "sid2"; transcript_source "PomBase"; transcript_biotype "protein_coding";
I	PomBase	five_prime_utr	223853	223991	.	-	.	gene_id "SPAC24B11.11c"; transcript_id "SPAC24B11.11c.1"; gene_name "sid2"; gene_source "PomBase"; gene_biotype "protein_coding"; transcript_name "sid2"; transcript_source "PomBase"; transcript_biotype "protein_coding";
I	PomBase	three_prime_utr	221694	222028	.	-	.	gene_id "SPAC24B11.11c"; transcript_id "SPAC24B11.11c.1"; gene_name "sid2"; gene_source "PomBase"; gene_biotype "protein_coding"; transcript_name "sid2"; transcript_source "PomBase"; transcript_biotype "protein_coding";
I	PomBase	gene	224080	229307	.	-	.	gene_id "SPAC24B11.12c"; gene_name "SPAC24B11.12c"; gene_source "PomBase"; gene_biotype "protein_coding";
I	PomBase	transcript	224080	229307	.	-	.	gene_id "SPAC24B11.12c"; transcript_id "SPAC24B11.12c.1"; gene_name "SPAC24B11.12c"; gene_source "PomBase"; gene_biotype "protein_coding"; transcript_name "SPAC24B11.12c.1"; transcript_source "PomBase"; transcript_biotype "protein_coding";
I	PomBase	exon	228312	229307	.	-	.	gene_id "SPAC24B11.12c"; transcript_id "SPAC24B11.12c.1"; exon_number "1"; gene_name "SPAC24B11.12c"; gene_source "PomBase"; gene_biotype "protein_coding"; transcript_name "SPAC24B11.12c.1"; transcript_source "PomBase"; transcript_biotype "protein_coding"; exon_id "SPAC24B11.12c.1:exon:1";
I	PomBase	CDS	228312	228683	.	-	0	gene_id "SPAC24B11.12c"; transcript_id "SPAC24B11.12c.1"; exon_number "1"; gene_name "SPAC24B11.12c"; gene_source "PomBase"; gene_biotype "protein_coding"; transcript_name "SPAC24B11.12c.1"; transcript_source "PomBase"; transcript_biotype "protein_coding"; protein_id "SPAC24B11.12c.1:pep";
I	PomBase	start_codon	228681	228683	.	-	0	gene_id "SPAC24B11.12c"; transcript_id "SPAC24B11.12c.1"; exon_number "1"; gene_name "SPAC24B11.12c"; gene_source "PomBase"; gene_biotype "protein_coding"; transcript_name "SPAC24B11.12c.1"; transcript_source "PomBase"; transcript_biotype "protein_coding";
I	PomBase	exon	224080	228232	.	-	.	gene_id "SPAC24B11.12c"; transcript_id "SPAC24B11.12c.1"; exon_number "2"; gene_name "SPAC24B11.12c"; gene_source "PomBase"; gene_biotype "protein_coding"; transcript_name "SPAC24B11.12c.1"; transcript_source "PomBase"; transcript_biotype "protein_coding"; exon_id "SPAC24B11.12c.1:exon:2";
I	PomBase	CDS	224399	228232	.	-	0	gene_id "SPAC24B11.12c"; transcript_id "SPAC24B11.12c.1"; exon_number "2"; gene_name "SPAC24B11.12c"; gene_source "PomBase"; gene_biotype "protein_coding"; transcript_name "SPAC24B11.12c.1"; transcript_source "PomBase"; transcript_biotype "protein_coding"; protein_id "SPAC24B11.12c.1:pep";
I	PomBase	stop_codon	224396	224398	.	-	0	gene_id "SPAC24B11.12c"; transcript_id "SPAC24B11.12c.1"; exon_number "2"; gene_name "SPAC24B11.12c"; gene_source "PomBase"; gene_biotype "protein_coding"; transcript_name "SPAC24B11.12c.1"; transcript_source "PomBase"; transcript_biotype "protein_coding";
I	PomBase	five_prime_utr	228684	229307	.	-	.	gene_id "SPAC24B11.12c"; transcript_id "SPAC24B11.12c.1"; gene_name "SPAC24B11.12c"; gene_source "PomBase"; gene_biotype "protein_coding"; transcript_name "SPAC24B11.12c.1"; transcript_source "PomBase"; transcript_biotype "protein_coding";
I	PomBase	three_prime_utr	224080	224395	.	-	.	gene_id "SPAC24B11.12c"; transcript_id "SPAC24B11.12c.1"; gene_name "SPAC24B11.12c"; gene_source "PomBase"; gene_biotype "protein_coding"; transcript_name "SPAC24B11.12c.1"; transcript_source "PomBase"; transcript_biotype "protein_coding";
I	PomBase	gene	229270	230855	.	-	.	gene_id "SPNCRNA.624"; gene_name "SPAC24B11.14-antisense-1"; gene_source "PomBase"; gene_biotype "ncRNA";
I	PomBase	transcript	229270	230855	.	-	.	gene_id "SPNCRNA.624"; transcript_id "SPNCRNA.624.1"; gene_name "SPAC24B11.14-antisense-1"; gene_source "PomBase"; gene_biotype "ncRNA"; transcript_name "SPAC24B11.14-antisense-1"; transcript_source "PomBase"; transcript_biotype "ncRNA";
I	PomBase	exon	229270	230855	.	-	.	gene_id "SPNCRNA.624"; transcript_id "SPNCRNA.624.1"; exon_number "1"; gene_name "SPAC24B11.14-antisense-1"; gene_source "PomBase"; gene_biotype "ncRNA"; transcript_name "SPAC24B11.14-antisense-1"; transcript_source "PomBase"; transcript_biotype "ncRNA"; exon_id "SPNCRNA.624.1:exon:1";
I	PomBase	gene	230545	231136	.	+	.	gene_id "SPAC24B11.14"; gene_name "SPAC24B11.14"; gene_source "PomBase"; gene_biotype "protein_coding";
I	PomBase	transcript	230545	231136	.	+	.	gene_id "SPAC24B11.14"; transcript_id "SPAC24B11.14.1"; gene_name "SPAC24B11.14"; gene_source "PomBase"; gene_biotype "protein_coding"; transcript_name "SPAC24B11.14.1"; transcript_source "PomBase"; transcript_biotype "protein_coding";
I	PomBase	exon	230545	230681	.	+	.	gene_id "SPAC24B11.14"; transcript_id "SPAC24B11.14.1"; exon_number "1"; gene_name "SPAC24B11.14"; gene_source "PomBase"; gene_biotype "protein_coding"; transcript_name "SPAC24B11.14.1"; transcript_source "PomBase"; transcript_biotype "protein_coding"; exon_id "SPAC24B11.14.1:exon:1";
I	PomBase	CDS	230545	230681	.	+	0	gene_id "SPAC24B11.14"; transcript_id "SPAC24B11.14.1"; exon_number "1"; gene_name "SPAC24B11.14"; gene_source "PomBase"; gene_biotype "protein_coding"; transcript_name "SPAC24B11.14.1"; transcript_source "PomBase"; transcript_biotype "protein_coding"; protein_id "SPAC24B11.14.1:pep";
I	PomBase	start_codon	230545	230547	.	+	0	gene_id "SPAC24B11.14"; transcript_id "SPAC24B11.14.1"; exon_number "1"; gene_name "SPAC24B11.14"; gene_source "PomBase"; gene_biotype "protein_coding"; transcript_name "SPAC24B11.14.1"; transcript_source "PomBase"; transcript_biotype "protein_coding";
I	PomBase	exon	230743	230799	.	+	.	gene_id "SPAC24B11.14"; transcript_id "SPAC24B11.14.1"; exon_number "2"; gene_name "SPAC24B11.14"; gene_source "PomBase"; gene_biotype "protein_coding"; transcript_name "SPAC24B11.14.1"; transcript_source "PomBase"; transcript_biotype "protein_coding"; exon_id "SPAC24B11.14.1:exon:2";
I	PomBase	CDS	230743	230799	.	+	1	gene_id "SPAC24B11.14"; transcript_id "SPAC24B11.14.1"; exon_number "2"; gene_name "SPAC24B11.14"; gene_source "PomBase"; gene_biotype "protein_coding"; transcript_name "SPAC24B11.14.1"; transcript_source "PomBase"; transcript_biotype "protein_coding"; protein_id "SPAC24B11.14.1:pep";
I	PomBase	exon	230830	231136	.	+	.	gene_id "SPAC24B11.14"; transcript_id "SPAC24B11.14.1"; exon_number "3"; gene_name "SPAC24B11.14"; gene_source "PomBase"; gene_biotype "protein_coding"; transcript_name "SPAC24B11.14.1"; transcript_source "PomBase"; transcript_biotype "protein_coding"; exon_id "SPAC24B11.14.1:exon:3";
I	PomBase	CDS	230830	231136	.	+	1	gene_id "SPAC24B11.14"; transcript_id "SPAC24B11.14.1"; exon_number "3"; gene_name "SPAC24B11.14"; gene_source "PomBase"; gene_biotype "protein_coding"; transcript_name "SPAC24B11.14.1"; transcript_source "PomBase"; transcript_biotype "protein_coding"; protein_id "SPAC24B11.14.1:pep";
I	PomBase	gene	231311	233488	.	+	.	gene_id "SPAC24B11.13"; gene_name "hem3"; gene_source "PomBase"; gene_biotype "protein_coding";
I	PomBase	transcript	231311	233488	.	+	.	gene_id "SPAC24B11.13"; transcript_id "SPAC24B11.13.1"; gene_name "hem3"; gene_source "PomBase"; gene_biotype "protein_coding"; transcript_name "hem3"; transcript_source "PomBase"; transcript_biotype "protein_coding";
I	PomBase	exon	231311	233488	.	+	.	gene_id "SPAC24B11.13"; transcript_id "SPAC24B11.13.1"; exon_number "1"; gene_name "hem3"; gene_source "PomBase"; gene_biotype "protein_coding"; transcript_name "hem3"; transcript_source "PomBase"; transcript_biotype "protein_coding"; exon_id "SPAC24B11.13.1:exon:1";
I	PomBase	CDS	231655	232665	.	+	0	gene_id "SPAC24B11.13"; transcript_id "SPAC24B11.13.1"; exon_number "1"; gene_name "hem3"; gene_source "PomBase"; gene_biotype "protein_coding"; transcript_name "hem3"; transcript_source "PomBase"; transcript_biotype "protein_coding"; protein_id "SPAC24B11.13.1:pep";
I	PomBase	start_codon	231655	231657	.	+	0	gene_id "SPAC24B11.13"; transcript_id "SPAC24B11.13.1"; exon_number "1"; gene_name "hem3"; gene_source "PomBase"; gene_biotype "protein_coding"; transcript_name "hem3"; transcript_source "PomBase"; transcript_biotype "protein_coding";
I	PomBase	five_prime_utr	231311	231654	.	+	.	gene_id "SPAC24B11.13"; transcript_id "SPAC24B11.13.1"; gene_name "hem3"; gene_source "PomBase"; gene_biotype "protein_coding"; transcript_name "hem3"; transcript_source "PomBase"; transcript_biotype "protein_coding";
I	PomBase	three_prime_utr	232666	233488	.	+	.	gene_id "SPAC24B11.13"; transcript_id "SPAC24B11.13.1"; gene_name "hem3"; gene_source "PomBase"; gene_biotype "protein_coding"; transcript_name "hem3"; transcript_source "PomBase"; transcript_biotype "protein_coding";
I	PomBase	gene	233032	235164	.	-	.	gene_id "SPAC806.02c"; gene_name "SPAC806.02c"; gene_source "PomBase"; gene_biotype "protein_coding";
I	PomBase	transcript	233032	235164	.	-	.	gene_id "SPAC806.02c"; transcript_id "SPAC806.02c.1"; gene_name "SPAC806.02c"; gene_source "PomBase"; gene_biotype "protein_coding"; transcript_name "SPAC806.02c.1"; transcript_source "PomBase"; transcript_biotype "protein_coding";
I	PomBase	exon	235103	235164	.	-	.	gene_id "SPAC806.02c"; transcript_id "SPAC806.02c.1"; exon_number "1"; gene_name "SPAC806.02c"; gene_source "PomBase"; gene_biotype "protein_coding"; transcript_name "SPAC806.02c.1"; transcript_source "PomBase"; transcript_biotype "protein_coding"; exon_id "SPAC806.02c.1:exon:1";
I	PomBase	CDS	235103	235106	.	-	0	gene_id "SPAC806.02c"; transcript_id "SPAC806.02c.1"; exon_number "1"; gene_name "SPAC806.02c"; gene_source "PomBase"; gene_biotype "protein_coding"; transcript_name "SPAC806.02c.1"; transcript_source "PomBase"; transcript_biotype "protein_coding"; protein_id "SPAC806.02c.1:pep";
I	PomBase	start_codon	235104	235106	.	-	0	gene_id "SPAC806.02c"; transcript_id "SPAC806.02c.1"; exon_number "1"; gene_name "SPAC806.02c"; gene_source "PomBase"; gene_biotype "protein_coding"; transcript_name "SPAC806.02c.1"; transcript_source "PomBase"; transcript_biotype "protein_coding";
I	PomBase	exon	233032	235053	.	-	.	gene_id "SPAC806.02c"; transcript_id "SPAC806.02c.1"; exon_number "2"; gene_name "SPAC806.02c"; gene_source "PomBase"; gene_biotype "protein_coding"; transcript_name "SPAC806.02c.1"; transcript_source "PomBase"; transcript_biotype "protein_coding"; exon_id "SPAC806.02c.1:exon:2";
I	PomBase	CDS	233231	235053	.	-	2	gene_id "SPAC806.02c"; transcript_id "SPAC806.02c.1"; exon_number "2"; gene_name "SPAC806.02c"; gene_source "PomBase"; gene_biotype "protein_coding"; transcript_name "SPAC806.02c.1"; transcript_source "PomBase"; transcript_biotype "protein_coding"; protein_id "SPAC806.02c.1:pep";
I	PomBase	five_prime_utr	235107	235164	.	-	.	gene_id "SPAC806.02c"; transcript_id "SPAC806.02c.1"; gene_name "SPAC806.02c"; gene_source "PomBase"; gene_biotype "protein_coding"; transcript_name "SPAC806.02c.1"; transcript_source "PomBase"; transcript_biotype "protein_coding";
I	PomBase	three_prime_utr	233032	233230	.	-	.	gene_id "SPAC806.02c"; transcript_id "SPAC806.02c.1"; gene_name "SPAC806.02c"; gene_source "PomBase"; gene_biotype "protein_coding"; transcript_name "SPAC806.02c.1"; transcript_source "PomBase"; transcript_biotype "protein_coding";
I	PomBase	gene	235280	237141	.	+	.	gene_id "SPNCRNA.625"; gene_name "rps2601-antisense-1"; gene_source "PomBase"; gene_biotype "ncRNA";
I	PomBase	transcript	235280	237141	.	+	.	gene_id "SPNCRNA.625"; transcript_id "SPNCRNA.625.1"; gene_name "rps2601-antisense-1"; gene_source "PomBase"; gene_biotype "ncRNA"; transcript_name "rps2601-antisense-1"; transcript_source "PomBase"; transcript_biotype "ncRNA";
I	PomBase	exon	235280	237141	.	+	.	gene_id "SPNCRNA.625"; transcript_id "SPNCRNA.625.1"; exon_number "1"; gene_name "rps2601-antisense-1"; gene_source "PomBase"; gene_biotype "ncRNA"; transcript_name "rps2601-antisense-1"; transcript_source "PomBase"; transcript_biotype "ncRNA"; exon_id "SPNCRNA.625.1:exon:1";
I	PomBase	gene	235533	236104	.	-	.	gene_id "SPAC806.03c"; gene_name "rps2601"; gene_source "PomBase"; gene_biotype "protein_coding";
I	PomBase	transcript	235533	236104	.	-	.	gene_id "SPAC806.03c"; transcript_id "SPAC806.03c.1"; gene_name "rps2601"; gene_source "PomBase"; gene_biotype "protein_coding"; transcript_name "rps2601"; transcript_source "PomBase"; transcript_biotype "protein_coding";
I	PomBase	exon	235533	236104	.	-	.	gene_id "SPAC806.03c"; transcript_id "SPAC806.03c.1"; exon_number "1"; gene_name "rps2601"; gene_source "PomBase"; gene_biotype "protein_coding"; transcript_name "rps2601"; transcript_source "PomBase"; transcript_biotype "protein_coding"; exon_id "SPAC806.03c.1:exon:1";
I	PomBase	CDS	235656	236015	.	-	0	gene_id "SPAC806.03c"; transcript_id "SPAC806.03c.1"; exon_number "1"; gene_name "rps2601"; gene_source "PomBase"; gene_biotype "protein_coding"; transcript_name "rps2601"; transcript_source "PomBase"; transcript_biotype "protein_coding"; protein_id "SPAC806.03c.1:pep";
I	PomBase	start_codon	236013	236015	.	-	0	gene_id "SPAC806.03c"; transcript_id "SPAC806.03c.1"; exon_number "1"; gene_name "rps2601"; gene_source "PomBase"; gene_biotype "protein_coding"; transcript_name "rps2601"; transcript_source "PomBase"; transcript_biotype "protein_coding";
I	PomBase	stop_codon	235653	235655	.	-	0	gene_id "SPAC806.03c"; transcript_id "SPAC806.03c.1"; exon_number "1"; gene_name "rps2601"; gene_source "PomBase"; gene_biotype "protein_coding"; transcript_name "rps2601"; transcript_source "PomBase"; transcript_biotype "protein_coding";
I	PomBase	five_prime_utr	236016	236104	.	-	.	gene_id "SPAC806.03c"; transcript_id "SPAC806.03c.1"; gene_name "rps2601"; gene_source "PomBase"; gene_biotype "protein_coding"; transcript_name "rps2601"; transcript_source "PomBase"; transcript_biotype "protein_coding";
I	PomBase	three_prime_utr	235533	235652	.	-	.	gene_id "SPAC806.03c"; transcript_id "SPAC806.03c.1"; gene_name "rps2601"; gene_source "PomBase"; gene_biotype "protein_coding"; transcript_name "rps2601"; transcript_source "PomBase"; transcript_biotype "protein_coding";
I	PomBase	gene	236819	236928	.	+	.	gene_id "SPNCRNA.143"; gene_name "SPNCRNA.143"; gene_source "PomBase"; gene_biotype "ncRNA";
I	PomBase	transcript	236819	236928	.	+	.	gene_id "SPNCRNA.143"; transcript_id "SPNCRNA.143.1"; gene_name "SPNCRNA.143"; gene_source "PomBase"; gene_biotype "ncRNA"; transcript_name "SPNCRNA.143.1"; transcript_source "PomBase"; transcript_biotype "ncRNA";
I	PomBase	exon	236819	236928	.	+	.	gene_id "SPNCRNA.143"; transcript_id "SPNCRNA.143.1"; exon_number "1"; gene_name "SPNCRNA.143"; gene_source "PomBase"; gene_biotype "ncRNA"; transcript_name "SPNCRNA.143.1"; transcript_source "PomBase"; transcript_biotype "ncRNA"; exon_id "SPNCRNA.143.1:exon:1";
I	PomBase	gene	237023	237885	.	-	.	gene_id "SPAC806.11"; gene_name "SPAC806.11"; gene_source "PomBase"; gene_biotype "protein_coding";
I	PomBase	transcript	237023	237885	.	-	.	gene_id "SPAC806.11"; transcript_id "SPAC806.11.1"; gene_name "SPAC806.11"; gene_source "PomBase"; gene_biotype "protein_coding"; transcript_name "SPAC806.11.1"; transcript_source "PomBase"; transcript_biotype "protein_coding";
I	PomBase	exon	237023	237885	.	-	.	gene_id "SPAC806.11"; transcript_id "SPAC806.11.1"; exon_number "1"; gene_name "SPAC806.11"; gene_source "PomBase"; gene_biotype "protein_coding"; transcript_name "SPAC806.11.1"; transcript_source "PomBase"; transcript_biotype "protein_coding"; exon_id "SPAC806.11.1:exon:1";
I	PomBase	CDS	237215	237430	.	-	0	gene_id "SPAC806.11"; transcript_id "SPAC806.11.1"; exon_number "1"; gene_name "SPAC806.11"; gene_source "PomBase"; gene_biotype "protein_coding"; transcript_name "SPAC806.11.1"; transcript_source "PomBase"; transcript_biotype "protein_coding"; protein_id "SPAC806.11.1:pep";
I	PomBase	start_codon	237428	237430	.	-	0	gene_id "SPAC806.11"; transcript_id "SPAC806.11.1"; exon_number "1"; gene_name "SPAC806.11"; gene_source "PomBase"; gene_biotype "protein_coding"; transcript_name "SPAC806.11.1"; transcript_source "PomBase"; transcript_biotype "protein_coding";
I	PomBase	stop_codon	237212	237214	.	-	0	gene_id "SPAC806.11"; transcript_id "SPAC806.11.1"; exon_number "1"; gene_name "SPAC806.11"; gene_source "PomBase"; gene_biotype "protein_coding"; transcript_name "SPAC806.11.1"; transcript_source "PomBase"; transcript_biotype "protein_coding";
I	PomBase	five_prime_utr	237431	237885	.	-	.	gene_id "SPAC806.11"; transcript_id "SPAC806.11.1"; gene_name "SPAC806.11"; gene_source "PomBase"; gene_biotype "protein_coding"; transcript_name "SPAC806.11.1"; transcript_source "PomBase"; transcript_biotype "protein_coding";
I	PomBase	three_prime_utr	237023	237211	.	-	.	gene_id "SPAC806.11"; transcript_id "SPAC806.11.1"; gene_name "SPAC806.11"; gene_source "PomBase"; gene_biotype "protein_coding"; transcript_name "SPAC806.11.1"; transcript_source "PomBase"; transcript_biotype "protein_coding";
I	PomBase	gene	237074	237848	.	-	.	gene_id "SPNCRNA.03"; gene_name "prl3"; gene_source "PomBase"; gene_biotype "ncRNA";
I	PomBase	transcript	237074	237848	.	-	.	gene_id "SPNCRNA.03"; transcript_id "SPNCRNA.03.1"; gene_name "prl3"; gene_source "PomBase"; gene_biotype "ncRNA"; transcript_name "prl3"; transcript_source "PomBase"; transcript_biotype "ncRNA";
I	PomBase	exon	237074	237848	.	-	.	gene_id "SPNCRNA.03"; transcript_id "SPNCRNA.03.1"; exon_number "1"; gene_name "prl3"; gene_source "PomBase"; gene_biotype "ncRNA"; transcript_name "prl3"; transcript_source "PomBase"; transcript_biotype "ncRNA"; exon_id "SPNCRNA.03.1:exon:1";
I	PomBase	gene	237820	239427	.	-	.	gene_id "SPNCRNA.626"; gene_name "SPNCRNA.626"; gene_source "PomBase"; gene_biotype "ncRNA";
I	PomBase	transcript	237820	239427	.	-	.	gene_id "SPNCRNA.626"; transcript_id "SPNCRNA.626.1"; gene_name "SPNCRNA.626"; gene_source "PomBase"; gene_biotype "ncRNA"; transcript_name "SPNCRNA.626.1"; transcript_source "PomBase"; transcript_biotype "ncRNA";
I	PomBase	exon	237820	239427	.	-	.	gene_id "SPNCRNA.626"; transcript_id "SPNCRNA.626.1"; exon_number "1"; gene_name "SPNCRNA.626"; gene_source "PomBase"; gene_biotype "ncRNA"; transcript_name "SPNCRNA.626.1"; transcript_source "PomBase"; transcript_biotype "ncRNA"; exon_id "SPNCRNA.626.1:exon:1";
I	PomBase	gene	237903	238881	.	+	.	gene_id "SPNCRNA.627"; gene_name "SPNCRNA.627"; gene_source "PomBase"; gene_biotype "ncRNA";
I	PomBase	transcript	237903	238881	.	+	.	gene_id "SPNCRNA.627"; transcript_id "SPNCRNA.627.1"; gene_name "SPNCRNA.627"; gene_source "PomBase"; gene_biotype "ncRNA"; transcript_name "SPNCRNA.627.1"; transcript_source "PomBase"; transcript_biotype "ncRNA";
I	PomBase	exon	237903	238881	.	+	.	gene_id "SPNCRNA.627"; transcript_id "SPNCRNA.627.1"; exon_number "1"; gene_name "SPNCRNA.627"; gene_source "PomBase"; gene_biotype "ncRNA"; transcript_name "SPNCRNA.627.1"; transcript_source "PomBase"; transcript_biotype "ncRNA"; exon_id "SPNCRNA.627.1:exon:1";
I	PomBase	gene	238509	238898	.	+	.	gene_id "SPNCRNA.144"; gene_name "SPNCRNA.144"; gene_source "PomBase"; gene_biotype "ncRNA";
I	PomBase	transcript	238509	238898	.	+	.	gene_id "SPNCRNA.144"; transcript_id "SPNCRNA.144.1"; gene_name "SPNCRNA.144"; gene_source "PomBase"; gene_biotype "ncRNA"; transcript_name "SPNCRNA.144.1"; transcript_source "PomBase"; transcript_biotype "ncRNA";
I	PomBase	exon	238509	238898	.	+	.	gene_id "SPNCRNA.144"; transcript_id "SPNCRNA.144.1"; exon_number "1"; gene_name "SPNCRNA.144"; gene_source "PomBase"; gene_biotype "ncRNA"; transcript_name "SPNCRNA.144.1"; transcript_source "PomBase"; transcript_biotype "ncRNA"; exon_id "SPNCRNA.144.1:exon:1";
I	PomBase	gene	238998	240617	.	+	.	gene_id "SPNCRNA.628"; gene_name "SPNCRNA.628"; gene_source "PomBase"; gene_biotype "ncRNA";
I	PomBase	transcript	238998	240617	.	+	.	gene_id "SPNCRNA.628"; transcript_id "SPNCRNA.628.1"; gene_name "SPNCRNA.628"; gene_source "PomBase"; gene_biotype "ncRNA"; transcript_name "SPNCRNA.628.1"; transcript_source "PomBase"; transcript_biotype "ncRNA";
I	PomBase	exon	238998	240617	.	+	.	gene_id "SPNCRNA.628"; transcript_id "SPNCRNA.628.1"; exon_number "1"; gene_name "SPNCRNA.628"; gene_source "PomBase"; gene_biotype "ncRNA"; transcript_name "SPNCRNA.628.1"; transcript_source "PomBase"; transcript_biotype "ncRNA"; exon_id "SPNCRNA.628.1:exon:1";
I	PomBase	gene	239730	240571	.	+	.	gene_id "SPNCRNA.145"; gene_name "SPNCRNA.145"; gene_source "PomBase"; gene_biotype "ncRNA";
I	PomBase	transcript	239730	240571	.	+	.	gene_id "SPNCRNA.145"; transcript_id "SPNCRNA.145.1"; gene_name "SPNCRNA.145"; gene_source "PomBase"; gene_biotype "ncRNA"; transcript_name "SPNCRNA.145.1"; transcript_source "PomBase"; transcript_biotype "ncRNA";
I	PomBase	exon	239730	240571	.	+	.	gene_id "SPNCRNA.145"; transcript_id "SPNCRNA.145.1"; exon_number "1"; gene_name "SPNCRNA.145"; gene_source "PomBase"; gene_biotype "ncRNA"; transcript_name "SPNCRNA.145.1"; transcript_source "PomBase"; transcript_biotype "ncRNA"; exon_id "SPNCRNA.145.1:exon:1";
I	PomBase	gene	241008	243122	.	-	.	gene_id "SPAC806.04c"; gene_name "SPAC806.04c"; gene_source "PomBase"; gene_biotype "protein_coding";
I	PomBase	transcript	241008	243122	.	-	.	gene_id "SPAC806.04c"; transcript_id "SPAC806.04c.1"; gene_name "SPAC806.04c"; gene_source "PomBase"; gene_biotype "protein_coding"; transcript_name "SPAC806.04c.1"; transcript_source "PomBase"; transcript_biotype "protein_coding";
I	PomBase	exon	242917	243122	.	-	.	gene_id "SPAC806.04c"; transcript_id "SPAC806.04c.1"; exon_number "1"; gene_name "SPAC806.04c"; gene_source "PomBase"; gene_biotype "protein_coding"; transcript_name "SPAC806.04c.1"; transcript_source "PomBase"; transcript_biotype "protein_coding"; exon_id "SPAC806.04c.1:exon:1";
I	PomBase	CDS	242917	242941	.	-	0	gene_id "SPAC806.04c"; transcript_id "SPAC806.04c.1"; exon_number "1"; gene_name "SPAC806.04c"; gene_source "PomBase"; gene_biotype "protein_coding"; transcript_name "SPAC806.04c.1"; transcript_source "PomBase"; transcript_biotype "protein_coding"; protein_id "SPAC806.04c.1:pep";
I	PomBase	start_codon	242939	242941	.	-	0	gene_id "SPAC806.04c"; transcript_id "SPAC806.04c.1"; exon_number "1"; gene_name "SPAC806.04c"; gene_source "PomBase"; gene_biotype "protein_coding"; transcript_name "SPAC806.04c.1"; transcript_source "PomBase"; transcript_biotype "protein_coding";
I	PomBase	exon	241757	242815	.	-	.	gene_id "SPAC806.04c"; transcript_id "SPAC806.04c.1"; exon_number "2"; gene_name "SPAC806.04c"; gene_source "PomBase"; gene_biotype "protein_coding"; transcript_name "SPAC806.04c.1"; transcript_source "PomBase"; transcript_biotype "protein_coding"; exon_id "SPAC806.04c.1:exon:2";
I	PomBase	CDS	241757	242815	.	-	2	gene_id "SPAC806.04c"; transcript_id "SPAC806.04c.1"; exon_number "2"; gene_name "SPAC806.04c"; gene_source "PomBase"; gene_biotype "protein_coding"; transcript_name "SPAC806.04c.1"; transcript_source "PomBase"; transcript_biotype "protein_coding"; protein_id "SPAC806.04c.1:pep";
I	PomBase	exon	241589	241709	.	-	.	gene_id "SPAC806.04c"; transcript_id "SPAC806.04c.1"; exon_number "3"; gene_name "SPAC806.04c"; gene_source "PomBase"; gene_biotype "protein_coding"; transcript_name "SPAC806.04c.1"; transcript_source "PomBase"; transcript_biotype "protein_coding"; exon_id "SPAC806.04c.1:exon:3";
I	PomBase	CDS	241589	241709	.	-	2	gene_id "SPAC806.04c"; transcript_id "SPAC806.04c.1"; exon_number "3"; gene_name "SPAC806.04c"; gene_source "PomBase"; gene_biotype "protein_coding"; transcript_name "SPAC806.04c.1"; transcript_source "PomBase"; transcript_biotype "protein_coding"; protein_id "SPAC806.04c.1:pep";
I	PomBase	exon	241008	241537	.	-	.	gene_id "SPAC806.04c"; transcript_id "SPAC806.04c.1"; exon_number "4"; gene_name "SPAC806.04c"; gene_source "PomBase"; gene_biotype "protein_coding"; transcript_name "SPAC806.04c.1"; transcript_source "PomBase"; transcript_biotype "protein_coding"; exon_id "SPAC806.04c.1:exon:4";
I	PomBase	CDS	241426	241537	.	-	1	gene_id "SPAC806.04c"; transcript_id "SPAC806.04c.1"; exon_number "4"; gene_name "SPAC806.04c"; gene_source "PomBase"; gene_biotype "protein_coding"; transcript_name "SPAC806.04c.1"; transcript_source "PomBase"; transcript_biotype "protein_coding"; protein_id "SPAC806.04c.1:pep";
I	PomBase	five_prime_utr	242942	243122	.	-	.	gene_id "SPAC806.04c"; transcript_id "SPAC806.04c.1"; gene_name "SPAC806.04c"; gene_source "PomBase"; gene_biotype "protein_coding"; transcript_name "SPAC806.04c.1"; transcript_source "PomBase"; transcript_biotype "protein_coding";
I	PomBase	three_prime_utr	241008	241425	.	-	.	gene_id "SPAC806.04c"; transcript_id "SPAC806.04c.1"; gene_name "SPAC806.04c"; gene_source "PomBase"; gene_biotype "protein_coding"; transcript_name "SPAC806.04c.1"; transcript_source "PomBase"; transcript_biotype "protein_coding";
I	PomBase	gene	244206	247074	.	-	.	gene_id "SPAC806.06c"; gene_name "SPAC806.06c"; gene_source "PomBase"; gene_biotype "protein_coding";
I	PomBase	transcript	244206	247074	.	-	.	gene_id "SPAC806.06c"; transcript_id "SPAC806.06c.1"; gene_name "SPAC806.06c"; gene_source "PomBase"; gene_biotype "protein_coding"; transcript_name "SPAC806.06c.1"; transcript_source "PomBase"; transcript_biotype "protein_coding";
I	PomBase	exon	244206	247074	.	-	.	gene_id "SPAC806.06c"; transcript_id "SPAC806.06c.1"; exon_number "1"; gene_name "SPAC806.06c"; gene_source "PomBase"; gene_biotype "protein_coding"; transcript_name "SPAC806.06c.1"; transcript_source "PomBase"; transcript_biotype "protein_coding"; exon_id "SPAC806.06c.1:exon:1";
I	PomBase	CDS	245307	246410	.	-	0	gene_id "SPAC806.06c"; transcript_id "SPAC806.06c.1"; exon_number "1"; gene_name "SPAC806.06c"; gene_source "PomBase"; gene_biotype "protein_coding"; transcript_name "SPAC806.06c.1"; transcript_source "PomBase"; transcript_biotype "protein_coding"; protein_id "SPAC806.06c.1:pep";
I	PomBase	start_codon	246408	246410	.	-	0	gene_id "SPAC806.06c"; transcript_id "SPAC806.06c.1"; exon_number "1"; gene_name "SPAC806.06c"; gene_source "PomBase"; gene_biotype "protein_coding"; transcript_name "SPAC806.06c.1"; transcript_source "PomBase"; transcript_biotype "protein_coding";
I	PomBase	stop_codon	245304	245306	.	-	0	gene_id "SPAC806.06c"; transcript_id "SPAC806.06c.1"; exon_number "1"; gene_name "SPAC806.06c"; gene_source "PomBase"; gene_biotype "protein_coding"; transcript_name "SPAC806.06c.1"; transcript_source "PomBase"; transcript_biotype "protein_coding";
I	PomBase	five_prime_utr	246411	247074	.	-	.	gene_id "SPAC806.06c"; transcript_id "SPAC806.06c.1"; gene_name "SPAC806.06c"; gene_source "PomBase"; gene_biotype "protein_coding"; transcript_name "SPAC806.06c.1"; transcript_source "PomBase"; transcript_biotype "protein_coding";
I	PomBase	three_prime_utr	244206	245303	.	-	.	gene_id "SPAC806.06c"; transcript_id "SPAC806.06c.1"; gene_name "SPAC806.06c"; gene_source "PomBase"; gene_biotype "protein_coding"; transcript_name "SPAC806.06c.1"; transcript_source "PomBase"; transcript_biotype "protein_coding";
I	PomBase	gene	244214	247574	.	+	.	gene_id "SPAC806.05"; gene_name "SPAC806.05"; gene_source "PomBase"; gene_biotype "protein_coding";
I	PomBase	transcript	244214	247574	.	+	.	gene_id "SPAC806.05"; transcript_id "SPAC806.05.1"; gene_name "SPAC806.05"; gene_source "PomBase"; gene_biotype "protein_coding"; transcript_name "SPAC806.05.1"; transcript_source "PomBase"; transcript_biotype "protein_coding";
I	PomBase	exon	244214	247438	.	+	.	gene_id "SPAC806.05"; transcript_id "SPAC806.05.1"; exon_number "1"; gene_name "SPAC806.05"; gene_source "PomBase"; gene_biotype "protein_coding"; transcript_name "SPAC806.05.1"; transcript_source "PomBase"; transcript_biotype "protein_coding"; exon_id "SPAC806.05.1:exon:1";
I	PomBase	CDS	244731	245108	.	+	0	gene_id "SPAC806.05"; transcript_id "SPAC806.05.1"; exon_number "1"; gene_name "SPAC806.05"; gene_source "PomBase"; gene_biotype "protein_coding"; transcript_name "SPAC806.05.1"; transcript_source "PomBase"; transcript_biotype "protein_coding"; protein_id "SPAC806.05.1:pep";
I	PomBase	start_codon	244731	244733	.	+	0	gene_id "SPAC806.05"; transcript_id "SPAC806.05.1"; exon_number "1"; gene_name "SPAC806.05"; gene_source "PomBase"; gene_biotype "protein_coding"; transcript_name "SPAC806.05.1"; transcript_source "PomBase"; transcript_biotype "protein_coding";
I	PomBase	exon	247491	247574	.	+	.	gene_id "SPAC806.05"; transcript_id "SPAC806.05.1"; exon_number "2"; gene_name "SPAC806.05"; gene_source "PomBase"; gene_biotype "protein_coding"; transcript_name "SPAC806.05.1"; transcript_source "PomBase"; transcript_biotype "protein_coding"; exon_id "SPAC806.05.1:three_prime_UTR:2";
I	PomBase	five_prime_utr	244214	244730	.	+	.	gene_id "SPAC806.05"; transcript_id "SPAC806.05.1"; gene_name "SPAC806.05"; gene_source "PomBase"; gene_biotype "protein_coding"; transcript_name "SPAC806.05.1"; transcript_source "PomBase"; transcript_biotype "protein_coding";
I	PomBase	three_prime_utr	245109	247438	.	+	.	gene_id "SPAC806.05"; transcript_id "SPAC806.05.1"; gene_name "SPAC806.05"; gene_source "PomBase"; gene_biotype "protein_coding"; transcript_name "SPAC806.05.1"; transcript_source "PomBase"; transcript_biotype "protein_coding";
I	PomBase	three_prime_utr	247491	247574	.	+	.	gene_id "SPAC806.05"; transcript_id "SPAC806.05.1"; gene_name "SPAC806.05"; gene_source "PomBase"; gene_biotype "protein_coding"; transcript_name "SPAC806.05.1"; transcript_source "PomBase"; transcript_biotype "protein_coding";
I	PomBase	gene	247720	248448	.	-	.	gene_id "SPNCRNA.629"; gene_name "ndk1-antisense-1"; gene_source "PomBase"; gene_biotype "ncRNA";
I	PomBase	transcript	247720	248448	.	-	.	gene_id "SPNCRNA.629"; transcript_id "SPNCRNA.629.1"; gene_name "ndk1-antisense-1"; gene_source "PomBase"; gene_biotype "ncRNA"; transcript_name "ndk1-antisense-1"; transcript_source "PomBase"; transcript_biotype "ncRNA";
I	PomBase	exon	247720	248448	.	-	.	gene_id "SPNCRNA.629"; transcript_id "SPNCRNA.629.1"; exon_number "1"; gene_name "ndk1-antisense-1"; gene_source "PomBase"; gene_biotype "ncRNA"; transcript_name "ndk1-antisense-1"; transcript_source "PomBase"; transcript_biotype "ncRNA"; exon_id "SPNCRNA.629.1:exon:1";
I	PomBase	gene	247821	248560	.	+	.	gene_id "SPAC806.07"; gene_name "ndk1"; gene_source "PomBase"; gene_biotype "protein_coding";
I	PomBase	transcript	247821	248560	.	+	.	gene_id "SPAC806.07"; transcript_id "SPAC806.07.1"; gene_name "ndk1"; gene_source "PomBase"; gene_biotype "protein_coding"; transcript_name "ndk1"; transcript_source "PomBase"; transcript_biotype "protein_coding";
I	PomBase	exon	247821	248560	.	+	.	gene_id "SPAC806.07"; transcript_id "SPAC806.07.1"; exon_number "1"; gene_name "ndk1"; gene_source "PomBase"; gene_biotype "protein_coding"; transcript_name "ndk1"; transcript_source "PomBase"; transcript_biotype "protein_coding"; exon_id "SPAC806.07.1:exon:1";
I	PomBase	CDS	247928	248380	.	+	0	gene_id "SPAC806.07"; transcript_id "SPAC806.07.1"; exon_number "1"; gene_name "ndk1"; gene_source "PomBase"; gene_biotype "protein_coding"; transcript_name "ndk1"; transcript_source "PomBase"; transcript_biotype "protein_coding"; protein_id "SPAC806.07.1:pep";
I	PomBase	start_codon	247928	247930	.	+	0	gene_id "SPAC806.07"; transcript_id "SPAC806.07.1"; exon_number "1"; gene_name "ndk1"; gene_source "PomBase"; gene_biotype "protein_coding"; transcript_name "ndk1"; transcript_source "PomBase"; transcript_biotype "protein_coding";
I	PomBase	stop_codon	248381	248383	.	+	0	gene_id "SPAC806.07"; transcript_id "SPAC806.07.1"; exon_number "1"; gene_name "ndk1"; gene_source "PomBase"; gene_biotype "protein_coding"; transcript_name "ndk1"; transcript_source "PomBase"; transcript_biotype "protein_coding";
I	PomBase	five_prime_utr	247821	247927	.	+	.	gene_id "SPAC806.07"; transcript_id "SPAC806.07.1"; gene_name "ndk1"; gene_source "PomBase"; gene_biotype "protein_coding"; transcript_name "ndk1"; transcript_source "PomBase"; transcript_biotype "protein_coding";
I	PomBase	three_prime_utr	248384	248560	.	+	.	gene_id "SPAC806.07"; transcript_id "SPAC806.07.1"; gene_name "ndk1"; gene_source "PomBase"; gene_biotype "protein_coding"; transcript_name "ndk1"; transcript_source "PomBase"; transcript_biotype "protein_coding";
I	PomBase	gene	248579	250983	.	-	.	gene_id "SPAC806.08c"; gene_name "mod21"; gene_source "PomBase"; gene_biotype "protein_coding";
I	PomBase	transcript	248579	250983	.	-	.	gene_id "SPAC806.08c"; transcript_id "SPAC806.08c.1"; gene_name "mod21"; gene_source "PomBase"; gene_biotype "protein_coding"; transcript_name "mod21"; transcript_source "PomBase"; transcript_biotype "protein_coding";
I	PomBase	exon	250607	250983	.	-	.	gene_id "SPAC806.08c"; transcript_id "SPAC806.08c.1"; exon_number "1"; gene_name "mod21"; gene_source "PomBase"; gene_biotype "protein_coding"; transcript_name "mod21"; transcript_source "PomBase"; transcript_biotype "protein_coding"; exon_id "SPAC806.08c.1:exon:1";
I	PomBase	CDS	250607	250770	.	-	0	gene_id "SPAC806.08c"; transcript_id "SPAC806.08c.1"; exon_number "1"; gene_name "mod21"; gene_source "PomBase"; gene_biotype "protein_coding"; transcript_name "mod21"; transcript_source "PomBase"; transcript_biotype "protein_coding"; protein_id "SPAC806.08c.1:pep";
I	PomBase	start_codon	250768	250770	.	-	0	gene_id "SPAC806.08c"; transcript_id "SPAC806.08c.1"; exon_number "1"; gene_name "mod21"; gene_source "PomBase"; gene_biotype "protein_coding"; transcript_name "mod21"; transcript_source "PomBase"; transcript_biotype "protein_coding";
I	PomBase	exon	248579	250549	.	-	.	gene_id "SPAC806.08c"; transcript_id "SPAC806.08c.1"; exon_number "2"; gene_name "mod21"; gene_source "PomBase"; gene_biotype "protein_coding"; transcript_name "mod21"; transcript_source "PomBase"; transcript_biotype "protein_coding"; exon_id "SPAC806.08c.1:exon:2";
I	PomBase	CDS	248680	250549	.	-	1	gene_id "SPAC806.08c"; transcript_id "SPAC806.08c.1"; exon_number "2"; gene_name "mod21"; gene_source "PomBase"; gene_biotype "protein_coding"; transcript_name "mod21"; transcript_source "PomBase"; transcript_biotype "protein_coding"; protein_id "SPAC806.08c.1:pep";
I	PomBase	five_prime_utr	250771	250983	.	-	.	gene_id "SPAC806.08c"; transcript_id "SPAC806.08c.1"; gene_name "mod21"; gene_source "PomBase"; gene_biotype "protein_coding"; transcript_name "mod21"; transcript_source "PomBase"; transcript_biotype "protein_coding";
I	PomBase	three_prime_utr	248579	248679	.	-	.	gene_id "SPAC806.08c"; transcript_id "SPAC806.08c.1"; gene_name "mod21"; gene_source "PomBase"; gene_biotype "protein_coding"; transcript_name "mod21"; transcript_source "PomBase"; transcript_biotype "protein_coding";
I	PomBase	gene	251173	254600	.	-	.	gene_id "SPAC1639.01c"; gene_name "SPAC1639.01c"; gene_source "PomBase"; gene_biotype "protein_coding";
I	PomBase	transcript	251173	254600	.	-	.	gene_id "SPAC1639.01c"; transcript_id "SPAC1639.01c.1"; gene_name "SPAC1639.01c"; gene_source "PomBase"; gene_biotype "protein_coding"; transcript_name "SPAC1639.01c.1"; transcript_source "PomBase"; transcript_biotype "protein_coding";
I	PomBase	exon	253590	254600	.	-	.	gene_id "SPAC1639.01c"; transcript_id "SPAC1639.01c.1"; exon_number "1"; gene_name "SPAC1639.01c"; gene_source "PomBase"; gene_biotype "protein_coding"; transcript_name "SPAC1639.01c.1"; transcript_source "PomBase"; transcript_biotype "protein_coding"; exon_id "SPAC1639.01c.1:exon:1";
I	PomBase	CDS	253590	253714	.	-	0	gene_id "SPAC1639.01c"; transcript_id "SPAC1639.01c.1"; exon_number "1"; gene_name "SPAC1639.01c"; gene_source "PomBase"; gene_biotype "protein_coding"; transcript_name "SPAC1639.01c.1"; transcript_source "PomBase"; transcript_biotype "protein_coding"; protein_id "SPAC1639.01c.1:pep";
I	PomBase	start_codon	253712	253714	.	-	0	gene_id "SPAC1639.01c"; transcript_id "SPAC1639.01c.1"; exon_number "1"; gene_name "SPAC1639.01c"; gene_source "PomBase"; gene_biotype "protein_coding"; transcript_name "SPAC1639.01c.1"; transcript_source "PomBase"; transcript_biotype "protein_coding";
I	PomBase	exon	252392	252752	.	-	.	gene_id "SPAC1639.01c"; transcript_id "SPAC1639.01c.1"; exon_number "2"; gene_name "SPAC1639.01c"; gene_source "PomBase"; gene_biotype "protein_coding"; transcript_name "SPAC1639.01c.1"; transcript_source "PomBase"; transcript_biotype "protein_coding"; exon_id "SPAC1639.01c.1:exon:2";
I	PomBase	CDS	252392	252752	.	-	1	gene_id "SPAC1639.01c"; transcript_id "SPAC1639.01c.1"; exon_number "2"; gene_name "SPAC1639.01c"; gene_source "PomBase"; gene_biotype "protein_coding"; transcript_name "SPAC1639.01c.1"; transcript_source "PomBase"; transcript_biotype "protein_coding"; protein_id "SPAC1639.01c.1:pep";
I	PomBase	exon	251173	252337	.	-	.	gene_id "SPAC1639.01c"; transcript_id "SPAC1639.01c.1"; exon_number "3"; gene_name "SPAC1639.01c"; gene_source "PomBase"; gene_biotype "protein_coding"; transcript_name "SPAC1639.01c.1"; transcript_source "PomBase"; transcript_biotype "protein_coding"; exon_id "SPAC1639.01c.1:exon:3";
I	PomBase	CDS	251729	252337	.	-	0	gene_id "SPAC1639.01c"; transcript_id "SPAC1639.01c.1"; exon_number "3"; gene_name "SPAC1639.01c"; gene_source "PomBase"; gene_biotype "protein_coding"; transcript_name "SPAC1639.01c.1"; transcript_source "PomBase"; transcript_biotype "protein_coding"; protein_id "SPAC1639.01c.1:pep";
I	PomBase	stop_codon	251726	251728	.	-	0	gene_id "SPAC1639.01c"; transcript_id "SPAC1639.01c.1"; exon_number "3"; gene_name "SPAC1639.01c"; gene_source "PomBase"; gene_biotype "protein_coding"; transcript_name "SPAC1639.01c.1"; transcript_source "PomBase"; transcript_biotype "protein_coding";
I	PomBase	five_prime_utr	253715	254600	.	-	.	gene_id "SPAC1639.01c"; transcript_id "SPAC1639.01c.1"; gene_name "SPAC1639.01c"; gene_source "PomBase"; gene_biotype "protein_coding"; transcript_name "SPAC1639.01c.1"; transcript_source "PomBase"; transcript_biotype "protein_coding";
I	PomBase	three_prime_utr	251173	251725	.	-	.	gene_id "SPAC1639.01c"; transcript_id "SPAC1639.01c.1"; gene_name "SPAC1639.01c"; gene_source "PomBase"; gene_biotype "protein_coding"; transcript_name "SPAC1639.01c.1"; transcript_source "PomBase"; transcript_biotype "protein_coding";
I	PomBase	gene	253719	255964	.	+	.	gene_id "SPNCRNA.630"; gene_name "SPNCRNA.630"; gene_source "PomBase"; gene_biotype "ncRNA";
I	PomBase	transcript	253719	255964	.	+	.	gene_id "SPNCRNA.630"; transcript_id "SPNCRNA.630.1"; gene_name "SPNCRNA.630"; gene_source "PomBase"; gene_biotype "ncRNA"; transcript_name "SPNCRNA.630.1"; transcript_source "PomBase"; transcript_biotype "ncRNA";
I	PomBase	exon	253719	255964	.	+	.	gene_id "SPNCRNA.630"; transcript_id "SPNCRNA.630.1"; exon_number "1"; gene_name "SPNCRNA.630"; gene_source "PomBase"; gene_biotype "ncRNA"; transcript_name "SPNCRNA.630.1"; transcript_source "PomBase"; transcript_biotype "ncRNA"; exon_id "SPNCRNA.630.1:exon:1";
I	PomBase	gene	255881	259505	.	-	.	gene_id "SPAC1639.02c"; gene_name "trk2"; gene_source "PomBase"; gene_biotype "protein_coding";
I	PomBase	transcript	255881	259505	.	-	.	gene_id "SPAC1639.02c"; transcript_id "SPAC1639.02c.1"; gene_name "trk2"; gene_source "PomBase"; gene_biotype "protein_coding"; transcript_name "trk2"; transcript_source "PomBase"; transcript_biotype "protein_coding";
I	PomBase	exon	259356	259505	.	-	.	gene_id "SPAC1639.02c"; transcript_id "SPAC1639.02c.1"; exon_number "1"; gene_name "trk2"; gene_source "PomBase"; gene_biotype "protein_coding"; transcript_name "trk2"; transcript_source "PomBase"; transcript_biotype "protein_coding"; exon_id "SPAC1639.02c.1:exon:1";
I	PomBase	CDS	259356	259461	.	-	0	gene_id "SPAC1639.02c"; transcript_id "SPAC1639.02c.1"; exon_number "1"; gene_name "trk2"; gene_source "PomBase"; gene_biotype "protein_coding"; transcript_name "trk2"; transcript_source "PomBase"; transcript_biotype "protein_coding"; protein_id "SPAC1639.02c.1:pep";
I	PomBase	start_codon	259459	259461	.	-	0	gene_id "SPAC1639.02c"; transcript_id "SPAC1639.02c.1"; exon_number "1"; gene_name "trk2"; gene_source "PomBase"; gene_biotype "protein_coding"; transcript_name "trk2"; transcript_source "PomBase"; transcript_biotype "protein_coding";
I	PomBase	exon	259161	259315	.	-	.	gene_id "SPAC1639.02c"; transcript_id "SPAC1639.02c.1"; exon_number "2"; gene_name "trk2"; gene_source "PomBase"; gene_biotype "protein_coding"; transcript_name "trk2"; transcript_source "PomBase"; transcript_biotype "protein_coding"; exon_id "SPAC1639.02c.1:exon:2";
I	PomBase	CDS	259161	259315	.	-	2	gene_id "SPAC1639.02c"; transcript_id "SPAC1639.02c.1"; exon_number "2"; gene_name "trk2"; gene_source "PomBase"; gene_biotype "protein_coding"; transcript_name "trk2"; transcript_source "PomBase"; transcript_biotype "protein_coding"; protein_id "SPAC1639.02c.1:pep";
I	PomBase	exon	258220	259120	.	-	.	gene_id "SPAC1639.02c"; transcript_id "SPAC1639.02c.1"; exon_number "3"; gene_name "trk2"; gene_source "PomBase"; gene_biotype "protein_coding"; transcript_name "trk2"; transcript_source "PomBase"; transcript_biotype "protein_coding"; exon_id "SPAC1639.02c.1:exon:3";
I	PomBase	CDS	258220	259120	.	-	0	gene_id "SPAC1639.02c"; transcript_id "SPAC1639.02c.1"; exon_number "3"; gene_name "trk2"; gene_source "PomBase"; gene_biotype "protein_coding"; transcript_name "trk2"; transcript_source "PomBase"; transcript_biotype "protein_coding"; protein_id "SPAC1639.02c.1:pep";
I	PomBase	exon	257229	258184	.	-	.	gene_id "SPAC1639.02c"; transcript_id "SPAC1639.02c.1"; exon_number "4"; gene_name "trk2"; gene_source "PomBase"; gene_biotype "protein_coding"; transcript_name "trk2"; transcript_source "PomBase"; transcript_biotype "protein_coding"; exon_id "SPAC1639.02c.1:exon:4";
I	PomBase	CDS	257229	258184	.	-	2	gene_id "SPAC1639.02c"; transcript_id "SPAC1639.02c.1"; exon_number "4"; gene_name "trk2"; gene_source "PomBase"; gene_biotype "protein_coding"; transcript_name "trk2"; transcript_source "PomBase"; transcript_biotype "protein_coding"; protein_id "SPAC1639.02c.1:pep";
I	PomBase	exon	257179	257181	.	-	.	gene_id "SPAC1639.02c"; transcript_id "SPAC1639.02c.1"; exon_number "5"; gene_name "trk2"; gene_source "PomBase"; gene_biotype "protein_coding"; transcript_name "trk2"; transcript_source "PomBase"; transcript_biotype "protein_coding"; exon_id "SPAC1639.02c.1:exon:5";
I	PomBase	CDS	257179	257181	.	-	0	gene_id "SPAC1639.02c"; transcript_id "SPAC1639.02c.1"; exon_number "5"; gene_name "trk2"; gene_source "PomBase"; gene_biotype "protein_coding"; transcript_name "trk2"; transcript_source "PomBase"; transcript_biotype "protein_coding"; protein_id "SPAC1639.02c.1:pep";
I	PomBase	exon	257116	257135	.	-	.	gene_id "SPAC1639.02c"; transcript_id "SPAC1639.02c.1"; exon_number "6"; gene_name "trk2"; gene_source "PomBase"; gene_biotype "protein_coding"; transcript_name "trk2"; transcript_source "PomBase"; transcript_biotype "protein_coding"; exon_id "SPAC1639.02c.1:exon:6";
I	PomBase	CDS	257116	257135	.	-	0	gene_id "SPAC1639.02c"; transcript_id "SPAC1639.02c.1"; exon_number "6"; gene_name "trk2"; gene_source "PomBase"; gene_biotype "protein_coding"; transcript_name "trk2"; transcript_source "PomBase"; transcript_biotype "protein_coding"; protein_id "SPAC1639.02c.1:pep";
I	PomBase	exon	257055	257070	.	-	.	gene_id "SPAC1639.02c"; transcript_id "SPAC1639.02c.1"; exon_number "7"; gene_name "trk2"; gene_source "PomBase"; gene_biotype "protein_coding"; transcript_name "trk2"; transcript_source "PomBase"; transcript_biotype "protein_coding"; exon_id "SPAC1639.02c.1:exon:7";
I	PomBase	CDS	257055	257070	.	-	1	gene_id "SPAC1639.02c"; transcript_id "SPAC1639.02c.1"; exon_number "7"; gene_name "trk2"; gene_source "PomBase"; gene_biotype "protein_coding"; transcript_name "trk2"; transcript_source "PomBase"; transcript_biotype "protein_coding"; protein_id "SPAC1639.02c.1:pep";
I	PomBase	exon	256797	257009	.	-	.	gene_id "SPAC1639.02c"; transcript_id "SPAC1639.02c.1"; exon_number "8"; gene_name "trk2"; gene_source "PomBase"; gene_biotype "protein_coding"; transcript_name "trk2"; transcript_source "PomBase"; transcript_biotype "protein_coding"; exon_id "SPAC1639.02c.1:exon:8";
I	PomBase	CDS	256797	257009	.	-	0	gene_id "SPAC1639.02c"; transcript_id "SPAC1639.02c.1"; exon_number "8"; gene_name "trk2"; gene_source "PomBase"; gene_biotype "protein_coding"; transcript_name "trk2"; transcript_source "PomBase"; transcript_biotype "protein_coding"; protein_id "SPAC1639.02c.1:pep";
I	PomBase	exon	256684	256750	.	-	.	gene_id "SPAC1639.02c"; transcript_id "SPAC1639.02c.1"; exon_number "9"; gene_name "trk2"; gene_source "PomBase"; gene_biotype "protein_coding"; transcript_name "trk2"; transcript_source "PomBase"; transcript_biotype "protein_coding"; exon_id "SPAC1639.02c.1:exon:9";
I	PomBase	CDS	256684	256750	.	-	0	gene_id "SPAC1639.02c"; transcript_id "SPAC1639.02c.1"; exon_number "9"; gene_name "trk2"; gene_source "PomBase"; gene_biotype "protein_coding"; transcript_name "trk2"; transcript_source "PomBase"; transcript_biotype "protein_coding"; protein_id "SPAC1639.02c.1:pep";
I	PomBase	exon	256542	256612	.	-	.	gene_id "SPAC1639.02c"; transcript_id "SPAC1639.02c.1"; exon_number "10"; gene_name "trk2"; gene_source "PomBase"; gene_biotype "protein_coding"; transcript_name "trk2"; transcript_source "PomBase"; transcript_biotype "protein_coding"; exon_id "SPAC1639.02c.1:exon:10";
I	PomBase	CDS	256542	256612	.	-	2	gene_id "SPAC1639.02c"; transcript_id "SPAC1639.02c.1"; exon_number "10"; gene_name "trk2"; gene_source "PomBase"; gene_biotype "protein_coding"; transcript_name "trk2"; transcript_source "PomBase"; transcript_biotype "protein_coding"; protein_id "SPAC1639.02c.1:pep";
I	PomBase	exon	256427	256445	.	-	.	gene_id "SPAC1639.02c"; transcript_id "SPAC1639.02c.1"; exon_number "11"; gene_name "trk2"; gene_source "PomBase"; gene_biotype "protein_coding"; transcript_name "trk2"; transcript_source "PomBase"; transcript_biotype "protein_coding"; exon_id "SPAC1639.02c.1:exon:11";
I	PomBase	CDS	256427	256445	.	-	0	gene_id "SPAC1639.02c"; transcript_id "SPAC1639.02c.1"; exon_number "11"; gene_name "trk2"; gene_source "PomBase"; gene_biotype "protein_coding"; transcript_name "trk2"; transcript_source "PomBase"; transcript_biotype "protein_coding"; protein_id "SPAC1639.02c.1:pep";
I	PomBase	exon	256345	256370	.	-	.	gene_id "SPAC1639.02c"; transcript_id "SPAC1639.02c.1"; exon_number "12"; gene_name "trk2"; gene_source "PomBase"; gene_biotype "protein_coding"; transcript_name "trk2"; transcript_source "PomBase"; transcript_biotype "protein_coding"; exon_id "SPAC1639.02c.1:exon:12";
I	PomBase	CDS	256345	256370	.	-	2	gene_id "SPAC1639.02c"; transcript_id "SPAC1639.02c.1"; exon_number "12"; gene_name "trk2"; gene_source "PomBase"; gene_biotype "protein_coding"; transcript_name "trk2"; transcript_source "PomBase"; transcript_biotype "protein_coding"; protein_id "SPAC1639.02c.1:pep";
I	PomBase	exon	255881	256134	.	-	.	gene_id "SPAC1639.02c"; transcript_id "SPAC1639.02c.1"; exon_number "13"; gene_name "trk2"; gene_source "PomBase"; gene_biotype "protein_coding"; transcript_name "trk2"; transcript_source "PomBase"; transcript_biotype "protein_coding"; exon_id "SPAC1639.02c.1:exon:13";
I	PomBase	CDS	256033	256134	.	-	0	gene_id "SPAC1639.02c"; transcript_id "SPAC1639.02c.1"; exon_number "13"; gene_name "trk2"; gene_source "PomBase"; gene_biotype "protein_coding"; transcript_name "trk2"; transcript_source "PomBase"; transcript_biotype "protein_coding"; protein_id "SPAC1639.02c.1:pep";
I	PomBase	stop_codon	256030	256032	.	-	0	gene_id "SPAC1639.02c"; transcript_id "SPAC1639.02c.1"; exon_number "13"; gene_name "trk2"; gene_source "PomBase"; gene_biotype "protein_coding"; transcript_name "trk2"; transcript_source "PomBase"; transcript_biotype "protein_coding";
I	PomBase	five_prime_utr	259462	259505	.	-	.	gene_id "SPAC1639.02c"; transcript_id "SPAC1639.02c.1"; gene_name "trk2"; gene_source "PomBase"; gene_biotype "protein_coding"; transcript_name "trk2"; transcript_source "PomBase"; transcript_biotype "protein_coding";
I	PomBase	three_prime_utr	255881	256029	.	-	.	gene_id "SPAC1639.02c"; transcript_id "SPAC1639.02c.1"; gene_name "trk2"; gene_source "PomBase"; gene_biotype "protein_coding"; transcript_name "trk2"; transcript_source "PomBase"; transcript_biotype "protein_coding";
I	PomBase	gene	256086	257001	.	+	.	gene_id "SPNCRNA.631"; gene_name "trk2-antisense-1"; gene_source "PomBase"; gene_biotype "ncRNA";
I	PomBase	transcript	256086	257001	.	+	.	gene_id "SPNCRNA.631"; transcript_id "SPNCRNA.631.1"; gene_name "trk2-antisense-1"; gene_source "PomBase"; gene_biotype "ncRNA"; transcript_name "trk2-antisense-1"; transcript_source "PomBase"; transcript_biotype "ncRNA";
I	PomBase	exon	256086	257001	.	+	.	gene_id "SPNCRNA.631"; transcript_id "SPNCRNA.631.1"; exon_number "1"; gene_name "trk2-antisense-1"; gene_source "PomBase"; gene_biotype "ncRNA"; transcript_name "trk2-antisense-1"; transcript_source "PomBase"; transcript_biotype "ncRNA"; exon_id "SPNCRNA.631.1:exon:1";
I	PomBase	gene	259603	271053	.	+	.	gene_id "SPAC1F5.11c"; gene_name "tra2"; gene_source "PomBase"; gene_biotype "protein_coding";
I	PomBase	transcript	259603	271053	.	+	.	gene_id "SPAC1F5.11c"; transcript_id "SPAC1F5.11c.1"; gene_name "tra2"; gene_source "PomBase"; gene_biotype "protein_coding"; transcript_name "tra2"; transcript_source "PomBase"; transcript_biotype "protein_coding";
I	PomBase	exon	259603	259782	.	+	.	gene_id "SPAC1F5.11c"; transcript_id "SPAC1F5.11c.1"; exon_number "1"; gene_name "tra2"; gene_source "PomBase"; gene_biotype "protein_coding"; transcript_name "tra2"; transcript_source "PomBase"; transcript_biotype "protein_coding"; exon_id "SPAC1F5.11c.1:exon:1";
I	PomBase	CDS	259719	259782	.	+	0	gene_id "SPAC1F5.11c"; transcript_id "SPAC1F5.11c.1"; exon_number "1"; gene_name "tra2"; gene_source "PomBase"; gene_biotype "protein_coding"; transcript_name "tra2"; transcript_source "PomBase"; transcript_biotype "protein_coding"; protein_id "SPAC1F5.11c.1:pep";
I	PomBase	start_codon	259719	259721	.	+	0	gene_id "SPAC1F5.11c"; transcript_id "SPAC1F5.11c.1"; exon_number "1"; gene_name "tra2"; gene_source "PomBase"; gene_biotype "protein_coding"; transcript_name "tra2"; transcript_source "PomBase"; transcript_biotype "protein_coding";
I	PomBase	exon	259844	271053	.	+	.	gene_id "SPAC1F5.11c"; transcript_id "SPAC1F5.11c.1"; exon_number "2"; gene_name "tra2"; gene_source "PomBase"; gene_biotype "protein_coding"; transcript_name "tra2"; transcript_source "PomBase"; transcript_biotype "protein_coding"; exon_id "SPAC1F5.11c.1:exon:2";
I	PomBase	CDS	259844	270747	.	+	2	gene_id "SPAC1F5.11c"; transcript_id "SPAC1F5.11c.1"; exon_number "2"; gene_name "tra2"; gene_source "PomBase"; gene_biotype "protein_coding"; transcript_name "tra2"; transcript_source "PomBase"; transcript_biotype "protein_coding"; protein_id "SPAC1F5.11c.1:pep";
I	PomBase	five_prime_utr	259603	259718	.	+	.	gene_id "SPAC1F5.11c"; transcript_id "SPAC1F5.11c.1"; gene_name "tra2"; gene_source "PomBase"; gene_biotype "protein_coding"; transcript_name "tra2"; transcript_source "PomBase"; transcript_biotype "protein_coding";
I	PomBase	three_prime_utr	270748	271053	.	+	.	gene_id "SPAC1F5.11c"; transcript_id "SPAC1F5.11c.1"; gene_name "tra2"; gene_source "PomBase"; gene_biotype "protein_coding"; transcript_name "tra2"; transcript_source "PomBase"; transcript_biotype "protein_coding";
I	PomBase	gene	266551	267792	.	-	.	gene_id "SPNCRNA.632"; gene_name "tra2-antisense-1"; gene_source "PomBase"; gene_biotype "ncRNA";
I	PomBase	transcript	266551	267792	.	-	.	gene_id "SPNCRNA.632"; transcript_id "SPNCRNA.632.1"; gene_name "tra2-antisense-1"; gene_source "PomBase"; gene_biotype "ncRNA"; transcript_name "tra2-antisense-1"; transcript_source "PomBase"; transcript_biotype "ncRNA";
I	PomBase	exon	266551	267792	.	-	.	gene_id "SPNCRNA.632"; transcript_id "SPNCRNA.632.1"; exon_number "1"; gene_name "tra2-antisense-1"; gene_source "PomBase"; gene_biotype "ncRNA"; transcript_name "tra2-antisense-1"; transcript_source "PomBase"; transcript_biotype "ncRNA"; exon_id "SPNCRNA.632.1:exon:1";
I	PomBase	gene	270893	272610	.	-	.	gene_id "SPAC1F5.10"; gene_name "SPAC1F5.10"; gene_source "PomBase"; gene_biotype "protein_coding";
I	PomBase	transcript	270893	272610	.	-	.	gene_id "SPAC1F5.10"; transcript_id "SPAC1F5.10.1"; gene_name "SPAC1F5.10"; gene_source "PomBase"; gene_biotype "protein_coding"; transcript_name "SPAC1F5.10.1"; transcript_source "PomBase"; transcript_biotype "protein_coding";
I	PomBase	exon	272257	272610	.	-	.	gene_id "SPAC1F5.10"; transcript_id "SPAC1F5.10.1"; exon_number "1"; gene_name "SPAC1F5.10"; gene_source "PomBase"; gene_biotype "protein_coding"; transcript_name "SPAC1F5.10.1"; transcript_source "PomBase"; transcript_biotype "protein_coding"; exon_id "SPAC1F5.10.1:exon:1";
I	PomBase	CDS	272257	272323	.	-	0	gene_id "SPAC1F5.10"; transcript_id "SPAC1F5.10.1"; exon_number "1"; gene_name "SPAC1F5.10"; gene_source "PomBase"; gene_biotype "protein_coding"; transcript_name "SPAC1F5.10.1"; transcript_source "PomBase"; transcript_biotype "protein_coding"; protein_id "SPAC1F5.10.1:pep";
I	PomBase	start_codon	272321	272323	.	-	0	gene_id "SPAC1F5.10"; transcript_id "SPAC1F5.10.1"; exon_number "1"; gene_name "SPAC1F5.10"; gene_source "PomBase"; gene_biotype "protein_coding"; transcript_name "SPAC1F5.10.1"; transcript_source "PomBase"; transcript_biotype "protein_coding";
I	PomBase	exon	272170	272190	.	-	.	gene_id "SPAC1F5.10"; transcript_id "SPAC1F5.10.1"; exon_number "2"; gene_name "SPAC1F5.10"; gene_source "PomBase"; gene_biotype "protein_coding"; transcript_name "SPAC1F5.10.1"; transcript_source "PomBase"; transcript_biotype "protein_coding"; exon_id "SPAC1F5.10.1:exon:2";
I	PomBase	CDS	272170	272190	.	-	2	gene_id "SPAC1F5.10"; transcript_id "SPAC1F5.10.1"; exon_number "2"; gene_name "SPAC1F5.10"; gene_source "PomBase"; gene_biotype "protein_coding"; transcript_name "SPAC1F5.10.1"; transcript_source "PomBase"; transcript_biotype "protein_coding"; protein_id "SPAC1F5.10.1:pep";
I	PomBase	exon	270893	272116	.	-	.	gene_id "SPAC1F5.10"; transcript_id "SPAC1F5.10.1"; exon_number "3"; gene_name "SPAC1F5.10"; gene_source "PomBase"; gene_biotype "protein_coding"; transcript_name "SPAC1F5.10.1"; transcript_source "PomBase"; transcript_biotype "protein_coding"; exon_id "SPAC1F5.10.1:exon:3";
I	PomBase	CDS	271020	272116	.	-	2	gene_id "SPAC1F5.10"; transcript_id "SPAC1F5.10.1"; exon_number "3"; gene_name "SPAC1F5.10"; gene_source "PomBase"; gene_biotype "protein_coding"; transcript_name "SPAC1F5.10.1"; transcript_source "PomBase"; transcript_biotype "protein_coding"; protein_id "SPAC1F5.10.1:pep";
I	PomBase	five_prime_utr	272324	272610	.	-	.	gene_id "SPAC1F5.10"; transcript_id "SPAC1F5.10.1"; gene_name "SPAC1F5.10"; gene_source "PomBase"; gene_biotype "protein_coding"; transcript_name "SPAC1F5.10.1"; transcript_source "PomBase"; transcript_biotype "protein_coding";
I	PomBase	three_prime_utr	270893	271019	.	-	.	gene_id "SPAC1F5.10"; transcript_id "SPAC1F5.10.1"; gene_name "SPAC1F5.10"; gene_source "PomBase"; gene_biotype "protein_coding"; transcript_name "SPAC1F5.10.1"; transcript_source "PomBase"; transcript_biotype "protein_coding";
I	PomBase	gene	271077	272457	.	+	.	gene_id "SPNCRNA.633"; gene_name "fal1-antisense-1"; gene_source "PomBase"; gene_biotype "ncRNA";
I	PomBase	transcript	271077	272457	.	+	.	gene_id "SPNCRNA.633"; transcript_id "SPNCRNA.633.1"; gene_name "fal1-antisense-1"; gene_source "PomBase"; gene_biotype "ncRNA"; transcript_name "fal1-antisense-1"; transcript_source "PomBase"; transcript_biotype "ncRNA";
I	PomBase	exon	271077	272457	.	+	.	gene_id "SPNCRNA.633"; transcript_id "SPNCRNA.633.1"; exon_number "1"; gene_name "fal1-antisense-1"; gene_source "PomBase"; gene_biotype "ncRNA"; transcript_name "fal1-antisense-1"; transcript_source "PomBase"; transcript_biotype "ncRNA"; exon_id "SPNCRNA.633.1:exon:1";
I	PomBase	gene	272539	274901	.	-	.	gene_id "SPNCRNA.634"; gene_name "shk2-antisense-1"; gene_source "PomBase"; gene_biotype "ncRNA";
I	PomBase	transcript	272539	274901	.	-	.	gene_id "SPNCRNA.634"; transcript_id "SPNCRNA.634.1"; gene_name "shk2-antisense-1"; gene_source "PomBase"; gene_biotype "ncRNA"; transcript_name "shk2-antisense-1"; transcript_source "PomBase"; transcript_biotype "ncRNA";
I	PomBase	exon	272539	274901	.	-	.	gene_id "SPNCRNA.634"; transcript_id "SPNCRNA.634.1"; exon_number "1"; gene_name "shk2-antisense-1"; gene_source "PomBase"; gene_biotype "ncRNA"; transcript_name "shk2-antisense-1"; transcript_source "PomBase"; transcript_biotype "ncRNA"; exon_id "SPNCRNA.634.1:exon:1";
I	PomBase	gene	273152	274921	.	+	.	gene_id "SPAC1F5.09c"; gene_name "shk2"; gene_source "PomBase"; gene_biotype "protein_coding";
I	PomBase	transcript	273152	274921	.	+	.	gene_id "SPAC1F5.09c"; transcript_id "SPAC1F5.09c.1"; gene_name "shk2"; gene_source "PomBase"; gene_biotype "protein_coding"; transcript_name "shk2"; transcript_source "PomBase"; transcript_biotype "protein_coding";
I	PomBase	exon	273152	274921	.	+	.	gene_id "SPAC1F5.09c"; transcript_id "SPAC1F5.09c.1"; exon_number "1"; gene_name "shk2"; gene_source "PomBase"; gene_biotype "protein_coding"; transcript_name "shk2"; transcript_source "PomBase"; transcript_biotype "protein_coding"; exon_id "SPAC1F5.09c.1:exon:1";
I	PomBase	CDS	273152	274918	.	+	0	gene_id "SPAC1F5.09c"; transcript_id "SPAC1F5.09c.1"; exon_number "1"; gene_name "shk2"; gene_source "PomBase"; gene_biotype "protein_coding"; transcript_name "shk2"; transcript_source "PomBase"; transcript_biotype "protein_coding"; protein_id "SPAC1F5.09c.1:pep";
I	PomBase	start_codon	273152	273154	.	+	0	gene_id "SPAC1F5.09c"; transcript_id "SPAC1F5.09c.1"; exon_number "1"; gene_name "shk2"; gene_source "PomBase"; gene_biotype "protein_coding"; transcript_name "shk2"; transcript_source "PomBase"; transcript_biotype "protein_coding";
I	PomBase	stop_codon	274919	274921	.	+	0	gene_id "SPAC1F5.09c"; transcript_id "SPAC1F5.09c.1"; exon_number "1"; gene_name "shk2"; gene_source "PomBase"; gene_biotype "protein_coding"; transcript_name "shk2"; transcript_source "PomBase"; transcript_biotype "protein_coding";
I	PomBase	gene	275089	276661	.	+	.	gene_id "SPAC1F5.08c"; gene_name "yam8"; gene_source "PomBase"; gene_biotype "protein_coding";
I	PomBase	transcript	275089	276661	.	+	.	gene_id "SPAC1F5.08c"; transcript_id "SPAC1F5.08c.1"; gene_name "yam8"; gene_source "PomBase"; gene_biotype "protein_coding"; transcript_name "yam8"; transcript_source "PomBase"; transcript_biotype "protein_coding";
I	PomBase	exon	275089	276661	.	+	.	gene_id "SPAC1F5.08c"; transcript_id "SPAC1F5.08c.1"; exon_number "1"; gene_name "yam8"; gene_source "PomBase"; gene_biotype "protein_coding"; transcript_name "yam8"; transcript_source "PomBase"; transcript_biotype "protein_coding"; exon_id "SPAC1F5.08c.1:exon:1";
I	PomBase	CDS	275089	276549	.	+	0	gene_id "SPAC1F5.08c"; transcript_id "SPAC1F5.08c.1"; exon_number "1"; gene_name "yam8"; gene_source "PomBase"; gene_biotype "protein_coding"; transcript_name "yam8"; transcript_source "PomBase"; transcript_biotype "protein_coding"; protein_id "SPAC1F5.08c.1:pep";
I	PomBase	start_codon	275089	275091	.	+	0	gene_id "SPAC1F5.08c"; transcript_id "SPAC1F5.08c.1"; exon_number "1"; gene_name "yam8"; gene_source "PomBase"; gene_biotype "protein_coding"; transcript_name "yam8"; transcript_source "PomBase"; transcript_biotype "protein_coding";
I	PomBase	three_prime_utr	276550	276661	.	+	.	gene_id "SPAC1F5.08c"; transcript_id "SPAC1F5.08c.1"; gene_name "yam8"; gene_source "PomBase"; gene_biotype "protein_coding"; transcript_name "yam8"; transcript_source "PomBase"; transcript_biotype "protein_coding";
I	PomBase	gene	276657	281347	.	-	.	gene_id "SPAC1F5.06"; gene_name "lsh1"; gene_source "PomBase"; gene_biotype "protein_coding";
I	PomBase	transcript	276657	281347	.	-	.	gene_id "SPAC1F5.06"; transcript_id "SPAC1F5.06.1"; gene_name "lsh1"; gene_source "PomBase"; gene_biotype "protein_coding"; transcript_name "lsh1"; transcript_source "PomBase"; transcript_biotype "protein_coding";
I	PomBase	exon	276657	281347	.	-	.	gene_id "SPAC1F5.06"; transcript_id "SPAC1F5.06.1"; exon_number "1"; gene_name "lsh1"; gene_source "PomBase"; gene_biotype "protein_coding"; transcript_name "lsh1"; transcript_source "PomBase"; transcript_biotype "protein_coding"; exon_id "SPAC1F5.06.1:exon:1";
I	PomBase	CDS	278599	281145	.	-	0	gene_id "SPAC1F5.06"; transcript_id "SPAC1F5.06.1"; exon_number "1"; gene_name "lsh1"; gene_source "PomBase"; gene_biotype "protein_coding"; transcript_name "lsh1"; transcript_source "PomBase"; transcript_biotype "protein_coding"; protein_id "SPAC1F5.06.1:pep";
I	PomBase	start_codon	281143	281145	.	-	0	gene_id "SPAC1F5.06"; transcript_id "SPAC1F5.06.1"; exon_number "1"; gene_name "lsh1"; gene_source "PomBase"; gene_biotype "protein_coding"; transcript_name "lsh1"; transcript_source "PomBase"; transcript_biotype "protein_coding";
I	PomBase	five_prime_utr	281146	281347	.	-	.	gene_id "SPAC1F5.06"; transcript_id "SPAC1F5.06.1"; gene_name "lsh1"; gene_source "PomBase"; gene_biotype "protein_coding"; transcript_name "lsh1"; transcript_source "PomBase"; transcript_biotype "protein_coding";
I	PomBase	three_prime_utr	276657	278598	.	-	.	gene_id "SPAC1F5.06"; transcript_id "SPAC1F5.06.1"; gene_name "lsh1"; gene_source "PomBase"; gene_biotype "protein_coding"; transcript_name "lsh1"; transcript_source "PomBase"; transcript_biotype "protein_coding";
I	PomBase	gene	276723	278573	.	+	.	gene_id "SPAC1F5.07c"; gene_name "hem14"; gene_source "PomBase"; gene_biotype "protein_coding";
I	PomBase	transcript	276723	278573	.	+	.	gene_id "SPAC1F5.07c"; transcript_id "SPAC1F5.07c.1"; gene_name "hem14"; gene_source "PomBase"; gene_biotype "protein_coding"; transcript_name "hem14"; transcript_source "PomBase"; transcript_biotype "protein_coding";
I	PomBase	exon	276723	278573	.	+	.	gene_id "SPAC1F5.07c"; transcript_id "SPAC1F5.07c.1"; exon_number "1"; gene_name "hem14"; gene_source "PomBase"; gene_biotype "protein_coding"; transcript_name "hem14"; transcript_source "PomBase"; transcript_biotype "protein_coding"; exon_id "SPAC1F5.07c.1:exon:1";
I	PomBase	CDS	276893	278365	.	+	0	gene_id "SPAC1F5.07c"; transcript_id "SPAC1F5.07c.1"; exon_number "1"; gene_name "hem14"; gene_source "PomBase"; gene_biotype "protein_coding"; transcript_name "hem14"; transcript_source "PomBase"; transcript_biotype "protein_coding"; protein_id "SPAC1F5.07c.1:pep";
I	PomBase	start_codon	276893	276895	.	+	0	gene_id "SPAC1F5.07c"; transcript_id "SPAC1F5.07c.1"; exon_number "1"; gene_name "hem14"; gene_source "PomBase"; gene_biotype "protein_coding"; transcript_name "hem14"; transcript_source "PomBase"; transcript_biotype "protein_coding";
I	PomBase	five_prime_utr	276723	276892	.	+	.	gene_id "SPAC1F5.07c"; transcript_id "SPAC1F5.07c.1"; gene_name "hem14"; gene_source "PomBase"; gene_biotype "protein_coding"; transcript_name "hem14"; transcript_source "PomBase"; transcript_biotype "protein_coding";
I	PomBase	three_prime_utr	278366	278573	.	+	.	gene_id "SPAC1F5.07c"; transcript_id "SPAC1F5.07c.1"; gene_name "hem14"; gene_source "PomBase"; gene_biotype "protein_coding"; transcript_name "hem14"; transcript_source "PomBase"; transcript_biotype "protein_coding";
I	PomBase	gene	281774	282745	.	+	.	gene_id "SPAC1F5.05c"; gene_name "mso1"; gene_source "PomBase"; gene_biotype "protein_coding";
I	PomBase	transcript	281774	282745	.	+	.	gene_id "SPAC1F5.05c"; transcript_id "SPAC1F5.05c.1"; gene_name "mso1"; gene_source "PomBase"; gene_biotype "protein_coding"; transcript_name "mso1"; transcript_source "PomBase"; transcript_biotype "protein_coding";
I	PomBase	exon	281774	282745	.	+	.	gene_id "SPAC1F5.05c"; transcript_id "SPAC1F5.05c.1"; exon_number "1"; gene_name "mso1"; gene_source "PomBase"; gene_biotype "protein_coding"; transcript_name "mso1"; transcript_source "PomBase"; transcript_biotype "protein_coding"; exon_id "SPAC1F5.05c.1:exon:1";
I	PomBase	CDS	281949	282404	.	+	0	gene_id "SPAC1F5.05c"; transcript_id "SPAC1F5.05c.1"; exon_number "1"; gene_name "mso1"; gene_source "PomBase"; gene_biotype "protein_coding"; transcript_name "mso1"; transcript_source "PomBase"; transcript_biotype "protein_coding"; protein_id "SPAC1F5.05c.1:pep";
I	PomBase	start_codon	281949	281951	.	+	0	gene_id "SPAC1F5.05c"; transcript_id "SPAC1F5.05c.1"; exon_number "1"; gene_name "mso1"; gene_source "PomBase"; gene_biotype "protein_coding"; transcript_name "mso1"; transcript_source "PomBase"; transcript_biotype "protein_coding";
I	PomBase	five_prime_utr	281774	281948	.	+	.	gene_id "SPAC1F5.05c"; transcript_id "SPAC1F5.05c.1"; gene_name "mso1"; gene_source "PomBase"; gene_biotype "protein_coding"; transcript_name "mso1"; transcript_source "PomBase"; transcript_biotype "protein_coding";
I	PomBase	three_prime_utr	282405	282745	.	+	.	gene_id "SPAC1F5.05c"; transcript_id "SPAC1F5.05c.1"; gene_name "mso1"; gene_source "PomBase"; gene_biotype "protein_coding"; transcript_name "mso1"; transcript_source "PomBase"; transcript_biotype "protein_coding";
I	PomBase	gene	283287	289200	.	+	.	gene_id "SPAC1F5.04c"; gene_name "cdc12"; gene_source "PomBase"; gene_biotype "protein_coding";
I	PomBase	transcript	283287	289200	.	+	.	gene_id "SPAC1F5.04c"; transcript_id "SPAC1F5.04c.1"; gene_name "cdc12"; gene_source "PomBase"; gene_biotype "protein_coding"; transcript_name "cdc12"; transcript_source "PomBase"; transcript_biotype "protein_coding";
I	PomBase	exon	283287	289200	.	+	.	gene_id "SPAC1F5.04c"; transcript_id "SPAC1F5.04c.1"; exon_number "1"; gene_name "cdc12"; gene_source "PomBase"; gene_biotype "protein_coding"; transcript_name "cdc12"; transcript_source "PomBase"; transcript_biotype "protein_coding"; exon_id "SPAC1F5.04c.1:exon:1";
I	PomBase	CDS	283476	289001	.	+	0	gene_id "SPAC1F5.04c"; transcript_id "SPAC1F5.04c.1"; exon_number "1"; gene_name "cdc12"; gene_source "PomBase"; gene_biotype "protein_coding"; transcript_name "cdc12"; transcript_source "PomBase"; transcript_biotype "protein_coding"; protein_id "SPAC1F5.04c.1:pep";
I	PomBase	start_codon	283476	283478	.	+	0	gene_id "SPAC1F5.04c"; transcript_id "SPAC1F5.04c.1"; exon_number "1"; gene_name "cdc12"; gene_source "PomBase"; gene_biotype "protein_coding"; transcript_name "cdc12"; transcript_source "PomBase"; transcript_biotype "protein_coding";
I	PomBase	five_prime_utr	283287	283475	.	+	.	gene_id "SPAC1F5.04c"; transcript_id "SPAC1F5.04c.1"; gene_name "cdc12"; gene_source "PomBase"; gene_biotype "protein_coding"; transcript_name "cdc12"; transcript_source "PomBase"; transcript_biotype "protein_coding";
I	PomBase	three_prime_utr	289002	289200	.	+	.	gene_id "SPAC1F5.04c"; transcript_id "SPAC1F5.04c.1"; gene_name "cdc12"; gene_source "PomBase"; gene_biotype "protein_coding"; transcript_name "cdc12"; transcript_source "PomBase"; transcript_biotype "protein_coding";
I	PomBase	gene	289790	291927	.	+	.	gene_id "SPAC1F5.03c"; gene_name "SPAC1F5.03c"; gene_source "PomBase"; gene_biotype "protein_coding";
I	PomBase	transcript	289790	291927	.	+	.	gene_id "SPAC1F5.03c"; transcript_id "SPAC1F5.03c.1"; gene_name "SPAC1F5.03c"; gene_source "PomBase"; gene_biotype "protein_coding"; transcript_name "SPAC1F5.03c.1"; transcript_source "PomBase"; transcript_biotype "protein_coding";
I	PomBase	exon	289790	289985	.	+	.	gene_id "SPAC1F5.03c"; transcript_id "SPAC1F5.03c.1"; exon_number "1"; gene_name "SPAC1F5.03c"; gene_source "PomBase"; gene_biotype "protein_coding"; transcript_name "SPAC1F5.03c.1"; transcript_source "PomBase"; transcript_biotype "protein_coding"; exon_id "SPAC1F5.03c.1:exon:1";
I	PomBase	CDS	289952	289985	.	+	0	gene_id "SPAC1F5.03c"; transcript_id "SPAC1F5.03c.1"; exon_number "1"; gene_name "SPAC1F5.03c"; gene_source "PomBase"; gene_biotype "protein_coding"; transcript_name "SPAC1F5.03c.1"; transcript_source "PomBase"; transcript_biotype "protein_coding"; protein_id "SPAC1F5.03c.1:pep";
I	PomBase	start_codon	289952	289954	.	+	0	gene_id "SPAC1F5.03c"; transcript_id "SPAC1F5.03c.1"; exon_number "1"; gene_name "SPAC1F5.03c"; gene_source "PomBase"; gene_biotype "protein_coding"; transcript_name "SPAC1F5.03c.1"; transcript_source "PomBase"; transcript_biotype "protein_coding";
I	PomBase	exon	290187	291927	.	+	.	gene_id "SPAC1F5.03c"; transcript_id "SPAC1F5.03c.1"; exon_number "2"; gene_name "SPAC1F5.03c"; gene_source "PomBase"; gene_biotype "protein_coding"; transcript_name "SPAC1F5.03c.1"; transcript_source "PomBase"; transcript_biotype "protein_coding"; exon_id "SPAC1F5.03c.1:exon:2";
I	PomBase	CDS	290187	291301	.	+	2	gene_id "SPAC1F5.03c"; transcript_id "SPAC1F5.03c.1"; exon_number "2"; gene_name "SPAC1F5.03c"; gene_source "PomBase"; gene_biotype "protein_coding"; transcript_name "SPAC1F5.03c.1"; transcript_source "PomBase"; transcript_biotype "protein_coding"; protein_id "SPAC1F5.03c.1:pep";
I	PomBase	five_prime_utr	289790	289951	.	+	.	gene_id "SPAC1F5.03c"; transcript_id "SPAC1F5.03c.1"; gene_name "SPAC1F5.03c"; gene_source "PomBase"; gene_biotype "protein_coding"; transcript_name "SPAC1F5.03c.1"; transcript_source "PomBase"; transcript_biotype "protein_coding";
I	PomBase	three_prime_utr	291302	291927	.	+	.	gene_id "SPAC1F5.03c"; transcript_id "SPAC1F5.03c.1"; gene_name "SPAC1F5.03c"; gene_source "PomBase"; gene_biotype "protein_coding"; transcript_name "SPAC1F5.03c.1"; transcript_source "PomBase"; transcript_biotype "protein_coding";
I	PomBase	gene	291979	293771	.	-	.	gene_id "SPAC1F5.02"; gene_name "pdi1"; gene_source "PomBase"; gene_biotype "protein_coding";
I	PomBase	transcript	291979	293771	.	-	.	gene_id "SPAC1F5.02"; transcript_id "SPAC1F5.02.1"; gene_name "pdi1"; gene_source "PomBase"; gene_biotype "protein_coding"; transcript_name "pdi1"; transcript_source "PomBase"; transcript_biotype "protein_coding";
I	PomBase	exon	291979	293771	.	-	.	gene_id "SPAC1F5.02"; transcript_id "SPAC1F5.02.1"; exon_number "1"; gene_name "pdi1"; gene_source "PomBase"; gene_biotype "protein_coding"; transcript_name "pdi1"; transcript_source "PomBase"; transcript_biotype "protein_coding"; exon_id "SPAC1F5.02.1:exon:1";
I	PomBase	CDS	292260	293738	.	-	0	gene_id "SPAC1F5.02"; transcript_id "SPAC1F5.02.1"; exon_number "1"; gene_name "pdi1"; gene_source "PomBase"; gene_biotype "protein_coding"; transcript_name "pdi1"; transcript_source "PomBase"; transcript_biotype "protein_coding"; protein_id "SPAC1F5.02.1:pep";
I	PomBase	start_codon	293736	293738	.	-	0	gene_id "SPAC1F5.02"; transcript_id "SPAC1F5.02.1"; exon_number "1"; gene_name "pdi1"; gene_source "PomBase"; gene_biotype "protein_coding"; transcript_name "pdi1"; transcript_source "PomBase"; transcript_biotype "protein_coding";
I	PomBase	five_prime_utr	293739	293771	.	-	.	gene_id "SPAC1F5.02"; transcript_id "SPAC1F5.02.1"; gene_name "pdi1"; gene_source "PomBase"; gene_biotype "protein_coding"; transcript_name "pdi1"; transcript_source "PomBase"; transcript_biotype "protein_coding";
I	PomBase	three_prime_utr	291979	292259	.	-	.	gene_id "SPAC1F5.02"; transcript_id "SPAC1F5.02.1"; gene_name "pdi1"; gene_source "PomBase"; gene_biotype "protein_coding"; transcript_name "pdi1"; transcript_source "PomBase"; transcript_biotype "protein_coding";
I	PomBase	gene	294010	294228	.	+	.	gene_id "SPNCRNA.148"; gene_name "SPNCRNA.148"; gene_source "PomBase"; gene_biotype "ncRNA";
I	PomBase	transcript	294010	294228	.	+	.	gene_id "SPNCRNA.148"; transcript_id "SPNCRNA.148.1"; gene_name "SPNCRNA.148"; gene_source "PomBase"; gene_biotype "ncRNA"; transcript_name "SPNCRNA.148.1"; transcript_source "PomBase"; transcript_biotype "ncRNA";
I	PomBase	exon	294010	294228	.	+	.	gene_id "SPNCRNA.148"; transcript_id "SPNCRNA.148.1"; exon_number "1"; gene_name "SPNCRNA.148"; gene_source "PomBase"; gene_biotype "ncRNA"; transcript_name "SPNCRNA.148.1"; transcript_source "PomBase"; transcript_biotype "ncRNA"; exon_id "SPNCRNA.148.1:exon:1";
I	PomBase	gene	294591	299154	.	-	.	gene_id "SPAC18B11.11"; gene_name "SPAC18B11.11"; gene_source "PomBase"; gene_biotype "protein_coding";
I	PomBase	transcript	294591	299154	.	-	.	gene_id "SPAC18B11.11"; transcript_id "SPAC18B11.11.1"; gene_name "SPAC18B11.11"; gene_source "PomBase"; gene_biotype "protein_coding"; transcript_name "SPAC18B11.11.1"; transcript_source "PomBase"; transcript_biotype "protein_coding";
I	PomBase	exon	294591	299154	.	-	.	gene_id "SPAC18B11.11"; transcript_id "SPAC18B11.11.1"; exon_number "1"; gene_name "SPAC18B11.11"; gene_source "PomBase"; gene_biotype "protein_coding"; transcript_name "SPAC18B11.11.1"; transcript_source "PomBase"; transcript_biotype "protein_coding"; exon_id "SPAC18B11.11.1:exon:1";
I	PomBase	CDS	294902	298786	.	-	0	gene_id "SPAC18B11.11"; transcript_id "SPAC18B11.11.1"; exon_number "1"; gene_name "SPAC18B11.11"; gene_source "PomBase"; gene_biotype "protein_coding"; transcript_name "SPAC18B11.11.1"; transcript_source "PomBase"; transcript_biotype "protein_coding"; protein_id "SPAC18B11.11.1:pep";
I	PomBase	start_codon	298784	298786	.	-	0	gene_id "SPAC18B11.11"; transcript_id "SPAC18B11.11.1"; exon_number "1"; gene_name "SPAC18B11.11"; gene_source "PomBase"; gene_biotype "protein_coding"; transcript_name "SPAC18B11.11.1"; transcript_source "PomBase"; transcript_biotype "protein_coding";
I	PomBase	five_prime_utr	298787	299154	.	-	.	gene_id "SPAC18B11.11"; transcript_id "SPAC18B11.11.1"; gene_name "SPAC18B11.11"; gene_source "PomBase"; gene_biotype "protein_coding"; transcript_name "SPAC18B11.11.1"; transcript_source "PomBase"; transcript_biotype "protein_coding";
I	PomBase	three_prime_utr	294591	294901	.	-	.	gene_id "SPAC18B11.11"; transcript_id "SPAC18B11.11.1"; gene_name "SPAC18B11.11"; gene_source "PomBase"; gene_biotype "protein_coding"; transcript_name "SPAC18B11.11.1"; transcript_source "PomBase"; transcript_biotype "protein_coding";
I	PomBase	gene	299278	301837	.	-	.	gene_id "SPAC18B11.10"; gene_name "tup11"; gene_source "PomBase"; gene_biotype "protein_coding";
I	PomBase	transcript	299278	301837	.	-	.	gene_id "SPAC18B11.10"; transcript_id "SPAC18B11.10.1"; gene_name "tup11"; gene_source "PomBase"; gene_biotype "protein_coding"; transcript_name "tup11"; transcript_source "PomBase"; transcript_biotype "protein_coding";
I	PomBase	exon	301588	301837	.	-	.	gene_id "SPAC18B11.10"; transcript_id "SPAC18B11.10.1"; exon_number "1"; gene_name "tup11"; gene_source "PomBase"; gene_biotype "protein_coding"; transcript_name "tup11"; transcript_source "PomBase"; transcript_biotype "protein_coding"; exon_id "SPAC18B11.10.1:exon:1";
I	PomBase	CDS	301588	301711	.	-	0	gene_id "SPAC18B11.10"; transcript_id "SPAC18B11.10.1"; exon_number "1"; gene_name "tup11"; gene_source "PomBase"; gene_biotype "protein_coding"; transcript_name "tup11"; transcript_source "PomBase"; transcript_biotype "protein_coding"; protein_id "SPAC18B11.10.1:pep";
I	PomBase	start_codon	301709	301711	.	-	0	gene_id "SPAC18B11.10"; transcript_id "SPAC18B11.10.1"; exon_number "1"; gene_name "tup11"; gene_source "PomBase"; gene_biotype "protein_coding"; transcript_name "tup11"; transcript_source "PomBase"; transcript_biotype "protein_coding";
I	PomBase	exon	301436	301520	.	-	.	gene_id "SPAC18B11.10"; transcript_id "SPAC18B11.10.1"; exon_number "2"; gene_name "tup11"; gene_source "PomBase"; gene_biotype "protein_coding"; transcript_name "tup11"; transcript_source "PomBase"; transcript_biotype "protein_coding"; exon_id "SPAC18B11.10.1:exon:2";
I	PomBase	CDS	301436	301520	.	-	2	gene_id "SPAC18B11.10"; transcript_id "SPAC18B11.10.1"; exon_number "2"; gene_name "tup11"; gene_source "PomBase"; gene_biotype "protein_coding"; transcript_name "tup11"; transcript_source "PomBase"; transcript_biotype "protein_coding"; protein_id "SPAC18B11.10.1:pep";
I	PomBase	exon	299278	301263	.	-	.	gene_id "SPAC18B11.10"; transcript_id "SPAC18B11.10.1"; exon_number "3"; gene_name "tup11"; gene_source "PomBase"; gene_biotype "protein_coding"; transcript_name "tup11"; transcript_source "PomBase"; transcript_biotype "protein_coding"; exon_id "SPAC18B11.10.1:exon:3";
I	PomBase	CDS	299628	301263	.	-	1	gene_id "SPAC18B11.10"; transcript_id "SPAC18B11.10.1"; exon_number "3"; gene_name "tup11"; gene_source "PomBase"; gene_biotype "protein_coding"; transcript_name "tup11"; transcript_source "PomBase"; transcript_biotype "protein_coding"; protein_id "SPAC18B11.10.1:pep";
I	PomBase	five_prime_utr	301712	301837	.	-	.	gene_id "SPAC18B11.10"; transcript_id "SPAC18B11.10.1"; gene_name "tup11"; gene_source "PomBase"; gene_biotype "protein_coding"; transcript_name "tup11"; transcript_source "PomBase"; transcript_biotype "protein_coding";
I	PomBase	three_prime_utr	299278	299627	.	-	.	gene_id "SPAC18B11.10"; transcript_id "SPAC18B11.10.1"; gene_name "tup11"; gene_source "PomBase"; gene_biotype "protein_coding"; transcript_name "tup11"; transcript_source "PomBase"; transcript_biotype "protein_coding";
I	PomBase	gene	299464	299610	.	+	.	gene_id "SPNCRNA.27"; gene_name "prl27"; gene_source "PomBase"; gene_biotype "ncRNA";
I	PomBase	transcript	299464	299610	.	+	.	gene_id "SPNCRNA.27"; transcript_id "SPNCRNA.27.1"; gene_name "prl27"; gene_source "PomBase"; gene_biotype "ncRNA"; transcript_name "prl27"; transcript_source "PomBase"; transcript_biotype "ncRNA";
I	PomBase	exon	299464	299610	.	+	.	gene_id "SPNCRNA.27"; transcript_id "SPNCRNA.27.1"; exon_number "1"; gene_name "prl27"; gene_source "PomBase"; gene_biotype "ncRNA"; transcript_name "prl27"; transcript_source "PomBase"; transcript_biotype "ncRNA"; exon_id "SPNCRNA.27.1:exon:1";
I	PomBase	gene	300705	301411	.	+	.	gene_id "SPNCRNA.635"; gene_name "tup11-antisense-1"; gene_source "PomBase"; gene_biotype "ncRNA";
I	PomBase	transcript	300705	301411	.	+	.	gene_id "SPNCRNA.635"; transcript_id "SPNCRNA.635.1"; gene_name "tup11-antisense-1"; gene_source "PomBase"; gene_biotype "ncRNA"; transcript_name "tup11-antisense-1"; transcript_source "PomBase"; transcript_biotype "ncRNA";
I	PomBase	exon	300705	301411	.	+	.	gene_id "SPNCRNA.635"; transcript_id "SPNCRNA.635.1"; exon_number "1"; gene_name "tup11-antisense-1"; gene_source "PomBase"; gene_biotype "ncRNA"; transcript_name "tup11-antisense-1"; transcript_source "PomBase"; transcript_biotype "ncRNA"; exon_id "SPNCRNA.635.1:exon:1";
I	PomBase	gene	303004	304161	.	+	.	gene_id "SPAC18B11.09c"; gene_name "SPAC18B11.09c"; gene_source "PomBase"; gene_biotype "protein_coding";
I	PomBase	transcript	303004	304161	.	+	.	gene_id "SPAC18B11.09c"; transcript_id "SPAC18B11.09c.1"; gene_name "SPAC18B11.09c"; gene_source "PomBase"; gene_biotype "protein_coding"; transcript_name "SPAC18B11.09c.1"; transcript_source "PomBase"; transcript_biotype "protein_coding";
I	PomBase	exon	303004	303231	.	+	.	gene_id "SPAC18B11.09c"; transcript_id "SPAC18B11.09c.1"; exon_number "1"; gene_name "SPAC18B11.09c"; gene_source "PomBase"; gene_biotype "protein_coding"; transcript_name "SPAC18B11.09c.1"; transcript_source "PomBase"; transcript_biotype "protein_coding"; exon_id "SPAC18B11.09c.1:exon:1";
I	PomBase	CDS	303161	303231	.	+	0	gene_id "SPAC18B11.09c"; transcript_id "SPAC18B11.09c.1"; exon_number "1"; gene_name "SPAC18B11.09c"; gene_source "PomBase"; gene_biotype "protein_coding"; transcript_name "SPAC18B11.09c.1"; transcript_source "PomBase"; transcript_biotype "protein_coding"; protein_id "SPAC18B11.09c.1:pep";
I	PomBase	start_codon	303161	303163	.	+	0	gene_id "SPAC18B11.09c"; transcript_id "SPAC18B11.09c.1"; exon_number "1"; gene_name "SPAC18B11.09c"; gene_source "PomBase"; gene_biotype "protein_coding"; transcript_name "SPAC18B11.09c.1"; transcript_source "PomBase"; transcript_biotype "protein_coding";
I	PomBase	exon	303334	303640	.	+	.	gene_id "SPAC18B11.09c"; transcript_id "SPAC18B11.09c.1"; exon_number "2"; gene_name "SPAC18B11.09c"; gene_source "PomBase"; gene_biotype "protein_coding"; transcript_name "SPAC18B11.09c.1"; transcript_source "PomBase"; transcript_biotype "protein_coding"; exon_id "SPAC18B11.09c.1:exon:2";
I	PomBase	CDS	303334	303640	.	+	1	gene_id "SPAC18B11.09c"; transcript_id "SPAC18B11.09c.1"; exon_number "2"; gene_name "SPAC18B11.09c"; gene_source "PomBase"; gene_biotype "protein_coding"; transcript_name "SPAC18B11.09c.1"; transcript_source "PomBase"; transcript_biotype "protein_coding"; protein_id "SPAC18B11.09c.1:pep";
I	PomBase	exon	303716	303793	.	+	.	gene_id "SPAC18B11.09c"; transcript_id "SPAC18B11.09c.1"; exon_number "3"; gene_name "SPAC18B11.09c"; gene_source "PomBase"; gene_biotype "protein_coding"; transcript_name "SPAC18B11.09c.1"; transcript_source "PomBase"; transcript_biotype "protein_coding"; exon_id "SPAC18B11.09c.1:exon:3";
I	PomBase	CDS	303716	303793	.	+	0	gene_id "SPAC18B11.09c"; transcript_id "SPAC18B11.09c.1"; exon_number "3"; gene_name "SPAC18B11.09c"; gene_source "PomBase"; gene_biotype "protein_coding"; transcript_name "SPAC18B11.09c.1"; transcript_source "PomBase"; transcript_biotype "protein_coding"; protein_id "SPAC18B11.09c.1:pep";
I	PomBase	exon	303852	304161	.	+	.	gene_id "SPAC18B11.09c"; transcript_id "SPAC18B11.09c.1"; exon_number "4"; gene_name "SPAC18B11.09c"; gene_source "PomBase"; gene_biotype "protein_coding"; transcript_name "SPAC18B11.09c.1"; transcript_source "PomBase"; transcript_biotype "protein_coding"; exon_id "SPAC18B11.09c.1:exon:4";
I	PomBase	CDS	303852	304016	.	+	0	gene_id "SPAC18B11.09c"; transcript_id "SPAC18B11.09c.1"; exon_number "4"; gene_name "SPAC18B11.09c"; gene_source "PomBase"; gene_biotype "protein_coding"; transcript_name "SPAC18B11.09c.1"; transcript_source "PomBase"; transcript_biotype "protein_coding"; protein_id "SPAC18B11.09c.1:pep";
I	PomBase	stop_codon	304017	304019	.	+	0	gene_id "SPAC18B11.09c"; transcript_id "SPAC18B11.09c.1"; exon_number "4"; gene_name "SPAC18B11.09c"; gene_source "PomBase"; gene_biotype "protein_coding"; transcript_name "SPAC18B11.09c.1"; transcript_source "PomBase"; transcript_biotype "protein_coding";
I	PomBase	five_prime_utr	303004	303160	.	+	.	gene_id "SPAC18B11.09c"; transcript_id "SPAC18B11.09c.1"; gene_name "SPAC18B11.09c"; gene_source "PomBase"; gene_biotype "protein_coding"; transcript_name "SPAC18B11.09c.1"; transcript_source "PomBase"; transcript_biotype "protein_coding";
I	PomBase	three_prime_utr	304020	304161	.	+	.	gene_id "SPAC18B11.09c"; transcript_id "SPAC18B11.09c.1"; gene_name "SPAC18B11.09c"; gene_source "PomBase"; gene_biotype "protein_coding"; transcript_name "SPAC18B11.09c.1"; transcript_source "PomBase"; transcript_biotype "protein_coding";
I	PomBase	gene	304355	305168	.	+	.	gene_id "SPAC18B11.08c"; gene_name "SPAC18B11.08c"; gene_source "PomBase"; gene_biotype "protein_coding";
I	PomBase	transcript	304355	305168	.	+	.	gene_id "SPAC18B11.08c"; transcript_id "SPAC18B11.08c.1"; gene_name "SPAC18B11.08c"; gene_source "PomBase"; gene_biotype "protein_coding"; transcript_name "SPAC18B11.08c.1"; transcript_source "PomBase"; transcript_biotype "protein_coding";
I	PomBase	exon	304355	304535	.	+	.	gene_id "SPAC18B11.08c"; transcript_id "SPAC18B11.08c.1"; exon_number "1"; gene_name "SPAC18B11.08c"; gene_source "PomBase"; gene_biotype "protein_coding"; transcript_name "SPAC18B11.08c.1"; transcript_source "PomBase"; transcript_biotype "protein_coding"; exon_id "SPAC18B11.08c.1:exon:1";
I	PomBase	CDS	304463	304535	.	+	0	gene_id "SPAC18B11.08c"; transcript_id "SPAC18B11.08c.1"; exon_number "1"; gene_name "SPAC18B11.08c"; gene_source "PomBase"; gene_biotype "protein_coding"; transcript_name "SPAC18B11.08c.1"; transcript_source "PomBase"; transcript_biotype "protein_coding"; protein_id "SPAC18B11.08c.1:pep";
I	PomBase	start_codon	304463	304465	.	+	0	gene_id "SPAC18B11.08c"; transcript_id "SPAC18B11.08c.1"; exon_number "1"; gene_name "SPAC18B11.08c"; gene_source "PomBase"; gene_biotype "protein_coding"; transcript_name "SPAC18B11.08c.1"; transcript_source "PomBase"; transcript_biotype "protein_coding";
I	PomBase	exon	304674	304731	.	+	.	gene_id "SPAC18B11.08c"; transcript_id "SPAC18B11.08c.1"; exon_number "2"; gene_name "SPAC18B11.08c"; gene_source "PomBase"; gene_biotype "protein_coding"; transcript_name "SPAC18B11.08c.1"; transcript_source "PomBase"; transcript_biotype "protein_coding"; exon_id "SPAC18B11.08c.1:exon:2";
I	PomBase	CDS	304674	304731	.	+	2	gene_id "SPAC18B11.08c"; transcript_id "SPAC18B11.08c.1"; exon_number "2"; gene_name "SPAC18B11.08c"; gene_source "PomBase"; gene_biotype "protein_coding"; transcript_name "SPAC18B11.08c.1"; transcript_source "PomBase"; transcript_biotype "protein_coding"; protein_id "SPAC18B11.08c.1:pep";
I	PomBase	exon	304771	304860	.	+	.	gene_id "SPAC18B11.08c"; transcript_id "SPAC18B11.08c.1"; exon_number "3"; gene_name "SPAC18B11.08c"; gene_source "PomBase"; gene_biotype "protein_coding"; transcript_name "SPAC18B11.08c.1"; transcript_source "PomBase"; transcript_biotype "protein_coding"; exon_id "SPAC18B11.08c.1:exon:3";
I	PomBase	CDS	304771	304860	.	+	1	gene_id "SPAC18B11.08c"; transcript_id "SPAC18B11.08c.1"; exon_number "3"; gene_name "SPAC18B11.08c"; gene_source "PomBase"; gene_biotype "protein_coding"; transcript_name "SPAC18B11.08c.1"; transcript_source "PomBase"; transcript_biotype "protein_coding"; protein_id "SPAC18B11.08c.1:pep";
I	PomBase	exon	304919	304955	.	+	.	gene_id "SPAC18B11.08c"; transcript_id "SPAC18B11.08c.1"; exon_number "4"; gene_name "SPAC18B11.08c"; gene_source "PomBase"; gene_biotype "protein_coding"; transcript_name "SPAC18B11.08c.1"; transcript_source "PomBase"; transcript_biotype "protein_coding"; exon_id "SPAC18B11.08c.1:exon:4";
I	PomBase	CDS	304919	304955	.	+	1	gene_id "SPAC18B11.08c"; transcript_id "SPAC18B11.08c.1"; exon_number "4"; gene_name "SPAC18B11.08c"; gene_source "PomBase"; gene_biotype "protein_coding"; transcript_name "SPAC18B11.08c.1"; transcript_source "PomBase"; transcript_biotype "protein_coding"; protein_id "SPAC18B11.08c.1:pep";
I	PomBase	exon	305000	305168	.	+	.	gene_id "SPAC18B11.08c"; transcript_id "SPAC18B11.08c.1"; exon_number "5"; gene_name "SPAC18B11.08c"; gene_source "PomBase"; gene_biotype "protein_coding"; transcript_name "SPAC18B11.08c.1"; transcript_source "PomBase"; transcript_biotype "protein_coding"; exon_id "SPAC18B11.08c.1:exon:5";
I	PomBase	CDS	305000	305026	.	+	0	gene_id "SPAC18B11.08c"; transcript_id "SPAC18B11.08c.1"; exon_number "5"; gene_name "SPAC18B11.08c"; gene_source "PomBase"; gene_biotype "protein_coding"; transcript_name "SPAC18B11.08c.1"; transcript_source "PomBase"; transcript_biotype "protein_coding"; protein_id "SPAC18B11.08c.1:pep";
I	PomBase	stop_codon	305027	305029	.	+	0	gene_id "SPAC18B11.08c"; transcript_id "SPAC18B11.08c.1"; exon_number "5"; gene_name "SPAC18B11.08c"; gene_source "PomBase"; gene_biotype "protein_coding"; transcript_name "SPAC18B11.08c.1"; transcript_source "PomBase"; transcript_biotype "protein_coding";
I	PomBase	five_prime_utr	304355	304462	.	+	.	gene_id "SPAC18B11.08c"; transcript_id "SPAC18B11.08c.1"; gene_name "SPAC18B11.08c"; gene_source "PomBase"; gene_biotype "protein_coding"; transcript_name "SPAC18B11.08c.1"; transcript_source "PomBase"; transcript_biotype "protein_coding";
I	PomBase	three_prime_utr	305030	305168	.	+	.	gene_id "SPAC18B11.08c"; transcript_id "SPAC18B11.08c.1"; gene_name "SPAC18B11.08c"; gene_source "PomBase"; gene_biotype "protein_coding"; transcript_name "SPAC18B11.08c.1"; transcript_source "PomBase"; transcript_biotype "protein_coding";
I	PomBase	gene	305602	306762	.	+	.	gene_id "SPAC18B11.07c"; gene_name "rhp6"; gene_source "PomBase"; gene_biotype "protein_coding";
I	PomBase	transcript	305602	306762	.	+	.	gene_id "SPAC18B11.07c"; transcript_id "SPAC18B11.07c.1"; gene_name "rhp6"; gene_source "PomBase"; gene_biotype "protein_coding"; transcript_name "rhp6"; transcript_source "PomBase"; transcript_biotype "protein_coding";
I	PomBase	exon	305602	305764	.	+	.	gene_id "SPAC18B11.07c"; transcript_id "SPAC18B11.07c.1"; exon_number "1"; gene_name "rhp6"; gene_source "PomBase"; gene_biotype "protein_coding"; transcript_name "rhp6"; transcript_source "PomBase"; transcript_biotype "protein_coding"; exon_id "SPAC18B11.07c.1:exon:1";
I	PomBase	CDS	305723	305764	.	+	0	gene_id "SPAC18B11.07c"; transcript_id "SPAC18B11.07c.1"; exon_number "1"; gene_name "rhp6"; gene_source "PomBase"; gene_biotype "protein_coding"; transcript_name "rhp6"; transcript_source "PomBase"; transcript_biotype "protein_coding"; protein_id "SPAC18B11.07c.1:pep";
I	PomBase	start_codon	305723	305725	.	+	0	gene_id "SPAC18B11.07c"; transcript_id "SPAC18B11.07c.1"; exon_number "1"; gene_name "rhp6"; gene_source "PomBase"; gene_biotype "protein_coding"; transcript_name "rhp6"; transcript_source "PomBase"; transcript_biotype "protein_coding";
I	PomBase	exon	305812	305876	.	+	.	gene_id "SPAC18B11.07c"; transcript_id "SPAC18B11.07c.1"; exon_number "2"; gene_name "rhp6"; gene_source "PomBase"; gene_biotype "protein_coding"; transcript_name "rhp6"; transcript_source "PomBase"; transcript_biotype "protein_coding"; exon_id "SPAC18B11.07c.1:exon:2";
I	PomBase	CDS	305812	305876	.	+	0	gene_id "SPAC18B11.07c"; transcript_id "SPAC18B11.07c.1"; exon_number "2"; gene_name "rhp6"; gene_source "PomBase"; gene_biotype "protein_coding"; transcript_name "rhp6"; transcript_source "PomBase"; transcript_biotype "protein_coding"; protein_id "SPAC18B11.07c.1:pep";
I	PomBase	exon	306090	306210	.	+	.	gene_id "SPAC18B11.07c"; transcript_id "SPAC18B11.07c.1"; exon_number "3"; gene_name "rhp6"; gene_source "PomBase"; gene_biotype "protein_coding"; transcript_name "rhp6"; transcript_source "PomBase"; transcript_biotype "protein_coding"; exon_id "SPAC18B11.07c.1:exon:3";
I	PomBase	CDS	306090	306210	.	+	1	gene_id "SPAC18B11.07c"; transcript_id "SPAC18B11.07c.1"; exon_number "3"; gene_name "rhp6"; gene_source "PomBase"; gene_biotype "protein_coding"; transcript_name "rhp6"; transcript_source "PomBase"; transcript_biotype "protein_coding"; protein_id "SPAC18B11.07c.1:pep";
I	PomBase	exon	306316	306419	.	+	.	gene_id "SPAC18B11.07c"; transcript_id "SPAC18B11.07c.1"; exon_number "4"; gene_name "rhp6"; gene_source "PomBase"; gene_biotype "protein_coding"; transcript_name "rhp6"; transcript_source "PomBase"; transcript_biotype "protein_coding"; exon_id "SPAC18B11.07c.1:exon:4";
I	PomBase	CDS	306316	306419	.	+	0	gene_id "SPAC18B11.07c"; transcript_id "SPAC18B11.07c.1"; exon_number "4"; gene_name "rhp6"; gene_source "PomBase"; gene_biotype "protein_coding"; transcript_name "rhp6"; transcript_source "PomBase"; transcript_biotype "protein_coding"; protein_id "SPAC18B11.07c.1:pep";
I	PomBase	exon	306468	306762	.	+	.	gene_id "SPAC18B11.07c"; transcript_id "SPAC18B11.07c.1"; exon_number "5"; gene_name "rhp6"; gene_source "PomBase"; gene_biotype "protein_coding"; transcript_name "rhp6"; transcript_source "PomBase"; transcript_biotype "protein_coding"; exon_id "SPAC18B11.07c.1:exon:5";
I	PomBase	CDS	306468	306591	.	+	1	gene_id "SPAC18B11.07c"; transcript_id "SPAC18B11.07c.1"; exon_number "5"; gene_name "rhp6"; gene_source "PomBase"; gene_biotype "protein_coding"; transcript_name "rhp6"; transcript_source "PomBase"; transcript_biotype "protein_coding"; protein_id "SPAC18B11.07c.1:pep";
I	PomBase	five_prime_utr	305602	305722	.	+	.	gene_id "SPAC18B11.07c"; transcript_id "SPAC18B11.07c.1"; gene_name "rhp6"; gene_source "PomBase"; gene_biotype "protein_coding"; transcript_name "rhp6"; transcript_source "PomBase"; transcript_biotype "protein_coding";
I	PomBase	three_prime_utr	306592	306762	.	+	.	gene_id "SPAC18B11.07c"; transcript_id "SPAC18B11.07c.1"; gene_name "rhp6"; gene_source "PomBase"; gene_biotype "protein_coding"; transcript_name "rhp6"; transcript_source "PomBase"; transcript_biotype "protein_coding";
I	PomBase	gene	306764	308031	.	-	.	gene_id "SPAC18B11.06"; gene_name "lcp5"; gene_source "PomBase"; gene_biotype "protein_coding";
I	PomBase	transcript	306764	308031	.	-	.	gene_id "SPAC18B11.06"; transcript_id "SPAC18B11.06.1"; gene_name "lcp5"; gene_source "PomBase"; gene_biotype "protein_coding"; transcript_name "lcp5"; transcript_source "PomBase"; transcript_biotype "protein_coding";
I	PomBase	exon	306764	308031	.	-	.	gene_id "SPAC18B11.06"; transcript_id "SPAC18B11.06.1"; exon_number "1"; gene_name "lcp5"; gene_source "PomBase"; gene_biotype "protein_coding"; transcript_name "lcp5"; transcript_source "PomBase"; transcript_biotype "protein_coding"; exon_id "SPAC18B11.06.1:exon:1";
I	PomBase	CDS	306964	307947	.	-	0	gene_id "SPAC18B11.06"; transcript_id "SPAC18B11.06.1"; exon_number "1"; gene_name "lcp5"; gene_source "PomBase"; gene_biotype "protein_coding"; transcript_name "lcp5"; transcript_source "PomBase"; transcript_biotype "protein_coding"; protein_id "SPAC18B11.06.1:pep";
I	PomBase	start_codon	307945	307947	.	-	0	gene_id "SPAC18B11.06"; transcript_id "SPAC18B11.06.1"; exon_number "1"; gene_name "lcp5"; gene_source "PomBase"; gene_biotype "protein_coding"; transcript_name "lcp5"; transcript_source "PomBase"; transcript_biotype "protein_coding";
I	PomBase	five_prime_utr	307948	308031	.	-	.	gene_id "SPAC18B11.06"; transcript_id "SPAC18B11.06.1"; gene_name "lcp5"; gene_source "PomBase"; gene_biotype "protein_coding"; transcript_name "lcp5"; transcript_source "PomBase"; transcript_biotype "protein_coding";
I	PomBase	three_prime_utr	306764	306963	.	-	.	gene_id "SPAC18B11.06"; transcript_id "SPAC18B11.06.1"; gene_name "lcp5"; gene_source "PomBase"; gene_biotype "protein_coding"; transcript_name "lcp5"; transcript_source "PomBase"; transcript_biotype "protein_coding";
I	PomBase	gene	308138	310034	.	-	.	gene_id "SPAC18B11.05"; gene_name "gpi18"; gene_source "PomBase"; gene_biotype "protein_coding";
I	PomBase	transcript	308138	310034	.	-	.	gene_id "SPAC18B11.05"; transcript_id "SPAC18B11.05.1"; gene_name "gpi18"; gene_source "PomBase"; gene_biotype "protein_coding"; transcript_name "gpi18"; transcript_source "PomBase"; transcript_biotype "protein_coding";
I	PomBase	exon	309889	310034	.	-	.	gene_id "SPAC18B11.05"; transcript_id "SPAC18B11.05.1"; exon_number "1"; gene_name "gpi18"; gene_source "PomBase"; gene_biotype "protein_coding"; transcript_name "gpi18"; transcript_source "PomBase"; transcript_biotype "protein_coding"; exon_id "SPAC18B11.05.1:five_prime_UTR:1";
I	PomBase	exon	309751	309839	.	-	.	gene_id "SPAC18B11.05"; transcript_id "SPAC18B11.05.1"; exon_number "2"; gene_name "gpi18"; gene_source "PomBase"; gene_biotype "protein_coding"; transcript_name "gpi18"; transcript_source "PomBase"; transcript_biotype "protein_coding"; exon_id "SPAC18B11.05.1:exon:1";
I	PomBase	CDS	309751	309806	.	-	0	gene_id "SPAC18B11.05"; transcript_id "SPAC18B11.05.1"; exon_number "2"; gene_name "gpi18"; gene_source "PomBase"; gene_biotype "protein_coding"; transcript_name "gpi18"; transcript_source "PomBase"; transcript_biotype "protein_coding"; protein_id "SPAC18B11.05.1:pep";
I	PomBase	start_codon	309804	309806	.	-	0	gene_id "SPAC18B11.05"; transcript_id "SPAC18B11.05.1"; exon_number "2"; gene_name "gpi18"; gene_source "PomBase"; gene_biotype "protein_coding"; transcript_name "gpi18"; transcript_source "PomBase"; transcript_biotype "protein_coding";
I	PomBase	exon	308138	309719	.	-	.	gene_id "SPAC18B11.05"; transcript_id "SPAC18B11.05.1"; exon_number "3"; gene_name "gpi18"; gene_source "PomBase"; gene_biotype "protein_coding"; transcript_name "gpi18"; transcript_source "PomBase"; transcript_biotype "protein_coding"; exon_id "SPAC18B11.05.1:exon:2";
I	PomBase	CDS	308381	309719	.	-	1	gene_id "SPAC18B11.05"; transcript_id "SPAC18B11.05.1"; exon_number "3"; gene_name "gpi18"; gene_source "PomBase"; gene_biotype "protein_coding"; transcript_name "gpi18"; transcript_source "PomBase"; transcript_biotype "protein_coding"; protein_id "SPAC18B11.05.1:pep";
I	PomBase	five_prime_utr	309889	310034	.	-	.	gene_id "SPAC18B11.05"; transcript_id "SPAC18B11.05.1"; gene_name "gpi18"; gene_source "PomBase"; gene_biotype "protein_coding"; transcript_name "gpi18"; transcript_source "PomBase"; transcript_biotype "protein_coding";
I	PomBase	five_prime_utr	309807	309839	.	-	.	gene_id "SPAC18B11.05"; transcript_id "SPAC18B11.05.1"; gene_name "gpi18"; gene_source "PomBase"; gene_biotype "protein_coding"; transcript_name "gpi18"; transcript_source "PomBase"; transcript_biotype "protein_coding";
I	PomBase	three_prime_utr	308138	308380	.	-	.	gene_id "SPAC18B11.05"; transcript_id "SPAC18B11.05.1"; gene_name "gpi18"; gene_source "PomBase"; gene_biotype "protein_coding"; transcript_name "gpi18"; transcript_source "PomBase"; transcript_biotype "protein_coding";
I	PomBase	gene	310157	311712	.	-	.	gene_id "SPAC18B11.04"; gene_name "ncs1"; gene_source "PomBase"; gene_biotype "protein_coding";
I	PomBase	transcript	310157	311712	.	-	.	gene_id "SPAC18B11.04"; transcript_id "SPAC18B11.04.1"; gene_name "ncs1"; gene_source "PomBase"; gene_biotype "protein_coding"; transcript_name "ncs1"; transcript_source "PomBase"; transcript_biotype "protein_coding";
I	PomBase	exon	311371	311712	.	-	.	gene_id "SPAC18B11.04"; transcript_id "SPAC18B11.04.1"; exon_number "1"; gene_name "ncs1"; gene_source "PomBase"; gene_biotype "protein_coding"; transcript_name "ncs1"; transcript_source "PomBase"; transcript_biotype "protein_coding"; exon_id "SPAC18B11.04.1:exon:1";
I	PomBase	CDS	311371	311434	.	-	0	gene_id "SPAC18B11.04"; transcript_id "SPAC18B11.04.1"; exon_number "1"; gene_name "ncs1"; gene_source "PomBase"; gene_biotype "protein_coding"; transcript_name "ncs1"; transcript_source "PomBase"; transcript_biotype "protein_coding"; protein_id "SPAC18B11.04.1:pep";
I	PomBase	start_codon	311432	311434	.	-	0	gene_id "SPAC18B11.04"; transcript_id "SPAC18B11.04.1"; exon_number "1"; gene_name "ncs1"; gene_source "PomBase"; gene_biotype "protein_coding"; transcript_name "ncs1"; transcript_source "PomBase"; transcript_biotype "protein_coding";
I	PomBase	exon	311299	311331	.	-	.	gene_id "SPAC18B11.04"; transcript_id "SPAC18B11.04.1"; exon_number "2"; gene_name "ncs1"; gene_source "PomBase"; gene_biotype "protein_coding"; transcript_name "ncs1"; transcript_source "PomBase"; transcript_biotype "protein_coding"; exon_id "SPAC18B11.04.1:exon:2";
I	PomBase	CDS	311299	311331	.	-	2	gene_id "SPAC18B11.04"; transcript_id "SPAC18B11.04.1"; exon_number "2"; gene_name "ncs1"; gene_source "PomBase"; gene_biotype "protein_coding"; transcript_name "ncs1"; transcript_source "PomBase"; transcript_biotype "protein_coding"; protein_id "SPAC18B11.04.1:pep";
I	PomBase	exon	310837	311180	.	-	.	gene_id "SPAC18B11.04"; transcript_id "SPAC18B11.04.1"; exon_number "3"; gene_name "ncs1"; gene_source "PomBase"; gene_biotype "protein_coding"; transcript_name "ncs1"; transcript_source "PomBase"; transcript_biotype "protein_coding"; exon_id "SPAC18B11.04.1:exon:3";
I	PomBase	CDS	310837	311180	.	-	2	gene_id "SPAC18B11.04"; transcript_id "SPAC18B11.04.1"; exon_number "3"; gene_name "ncs1"; gene_source "PomBase"; gene_biotype "protein_coding"; transcript_name "ncs1"; transcript_source "PomBase"; transcript_biotype "protein_coding"; protein_id "SPAC18B11.04.1:pep";
I	PomBase	exon	310157	310790	.	-	.	gene_id "SPAC18B11.04"; transcript_id "SPAC18B11.04.1"; exon_number "4"; gene_name "ncs1"; gene_source "PomBase"; gene_biotype "protein_coding"; transcript_name "ncs1"; transcript_source "PomBase"; transcript_biotype "protein_coding"; exon_id "SPAC18B11.04.1:exon:4";
I	PomBase	CDS	310662	310790	.	-	0	gene_id "SPAC18B11.04"; transcript_id "SPAC18B11.04.1"; exon_number "4"; gene_name "ncs1"; gene_source "PomBase"; gene_biotype "protein_coding"; transcript_name "ncs1"; transcript_source "PomBase"; transcript_biotype "protein_coding"; protein_id "SPAC18B11.04.1:pep";
I	PomBase	stop_codon	310659	310661	.	-	0	gene_id "SPAC18B11.04"; transcript_id "SPAC18B11.04.1"; exon_number "4"; gene_name "ncs1"; gene_source "PomBase"; gene_biotype "protein_coding"; transcript_name "ncs1"; transcript_source "PomBase"; transcript_biotype "protein_coding";
I	PomBase	five_prime_utr	311435	311712	.	-	.	gene_id "SPAC18B11.04"; transcript_id "SPAC18B11.04.1"; gene_name "ncs1"; gene_source "PomBase"; gene_biotype "protein_coding"; transcript_name "ncs1"; transcript_source "PomBase"; transcript_biotype "protein_coding";
I	PomBase	three_prime_utr	310157	310658	.	-	.	gene_id "SPAC18B11.04"; transcript_id "SPAC18B11.04.1"; gene_name "ncs1"; gene_source "PomBase"; gene_biotype "protein_coding"; transcript_name "ncs1"; transcript_source "PomBase"; transcript_biotype "protein_coding";
I	PomBase	gene	311920	314040	.	+	.	gene_id "SPAC18B11.03c"; gene_name "SPAC18B11.03c"; gene_source "PomBase"; gene_biotype "protein_coding";
I	PomBase	transcript	311920	314040	.	+	.	gene_id "SPAC18B11.03c"; transcript_id "SPAC18B11.03c.1"; gene_name "SPAC18B11.03c"; gene_source "PomBase"; gene_biotype "protein_coding"; transcript_name "SPAC18B11.03c.1"; transcript_source "PomBase"; transcript_biotype "protein_coding";
I	PomBase	exon	311920	312212	.	+	.	gene_id "SPAC18B11.03c"; transcript_id "SPAC18B11.03c.1"; exon_number "1"; gene_name "SPAC18B11.03c"; gene_source "PomBase"; gene_biotype "protein_coding"; transcript_name "SPAC18B11.03c.1"; transcript_source "PomBase"; transcript_biotype "protein_coding"; exon_id "SPAC18B11.03c.1:exon:1";
I	PomBase	CDS	312182	312212	.	+	0	gene_id "SPAC18B11.03c"; transcript_id "SPAC18B11.03c.1"; exon_number "1"; gene_name "SPAC18B11.03c"; gene_source "PomBase"; gene_biotype "protein_coding"; transcript_name "SPAC18B11.03c.1"; transcript_source "PomBase"; transcript_biotype "protein_coding"; protein_id "SPAC18B11.03c.1:pep";
I	PomBase	start_codon	312182	312184	.	+	0	gene_id "SPAC18B11.03c"; transcript_id "SPAC18B11.03c.1"; exon_number "1"; gene_name "SPAC18B11.03c"; gene_source "PomBase"; gene_biotype "protein_coding"; transcript_name "SPAC18B11.03c.1"; transcript_source "PomBase"; transcript_biotype "protein_coding";
I	PomBase	exon	312274	314040	.	+	.	gene_id "SPAC18B11.03c"; transcript_id "SPAC18B11.03c.1"; exon_number "2"; gene_name "SPAC18B11.03c"; gene_source "PomBase"; gene_biotype "protein_coding"; transcript_name "SPAC18B11.03c.1"; transcript_source "PomBase"; transcript_biotype "protein_coding"; exon_id "SPAC18B11.03c.1:exon:2";
I	PomBase	CDS	312274	313586	.	+	2	gene_id "SPAC18B11.03c"; transcript_id "SPAC18B11.03c.1"; exon_number "2"; gene_name "SPAC18B11.03c"; gene_source "PomBase"; gene_biotype "protein_coding"; transcript_name "SPAC18B11.03c.1"; transcript_source "PomBase"; transcript_biotype "protein_coding"; protein_id "SPAC18B11.03c.1:pep";
I	PomBase	five_prime_utr	311920	312181	.	+	.	gene_id "SPAC18B11.03c"; transcript_id "SPAC18B11.03c.1"; gene_name "SPAC18B11.03c"; gene_source "PomBase"; gene_biotype "protein_coding"; transcript_name "SPAC18B11.03c.1"; transcript_source "PomBase"; transcript_biotype "protein_coding";
I	PomBase	three_prime_utr	313587	314040	.	+	.	gene_id "SPAC18B11.03c"; transcript_id "SPAC18B11.03c.1"; gene_name "SPAC18B11.03c"; gene_source "PomBase"; gene_biotype "protein_coding"; transcript_name "SPAC18B11.03c.1"; transcript_source "PomBase"; transcript_biotype "protein_coding";
I	PomBase	gene	312215	316276	.	-	.	gene_id "SPNCRNA.636"; gene_name "SPNCRNA.636"; gene_source "PomBase"; gene_biotype "ncRNA";
I	PomBase	transcript	312215	316276	.	-	.	gene_id "SPNCRNA.636"; transcript_id "SPNCRNA.636.1"; gene_name "SPNCRNA.636"; gene_source "PomBase"; gene_biotype "ncRNA"; transcript_name "SPNCRNA.636.1"; transcript_source "PomBase"; transcript_biotype "ncRNA";
I	PomBase	exon	312215	316276	.	-	.	gene_id "SPNCRNA.636"; transcript_id "SPNCRNA.636.1"; exon_number "1"; gene_name "SPNCRNA.636"; gene_source "PomBase"; gene_biotype "ncRNA"; transcript_name "SPNCRNA.636.1"; transcript_source "PomBase"; transcript_biotype "ncRNA"; exon_id "SPNCRNA.636.1:exon:1";
I	PomBase	gene	313974	315335	.	+	.	gene_id "SPAC18B11.02c"; gene_name "SPAC18B11.02c"; gene_source "PomBase"; gene_biotype "protein_coding";
I	PomBase	transcript	313974	315335	.	+	.	gene_id "SPAC18B11.02c"; transcript_id "SPAC18B11.02c.1"; gene_name "SPAC18B11.02c"; gene_source "PomBase"; gene_biotype "protein_coding"; transcript_name "SPAC18B11.02c.1"; transcript_source "PomBase"; transcript_biotype "protein_coding";
I	PomBase	exon	313974	315335	.	+	.	gene_id "SPAC18B11.02c"; transcript_id "SPAC18B11.02c.1"; exon_number "1"; gene_name "SPAC18B11.02c"; gene_source "PomBase"; gene_biotype "protein_coding"; transcript_name "SPAC18B11.02c.1"; transcript_source "PomBase"; transcript_biotype "protein_coding"; exon_id "SPAC18B11.02c.1:exon:1";
I	PomBase	CDS	314030	315214	.	+	0	gene_id "SPAC18B11.02c"; transcript_id "SPAC18B11.02c.1"; exon_number "1"; gene_name "SPAC18B11.02c"; gene_source "PomBase"; gene_biotype "protein_coding"; transcript_name "SPAC18B11.02c.1"; transcript_source "PomBase"; transcript_biotype "protein_coding"; protein_id "SPAC18B11.02c.1:pep";
I	PomBase	start_codon	314030	314032	.	+	0	gene_id "SPAC18B11.02c"; transcript_id "SPAC18B11.02c.1"; exon_number "1"; gene_name "SPAC18B11.02c"; gene_source "PomBase"; gene_biotype "protein_coding"; transcript_name "SPAC18B11.02c.1"; transcript_source "PomBase"; transcript_biotype "protein_coding";
I	PomBase	five_prime_utr	313974	314029	.	+	.	gene_id "SPAC18B11.02c"; transcript_id "SPAC18B11.02c.1"; gene_name "SPAC18B11.02c"; gene_source "PomBase"; gene_biotype "protein_coding"; transcript_name "SPAC18B11.02c.1"; transcript_source "PomBase"; transcript_biotype "protein_coding";
I	PomBase	three_prime_utr	315215	315335	.	+	.	gene_id "SPAC18B11.02c"; transcript_id "SPAC18B11.02c.1"; gene_name "SPAC18B11.02c"; gene_source "PomBase"; gene_biotype "protein_coding"; transcript_name "SPAC18B11.02c.1"; transcript_source "PomBase"; transcript_biotype "protein_coding";
I	PomBase	gene	315394	317585	.	+	.	gene_id "SPAC12G12.16c"; gene_name "SPAC12G12.16c"; gene_source "PomBase"; gene_biotype "protein_coding";
I	PomBase	transcript	315394	317585	.	+	.	gene_id "SPAC12G12.16c"; transcript_id "SPAC12G12.16c.1"; gene_name "SPAC12G12.16c"; gene_source "PomBase"; gene_biotype "protein_coding"; transcript_name "SPAC12G12.16c.1"; transcript_source "PomBase"; transcript_biotype "protein_coding";
I	PomBase	exon	315394	317585	.	+	.	gene_id "SPAC12G12.16c"; transcript_id "SPAC12G12.16c.1"; exon_number "1"; gene_name "SPAC12G12.16c"; gene_source "PomBase"; gene_biotype "protein_coding"; transcript_name "SPAC12G12.16c.1"; transcript_source "PomBase"; transcript_biotype "protein_coding"; exon_id "SPAC12G12.16c.1:exon:1";
I	PomBase	CDS	315707	317197	.	+	0	gene_id "SPAC12G12.16c"; transcript_id "SPAC12G12.16c.1"; exon_number "1"; gene_name "SPAC12G12.16c"; gene_source "PomBase"; gene_biotype "protein_coding"; transcript_name "SPAC12G12.16c.1"; transcript_source "PomBase"; transcript_biotype "protein_coding"; protein_id "SPAC12G12.16c.1:pep";
I	PomBase	start_codon	315707	315709	.	+	0	gene_id "SPAC12G12.16c"; transcript_id "SPAC12G12.16c.1"; exon_number "1"; gene_name "SPAC12G12.16c"; gene_source "PomBase"; gene_biotype "protein_coding"; transcript_name "SPAC12G12.16c.1"; transcript_source "PomBase"; transcript_biotype "protein_coding";
I	PomBase	five_prime_utr	315394	315706	.	+	.	gene_id "SPAC12G12.16c"; transcript_id "SPAC12G12.16c.1"; gene_name "SPAC12G12.16c"; gene_source "PomBase"; gene_biotype "protein_coding"; transcript_name "SPAC12G12.16c.1"; transcript_source "PomBase"; transcript_biotype "protein_coding";
I	PomBase	three_prime_utr	317198	317585	.	+	.	gene_id "SPAC12G12.16c"; transcript_id "SPAC12G12.16c.1"; gene_name "SPAC12G12.16c"; gene_source "PomBase"; gene_biotype "protein_coding"; transcript_name "SPAC12G12.16c.1"; transcript_source "PomBase"; transcript_biotype "protein_coding";
I	PomBase	gene	316996	319185	.	-	.	gene_id "SPAC12G12.15"; gene_name "sif3"; gene_source "PomBase"; gene_biotype "protein_coding";
I	PomBase	transcript	316996	319185	.	-	.	gene_id "SPAC12G12.15"; transcript_id "SPAC12G12.15.1"; gene_name "sif3"; gene_source "PomBase"; gene_biotype "protein_coding"; transcript_name "sif3"; transcript_source "PomBase"; transcript_biotype "protein_coding";
I	PomBase	exon	318221	319185	.	-	.	gene_id "SPAC12G12.15"; transcript_id "SPAC12G12.15.1"; exon_number "1"; gene_name "sif3"; gene_source "PomBase"; gene_biotype "protein_coding"; transcript_name "sif3"; transcript_source "PomBase"; transcript_biotype "protein_coding"; exon_id "SPAC12G12.15.1:exon:1";
I	PomBase	CDS	318221	318941	.	-	0	gene_id "SPAC12G12.15"; transcript_id "SPAC12G12.15.1"; exon_number "1"; gene_name "sif3"; gene_source "PomBase"; gene_biotype "protein_coding"; transcript_name "sif3"; transcript_source "PomBase"; transcript_biotype "protein_coding"; protein_id "SPAC12G12.15.1:pep";
I	PomBase	start_codon	318939	318941	.	-	0	gene_id "SPAC12G12.15"; transcript_id "SPAC12G12.15.1"; exon_number "1"; gene_name "sif3"; gene_source "PomBase"; gene_biotype "protein_coding"; transcript_name "sif3"; transcript_source "PomBase"; transcript_biotype "protein_coding";
I	PomBase	exon	317514	318172	.	-	.	gene_id "SPAC12G12.15"; transcript_id "SPAC12G12.15.1"; exon_number "2"; gene_name "sif3"; gene_source "PomBase"; gene_biotype "protein_coding"; transcript_name "sif3"; transcript_source "PomBase"; transcript_biotype "protein_coding"; exon_id "SPAC12G12.15.1:exon:2";
I	PomBase	CDS	317514	318172	.	-	2	gene_id "SPAC12G12.15"; transcript_id "SPAC12G12.15.1"; exon_number "2"; gene_name "sif3"; gene_source "PomBase"; gene_biotype "protein_coding"; transcript_name "sif3"; transcript_source "PomBase"; transcript_biotype "protein_coding"; protein_id "SPAC12G12.15.1:pep";
I	PomBase	exon	316996	317469	.	-	.	gene_id "SPAC12G12.15"; transcript_id "SPAC12G12.15.1"; exon_number "3"; gene_name "sif3"; gene_source "PomBase"; gene_biotype "protein_coding"; transcript_name "sif3"; transcript_source "PomBase"; transcript_biotype "protein_coding"; exon_id "SPAC12G12.15.1:exon:3";
I	PomBase	CDS	317434	317469	.	-	0	gene_id "SPAC12G12.15"; transcript_id "SPAC12G12.15.1"; exon_number "3"; gene_name "sif3"; gene_source "PomBase"; gene_biotype "protein_coding"; transcript_name "sif3"; transcript_source "PomBase"; transcript_biotype "protein_coding"; protein_id "SPAC12G12.15.1:pep";
I	PomBase	stop_codon	317431	317433	.	-	0	gene_id "SPAC12G12.15"; transcript_id "SPAC12G12.15.1"; exon_number "3"; gene_name "sif3"; gene_source "PomBase"; gene_biotype "protein_coding"; transcript_name "sif3"; transcript_source "PomBase"; transcript_biotype "protein_coding";
I	PomBase	five_prime_utr	318942	319185	.	-	.	gene_id "SPAC12G12.15"; transcript_id "SPAC12G12.15.1"; gene_name "sif3"; gene_source "PomBase"; gene_biotype "protein_coding"; transcript_name "sif3"; transcript_source "PomBase"; transcript_biotype "protein_coding";
I	PomBase	three_prime_utr	316996	317430	.	-	.	gene_id "SPAC12G12.15"; transcript_id "SPAC12G12.15.1"; gene_name "sif3"; gene_source "PomBase"; gene_biotype "protein_coding"; transcript_name "sif3"; transcript_source "PomBase"; transcript_biotype "protein_coding";
I	PomBase	gene	317718	319171	.	+	.	gene_id "SPNCRNA.637"; gene_name "sif3-antisense-1"; gene_source "PomBase"; gene_biotype "ncRNA";
I	PomBase	transcript	317718	319171	.	+	.	gene_id "SPNCRNA.637"; transcript_id "SPNCRNA.637.1"; gene_name "sif3-antisense-1"; gene_source "PomBase"; gene_biotype "ncRNA"; transcript_name "sif3-antisense-1"; transcript_source "PomBase"; transcript_biotype "ncRNA";
I	PomBase	exon	317718	319171	.	+	.	gene_id "SPNCRNA.637"; transcript_id "SPNCRNA.637.1"; exon_number "1"; gene_name "sif3-antisense-1"; gene_source "PomBase"; gene_biotype "ncRNA"; transcript_name "sif3-antisense-1"; transcript_source "PomBase"; transcript_biotype "ncRNA"; exon_id "SPNCRNA.637.1:exon:1";
I	PomBase	gene	319815	321825	.	+	.	gene_id "SPAC12G12.14c"; gene_name "pfs2"; gene_source "PomBase"; gene_biotype "protein_coding";
I	PomBase	transcript	319815	321825	.	+	.	gene_id "SPAC12G12.14c"; transcript_id "SPAC12G12.14c.1"; gene_name "pfs2"; gene_source "PomBase"; gene_biotype "protein_coding"; transcript_name "pfs2"; transcript_source "PomBase"; transcript_biotype "protein_coding";
I	PomBase	exon	319815	321825	.	+	.	gene_id "SPAC12G12.14c"; transcript_id "SPAC12G12.14c.1"; exon_number "1"; gene_name "pfs2"; gene_source "PomBase"; gene_biotype "protein_coding"; transcript_name "pfs2"; transcript_source "PomBase"; transcript_biotype "protein_coding"; exon_id "SPAC12G12.14c.1:exon:1";
I	PomBase	CDS	319974	321503	.	+	0	gene_id "SPAC12G12.14c"; transcript_id "SPAC12G12.14c.1"; exon_number "1"; gene_name "pfs2"; gene_source "PomBase"; gene_biotype "protein_coding"; transcript_name "pfs2"; transcript_source "PomBase"; transcript_biotype "protein_coding"; protein_id "SPAC12G12.14c.1:pep";
I	PomBase	start_codon	319974	319976	.	+	0	gene_id "SPAC12G12.14c"; transcript_id "SPAC12G12.14c.1"; exon_number "1"; gene_name "pfs2"; gene_source "PomBase"; gene_biotype "protein_coding"; transcript_name "pfs2"; transcript_source "PomBase"; transcript_biotype "protein_coding";
I	PomBase	five_prime_utr	319815	319973	.	+	.	gene_id "SPAC12G12.14c"; transcript_id "SPAC12G12.14c.1"; gene_name "pfs2"; gene_source "PomBase"; gene_biotype "protein_coding"; transcript_name "pfs2"; transcript_source "PomBase"; transcript_biotype "protein_coding";
I	PomBase	three_prime_utr	321504	321825	.	+	.	gene_id "SPAC12G12.14c"; transcript_id "SPAC12G12.14c.1"; gene_name "pfs2"; gene_source "PomBase"; gene_biotype "protein_coding"; transcript_name "pfs2"; transcript_source "PomBase"; transcript_biotype "protein_coding";
I	PomBase	gene	321764	324129	.	+	.	gene_id "SPAC12G12.13c"; gene_name "cid14"; gene_source "PomBase"; gene_biotype "protein_coding";
I	PomBase	transcript	321764	324129	.	+	.	gene_id "SPAC12G12.13c"; transcript_id "SPAC12G12.13c.1"; gene_name "cid14"; gene_source "PomBase"; gene_biotype "protein_coding"; transcript_name "cid14"; transcript_source "PomBase"; transcript_biotype "protein_coding";
I	PomBase	exon	321764	324129	.	+	.	gene_id "SPAC12G12.13c"; transcript_id "SPAC12G12.13c.1"; exon_number "1"; gene_name "cid14"; gene_source "PomBase"; gene_biotype "protein_coding"; transcript_name "cid14"; transcript_source "PomBase"; transcript_biotype "protein_coding"; exon_id "SPAC12G12.13c.1:exon:1";
I	PomBase	CDS	321924	323978	.	+	0	gene_id "SPAC12G12.13c"; transcript_id "SPAC12G12.13c.1"; exon_number "1"; gene_name "cid14"; gene_source "PomBase"; gene_biotype "protein_coding"; transcript_name "cid14"; transcript_source "PomBase"; transcript_biotype "protein_coding"; protein_id "SPAC12G12.13c.1:pep";
I	PomBase	start_codon	321924	321926	.	+	0	gene_id "SPAC12G12.13c"; transcript_id "SPAC12G12.13c.1"; exon_number "1"; gene_name "cid14"; gene_source "PomBase"; gene_biotype "protein_coding"; transcript_name "cid14"; transcript_source "PomBase"; transcript_biotype "protein_coding";
I	PomBase	five_prime_utr	321764	321923	.	+	.	gene_id "SPAC12G12.13c"; transcript_id "SPAC12G12.13c.1"; gene_name "cid14"; gene_source "PomBase"; gene_biotype "protein_coding"; transcript_name "cid14"; transcript_source "PomBase"; transcript_biotype "protein_coding";
I	PomBase	three_prime_utr	323979	324129	.	+	.	gene_id "SPAC12G12.13c"; transcript_id "SPAC12G12.13c.1"; gene_name "cid14"; gene_source "PomBase"; gene_biotype "protein_coding"; transcript_name "cid14"; transcript_source "PomBase"; transcript_biotype "protein_coding";
I	PomBase	gene	321796	322578	.	-	.	gene_id "SPNCRNA.638"; gene_name "cid14-antisense-1"; gene_source "PomBase"; gene_biotype "ncRNA";
I	PomBase	transcript	321796	322578	.	-	.	gene_id "SPNCRNA.638"; transcript_id "SPNCRNA.638.1"; gene_name "cid14-antisense-1"; gene_source "PomBase"; gene_biotype "ncRNA"; transcript_name "cid14-antisense-1"; transcript_source "PomBase"; transcript_biotype "ncRNA";
I	PomBase	exon	321796	322578	.	-	.	gene_id "SPNCRNA.638"; transcript_id "SPNCRNA.638.1"; exon_number "1"; gene_name "cid14-antisense-1"; gene_source "PomBase"; gene_biotype "ncRNA"; transcript_name "cid14-antisense-1"; transcript_source "PomBase"; transcript_biotype "ncRNA"; exon_id "SPNCRNA.638.1:exon:1";
I	PomBase	gene	324042	325517	.	-	.	gene_id "SPAC12G12.12"; gene_name "gms2"; gene_source "PomBase"; gene_biotype "protein_coding";
I	PomBase	transcript	324042	325517	.	-	.	gene_id "SPAC12G12.12"; transcript_id "SPAC12G12.12.1"; gene_name "gms2"; gene_source "PomBase"; gene_biotype "protein_coding"; transcript_name "gms2"; transcript_source "PomBase"; transcript_biotype "protein_coding";
I	PomBase	exon	325225	325517	.	-	.	gene_id "SPAC12G12.12"; transcript_id "SPAC12G12.12.1"; exon_number "1"; gene_name "gms2"; gene_source "PomBase"; gene_biotype "protein_coding"; transcript_name "gms2"; transcript_source "PomBase"; transcript_biotype "protein_coding"; exon_id "SPAC12G12.12.1:exon:1";
I	PomBase	CDS	325225	325280	.	-	0	gene_id "SPAC12G12.12"; transcript_id "SPAC12G12.12.1"; exon_number "1"; gene_name "gms2"; gene_source "PomBase"; gene_biotype "protein_coding"; transcript_name "gms2"; transcript_source "PomBase"; transcript_biotype "protein_coding"; protein_id "SPAC12G12.12.1:pep";
I	PomBase	start_codon	325278	325280	.	-	0	gene_id "SPAC12G12.12"; transcript_id "SPAC12G12.12.1"; exon_number "1"; gene_name "gms2"; gene_source "PomBase"; gene_biotype "protein_coding"; transcript_name "gms2"; transcript_source "PomBase"; transcript_biotype "protein_coding";
I	PomBase	exon	324462	325166	.	-	.	gene_id "SPAC12G12.12"; transcript_id "SPAC12G12.12.1"; exon_number "2"; gene_name "gms2"; gene_source "PomBase"; gene_biotype "protein_coding"; transcript_name "gms2"; transcript_source "PomBase"; transcript_biotype "protein_coding"; exon_id "SPAC12G12.12.1:exon:2";
I	PomBase	CDS	324462	325166	.	-	1	gene_id "SPAC12G12.12"; transcript_id "SPAC12G12.12.1"; exon_number "2"; gene_name "gms2"; gene_source "PomBase"; gene_biotype "protein_coding"; transcript_name "gms2"; transcript_source "PomBase"; transcript_biotype "protein_coding"; protein_id "SPAC12G12.12.1:pep";
I	PomBase	exon	324042	324407	.	-	.	gene_id "SPAC12G12.12"; transcript_id "SPAC12G12.12.1"; exon_number "3"; gene_name "gms2"; gene_source "PomBase"; gene_biotype "protein_coding"; transcript_name "gms2"; transcript_source "PomBase"; transcript_biotype "protein_coding"; exon_id "SPAC12G12.12.1:exon:3";
I	PomBase	CDS	324194	324407	.	-	1	gene_id "SPAC12G12.12"; transcript_id "SPAC12G12.12.1"; exon_number "3"; gene_name "gms2"; gene_source "PomBase"; gene_biotype "protein_coding"; transcript_name "gms2"; transcript_source "PomBase"; transcript_biotype "protein_coding"; protein_id "SPAC12G12.12.1:pep";
I	PomBase	five_prime_utr	325281	325517	.	-	.	gene_id "SPAC12G12.12"; transcript_id "SPAC12G12.12.1"; gene_name "gms2"; gene_source "PomBase"; gene_biotype "protein_coding"; transcript_name "gms2"; transcript_source "PomBase"; transcript_biotype "protein_coding";
I	PomBase	three_prime_utr	324042	324193	.	-	.	gene_id "SPAC12G12.12"; transcript_id "SPAC12G12.12.1"; gene_name "gms2"; gene_source "PomBase"; gene_biotype "protein_coding"; transcript_name "gms2"; transcript_source "PomBase"; transcript_biotype "protein_coding";
I	PomBase	gene	326440	328122	.	+	.	gene_id "SPAC12G12.11c"; gene_name "SPAC12G12.11c"; gene_source "PomBase"; gene_biotype "protein_coding";
I	PomBase	transcript	326440	328122	.	+	.	gene_id "SPAC12G12.11c"; transcript_id "SPAC12G12.11c.1"; gene_name "SPAC12G12.11c"; gene_source "PomBase"; gene_biotype "protein_coding"; transcript_name "SPAC12G12.11c.1"; transcript_source "PomBase"; transcript_biotype "protein_coding";
I	PomBase	exon	326440	326856	.	+	.	gene_id "SPAC12G12.11c"; transcript_id "SPAC12G12.11c.1"; exon_number "1"; gene_name "SPAC12G12.11c"; gene_source "PomBase"; gene_biotype "protein_coding"; transcript_name "SPAC12G12.11c.1"; transcript_source "PomBase"; transcript_biotype "protein_coding"; exon_id "SPAC12G12.11c.1:exon:1";
I	PomBase	CDS	326694	326856	.	+	0	gene_id "SPAC12G12.11c"; transcript_id "SPAC12G12.11c.1"; exon_number "1"; gene_name "SPAC12G12.11c"; gene_source "PomBase"; gene_biotype "protein_coding"; transcript_name "SPAC12G12.11c.1"; transcript_source "PomBase"; transcript_biotype "protein_coding"; protein_id "SPAC12G12.11c.1:pep";
I	PomBase	start_codon	326694	326696	.	+	0	gene_id "SPAC12G12.11c"; transcript_id "SPAC12G12.11c.1"; exon_number "1"; gene_name "SPAC12G12.11c"; gene_source "PomBase"; gene_biotype "protein_coding"; transcript_name "SPAC12G12.11c.1"; transcript_source "PomBase"; transcript_biotype "protein_coding";
I	PomBase	exon	326942	327391	.	+	.	gene_id "SPAC12G12.11c"; transcript_id "SPAC12G12.11c.1"; exon_number "2"; gene_name "SPAC12G12.11c"; gene_source "PomBase"; gene_biotype "protein_coding"; transcript_name "SPAC12G12.11c.1"; transcript_source "PomBase"; transcript_biotype "protein_coding"; exon_id "SPAC12G12.11c.1:exon:2";
I	PomBase	CDS	326942	327391	.	+	2	gene_id "SPAC12G12.11c"; transcript_id "SPAC12G12.11c.1"; exon_number "2"; gene_name "SPAC12G12.11c"; gene_source "PomBase"; gene_biotype "protein_coding"; transcript_name "SPAC12G12.11c.1"; transcript_source "PomBase"; transcript_biotype "protein_coding"; protein_id "SPAC12G12.11c.1:pep";
I	PomBase	exon	327498	328122	.	+	.	gene_id "SPAC12G12.11c"; transcript_id "SPAC12G12.11c.1"; exon_number "3"; gene_name "SPAC12G12.11c"; gene_source "PomBase"; gene_biotype "protein_coding"; transcript_name "SPAC12G12.11c.1"; transcript_source "PomBase"; transcript_biotype "protein_coding"; exon_id "SPAC12G12.11c.1:exon:3";
I	PomBase	CDS	327498	327982	.	+	2	gene_id "SPAC12G12.11c"; transcript_id "SPAC12G12.11c.1"; exon_number "3"; gene_name "SPAC12G12.11c"; gene_source "PomBase"; gene_biotype "protein_coding"; transcript_name "SPAC12G12.11c.1"; transcript_source "PomBase"; transcript_biotype "protein_coding"; protein_id "SPAC12G12.11c.1:pep";
I	PomBase	five_prime_utr	326440	326693	.	+	.	gene_id "SPAC12G12.11c"; transcript_id "SPAC12G12.11c.1"; gene_name "SPAC12G12.11c"; gene_source "PomBase"; gene_biotype "protein_coding"; transcript_name "SPAC12G12.11c.1"; transcript_source "PomBase"; transcript_biotype "protein_coding";
I	PomBase	three_prime_utr	327983	328122	.	+	.	gene_id "SPAC12G12.11c"; transcript_id "SPAC12G12.11c.1"; gene_name "SPAC12G12.11c"; gene_source "PomBase"; gene_biotype "protein_coding"; transcript_name "SPAC12G12.11c.1"; transcript_source "PomBase"; transcript_biotype "protein_coding";
I	PomBase	gene	328196	329545	.	-	.	gene_id "SPAC12G12.10"; gene_name "wdr21"; gene_source "PomBase"; gene_biotype "protein_coding";
I	PomBase	transcript	328196	329545	.	-	.	gene_id "SPAC12G12.10"; transcript_id "SPAC12G12.10.1"; gene_name "wdr21"; gene_source "PomBase"; gene_biotype "protein_coding"; transcript_name "wdr21"; transcript_source "PomBase"; transcript_biotype "protein_coding";
I	PomBase	exon	328196	329545	.	-	.	gene_id "SPAC12G12.10"; transcript_id "SPAC12G12.10.1"; exon_number "1"; gene_name "wdr21"; gene_source "PomBase"; gene_biotype "protein_coding"; transcript_name "wdr21"; transcript_source "PomBase"; transcript_biotype "protein_coding"; exon_id "SPAC12G12.10.1:exon:1";
I	PomBase	CDS	328222	329484	.	-	0	gene_id "SPAC12G12.10"; transcript_id "SPAC12G12.10.1"; exon_number "1"; gene_name "wdr21"; gene_source "PomBase"; gene_biotype "protein_coding"; transcript_name "wdr21"; transcript_source "PomBase"; transcript_biotype "protein_coding"; protein_id "SPAC12G12.10.1:pep";
I	PomBase	start_codon	329482	329484	.	-	0	gene_id "SPAC12G12.10"; transcript_id "SPAC12G12.10.1"; exon_number "1"; gene_name "wdr21"; gene_source "PomBase"; gene_biotype "protein_coding"; transcript_name "wdr21"; transcript_source "PomBase"; transcript_biotype "protein_coding";
I	PomBase	five_prime_utr	329485	329545	.	-	.	gene_id "SPAC12G12.10"; transcript_id "SPAC12G12.10.1"; gene_name "wdr21"; gene_source "PomBase"; gene_biotype "protein_coding"; transcript_name "wdr21"; transcript_source "PomBase"; transcript_biotype "protein_coding";
I	PomBase	three_prime_utr	328196	328221	.	-	.	gene_id "SPAC12G12.10"; transcript_id "SPAC12G12.10.1"; gene_name "wdr21"; gene_source "PomBase"; gene_biotype "protein_coding"; transcript_name "wdr21"; transcript_source "PomBase"; transcript_biotype "protein_coding";
I	PomBase	gene	329810	332816	.	-	.	gene_id "SPAC12G12.09"; gene_name "eti1"; gene_source "PomBase"; gene_biotype "protein_coding";
I	PomBase	transcript	329810	332816	.	-	.	gene_id "SPAC12G12.09"; transcript_id "SPAC12G12.09.1"; gene_name "eti1"; gene_source "PomBase"; gene_biotype "protein_coding"; transcript_name "eti1"; transcript_source "PomBase"; transcript_biotype "protein_coding";
I	PomBase	exon	329810	332816	.	-	.	gene_id "SPAC12G12.09"; transcript_id "SPAC12G12.09.1"; exon_number "1"; gene_name "eti1"; gene_source "PomBase"; gene_biotype "protein_coding"; transcript_name "eti1"; transcript_source "PomBase"; transcript_biotype "protein_coding"; exon_id "SPAC12G12.09.1:exon:1";
I	PomBase	CDS	329813	332743	.	-	0	gene_id "SPAC12G12.09"; transcript_id "SPAC12G12.09.1"; exon_number "1"; gene_name "eti1"; gene_source "PomBase"; gene_biotype "protein_coding"; transcript_name "eti1"; transcript_source "PomBase"; transcript_biotype "protein_coding"; protein_id "SPAC12G12.09.1:pep";
I	PomBase	start_codon	332741	332743	.	-	0	gene_id "SPAC12G12.09"; transcript_id "SPAC12G12.09.1"; exon_number "1"; gene_name "eti1"; gene_source "PomBase"; gene_biotype "protein_coding"; transcript_name "eti1"; transcript_source "PomBase"; transcript_biotype "protein_coding";
I	PomBase	stop_codon	329810	329812	.	-	0	gene_id "SPAC12G12.09"; transcript_id "SPAC12G12.09.1"; exon_number "1"; gene_name "eti1"; gene_source "PomBase"; gene_biotype "protein_coding"; transcript_name "eti1"; transcript_source "PomBase"; transcript_biotype "protein_coding";
I	PomBase	five_prime_utr	332744	332816	.	-	.	gene_id "SPAC12G12.09"; transcript_id "SPAC12G12.09.1"; gene_name "eti1"; gene_source "PomBase"; gene_biotype "protein_coding"; transcript_name "eti1"; transcript_source "PomBase"; transcript_biotype "protein_coding";
I	PomBase	gene	332838	333578	.	+	.	gene_id "SPAC12G12.17"; gene_name "SPAC12G12.17"; gene_source "PomBase"; gene_biotype "protein_coding";
I	PomBase	transcript	332838	333578	.	+	.	gene_id "SPAC12G12.17"; transcript_id "SPAC12G12.17.1"; gene_name "SPAC12G12.17"; gene_source "PomBase"; gene_biotype "protein_coding"; transcript_name "SPAC12G12.17.1"; transcript_source "PomBase"; transcript_biotype "protein_coding";
I	PomBase	exon	332838	333239	.	+	.	gene_id "SPAC12G12.17"; transcript_id "SPAC12G12.17.1"; exon_number "1"; gene_name "SPAC12G12.17"; gene_source "PomBase"; gene_biotype "protein_coding"; transcript_name "SPAC12G12.17.1"; transcript_source "PomBase"; transcript_biotype "protein_coding"; exon_id "SPAC12G12.17.1:exon:1";
I	PomBase	CDS	333214	333239	.	+	0	gene_id "SPAC12G12.17"; transcript_id "SPAC12G12.17.1"; exon_number "1"; gene_name "SPAC12G12.17"; gene_source "PomBase"; gene_biotype "protein_coding"; transcript_name "SPAC12G12.17.1"; transcript_source "PomBase"; transcript_biotype "protein_coding"; protein_id "SPAC12G12.17.1:pep";
I	PomBase	start_codon	333214	333216	.	+	0	gene_id "SPAC12G12.17"; transcript_id "SPAC12G12.17.1"; exon_number "1"; gene_name "SPAC12G12.17"; gene_source "PomBase"; gene_biotype "protein_coding"; transcript_name "SPAC12G12.17.1"; transcript_source "PomBase"; transcript_biotype "protein_coding";
I	PomBase	exon	333291	333578	.	+	.	gene_id "SPAC12G12.17"; transcript_id "SPAC12G12.17.1"; exon_number "2"; gene_name "SPAC12G12.17"; gene_source "PomBase"; gene_biotype "protein_coding"; transcript_name "SPAC12G12.17.1"; transcript_source "PomBase"; transcript_biotype "protein_coding"; exon_id "SPAC12G12.17.1:exon:2";
I	PomBase	CDS	333291	333441	.	+	1	gene_id "SPAC12G12.17"; transcript_id "SPAC12G12.17.1"; exon_number "2"; gene_name "SPAC12G12.17"; gene_source "PomBase"; gene_biotype "protein_coding"; transcript_name "SPAC12G12.17.1"; transcript_source "PomBase"; transcript_biotype "protein_coding"; protein_id "SPAC12G12.17.1:pep";
I	PomBase	five_prime_utr	332838	333213	.	+	.	gene_id "SPAC12G12.17"; transcript_id "SPAC12G12.17.1"; gene_name "SPAC12G12.17"; gene_source "PomBase"; gene_biotype "protein_coding"; transcript_name "SPAC12G12.17.1"; transcript_source "PomBase"; transcript_biotype "protein_coding";
I	PomBase	three_prime_utr	333442	333578	.	+	.	gene_id "SPAC12G12.17"; transcript_id "SPAC12G12.17.1"; gene_name "SPAC12G12.17"; gene_source "PomBase"; gene_biotype "protein_coding"; transcript_name "SPAC12G12.17.1"; transcript_source "PomBase"; transcript_biotype "protein_coding";
I	PomBase	gene	333178	334621	.	-	.	gene_id "SPAC12G12.08"; gene_name "mrpl1602"; gene_source "PomBase"; gene_biotype "protein_coding";
I	PomBase	transcript	333178	334621	.	-	.	gene_id "SPAC12G12.08"; transcript_id "SPAC12G12.08.1"; gene_name "mrpl1602"; gene_source "PomBase"; gene_biotype "protein_coding"; transcript_name "mrpl1602"; transcript_source "PomBase"; transcript_biotype "protein_coding";
I	PomBase	exon	333178	334621	.	-	.	gene_id "SPAC12G12.08"; transcript_id "SPAC12G12.08.1"; exon_number "1"; gene_name "mrpl1602"; gene_source "PomBase"; gene_biotype "protein_coding"; transcript_name "mrpl1602"; transcript_source "PomBase"; transcript_biotype "protein_coding"; exon_id "SPAC12G12.08.1:exon:1";
I	PomBase	CDS	333695	334336	.	-	0	gene_id "SPAC12G12.08"; transcript_id "SPAC12G12.08.1"; exon_number "1"; gene_name "mrpl1602"; gene_source "PomBase"; gene_biotype "protein_coding"; transcript_name "mrpl1602"; transcript_source "PomBase"; transcript_biotype "protein_coding"; protein_id "SPAC12G12.08.1:pep";
I	PomBase	start_codon	334334	334336	.	-	0	gene_id "SPAC12G12.08"; transcript_id "SPAC12G12.08.1"; exon_number "1"; gene_name "mrpl1602"; gene_source "PomBase"; gene_biotype "protein_coding"; transcript_name "mrpl1602"; transcript_source "PomBase"; transcript_biotype "protein_coding";
I	PomBase	five_prime_utr	334337	334621	.	-	.	gene_id "SPAC12G12.08"; transcript_id "SPAC12G12.08.1"; gene_name "mrpl1602"; gene_source "PomBase"; gene_biotype "protein_coding"; transcript_name "mrpl1602"; transcript_source "PomBase"; transcript_biotype "protein_coding";
I	PomBase	three_prime_utr	333178	333694	.	-	.	gene_id "SPAC12G12.08"; transcript_id "SPAC12G12.08.1"; gene_name "mrpl1602"; gene_source "PomBase"; gene_biotype "protein_coding"; transcript_name "mrpl1602"; transcript_source "PomBase"; transcript_biotype "protein_coding";
I	PomBase	gene	334615	336131	.	+	.	gene_id "SPAC12G12.07c"; gene_name "SPAC12G12.07c"; gene_source "PomBase"; gene_biotype "protein_coding";
I	PomBase	transcript	334615	336131	.	+	.	gene_id "SPAC12G12.07c"; transcript_id "SPAC12G12.07c.1"; gene_name "SPAC12G12.07c"; gene_source "PomBase"; gene_biotype "protein_coding"; transcript_name "SPAC12G12.07c.1"; transcript_source "PomBase"; transcript_biotype "protein_coding";
I	PomBase	exon	334615	334782	.	+	.	gene_id "SPAC12G12.07c"; transcript_id "SPAC12G12.07c.1"; exon_number "1"; gene_name "SPAC12G12.07c"; gene_source "PomBase"; gene_biotype "protein_coding"; transcript_name "SPAC12G12.07c.1"; transcript_source "PomBase"; transcript_biotype "protein_coding"; exon_id "SPAC12G12.07c.1:exon:1";
I	PomBase	CDS	334660	334782	.	+	0	gene_id "SPAC12G12.07c"; transcript_id "SPAC12G12.07c.1"; exon_number "1"; gene_name "SPAC12G12.07c"; gene_source "PomBase"; gene_biotype "protein_coding"; transcript_name "SPAC12G12.07c.1"; transcript_source "PomBase"; transcript_biotype "protein_coding"; protein_id "SPAC12G12.07c.1:pep";
I	PomBase	start_codon	334660	334662	.	+	0	gene_id "SPAC12G12.07c"; transcript_id "SPAC12G12.07c.1"; exon_number "1"; gene_name "SPAC12G12.07c"; gene_source "PomBase"; gene_biotype "protein_coding"; transcript_name "SPAC12G12.07c.1"; transcript_source "PomBase"; transcript_biotype "protein_coding";
I	PomBase	exon	334830	336131	.	+	.	gene_id "SPAC12G12.07c"; transcript_id "SPAC12G12.07c.1"; exon_number "2"; gene_name "SPAC12G12.07c"; gene_source "PomBase"; gene_biotype "protein_coding"; transcript_name "SPAC12G12.07c.1"; transcript_source "PomBase"; transcript_biotype "protein_coding"; exon_id "SPAC12G12.07c.1:exon:2";
I	PomBase	CDS	334830	335942	.	+	0	gene_id "SPAC12G12.07c"; transcript_id "SPAC12G12.07c.1"; exon_number "2"; gene_name "SPAC12G12.07c"; gene_source "PomBase"; gene_biotype "protein_coding"; transcript_name "SPAC12G12.07c.1"; transcript_source "PomBase"; transcript_biotype "protein_coding"; protein_id "SPAC12G12.07c.1:pep";
I	PomBase	stop_codon	335943	335945	.	+	0	gene_id "SPAC12G12.07c"; transcript_id "SPAC12G12.07c.1"; exon_number "2"; gene_name "SPAC12G12.07c"; gene_source "PomBase"; gene_biotype "protein_coding"; transcript_name "SPAC12G12.07c.1"; transcript_source "PomBase"; transcript_biotype "protein_coding";
I	PomBase	five_prime_utr	334615	334659	.	+	.	gene_id "SPAC12G12.07c"; transcript_id "SPAC12G12.07c.1"; gene_name "SPAC12G12.07c"; gene_source "PomBase"; gene_biotype "protein_coding"; transcript_name "SPAC12G12.07c.1"; transcript_source "PomBase"; transcript_biotype "protein_coding";
I	PomBase	three_prime_utr	335946	336131	.	+	.	gene_id "SPAC12G12.07c"; transcript_id "SPAC12G12.07c.1"; gene_name "SPAC12G12.07c"; gene_source "PomBase"; gene_biotype "protein_coding"; transcript_name "SPAC12G12.07c.1"; transcript_source "PomBase"; transcript_biotype "protein_coding";
I	PomBase	gene	336308	338157	.	+	.	gene_id "SPAC12G12.06c"; gene_name "rcl1"; gene_source "PomBase"; gene_biotype "protein_coding";
I	PomBase	transcript	336308	338157	.	+	.	gene_id "SPAC12G12.06c"; transcript_id "SPAC12G12.06c.1"; gene_name "rcl1"; gene_source "PomBase"; gene_biotype "protein_coding"; transcript_name "rcl1"; transcript_source "PomBase"; transcript_biotype "protein_coding";
I	PomBase	exon	336308	338157	.	+	.	gene_id "SPAC12G12.06c"; transcript_id "SPAC12G12.06c.1"; exon_number "1"; gene_name "rcl1"; gene_source "PomBase"; gene_biotype "protein_coding"; transcript_name "rcl1"; transcript_source "PomBase"; transcript_biotype "protein_coding"; exon_id "SPAC12G12.06c.1:exon:1";
I	PomBase	CDS	336428	337519	.	+	0	gene_id "SPAC12G12.06c"; transcript_id "SPAC12G12.06c.1"; exon_number "1"; gene_name "rcl1"; gene_source "PomBase"; gene_biotype "protein_coding"; transcript_name "rcl1"; transcript_source "PomBase"; transcript_biotype "protein_coding"; protein_id "SPAC12G12.06c.1:pep";
I	PomBase	start_codon	336428	336430	.	+	0	gene_id "SPAC12G12.06c"; transcript_id "SPAC12G12.06c.1"; exon_number "1"; gene_name "rcl1"; gene_source "PomBase"; gene_biotype "protein_coding"; transcript_name "rcl1"; transcript_source "PomBase"; transcript_biotype "protein_coding";
I	PomBase	five_prime_utr	336308	336427	.	+	.	gene_id "SPAC12G12.06c"; transcript_id "SPAC12G12.06c.1"; gene_name "rcl1"; gene_source "PomBase"; gene_biotype "protein_coding"; transcript_name "rcl1"; transcript_source "PomBase"; transcript_biotype "protein_coding";
I	PomBase	three_prime_utr	337520	338157	.	+	.	gene_id "SPAC12G12.06c"; transcript_id "SPAC12G12.06c.1"; gene_name "rcl1"; gene_source "PomBase"; gene_biotype "protein_coding"; transcript_name "rcl1"; transcript_source "PomBase"; transcript_biotype "protein_coding";
I	PomBase	gene	338286	339763	.	+	.	gene_id "SPAC12G12.05c"; gene_name "taf9"; gene_source "PomBase"; gene_biotype "protein_coding";
I	PomBase	transcript	338286	339763	.	+	.	gene_id "SPAC12G12.05c"; transcript_id "SPAC12G12.05c.1"; gene_name "taf9"; gene_source "PomBase"; gene_biotype "protein_coding"; transcript_name "taf9"; transcript_source "PomBase"; transcript_biotype "protein_coding";
I	PomBase	exon	338286	339763	.	+	.	gene_id "SPAC12G12.05c"; transcript_id "SPAC12G12.05c.1"; exon_number "1"; gene_name "taf9"; gene_source "PomBase"; gene_biotype "protein_coding"; transcript_name "taf9"; transcript_source "PomBase"; transcript_biotype "protein_coding"; exon_id "SPAC12G12.05c.1:exon:1";
I	PomBase	CDS	338392	338883	.	+	0	gene_id "SPAC12G12.05c"; transcript_id "SPAC12G12.05c.1"; exon_number "1"; gene_name "taf9"; gene_source "PomBase"; gene_biotype "protein_coding"; transcript_name "taf9"; transcript_source "PomBase"; transcript_biotype "protein_coding"; protein_id "SPAC12G12.05c.1:pep";
I	PomBase	start_codon	338392	338394	.	+	0	gene_id "SPAC12G12.05c"; transcript_id "SPAC12G12.05c.1"; exon_number "1"; gene_name "taf9"; gene_source "PomBase"; gene_biotype "protein_coding"; transcript_name "taf9"; transcript_source "PomBase"; transcript_biotype "protein_coding";
I	PomBase	five_prime_utr	338286	338391	.	+	.	gene_id "SPAC12G12.05c"; transcript_id "SPAC12G12.05c.1"; gene_name "taf9"; gene_source "PomBase"; gene_biotype "protein_coding"; transcript_name "taf9"; transcript_source "PomBase"; transcript_biotype "protein_coding";
I	PomBase	three_prime_utr	338884	339763	.	+	.	gene_id "SPAC12G12.05c"; transcript_id "SPAC12G12.05c.1"; gene_name "taf9"; gene_source "PomBase"; gene_biotype "protein_coding"; transcript_name "taf9"; transcript_source "PomBase"; transcript_biotype "protein_coding";
I	PomBase	gene	339548	339642	.	-	.	gene_id "SPSNORNA.29"; gene_name "sno52"; gene_source "PomBase"; gene_biotype "snoRNA";
I	PomBase	transcript	339548	339642	.	-	.	gene_id "SPSNORNA.29"; transcript_id "SPSNORNA.29.1"; gene_name "sno52"; gene_source "PomBase"; gene_biotype "snoRNA"; transcript_name "sno52"; transcript_source "PomBase"; transcript_biotype "snoRNA";
I	PomBase	exon	339548	339642	.	-	.	gene_id "SPSNORNA.29"; transcript_id "SPSNORNA.29.1"; exon_number "1"; gene_name "sno52"; gene_source "PomBase"; gene_biotype "snoRNA"; transcript_name "sno52"; transcript_source "PomBase"; transcript_biotype "snoRNA"; exon_id "SPSNORNA.29.1:exon:1";
I	PomBase	gene	339766	342080	.	-	.	gene_id "SPAC12G12.04"; gene_name "mcp60"; gene_source "PomBase"; gene_biotype "protein_coding";
I	PomBase	transcript	339766	342080	.	-	.	gene_id "SPAC12G12.04"; transcript_id "SPAC12G12.04.1"; gene_name "mcp60"; gene_source "PomBase"; gene_biotype "protein_coding"; transcript_name "mcp60"; transcript_source "PomBase"; transcript_biotype "protein_coding";
I	PomBase	exon	339766	342080	.	-	.	gene_id "SPAC12G12.04"; transcript_id "SPAC12G12.04.1"; exon_number "1"; gene_name "mcp60"; gene_source "PomBase"; gene_biotype "protein_coding"; transcript_name "mcp60"; transcript_source "PomBase"; transcript_biotype "protein_coding"; exon_id "SPAC12G12.04.1:exon:1";
I	PomBase	CDS	340107	341855	.	-	0	gene_id "SPAC12G12.04"; transcript_id "SPAC12G12.04.1"; exon_number "1"; gene_name "mcp60"; gene_source "PomBase"; gene_biotype "protein_coding"; transcript_name "mcp60"; transcript_source "PomBase"; transcript_biotype "protein_coding"; protein_id "SPAC12G12.04.1:pep";
I	PomBase	start_codon	341853	341855	.	-	0	gene_id "SPAC12G12.04"; transcript_id "SPAC12G12.04.1"; exon_number "1"; gene_name "mcp60"; gene_source "PomBase"; gene_biotype "protein_coding"; transcript_name "mcp60"; transcript_source "PomBase"; transcript_biotype "protein_coding";
I	PomBase	five_prime_utr	341856	342080	.	-	.	gene_id "SPAC12G12.04"; transcript_id "SPAC12G12.04.1"; gene_name "mcp60"; gene_source "PomBase"; gene_biotype "protein_coding"; transcript_name "mcp60"; transcript_source "PomBase"; transcript_biotype "protein_coding";
I	PomBase	three_prime_utr	339766	340106	.	-	.	gene_id "SPAC12G12.04"; transcript_id "SPAC12G12.04.1"; gene_name "mcp60"; gene_source "PomBase"; gene_biotype "protein_coding"; transcript_name "mcp60"; transcript_source "PomBase"; transcript_biotype "protein_coding";
I	PomBase	gene	340209	341954	.	+	.	gene_id "SPNCRNA.639"; gene_name "mcp60-antisense-1"; gene_source "PomBase"; gene_biotype "ncRNA";
I	PomBase	transcript	340209	341954	.	+	.	gene_id "SPNCRNA.639"; transcript_id "SPNCRNA.639.1"; gene_name "mcp60-antisense-1"; gene_source "PomBase"; gene_biotype "ncRNA"; transcript_name "mcp60-antisense-1"; transcript_source "PomBase"; transcript_biotype "ncRNA";
I	PomBase	exon	340209	341954	.	+	.	gene_id "SPNCRNA.639"; transcript_id "SPNCRNA.639.1"; exon_number "1"; gene_name "mcp60-antisense-1"; gene_source "PomBase"; gene_biotype "ncRNA"; transcript_name "mcp60-antisense-1"; transcript_source "PomBase"; transcript_biotype "ncRNA"; exon_id "SPNCRNA.639.1:exon:1";
I	PomBase	gene	342090	345182	.	-	.	gene_id "SPAC12G12.03"; gene_name "cip2"; gene_source "PomBase"; gene_biotype "protein_coding";
I	PomBase	transcript	342090	345182	.	-	.	gene_id "SPAC12G12.03"; transcript_id "SPAC12G12.03.1"; gene_name "cip2"; gene_source "PomBase"; gene_biotype "protein_coding"; transcript_name "cip2"; transcript_source "PomBase"; transcript_biotype "protein_coding";
I	PomBase	exon	342090	345182	.	-	.	gene_id "SPAC12G12.03"; transcript_id "SPAC12G12.03.1"; exon_number "1"; gene_name "cip2"; gene_source "PomBase"; gene_biotype "protein_coding"; transcript_name "cip2"; transcript_source "PomBase"; transcript_biotype "protein_coding"; exon_id "SPAC12G12.03.1:exon:1";
I	PomBase	CDS	343399	345129	.	-	0	gene_id "SPAC12G12.03"; transcript_id "SPAC12G12.03.1"; exon_number "1"; gene_name "cip2"; gene_source "PomBase"; gene_biotype "protein_coding"; transcript_name "cip2"; transcript_source "PomBase"; transcript_biotype "protein_coding"; protein_id "SPAC12G12.03.1:pep";
I	PomBase	start_codon	345127	345129	.	-	0	gene_id "SPAC12G12.03"; transcript_id "SPAC12G12.03.1"; exon_number "1"; gene_name "cip2"; gene_source "PomBase"; gene_biotype "protein_coding"; transcript_name "cip2"; transcript_source "PomBase"; transcript_biotype "protein_coding";
I	PomBase	five_prime_utr	345130	345182	.	-	.	gene_id "SPAC12G12.03"; transcript_id "SPAC12G12.03.1"; gene_name "cip2"; gene_source "PomBase"; gene_biotype "protein_coding"; transcript_name "cip2"; transcript_source "PomBase"; transcript_biotype "protein_coding";
I	PomBase	three_prime_utr	342090	343398	.	-	.	gene_id "SPAC12G12.03"; transcript_id "SPAC12G12.03.1"; gene_name "cip2"; gene_source "PomBase"; gene_biotype "protein_coding"; transcript_name "cip2"; transcript_source "PomBase"; transcript_biotype "protein_coding";
I	PomBase	gene	345234	347735	.	-	.	gene_id "SPAC12G12.02"; gene_name "efg1"; gene_source "PomBase"; gene_biotype "protein_coding";
I	PomBase	transcript	345234	347735	.	-	.	gene_id "SPAC12G12.02"; transcript_id "SPAC12G12.02.1"; gene_name "efg1"; gene_source "PomBase"; gene_biotype "protein_coding"; transcript_name "efg1"; transcript_source "PomBase"; transcript_biotype "protein_coding";
I	PomBase	exon	346544	347735	.	-	.	gene_id "SPAC12G12.02"; transcript_id "SPAC12G12.02.1"; exon_number "1"; gene_name "efg1"; gene_source "PomBase"; gene_biotype "protein_coding"; transcript_name "efg1"; transcript_source "PomBase"; transcript_biotype "protein_coding"; exon_id "SPAC12G12.02.1:exon:1";
I	PomBase	CDS	346544	346618	.	-	0	gene_id "SPAC12G12.02"; transcript_id "SPAC12G12.02.1"; exon_number "1"; gene_name "efg1"; gene_source "PomBase"; gene_biotype "protein_coding"; transcript_name "efg1"; transcript_source "PomBase"; transcript_biotype "protein_coding"; protein_id "SPAC12G12.02.1:pep";
I	PomBase	start_codon	346616	346618	.	-	0	gene_id "SPAC12G12.02"; transcript_id "SPAC12G12.02.1"; exon_number "1"; gene_name "efg1"; gene_source "PomBase"; gene_biotype "protein_coding"; transcript_name "efg1"; transcript_source "PomBase"; transcript_biotype "protein_coding";
I	PomBase	exon	346307	346439	.	-	.	gene_id "SPAC12G12.02"; transcript_id "SPAC12G12.02.1"; exon_number "2"; gene_name "efg1"; gene_source "PomBase"; gene_biotype "protein_coding"; transcript_name "efg1"; transcript_source "PomBase"; transcript_biotype "protein_coding"; exon_id "SPAC12G12.02.1:exon:2";
I	PomBase	CDS	346307	346439	.	-	0	gene_id "SPAC12G12.02"; transcript_id "SPAC12G12.02.1"; exon_number "2"; gene_name "efg1"; gene_source "PomBase"; gene_biotype "protein_coding"; transcript_name "efg1"; transcript_source "PomBase"; transcript_biotype "protein_coding"; protein_id "SPAC12G12.02.1:pep";
I	PomBase	exon	346114	346244	.	-	.	gene_id "SPAC12G12.02"; transcript_id "SPAC12G12.02.1"; exon_number "3"; gene_name "efg1"; gene_source "PomBase"; gene_biotype "protein_coding"; transcript_name "efg1"; transcript_source "PomBase"; transcript_biotype "protein_coding"; exon_id "SPAC12G12.02.1:exon:3";
I	PomBase	CDS	346114	346244	.	-	2	gene_id "SPAC12G12.02"; transcript_id "SPAC12G12.02.1"; exon_number "3"; gene_name "efg1"; gene_source "PomBase"; gene_biotype "protein_coding"; transcript_name "efg1"; transcript_source "PomBase"; transcript_biotype "protein_coding"; protein_id "SPAC12G12.02.1:pep";
I	PomBase	exon	345234	346051	.	-	.	gene_id "SPAC12G12.02"; transcript_id "SPAC12G12.02.1"; exon_number "4"; gene_name "efg1"; gene_source "PomBase"; gene_biotype "protein_coding"; transcript_name "efg1"; transcript_source "PomBase"; transcript_biotype "protein_coding"; exon_id "SPAC12G12.02.1:exon:4";
I	PomBase	CDS	345842	346051	.	-	0	gene_id "SPAC12G12.02"; transcript_id "SPAC12G12.02.1"; exon_number "4"; gene_name "efg1"; gene_source "PomBase"; gene_biotype "protein_coding"; transcript_name "efg1"; transcript_source "PomBase"; transcript_biotype "protein_coding"; protein_id "SPAC12G12.02.1:pep";
I	PomBase	stop_codon	345839	345841	.	-	0	gene_id "SPAC12G12.02"; transcript_id "SPAC12G12.02.1"; exon_number "4"; gene_name "efg1"; gene_source "PomBase"; gene_biotype "protein_coding"; transcript_name "efg1"; transcript_source "PomBase"; transcript_biotype "protein_coding";
I	PomBase	five_prime_utr	346619	347735	.	-	.	gene_id "SPAC12G12.02"; transcript_id "SPAC12G12.02.1"; gene_name "efg1"; gene_source "PomBase"; gene_biotype "protein_coding"; transcript_name "efg1"; transcript_source "PomBase"; transcript_biotype "protein_coding";
I	PomBase	three_prime_utr	345234	345838	.	-	.	gene_id "SPAC12G12.02"; transcript_id "SPAC12G12.02.1"; gene_name "efg1"; gene_source "PomBase"; gene_biotype "protein_coding"; transcript_name "efg1"; transcript_source "PomBase"; transcript_biotype "protein_coding";
I	PomBase	gene	345363	346322	.	+	.	gene_id "SPNCRNA.640"; gene_name "efg1-antisense-1"; gene_source "PomBase"; gene_biotype "ncRNA";
I	PomBase	transcript	345363	346322	.	+	.	gene_id "SPNCRNA.640"; transcript_id "SPNCRNA.640.1"; gene_name "efg1-antisense-1"; gene_source "PomBase"; gene_biotype "ncRNA"; transcript_name "efg1-antisense-1"; transcript_source "PomBase"; transcript_biotype "ncRNA";
I	PomBase	exon	345363	346322	.	+	.	gene_id "SPNCRNA.640"; transcript_id "SPNCRNA.640.1"; exon_number "1"; gene_name "efg1-antisense-1"; gene_source "PomBase"; gene_biotype "ncRNA"; transcript_name "efg1-antisense-1"; transcript_source "PomBase"; transcript_biotype "ncRNA"; exon_id "SPNCRNA.640.1:exon:1";
I	PomBase	gene	346795	350151	.	+	.	gene_id "SPAC12G12.01c"; gene_name "sea4"; gene_source "PomBase"; gene_biotype "protein_coding";
I	PomBase	transcript	346795	350151	.	+	.	gene_id "SPAC12G12.01c"; transcript_id "SPAC12G12.01c.1"; gene_name "sea4"; gene_source "PomBase"; gene_biotype "protein_coding"; transcript_name "sea4"; transcript_source "PomBase"; transcript_biotype "protein_coding";
I	PomBase	exon	346795	350151	.	+	.	gene_id "SPAC12G12.01c"; transcript_id "SPAC12G12.01c.1"; exon_number "1"; gene_name "sea4"; gene_source "PomBase"; gene_biotype "protein_coding"; transcript_name "sea4"; transcript_source "PomBase"; transcript_biotype "protein_coding"; exon_id "SPAC12G12.01c.1:exon:1";
I	PomBase	CDS	347195	349912	.	+	0	gene_id "SPAC12G12.01c"; transcript_id "SPAC12G12.01c.1"; exon_number "1"; gene_name "sea4"; gene_source "PomBase"; gene_biotype "protein_coding"; transcript_name "sea4"; transcript_source "PomBase"; transcript_biotype "protein_coding"; protein_id "SPAC12G12.01c.1:pep";
I	PomBase	start_codon	347195	347197	.	+	0	gene_id "SPAC12G12.01c"; transcript_id "SPAC12G12.01c.1"; exon_number "1"; gene_name "sea4"; gene_source "PomBase"; gene_biotype "protein_coding"; transcript_name "sea4"; transcript_source "PomBase"; transcript_biotype "protein_coding";
I	PomBase	five_prime_utr	346795	347194	.	+	.	gene_id "SPAC12G12.01c"; transcript_id "SPAC12G12.01c.1"; gene_name "sea4"; gene_source "PomBase"; gene_biotype "protein_coding"; transcript_name "sea4"; transcript_source "PomBase"; transcript_biotype "protein_coding";
I	PomBase	three_prime_utr	349913	350151	.	+	.	gene_id "SPAC12G12.01c"; transcript_id "SPAC12G12.01c.1"; gene_name "sea4"; gene_source "PomBase"; gene_biotype "protein_coding"; transcript_name "sea4"; transcript_source "PomBase"; transcript_biotype "protein_coding";
I	PomBase	gene	350239	353340	.	-	.	gene_id "SPAC630.04c"; gene_name "SPAC630.04c"; gene_source "PomBase"; gene_biotype "protein_coding";
I	PomBase	transcript	350239	353340	.	-	.	gene_id "SPAC630.04c"; transcript_id "SPAC630.04c.1"; gene_name "SPAC630.04c"; gene_source "PomBase"; gene_biotype "protein_coding"; transcript_name "SPAC630.04c.1"; transcript_source "PomBase"; transcript_biotype "protein_coding";
I	PomBase	exon	350239	353340	.	-	.	gene_id "SPAC630.04c"; transcript_id "SPAC630.04c.1"; exon_number "1"; gene_name "SPAC630.04c"; gene_source "PomBase"; gene_biotype "protein_coding"; transcript_name "SPAC630.04c.1"; transcript_source "PomBase"; transcript_biotype "protein_coding"; exon_id "SPAC630.04c.1:exon:1";
I	PomBase	CDS	352427	352927	.	-	0	gene_id "SPAC630.04c"; transcript_id "SPAC630.04c.1"; exon_number "1"; gene_name "SPAC630.04c"; gene_source "PomBase"; gene_biotype "protein_coding"; transcript_name "SPAC630.04c.1"; transcript_source "PomBase"; transcript_biotype "protein_coding"; protein_id "SPAC630.04c.1:pep";
I	PomBase	start_codon	352925	352927	.	-	0	gene_id "SPAC630.04c"; transcript_id "SPAC630.04c.1"; exon_number "1"; gene_name "SPAC630.04c"; gene_source "PomBase"; gene_biotype "protein_coding"; transcript_name "SPAC630.04c.1"; transcript_source "PomBase"; transcript_biotype "protein_coding";
I	PomBase	five_prime_utr	352928	353340	.	-	.	gene_id "SPAC630.04c"; transcript_id "SPAC630.04c.1"; gene_name "SPAC630.04c"; gene_source "PomBase"; gene_biotype "protein_coding"; transcript_name "SPAC630.04c.1"; transcript_source "PomBase"; transcript_biotype "protein_coding";
I	PomBase	three_prime_utr	350239	352426	.	-	.	gene_id "SPAC630.04c"; transcript_id "SPAC630.04c.1"; gene_name "SPAC630.04c"; gene_source "PomBase"; gene_biotype "protein_coding"; transcript_name "SPAC630.04c.1"; transcript_source "PomBase"; transcript_biotype "protein_coding";
I	PomBase	gene	350406	352296	.	+	.	gene_id "SPAC630.03"; gene_name "arp3"; gene_source "PomBase"; gene_biotype "protein_coding";
I	PomBase	transcript	350406	352296	.	+	.	gene_id "SPAC630.03"; transcript_id "SPAC630.03.1"; gene_name "arp3"; gene_source "PomBase"; gene_biotype "protein_coding"; transcript_name "arp3"; transcript_source "PomBase"; transcript_biotype "protein_coding";
I	PomBase	exon	350406	350511	.	+	.	gene_id "SPAC630.03"; transcript_id "SPAC630.03.1"; exon_number "1"; gene_name "arp3"; gene_source "PomBase"; gene_biotype "protein_coding"; transcript_name "arp3"; transcript_source "PomBase"; transcript_biotype "protein_coding"; exon_id "SPAC630.03.1:exon:1";
I	PomBase	CDS	350477	350511	.	+	0	gene_id "SPAC630.03"; transcript_id "SPAC630.03.1"; exon_number "1"; gene_name "arp3"; gene_source "PomBase"; gene_biotype "protein_coding"; transcript_name "arp3"; transcript_source "PomBase"; transcript_biotype "protein_coding"; protein_id "SPAC630.03.1:pep";
I	PomBase	start_codon	350477	350479	.	+	0	gene_id "SPAC630.03"; transcript_id "SPAC630.03.1"; exon_number "1"; gene_name "arp3"; gene_source "PomBase"; gene_biotype "protein_coding"; transcript_name "arp3"; transcript_source "PomBase"; transcript_biotype "protein_coding";
I	PomBase	exon	350575	350598	.	+	.	gene_id "SPAC630.03"; transcript_id "SPAC630.03.1"; exon_number "2"; gene_name "arp3"; gene_source "PomBase"; gene_biotype "protein_coding"; transcript_name "arp3"; transcript_source "PomBase"; transcript_biotype "protein_coding"; exon_id "SPAC630.03.1:exon:2";
I	PomBase	CDS	350575	350598	.	+	1	gene_id "SPAC630.03"; transcript_id "SPAC630.03.1"; exon_number "2"; gene_name "arp3"; gene_source "PomBase"; gene_biotype "protein_coding"; transcript_name "arp3"; transcript_source "PomBase"; transcript_biotype "protein_coding"; protein_id "SPAC630.03.1:pep";
I	PomBase	exon	350671	351199	.	+	.	gene_id "SPAC630.03"; transcript_id "SPAC630.03.1"; exon_number "3"; gene_name "arp3"; gene_source "PomBase"; gene_biotype "protein_coding"; transcript_name "arp3"; transcript_source "PomBase"; transcript_biotype "protein_coding"; exon_id "SPAC630.03.1:exon:3";
I	PomBase	CDS	350671	351199	.	+	1	gene_id "SPAC630.03"; transcript_id "SPAC630.03.1"; exon_number "3"; gene_name "arp3"; gene_source "PomBase"; gene_biotype "protein_coding"; transcript_name "arp3"; transcript_source "PomBase"; transcript_biotype "protein_coding"; protein_id "SPAC630.03.1:pep";
I	PomBase	exon	351295	351894	.	+	.	gene_id "SPAC630.03"; transcript_id "SPAC630.03.1"; exon_number "4"; gene_name "arp3"; gene_source "PomBase"; gene_biotype "protein_coding"; transcript_name "arp3"; transcript_source "PomBase"; transcript_biotype "protein_coding"; exon_id "SPAC630.03.1:exon:4";
I	PomBase	CDS	351295	351894	.	+	0	gene_id "SPAC630.03"; transcript_id "SPAC630.03.1"; exon_number "4"; gene_name "arp3"; gene_source "PomBase"; gene_biotype "protein_coding"; transcript_name "arp3"; transcript_source "PomBase"; transcript_biotype "protein_coding"; protein_id "SPAC630.03.1:pep";
I	PomBase	exon	351960	352296	.	+	.	gene_id "SPAC630.03"; transcript_id "SPAC630.03.1"; exon_number "5"; gene_name "arp3"; gene_source "PomBase"; gene_biotype "protein_coding"; transcript_name "arp3"; transcript_source "PomBase"; transcript_biotype "protein_coding"; exon_id "SPAC630.03.1:exon:5";
I	PomBase	CDS	351960	352052	.	+	0	gene_id "SPAC630.03"; transcript_id "SPAC630.03.1"; exon_number "5"; gene_name "arp3"; gene_source "PomBase"; gene_biotype "protein_coding"; transcript_name "arp3"; transcript_source "PomBase"; transcript_biotype "protein_coding"; protein_id "SPAC630.03.1:pep";
I	PomBase	stop_codon	352053	352055	.	+	0	gene_id "SPAC630.03"; transcript_id "SPAC630.03.1"; exon_number "5"; gene_name "arp3"; gene_source "PomBase"; gene_biotype "protein_coding"; transcript_name "arp3"; transcript_source "PomBase"; transcript_biotype "protein_coding";
I	PomBase	five_prime_utr	350406	350476	.	+	.	gene_id "SPAC630.03"; transcript_id "SPAC630.03.1"; gene_name "arp3"; gene_source "PomBase"; gene_biotype "protein_coding"; transcript_name "arp3"; transcript_source "PomBase"; transcript_biotype "protein_coding";
I	PomBase	three_prime_utr	352056	352296	.	+	.	gene_id "SPAC630.03"; transcript_id "SPAC630.03.1"; gene_name "arp3"; gene_source "PomBase"; gene_biotype "protein_coding"; transcript_name "arp3"; transcript_source "PomBase"; transcript_biotype "protein_coding";
I	PomBase	gene	353705	357205	.	-	.	gene_id "SPAC630.06c"; gene_name "SPAC630.06c"; gene_source "PomBase"; gene_biotype "protein_coding";
I	PomBase	transcript	353705	357205	.	-	.	gene_id "SPAC630.06c"; transcript_id "SPAC630.06c.1"; gene_name "SPAC630.06c"; gene_source "PomBase"; gene_biotype "protein_coding"; transcript_name "SPAC630.06c.1"; transcript_source "PomBase"; transcript_biotype "protein_coding";
I	PomBase	exon	356984	357205	.	-	.	gene_id "SPAC630.06c"; transcript_id "SPAC630.06c.1"; exon_number "1"; gene_name "SPAC630.06c"; gene_source "PomBase"; gene_biotype "protein_coding"; transcript_name "SPAC630.06c.1"; transcript_source "PomBase"; transcript_biotype "protein_coding"; exon_id "SPAC630.06c.1:exon:1";
I	PomBase	CDS	356984	356997	.	-	0	gene_id "SPAC630.06c"; transcript_id "SPAC630.06c.1"; exon_number "1"; gene_name "SPAC630.06c"; gene_source "PomBase"; gene_biotype "protein_coding"; transcript_name "SPAC630.06c.1"; transcript_source "PomBase"; transcript_biotype "protein_coding"; protein_id "SPAC630.06c.1:pep";
I	PomBase	start_codon	356995	356997	.	-	0	gene_id "SPAC630.06c"; transcript_id "SPAC630.06c.1"; exon_number "1"; gene_name "SPAC630.06c"; gene_source "PomBase"; gene_biotype "protein_coding"; transcript_name "SPAC630.06c.1"; transcript_source "PomBase"; transcript_biotype "protein_coding";
I	PomBase	exon	356635	356904	.	-	.	gene_id "SPAC630.06c"; transcript_id "SPAC630.06c.1"; exon_number "2"; gene_name "SPAC630.06c"; gene_source "PomBase"; gene_biotype "protein_coding"; transcript_name "SPAC630.06c.1"; transcript_source "PomBase"; transcript_biotype "protein_coding"; exon_id "SPAC630.06c.1:exon:2";
I	PomBase	CDS	356635	356904	.	-	1	gene_id "SPAC630.06c"; transcript_id "SPAC630.06c.1"; exon_number "2"; gene_name "SPAC630.06c"; gene_source "PomBase"; gene_biotype "protein_coding"; transcript_name "SPAC630.06c.1"; transcript_source "PomBase"; transcript_biotype "protein_coding"; protein_id "SPAC630.06c.1:pep";
I	PomBase	exon	356511	356592	.	-	.	gene_id "SPAC630.06c"; transcript_id "SPAC630.06c.1"; exon_number "3"; gene_name "SPAC630.06c"; gene_source "PomBase"; gene_biotype "protein_coding"; transcript_name "SPAC630.06c.1"; transcript_source "PomBase"; transcript_biotype "protein_coding"; exon_id "SPAC630.06c.1:exon:3";
I	PomBase	CDS	356511	356592	.	-	1	gene_id "SPAC630.06c"; transcript_id "SPAC630.06c.1"; exon_number "3"; gene_name "SPAC630.06c"; gene_source "PomBase"; gene_biotype "protein_coding"; transcript_name "SPAC630.06c.1"; transcript_source "PomBase"; transcript_biotype "protein_coding"; protein_id "SPAC630.06c.1:pep";
I	PomBase	exon	353705	356433	.	-	.	gene_id "SPAC630.06c"; transcript_id "SPAC630.06c.1"; exon_number "4"; gene_name "SPAC630.06c"; gene_source "PomBase"; gene_biotype "protein_coding"; transcript_name "SPAC630.06c.1"; transcript_source "PomBase"; transcript_biotype "protein_coding"; exon_id "SPAC630.06c.1:exon:4";
I	PomBase	CDS	356236	356433	.	-	0	gene_id "SPAC630.06c"; transcript_id "SPAC630.06c.1"; exon_number "4"; gene_name "SPAC630.06c"; gene_source "PomBase"; gene_biotype "protein_coding"; transcript_name "SPAC630.06c.1"; transcript_source "PomBase"; transcript_biotype "protein_coding"; protein_id "SPAC630.06c.1:pep";
I	PomBase	stop_codon	356233	356235	.	-	0	gene_id "SPAC630.06c"; transcript_id "SPAC630.06c.1"; exon_number "4"; gene_name "SPAC630.06c"; gene_source "PomBase"; gene_biotype "protein_coding"; transcript_name "SPAC630.06c.1"; transcript_source "PomBase"; transcript_biotype "protein_coding";
I	PomBase	five_prime_utr	356998	357205	.	-	.	gene_id "SPAC630.06c"; transcript_id "SPAC630.06c.1"; gene_name "SPAC630.06c"; gene_source "PomBase"; gene_biotype "protein_coding"; transcript_name "SPAC630.06c.1"; transcript_source "PomBase"; transcript_biotype "protein_coding";
I	PomBase	three_prime_utr	353705	356232	.	-	.	gene_id "SPAC630.06c"; transcript_id "SPAC630.06c.1"; gene_name "SPAC630.06c"; gene_source "PomBase"; gene_biotype "protein_coding"; transcript_name "SPAC630.06c.1"; transcript_source "PomBase"; transcript_biotype "protein_coding";
I	PomBase	gene	353783	356580	.	+	.	gene_id "SPAC630.05"; gene_name "gyp7"; gene_source "PomBase"; gene_biotype "protein_coding";
I	PomBase	transcript	353783	356580	.	+	.	gene_id "SPAC630.05"; transcript_id "SPAC630.05.1"; gene_name "gyp7"; gene_source "PomBase"; gene_biotype "protein_coding"; transcript_name "gyp7"; transcript_source "PomBase"; transcript_biotype "protein_coding";
I	PomBase	exon	353783	356580	.	+	.	gene_id "SPAC630.05"; transcript_id "SPAC630.05.1"; exon_number "1"; gene_name "gyp7"; gene_source "PomBase"; gene_biotype "protein_coding"; transcript_name "gyp7"; transcript_source "PomBase"; transcript_biotype "protein_coding"; exon_id "SPAC630.05.1:exon:1";
I	PomBase	CDS	353900	356131	.	+	0	gene_id "SPAC630.05"; transcript_id "SPAC630.05.1"; exon_number "1"; gene_name "gyp7"; gene_source "PomBase"; gene_biotype "protein_coding"; transcript_name "gyp7"; transcript_source "PomBase"; transcript_biotype "protein_coding"; protein_id "SPAC630.05.1:pep";
I	PomBase	start_codon	353900	353902	.	+	0	gene_id "SPAC630.05"; transcript_id "SPAC630.05.1"; exon_number "1"; gene_name "gyp7"; gene_source "PomBase"; gene_biotype "protein_coding"; transcript_name "gyp7"; transcript_source "PomBase"; transcript_biotype "protein_coding";
I	PomBase	five_prime_utr	353783	353899	.	+	.	gene_id "SPAC630.05"; transcript_id "SPAC630.05.1"; gene_name "gyp7"; gene_source "PomBase"; gene_biotype "protein_coding"; transcript_name "gyp7"; transcript_source "PomBase"; transcript_biotype "protein_coding";
I	PomBase	three_prime_utr	356132	356580	.	+	.	gene_id "SPAC630.05"; transcript_id "SPAC630.05.1"; gene_name "gyp7"; gene_source "PomBase"; gene_biotype "protein_coding"; transcript_name "gyp7"; transcript_source "PomBase"; transcript_biotype "protein_coding";
I	PomBase	gene	357325	359228	.	-	.	gene_id "SPAC630.07c"; gene_name "SPAC630.07c"; gene_source "PomBase"; gene_biotype "protein_coding";
I	PomBase	transcript	357325	359228	.	-	.	gene_id "SPAC630.07c"; transcript_id "SPAC630.07c.1"; gene_name "SPAC630.07c"; gene_source "PomBase"; gene_biotype "protein_coding"; transcript_name "SPAC630.07c.1"; transcript_source "PomBase"; transcript_biotype "protein_coding";
I	PomBase	exon	357325	359228	.	-	.	gene_id "SPAC630.07c"; transcript_id "SPAC630.07c.1"; exon_number "1"; gene_name "SPAC630.07c"; gene_source "PomBase"; gene_biotype "protein_coding"; transcript_name "SPAC630.07c.1"; transcript_source "PomBase"; transcript_biotype "protein_coding"; exon_id "SPAC630.07c.1:exon:1";
I	PomBase	CDS	357593	358885	.	-	0	gene_id "SPAC630.07c"; transcript_id "SPAC630.07c.1"; exon_number "1"; gene_name "SPAC630.07c"; gene_source "PomBase"; gene_biotype "protein_coding"; transcript_name "SPAC630.07c.1"; transcript_source "PomBase"; transcript_biotype "protein_coding"; protein_id "SPAC630.07c.1:pep";
I	PomBase	start_codon	358883	358885	.	-	0	gene_id "SPAC630.07c"; transcript_id "SPAC630.07c.1"; exon_number "1"; gene_name "SPAC630.07c"; gene_source "PomBase"; gene_biotype "protein_coding"; transcript_name "SPAC630.07c.1"; transcript_source "PomBase"; transcript_biotype "protein_coding";
I	PomBase	five_prime_utr	358886	359228	.	-	.	gene_id "SPAC630.07c"; transcript_id "SPAC630.07c.1"; gene_name "SPAC630.07c"; gene_source "PomBase"; gene_biotype "protein_coding"; transcript_name "SPAC630.07c.1"; transcript_source "PomBase"; transcript_biotype "protein_coding";
I	PomBase	three_prime_utr	357325	357592	.	-	.	gene_id "SPAC630.07c"; transcript_id "SPAC630.07c.1"; gene_name "SPAC630.07c"; gene_source "PomBase"; gene_biotype "protein_coding"; transcript_name "SPAC630.07c.1"; transcript_source "PomBase"; transcript_biotype "protein_coding";
I	PomBase	gene	358613	359235	.	+	.	gene_id "SPNCRNA.641"; gene_name "SPAC630.07c-antisense-1"; gene_source "PomBase"; gene_biotype "ncRNA";
I	PomBase	transcript	358613	359235	.	+	.	gene_id "SPNCRNA.641"; transcript_id "SPNCRNA.641.1"; gene_name "SPAC630.07c-antisense-1"; gene_source "PomBase"; gene_biotype "ncRNA"; transcript_name "SPAC630.07c-antisense-1"; transcript_source "PomBase"; transcript_biotype "ncRNA";
I	PomBase	exon	358613	359235	.	+	.	gene_id "SPNCRNA.641"; transcript_id "SPNCRNA.641.1"; exon_number "1"; gene_name "SPAC630.07c-antisense-1"; gene_source "PomBase"; gene_biotype "ncRNA"; transcript_name "SPAC630.07c-antisense-1"; transcript_source "PomBase"; transcript_biotype "ncRNA"; exon_id "SPNCRNA.641.1:exon:1";
I	PomBase	gene	359638	361266	.	-	.	gene_id "SPAC630.08c"; gene_name "erg25"; gene_source "PomBase"; gene_biotype "protein_coding";
I	PomBase	transcript	359638	361266	.	-	.	gene_id "SPAC630.08c"; transcript_id "SPAC630.08c.1"; gene_name "erg25"; gene_source "PomBase"; gene_biotype "protein_coding"; transcript_name "erg25"; transcript_source "PomBase"; transcript_biotype "protein_coding";
I	PomBase	exon	359638	361266	.	-	.	gene_id "SPAC630.08c"; transcript_id "SPAC630.08c.1"; exon_number "1"; gene_name "erg25"; gene_source "PomBase"; gene_biotype "protein_coding"; transcript_name "erg25"; transcript_source "PomBase"; transcript_biotype "protein_coding"; exon_id "SPAC630.08c.1:exon:1";
I	PomBase	CDS	360060	360962	.	-	0	gene_id "SPAC630.08c"; transcript_id "SPAC630.08c.1"; exon_number "1"; gene_name "erg25"; gene_source "PomBase"; gene_biotype "protein_coding"; transcript_name "erg25"; transcript_source "PomBase"; transcript_biotype "protein_coding"; protein_id "SPAC630.08c.1:pep";
I	PomBase	start_codon	360960	360962	.	-	0	gene_id "SPAC630.08c"; transcript_id "SPAC630.08c.1"; exon_number "1"; gene_name "erg25"; gene_source "PomBase"; gene_biotype "protein_coding"; transcript_name "erg25"; transcript_source "PomBase"; transcript_biotype "protein_coding";
I	PomBase	five_prime_utr	360963	361266	.	-	.	gene_id "SPAC630.08c"; transcript_id "SPAC630.08c.1"; gene_name "erg25"; gene_source "PomBase"; gene_biotype "protein_coding"; transcript_name "erg25"; transcript_source "PomBase"; transcript_biotype "protein_coding";
I	PomBase	three_prime_utr	359638	360059	.	-	.	gene_id "SPAC630.08c"; transcript_id "SPAC630.08c.1"; gene_name "erg25"; gene_source "PomBase"; gene_biotype "protein_coding"; transcript_name "erg25"; transcript_source "PomBase"; transcript_biotype "protein_coding";
I	PomBase	gene	361498	362202	.	-	.	gene_id "SPNCRNA.642"; gene_name "mug177-antisense-1"; gene_source "PomBase"; gene_biotype "ncRNA";
I	PomBase	transcript	361498	362202	.	-	.	gene_id "SPNCRNA.642"; transcript_id "SPNCRNA.642.1"; gene_name "mug177-antisense-1"; gene_source "PomBase"; gene_biotype "ncRNA"; transcript_name "mug177-antisense-1"; transcript_source "PomBase"; transcript_biotype "ncRNA";
I	PomBase	exon	361498	362202	.	-	.	gene_id "SPNCRNA.642"; transcript_id "SPNCRNA.642.1"; exon_number "1"; gene_name "mug177-antisense-1"; gene_source "PomBase"; gene_biotype "ncRNA"; transcript_name "mug177-antisense-1"; transcript_source "PomBase"; transcript_biotype "ncRNA"; exon_id "SPNCRNA.642.1:exon:1";
I	PomBase	gene	361557	363654	.	+	.	gene_id "SPAC630.15"; gene_name "mug177"; gene_source "PomBase"; gene_biotype "protein_coding";
I	PomBase	transcript	361557	363654	.	+	.	gene_id "SPAC630.15"; transcript_id "SPAC630.15.1"; gene_name "mug177"; gene_source "PomBase"; gene_biotype "protein_coding"; transcript_name "mug177"; transcript_source "PomBase"; transcript_biotype "protein_coding";
I	PomBase	exon	361557	363654	.	+	.	gene_id "SPAC630.15"; transcript_id "SPAC630.15.1"; exon_number "1"; gene_name "mug177"; gene_source "PomBase"; gene_biotype "protein_coding"; transcript_name "mug177"; transcript_source "PomBase"; transcript_biotype "protein_coding"; exon_id "SPAC630.15.1:exon:1";
I	PomBase	CDS	361557	361874	.	+	0	gene_id "SPAC630.15"; transcript_id "SPAC630.15.1"; exon_number "1"; gene_name "mug177"; gene_source "PomBase"; gene_biotype "protein_coding"; transcript_name "mug177"; transcript_source "PomBase"; transcript_biotype "protein_coding"; protein_id "SPAC630.15.1:pep";
I	PomBase	start_codon	361557	361559	.	+	0	gene_id "SPAC630.15"; transcript_id "SPAC630.15.1"; exon_number "1"; gene_name "mug177"; gene_source "PomBase"; gene_biotype "protein_coding"; transcript_name "mug177"; transcript_source "PomBase"; transcript_biotype "protein_coding";
I	PomBase	three_prime_utr	361875	363654	.	+	.	gene_id "SPAC630.15"; transcript_id "SPAC630.15.1"; gene_name "mug177"; gene_source "PomBase"; gene_biotype "protein_coding"; transcript_name "mug177"; transcript_source "PomBase"; transcript_biotype "protein_coding";
I	PomBase	gene	362248	363714	.	-	.	gene_id "SPAC630.09c"; gene_name "mug58"; gene_source "PomBase"; gene_biotype "protein_coding";
I	PomBase	transcript	362248	363714	.	-	.	gene_id "SPAC630.09c"; transcript_id "SPAC630.09c.1"; gene_name "mug58"; gene_source "PomBase"; gene_biotype "protein_coding"; transcript_name "mug58"; transcript_source "PomBase"; transcript_biotype "protein_coding";
I	PomBase	exon	362248	363714	.	-	.	gene_id "SPAC630.09c"; transcript_id "SPAC630.09c.1"; exon_number "1"; gene_name "mug58"; gene_source "PomBase"; gene_biotype "protein_coding"; transcript_name "mug58"; transcript_source "PomBase"; transcript_biotype "protein_coding"; exon_id "SPAC630.09c.1:exon:1";
I	PomBase	CDS	362769	363602	.	-	0	gene_id "SPAC630.09c"; transcript_id "SPAC630.09c.1"; exon_number "1"; gene_name "mug58"; gene_source "PomBase"; gene_biotype "protein_coding"; transcript_name "mug58"; transcript_source "PomBase"; transcript_biotype "protein_coding"; protein_id "SPAC630.09c.1:pep";
I	PomBase	start_codon	363600	363602	.	-	0	gene_id "SPAC630.09c"; transcript_id "SPAC630.09c.1"; exon_number "1"; gene_name "mug58"; gene_source "PomBase"; gene_biotype "protein_coding"; transcript_name "mug58"; transcript_source "PomBase"; transcript_biotype "protein_coding";
I	PomBase	five_prime_utr	363603	363714	.	-	.	gene_id "SPAC630.09c"; transcript_id "SPAC630.09c.1"; gene_name "mug58"; gene_source "PomBase"; gene_biotype "protein_coding"; transcript_name "mug58"; transcript_source "PomBase"; transcript_biotype "protein_coding";
I	PomBase	three_prime_utr	362248	362768	.	-	.	gene_id "SPAC630.09c"; transcript_id "SPAC630.09c.1"; gene_name "mug58"; gene_source "PomBase"; gene_biotype "protein_coding"; transcript_name "mug58"; transcript_source "PomBase"; transcript_biotype "protein_coding";
I	PomBase	gene	365155	365226	.	+	.	gene_id "SPATRNAPRO.01"; gene_name "SPATRNAPRO.01"; gene_source "PomBase"; gene_biotype "tRNA";
I	PomBase	transcript	365155	365226	.	+	.	gene_id "SPATRNAPRO.01"; transcript_id "SPATRNAPRO.01.1"; gene_name "SPATRNAPRO.01"; gene_source "PomBase"; gene_biotype "tRNA"; transcript_name "SPATRNAPRO.01.1"; transcript_source "PomBase"; transcript_biotype "tRNA";
I	PomBase	exon	365155	365226	.	+	.	gene_id "SPATRNAPRO.01"; transcript_id "SPATRNAPRO.01.1"; exon_number "1"; gene_name "SPATRNAPRO.01"; gene_source "PomBase"; gene_biotype "tRNA"; transcript_name "SPATRNAPRO.01.1"; transcript_source "PomBase"; transcript_biotype "tRNA"; exon_id "SPATRNAPRO.01.1:exon:1";
I	PomBase	gene	365204	366442	.	+	.	gene_id "SPAC630.10"; gene_name "bmt2"; gene_source "PomBase"; gene_biotype "protein_coding";
I	PomBase	transcript	365204	366442	.	+	.	gene_id "SPAC630.10"; transcript_id "SPAC630.10.1"; gene_name "bmt2"; gene_source "PomBase"; gene_biotype "protein_coding"; transcript_name "bmt2"; transcript_source "PomBase"; transcript_biotype "protein_coding";
I	PomBase	exon	365204	366442	.	+	.	gene_id "SPAC630.10"; transcript_id "SPAC630.10.1"; exon_number "1"; gene_name "bmt2"; gene_source "PomBase"; gene_biotype "protein_coding"; transcript_name "bmt2"; transcript_source "PomBase"; transcript_biotype "protein_coding"; exon_id "SPAC630.10.1:exon:1";
I	PomBase	CDS	365550	366362	.	+	0	gene_id "SPAC630.10"; transcript_id "SPAC630.10.1"; exon_number "1"; gene_name "bmt2"; gene_source "PomBase"; gene_biotype "protein_coding"; transcript_name "bmt2"; transcript_source "PomBase"; transcript_biotype "protein_coding"; protein_id "SPAC630.10.1:pep";
I	PomBase	start_codon	365550	365552	.	+	0	gene_id "SPAC630.10"; transcript_id "SPAC630.10.1"; exon_number "1"; gene_name "bmt2"; gene_source "PomBase"; gene_biotype "protein_coding"; transcript_name "bmt2"; transcript_source "PomBase"; transcript_biotype "protein_coding";
I	PomBase	five_prime_utr	365204	365549	.	+	.	gene_id "SPAC630.10"; transcript_id "SPAC630.10.1"; gene_name "bmt2"; gene_source "PomBase"; gene_biotype "protein_coding"; transcript_name "bmt2"; transcript_source "PomBase"; transcript_biotype "protein_coding";
I	PomBase	three_prime_utr	366363	366442	.	+	.	gene_id "SPAC630.10"; transcript_id "SPAC630.10.1"; gene_name "bmt2"; gene_source "PomBase"; gene_biotype "protein_coding"; transcript_name "bmt2"; transcript_source "PomBase"; transcript_biotype "protein_coding";
I	PomBase	gene	366634	367890	.	+	.	gene_id "SPAC630.11"; gene_name "vps55"; gene_source "PomBase"; gene_biotype "protein_coding";
I	PomBase	transcript	366634	367890	.	+	.	gene_id "SPAC630.11"; transcript_id "SPAC630.11.1"; gene_name "vps55"; gene_source "PomBase"; gene_biotype "protein_coding"; transcript_name "vps55"; transcript_source "PomBase"; transcript_biotype "protein_coding";
I	PomBase	exon	366634	366817	.	+	.	gene_id "SPAC630.11"; transcript_id "SPAC630.11.1"; exon_number "1"; gene_name "vps55"; gene_source "PomBase"; gene_biotype "protein_coding"; transcript_name "vps55"; transcript_source "PomBase"; transcript_biotype "protein_coding"; exon_id "SPAC630.11.1:exon:1";
I	PomBase	CDS	366801	366817	.	+	0	gene_id "SPAC630.11"; transcript_id "SPAC630.11.1"; exon_number "1"; gene_name "vps55"; gene_source "PomBase"; gene_biotype "protein_coding"; transcript_name "vps55"; transcript_source "PomBase"; transcript_biotype "protein_coding"; protein_id "SPAC630.11.1:pep";
I	PomBase	start_codon	366801	366803	.	+	0	gene_id "SPAC630.11"; transcript_id "SPAC630.11.1"; exon_number "1"; gene_name "vps55"; gene_source "PomBase"; gene_biotype "protein_coding"; transcript_name "vps55"; transcript_source "PomBase"; transcript_biotype "protein_coding";
I	PomBase	exon	366873	366891	.	+	.	gene_id "SPAC630.11"; transcript_id "SPAC630.11.1"; exon_number "2"; gene_name "vps55"; gene_source "PomBase"; gene_biotype "protein_coding"; transcript_name "vps55"; transcript_source "PomBase"; transcript_biotype "protein_coding"; exon_id "SPAC630.11.1:exon:2";
I	PomBase	CDS	366873	366891	.	+	1	gene_id "SPAC630.11"; transcript_id "SPAC630.11.1"; exon_number "2"; gene_name "vps55"; gene_source "PomBase"; gene_biotype "protein_coding"; transcript_name "vps55"; transcript_source "PomBase"; transcript_biotype "protein_coding"; protein_id "SPAC630.11.1:pep";
I	PomBase	exon	366968	367040	.	+	.	gene_id "SPAC630.11"; transcript_id "SPAC630.11.1"; exon_number "3"; gene_name "vps55"; gene_source "PomBase"; gene_biotype "protein_coding"; transcript_name "vps55"; transcript_source "PomBase"; transcript_biotype "protein_coding"; exon_id "SPAC630.11.1:exon:3";
I	PomBase	CDS	366968	367040	.	+	0	gene_id "SPAC630.11"; transcript_id "SPAC630.11.1"; exon_number "3"; gene_name "vps55"; gene_source "PomBase"; gene_biotype "protein_coding"; transcript_name "vps55"; transcript_source "PomBase"; transcript_biotype "protein_coding"; protein_id "SPAC630.11.1:pep";
I	PomBase	exon	367105	367189	.	+	.	gene_id "SPAC630.11"; transcript_id "SPAC630.11.1"; exon_number "4"; gene_name "vps55"; gene_source "PomBase"; gene_biotype "protein_coding"; transcript_name "vps55"; transcript_source "PomBase"; transcript_biotype "protein_coding"; exon_id "SPAC630.11.1:exon:4";
I	PomBase	CDS	367105	367189	.	+	2	gene_id "SPAC630.11"; transcript_id "SPAC630.11.1"; exon_number "4"; gene_name "vps55"; gene_source "PomBase"; gene_biotype "protein_coding"; transcript_name "vps55"; transcript_source "PomBase"; transcript_biotype "protein_coding"; protein_id "SPAC630.11.1:pep";
I	PomBase	exon	367293	367348	.	+	.	gene_id "SPAC630.11"; transcript_id "SPAC630.11.1"; exon_number "5"; gene_name "vps55"; gene_source "PomBase"; gene_biotype "protein_coding"; transcript_name "vps55"; transcript_source "PomBase"; transcript_biotype "protein_coding"; exon_id "SPAC630.11.1:exon:5";
I	PomBase	CDS	367293	367348	.	+	1	gene_id "SPAC630.11"; transcript_id "SPAC630.11.1"; exon_number "5"; gene_name "vps55"; gene_source "PomBase"; gene_biotype "protein_coding"; transcript_name "vps55"; transcript_source "PomBase"; transcript_biotype "protein_coding"; protein_id "SPAC630.11.1:pep";
I	PomBase	exon	367395	367890	.	+	.	gene_id "SPAC630.11"; transcript_id "SPAC630.11.1"; exon_number "6"; gene_name "vps55"; gene_source "PomBase"; gene_biotype "protein_coding"; transcript_name "vps55"; transcript_source "PomBase"; transcript_biotype "protein_coding"; exon_id "SPAC630.11.1:exon:6";
I	PomBase	CDS	367395	367531	.	+	2	gene_id "SPAC630.11"; transcript_id "SPAC630.11.1"; exon_number "6"; gene_name "vps55"; gene_source "PomBase"; gene_biotype "protein_coding"; transcript_name "vps55"; transcript_source "PomBase"; transcript_biotype "protein_coding"; protein_id "SPAC630.11.1:pep";
I	PomBase	five_prime_utr	366634	366800	.	+	.	gene_id "SPAC630.11"; transcript_id "SPAC630.11.1"; gene_name "vps55"; gene_source "PomBase"; gene_biotype "protein_coding"; transcript_name "vps55"; transcript_source "PomBase"; transcript_biotype "protein_coding";
I	PomBase	three_prime_utr	367532	367890	.	+	.	gene_id "SPAC630.11"; transcript_id "SPAC630.11.1"; gene_name "vps55"; gene_source "PomBase"; gene_biotype "protein_coding"; transcript_name "vps55"; transcript_source "PomBase"; transcript_biotype "protein_coding";
I	PomBase	gene	368040	369950	.	+	.	gene_id "SPAC630.12"; gene_name "SPAC630.12"; gene_source "PomBase"; gene_biotype "protein_coding";
I	PomBase	transcript	368040	369950	.	+	.	gene_id "SPAC630.12"; transcript_id "SPAC630.12.1"; gene_name "SPAC630.12"; gene_source "PomBase"; gene_biotype "protein_coding"; transcript_name "SPAC630.12.1"; transcript_source "PomBase"; transcript_biotype "protein_coding";
I	PomBase	exon	368040	369950	.	+	.	gene_id "SPAC630.12"; transcript_id "SPAC630.12.1"; exon_number "1"; gene_name "SPAC630.12"; gene_source "PomBase"; gene_biotype "protein_coding"; transcript_name "SPAC630.12.1"; transcript_source "PomBase"; transcript_biotype "protein_coding"; exon_id "SPAC630.12.1:exon:1";
I	PomBase	CDS	368572	369840	.	+	0	gene_id "SPAC630.12"; transcript_id "SPAC630.12.1"; exon_number "1"; gene_name "SPAC630.12"; gene_source "PomBase"; gene_biotype "protein_coding"; transcript_name "SPAC630.12.1"; transcript_source "PomBase"; transcript_biotype "protein_coding"; protein_id "SPAC630.12.1:pep";
I	PomBase	start_codon	368572	368574	.	+	0	gene_id "SPAC630.12"; transcript_id "SPAC630.12.1"; exon_number "1"; gene_name "SPAC630.12"; gene_source "PomBase"; gene_biotype "protein_coding"; transcript_name "SPAC630.12.1"; transcript_source "PomBase"; transcript_biotype "protein_coding";
I	PomBase	five_prime_utr	368040	368571	.	+	.	gene_id "SPAC630.12"; transcript_id "SPAC630.12.1"; gene_name "SPAC630.12"; gene_source "PomBase"; gene_biotype "protein_coding"; transcript_name "SPAC630.12.1"; transcript_source "PomBase"; transcript_biotype "protein_coding";
I	PomBase	three_prime_utr	369841	369950	.	+	.	gene_id "SPAC630.12"; transcript_id "SPAC630.12.1"; gene_name "SPAC630.12"; gene_source "PomBase"; gene_biotype "protein_coding"; transcript_name "SPAC630.12.1"; transcript_source "PomBase"; transcript_biotype "protein_coding";
I	PomBase	gene	369791	374217	.	-	.	gene_id "SPAC630.13c"; gene_name "tsc2"; gene_source "PomBase"; gene_biotype "protein_coding";
I	PomBase	transcript	369791	374217	.	-	.	gene_id "SPAC630.13c"; transcript_id "SPAC630.13c.1"; gene_name "tsc2"; gene_source "PomBase"; gene_biotype "protein_coding"; transcript_name "tsc2"; transcript_source "PomBase"; transcript_biotype "protein_coding";
I	PomBase	exon	369791	374217	.	-	.	gene_id "SPAC630.13c"; transcript_id "SPAC630.13c.1"; exon_number "1"; gene_name "tsc2"; gene_source "PomBase"; gene_biotype "protein_coding"; transcript_name "tsc2"; transcript_source "PomBase"; transcript_biotype "protein_coding"; exon_id "SPAC630.13c.1:exon:1";
I	PomBase	CDS	369945	373964	.	-	0	gene_id "SPAC630.13c"; transcript_id "SPAC630.13c.1"; exon_number "1"; gene_name "tsc2"; gene_source "PomBase"; gene_biotype "protein_coding"; transcript_name "tsc2"; transcript_source "PomBase"; transcript_biotype "protein_coding"; protein_id "SPAC630.13c.1:pep";
I	PomBase	start_codon	373962	373964	.	-	0	gene_id "SPAC630.13c"; transcript_id "SPAC630.13c.1"; exon_number "1"; gene_name "tsc2"; gene_source "PomBase"; gene_biotype "protein_coding"; transcript_name "tsc2"; transcript_source "PomBase"; transcript_biotype "protein_coding";
I	PomBase	five_prime_utr	373965	374217	.	-	.	gene_id "SPAC630.13c"; transcript_id "SPAC630.13c.1"; gene_name "tsc2"; gene_source "PomBase"; gene_biotype "protein_coding"; transcript_name "tsc2"; transcript_source "PomBase"; transcript_biotype "protein_coding";
I	PomBase	three_prime_utr	369791	369944	.	-	.	gene_id "SPAC630.13c"; transcript_id "SPAC630.13c.1"; gene_name "tsc2"; gene_source "PomBase"; gene_biotype "protein_coding"; transcript_name "tsc2"; transcript_source "PomBase"; transcript_biotype "protein_coding";
I	PomBase	gene	374316	377908	.	-	.	gene_id "SPAC630.14c"; gene_name "tup12"; gene_source "PomBase"; gene_biotype "protein_coding";
I	PomBase	transcript	374316	377908	.	-	.	gene_id "SPAC630.14c"; transcript_id "SPAC630.14c.1"; gene_name "tup12"; gene_source "PomBase"; gene_biotype "protein_coding"; transcript_name "tup12"; transcript_source "PomBase"; transcript_biotype "protein_coding";
I	PomBase	exon	376993	377908	.	-	.	gene_id "SPAC630.14c"; transcript_id "SPAC630.14c.1"; exon_number "1"; gene_name "tup12"; gene_source "PomBase"; gene_biotype "protein_coding"; transcript_name "tup12"; transcript_source "PomBase"; transcript_biotype "protein_coding"; exon_id "SPAC630.14c.1:exon:1";
I	PomBase	CDS	376993	377200	.	-	0	gene_id "SPAC630.14c"; transcript_id "SPAC630.14c.1"; exon_number "1"; gene_name "tup12"; gene_source "PomBase"; gene_biotype "protein_coding"; transcript_name "tup12"; transcript_source "PomBase"; transcript_biotype "protein_coding"; protein_id "SPAC630.14c.1:pep";
I	PomBase	start_codon	377198	377200	.	-	0	gene_id "SPAC630.14c"; transcript_id "SPAC630.14c.1"; exon_number "1"; gene_name "tup12"; gene_source "PomBase"; gene_biotype "protein_coding"; transcript_name "tup12"; transcript_source "PomBase"; transcript_biotype "protein_coding";
I	PomBase	exon	376844	376931	.	-	.	gene_id "SPAC630.14c"; transcript_id "SPAC630.14c.1"; exon_number "2"; gene_name "tup12"; gene_source "PomBase"; gene_biotype "protein_coding"; transcript_name "tup12"; transcript_source "PomBase"; transcript_biotype "protein_coding"; exon_id "SPAC630.14c.1:exon:2";
I	PomBase	CDS	376844	376931	.	-	2	gene_id "SPAC630.14c"; transcript_id "SPAC630.14c.1"; exon_number "2"; gene_name "tup12"; gene_source "PomBase"; gene_biotype "protein_coding"; transcript_name "tup12"; transcript_source "PomBase"; transcript_biotype "protein_coding"; protein_id "SPAC630.14c.1:pep";
I	PomBase	exon	376094	376446	.	-	.	gene_id "SPAC630.14c"; transcript_id "SPAC630.14c.1"; exon_number "3"; gene_name "tup12"; gene_source "PomBase"; gene_biotype "protein_coding"; transcript_name "tup12"; transcript_source "PomBase"; transcript_biotype "protein_coding"; exon_id "SPAC630.14c.1:exon:3";
I	PomBase	CDS	376094	376446	.	-	1	gene_id "SPAC630.14c"; transcript_id "SPAC630.14c.1"; exon_number "3"; gene_name "tup12"; gene_source "PomBase"; gene_biotype "protein_coding"; transcript_name "tup12"; transcript_source "PomBase"; transcript_biotype "protein_coding"; protein_id "SPAC630.14c.1:pep";
I	PomBase	exon	374316	375830	.	-	.	gene_id "SPAC630.14c"; transcript_id "SPAC630.14c.1"; exon_number "4"; gene_name "tup12"; gene_source "PomBase"; gene_biotype "protein_coding"; transcript_name "tup12"; transcript_source "PomBase"; transcript_biotype "protein_coding"; exon_id "SPAC630.14c.1:exon:4";
I	PomBase	CDS	374683	375830	.	-	2	gene_id "SPAC630.14c"; transcript_id "SPAC630.14c.1"; exon_number "4"; gene_name "tup12"; gene_source "PomBase"; gene_biotype "protein_coding"; transcript_name "tup12"; transcript_source "PomBase"; transcript_biotype "protein_coding"; protein_id "SPAC630.14c.1:pep";
I	PomBase	five_prime_utr	377201	377908	.	-	.	gene_id "SPAC630.14c"; transcript_id "SPAC630.14c.1"; gene_name "tup12"; gene_source "PomBase"; gene_biotype "protein_coding"; transcript_name "tup12"; transcript_source "PomBase"; transcript_biotype "protein_coding";
I	PomBase	three_prime_utr	374316	374682	.	-	.	gene_id "SPAC630.14c"; transcript_id "SPAC630.14c.1"; gene_name "tup12"; gene_source "PomBase"; gene_biotype "protein_coding"; transcript_name "tup12"; transcript_source "PomBase"; transcript_biotype "protein_coding";
I	PomBase	gene	377844	384751	.	-	.	gene_id "SPAC1751.01c"; gene_name "gti1"; gene_source "PomBase"; gene_biotype "protein_coding";
I	PomBase	transcript	377844	384751	.	-	.	gene_id "SPAC1751.01c"; transcript_id "SPAC1751.01c.1"; gene_name "gti1"; gene_source "PomBase"; gene_biotype "protein_coding"; transcript_name "gti1"; transcript_source "PomBase"; transcript_biotype "protein_coding";
I	PomBase	exon	377844	384751	.	-	.	gene_id "SPAC1751.01c"; transcript_id "SPAC1751.01c.1"; exon_number "1"; gene_name "gti1"; gene_source "PomBase"; gene_biotype "protein_coding"; transcript_name "gti1"; transcript_source "PomBase"; transcript_biotype "protein_coding"; exon_id "SPAC1751.01c.1:exon:1";
I	PomBase	CDS	378195	380354	.	-	0	gene_id "SPAC1751.01c"; transcript_id "SPAC1751.01c.1"; exon_number "1"; gene_name "gti1"; gene_source "PomBase"; gene_biotype "protein_coding"; transcript_name "gti1"; transcript_source "PomBase"; transcript_biotype "protein_coding"; protein_id "SPAC1751.01c.1:pep";
I	PomBase	start_codon	380352	380354	.	-	0	gene_id "SPAC1751.01c"; transcript_id "SPAC1751.01c.1"; exon_number "1"; gene_name "gti1"; gene_source "PomBase"; gene_biotype "protein_coding"; transcript_name "gti1"; transcript_source "PomBase"; transcript_biotype "protein_coding";
I	PomBase	stop_codon	378192	378194	.	-	0	gene_id "SPAC1751.01c"; transcript_id "SPAC1751.01c.1"; exon_number "1"; gene_name "gti1"; gene_source "PomBase"; gene_biotype "protein_coding"; transcript_name "gti1"; transcript_source "PomBase"; transcript_biotype "protein_coding";
I	PomBase	five_prime_utr	380355	384751	.	-	.	gene_id "SPAC1751.01c"; transcript_id "SPAC1751.01c.1"; gene_name "gti1"; gene_source "PomBase"; gene_biotype "protein_coding"; transcript_name "gti1"; transcript_source "PomBase"; transcript_biotype "protein_coding";
I	PomBase	three_prime_utr	377844	378191	.	-	.	gene_id "SPAC1751.01c"; transcript_id "SPAC1751.01c.1"; gene_name "gti1"; gene_source "PomBase"; gene_biotype "protein_coding"; transcript_name "gti1"; transcript_source "PomBase"; transcript_biotype "protein_coding";
I	PomBase	gene	383580	385433	.	+	.	gene_id "SPAC1751.04"; gene_name "loc1"; gene_source "PomBase"; gene_biotype "protein_coding";
I	PomBase	transcript	383580	385433	.	+	.	gene_id "SPAC1751.04"; transcript_id "SPAC1751.04.1"; gene_name "loc1"; gene_source "PomBase"; gene_biotype "protein_coding"; transcript_name "loc1"; transcript_source "PomBase"; transcript_biotype "protein_coding";
I	PomBase	exon	383580	384349	.	+	.	gene_id "SPAC1751.04"; transcript_id "SPAC1751.04.1"; exon_number "1"; gene_name "loc1"; gene_source "PomBase"; gene_biotype "protein_coding"; transcript_name "loc1"; transcript_source "PomBase"; transcript_biotype "protein_coding"; exon_id "SPAC1751.04.1:exon:1";
I	PomBase	CDS	384320	384349	.	+	0	gene_id "SPAC1751.04"; transcript_id "SPAC1751.04.1"; exon_number "1"; gene_name "loc1"; gene_source "PomBase"; gene_biotype "protein_coding"; transcript_name "loc1"; transcript_source "PomBase"; transcript_biotype "protein_coding"; protein_id "SPAC1751.04.1:pep";
I	PomBase	start_codon	384320	384322	.	+	0	gene_id "SPAC1751.04"; transcript_id "SPAC1751.04.1"; exon_number "1"; gene_name "loc1"; gene_source "PomBase"; gene_biotype "protein_coding"; transcript_name "loc1"; transcript_source "PomBase"; transcript_biotype "protein_coding";
I	PomBase	exon	384480	384590	.	+	.	gene_id "SPAC1751.04"; transcript_id "SPAC1751.04.1"; exon_number "2"; gene_name "loc1"; gene_source "PomBase"; gene_biotype "protein_coding"; transcript_name "loc1"; transcript_source "PomBase"; transcript_biotype "protein_coding"; exon_id "SPAC1751.04.1:exon:2";
I	PomBase	CDS	384480	384590	.	+	0	gene_id "SPAC1751.04"; transcript_id "SPAC1751.04.1"; exon_number "2"; gene_name "loc1"; gene_source "PomBase"; gene_biotype "protein_coding"; transcript_name "loc1"; transcript_source "PomBase"; transcript_biotype "protein_coding"; protein_id "SPAC1751.04.1:pep";
[truncated: 52,043 more rows]
