# Supplementary material for: Workflow for Genome-Wide Determination of Pre-mRNA Splicing Efficiency from Yeast RNA-seq Data
Source: Biomed Res Int. 2016 Dec 6;2016:4783841. doi: 10.1155/2016/4783841 (PMC5168555; doi:10.1155/2016/4783841)
Supplement: Supplementary file 1 — The Supplementary Material contains a table of PCR primers used in this study, and all scripts required to run the analyses of splicing efficiency presented in Figures 2 and 3. The scripts are commented and can be easily adapted for other RNA-seq datasets. An adaptation of the workflow for processing RNA-seq data from the fission yeast Schizosaccharomyces pombe is also included. [file 4783841.f1.zip › primers.xls]

## Sheet: List1
Primers used in this study
Primer ID	Sequence
ECM33-mRNA-F	CTCCGCTCTAGCTGCTAAC
ECM33-mRNA-R	ACCGGAGATTTTGTCCAAATCAG
ECM33-pre-mRNA-F	CTGTCATAGGATTAGGGCGAG
ECM33-pre-mRNA-R	GAAGTAGTTGAGTTAGCTGCTTAG
ACT1-mRNA-F	AATTTACTGAATTAACAATGGATTCTGAGG
ACT1-mRNA-R	GATAGATGGGAAGACAGCACG
ACT1-pre-mRNA-F	AATTTACTGAATTAACAATGGATTCTGGTA
ACT1-pre-mRNA-R	AGGTTATGGGAGAGTGAAAAATAGTA
COF1-mRNA-F	CTAACAAAAGAAGATGTCTAGATCTGGTG
COF1-mRNA-R	GGTTTTAGCATCGTTCAATCCG
COF1-pre-mRNA-F	ACAAAAGAAGATGTCTAGATCTGGGTA
COF1-pre-mRNA-R	GTTCCATGTTAAAAAGGGAGGAAAGA
RPL22A-mRNA-F	ATTAAGAAACAATGGCCCCAAACAC
RPL22A-mRNA-R	TGGGTCGAAGACACCGTTTTCA
RPL22A-pre-mRNA-F	TTAAGAAACAATGGCCCCAAACGTA
RPL22A-pre-mRNA-R	TTACTATCTTCCTTGTTATTCGCGTA
RPL22B-mRNA-F	CAACCACAATGGCTCCAAACAC
RPL22B-mRNA-R	ACCTCAATGGCGTTCCCTAAGT
RPL22B-pre-mRNA-F	CAACCACAATGGCTCCAAACGTA
RPL22B-pre-mRNA-R	CAATGAACTGTAGGAATAGAAAACTT
TOM22-F	CGACGTTGTCGATGATGAAG
TOM22-R	GCAACGATTCTGTCCAAC
SPT15-F	CTCAAAGCTGGCCAGTAGAA
SPT15-R	CGTCACACGAACCGACAATA
