# Supplementary material for: Workflow for Genome-Wide Determination of Pre-mRNA Splicing Efficiency from Yeast RNA-seq Data
Source: Biomed Res Int. 2016 Dec 6;2016:4783841. doi: 10.1155/2016/4783841 (PMC5168555; doi:10.1155/2016/4783841)
Supplement: Supplementary file 1 — The Supplementary Material contains a table of PCR primers used in this study, and all scripts required to run the analyses of splicing efficiency presented in Figures 2 and 3. The scripts are commented and can be easily adapted for other RNA-seq datasets. An adaptation of the workflow for processing RNA-seq data from the fission yeast Schizosaccharomyces pombe is also included. [file 4783841.f1.zip › prp4/genome/Saccharomyces_cerevisiae.R64-1-1.84.gtf]

#!genome-build R64-1-1
#!genome-version R64-1-1
#!genome-date 2011-09
#!genome-build-accession GCA_000146045.2
#!genebuild-last-updated 2011-12
IV	ensembl	gene	1802	2953	.	+	.	gene_id "YDL248W"; gene_name "COS7"; gene_source "ensembl"; gene_biotype "protein_coding";
IV	ensembl	transcript	1802	2953	.	+	.	gene_id "YDL248W"; transcript_id "YDL248W"; gene_name "COS7"; gene_source "ensembl"; gene_biotype "protein_coding"; transcript_name "COS7"; transcript_source "ensembl"; transcript_biotype "protein_coding";
IV	ensembl	exon	1802	2953	.	+	.	gene_id "YDL248W"; transcript_id "YDL248W"; exon_number "1"; gene_name "COS7"; gene_source "ensembl"; gene_biotype "protein_coding"; transcript_name "COS7"; transcript_source "ensembl"; transcript_biotype "protein_coding"; exon_id "YDL248W.1";
IV	ensembl	CDS	1802	2950	.	+	0	gene_id "YDL248W"; transcript_id "YDL248W"; exon_number "1"; gene_name "COS7"; gene_source "ensembl"; gene_biotype "protein_coding"; transcript_name "COS7"; transcript_source "ensembl"; transcript_biotype "protein_coding"; protein_id "YDL248W";
IV	ensembl	start_codon	1802	1804	.	+	0	gene_id "YDL248W"; transcript_id "YDL248W"; exon_number "1"; gene_name "COS7"; gene_source "ensembl"; gene_biotype "protein_coding"; transcript_name "COS7"; transcript_source "ensembl"; transcript_biotype "protein_coding";
IV	ensembl	stop_codon	2951	2953	.	+	0	gene_id "YDL248W"; transcript_id "YDL248W"; exon_number "1"; gene_name "COS7"; gene_source "ensembl"; gene_biotype "protein_coding"; transcript_name "COS7"; transcript_source "ensembl"; transcript_biotype "protein_coding";
IV	ensembl	gene	3762	3836	.	+	.	gene_id "YDL247W-A"; gene_source "ensembl"; gene_biotype "protein_coding";
IV	ensembl	transcript	3762	3836	.	+	.	gene_id "YDL247W-A"; transcript_id "YDL247W-A"; gene_source "ensembl"; gene_biotype "protein_coding"; transcript_name "YDL247W-A"; transcript_source "ensembl"; transcript_biotype "protein_coding";
IV	ensembl	exon	3762	3836	.	+	.	gene_id "YDL247W-A"; transcript_id "YDL247W-A"; exon_number "1"; gene_source "ensembl"; gene_biotype "protein_coding"; transcript_name "YDL247W-A"; transcript_source "ensembl"; transcript_biotype "protein_coding"; exon_id "YDL247W-A.1";
IV	ensembl	CDS	3762	3833	.	+	0	gene_id "YDL247W-A"; transcript_id "YDL247W-A"; exon_number "1"; gene_source "ensembl"; gene_biotype "protein_coding"; transcript_name "YDL247W-A"; transcript_source "ensembl"; transcript_biotype "protein_coding"; protein_id "YDL247W-A";
IV	ensembl	start_codon	3762	3764	.	+	0	gene_id "YDL247W-A"; transcript_id "YDL247W-A"; exon_number "1"; gene_source "ensembl"; gene_biotype "protein_coding"; transcript_name "YDL247W-A"; transcript_source "ensembl"; transcript_biotype "protein_coding";
IV	ensembl	stop_codon	3834	3836	.	+	0	gene_id "YDL247W-A"; transcript_id "YDL247W-A"; exon_number "1"; gene_source "ensembl"; gene_biotype "protein_coding"; transcript_name "YDL247W-A"; transcript_source "ensembl"; transcript_biotype "protein_coding";
IV	ensembl	gene	5985	7814	.	+	.	gene_id "YDL247W"; gene_name "MPH2"; gene_source "ensembl"; gene_biotype "protein_coding";
IV	ensembl	transcript	5985	7814	.	+	.	gene_id "YDL247W"; transcript_id "YDL247W"; gene_name "MPH2"; gene_source "ensembl"; gene_biotype "protein_coding"; transcript_name "MPH2"; transcript_source "ensembl"; transcript_biotype "protein_coding";
IV	ensembl	exon	5985	7814	.	+	.	gene_id "YDL247W"; transcript_id "YDL247W"; exon_number "1"; gene_name "MPH2"; gene_source "ensembl"; gene_biotype "protein_coding"; transcript_name "MPH2"; transcript_source "ensembl"; transcript_biotype "protein_coding"; exon_id "YDL247W.1";
IV	ensembl	CDS	5985	7811	.	+	0	gene_id "YDL247W"; transcript_id "YDL247W"; exon_number "1"; gene_name "MPH2"; gene_source "ensembl"; gene_biotype "protein_coding"; transcript_name "MPH2"; transcript_source "ensembl"; transcript_biotype "protein_coding"; protein_id "YDL247W";
IV	ensembl	start_codon	5985	5987	.	+	0	gene_id "YDL247W"; transcript_id "YDL247W"; exon_number "1"; gene_name "MPH2"; gene_source "ensembl"; gene_biotype "protein_coding"; transcript_name "MPH2"; transcript_source "ensembl"; transcript_biotype "protein_coding";
IV	ensembl	stop_codon	7812	7814	.	+	0	gene_id "YDL247W"; transcript_id "YDL247W"; exon_number "1"; gene_name "MPH2"; gene_source "ensembl"; gene_biotype "protein_coding"; transcript_name "MPH2"; transcript_source "ensembl"; transcript_biotype "protein_coding";
IV	ensembl	gene	8683	9756	.	-	.	gene_id "YDL246C"; gene_name "SOR2"; gene_source "ensembl"; gene_biotype "protein_coding";
IV	ensembl	transcript	8683	9756	.	-	.	gene_id "YDL246C"; transcript_id "YDL246C"; gene_name "SOR2"; gene_source "ensembl"; gene_biotype "protein_coding"; transcript_name "SOR2"; transcript_source "ensembl"; transcript_biotype "protein_coding";
IV	ensembl	exon	8683	9756	.	-	.	gene_id "YDL246C"; transcript_id "YDL246C"; exon_number "1"; gene_name "SOR2"; gene_source "ensembl"; gene_biotype "protein_coding"; transcript_name "SOR2"; transcript_source "ensembl"; transcript_biotype "protein_coding"; exon_id "YDL246C.1";
IV	ensembl	CDS	8686	9756	.	-	0	gene_id "YDL246C"; transcript_id "YDL246C"; exon_number "1"; gene_name "SOR2"; gene_source "ensembl"; gene_biotype "protein_coding"; transcript_name "SOR2"; transcript_source "ensembl"; transcript_biotype "protein_coding"; protein_id "YDL246C";
IV	ensembl	start_codon	9754	9756	.	-	0	gene_id "YDL246C"; transcript_id "YDL246C"; exon_number "1"; gene_name "SOR2"; gene_source "ensembl"; gene_biotype "protein_coding"; transcript_name "SOR2"; transcript_source "ensembl"; transcript_biotype "protein_coding";
IV	ensembl	stop_codon	8683	8685	.	-	0	gene_id "YDL246C"; transcript_id "YDL246C"; exon_number "1"; gene_name "SOR2"; gene_source "ensembl"; gene_biotype "protein_coding"; transcript_name "SOR2"; transcript_source "ensembl"; transcript_biotype "protein_coding";
IV	ensembl	gene	11657	13360	.	-	.	gene_id "YDL245C"; gene_name "HXT15"; gene_source "ensembl"; gene_biotype "protein_coding";
IV	ensembl	transcript	11657	13360	.	-	.	gene_id "YDL245C"; transcript_id "YDL245C"; gene_name "HXT15"; gene_source "ensembl"; gene_biotype "protein_coding"; transcript_name "HXT15"; transcript_source "ensembl"; transcript_biotype "protein_coding";
IV	ensembl	exon	11657	13360	.	-	.	gene_id "YDL245C"; transcript_id "YDL245C"; exon_number "1"; gene_name "HXT15"; gene_source "ensembl"; gene_biotype "protein_coding"; transcript_name "HXT15"; transcript_source "ensembl"; transcript_biotype "protein_coding"; exon_id "YDL245C.1";
IV	ensembl	CDS	11660	13360	.	-	0	gene_id "YDL245C"; transcript_id "YDL245C"; exon_number "1"; gene_name "HXT15"; gene_source "ensembl"; gene_biotype "protein_coding"; transcript_name "HXT15"; transcript_source "ensembl"; transcript_biotype "protein_coding"; protein_id "YDL245C";
IV	ensembl	start_codon	13358	13360	.	-	0	gene_id "YDL245C"; transcript_id "YDL245C"; exon_number "1"; gene_name "HXT15"; gene_source "ensembl"; gene_biotype "protein_coding"; transcript_name "HXT15"; transcript_source "ensembl"; transcript_biotype "protein_coding";
IV	ensembl	stop_codon	11657	11659	.	-	0	gene_id "YDL245C"; transcript_id "YDL245C"; exon_number "1"; gene_name "HXT15"; gene_source "ensembl"; gene_biotype "protein_coding"; transcript_name "HXT15"; transcript_source "ensembl"; transcript_biotype "protein_coding";
IV	ensembl	gene	16204	17226	.	+	.	gene_id "YDL244W"; gene_name "THI13"; gene_source "ensembl"; gene_biotype "protein_coding";
IV	ensembl	transcript	16204	17226	.	+	.	gene_id "YDL244W"; transcript_id "YDL244W"; gene_name "THI13"; gene_source "ensembl"; gene_biotype "protein_coding"; transcript_name "THI13"; transcript_source "ensembl"; transcript_biotype "protein_coding";
IV	ensembl	exon	16204	17226	.	+	.	gene_id "YDL244W"; transcript_id "YDL244W"; exon_number "1"; gene_name "THI13"; gene_source "ensembl"; gene_biotype "protein_coding"; transcript_name "THI13"; transcript_source "ensembl"; transcript_biotype "protein_coding"; exon_id "YDL244W.1";
IV	ensembl	CDS	16204	17223	.	+	0	gene_id "YDL244W"; transcript_id "YDL244W"; exon_number "1"; gene_name "THI13"; gene_source "ensembl"; gene_biotype "protein_coding"; transcript_name "THI13"; transcript_source "ensembl"; transcript_biotype "protein_coding"; protein_id "YDL244W";
IV	ensembl	start_codon	16204	16206	.	+	0	gene_id "YDL244W"; transcript_id "YDL244W"; exon_number "1"; gene_name "THI13"; gene_source "ensembl"; gene_biotype "protein_coding"; transcript_name "THI13"; transcript_source "ensembl"; transcript_biotype "protein_coding";
IV	ensembl	stop_codon	17224	17226	.	+	0	gene_id "YDL244W"; transcript_id "YDL244W"; exon_number "1"; gene_name "THI13"; gene_source "ensembl"; gene_biotype "protein_coding"; transcript_name "THI13"; transcript_source "ensembl"; transcript_biotype "protein_coding";
IV	ensembl	gene	17577	18566	.	-	.	gene_id "YDL243C"; gene_name "AAD4"; gene_source "ensembl"; gene_biotype "protein_coding";
IV	ensembl	transcript	17577	18566	.	-	.	gene_id "YDL243C"; transcript_id "YDL243C"; gene_name "AAD4"; gene_source "ensembl"; gene_biotype "protein_coding"; transcript_name "AAD4"; transcript_source "ensembl"; transcript_biotype "protein_coding";
IV	ensembl	exon	17577	18566	.	-	.	gene_id "YDL243C"; transcript_id "YDL243C"; exon_number "1"; gene_name "AAD4"; gene_source "ensembl"; gene_biotype "protein_coding"; transcript_name "AAD4"; transcript_source "ensembl"; transcript_biotype "protein_coding"; exon_id "YDL243C.1";
IV	ensembl	CDS	17580	18566	.	-	0	gene_id "YDL243C"; transcript_id "YDL243C"; exon_number "1"; gene_name "AAD4"; gene_source "ensembl"; gene_biotype "protein_coding"; transcript_name "AAD4"; transcript_source "ensembl"; transcript_biotype "protein_coding"; protein_id "YDL243C";
IV	ensembl	start_codon	18564	18566	.	-	0	gene_id "YDL243C"; transcript_id "YDL243C"; exon_number "1"; gene_name "AAD4"; gene_source "ensembl"; gene_biotype "protein_coding"; transcript_name "AAD4"; transcript_source "ensembl"; transcript_biotype "protein_coding";
IV	ensembl	stop_codon	17577	17579	.	-	0	gene_id "YDL243C"; transcript_id "YDL243C"; exon_number "1"; gene_name "AAD4"; gene_source "ensembl"; gene_biotype "protein_coding"; transcript_name "AAD4"; transcript_source "ensembl"; transcript_biotype "protein_coding";
IV	ensembl	gene	18959	19312	.	+	.	gene_id "YDL242W"; gene_source "ensembl"; gene_biotype "protein_coding";
IV	ensembl	transcript	18959	19312	.	+	.	gene_id "YDL242W"; transcript_id "YDL242W"; gene_source "ensembl"; gene_biotype "protein_coding"; transcript_name "YDL242W"; transcript_source "ensembl"; transcript_biotype "protein_coding";
IV	ensembl	exon	18959	19312	.	+	.	gene_id "YDL242W"; transcript_id "YDL242W"; exon_number "1"; gene_source "ensembl"; gene_biotype "protein_coding"; transcript_name "YDL242W"; transcript_source "ensembl"; transcript_biotype "protein_coding"; exon_id "YDL242W.1";
IV	ensembl	CDS	18959	19309	.	+	0	gene_id "YDL242W"; transcript_id "YDL242W"; exon_number "1"; gene_source "ensembl"; gene_biotype "protein_coding"; transcript_name "YDL242W"; transcript_source "ensembl"; transcript_biotype "protein_coding"; protein_id "YDL242W";
IV	ensembl	start_codon	18959	18961	.	+	0	gene_id "YDL242W"; transcript_id "YDL242W"; exon_number "1"; gene_source "ensembl"; gene_biotype "protein_coding"; transcript_name "YDL242W"; transcript_source "ensembl"; transcript_biotype "protein_coding";
IV	ensembl	stop_codon	19310	19312	.	+	0	gene_id "YDL242W"; transcript_id "YDL242W"; exon_number "1"; gene_source "ensembl"; gene_biotype "protein_coding"; transcript_name "YDL242W"; transcript_source "ensembl"; transcript_biotype "protein_coding";
IV	ensembl	gene	20635	21006	.	+	.	gene_id "YDL241W"; gene_source "ensembl"; gene_biotype "protein_coding";
IV	ensembl	transcript	20635	21006	.	+	.	gene_id "YDL241W"; transcript_id "YDL241W"; gene_source "ensembl"; gene_biotype "protein_coding"; transcript_name "YDL241W"; transcript_source "ensembl"; transcript_biotype "protein_coding";
IV	ensembl	exon	20635	21006	.	+	.	gene_id "YDL241W"; transcript_id "YDL241W"; exon_number "1"; gene_source "ensembl"; gene_biotype "protein_coding"; transcript_name "YDL241W"; transcript_source "ensembl"; transcript_biotype "protein_coding"; exon_id "YDL241W.1";
IV	ensembl	CDS	20635	21003	.	+	0	gene_id "YDL241W"; transcript_id "YDL241W"; exon_number "1"; gene_source "ensembl"; gene_biotype "protein_coding"; transcript_name "YDL241W"; transcript_source "ensembl"; transcript_biotype "protein_coding"; protein_id "YDL241W";
IV	ensembl	start_codon	20635	20637	.	+	0	gene_id "YDL241W"; transcript_id "YDL241W"; exon_number "1"; gene_source "ensembl"; gene_biotype "protein_coding"; transcript_name "YDL241W"; transcript_source "ensembl"; transcript_biotype "protein_coding";
IV	ensembl	stop_codon	21004	21006	.	+	0	gene_id "YDL241W"; transcript_id "YDL241W"; exon_number "1"; gene_source "ensembl"; gene_biotype "protein_coding"; transcript_name "YDL241W"; transcript_source "ensembl"; transcript_biotype "protein_coding";
IV	ensembl	gene	22471	22608	.	-	.	gene_id "YDL240C-A"; gene_source "ensembl"; gene_biotype "protein_coding";
IV	ensembl	transcript	22471	22608	.	-	.	gene_id "YDL240C-A"; transcript_id "YDL240C-A"; gene_source "ensembl"; gene_biotype "protein_coding"; transcript_name "YDL240C-A"; transcript_source "ensembl"; transcript_biotype "protein_coding";
IV	ensembl	exon	22471	22608	.	-	.	gene_id "YDL240C-A"; transcript_id "YDL240C-A"; exon_number "1"; gene_source "ensembl"; gene_biotype "protein_coding"; transcript_name "YDL240C-A"; transcript_source "ensembl"; transcript_biotype "protein_coding"; exon_id "YDL240C-A.1";
IV	ensembl	CDS	22474	22608	.	-	0	gene_id "YDL240C-A"; transcript_id "YDL240C-A"; exon_number "1"; gene_source "ensembl"; gene_biotype "protein_coding"; transcript_name "YDL240C-A"; transcript_source "ensembl"; transcript_biotype "protein_coding"; protein_id "YDL240C-A";
IV	ensembl	start_codon	22606	22608	.	-	0	gene_id "YDL240C-A"; transcript_id "YDL240C-A"; exon_number "1"; gene_source "ensembl"; gene_biotype "protein_coding"; transcript_name "YDL240C-A"; transcript_source "ensembl"; transcript_biotype "protein_coding";
IV	ensembl	stop_codon	22471	22473	.	-	0	gene_id "YDL240C-A"; transcript_id "YDL240C-A"; exon_number "1"; gene_source "ensembl"; gene_biotype "protein_coding"; transcript_name "YDL240C-A"; transcript_source "ensembl"; transcript_biotype "protein_coding";
IV	ensembl	gene	22823	25876	.	+	.	gene_id "YDL240W"; gene_name "LRG1"; gene_source "ensembl"; gene_biotype "protein_coding";
IV	ensembl	transcript	22823	25876	.	+	.	gene_id "YDL240W"; transcript_id "YDL240W"; gene_name "LRG1"; gene_source "ensembl"; gene_biotype "protein_coding"; transcript_name "LRG1"; transcript_source "ensembl"; transcript_biotype "protein_coding";
IV	ensembl	exon	22823	25876	.	+	.	gene_id "YDL240W"; transcript_id "YDL240W"; exon_number "1"; gene_name "LRG1"; gene_source "ensembl"; gene_biotype "protein_coding"; transcript_name "LRG1"; transcript_source "ensembl"; transcript_biotype "protein_coding"; exon_id "YDL240W.1";
IV	ensembl	CDS	22823	25873	.	+	0	gene_id "YDL240W"; transcript_id "YDL240W"; exon_number "1"; gene_name "LRG1"; gene_source "ensembl"; gene_biotype "protein_coding"; transcript_name "LRG1"; transcript_source "ensembl"; transcript_biotype "protein_coding"; protein_id "YDL240W";
IV	ensembl	start_codon	22823	22825	.	+	0	gene_id "YDL240W"; transcript_id "YDL240W"; exon_number "1"; gene_name "LRG1"; gene_source "ensembl"; gene_biotype "protein_coding"; transcript_name "LRG1"; transcript_source "ensembl"; transcript_biotype "protein_coding";
IV	ensembl	stop_codon	25874	25876	.	+	0	gene_id "YDL240W"; transcript_id "YDL240W"; exon_number "1"; gene_name "LRG1"; gene_source "ensembl"; gene_biotype "protein_coding"; transcript_name "LRG1"; transcript_source "ensembl"; transcript_biotype "protein_coding";
IV	ensembl	gene	26403	28775	.	-	.	gene_id "YDL239C"; gene_name "ADY3"; gene_source "ensembl"; gene_biotype "protein_coding";
IV	ensembl	transcript	26403	28775	.	-	.	gene_id "YDL239C"; transcript_id "YDL239C"; gene_name "ADY3"; gene_source "ensembl"; gene_biotype "protein_coding"; transcript_name "ADY3"; transcript_source "ensembl"; transcript_biotype "protein_coding";
IV	ensembl	exon	26403	28775	.	-	.	gene_id "YDL239C"; transcript_id "YDL239C"; exon_number "1"; gene_name "ADY3"; gene_source "ensembl"; gene_biotype "protein_coding"; transcript_name "ADY3"; transcript_source "ensembl"; transcript_biotype "protein_coding"; exon_id "YDL239C.1";
IV	ensembl	CDS	26406	28775	.	-	0	gene_id "YDL239C"; transcript_id "YDL239C"; exon_number "1"; gene_name "ADY3"; gene_source "ensembl"; gene_biotype "protein_coding"; transcript_name "ADY3"; transcript_source "ensembl"; transcript_biotype "protein_coding"; protein_id "YDL239C";
IV	ensembl	start_codon	28773	28775	.	-	0	gene_id "YDL239C"; transcript_id "YDL239C"; exon_number "1"; gene_name "ADY3"; gene_source "ensembl"; gene_biotype "protein_coding"; transcript_name "ADY3"; transcript_source "ensembl"; transcript_biotype "protein_coding";
IV	ensembl	stop_codon	26403	26405	.	-	0	gene_id "YDL239C"; transcript_id "YDL239C"; exon_number "1"; gene_name "ADY3"; gene_source "ensembl"; gene_biotype "protein_coding"; transcript_name "ADY3"; transcript_source "ensembl"; transcript_biotype "protein_coding";
IV	ensembl	gene	28985	30454	.	-	.	gene_id "YDL238C"; gene_name "GUD1"; gene_source "ensembl"; gene_biotype "protein_coding";
IV	ensembl	transcript	28985	30454	.	-	.	gene_id "YDL238C"; transcript_id "YDL238C"; gene_name "GUD1"; gene_source "ensembl"; gene_biotype "protein_coding"; transcript_name "GUD1"; transcript_source "ensembl"; transcript_biotype "protein_coding";
IV	ensembl	exon	28985	30454	.	-	.	gene_id "YDL238C"; transcript_id "YDL238C"; exon_number "1"; gene_name "GUD1"; gene_source "ensembl"; gene_biotype "protein_coding"; transcript_name "GUD1"; transcript_source "ensembl"; transcript_biotype "protein_coding"; exon_id "YDL238C.1";
IV	ensembl	CDS	28988	30454	.	-	0	gene_id "YDL238C"; transcript_id "YDL238C"; exon_number "1"; gene_name "GUD1"; gene_source "ensembl"; gene_biotype "protein_coding"; transcript_name "GUD1"; transcript_source "ensembl"; transcript_biotype "protein_coding"; protein_id "YDL238C";
IV	ensembl	start_codon	30452	30454	.	-	0	gene_id "YDL238C"; transcript_id "YDL238C"; exon_number "1"; gene_name "GUD1"; gene_source "ensembl"; gene_biotype "protein_coding"; transcript_name "GUD1"; transcript_source "ensembl"; transcript_biotype "protein_coding";
IV	ensembl	stop_codon	28985	28987	.	-	0	gene_id "YDL238C"; transcript_id "YDL238C"; exon_number "1"; gene_name "GUD1"; gene_source "ensembl"; gene_biotype "protein_coding"; transcript_name "GUD1"; transcript_source "ensembl"; transcript_biotype "protein_coding";
IV	ensembl	gene	30657	31829	.	+	.	gene_id "YDL237W"; gene_name "AIM6"; gene_source "ensembl"; gene_biotype "protein_coding";
IV	ensembl	transcript	30657	31829	.	+	.	gene_id "YDL237W"; transcript_id "YDL237W"; gene_name "AIM6"; gene_source "ensembl"; gene_biotype "protein_coding"; transcript_name "AIM6"; transcript_source "ensembl"; transcript_biotype "protein_coding";
IV	ensembl	exon	30657	31829	.	+	.	gene_id "YDL237W"; transcript_id "YDL237W"; exon_number "1"; gene_name "AIM6"; gene_source "ensembl"; gene_biotype "protein_coding"; transcript_name "AIM6"; transcript_source "ensembl"; transcript_biotype "protein_coding"; exon_id "YDL237W.1";
IV	ensembl	CDS	30657	31826	.	+	0	gene_id "YDL237W"; transcript_id "YDL237W"; exon_number "1"; gene_name "AIM6"; gene_source "ensembl"; gene_biotype "protein_coding"; transcript_name "AIM6"; transcript_source "ensembl"; transcript_biotype "protein_coding"; protein_id "YDL237W";
IV	ensembl	start_codon	30657	30659	.	+	0	gene_id "YDL237W"; transcript_id "YDL237W"; exon_number "1"; gene_name "AIM6"; gene_source "ensembl"; gene_biotype "protein_coding"; transcript_name "AIM6"; transcript_source "ensembl"; transcript_biotype "protein_coding";
IV	ensembl	stop_codon	31827	31829	.	+	0	gene_id "YDL237W"; transcript_id "YDL237W"; exon_number "1"; gene_name "AIM6"; gene_source "ensembl"; gene_biotype "protein_coding"; transcript_name "AIM6"; transcript_source "ensembl"; transcript_biotype "protein_coding";
IV	ensembl	gene	32296	33234	.	+	.	gene_id "YDL236W"; gene_name "PHO13"; gene_source "ensembl"; gene_biotype "protein_coding";
IV	ensembl	transcript	32296	33234	.	+	.	gene_id "YDL236W"; transcript_id "YDL236W"; gene_name "PHO13"; gene_source "ensembl"; gene_biotype "protein_coding"; transcript_name "PHO13"; transcript_source "ensembl"; transcript_biotype "protein_coding";
IV	ensembl	exon	32296	33234	.	+	.	gene_id "YDL236W"; transcript_id "YDL236W"; exon_number "1"; gene_name "PHO13"; gene_source "ensembl"; gene_biotype "protein_coding"; transcript_name "PHO13"; transcript_source "ensembl"; transcript_biotype "protein_coding"; exon_id "YDL236W.1";
IV	ensembl	CDS	32296	33231	.	+	0	gene_id "YDL236W"; transcript_id "YDL236W"; exon_number "1"; gene_name "PHO13"; gene_source "ensembl"; gene_biotype "protein_coding"; transcript_name "PHO13"; transcript_source "ensembl"; transcript_biotype "protein_coding"; protein_id "YDL236W";
IV	ensembl	start_codon	32296	32298	.	+	0	gene_id "YDL236W"; transcript_id "YDL236W"; exon_number "1"; gene_name "PHO13"; gene_source "ensembl"; gene_biotype "protein_coding"; transcript_name "PHO13"; transcript_source "ensembl"; transcript_biotype "protein_coding";
IV	ensembl	stop_codon	33232	33234	.	+	0	gene_id "YDL236W"; transcript_id "YDL236W"; exon_number "1"; gene_name "PHO13"; gene_source "ensembl"; gene_biotype "protein_coding"; transcript_name "PHO13"; transcript_source "ensembl"; transcript_biotype "protein_coding";
IV	ensembl	gene	33415	33918	.	-	.	gene_id "YDL235C"; gene_name "YPD1"; gene_source "ensembl"; gene_biotype "protein_coding";
IV	ensembl	transcript	33415	33918	.	-	.	gene_id "YDL235C"; transcript_id "YDL235C"; gene_name "YPD1"; gene_source "ensembl"; gene_biotype "protein_coding"; transcript_name "YPD1"; transcript_source "ensembl"; transcript_biotype "protein_coding";
IV	ensembl	exon	33415	33918	.	-	.	gene_id "YDL235C"; transcript_id "YDL235C"; exon_number "1"; gene_name "YPD1"; gene_source "ensembl"; gene_biotype "protein_coding"; transcript_name "YPD1"; transcript_source "ensembl"; transcript_biotype "protein_coding"; exon_id "YDL235C.1";
IV	ensembl	CDS	33418	33918	.	-	0	gene_id "YDL235C"; transcript_id "YDL235C"; exon_number "1"; gene_name "YPD1"; gene_source "ensembl"; gene_biotype "protein_coding"; transcript_name "YPD1"; transcript_source "ensembl"; transcript_biotype "protein_coding"; protein_id "YDL235C";
IV	ensembl	start_codon	33916	33918	.	-	0	gene_id "YDL235C"; transcript_id "YDL235C"; exon_number "1"; gene_name "YPD1"; gene_source "ensembl"; gene_biotype "protein_coding"; transcript_name "YPD1"; transcript_source "ensembl"; transcript_biotype "protein_coding";
IV	ensembl	stop_codon	33415	33417	.	-	0	gene_id "YDL235C"; transcript_id "YDL235C"; exon_number "1"; gene_name "YPD1"; gene_source "ensembl"; gene_biotype "protein_coding"; transcript_name "YPD1"; transcript_source "ensembl"; transcript_biotype "protein_coding";
IV	ensembl	gene	34237	36477	.	-	.	gene_id "YDL234C"; gene_name "GYP7"; gene_source "ensembl"; gene_biotype "protein_coding";
IV	ensembl	transcript	34237	36477	.	-	.	gene_id "YDL234C"; transcript_id "YDL234C"; gene_name "GYP7"; gene_source "ensembl"; gene_biotype "protein_coding"; transcript_name "GYP7"; transcript_source "ensembl"; transcript_biotype "protein_coding";
IV	ensembl	exon	34237	36477	.	-	.	gene_id "YDL234C"; transcript_id "YDL234C"; exon_number "1"; gene_name "GYP7"; gene_source "ensembl"; gene_biotype "protein_coding"; transcript_name "GYP7"; transcript_source "ensembl"; transcript_biotype "protein_coding"; exon_id "YDL234C.1";
IV	ensembl	CDS	34240	36477	.	-	0	gene_id "YDL234C"; transcript_id "YDL234C"; exon_number "1"; gene_name "GYP7"; gene_source "ensembl"; gene_biotype "protein_coding"; transcript_name "GYP7"; transcript_source "ensembl"; transcript_biotype "protein_coding"; protein_id "YDL234C";
IV	ensembl	start_codon	36475	36477	.	-	0	gene_id "YDL234C"; transcript_id "YDL234C"; exon_number "1"; gene_name "GYP7"; gene_source "ensembl"; gene_biotype "protein_coding"; transcript_name "GYP7"; transcript_source "ensembl"; transcript_biotype "protein_coding";
IV	ensembl	stop_codon	34237	34239	.	-	0	gene_id "YDL234C"; transcript_id "YDL234C"; exon_number "1"; gene_name "GYP7"; gene_source "ensembl"; gene_biotype "protein_coding"; transcript_name "GYP7"; transcript_source "ensembl"; transcript_biotype "protein_coding";
IV	ensembl	gene	36797	38173	.	+	.	gene_id "YDL233W"; gene_name "MFG1"; gene_source "ensembl"; gene_biotype "protein_coding";
IV	ensembl	transcript	36797	38173	.	+	.	gene_id "YDL233W"; transcript_id "YDL233W"; gene_name "MFG1"; gene_source "ensembl"; gene_biotype "protein_coding"; transcript_name "YDL233W"; transcript_source "ensembl"; transcript_biotype "protein_coding";
IV	ensembl	exon	36797	38173	.	+	.	gene_id "YDL233W"; transcript_id "YDL233W"; exon_number "1"; gene_name "MFG1"; gene_source "ensembl"; gene_biotype "protein_coding"; transcript_name "YDL233W"; transcript_source "ensembl"; transcript_biotype "protein_coding"; exon_id "YDL233W.1";
IV	ensembl	CDS	36797	38170	.	+	0	gene_id "YDL233W"; transcript_id "YDL233W"; exon_number "1"; gene_name "MFG1"; gene_source "ensembl"; gene_biotype "protein_coding"; transcript_name "YDL233W"; transcript_source "ensembl"; transcript_biotype "protein_coding"; protein_id "YDL233W";
IV	ensembl	start_codon	36797	36799	.	+	0	gene_id "YDL233W"; transcript_id "YDL233W"; exon_number "1"; gene_name "MFG1"; gene_source "ensembl"; gene_biotype "protein_coding"; transcript_name "YDL233W"; transcript_source "ensembl"; transcript_biotype "protein_coding";
IV	ensembl	stop_codon	38171	38173	.	+	0	gene_id "YDL233W"; transcript_id "YDL233W"; exon_number "1"; gene_name "MFG1"; gene_source "ensembl"; gene_biotype "protein_coding"; transcript_name "YDL233W"; transcript_source "ensembl"; transcript_biotype "protein_coding";
IV	ensembl	gene	38487	38597	.	+	.	gene_id "YDL232W"; gene_name "OST4"; gene_source "ensembl"; gene_biotype "protein_coding";
IV	ensembl	transcript	38487	38597	.	+	.	gene_id "YDL232W"; transcript_id "YDL232W"; gene_name "OST4"; gene_source "ensembl"; gene_biotype "protein_coding"; transcript_name "OST4"; transcript_source "ensembl"; transcript_biotype "protein_coding";
IV	ensembl	exon	38487	38597	.	+	.	gene_id "YDL232W"; transcript_id "YDL232W"; exon_number "1"; gene_name "OST4"; gene_source "ensembl"; gene_biotype "protein_coding"; transcript_name "OST4"; transcript_source "ensembl"; transcript_biotype "protein_coding"; exon_id "YDL232W.1";
IV	ensembl	CDS	38487	38594	.	+	0	gene_id "YDL232W"; transcript_id "YDL232W"; exon_number "1"; gene_name "OST4"; gene_source "ensembl"; gene_biotype "protein_coding"; transcript_name "OST4"; transcript_source "ensembl"; transcript_biotype "protein_coding"; protein_id "YDL232W";
IV	ensembl	start_codon	38487	38489	.	+	0	gene_id "YDL232W"; transcript_id "YDL232W"; exon_number "1"; gene_name "OST4"; gene_source "ensembl"; gene_biotype "protein_coding"; transcript_name "OST4"; transcript_source "ensembl"; transcript_biotype "protein_coding";
IV	ensembl	stop_codon	38595	38597	.	+	0	gene_id "YDL232W"; transcript_id "YDL232W"; exon_number "1"; gene_name "OST4"; gene_source "ensembl"; gene_biotype "protein_coding"; transcript_name "OST4"; transcript_source "ensembl"; transcript_biotype "protein_coding";
IV	ensembl	gene	38867	42244	.	-	.	gene_id "YDL231C"; gene_name "BRE4"; gene_source "ensembl"; gene_biotype "protein_coding";
IV	ensembl	transcript	38867	42244	.	-	.	gene_id "YDL231C"; transcript_id "YDL231C"; gene_name "BRE4"; gene_source "ensembl"; gene_biotype "protein_coding"; transcript_name "BRE4"; transcript_source "ensembl"; transcript_biotype "protein_coding";
IV	ensembl	exon	38867	42244	.	-	.	gene_id "YDL231C"; transcript_id "YDL231C"; exon_number "1"; gene_name "BRE4"; gene_source "ensembl"; gene_biotype "protein_coding"; transcript_name "BRE4"; transcript_source "ensembl"; transcript_biotype "protein_coding"; exon_id "YDL231C.1";
IV	ensembl	CDS	38870	42244	.	-	0	gene_id "YDL231C"; transcript_id "YDL231C"; exon_number "1"; gene_name "BRE4"; gene_source "ensembl"; gene_biotype "protein_coding"; transcript_name "BRE4"; transcript_source "ensembl"; transcript_biotype "protein_coding"; protein_id "YDL231C";
IV	ensembl	start_codon	42242	42244	.	-	0	gene_id "YDL231C"; transcript_id "YDL231C"; exon_number "1"; gene_name "BRE4"; gene_source "ensembl"; gene_biotype "protein_coding"; transcript_name "BRE4"; transcript_source "ensembl"; transcript_biotype "protein_coding";
IV	ensembl	stop_codon	38867	38869	.	-	0	gene_id "YDL231C"; transcript_id "YDL231C"; exon_number "1"; gene_name "BRE4"; gene_source "ensembl"; gene_biotype "protein_coding"; transcript_name "BRE4"; transcript_source "ensembl"; transcript_biotype "protein_coding";
IV	ensembl	gene	42700	43707	.	+	.	gene_id "YDL230W"; gene_name "PTP1"; gene_source "ensembl"; gene_biotype "protein_coding";
IV	ensembl	transcript	42700	43707	.	+	.	gene_id "YDL230W"; transcript_id "YDL230W"; gene_name "PTP1"; gene_source "ensembl"; gene_biotype "protein_coding"; transcript_name "PTP1"; transcript_source "ensembl"; transcript_biotype "protein_coding";
IV	ensembl	exon	42700	43707	.	+	.	gene_id "YDL230W"; transcript_id "YDL230W"; exon_number "1"; gene_name "PTP1"; gene_source "ensembl"; gene_biotype "protein_coding"; transcript_name "PTP1"; transcript_source "ensembl"; transcript_biotype "protein_coding"; exon_id "YDL230W.1";
IV	ensembl	CDS	42700	43704	.	+	0	gene_id "YDL230W"; transcript_id "YDL230W"; exon_number "1"; gene_name "PTP1"; gene_source "ensembl"; gene_biotype "protein_coding"; transcript_name "PTP1"; transcript_source "ensembl"; transcript_biotype "protein_coding"; protein_id "YDL230W";
IV	ensembl	start_codon	42700	42702	.	+	0	gene_id "YDL230W"; transcript_id "YDL230W"; exon_number "1"; gene_name "PTP1"; gene_source "ensembl"; gene_biotype "protein_coding"; transcript_name "PTP1"; transcript_source "ensembl"; transcript_biotype "protein_coding";
IV	ensembl	stop_codon	43705	43707	.	+	0	gene_id "YDL230W"; transcript_id "YDL230W"; exon_number "1"; gene_name "PTP1"; gene_source "ensembl"; gene_biotype "protein_coding"; transcript_name "PTP1"; transcript_source "ensembl"; transcript_biotype "protein_coding";
IV	ensembl	gene	44065	45906	.	+	.	gene_id "YDL229W"; gene_name "SSB1"; gene_source "ensembl"; gene_biotype "protein_coding";
IV	ensembl	transcript	44065	45906	.	+	.	gene_id "YDL229W"; transcript_id "YDL229W"; gene_name "SSB1"; gene_source "ensembl"; gene_biotype "protein_coding"; transcript_name "SSB1"; transcript_source "ensembl"; transcript_biotype "protein_coding";
IV	ensembl	exon	44065	45906	.	+	.	gene_id "YDL229W"; transcript_id "YDL229W"; exon_number "1"; gene_name "SSB1"; gene_source "ensembl"; gene_biotype "protein_coding"; transcript_name "SSB1"; transcript_source "ensembl"; transcript_biotype "protein_coding"; exon_id "YDL229W.1";
IV	ensembl	CDS	44065	45903	.	+	0	gene_id "YDL229W"; transcript_id "YDL229W"; exon_number "1"; gene_name "SSB1"; gene_source "ensembl"; gene_biotype "protein_coding"; transcript_name "SSB1"; transcript_source "ensembl"; transcript_biotype "protein_coding"; protein_id "YDL229W";
IV	ensembl	start_codon	44065	44067	.	+	0	gene_id "YDL229W"; transcript_id "YDL229W"; exon_number "1"; gene_name "SSB1"; gene_source "ensembl"; gene_biotype "protein_coding"; transcript_name "SSB1"; transcript_source "ensembl"; transcript_biotype "protein_coding";
IV	ensembl	stop_codon	45904	45906	.	+	0	gene_id "YDL229W"; transcript_id "YDL229W"; exon_number "1"; gene_name "SSB1"; gene_source "ensembl"; gene_biotype "protein_coding"; transcript_name "SSB1"; transcript_source "ensembl"; transcript_biotype "protein_coding";
IV	ensembl	gene	45277	45918	.	-	.	gene_id "YDL228C"; gene_source "ensembl"; gene_biotype "protein_coding";
IV	ensembl	transcript	45277	45918	.	-	.	gene_id "YDL228C"; transcript_id "YDL228C"; gene_source "ensembl"; gene_biotype "protein_coding"; transcript_name "YDL228C"; transcript_source "ensembl"; transcript_biotype "protein_coding";
IV	ensembl	exon	45277	45918	.	-	.	gene_id "YDL228C"; transcript_id "YDL228C"; exon_number "1"; gene_source "ensembl"; gene_biotype "protein_coding"; transcript_name "YDL228C"; transcript_source "ensembl"; transcript_biotype "protein_coding"; exon_id "YDL228C.1";
IV	ensembl	CDS	45280	45918	.	-	0	gene_id "YDL228C"; transcript_id "YDL228C"; exon_number "1"; gene_source "ensembl"; gene_biotype "protein_coding"; transcript_name "YDL228C"; transcript_source "ensembl"; transcript_biotype "protein_coding"; protein_id "YDL228C";
IV	ensembl	start_codon	45916	45918	.	-	0	gene_id "YDL228C"; transcript_id "YDL228C"; exon_number "1"; gene_source "ensembl"; gene_biotype "protein_coding"; transcript_name "YDL228C"; transcript_source "ensembl"; transcript_biotype "protein_coding";
IV	ensembl	stop_codon	45277	45279	.	-	0	gene_id "YDL228C"; transcript_id "YDL228C"; exon_number "1"; gene_source "ensembl"; gene_biotype "protein_coding"; transcript_name "YDL228C"; transcript_source "ensembl"; transcript_biotype "protein_coding";
IV	ensembl	gene	46271	48031	.	-	.	gene_id "YDL227C"; gene_name "HO"; gene_source "ensembl"; gene_biotype "protein_coding";
IV	ensembl	transcript	46271	48031	.	-	.	gene_id "YDL227C"; transcript_id "YDL227C"; gene_name "HO"; gene_source "ensembl"; gene_biotype "protein_coding"; transcript_name "HO"; transcript_source "ensembl"; transcript_biotype "protein_coding";
IV	ensembl	exon	46271	48031	.	-	.	gene_id "YDL227C"; transcript_id "YDL227C"; exon_number "1"; gene_name "HO"; gene_source "ensembl"; gene_biotype "protein_coding"; transcript_name "HO"; transcript_source "ensembl"; transcript_biotype "protein_coding"; exon_id "YDL227C.1";
IV	ensembl	CDS	46274	48031	.	-	0	gene_id "YDL227C"; transcript_id "YDL227C"; exon_number "1"; gene_name "HO"; gene_source "ensembl"; gene_biotype "protein_coding"; transcript_name "HO"; transcript_source "ensembl"; transcript_biotype "protein_coding"; protein_id "YDL227C";
IV	ensembl	start_codon	48029	48031	.	-	0	gene_id "YDL227C"; transcript_id "YDL227C"; exon_number "1"; gene_name "HO"; gene_source "ensembl"; gene_biotype "protein_coding"; transcript_name "HO"; transcript_source "ensembl"; transcript_biotype "protein_coding";
IV	ensembl	stop_codon	46271	46273	.	-	0	gene_id "YDL227C"; transcript_id "YDL227C"; exon_number "1"; gene_name "HO"; gene_source "ensembl"; gene_biotype "protein_coding"; transcript_name "HO"; transcript_source "ensembl"; transcript_biotype "protein_coding";
IV	ensembl	gene	51115	52173	.	-	.	gene_id "YDL226C"; gene_name "GCS1"; gene_source "ensembl"; gene_biotype "protein_coding";
IV	ensembl	transcript	51115	52173	.	-	.	gene_id "YDL226C"; transcript_id "YDL226C"; gene_name "GCS1"; gene_source "ensembl"; gene_biotype "protein_coding"; transcript_name "GCS1"; transcript_source "ensembl"; transcript_biotype "protein_coding";
IV	ensembl	exon	51115	52173	.	-	.	gene_id "YDL226C"; transcript_id "YDL226C"; exon_number "1"; gene_name "GCS1"; gene_source "ensembl"; gene_biotype "protein_coding"; transcript_name "GCS1"; transcript_source "ensembl"; transcript_biotype "protein_coding"; exon_id "YDL226C.1";
IV	ensembl	CDS	51118	52173	.	-	0	gene_id "YDL226C"; transcript_id "YDL226C"; exon_number "1"; gene_name "GCS1"; gene_source "ensembl"; gene_biotype "protein_coding"; transcript_name "GCS1"; transcript_source "ensembl"; transcript_biotype "protein_coding"; protein_id "YDL226C";
IV	ensembl	start_codon	52171	52173	.	-	0	gene_id "YDL226C"; transcript_id "YDL226C"; exon_number "1"; gene_name "GCS1"; gene_source "ensembl"; gene_biotype "protein_coding"; transcript_name "GCS1"; transcript_source "ensembl"; transcript_biotype "protein_coding";
IV	ensembl	stop_codon	51115	51117	.	-	0	gene_id "YDL226C"; transcript_id "YDL226C"; exon_number "1"; gene_name "GCS1"; gene_source "ensembl"; gene_biotype "protein_coding"; transcript_name "GCS1"; transcript_source "ensembl"; transcript_biotype "protein_coding";
IV	ensembl	gene	52445	54100	.	+	.	gene_id "YDL225W"; gene_name "SHS1"; gene_source "ensembl"; gene_biotype "protein_coding";
IV	ensembl	transcript	52445	54100	.	+	.	gene_id "YDL225W"; transcript_id "YDL225W"; gene_name "SHS1"; gene_source "ensembl"; gene_biotype "protein_coding"; transcript_name "SHS1"; transcript_source "ensembl"; transcript_biotype "protein_coding";
IV	ensembl	exon	52445	54100	.	+	.	gene_id "YDL225W"; transcript_id "YDL225W"; exon_number "1"; gene_name "SHS1"; gene_source "ensembl"; gene_biotype "protein_coding"; transcript_name "SHS1"; transcript_source "ensembl"; transcript_biotype "protein_coding"; exon_id "YDL225W.1";
IV	ensembl	CDS	52445	54097	.	+	0	gene_id "YDL225W"; transcript_id "YDL225W"; exon_number "1"; gene_name "SHS1"; gene_source "ensembl"; gene_biotype "protein_coding"; transcript_name "SHS1"; transcript_source "ensembl"; transcript_biotype "protein_coding"; protein_id "YDL225W";
IV	ensembl	start_codon	52445	52447	.	+	0	gene_id "YDL225W"; transcript_id "YDL225W"; exon_number "1"; gene_name "SHS1"; gene_source "ensembl"; gene_biotype "protein_coding"; transcript_name "SHS1"; transcript_source "ensembl"; transcript_biotype "protein_coding";
IV	ensembl	stop_codon	54098	54100	.	+	0	gene_id "YDL225W"; transcript_id "YDL225W"; exon_number "1"; gene_name "SHS1"; gene_source "ensembl"; gene_biotype "protein_coding"; transcript_name "SHS1"; transcript_source "ensembl"; transcript_biotype "protein_coding";
IV	ensembl	gene	54397	56346	.	-	.	gene_id "YDL224C"; gene_name "WHI4"; gene_source "ensembl"; gene_biotype "protein_coding";
IV	ensembl	transcript	54397	56346	.	-	.	gene_id "YDL224C"; transcript_id "YDL224C"; gene_name "WHI4"; gene_source "ensembl"; gene_biotype "protein_coding"; transcript_name "WHI4"; transcript_source "ensembl"; transcript_biotype "protein_coding";
IV	ensembl	exon	54397	56346	.	-	.	gene_id "YDL224C"; transcript_id "YDL224C"; exon_number "1"; gene_name "WHI4"; gene_source "ensembl"; gene_biotype "protein_coding"; transcript_name "WHI4"; transcript_source "ensembl"; transcript_biotype "protein_coding"; exon_id "YDL224C.1";
IV	ensembl	CDS	54400	56346	.	-	0	gene_id "YDL224C"; transcript_id "YDL224C"; exon_number "1"; gene_name "WHI4"; gene_source "ensembl"; gene_biotype "protein_coding"; transcript_name "WHI4"; transcript_source "ensembl"; transcript_biotype "protein_coding"; protein_id "YDL224C";
IV	ensembl	start_codon	56344	56346	.	-	0	gene_id "YDL224C"; transcript_id "YDL224C"; exon_number "1"; gene_name "WHI4"; gene_source "ensembl"; gene_biotype "protein_coding"; transcript_name "WHI4"; transcript_source "ensembl"; transcript_biotype "protein_coding";
IV	ensembl	stop_codon	54397	54399	.	-	0	gene_id "YDL224C"; transcript_id "YDL224C"; exon_number "1"; gene_name "WHI4"; gene_source "ensembl"; gene_biotype "protein_coding"; transcript_name "WHI4"; transcript_source "ensembl"; transcript_biotype "protein_coding";
IV	ensembl	gene	57265	60405	.	-	.	gene_id "YDL223C"; gene_name "HBT1"; gene_source "ensembl"; gene_biotype "protein_coding";
IV	ensembl	transcript	57265	60405	.	-	.	gene_id "YDL223C"; transcript_id "YDL223C"; gene_name "HBT1"; gene_source "ensembl"; gene_biotype "protein_coding"; transcript_name "HBT1"; transcript_source "ensembl"; transcript_biotype "protein_coding";
IV	ensembl	exon	57265	60405	.	-	.	gene_id "YDL223C"; transcript_id "YDL223C"; exon_number "1"; gene_name "HBT1"; gene_source "ensembl"; gene_biotype "protein_coding"; transcript_name "HBT1"; transcript_source "ensembl"; transcript_biotype "protein_coding"; exon_id "YDL223C.1";
IV	ensembl	CDS	57268	60405	.	-	0	gene_id "YDL223C"; transcript_id "YDL223C"; exon_number "1"; gene_name "HBT1"; gene_source "ensembl"; gene_biotype "protein_coding"; transcript_name "HBT1"; transcript_source "ensembl"; transcript_biotype "protein_coding"; protein_id "YDL223C";
IV	ensembl	start_codon	60403	60405	.	-	0	gene_id "YDL223C"; transcript_id "YDL223C"; exon_number "1"; gene_name "HBT1"; gene_source "ensembl"; gene_biotype "protein_coding"; transcript_name "HBT1"; transcript_source "ensembl"; transcript_biotype "protein_coding";
IV	ensembl	stop_codon	57265	57267	.	-	0	gene_id "YDL223C"; transcript_id "YDL223C"; exon_number "1"; gene_name "HBT1"; gene_source "ensembl"; gene_biotype "protein_coding"; transcript_name "HBT1"; transcript_source "ensembl"; transcript_biotype "protein_coding";
IV	ensembl	gene	60872	61801	.	-	.	gene_id "YDL222C"; gene_name "FMP45"; gene_source "ensembl"; gene_biotype "protein_coding";
IV	ensembl	transcript	60872	61801	.	-	.	gene_id "YDL222C"; transcript_id "YDL222C"; gene_name "FMP45"; gene_source "ensembl"; gene_biotype "protein_coding"; transcript_name "FMP45"; transcript_source "ensembl"; transcript_biotype "protein_coding";
IV	ensembl	exon	60872	61801	.	-	.	gene_id "YDL222C"; transcript_id "YDL222C"; exon_number "1"; gene_name "FMP45"; gene_source "ensembl"; gene_biotype "protein_coding"; transcript_name "FMP45"; transcript_source "ensembl"; transcript_biotype "protein_coding"; exon_id "YDL222C.1";
IV	ensembl	CDS	60875	61801	.	-	0	gene_id "YDL222C"; transcript_id "YDL222C"; exon_number "1"; gene_name "FMP45"; gene_source "ensembl"; gene_biotype "protein_coding"; transcript_name "FMP45"; transcript_source "ensembl"; transcript_biotype "protein_coding"; protein_id "YDL222C";
IV	ensembl	start_codon	61799	61801	.	-	0	gene_id "YDL222C"; transcript_id "YDL222C"; exon_number "1"; gene_name "FMP45"; gene_source "ensembl"; gene_biotype "protein_coding"; transcript_name "FMP45"; transcript_source "ensembl"; transcript_biotype "protein_coding";
IV	ensembl	stop_codon	60872	60874	.	-	0	gene_id "YDL222C"; transcript_id "YDL222C"; exon_number "1"; gene_name "FMP45"; gene_source "ensembl"; gene_biotype "protein_coding"; transcript_name "FMP45"; transcript_source "ensembl"; transcript_biotype "protein_coding";
IV	ensembl	gene	62011	62562	.	+	.	gene_id "YDL221W"; gene_source "ensembl"; gene_biotype "protein_coding";
IV	ensembl	transcript	62011	62562	.	+	.	gene_id "YDL221W"; transcript_id "YDL221W"; gene_source "ensembl"; gene_biotype "protein_coding"; transcript_name "YDL221W"; transcript_source "ensembl"; transcript_biotype "protein_coding";
IV	ensembl	exon	62011	62562	.	+	.	gene_id "YDL221W"; transcript_id "YDL221W"; exon_number "1"; gene_source "ensembl"; gene_biotype "protein_coding"; transcript_name "YDL221W"; transcript_source "ensembl"; transcript_biotype "protein_coding"; exon_id "YDL221W.1";
IV	ensembl	CDS	62011	62559	.	+	0	gene_id "YDL221W"; transcript_id "YDL221W"; exon_number "1"; gene_source "ensembl"; gene_biotype "protein_coding"; transcript_name "YDL221W"; transcript_source "ensembl"; transcript_biotype "protein_coding"; protein_id "YDL221W";
IV	ensembl	start_codon	62011	62013	.	+	0	gene_id "YDL221W"; transcript_id "YDL221W"; exon_number "1"; gene_source "ensembl"; gene_biotype "protein_coding"; transcript_name "YDL221W"; transcript_source "ensembl"; transcript_biotype "protein_coding";
IV	ensembl	stop_codon	62560	62562	.	+	0	gene_id "YDL221W"; transcript_id "YDL221W"; exon_number "1"; gene_source "ensembl"; gene_biotype "protein_coding"; transcript_name "YDL221W"; transcript_source "ensembl"; transcript_biotype "protein_coding";
IV	ensembl	gene	62244	65018	.	-	.	gene_id "YDL220C"; gene_name "CDC13"; gene_source "ensembl"; gene_biotype "protein_coding";
IV	ensembl	transcript	62244	65018	.	-	.	gene_id "YDL220C"; transcript_id "YDL220C"; gene_name "CDC13"; gene_source "ensembl"; gene_biotype "protein_coding"; transcript_name "CDC13"; transcript_source "ensembl"; transcript_biotype "protein_coding";
IV	ensembl	exon	62244	65018	.	-	.	gene_id "YDL220C"; transcript_id "YDL220C"; exon_number "1"; gene_name "CDC13"; gene_source "ensembl"; gene_biotype "protein_coding"; transcript_name "CDC13"; transcript_source "ensembl"; transcript_biotype "protein_coding"; exon_id "YDL220C.1";
IV	ensembl	CDS	62247	65018	.	-	0	gene_id "YDL220C"; transcript_id "YDL220C"; exon_number "1"; gene_name "CDC13"; gene_source "ensembl"; gene_biotype "protein_coding"; transcript_name "CDC13"; transcript_source "ensembl"; transcript_biotype "protein_coding"; protein_id "YDL220C";
IV	ensembl	start_codon	65016	65018	.	-	0	gene_id "YDL220C"; transcript_id "YDL220C"; exon_number "1"; gene_name "CDC13"; gene_source "ensembl"; gene_biotype "protein_coding"; transcript_name "CDC13"; transcript_source "ensembl"; transcript_biotype "protein_coding";
IV	ensembl	stop_codon	62244	62246	.	-	0	gene_id "YDL220C"; transcript_id "YDL220C"; exon_number "1"; gene_name "CDC13"; gene_source "ensembl"; gene_biotype "protein_coding"; transcript_name "CDC13"; transcript_source "ensembl"; transcript_biotype "protein_coding";
IV	ensembl	gene	65242	65765	.	+	.	gene_id "YDL219W"; gene_name "DTD1"; gene_source "ensembl"; gene_biotype "protein_coding";
IV	ensembl	transcript	65242	65765	.	+	.	gene_id "YDL219W"; transcript_id "YDL219W"; gene_name "DTD1"; gene_source "ensembl"; gene_biotype "protein_coding"; transcript_name "DTD1"; transcript_source "ensembl"; transcript_biotype "protein_coding";
IV	ensembl	exon	65242	65306	.	+	.	gene_id "YDL219W"; transcript_id "YDL219W"; exon_number "1"; gene_name "DTD1"; gene_source "ensembl"; gene_biotype "protein_coding"; transcript_name "DTD1"; transcript_source "ensembl"; transcript_biotype "protein_coding"; exon_id "YDL219W.1";
IV	ensembl	CDS	65242	65306	.	+	0	gene_id "YDL219W"; transcript_id "YDL219W"; exon_number "1"; gene_name "DTD1"; gene_source "ensembl"; gene_biotype "protein_coding"; transcript_name "DTD1"; transcript_source "ensembl"; transcript_biotype "protein_coding"; protein_id "YDL219W";
IV	ensembl	start_codon	65242	65244	.	+	0	gene_id "YDL219W"; transcript_id "YDL219W"; exon_number "1"; gene_name "DTD1"; gene_source "ensembl"; gene_biotype "protein_coding"; transcript_name "DTD1"; transcript_source "ensembl"; transcript_biotype "protein_coding";
IV	ensembl	exon	65378	65765	.	+	.	gene_id "YDL219W"; transcript_id "YDL219W"; exon_number "2"; gene_name "DTD1"; gene_source "ensembl"; gene_biotype "protein_coding"; transcript_name "DTD1"; transcript_source "ensembl"; transcript_biotype "protein_coding"; exon_id "YDL219W.2";
IV	ensembl	CDS	65378	65765	.	+	2	gene_id "YDL219W"; transcript_id "YDL219W"; exon_number "2"; gene_name "DTD1"; gene_source "ensembl"; gene_biotype "protein_coding"; transcript_name "DTD1"; transcript_source "ensembl"; transcript_biotype "protein_coding"; protein_id "YDL219W";
IV	ensembl	gene	66493	67446	.	+	.	gene_id "YDL218W"; gene_source "ensembl"; gene_biotype "protein_coding";
IV	ensembl	transcript	66493	67446	.	+	.	gene_id "YDL218W"; transcript_id "YDL218W"; gene_source "ensembl"; gene_biotype "protein_coding"; transcript_name "YDL218W"; transcript_source "ensembl"; transcript_biotype "protein_coding";
IV	ensembl	exon	66493	67446	.	+	.	gene_id "YDL218W"; transcript_id "YDL218W"; exon_number "1"; gene_source "ensembl"; gene_biotype "protein_coding"; transcript_name "YDL218W"; transcript_source "ensembl"; transcript_biotype "protein_coding"; exon_id "YDL218W.1";
IV	ensembl	CDS	66493	67443	.	+	0	gene_id "YDL218W"; transcript_id "YDL218W"; exon_number "1"; gene_source "ensembl"; gene_biotype "protein_coding"; transcript_name "YDL218W"; transcript_source "ensembl"; transcript_biotype "protein_coding"; protein_id "YDL218W";
IV	ensembl	start_codon	66493	66495	.	+	0	gene_id "YDL218W"; transcript_id "YDL218W"; exon_number "1"; gene_source "ensembl"; gene_biotype "protein_coding"; transcript_name "YDL218W"; transcript_source "ensembl"; transcript_biotype "protein_coding";
IV	ensembl	stop_codon	67444	67446	.	+	0	gene_id "YDL218W"; transcript_id "YDL218W"; exon_number "1"; gene_source "ensembl"; gene_biotype "protein_coding"; transcript_name "YDL218W"; transcript_source "ensembl"; transcript_biotype "protein_coding";
IV	ensembl	gene	67983	68606	.	-	.	gene_id "YDL217C"; gene_name "TIM22"; gene_source "ensembl"; gene_biotype "protein_coding";
IV	ensembl	transcript	67983	68606	.	-	.	gene_id "YDL217C"; transcript_id "YDL217C"; gene_name "TIM22"; gene_source "ensembl"; gene_biotype "protein_coding"; transcript_name "TIM22"; transcript_source "ensembl"; transcript_biotype "protein_coding";
IV	ensembl	exon	67983	68606	.	-	.	gene_id "YDL217C"; transcript_id "YDL217C"; exon_number "1"; gene_name "TIM22"; gene_source "ensembl"; gene_biotype "protein_coding"; transcript_name "TIM22"; transcript_source "ensembl"; transcript_biotype "protein_coding"; exon_id "YDL217C.1";
IV	ensembl	CDS	67986	68606	.	-	0	gene_id "YDL217C"; transcript_id "YDL217C"; exon_number "1"; gene_name "TIM22"; gene_source "ensembl"; gene_biotype "protein_coding"; transcript_name "TIM22"; transcript_source "ensembl"; transcript_biotype "protein_coding"; protein_id "YDL217C";
IV	ensembl	start_codon	68604	68606	.	-	0	gene_id "YDL217C"; transcript_id "YDL217C"; exon_number "1"; gene_name "TIM22"; gene_source "ensembl"; gene_biotype "protein_coding"; transcript_name "TIM22"; transcript_source "ensembl"; transcript_biotype "protein_coding";
IV	ensembl	stop_codon	67983	67985	.	-	0	gene_id "YDL217C"; transcript_id "YDL217C"; exon_number "1"; gene_name "TIM22"; gene_source "ensembl"; gene_biotype "protein_coding"; transcript_name "TIM22"; transcript_source "ensembl"; transcript_biotype "protein_coding";
IV	ensembl	gene	68997	70319	.	-	.	gene_id "YDL216C"; gene_name "RRI1"; gene_source "ensembl"; gene_biotype "protein_coding";
IV	ensembl	transcript	68997	70319	.	-	.	gene_id "YDL216C"; transcript_id "YDL216C"; gene_name "RRI1"; gene_source "ensembl"; gene_biotype "protein_coding"; transcript_name "RRI1"; transcript_source "ensembl"; transcript_biotype "protein_coding";
IV	ensembl	exon	68997	70319	.	-	.	gene_id "YDL216C"; transcript_id "YDL216C"; exon_number "1"; gene_name "RRI1"; gene_source "ensembl"; gene_biotype "protein_coding"; transcript_name "RRI1"; transcript_source "ensembl"; transcript_biotype "protein_coding"; exon_id "YDL216C.1";
IV	ensembl	CDS	69000	70319	.	-	0	gene_id "YDL216C"; transcript_id "YDL216C"; exon_number "1"; gene_name "RRI1"; gene_source "ensembl"; gene_biotype "protein_coding"; transcript_name "RRI1"; transcript_source "ensembl"; transcript_biotype "protein_coding"; protein_id "YDL216C";
IV	ensembl	start_codon	70317	70319	.	-	0	gene_id "YDL216C"; transcript_id "YDL216C"; exon_number "1"; gene_name "RRI1"; gene_source "ensembl"; gene_biotype "protein_coding"; transcript_name "RRI1"; transcript_source "ensembl"; transcript_biotype "protein_coding";
IV	ensembl	stop_codon	68997	68999	.	-	0	gene_id "YDL216C"; transcript_id "YDL216C"; exon_number "1"; gene_name "RRI1"; gene_source "ensembl"; gene_biotype "protein_coding"; transcript_name "RRI1"; transcript_source "ensembl"; transcript_biotype "protein_coding";
IV	ensembl	gene	70640	73918	.	-	.	gene_id "YDL215C"; gene_name "GDH2"; gene_source "ensembl"; gene_biotype "protein_coding";
IV	ensembl	transcript	70640	73918	.	-	.	gene_id "YDL215C"; transcript_id "YDL215C"; gene_name "GDH2"; gene_source "ensembl"; gene_biotype "protein_coding"; transcript_name "GDH2"; transcript_source "ensembl"; transcript_biotype "protein_coding";
IV	ensembl	exon	70640	73918	.	-	.	gene_id "YDL215C"; transcript_id "YDL215C"; exon_number "1"; gene_name "GDH2"; gene_source "ensembl"; gene_biotype "protein_coding"; transcript_name "GDH2"; transcript_source "ensembl"; transcript_biotype "protein_coding"; exon_id "YDL215C.1";
IV	ensembl	CDS	70643	73918	.	-	0	gene_id "YDL215C"; transcript_id "YDL215C"; exon_number "1"; gene_name "GDH2"; gene_source "ensembl"; gene_biotype "protein_coding"; transcript_name "GDH2"; transcript_source "ensembl"; transcript_biotype "protein_coding"; protein_id "YDL215C";
IV	ensembl	start_codon	73916	73918	.	-	0	gene_id "YDL215C"; transcript_id "YDL215C"; exon_number "1"; gene_name "GDH2"; gene_source "ensembl"; gene_biotype "protein_coding"; transcript_name "GDH2"; transcript_source "ensembl"; transcript_biotype "protein_coding";
IV	ensembl	stop_codon	70640	70642	.	-	0	gene_id "YDL215C"; transcript_id "YDL215C"; exon_number "1"; gene_name "GDH2"; gene_source "ensembl"; gene_biotype "protein_coding"; transcript_name "GDH2"; transcript_source "ensembl"; transcript_biotype "protein_coding";
IV	ensembl	gene	74446	76545	.	-	.	gene_id "YDL214C"; gene_name "PRR2"; gene_source "ensembl"; gene_biotype "protein_coding";
IV	ensembl	transcript	74446	76545	.	-	.	gene_id "YDL214C"; transcript_id "YDL214C"; gene_name "PRR2"; gene_source "ensembl"; gene_biotype "protein_coding"; transcript_name "PRR2"; transcript_source "ensembl"; transcript_biotype "protein_coding";
IV	ensembl	exon	74446	76545	.	-	.	gene_id "YDL214C"; transcript_id "YDL214C"; exon_number "1"; gene_name "PRR2"; gene_source "ensembl"; gene_biotype "protein_coding"; transcript_name "PRR2"; transcript_source "ensembl"; transcript_biotype "protein_coding"; exon_id "YDL214C.1";
IV	ensembl	CDS	74449	76545	.	-	0	gene_id "YDL214C"; transcript_id "YDL214C"; exon_number "1"; gene_name "PRR2"; gene_source "ensembl"; gene_biotype "protein_coding"; transcript_name "PRR2"; transcript_source "ensembl"; transcript_biotype "protein_coding"; protein_id "YDL214C";
IV	ensembl	start_codon	76543	76545	.	-	0	gene_id "YDL214C"; transcript_id "YDL214C"; exon_number "1"; gene_name "PRR2"; gene_source "ensembl"; gene_biotype "protein_coding"; transcript_name "PRR2"; transcript_source "ensembl"; transcript_biotype "protein_coding";
IV	ensembl	stop_codon	74446	74448	.	-	0	gene_id "YDL214C"; transcript_id "YDL214C"; exon_number "1"; gene_name "PRR2"; gene_source "ensembl"; gene_biotype "protein_coding"; transcript_name "PRR2"; transcript_source "ensembl"; transcript_biotype "protein_coding";
IV	ensembl	gene	77289	77966	.	-	.	gene_id "YDL213C"; gene_name "NOP6"; gene_source "ensembl"; gene_biotype "protein_coding";
IV	ensembl	transcript	77289	77966	.	-	.	gene_id "YDL213C"; transcript_id "YDL213C"; gene_name "NOP6"; gene_source "ensembl"; gene_biotype "protein_coding"; transcript_name "NOP6"; transcript_source "ensembl"; transcript_biotype "protein_coding";
IV	ensembl	exon	77289	77966	.	-	.	gene_id "YDL213C"; transcript_id "YDL213C"; exon_number "1"; gene_name "NOP6"; gene_source "ensembl"; gene_biotype "protein_coding"; transcript_name "NOP6"; transcript_source "ensembl"; transcript_biotype "protein_coding"; exon_id "YDL213C.1";
IV	ensembl	CDS	77292	77966	.	-	0	gene_id "YDL213C"; transcript_id "YDL213C"; exon_number "1"; gene_name "NOP6"; gene_source "ensembl"; gene_biotype "protein_coding"; transcript_name "NOP6"; transcript_source "ensembl"; transcript_biotype "protein_coding"; protein_id "YDL213C";
IV	ensembl	start_codon	77964	77966	.	-	0	gene_id "YDL213C"; transcript_id "YDL213C"; exon_number "1"; gene_name "NOP6"; gene_source "ensembl"; gene_biotype "protein_coding"; transcript_name "NOP6"; transcript_source "ensembl"; transcript_biotype "protein_coding";
IV	ensembl	stop_codon	77289	77291	.	-	0	gene_id "YDL213C"; transcript_id "YDL213C"; exon_number "1"; gene_name "NOP6"; gene_source "ensembl"; gene_biotype "protein_coding"; transcript_name "NOP6"; transcript_source "ensembl"; transcript_biotype "protein_coding";
IV	ensembl	gene	78426	79058	.	+	.	gene_id "YDL212W"; gene_name "SHR3"; gene_source "ensembl"; gene_biotype "protein_coding";
IV	ensembl	transcript	78426	79058	.	+	.	gene_id "YDL212W"; transcript_id "YDL212W"; gene_name "SHR3"; gene_source "ensembl"; gene_biotype "protein_coding"; transcript_name "SHR3"; transcript_source "ensembl"; transcript_biotype "protein_coding";
IV	ensembl	exon	78426	79058	.	+	.	gene_id "YDL212W"; transcript_id "YDL212W"; exon_number "1"; gene_name "SHR3"; gene_source "ensembl"; gene_biotype "protein_coding"; transcript_name "SHR3"; transcript_source "ensembl"; transcript_biotype "protein_coding"; exon_id "YDL212W.1";
IV	ensembl	CDS	78426	79055	.	+	0	gene_id "YDL212W"; transcript_id "YDL212W"; exon_number "1"; gene_name "SHR3"; gene_source "ensembl"; gene_biotype "protein_coding"; transcript_name "SHR3"; transcript_source "ensembl"; transcript_biotype "protein_coding"; protein_id "YDL212W";
IV	ensembl	start_codon	78426	78428	.	+	0	gene_id "YDL212W"; transcript_id "YDL212W"; exon_number "1"; gene_name "SHR3"; gene_source "ensembl"; gene_biotype "protein_coding"; transcript_name "SHR3"; transcript_source "ensembl"; transcript_biotype "protein_coding";
IV	ensembl	stop_codon	79056	79058	.	+	0	gene_id "YDL212W"; transcript_id "YDL212W"; exon_number "1"; gene_name "SHR3"; gene_source "ensembl"; gene_biotype "protein_coding"; transcript_name "SHR3"; transcript_source "ensembl"; transcript_biotype "protein_coding";
IV	ensembl	gene	79294	80412	.	-	.	gene_id "YDL211C"; gene_source "ensembl"; gene_biotype "protein_coding";
IV	ensembl	transcript	79294	80412	.	-	.	gene_id "YDL211C"; transcript_id "YDL211C"; gene_source "ensembl"; gene_biotype "protein_coding"; transcript_name "YDL211C"; transcript_source "ensembl"; transcript_biotype "protein_coding";
IV	ensembl	exon	79294	80412	.	-	.	gene_id "YDL211C"; transcript_id "YDL211C"; exon_number "1"; gene_source "ensembl"; gene_biotype "protein_coding"; transcript_name "YDL211C"; transcript_source "ensembl"; transcript_biotype "protein_coding"; exon_id "YDL211C.1";
IV	ensembl	CDS	79297	80412	.	-	0	gene_id "YDL211C"; transcript_id "YDL211C"; exon_number "1"; gene_source "ensembl"; gene_biotype "protein_coding"; transcript_name "YDL211C"; transcript_source "ensembl"; transcript_biotype "protein_coding"; protein_id "YDL211C";
IV	ensembl	start_codon	80410	80412	.	-	0	gene_id "YDL211C"; transcript_id "YDL211C"; exon_number "1"; gene_source "ensembl"; gene_biotype "protein_coding"; transcript_name "YDL211C"; transcript_source "ensembl"; transcript_biotype "protein_coding";
IV	ensembl	stop_codon	79294	79296	.	-	0	gene_id "YDL211C"; transcript_id "YDL211C"; exon_number "1"; gene_source "ensembl"; gene_biotype "protein_coding"; transcript_name "YDL211C"; transcript_source "ensembl"; transcript_biotype "protein_coding";
IV	ensembl	gene	83548	83618	.	+	.	gene_id "tG(GCC)D1"; gene_source "ensembl"; gene_biotype "tRNA";
IV	ensembl	transcript	83548	83618	.	+	.	gene_id "tG(GCC)D1"; transcript_id "tG(GCC)D1"; gene_source "ensembl"; gene_biotype "tRNA"; transcript_name "tG(GCC)D1"; transcript_source "ensembl"; transcript_biotype "tRNA";
IV	ensembl	exon	83548	83618	.	+	.	gene_id "tG(GCC)D1"; transcript_id "tG(GCC)D1"; exon_number "1"; gene_source "ensembl"; gene_biotype "tRNA"; transcript_name "tG(GCC)D1"; transcript_source "ensembl"; transcript_biotype "tRNA"; exon_id "tG(GCC)D1.1";
IV	ensembl	gene	84270	85985	.	+	.	gene_id "YDL210W"; gene_name "UGA4"; gene_source "ensembl"; gene_biotype "protein_coding";
IV	ensembl	transcript	84270	85985	.	+	.	gene_id "YDL210W"; transcript_id "YDL210W"; gene_name "UGA4"; gene_source "ensembl"; gene_biotype "protein_coding"; transcript_name "UGA4"; transcript_source "ensembl"; transcript_biotype "protein_coding";
IV	ensembl	exon	84270	85985	.	+	.	gene_id "YDL210W"; transcript_id "YDL210W"; exon_number "1"; gene_name "UGA4"; gene_source "ensembl"; gene_biotype "protein_coding"; transcript_name "UGA4"; transcript_source "ensembl"; transcript_biotype "protein_coding"; exon_id "YDL210W.1";
IV	ensembl	CDS	84270	85982	.	+	0	gene_id "YDL210W"; transcript_id "YDL210W"; exon_number "1"; gene_name "UGA4"; gene_source "ensembl"; gene_biotype "protein_coding"; transcript_name "UGA4"; transcript_source "ensembl"; transcript_biotype "protein_coding"; protein_id "YDL210W";
IV	ensembl	start_codon	84270	84272	.	+	0	gene_id "YDL210W"; transcript_id "YDL210W"; exon_number "1"; gene_name "UGA4"; gene_source "ensembl"; gene_biotype "protein_coding"; transcript_name "UGA4"; transcript_source "ensembl"; transcript_biotype "protein_coding";
IV	ensembl	stop_codon	85983	85985	.	+	0	gene_id "YDL210W"; transcript_id "YDL210W"; exon_number "1"; gene_name "UGA4"; gene_source "ensembl"; gene_biotype "protein_coding"; transcript_name "UGA4"; transcript_source "ensembl"; transcript_biotype "protein_coding";
IV	ensembl	gene	86207	87226	.	-	.	gene_id "YDL209C"; gene_name "CWC2"; gene_source "ensembl"; gene_biotype "protein_coding";
IV	ensembl	transcript	86207	87226	.	-	.	gene_id "YDL209C"; transcript_id "YDL209C"; gene_name "CWC2"; gene_source "ensembl"; gene_biotype "protein_coding"; transcript_name "CWC2"; transcript_source "ensembl"; transcript_biotype "protein_coding";
IV	ensembl	exon	86207	87226	.	-	.	gene_id "YDL209C"; transcript_id "YDL209C"; exon_number "1"; gene_name "CWC2"; gene_source "ensembl"; gene_biotype "protein_coding"; transcript_name "CWC2"; transcript_source "ensembl"; transcript_biotype "protein_coding"; exon_id "YDL209C.1";
IV	ensembl	CDS	86210	87226	.	-	0	gene_id "YDL209C"; transcript_id "YDL209C"; exon_number "1"; gene_name "CWC2"; gene_source "ensembl"; gene_biotype "protein_coding"; transcript_name "CWC2"; transcript_source "ensembl"; transcript_biotype "protein_coding"; protein_id "YDL209C";
IV	ensembl	start_codon	87224	87226	.	-	0	gene_id "YDL209C"; transcript_id "YDL209C"; exon_number "1"; gene_name "CWC2"; gene_source "ensembl"; gene_biotype "protein_coding"; transcript_name "CWC2"; transcript_source "ensembl"; transcript_biotype "protein_coding";
IV	ensembl	stop_codon	86207	86209	.	-	0	gene_id "YDL209C"; transcript_id "YDL209C"; exon_number "1"; gene_name "CWC2"; gene_source "ensembl"; gene_biotype "protein_coding"; transcript_name "CWC2"; transcript_source "ensembl"; transcript_biotype "protein_coding";
IV	ensembl	gene	87512	87982	.	+	.	gene_id "YDL208W"; gene_name "NHP2"; gene_source "ensembl"; gene_biotype "protein_coding";
IV	ensembl	transcript	87512	87982	.	+	.	gene_id "YDL208W"; transcript_id "YDL208W"; gene_name "NHP2"; gene_source "ensembl"; gene_biotype "protein_coding"; transcript_name "NHP2"; transcript_source "ensembl"; transcript_biotype "protein_coding";
IV	ensembl	exon	87512	87982	.	+	.	gene_id "YDL208W"; transcript_id "YDL208W"; exon_number "1"; gene_name "NHP2"; gene_source "ensembl"; gene_biotype "protein_coding"; transcript_name "NHP2"; transcript_source "ensembl"; transcript_biotype "protein_coding"; exon_id "YDL208W.1";
IV	ensembl	CDS	87512	87979	.	+	0	gene_id "YDL208W"; transcript_id "YDL208W"; exon_number "1"; gene_name "NHP2"; gene_source "ensembl"; gene_biotype "protein_coding"; transcript_name "NHP2"; transcript_source "ensembl"; transcript_biotype "protein_coding"; protein_id "YDL208W";
IV	ensembl	start_codon	87512	87514	.	+	0	gene_id "YDL208W"; transcript_id "YDL208W"; exon_number "1"; gene_name "NHP2"; gene_source "ensembl"; gene_biotype "protein_coding"; transcript_name "NHP2"; transcript_source "ensembl"; transcript_biotype "protein_coding";
IV	ensembl	stop_codon	87980	87982	.	+	0	gene_id "YDL208W"; transcript_id "YDL208W"; exon_number "1"; gene_name "NHP2"; gene_source "ensembl"; gene_biotype "protein_coding"; transcript_name "NHP2"; transcript_source "ensembl"; transcript_biotype "protein_coding";
IV	ensembl	gene	88248	89864	.	+	.	gene_id "YDL207W"; gene_name "GLE1"; gene_source "ensembl"; gene_biotype "protein_coding";
IV	ensembl	transcript	88248	89864	.	+	.	gene_id "YDL207W"; transcript_id "YDL207W"; gene_name "GLE1"; gene_source "ensembl"; gene_biotype "protein_coding"; transcript_name "GLE1"; transcript_source "ensembl"; transcript_biotype "protein_coding";
IV	ensembl	exon	88248	89864	.	+	.	gene_id "YDL207W"; transcript_id "YDL207W"; exon_number "1"; gene_name "GLE1"; gene_source "ensembl"; gene_biotype "protein_coding"; transcript_name "GLE1"; transcript_source "ensembl"; transcript_biotype "protein_coding"; exon_id "YDL207W.1";
IV	ensembl	CDS	88248	89861	.	+	0	gene_id "YDL207W"; transcript_id "YDL207W"; exon_number "1"; gene_name "GLE1"; gene_source "ensembl"; gene_biotype "protein_coding"; transcript_name "GLE1"; transcript_source "ensembl"; transcript_biotype "protein_coding"; protein_id "YDL207W";
IV	ensembl	start_codon	88248	88250	.	+	0	gene_id "YDL207W"; transcript_id "YDL207W"; exon_number "1"; gene_name "GLE1"; gene_source "ensembl"; gene_biotype "protein_coding"; transcript_name "GLE1"; transcript_source "ensembl"; transcript_biotype "protein_coding";
IV	ensembl	stop_codon	89862	89864	.	+	0	gene_id "YDL207W"; transcript_id "YDL207W"; exon_number "1"; gene_name "GLE1"; gene_source "ensembl"; gene_biotype "protein_coding"; transcript_name "GLE1"; transcript_source "ensembl"; transcript_biotype "protein_coding";
IV	ensembl	gene	90176	92464	.	+	.	gene_id "YDL206W"; gene_source "ensembl"; gene_biotype "protein_coding";
IV	ensembl	transcript	90176	92464	.	+	.	gene_id "YDL206W"; transcript_id "YDL206W"; gene_source "ensembl"; gene_biotype "protein_coding"; transcript_name "YDL206W"; transcript_source "ensembl"; transcript_biotype "protein_coding";
IV	ensembl	exon	90176	92464	.	+	.	gene_id "YDL206W"; transcript_id "YDL206W"; exon_number "1"; gene_source "ensembl"; gene_biotype "protein_coding"; transcript_name "YDL206W"; transcript_source "ensembl"; transcript_biotype "protein_coding"; exon_id "YDL206W.1";
IV	ensembl	CDS	90176	92461	.	+	0	gene_id "YDL206W"; transcript_id "YDL206W"; exon_number "1"; gene_source "ensembl"; gene_biotype "protein_coding"; transcript_name "YDL206W"; transcript_source "ensembl"; transcript_biotype "protein_coding"; protein_id "YDL206W";
IV	ensembl	start_codon	90176	90178	.	+	0	gene_id "YDL206W"; transcript_id "YDL206W"; exon_number "1"; gene_source "ensembl"; gene_biotype "protein_coding"; transcript_name "YDL206W"; transcript_source "ensembl"; transcript_biotype "protein_coding";
IV	ensembl	stop_codon	92462	92464	.	+	0	gene_id "YDL206W"; transcript_id "YDL206W"; exon_number "1"; gene_source "ensembl"; gene_biotype "protein_coding"; transcript_name "YDL206W"; transcript_source "ensembl"; transcript_biotype "protein_coding";
IV	ensembl	gene	92762	93745	.	-	.	gene_id "YDL205C"; gene_name "HEM3"; gene_source "ensembl"; gene_biotype "protein_coding";
IV	ensembl	transcript	92762	93745	.	-	.	gene_id "YDL205C"; transcript_id "YDL205C"; gene_name "HEM3"; gene_source "ensembl"; gene_biotype "protein_coding"; transcript_name "HEM3"; transcript_source "ensembl"; transcript_biotype "protein_coding";
IV	ensembl	exon	92762	93745	.	-	.	gene_id "YDL205C"; transcript_id "YDL205C"; exon_number "1"; gene_name "HEM3"; gene_source "ensembl"; gene_biotype "protein_coding"; transcript_name "HEM3"; transcript_source "ensembl"; transcript_biotype "protein_coding"; exon_id "YDL205C.1";
IV	ensembl	CDS	92765	93745	.	-	0	gene_id "YDL205C"; transcript_id "YDL205C"; exon_number "1"; gene_name "HEM3"; gene_source "ensembl"; gene_biotype "protein_coding"; transcript_name "HEM3"; transcript_source "ensembl"; transcript_biotype "protein_coding"; protein_id "YDL205C";
IV	ensembl	start_codon	93743	93745	.	-	0	gene_id "YDL205C"; transcript_id "YDL205C"; exon_number "1"; gene_name "HEM3"; gene_source "ensembl"; gene_biotype "protein_coding"; transcript_name "HEM3"; transcript_source "ensembl"; transcript_biotype "protein_coding";
IV	ensembl	stop_codon	92762	92764	.	-	0	gene_id "YDL205C"; transcript_id "YDL205C"; exon_number "1"; gene_name "HEM3"; gene_source "ensembl"; gene_biotype "protein_coding"; transcript_name "HEM3"; transcript_source "ensembl"; transcript_biotype "protein_coding";
IV	ensembl	gene	94605	95786	.	+	.	gene_id "YDL204W"; gene_name "RTN2"; gene_source "ensembl"; gene_biotype "protein_coding";
IV	ensembl	transcript	94605	95786	.	+	.	gene_id "YDL204W"; transcript_id "YDL204W"; gene_name "RTN2"; gene_source "ensembl"; gene_biotype "protein_coding"; transcript_name "RTN2"; transcript_source "ensembl"; transcript_biotype "protein_coding";
IV	ensembl	exon	94605	95786	.	+	.	gene_id "YDL204W"; transcript_id "YDL204W"; exon_number "1"; gene_name "RTN2"; gene_source "ensembl"; gene_biotype "protein_coding"; transcript_name "RTN2"; transcript_source "ensembl"; transcript_biotype "protein_coding"; exon_id "YDL204W.1";
IV	ensembl	CDS	94605	95783	.	+	0	gene_id "YDL204W"; transcript_id "YDL204W"; exon_number "1"; gene_name "RTN2"; gene_source "ensembl"; gene_biotype "protein_coding"; transcript_name "RTN2"; transcript_source "ensembl"; transcript_biotype "protein_coding"; protein_id "YDL204W";
IV	ensembl	start_codon	94605	94607	.	+	0	gene_id "YDL204W"; transcript_id "YDL204W"; exon_number "1"; gene_name "RTN2"; gene_source "ensembl"; gene_biotype "protein_coding"; transcript_name "RTN2"; transcript_source "ensembl"; transcript_biotype "protein_coding";
IV	ensembl	stop_codon	95784	95786	.	+	0	gene_id "YDL204W"; transcript_id "YDL204W"; exon_number "1"; gene_name "RTN2"; gene_source "ensembl"; gene_biotype "protein_coding"; transcript_name "RTN2"; transcript_source "ensembl"; transcript_biotype "protein_coding";
IV	ensembl	gene	96082	97953	.	-	.	gene_id "YDL203C"; gene_name "ACK1"; gene_source "ensembl"; gene_biotype "protein_coding";
IV	ensembl	transcript	96082	97953	.	-	.	gene_id "YDL203C"; transcript_id "YDL203C"; gene_name "ACK1"; gene_source "ensembl"; gene_biotype "protein_coding"; transcript_name "ACK1"; transcript_source "ensembl"; transcript_biotype "protein_coding";
IV	ensembl	exon	96082	97953	.	-	.	gene_id "YDL203C"; transcript_id "YDL203C"; exon_number "1"; gene_name "ACK1"; gene_source "ensembl"; gene_biotype "protein_coding"; transcript_name "ACK1"; transcript_source "ensembl"; transcript_biotype "protein_coding"; exon_id "YDL203C.1";
IV	ensembl	CDS	96085	97953	.	-	0	gene_id "YDL203C"; transcript_id "YDL203C"; exon_number "1"; gene_name "ACK1"; gene_source "ensembl"; gene_biotype "protein_coding"; transcript_name "ACK1"; transcript_source "ensembl"; transcript_biotype "protein_coding"; protein_id "YDL203C";
IV	ensembl	start_codon	97951	97953	.	-	0	gene_id "YDL203C"; transcript_id "YDL203C"; exon_number "1"; gene_name "ACK1"; gene_source "ensembl"; gene_biotype "protein_coding"; transcript_name "ACK1"; transcript_source "ensembl"; transcript_biotype "protein_coding";
IV	ensembl	stop_codon	96082	96084	.	-	0	gene_id "YDL203C"; transcript_id "YDL203C"; exon_number "1"; gene_name "ACK1"; gene_source "ensembl"; gene_biotype "protein_coding"; transcript_name "ACK1"; transcript_source "ensembl"; transcript_biotype "protein_coding";
IV	ensembl	gene	98475	99224	.	+	.	gene_id "YDL202W"; gene_name "MRPL11"; gene_source "ensembl"; gene_biotype "protein_coding";
IV	ensembl	transcript	98475	99224	.	+	.	gene_id "YDL202W"; transcript_id "YDL202W"; gene_name "MRPL11"; gene_source "ensembl"; gene_biotype "protein_coding"; transcript_name "MRPL11"; transcript_source "ensembl"; transcript_biotype "protein_coding";
IV	ensembl	exon	98475	99224	.	+	.	gene_id "YDL202W"; transcript_id "YDL202W"; exon_number "1"; gene_name "MRPL11"; gene_source "ensembl"; gene_biotype "protein_coding"; transcript_name "MRPL11"; transcript_source "ensembl"; transcript_biotype "protein_coding"; exon_id "YDL202W.1";
IV	ensembl	CDS	98475	99221	.	+	0	gene_id "YDL202W"; transcript_id "YDL202W"; exon_number "1"; gene_name "MRPL11"; gene_source "ensembl"; gene_biotype "protein_coding"; transcript_name "MRPL11"; transcript_source "ensembl"; transcript_biotype "protein_coding"; protein_id "YDL202W";
IV	ensembl	start_codon	98475	98477	.	+	0	gene_id "YDL202W"; transcript_id "YDL202W"; exon_number "1"; gene_name "MRPL11"; gene_source "ensembl"; gene_biotype "protein_coding"; transcript_name "MRPL11"; transcript_source "ensembl"; transcript_biotype "protein_coding";
IV	ensembl	stop_codon	99222	99224	.	+	0	gene_id "YDL202W"; transcript_id "YDL202W"; exon_number "1"; gene_name "MRPL11"; gene_source "ensembl"; gene_biotype "protein_coding"; transcript_name "MRPL11"; transcript_source "ensembl"; transcript_biotype "protein_coding";
IV	ensembl	gene	99561	100421	.	+	.	gene_id "YDL201W"; gene_name "TRM8"; gene_source "ensembl"; gene_biotype "protein_coding";
IV	ensembl	transcript	99561	100421	.	+	.	gene_id "YDL201W"; transcript_id "YDL201W"; gene_name "TRM8"; gene_source "ensembl"; gene_biotype "protein_coding"; transcript_name "TRM8"; transcript_source "ensembl"; transcript_biotype "protein_coding";
IV	ensembl	exon	99561	100421	.	+	.	gene_id "YDL201W"; transcript_id "YDL201W"; exon_number "1"; gene_name "TRM8"; gene_source "ensembl"; gene_biotype "protein_coding"; transcript_name "TRM8"; transcript_source "ensembl"; transcript_biotype "protein_coding"; exon_id "YDL201W.1";
IV	ensembl	CDS	99561	100418	.	+	0	gene_id "YDL201W"; transcript_id "YDL201W"; exon_number "1"; gene_name "TRM8"; gene_source "ensembl"; gene_biotype "protein_coding"; transcript_name "TRM8"; transcript_source "ensembl"; transcript_biotype "protein_coding"; protein_id "YDL201W";
IV	ensembl	start_codon	99561	99563	.	+	0	gene_id "YDL201W"; transcript_id "YDL201W"; exon_number "1"; gene_name "TRM8"; gene_source "ensembl"; gene_biotype "protein_coding"; transcript_name "TRM8"; transcript_source "ensembl"; transcript_biotype "protein_coding";
IV	ensembl	stop_codon	100419	100421	.	+	0	gene_id "YDL201W"; transcript_id "YDL201W"; exon_number "1"; gene_name "TRM8"; gene_source "ensembl"; gene_biotype "protein_coding"; transcript_name "TRM8"; transcript_source "ensembl"; transcript_biotype "protein_coding";
IV	ensembl	gene	100501	101067	.	-	.	gene_id "YDL200C"; gene_name "MGT1"; gene_source "ensembl"; gene_biotype "protein_coding";
IV	ensembl	transcript	100501	101067	.	-	.	gene_id "YDL200C"; transcript_id "YDL200C"; gene_name "MGT1"; gene_source "ensembl"; gene_biotype "protein_coding"; transcript_name "MGT1"; transcript_source "ensembl"; transcript_biotype "protein_coding";
IV	ensembl	exon	100501	101067	.	-	.	gene_id "YDL200C"; transcript_id "YDL200C"; exon_number "1"; gene_name "MGT1"; gene_source "ensembl"; gene_biotype "protein_coding"; transcript_name "MGT1"; transcript_source "ensembl"; transcript_biotype "protein_coding"; exon_id "YDL200C.1";
IV	ensembl	CDS	100504	101067	.	-	0	gene_id "YDL200C"; transcript_id "YDL200C"; exon_number "1"; gene_name "MGT1"; gene_source "ensembl"; gene_biotype "protein_coding"; transcript_name "MGT1"; transcript_source "ensembl"; transcript_biotype "protein_coding"; protein_id "YDL200C";
IV	ensembl	start_codon	101065	101067	.	-	0	gene_id "YDL200C"; transcript_id "YDL200C"; exon_number "1"; gene_name "MGT1"; gene_source "ensembl"; gene_biotype "protein_coding"; transcript_name "MGT1"; transcript_source "ensembl"; transcript_biotype "protein_coding";
IV	ensembl	stop_codon	100501	100503	.	-	0	gene_id "YDL200C"; transcript_id "YDL200C"; exon_number "1"; gene_name "MGT1"; gene_source "ensembl"; gene_biotype "protein_coding"; transcript_name "MGT1"; transcript_source "ensembl"; transcript_biotype "protein_coding";
IV	ensembl	gene	101290	103353	.	-	.	gene_id "YDL199C"; gene_source "ensembl"; gene_biotype "protein_coding";
IV	ensembl	transcript	101290	103353	.	-	.	gene_id "YDL199C"; transcript_id "YDL199C"; gene_source "ensembl"; gene_biotype "protein_coding"; transcript_name "YDL199C"; transcript_source "ensembl"; transcript_biotype "protein_coding";
IV	ensembl	exon	101290	103353	.	-	.	gene_id "YDL199C"; transcript_id "YDL199C"; exon_number "1"; gene_source "ensembl"; gene_biotype "protein_coding"; transcript_name "YDL199C"; transcript_source "ensembl"; transcript_biotype "protein_coding"; exon_id "YDL199C.1";
IV	ensembl	CDS	101293	103353	.	-	0	gene_id "YDL199C"; transcript_id "YDL199C"; exon_number "1"; gene_source "ensembl"; gene_biotype "protein_coding"; transcript_name "YDL199C"; transcript_source "ensembl"; transcript_biotype "protein_coding"; protein_id "YDL199C";
IV	ensembl	start_codon	103351	103353	.	-	0	gene_id "YDL199C"; transcript_id "YDL199C"; exon_number "1"; gene_source "ensembl"; gene_biotype "protein_coding"; transcript_name "YDL199C"; transcript_source "ensembl"; transcript_biotype "protein_coding";
IV	ensembl	stop_codon	101290	101292	.	-	0	gene_id "YDL199C"; transcript_id "YDL199C"; exon_number "1"; gene_source "ensembl"; gene_biotype "protein_coding"; transcript_name "YDL199C"; transcript_source "ensembl"; transcript_biotype "protein_coding";
IV	ensembl	gene	103649	104551	.	-	.	gene_id "YDL198C"; gene_name "GGC1"; gene_source "ensembl"; gene_biotype "protein_coding";
IV	ensembl	transcript	103649	104551	.	-	.	gene_id "YDL198C"; transcript_id "YDL198C"; gene_name "GGC1"; gene_source "ensembl"; gene_biotype "protein_coding"; transcript_name "GGC1"; transcript_source "ensembl"; transcript_biotype "protein_coding";
IV	ensembl	exon	103649	104551	.	-	.	gene_id "YDL198C"; transcript_id "YDL198C"; exon_number "1"; gene_name "GGC1"; gene_source "ensembl"; gene_biotype "protein_coding"; transcript_name "GGC1"; transcript_source "ensembl"; transcript_biotype "protein_coding"; exon_id "YDL198C.1";
IV	ensembl	CDS	103652	104551	.	-	0	gene_id "YDL198C"; transcript_id "YDL198C"; exon_number "1"; gene_name "GGC1"; gene_source "ensembl"; gene_biotype "protein_coding"; transcript_name "GGC1"; transcript_source "ensembl"; transcript_biotype "protein_coding"; protein_id "YDL198C";
IV	ensembl	start_codon	104549	104551	.	-	0	gene_id "YDL198C"; transcript_id "YDL198C"; exon_number "1"; gene_name "GGC1"; gene_source "ensembl"; gene_biotype "protein_coding"; transcript_name "GGC1"; transcript_source "ensembl"; transcript_biotype "protein_coding";
IV	ensembl	stop_codon	103649	103651	.	-	0	gene_id "YDL198C"; transcript_id "YDL198C"; exon_number "1"; gene_name "GGC1"; gene_source "ensembl"; gene_biotype "protein_coding"; transcript_name "GGC1"; transcript_source "ensembl"; transcript_biotype "protein_coding";
IV	ensembl	gene	104917	106494	.	-	.	gene_id "YDL197C"; gene_name "ASF2"; gene_source "ensembl"; gene_biotype "protein_coding";
IV	ensembl	transcript	104917	106494	.	-	.	gene_id "YDL197C"; transcript_id "YDL197C"; gene_name "ASF2"; gene_source "ensembl"; gene_biotype "protein_coding"; transcript_name "ASF2"; transcript_source "ensembl"; transcript_biotype "protein_coding";
IV	ensembl	exon	104917	106494	.	-	.	gene_id "YDL197C"; transcript_id "YDL197C"; exon_number "1"; gene_name "ASF2"; gene_source "ensembl"; gene_biotype "protein_coding"; transcript_name "ASF2"; transcript_source "ensembl"; transcript_biotype "protein_coding"; exon_id "YDL197C.1";
IV	ensembl	CDS	104920	106494	.	-	0	gene_id "YDL197C"; transcript_id "YDL197C"; exon_number "1"; gene_name "ASF2"; gene_source "ensembl"; gene_biotype "protein_coding"; transcript_name "ASF2"; transcript_source "ensembl"; transcript_biotype "protein_coding"; protein_id "YDL197C";
IV	ensembl	start_codon	106492	106494	.	-	0	gene_id "YDL197C"; transcript_id "YDL197C"; exon_number "1"; gene_name "ASF2"; gene_source "ensembl"; gene_biotype "protein_coding"; transcript_name "ASF2"; transcript_source "ensembl"; transcript_biotype "protein_coding";
IV	ensembl	stop_codon	104917	104919	.	-	0	gene_id "YDL197C"; transcript_id "YDL197C"; exon_number "1"; gene_name "ASF2"; gene_source "ensembl"; gene_biotype "protein_coding"; transcript_name "ASF2"; transcript_source "ensembl"; transcript_biotype "protein_coding";
IV	ensembl	gene	106741	107070	.	+	.	gene_id "YDL196W"; gene_source "ensembl"; gene_biotype "protein_coding";
IV	ensembl	transcript	106741	107070	.	+	.	gene_id "YDL196W"; transcript_id "YDL196W"; gene_source "ensembl"; gene_biotype "protein_coding"; transcript_name "YDL196W"; transcript_source "ensembl"; transcript_biotype "protein_coding";
IV	ensembl	exon	106741	107070	.	+	.	gene_id "YDL196W"; transcript_id "YDL196W"; exon_number "1"; gene_source "ensembl"; gene_biotype "protein_coding"; transcript_name "YDL196W"; transcript_source "ensembl"; transcript_biotype "protein_coding"; exon_id "YDL196W.1";
IV	ensembl	CDS	106741	107067	.	+	0	gene_id "YDL196W"; transcript_id "YDL196W"; exon_number "1"; gene_source "ensembl"; gene_biotype "protein_coding"; transcript_name "YDL196W"; transcript_source "ensembl"; transcript_biotype "protein_coding"; protein_id "YDL196W";
IV	ensembl	start_codon	106741	106743	.	+	0	gene_id "YDL196W"; transcript_id "YDL196W"; exon_number "1"; gene_source "ensembl"; gene_biotype "protein_coding"; transcript_name "YDL196W"; transcript_source "ensembl"; transcript_biotype "protein_coding";
IV	ensembl	stop_codon	107068	107070	.	+	0	gene_id "YDL196W"; transcript_id "YDL196W"; exon_number "1"; gene_source "ensembl"; gene_biotype "protein_coding"; transcript_name "YDL196W"; transcript_source "ensembl"; transcript_biotype "protein_coding";
IV	ensembl	gene	107208	111029	.	+	.	gene_id "YDL195W"; gene_name "SEC31"; gene_source "ensembl"; gene_biotype "protein_coding";
IV	ensembl	transcript	107208	111029	.	+	.	gene_id "YDL195W"; transcript_id "YDL195W"; gene_name "SEC31"; gene_source "ensembl"; gene_biotype "protein_coding"; transcript_name "SEC31"; transcript_source "ensembl"; transcript_biotype "protein_coding";
IV	ensembl	exon	107208	111029	.	+	.	gene_id "YDL195W"; transcript_id "YDL195W"; exon_number "1"; gene_name "SEC31"; gene_source "ensembl"; gene_biotype "protein_coding"; transcript_name "SEC31"; transcript_source "ensembl"; transcript_biotype "protein_coding"; exon_id "YDL195W.1";
IV	ensembl	CDS	107208	111026	.	+	0	gene_id "YDL195W"; transcript_id "YDL195W"; exon_number "1"; gene_name "SEC31"; gene_source "ensembl"; gene_biotype "protein_coding"; transcript_name "SEC31"; transcript_source "ensembl"; transcript_biotype "protein_coding"; protein_id "YDL195W";
IV	ensembl	start_codon	107208	107210	.	+	0	gene_id "YDL195W"; transcript_id "YDL195W"; exon_number "1"; gene_name "SEC31"; gene_source "ensembl"; gene_biotype "protein_coding"; transcript_name "SEC31"; transcript_source "ensembl"; transcript_biotype "protein_coding";
IV	ensembl	stop_codon	111027	111029	.	+	0	gene_id "YDL195W"; transcript_id "YDL195W"; exon_number "1"; gene_name "SEC31"; gene_source "ensembl"; gene_biotype "protein_coding"; transcript_name "SEC31"; transcript_source "ensembl"; transcript_biotype "protein_coding";
IV	ensembl	gene	111580	114234	.	+	.	gene_id "YDL194W"; gene_name "SNF3"; gene_source "ensembl"; gene_biotype "protein_coding";
IV	ensembl	transcript	111580	114234	.	+	.	gene_id "YDL194W"; transcript_id "YDL194W"; gene_name "SNF3"; gene_source "ensembl"; gene_biotype "protein_coding"; transcript_name "SNF3"; transcript_source "ensembl"; transcript_biotype "protein_coding";
IV	ensembl	exon	111580	114234	.	+	.	gene_id "YDL194W"; transcript_id "YDL194W"; exon_number "1"; gene_name "SNF3"; gene_source "ensembl"; gene_biotype "protein_coding"; transcript_name "SNF3"; transcript_source "ensembl"; transcript_biotype "protein_coding"; exon_id "YDL194W.1";
IV	ensembl	CDS	111580	114231	.	+	0	gene_id "YDL194W"; transcript_id "YDL194W"; exon_number "1"; gene_name "SNF3"; gene_source "ensembl"; gene_biotype "protein_coding"; transcript_name "SNF3"; transcript_source "ensembl"; transcript_biotype "protein_coding"; protein_id "YDL194W";
IV	ensembl	start_codon	111580	111582	.	+	0	gene_id "YDL194W"; transcript_id "YDL194W"; exon_number "1"; gene_name "SNF3"; gene_source "ensembl"; gene_biotype "protein_coding"; transcript_name "SNF3"; transcript_source "ensembl"; transcript_biotype "protein_coding";
IV	ensembl	stop_codon	114232	114234	.	+	0	gene_id "YDL194W"; transcript_id "YDL194W"; exon_number "1"; gene_name "SNF3"; gene_source "ensembl"; gene_biotype "protein_coding"; transcript_name "SNF3"; transcript_source "ensembl"; transcript_biotype "protein_coding";
IV	ensembl	gene	114672	115799	.	+	.	gene_id "YDL193W"; gene_name "NUS1"; gene_source "ensembl"; gene_biotype "protein_coding";
IV	ensembl	transcript	114672	115799	.	+	.	gene_id "YDL193W"; transcript_id "YDL193W"; gene_name "NUS1"; gene_source "ensembl"; gene_biotype "protein_coding"; transcript_name "NUS1"; transcript_source "ensembl"; transcript_biotype "protein_coding";
IV	ensembl	exon	114672	115799	.	+	.	gene_id "YDL193W"; transcript_id "YDL193W"; exon_number "1"; gene_name "NUS1"; gene_source "ensembl"; gene_biotype "protein_coding"; transcript_name "NUS1"; transcript_source "ensembl"; transcript_biotype "protein_coding"; exon_id "YDL193W.1";
IV	ensembl	CDS	114672	115796	.	+	0	gene_id "YDL193W"; transcript_id "YDL193W"; exon_number "1"; gene_name "NUS1"; gene_source "ensembl"; gene_biotype "protein_coding"; transcript_name "NUS1"; transcript_source "ensembl"; transcript_biotype "protein_coding"; protein_id "YDL193W";
IV	ensembl	start_codon	114672	114674	.	+	0	gene_id "YDL193W"; transcript_id "YDL193W"; exon_number "1"; gene_name "NUS1"; gene_source "ensembl"; gene_biotype "protein_coding"; transcript_name "NUS1"; transcript_source "ensembl"; transcript_biotype "protein_coding";
IV	ensembl	stop_codon	115797	115799	.	+	0	gene_id "YDL193W"; transcript_id "YDL193W"; exon_number "1"; gene_name "NUS1"; gene_source "ensembl"; gene_biotype "protein_coding"; transcript_name "NUS1"; transcript_source "ensembl"; transcript_biotype "protein_coding";
IV	ensembl	gene	116321	116866	.	+	.	gene_id "YDL192W"; gene_name "ARF1"; gene_source "ensembl"; gene_biotype "protein_coding";
IV	ensembl	transcript	116321	116866	.	+	.	gene_id "YDL192W"; transcript_id "YDL192W"; gene_name "ARF1"; gene_source "ensembl"; gene_biotype "protein_coding"; transcript_name "ARF1"; transcript_source "ensembl"; transcript_biotype "protein_coding";
IV	ensembl	exon	116321	116866	.	+	.	gene_id "YDL192W"; transcript_id "YDL192W"; exon_number "1"; gene_name "ARF1"; gene_source "ensembl"; gene_biotype "protein_coding"; transcript_name "ARF1"; transcript_source "ensembl"; transcript_biotype "protein_coding"; exon_id "YDL192W.1";
IV	ensembl	CDS	116321	116863	.	+	0	gene_id "YDL192W"; transcript_id "YDL192W"; exon_number "1"; gene_name "ARF1"; gene_source "ensembl"; gene_biotype "protein_coding"; transcript_name "ARF1"; transcript_source "ensembl"; transcript_biotype "protein_coding"; protein_id "YDL192W";
IV	ensembl	start_codon	116321	116323	.	+	0	gene_id "YDL192W"; transcript_id "YDL192W"; exon_number "1"; gene_name "ARF1"; gene_source "ensembl"; gene_biotype "protein_coding"; transcript_name "ARF1"; transcript_source "ensembl"; transcript_biotype "protein_coding";
IV	ensembl	stop_codon	116864	116866	.	+	0	gene_id "YDL192W"; transcript_id "YDL192W"; exon_number "1"; gene_name "ARF1"; gene_source "ensembl"; gene_biotype "protein_coding"; transcript_name "ARF1"; transcript_source "ensembl"; transcript_biotype "protein_coding";
IV	ensembl	gene	117664	118517	.	+	.	gene_id "YDL191W"; gene_name "RPL35A"; gene_source "ensembl"; gene_biotype "protein_coding";
IV	ensembl	transcript	117664	118517	.	+	.	gene_id "YDL191W"; transcript_id "YDL191W"; gene_name "RPL35A"; gene_source "ensembl"; gene_biotype "protein_coding"; transcript_name "RPL35A"; transcript_source "ensembl"; transcript_biotype "protein_coding";
IV	ensembl	exon	117664	117666	.	+	.	gene_id "YDL191W"; transcript_id "YDL191W"; exon_number "1"; gene_name "RPL35A"; gene_source "ensembl"; gene_biotype "protein_coding"; transcript_name "RPL35A"; transcript_source "ensembl"; transcript_biotype "protein_coding"; exon_id "YDL191W.1";
IV	ensembl	CDS	117664	117666	.	+	0	gene_id "YDL191W"; transcript_id "YDL191W"; exon_number "1"; gene_name "RPL35A"; gene_source "ensembl"; gene_biotype "protein_coding"; transcript_name "RPL35A"; transcript_source "ensembl"; transcript_biotype "protein_coding"; protein_id "YDL191W";
IV	ensembl	start_codon	117664	117666	.	+	0	gene_id "YDL191W"; transcript_id "YDL191W"; exon_number "1"; gene_name "RPL35A"; gene_source "ensembl"; gene_biotype "protein_coding"; transcript_name "RPL35A"; transcript_source "ensembl"; transcript_biotype "protein_coding";
IV	ensembl	exon	118158	118517	.	+	.	gene_id "YDL191W"; transcript_id "YDL191W"; exon_number "2"; gene_name "RPL35A"; gene_source "ensembl"; gene_biotype "protein_coding"; transcript_name "RPL35A"; transcript_source "ensembl"; transcript_biotype "protein_coding"; exon_id "YDL191W.2";
IV	ensembl	CDS	118158	118514	.	+	0	gene_id "YDL191W"; transcript_id "YDL191W"; exon_number "2"; gene_name "RPL35A"; gene_source "ensembl"; gene_biotype "protein_coding"; transcript_name "RPL35A"; transcript_source "ensembl"; transcript_biotype "protein_coding"; protein_id "YDL191W";
IV	ensembl	stop_codon	118515	118517	.	+	0	gene_id "YDL191W"; transcript_id "YDL191W"; exon_number "2"; gene_name "RPL35A"; gene_source "ensembl"; gene_biotype "protein_coding"; transcript_name "RPL35A"; transcript_source "ensembl"; transcript_biotype "protein_coding";
IV	ensembl	gene	118707	121592	.	-	.	gene_id "YDL190C"; gene_name "UFD2"; gene_source "ensembl"; gene_biotype "protein_coding";
IV	ensembl	transcript	118707	121592	.	-	.	gene_id "YDL190C"; transcript_id "YDL190C"; gene_name "UFD2"; gene_source "ensembl"; gene_biotype "protein_coding"; transcript_name "UFD2"; transcript_source "ensembl"; transcript_biotype "protein_coding";
IV	ensembl	exon	118707	121592	.	-	.	gene_id "YDL190C"; transcript_id "YDL190C"; exon_number "1"; gene_name "UFD2"; gene_source "ensembl"; gene_biotype "protein_coding"; transcript_name "UFD2"; transcript_source "ensembl"; transcript_biotype "protein_coding"; exon_id "YDL190C.1";
IV	ensembl	CDS	118710	121592	.	-	0	gene_id "YDL190C"; transcript_id "YDL190C"; exon_number "1"; gene_name "UFD2"; gene_source "ensembl"; gene_biotype "protein_coding"; transcript_name "UFD2"; transcript_source "ensembl"; transcript_biotype "protein_coding"; protein_id "YDL190C";
IV	ensembl	start_codon	121590	121592	.	-	0	gene_id "YDL190C"; transcript_id "YDL190C"; exon_number "1"; gene_name "UFD2"; gene_source "ensembl"; gene_biotype "protein_coding"; transcript_name "UFD2"; transcript_source "ensembl"; transcript_biotype "protein_coding";
IV	ensembl	stop_codon	118707	118709	.	-	0	gene_id "YDL190C"; transcript_id "YDL190C"; exon_number "1"; gene_name "UFD2"; gene_source "ensembl"; gene_biotype "protein_coding"; transcript_name "UFD2"; transcript_source "ensembl"; transcript_biotype "protein_coding";
IV	ensembl	gene	122216	123589	.	+	.	gene_id "YDL189W"; gene_name "RBS1"; gene_source "ensembl"; gene_biotype "protein_coding";
IV	ensembl	transcript	122216	123589	.	+	.	gene_id "YDL189W"; transcript_id "YDL189W"; gene_name "RBS1"; gene_source "ensembl"; gene_biotype "protein_coding"; transcript_name "RBS1"; transcript_source "ensembl"; transcript_biotype "protein_coding";
IV	ensembl	exon	122216	123589	.	+	.	gene_id "YDL189W"; transcript_id "YDL189W"; exon_number "1"; gene_name "RBS1"; gene_source "ensembl"; gene_biotype "protein_coding"; transcript_name "RBS1"; transcript_source "ensembl"; transcript_biotype "protein_coding"; exon_id "YDL189W.1";
IV	ensembl	CDS	122216	123586	.	+	0	gene_id "YDL189W"; transcript_id "YDL189W"; exon_number "1"; gene_name "RBS1"; gene_source "ensembl"; gene_biotype "protein_coding"; transcript_name "RBS1"; transcript_source "ensembl"; transcript_biotype "protein_coding"; protein_id "YDL189W";
IV	ensembl	start_codon	122216	122218	.	+	0	gene_id "YDL189W"; transcript_id "YDL189W"; exon_number "1"; gene_name "RBS1"; gene_source "ensembl"; gene_biotype "protein_coding"; transcript_name "RBS1"; transcript_source "ensembl"; transcript_biotype "protein_coding";
IV	ensembl	stop_codon	123587	123589	.	+	0	gene_id "YDL189W"; transcript_id "YDL189W"; exon_number "1"; gene_name "RBS1"; gene_source "ensembl"; gene_biotype "protein_coding"; transcript_name "RBS1"; transcript_source "ensembl"; transcript_biotype "protein_coding";
IV	ensembl	gene	123865	124998	.	-	.	gene_id "YDL188C"; gene_name "PPH22"; gene_source "ensembl"; gene_biotype "protein_coding";
IV	ensembl	transcript	123865	124998	.	-	.	gene_id "YDL188C"; transcript_id "YDL188C"; gene_name "PPH22"; gene_source "ensembl"; gene_biotype "protein_coding"; transcript_name "PPH22"; transcript_source "ensembl"; transcript_biotype "protein_coding";
IV	ensembl	exon	123865	124998	.	-	.	gene_id "YDL188C"; transcript_id "YDL188C"; exon_number "1"; gene_name "PPH22"; gene_source "ensembl"; gene_biotype "protein_coding"; transcript_name "PPH22"; transcript_source "ensembl"; transcript_biotype "protein_coding"; exon_id "YDL188C.1";
IV	ensembl	CDS	123868	124998	.	-	0	gene_id "YDL188C"; transcript_id "YDL188C"; exon_number "1"; gene_name "PPH22"; gene_source "ensembl"; gene_biotype "protein_coding"; transcript_name "PPH22"; transcript_source "ensembl"; transcript_biotype "protein_coding"; protein_id "YDL188C";
IV	ensembl	start_codon	124996	124998	.	-	0	gene_id "YDL188C"; transcript_id "YDL188C"; exon_number "1"; gene_name "PPH22"; gene_source "ensembl"; gene_biotype "protein_coding"; transcript_name "PPH22"; transcript_source "ensembl"; transcript_biotype "protein_coding";
IV	ensembl	stop_codon	123865	123867	.	-	0	gene_id "YDL188C"; transcript_id "YDL188C"; exon_number "1"; gene_name "PPH22"; gene_source "ensembl"; gene_biotype "protein_coding"; transcript_name "PPH22"; transcript_source "ensembl"; transcript_biotype "protein_coding";
IV	ensembl	gene	125509	125838	.	-	.	gene_id "YDL187C"; gene_source "ensembl"; gene_biotype "protein_coding";
IV	ensembl	transcript	125509	125838	.	-	.	gene_id "YDL187C"; transcript_id "YDL187C"; gene_source "ensembl"; gene_biotype "protein_coding"; transcript_name "YDL187C"; transcript_source "ensembl"; transcript_biotype "protein_coding";
IV	ensembl	exon	125509	125838	.	-	.	gene_id "YDL187C"; transcript_id "YDL187C"; exon_number "1"; gene_source "ensembl"; gene_biotype "protein_coding"; transcript_name "YDL187C"; transcript_source "ensembl"; transcript_biotype "protein_coding"; exon_id "YDL187C.1";
IV	ensembl	CDS	125512	125838	.	-	0	gene_id "YDL187C"; transcript_id "YDL187C"; exon_number "1"; gene_source "ensembl"; gene_biotype "protein_coding"; transcript_name "YDL187C"; transcript_source "ensembl"; transcript_biotype "protein_coding"; protein_id "YDL187C";
IV	ensembl	start_codon	125836	125838	.	-	0	gene_id "YDL187C"; transcript_id "YDL187C"; exon_number "1"; gene_source "ensembl"; gene_biotype "protein_coding"; transcript_name "YDL187C"; transcript_source "ensembl"; transcript_biotype "protein_coding";
IV	ensembl	stop_codon	125509	125511	.	-	0	gene_id "YDL187C"; transcript_id "YDL187C"; exon_number "1"; gene_source "ensembl"; gene_biotype "protein_coding"; transcript_name "YDL187C"; transcript_source "ensembl"; transcript_biotype "protein_coding";
IV	ensembl	gene	125616	126449	.	+	.	gene_id "YDL186W"; gene_source "ensembl"; gene_biotype "protein_coding";
IV	ensembl	transcript	125616	126449	.	+	.	gene_id "YDL186W"; transcript_id "YDL186W"; gene_source "ensembl"; gene_biotype "protein_coding"; transcript_name "YDL186W"; transcript_source "ensembl"; transcript_biotype "protein_coding";
IV	ensembl	exon	125616	126449	.	+	.	gene_id "YDL186W"; transcript_id "YDL186W"; exon_number "1"; gene_source "ensembl"; gene_biotype "protein_coding"; transcript_name "YDL186W"; transcript_source "ensembl"; transcript_biotype "protein_coding"; exon_id "YDL186W.1";
IV	ensembl	CDS	125616	126446	.	+	0	gene_id "YDL186W"; transcript_id "YDL186W"; exon_number "1"; gene_source "ensembl"; gene_biotype "protein_coding"; transcript_name "YDL186W"; transcript_source "ensembl"; transcript_biotype "protein_coding"; protein_id "YDL186W";
IV	ensembl	start_codon	125616	125618	.	+	0	gene_id "YDL186W"; transcript_id "YDL186W"; exon_number "1"; gene_source "ensembl"; gene_biotype "protein_coding"; transcript_name "YDL186W"; transcript_source "ensembl"; transcript_biotype "protein_coding";
IV	ensembl	stop_codon	126447	126449	.	+	0	gene_id "YDL186W"; transcript_id "YDL186W"; exon_number "1"; gene_source "ensembl"; gene_biotype "protein_coding"; transcript_name "YDL186W"; transcript_source "ensembl"; transcript_biotype "protein_coding";
IV	ensembl	gene	126608	126835	.	-	.	gene_id "YDL185C-A"; gene_source "ensembl"; gene_biotype "protein_coding";
IV	ensembl	transcript	126608	126835	.	-	.	gene_id "YDL185C-A"; transcript_id "YDL185C-A"; gene_source "ensembl"; gene_biotype "protein_coding"; transcript_name "YDL185C-A"; transcript_source "ensembl"; transcript_biotype "protein_coding";
IV	ensembl	exon	126608	126835	.	-	.	gene_id "YDL185C-A"; transcript_id "YDL185C-A"; exon_number "1"; gene_source "ensembl"; gene_biotype "protein_coding"; transcript_name "YDL185C-A"; transcript_source "ensembl"; transcript_biotype "protein_coding"; exon_id "YDL185C-A.1";
IV	ensembl	CDS	126611	126835	.	-	0	gene_id "YDL185C-A"; transcript_id "YDL185C-A"; exon_number "1"; gene_source "ensembl"; gene_biotype "protein_coding"; transcript_name "YDL185C-A"; transcript_source "ensembl"; transcript_biotype "protein_coding"; protein_id "YDL185C-A";
IV	ensembl	start_codon	126833	126835	.	-	0	gene_id "YDL185C-A"; transcript_id "YDL185C-A"; exon_number "1"; gene_source "ensembl"; gene_biotype "protein_coding"; transcript_name "YDL185C-A"; transcript_source "ensembl"; transcript_biotype "protein_coding";
IV	ensembl	stop_codon	126608	126610	.	-	0	gene_id "YDL185C-A"; transcript_id "YDL185C-A"; exon_number "1"; gene_source "ensembl"; gene_biotype "protein_coding"; transcript_name "YDL185C-A"; transcript_source "ensembl"; transcript_biotype "protein_coding";
IV	ensembl	gene	126787	130002	.	+	.	gene_id "YDL185W"; gene_name "VMA1"; gene_source "ensembl"; gene_biotype "protein_coding";
IV	ensembl	transcript	126787	130002	.	+	.	gene_id "YDL185W"; transcript_id "YDL185W"; gene_name "VMA1"; gene_source "ensembl"; gene_biotype "protein_coding"; transcript_name "VMA1"; transcript_source "ensembl"; transcript_biotype "protein_coding";
IV	ensembl	exon	126787	130002	.	+	.	gene_id "YDL185W"; transcript_id "YDL185W"; exon_number "1"; gene_name "VMA1"; gene_source "ensembl"; gene_biotype "protein_coding"; transcript_name "VMA1"; transcript_source "ensembl"; transcript_biotype "protein_coding"; exon_id "YDL185W.1";
IV	ensembl	CDS	126787	129999	.	+	0	gene_id "YDL185W"; transcript_id "YDL185W"; exon_number "1"; gene_name "VMA1"; gene_source "ensembl"; gene_biotype "protein_coding"; transcript_name "VMA1"; transcript_source "ensembl"; transcript_biotype "protein_coding"; protein_id "YDL185W";
IV	ensembl	start_codon	126787	126789	.	+	0	gene_id "YDL185W"; transcript_id "YDL185W"; exon_number "1"; gene_name "VMA1"; gene_source "ensembl"; gene_biotype "protein_coding"; transcript_name "VMA1"; transcript_source "ensembl"; transcript_biotype "protein_coding";
IV	ensembl	stop_codon	130000	130002	.	+	0	gene_id "YDL185W"; transcript_id "YDL185W"; exon_number "1"; gene_name "VMA1"; gene_source "ensembl"; gene_biotype "protein_coding"; transcript_name "VMA1"; transcript_source "ensembl"; transcript_biotype "protein_coding";
IV	ensembl	gene	130407	130484	.	-	.	gene_id "YDL184C"; gene_name "RPL41A"; gene_source "ensembl"; gene_biotype "protein_coding";
IV	ensembl	transcript	130407	130484	.	-	.	gene_id "YDL184C"; transcript_id "YDL184C"; gene_name "RPL41A"; gene_source "ensembl"; gene_biotype "protein_coding"; transcript_name "RPL41A"; transcript_source "ensembl"; transcript_biotype "protein_coding";
IV	ensembl	exon	130407	130484	.	-	.	gene_id "YDL184C"; transcript_id "YDL184C"; exon_number "1"; gene_name "RPL41A"; gene_source "ensembl"; gene_biotype "protein_coding"; transcript_name "RPL41A"; transcript_source "ensembl"; transcript_biotype "protein_coding"; exon_id "YDL184C.1";
IV	ensembl	CDS	130410	130484	.	-	0	gene_id "YDL184C"; transcript_id "YDL184C"; exon_number "1"; gene_name "RPL41A"; gene_source "ensembl"; gene_biotype "protein_coding"; transcript_name "RPL41A"; transcript_source "ensembl"; transcript_biotype "protein_coding"; protein_id "YDL184C";
IV	ensembl	start_codon	130482	130484	.	-	0	gene_id "YDL184C"; transcript_id "YDL184C"; exon_number "1"; gene_name "RPL41A"; gene_source "ensembl"; gene_biotype "protein_coding"; transcript_name "RPL41A"; transcript_source "ensembl"; transcript_biotype "protein_coding";
IV	ensembl	stop_codon	130407	130409	.	-	0	gene_id "YDL184C"; transcript_id "YDL184C"; exon_number "1"; gene_name "RPL41A"; gene_source "ensembl"; gene_biotype "protein_coding"; transcript_name "RPL41A"; transcript_source "ensembl"; transcript_biotype "protein_coding";
IV	ensembl	gene	130871	131833	.	-	.	gene_id "YDL183C"; gene_source "ensembl"; gene_biotype "protein_coding";
IV	ensembl	transcript	130871	131833	.	-	.	gene_id "YDL183C"; transcript_id "YDL183C"; gene_source "ensembl"; gene_biotype "protein_coding"; transcript_name "YDL183C"; transcript_source "ensembl"; transcript_biotype "protein_coding";
IV	ensembl	exon	130871	131833	.	-	.	gene_id "YDL183C"; transcript_id "YDL183C"; exon_number "1"; gene_source "ensembl"; gene_biotype "protein_coding"; transcript_name "YDL183C"; transcript_source "ensembl"; transcript_biotype "protein_coding"; exon_id "YDL183C.1";
IV	ensembl	CDS	130874	131833	.	-	0	gene_id "YDL183C"; transcript_id "YDL183C"; exon_number "1"; gene_source "ensembl"; gene_biotype "protein_coding"; transcript_name "YDL183C"; transcript_source "ensembl"; transcript_biotype "protein_coding"; protein_id "YDL183C";
IV	ensembl	start_codon	131831	131833	.	-	0	gene_id "YDL183C"; transcript_id "YDL183C"; exon_number "1"; gene_source "ensembl"; gene_biotype "protein_coding"; transcript_name "YDL183C"; transcript_source "ensembl"; transcript_biotype "protein_coding";
IV	ensembl	stop_codon	130871	130873	.	-	0	gene_id "YDL183C"; transcript_id "YDL183C"; exon_number "1"; gene_source "ensembl"; gene_biotype "protein_coding"; transcript_name "YDL183C"; transcript_source "ensembl"; transcript_biotype "protein_coding";
IV	ensembl	gene	133437	134723	.	+	.	gene_id "YDL182W"; gene_name "LYS20"; gene_source "ensembl"; gene_biotype "protein_coding";
IV	ensembl	transcript	133437	134723	.	+	.	gene_id "YDL182W"; transcript_id "YDL182W"; gene_name "LYS20"; gene_source "ensembl"; gene_biotype "protein_coding"; transcript_name "LYS20"; transcript_source "ensembl"; transcript_biotype "protein_coding";
IV	ensembl	exon	133437	134723	.	+	.	gene_id "YDL182W"; transcript_id "YDL182W"; exon_number "1"; gene_name "LYS20"; gene_source "ensembl"; gene_biotype "protein_coding"; transcript_name "LYS20"; transcript_source "ensembl"; transcript_biotype "protein_coding"; exon_id "YDL182W.1";
IV	ensembl	CDS	133437	134720	.	+	0	gene_id "YDL182W"; transcript_id "YDL182W"; exon_number "1"; gene_name "LYS20"; gene_source "ensembl"; gene_biotype "protein_coding"; transcript_name "LYS20"; transcript_source "ensembl"; transcript_biotype "protein_coding"; protein_id "YDL182W";
IV	ensembl	start_codon	133437	133439	.	+	0	gene_id "YDL182W"; transcript_id "YDL182W"; exon_number "1"; gene_name "LYS20"; gene_source "ensembl"; gene_biotype "protein_coding"; transcript_name "LYS20"; transcript_source "ensembl"; transcript_biotype "protein_coding";
IV	ensembl	stop_codon	134721	134723	.	+	0	gene_id "YDL182W"; transcript_id "YDL182W"; exon_number "1"; gene_name "LYS20"; gene_source "ensembl"; gene_biotype "protein_coding"; transcript_name "LYS20"; transcript_source "ensembl"; transcript_biotype "protein_coding";
IV	ensembl	gene	135179	135436	.	+	.	gene_id "YDL181W"; gene_name "INH1"; gene_source "ensembl"; gene_biotype "protein_coding";
IV	ensembl	transcript	135179	135436	.	+	.	gene_id "YDL181W"; transcript_id "YDL181W"; gene_name "INH1"; gene_source "ensembl"; gene_biotype "protein_coding"; transcript_name "INH1"; transcript_source "ensembl"; transcript_biotype "protein_coding";
IV	ensembl	exon	135179	135436	.	+	.	gene_id "YDL181W"; transcript_id "YDL181W"; exon_number "1"; gene_name "INH1"; gene_source "ensembl"; gene_biotype "protein_coding"; transcript_name "INH1"; transcript_source "ensembl"; transcript_biotype "protein_coding"; exon_id "YDL181W.1";
IV	ensembl	CDS	135179	135433	.	+	0	gene_id "YDL181W"; transcript_id "YDL181W"; exon_number "1"; gene_name "INH1"; gene_source "ensembl"; gene_biotype "protein_coding"; transcript_name "INH1"; transcript_source "ensembl"; transcript_biotype "protein_coding"; protein_id "YDL181W";
IV	ensembl	start_codon	135179	135181	.	+	0	gene_id "YDL181W"; transcript_id "YDL181W"; exon_number "1"; gene_name "INH1"; gene_source "ensembl"; gene_biotype "protein_coding"; transcript_name "INH1"; transcript_source "ensembl"; transcript_biotype "protein_coding";
IV	ensembl	stop_codon	135434	135436	.	+	0	gene_id "YDL181W"; transcript_id "YDL181W"; exon_number "1"; gene_name "INH1"; gene_source "ensembl"; gene_biotype "protein_coding"; transcript_name "INH1"; transcript_source "ensembl"; transcript_biotype "protein_coding";
IV	ensembl	gene	135896	137539	.	+	.	gene_id "YDL180W"; gene_source "ensembl"; gene_biotype "protein_coding";
IV	ensembl	transcript	135896	137539	.	+	.	gene_id "YDL180W"; transcript_id "YDL180W"; gene_source "ensembl"; gene_biotype "protein_coding"; transcript_name "YDL180W"; transcript_source "ensembl"; transcript_biotype "protein_coding";
IV	ensembl	exon	135896	137539	.	+	.	gene_id "YDL180W"; transcript_id "YDL180W"; exon_number "1"; gene_source "ensembl"; gene_biotype "protein_coding"; transcript_name "YDL180W"; transcript_source "ensembl"; transcript_biotype "protein_coding"; exon_id "YDL180W.1";
IV	ensembl	CDS	135896	137536	.	+	0	gene_id "YDL180W"; transcript_id "YDL180W"; exon_number "1"; gene_source "ensembl"; gene_biotype "protein_coding"; transcript_name "YDL180W"; transcript_source "ensembl"; transcript_biotype "protein_coding"; protein_id "YDL180W";
IV	ensembl	start_codon	135896	135898	.	+	0	gene_id "YDL180W"; transcript_id "YDL180W"; exon_number "1"; gene_source "ensembl"; gene_biotype "protein_coding"; transcript_name "YDL180W"; transcript_source "ensembl"; transcript_biotype "protein_coding";
IV	ensembl	stop_codon	137537	137539	.	+	0	gene_id "YDL180W"; transcript_id "YDL180W"; exon_number "1"; gene_source "ensembl"; gene_biotype "protein_coding"; transcript_name "YDL180W"; transcript_source "ensembl"; transcript_biotype "protein_coding";
IV	ensembl	gene	138291	139205	.	+	.	gene_id "YDL179W"; gene_name "PCL9"; gene_source "ensembl"; gene_biotype "protein_coding";
IV	ensembl	transcript	138291	139205	.	+	.	gene_id "YDL179W"; transcript_id "YDL179W"; gene_name "PCL9"; gene_source "ensembl"; gene_biotype "protein_coding"; transcript_name "PCL9"; transcript_source "ensembl"; transcript_biotype "protein_coding";
IV	ensembl	exon	138291	139205	.	+	.	gene_id "YDL179W"; transcript_id "YDL179W"; exon_number "1"; gene_name "PCL9"; gene_source "ensembl"; gene_biotype "protein_coding"; transcript_name "PCL9"; transcript_source "ensembl"; transcript_biotype "protein_coding"; exon_id "YDL179W.1";
IV	ensembl	CDS	138291	139202	.	+	0	gene_id "YDL179W"; transcript_id "YDL179W"; exon_number "1"; gene_name "PCL9"; gene_source "ensembl"; gene_biotype "protein_coding"; transcript_name "PCL9"; transcript_source "ensembl"; transcript_biotype "protein_coding"; protein_id "YDL179W";
IV	ensembl	start_codon	138291	138293	.	+	0	gene_id "YDL179W"; transcript_id "YDL179W"; exon_number "1"; gene_name "PCL9"; gene_source "ensembl"; gene_biotype "protein_coding"; transcript_name "PCL9"; transcript_source "ensembl"; transcript_biotype "protein_coding";
IV	ensembl	stop_codon	139203	139205	.	+	0	gene_id "YDL179W"; transcript_id "YDL179W"; exon_number "1"; gene_name "PCL9"; gene_source "ensembl"; gene_biotype "protein_coding"; transcript_name "PCL9"; transcript_source "ensembl"; transcript_biotype "protein_coding";
IV	ensembl	gene	139522	141114	.	+	.	gene_id "YDL178W"; gene_name "DLD2"; gene_source "ensembl"; gene_biotype "protein_coding";
IV	ensembl	transcript	139522	141114	.	+	.	gene_id "YDL178W"; transcript_id "YDL178W"; gene_name "DLD2"; gene_source "ensembl"; gene_biotype "protein_coding"; transcript_name "DLD2"; transcript_source "ensembl"; transcript_biotype "protein_coding";
IV	ensembl	exon	139522	141114	.	+	.	gene_id "YDL178W"; transcript_id "YDL178W"; exon_number "1"; gene_name "DLD2"; gene_source "ensembl"; gene_biotype "protein_coding"; transcript_name "DLD2"; transcript_source "ensembl"; transcript_biotype "protein_coding"; exon_id "YDL178W.1";
IV	ensembl	CDS	139522	141111	.	+	0	gene_id "YDL178W"; transcript_id "YDL178W"; exon_number "1"; gene_name "DLD2"; gene_source "ensembl"; gene_biotype "protein_coding"; transcript_name "DLD2"; transcript_source "ensembl"; transcript_biotype "protein_coding"; protein_id "YDL178W";
IV	ensembl	start_codon	139522	139524	.	+	0	gene_id "YDL178W"; transcript_id "YDL178W"; exon_number "1"; gene_name "DLD2"; gene_source "ensembl"; gene_biotype "protein_coding"; transcript_name "DLD2"; transcript_source "ensembl"; transcript_biotype "protein_coding";
IV	ensembl	stop_codon	141112	141114	.	+	0	gene_id "YDL178W"; transcript_id "YDL178W"; exon_number "1"; gene_name "DLD2"; gene_source "ensembl"; gene_biotype "protein_coding"; transcript_name "DLD2"; transcript_source "ensembl"; transcript_biotype "protein_coding";
IV	ensembl	gene	141209	141721	.	-	.	gene_id "YDL177C"; gene_source "ensembl"; gene_biotype "protein_coding";
IV	ensembl	transcript	141209	141721	.	-	.	gene_id "YDL177C"; transcript_id "YDL177C"; gene_source "ensembl"; gene_biotype "protein_coding"; transcript_name "YDL177C"; transcript_source "ensembl"; transcript_biotype "protein_coding";
IV	ensembl	exon	141209	141721	.	-	.	gene_id "YDL177C"; transcript_id "YDL177C"; exon_number "1"; gene_source "ensembl"; gene_biotype "protein_coding"; transcript_name "YDL177C"; transcript_source "ensembl"; transcript_biotype "protein_coding"; exon_id "YDL177C.1";
IV	ensembl	CDS	141212	141721	.	-	0	gene_id "YDL177C"; transcript_id "YDL177C"; exon_number "1"; gene_source "ensembl"; gene_biotype "protein_coding"; transcript_name "YDL177C"; transcript_source "ensembl"; transcript_biotype "protein_coding"; protein_id "YDL177C";
IV	ensembl	start_codon	141719	141721	.	-	0	gene_id "YDL177C"; transcript_id "YDL177C"; exon_number "1"; gene_source "ensembl"; gene_biotype "protein_coding"; transcript_name "YDL177C"; transcript_source "ensembl"; transcript_biotype "protein_coding";
IV	ensembl	stop_codon	141209	141211	.	-	0	gene_id "YDL177C"; transcript_id "YDL177C"; exon_number "1"; gene_source "ensembl"; gene_biotype "protein_coding"; transcript_name "YDL177C"; transcript_source "ensembl"; transcript_biotype "protein_coding";
IV	ensembl	gene	142097	144223	.	+	.	gene_id "YDL176W"; gene_source "ensembl"; gene_biotype "protein_coding";
IV	ensembl	transcript	142097	144223	.	+	.	gene_id "YDL176W"; transcript_id "YDL176W"; gene_source "ensembl"; gene_biotype "protein_coding"; transcript_name "YDL176W"; transcript_source "ensembl"; transcript_biotype "protein_coding";
IV	ensembl	exon	142097	144223	.	+	.	gene_id "YDL176W"; transcript_id "YDL176W"; exon_number "1"; gene_source "ensembl"; gene_biotype "protein_coding"; transcript_name "YDL176W"; transcript_source "ensembl"; transcript_biotype "protein_coding"; exon_id "YDL176W.1";
IV	ensembl	CDS	142097	144220	.	+	0	gene_id "YDL176W"; transcript_id "YDL176W"; exon_number "1"; gene_source "ensembl"; gene_biotype "protein_coding"; transcript_name "YDL176W"; transcript_source "ensembl"; transcript_biotype "protein_coding"; protein_id "YDL176W";
IV	ensembl	start_codon	142097	142099	.	+	0	gene_id "YDL176W"; transcript_id "YDL176W"; exon_number "1"; gene_source "ensembl"; gene_biotype "protein_coding"; transcript_name "YDL176W"; transcript_source "ensembl"; transcript_biotype "protein_coding";
IV	ensembl	stop_codon	144221	144223	.	+	0	gene_id "YDL176W"; transcript_id "YDL176W"; exon_number "1"; gene_source "ensembl"; gene_biotype "protein_coding"; transcript_name "YDL176W"; transcript_source "ensembl"; transcript_biotype "protein_coding";
IV	ensembl	gene	144484	145518	.	-	.	gene_id "YDL175C"; gene_name "AIR2"; gene_source "ensembl"; gene_biotype "protein_coding";
IV	ensembl	transcript	144484	145518	.	-	.	gene_id "YDL175C"; transcript_id "YDL175C"; gene_name "AIR2"; gene_source "ensembl"; gene_biotype "protein_coding"; transcript_name "AIR2"; transcript_source "ensembl"; transcript_biotype "protein_coding";
IV	ensembl	exon	144484	145518	.	-	.	gene_id "YDL175C"; transcript_id "YDL175C"; exon_number "1"; gene_name "AIR2"; gene_source "ensembl"; gene_biotype "protein_coding"; transcript_name "AIR2"; transcript_source "ensembl"; transcript_biotype "protein_coding"; exon_id "YDL175C.1";
IV	ensembl	CDS	144487	145518	.	-	0	gene_id "YDL175C"; transcript_id "YDL175C"; exon_number "1"; gene_name "AIR2"; gene_source "ensembl"; gene_biotype "protein_coding"; transcript_name "AIR2"; transcript_source "ensembl"; transcript_biotype "protein_coding"; protein_id "YDL175C";
IV	ensembl	start_codon	145516	145518	.	-	0	gene_id "YDL175C"; transcript_id "YDL175C"; exon_number "1"; gene_name "AIR2"; gene_source "ensembl"; gene_biotype "protein_coding"; transcript_name "AIR2"; transcript_source "ensembl"; transcript_biotype "protein_coding";
IV	ensembl	stop_codon	144484	144486	.	-	0	gene_id "YDL175C"; transcript_id "YDL175C"; exon_number "1"; gene_name "AIR2"; gene_source "ensembl"; gene_biotype "protein_coding"; transcript_name "AIR2"; transcript_source "ensembl"; transcript_biotype "protein_coding";
IV	ensembl	gene	145826	147589	.	-	.	gene_id "YDL174C"; gene_name "DLD1"; gene_source "ensembl"; gene_biotype "protein_coding";
IV	ensembl	transcript	145826	147589	.	-	.	gene_id "YDL174C"; transcript_id "YDL174C"; gene_name "DLD1"; gene_source "ensembl"; gene_biotype "protein_coding"; transcript_name "DLD1"; transcript_source "ensembl"; transcript_biotype "protein_coding";
IV	ensembl	exon	145826	147589	.	-	.	gene_id "YDL174C"; transcript_id "YDL174C"; exon_number "1"; gene_name "DLD1"; gene_source "ensembl"; gene_biotype "protein_coding"; transcript_name "DLD1"; transcript_source "ensembl"; transcript_biotype "protein_coding"; exon_id "YDL174C.1";
IV	ensembl	CDS	145829	147589	.	-	0	gene_id "YDL174C"; transcript_id "YDL174C"; exon_number "1"; gene_name "DLD1"; gene_source "ensembl"; gene_biotype "protein_coding"; transcript_name "DLD1"; transcript_source "ensembl"; transcript_biotype "protein_coding"; protein_id "YDL174C";
IV	ensembl	start_codon	147587	147589	.	-	0	gene_id "YDL174C"; transcript_id "YDL174C"; exon_number "1"; gene_name "DLD1"; gene_source "ensembl"; gene_biotype "protein_coding"; transcript_name "DLD1"; transcript_source "ensembl"; transcript_biotype "protein_coding";
IV	ensembl	stop_codon	145826	145828	.	-	0	gene_id "YDL174C"; transcript_id "YDL174C"; exon_number "1"; gene_name "DLD1"; gene_source "ensembl"; gene_biotype "protein_coding"; transcript_name "DLD1"; transcript_source "ensembl"; transcript_biotype "protein_coding";
IV	ensembl	gene	148191	149078	.	+	.	gene_id "YDL173W"; gene_name "PAR32"; gene_source "ensembl"; gene_biotype "protein_coding";
IV	ensembl	transcript	148191	149078	.	+	.	gene_id "YDL173W"; transcript_id "YDL173W"; gene_name "PAR32"; gene_source "ensembl"; gene_biotype "protein_coding"; transcript_name "PAR32"; transcript_source "ensembl"; transcript_biotype "protein_coding";
IV	ensembl	exon	148191	149078	.	+	.	gene_id "YDL173W"; transcript_id "YDL173W"; exon_number "1"; gene_name "PAR32"; gene_source "ensembl"; gene_biotype "protein_coding"; transcript_name "PAR32"; transcript_source "ensembl"; transcript_biotype "protein_coding"; exon_id "YDL173W.1";
IV	ensembl	CDS	148191	149075	.	+	0	gene_id "YDL173W"; transcript_id "YDL173W"; exon_number "1"; gene_name "PAR32"; gene_source "ensembl"; gene_biotype "protein_coding"; transcript_name "PAR32"; transcript_source "ensembl"; transcript_biotype "protein_coding"; protein_id "YDL173W";
IV	ensembl	start_codon	148191	148193	.	+	0	gene_id "YDL173W"; transcript_id "YDL173W"; exon_number "1"; gene_name "PAR32"; gene_source "ensembl"; gene_biotype "protein_coding"; transcript_name "PAR32"; transcript_source "ensembl"; transcript_biotype "protein_coding";
IV	ensembl	stop_codon	149076	149078	.	+	0	gene_id "YDL173W"; transcript_id "YDL173W"; exon_number "1"; gene_name "PAR32"; gene_source "ensembl"; gene_biotype "protein_coding"; transcript_name "PAR32"; transcript_source "ensembl"; transcript_biotype "protein_coding";
IV	ensembl	gene	148607	149086	.	-	.	gene_id "YDL172C"; gene_source "ensembl"; gene_biotype "protein_coding";
IV	ensembl	transcript	148607	149086	.	-	.	gene_id "YDL172C"; transcript_id "YDL172C"; gene_source "ensembl"; gene_biotype "protein_coding"; transcript_name "YDL172C"; transcript_source "ensembl"; transcript_biotype "protein_coding";
IV	ensembl	exon	148607	149086	.	-	.	gene_id "YDL172C"; transcript_id "YDL172C"; exon_number "1"; gene_source "ensembl"; gene_biotype "protein_coding"; transcript_name "YDL172C"; transcript_source "ensembl"; transcript_biotype "protein_coding"; exon_id "YDL172C.1";
IV	ensembl	CDS	148610	149086	.	-	0	gene_id "YDL172C"; transcript_id "YDL172C"; exon_number "1"; gene_source "ensembl"; gene_biotype "protein_coding"; transcript_name "YDL172C"; transcript_source "ensembl"; transcript_biotype "protein_coding"; protein_id "YDL172C";
IV	ensembl	start_codon	149084	149086	.	-	0	gene_id "YDL172C"; transcript_id "YDL172C"; exon_number "1"; gene_source "ensembl"; gene_biotype "protein_coding"; transcript_name "YDL172C"; transcript_source "ensembl"; transcript_biotype "protein_coding";
IV	ensembl	stop_codon	148607	148609	.	-	0	gene_id "YDL172C"; transcript_id "YDL172C"; exon_number "1"; gene_source "ensembl"; gene_biotype "protein_coding"; transcript_name "YDL172C"; transcript_source "ensembl"; transcript_biotype "protein_coding";
IV	ensembl	gene	149203	155640	.	-	.	gene_id "YDL171C"; gene_name "GLT1"; gene_source "ensembl"; gene_biotype "protein_coding";
IV	ensembl	transcript	149203	155640	.	-	.	gene_id "YDL171C"; transcript_id "YDL171C"; gene_name "GLT1"; gene_source "ensembl"; gene_biotype "protein_coding"; transcript_name "GLT1"; transcript_source "ensembl"; transcript_biotype "protein_coding";
IV	ensembl	exon	149203	155640	.	-	.	gene_id "YDL171C"; transcript_id "YDL171C"; exon_number "1"; gene_name "GLT1"; gene_source "ensembl"; gene_biotype "protein_coding"; transcript_name "GLT1"; transcript_source "ensembl"; transcript_biotype "protein_coding"; exon_id "YDL171C.1";
IV	ensembl	CDS	149206	155640	.	-	0	gene_id "YDL171C"; transcript_id "YDL171C"; exon_number "1"; gene_name "GLT1"; gene_source "ensembl"; gene_biotype "protein_coding"; transcript_name "GLT1"; transcript_source "ensembl"; transcript_biotype "protein_coding"; protein_id "YDL171C";
IV	ensembl	start_codon	155638	155640	.	-	0	gene_id "YDL171C"; transcript_id "YDL171C"; exon_number "1"; gene_name "GLT1"; gene_source "ensembl"; gene_biotype "protein_coding"; transcript_name "GLT1"; transcript_source "ensembl"; transcript_biotype "protein_coding";
IV	ensembl	stop_codon	149203	149205	.	-	0	gene_id "YDL171C"; transcript_id "YDL171C"; exon_number "1"; gene_name "GLT1"; gene_source "ensembl"; gene_biotype "protein_coding"; transcript_name "GLT1"; transcript_source "ensembl"; transcript_biotype "protein_coding";
IV	ensembl	gene	156318	157904	.	+	.	gene_id "YDL170W"; gene_name "UGA3"; gene_source "ensembl"; gene_biotype "protein_coding";
IV	ensembl	transcript	156318	157904	.	+	.	gene_id "YDL170W"; transcript_id "YDL170W"; gene_name "UGA3"; gene_source "ensembl"; gene_biotype "protein_coding"; transcript_name "UGA3"; transcript_source "ensembl"; transcript_biotype "protein_coding";
IV	ensembl	exon	156318	157904	.	+	.	gene_id "YDL170W"; transcript_id "YDL170W"; exon_number "1"; gene_name "UGA3"; gene_source "ensembl"; gene_biotype "protein_coding"; transcript_name "UGA3"; transcript_source "ensembl"; transcript_biotype "protein_coding"; exon_id "YDL170W.1";
IV	ensembl	CDS	156318	157901	.	+	0	gene_id "YDL170W"; transcript_id "YDL170W"; exon_number "1"; gene_name "UGA3"; gene_source "ensembl"; gene_biotype "protein_coding"; transcript_name "UGA3"; transcript_source "ensembl"; transcript_biotype "protein_coding"; protein_id "YDL170W";
IV	ensembl	start_codon	156318	156320	.	+	0	gene_id "YDL170W"; transcript_id "YDL170W"; exon_number "1"; gene_name "UGA3"; gene_source "ensembl"; gene_biotype "protein_coding"; transcript_name "UGA3"; transcript_source "ensembl"; transcript_biotype "protein_coding";
IV	ensembl	stop_codon	157902	157904	.	+	0	gene_id "YDL170W"; transcript_id "YDL170W"; exon_number "1"; gene_name "UGA3"; gene_source "ensembl"; gene_biotype "protein_coding"; transcript_name "UGA3"; transcript_source "ensembl"; transcript_biotype "protein_coding";
IV	ensembl	gene	158064	158735	.	-	.	gene_id "YDL169C"; gene_name "UGX2"; gene_source "ensembl"; gene_biotype "protein_coding";
IV	ensembl	transcript	158064	158735	.	-	.	gene_id "YDL169C"; transcript_id "YDL169C"; gene_name "UGX2"; gene_source "ensembl"; gene_biotype "protein_coding"; transcript_name "UGX2"; transcript_source "ensembl"; transcript_biotype "protein_coding";
IV	ensembl	exon	158064	158735	.	-	.	gene_id "YDL169C"; transcript_id "YDL169C"; exon_number "1"; gene_name "UGX2"; gene_source "ensembl"; gene_biotype "protein_coding"; transcript_name "UGX2"; transcript_source "ensembl"; transcript_biotype "protein_coding"; exon_id "YDL169C.1";
IV	ensembl	CDS	158067	158735	.	-	0	gene_id "YDL169C"; transcript_id "YDL169C"; exon_number "1"; gene_name "UGX2"; gene_source "ensembl"; gene_biotype "protein_coding"; transcript_name "UGX2"; transcript_source "ensembl"; transcript_biotype "protein_coding"; protein_id "YDL169C";
IV	ensembl	start_codon	158733	158735	.	-	0	gene_id "YDL169C"; transcript_id "YDL169C"; exon_number "1"; gene_name "UGX2"; gene_source "ensembl"; gene_biotype "protein_coding"; transcript_name "UGX2"; transcript_source "ensembl"; transcript_biotype "protein_coding";
IV	ensembl	stop_codon	158064	158066	.	-	0	gene_id "YDL169C"; transcript_id "YDL169C"; exon_number "1"; gene_name "UGX2"; gene_source "ensembl"; gene_biotype "protein_coding"; transcript_name "UGX2"; transcript_source "ensembl"; transcript_biotype "protein_coding";
IV	ensembl	gene	159604	160764	.	+	.	gene_id "YDL168W"; gene_name "SFA1"; gene_source "ensembl"; gene_biotype "protein_coding";
IV	ensembl	transcript	159604	160764	.	+	.	gene_id "YDL168W"; transcript_id "YDL168W"; gene_name "SFA1"; gene_source "ensembl"; gene_biotype "protein_coding"; transcript_name "SFA1"; transcript_source "ensembl"; transcript_biotype "protein_coding";
IV	ensembl	exon	159604	160764	.	+	.	gene_id "YDL168W"; transcript_id "YDL168W"; exon_number "1"; gene_name "SFA1"; gene_source "ensembl"; gene_biotype "protein_coding"; transcript_name "SFA1"; transcript_source "ensembl"; transcript_biotype "protein_coding"; exon_id "YDL168W.1";
IV	ensembl	CDS	159604	160761	.	+	0	gene_id "YDL168W"; transcript_id "YDL168W"; exon_number "1"; gene_name "SFA1"; gene_source "ensembl"; gene_biotype "protein_coding"; transcript_name "SFA1"; transcript_source "ensembl"; transcript_biotype "protein_coding"; protein_id "YDL168W";
IV	ensembl	start_codon	159604	159606	.	+	0	gene_id "YDL168W"; transcript_id "YDL168W"; exon_number "1"; gene_name "SFA1"; gene_source "ensembl"; gene_biotype "protein_coding"; transcript_name "SFA1"; transcript_source "ensembl"; transcript_biotype "protein_coding";
IV	ensembl	stop_codon	160762	160764	.	+	0	gene_id "YDL168W"; transcript_id "YDL168W"; exon_number "1"; gene_name "SFA1"; gene_source "ensembl"; gene_biotype "protein_coding"; transcript_name "SFA1"; transcript_source "ensembl"; transcript_biotype "protein_coding";
IV	ensembl	gene	160995	163154	.	-	.	gene_id "YDL167C"; gene_name "NRP1"; gene_source "ensembl"; gene_biotype "protein_coding";
IV	ensembl	transcript	160995	163154	.	-	.	gene_id "YDL167C"; transcript_id "YDL167C"; gene_name "NRP1"; gene_source "ensembl"; gene_biotype "protein_coding"; transcript_name "NRP1"; transcript_source "ensembl"; transcript_biotype "protein_coding";
IV	ensembl	exon	160995	163154	.	-	.	gene_id "YDL167C"; transcript_id "YDL167C"; exon_number "1"; gene_name "NRP1"; gene_source "ensembl"; gene_biotype "protein_coding"; transcript_name "NRP1"; transcript_source "ensembl"; transcript_biotype "protein_coding"; exon_id "YDL167C.1";
IV	ensembl	CDS	160998	163154	.	-	0	gene_id "YDL167C"; transcript_id "YDL167C"; exon_number "1"; gene_name "NRP1"; gene_source "ensembl"; gene_biotype "protein_coding"; transcript_name "NRP1"; transcript_source "ensembl"; transcript_biotype "protein_coding"; protein_id "YDL167C";
IV	ensembl	start_codon	163152	163154	.	-	0	gene_id "YDL167C"; transcript_id "YDL167C"; exon_number "1"; gene_name "NRP1"; gene_source "ensembl"; gene_biotype "protein_coding"; transcript_name "NRP1"; transcript_source "ensembl"; transcript_biotype "protein_coding";
IV	ensembl	stop_codon	160995	160997	.	-	0	gene_id "YDL167C"; transcript_id "YDL167C"; exon_number "1"; gene_name "NRP1"; gene_source "ensembl"; gene_biotype "protein_coding"; transcript_name "NRP1"; transcript_source "ensembl"; transcript_biotype "protein_coding";
IV	ensembl	gene	163449	164042	.	-	.	gene_id "YDL166C"; gene_name "FAP7"; gene_source "ensembl"; gene_biotype "protein_coding";
IV	ensembl	transcript	163449	164042	.	-	.	gene_id "YDL166C"; transcript_id "YDL166C"; gene_name "FAP7"; gene_source "ensembl"; gene_biotype "protein_coding"; transcript_name "FAP7"; transcript_source "ensembl"; transcript_biotype "protein_coding";
IV	ensembl	exon	163449	164042	.	-	.	gene_id "YDL166C"; transcript_id "YDL166C"; exon_number "1"; gene_name "FAP7"; gene_source "ensembl"; gene_biotype "protein_coding"; transcript_name "FAP7"; transcript_source "ensembl"; transcript_biotype "protein_coding"; exon_id "YDL166C.1";
IV	ensembl	CDS	163452	164042	.	-	0	gene_id "YDL166C"; transcript_id "YDL166C"; exon_number "1"; gene_name "FAP7"; gene_source "ensembl"; gene_biotype "protein_coding"; transcript_name "FAP7"; transcript_source "ensembl"; transcript_biotype "protein_coding"; protein_id "YDL166C";
IV	ensembl	start_codon	164040	164042	.	-	0	gene_id "YDL166C"; transcript_id "YDL166C"; exon_number "1"; gene_name "FAP7"; gene_source "ensembl"; gene_biotype "protein_coding"; transcript_name "FAP7"; transcript_source "ensembl"; transcript_biotype "protein_coding";
IV	ensembl	stop_codon	163449	163451	.	-	0	gene_id "YDL166C"; transcript_id "YDL166C"; exon_number "1"; gene_name "FAP7"; gene_source "ensembl"; gene_biotype "protein_coding"; transcript_name "FAP7"; transcript_source "ensembl"; transcript_biotype "protein_coding";
IV	ensembl	gene	164290	164865	.	+	.	gene_id "YDL165W"; gene_name "CDC36"; gene_source "ensembl"; gene_biotype "protein_coding";
IV	ensembl	transcript	164290	164865	.	+	.	gene_id "YDL165W"; transcript_id "YDL165W"; gene_name "CDC36"; gene_source "ensembl"; gene_biotype "protein_coding"; transcript_name "CDC36"; transcript_source "ensembl"; transcript_biotype "protein_coding";
IV	ensembl	exon	164290	164865	.	+	.	gene_id "YDL165W"; transcript_id "YDL165W"; exon_number "1"; gene_name "CDC36"; gene_source "ensembl"; gene_biotype "protein_coding"; transcript_name "CDC36"; transcript_source "ensembl"; transcript_biotype "protein_coding"; exon_id "YDL165W.1";
IV	ensembl	CDS	164290	164862	.	+	0	gene_id "YDL165W"; transcript_id "YDL165W"; exon_number "1"; gene_name "CDC36"; gene_source "ensembl"; gene_biotype "protein_coding"; transcript_name "CDC36"; transcript_source "ensembl"; transcript_biotype "protein_coding"; protein_id "YDL165W";
IV	ensembl	start_codon	164290	164292	.	+	0	gene_id "YDL165W"; transcript_id "YDL165W"; exon_number "1"; gene_name "CDC36"; gene_source "ensembl"; gene_biotype "protein_coding"; transcript_name "CDC36"; transcript_source "ensembl"; transcript_biotype "protein_coding";
IV	ensembl	stop_codon	164863	164865	.	+	0	gene_id "YDL165W"; transcript_id "YDL165W"; exon_number "1"; gene_name "CDC36"; gene_source "ensembl"; gene_biotype "protein_coding"; transcript_name "CDC36"; transcript_source "ensembl"; transcript_biotype "protein_coding";
IV	ensembl	gene	164987	167254	.	-	.	gene_id "YDL164C"; gene_name "CDC9"; gene_source "ensembl"; gene_biotype "protein_coding";
IV	ensembl	transcript	164987	167254	.	-	.	gene_id "YDL164C"; transcript_id "YDL164C"; gene_name "CDC9"; gene_source "ensembl"; gene_biotype "protein_coding"; transcript_name "CDC9"; transcript_source "ensembl"; transcript_biotype "protein_coding";
IV	ensembl	exon	164987	167254	.	-	.	gene_id "YDL164C"; transcript_id "YDL164C"; exon_number "1"; gene_name "CDC9"; gene_source "ensembl"; gene_biotype "protein_coding"; transcript_name "CDC9"; transcript_source "ensembl"; transcript_biotype "protein_coding"; exon_id "YDL164C.1";
IV	ensembl	CDS	164990	167254	.	-	0	gene_id "YDL164C"; transcript_id "YDL164C"; exon_number "1"; gene_name "CDC9"; gene_source "ensembl"; gene_biotype "protein_coding"; transcript_name "CDC9"; transcript_source "ensembl"; transcript_biotype "protein_coding"; protein_id "YDL164C";
IV	ensembl	start_codon	167252	167254	.	-	0	gene_id "YDL164C"; transcript_id "YDL164C"; exon_number "1"; gene_name "CDC9"; gene_source "ensembl"; gene_biotype "protein_coding"; transcript_name "CDC9"; transcript_source "ensembl"; transcript_biotype "protein_coding";
IV	ensembl	stop_codon	164987	164989	.	-	0	gene_id "YDL164C"; transcript_id "YDL164C"; exon_number "1"; gene_name "CDC9"; gene_source "ensembl"; gene_biotype "protein_coding"; transcript_name "CDC9"; transcript_source "ensembl"; transcript_biotype "protein_coding";
IV	ensembl	gene	166956	167258	.	+	.	gene_id "YDL163W"; gene_source "ensembl"; gene_biotype "protein_coding";
IV	ensembl	transcript	166956	167258	.	+	.	gene_id "YDL163W"; transcript_id "YDL163W"; gene_source "ensembl"; gene_biotype "protein_coding"; transcript_name "YDL163W"; transcript_source "ensembl"; transcript_biotype "protein_coding";
IV	ensembl	exon	166956	167258	.	+	.	gene_id "YDL163W"; transcript_id "YDL163W"; exon_number "1"; gene_source "ensembl"; gene_biotype "protein_coding"; transcript_name "YDL163W"; transcript_source "ensembl"; transcript_biotype "protein_coding"; exon_id "YDL163W.1";
IV	ensembl	CDS	166956	167255	.	+	0	gene_id "YDL163W"; transcript_id "YDL163W"; exon_number "1"; gene_source "ensembl"; gene_biotype "protein_coding"; transcript_name "YDL163W"; transcript_source "ensembl"; transcript_biotype "protein_coding"; protein_id "YDL163W";
IV	ensembl	start_codon	166956	166958	.	+	0	gene_id "YDL163W"; transcript_id "YDL163W"; exon_number "1"; gene_source "ensembl"; gene_biotype "protein_coding"; transcript_name "YDL163W"; transcript_source "ensembl"; transcript_biotype "protein_coding";
IV	ensembl	stop_codon	167256	167258	.	+	0	gene_id "YDL163W"; transcript_id "YDL163W"; exon_number "1"; gene_source "ensembl"; gene_biotype "protein_coding"; transcript_name "YDL163W"; transcript_source "ensembl"; transcript_biotype "protein_coding";
IV	ensembl	gene	167359	167715	.	-	.	gene_id "YDL162C"; gene_source "ensembl"; gene_biotype "protein_coding";
IV	ensembl	transcript	167359	167715	.	-	.	gene_id "YDL162C"; transcript_id "YDL162C"; gene_source "ensembl"; gene_biotype "protein_coding"; transcript_name "YDL162C"; transcript_source "ensembl"; transcript_biotype "protein_coding";
IV	ensembl	exon	167359	167715	.	-	.	gene_id "YDL162C"; transcript_id "YDL162C"; exon_number "1"; gene_source "ensembl"; gene_biotype "protein_coding"; transcript_name "YDL162C"; transcript_source "ensembl"; transcript_biotype "protein_coding"; exon_id "YDL162C.1";
IV	ensembl	CDS	167362	167715	.	-	0	gene_id "YDL162C"; transcript_id "YDL162C"; exon_number "1"; gene_source "ensembl"; gene_biotype "protein_coding"; transcript_name "YDL162C"; transcript_source "ensembl"; transcript_biotype "protein_coding"; protein_id "YDL162C";
IV	ensembl	start_codon	167713	167715	.	-	0	gene_id "YDL162C"; transcript_id "YDL162C"; exon_number "1"; gene_source "ensembl"; gene_biotype "protein_coding"; transcript_name "YDL162C"; transcript_source "ensembl"; transcript_biotype "protein_coding";
IV	ensembl	stop_codon	167359	167361	.	-	0	gene_id "YDL162C"; transcript_id "YDL162C"; exon_number "1"; gene_source "ensembl"; gene_biotype "protein_coding"; transcript_name "YDL162C"; transcript_source "ensembl"; transcript_biotype "protein_coding";
IV	ensembl	gene	167714	169078	.	+	.	gene_id "YDL161W"; gene_name "ENT1"; gene_source "ensembl"; gene_biotype "protein_coding";
IV	ensembl	transcript	167714	169078	.	+	.	gene_id "YDL161W"; transcript_id "YDL161W"; gene_name "ENT1"; gene_source "ensembl"; gene_biotype "protein_coding"; transcript_name "ENT1"; transcript_source "ensembl"; transcript_biotype "protein_coding";
IV	ensembl	exon	167714	169078	.	+	.	gene_id "YDL161W"; transcript_id "YDL161W"; exon_number "1"; gene_name "ENT1"; gene_source "ensembl"; gene_biotype "protein_coding"; transcript_name "ENT1"; transcript_source "ensembl"; transcript_biotype "protein_coding"; exon_id "YDL161W.1";
IV	ensembl	CDS	167714	169075	.	+	0	gene_id "YDL161W"; transcript_id "YDL161W"; exon_number "1"; gene_name "ENT1"; gene_source "ensembl"; gene_biotype "protein_coding"; transcript_name "ENT1"; transcript_source "ensembl"; transcript_biotype "protein_coding"; protein_id "YDL161W";
IV	ensembl	start_codon	167714	167716	.	+	0	gene_id "YDL161W"; transcript_id "YDL161W"; exon_number "1"; gene_name "ENT1"; gene_source "ensembl"; gene_biotype "protein_coding"; transcript_name "ENT1"; transcript_source "ensembl"; transcript_biotype "protein_coding";
IV	ensembl	stop_codon	169076	169078	.	+	0	gene_id "YDL161W"; transcript_id "YDL161W"; exon_number "1"; gene_name "ENT1"; gene_source "ensembl"; gene_biotype "protein_coding"; transcript_name "ENT1"; transcript_source "ensembl"; transcript_biotype "protein_coding";
IV	ensembl	gene	169366	169608	.	-	.	gene_id "YDL160C-A"; gene_name "MHF2"; gene_source "ensembl"; gene_biotype "protein_coding";
IV	ensembl	transcript	169366	169608	.	-	.	gene_id "YDL160C-A"; transcript_id "YDL160C-A"; gene_name "MHF2"; gene_source "ensembl"; gene_biotype "protein_coding"; transcript_name "YDL160C-A"; transcript_source "ensembl"; transcript_biotype "protein_coding";
IV	ensembl	exon	169366	169608	.	-	.	gene_id "YDL160C-A"; transcript_id "YDL160C-A"; exon_number "1"; gene_name "MHF2"; gene_source "ensembl"; gene_biotype "protein_coding"; transcript_name "YDL160C-A"; transcript_source "ensembl"; transcript_biotype "protein_coding"; exon_id "YDL160C-A.1";
IV	ensembl	CDS	169369	169608	.	-	0	gene_id "YDL160C-A"; transcript_id "YDL160C-A"; exon_number "1"; gene_name "MHF2"; gene_source "ensembl"; gene_biotype "protein_coding"; transcript_name "YDL160C-A"; transcript_source "ensembl"; transcript_biotype "protein_coding"; protein_id "YDL160C-A";
IV	ensembl	start_codon	169606	169608	.	-	0	gene_id "YDL160C-A"; transcript_id "YDL160C-A"; exon_number "1"; gene_name "MHF2"; gene_source "ensembl"; gene_biotype "protein_coding"; transcript_name "YDL160C-A"; transcript_source "ensembl"; transcript_biotype "protein_coding";
IV	ensembl	stop_codon	169366	169368	.	-	0	gene_id "YDL160C-A"; transcript_id "YDL160C-A"; exon_number "1"; gene_name "MHF2"; gene_source "ensembl"; gene_biotype "protein_coding"; transcript_name "YDL160C-A"; transcript_source "ensembl"; transcript_biotype "protein_coding";
IV	ensembl	gene	170410	171930	.	-	.	gene_id "YDL160C"; gene_name "DHH1"; gene_source "ensembl"; gene_biotype "protein_coding";
IV	ensembl	transcript	170410	171930	.	-	.	gene_id "YDL160C"; transcript_id "YDL160C"; gene_name "DHH1"; gene_source "ensembl"; gene_biotype "protein_coding"; transcript_name "DHH1"; transcript_source "ensembl"; transcript_biotype "protein_coding";
IV	ensembl	exon	170410	171930	.	-	.	gene_id "YDL160C"; transcript_id "YDL160C"; exon_number "1"; gene_name "DHH1"; gene_source "ensembl"; gene_biotype "protein_coding"; transcript_name "DHH1"; transcript_source "ensembl"; transcript_biotype "protein_coding"; exon_id "YDL160C.1";
IV	ensembl	CDS	170413	171930	.	-	0	gene_id "YDL160C"; transcript_id "YDL160C"; exon_number "1"; gene_name "DHH1"; gene_source "ensembl"; gene_biotype "protein_coding"; transcript_name "DHH1"; transcript_source "ensembl"; transcript_biotype "protein_coding"; protein_id "YDL160C";
IV	ensembl	start_codon	171928	171930	.	-	0	gene_id "YDL160C"; transcript_id "YDL160C"; exon_number "1"; gene_name "DHH1"; gene_source "ensembl"; gene_biotype "protein_coding"; transcript_name "DHH1"; transcript_source "ensembl"; transcript_biotype "protein_coding";
IV	ensembl	stop_codon	170410	170412	.	-	0	gene_id "YDL160C"; transcript_id "YDL160C"; exon_number "1"; gene_name "DHH1"; gene_source "ensembl"; gene_biotype "protein_coding"; transcript_name "DHH1"; transcript_source "ensembl"; transcript_biotype "protein_coding";
IV	ensembl	gene	172182	172313	.	+	.	gene_id "YDL159W-A"; gene_source "ensembl"; gene_biotype "protein_coding";
IV	ensembl	transcript	172182	172313	.	+	.	gene_id "YDL159W-A"; transcript_id "YDL159W-A"; gene_source "ensembl"; gene_biotype "protein_coding"; transcript_name "YDL159W-A"; transcript_source "ensembl"; transcript_biotype "protein_coding";
IV	ensembl	exon	172182	172313	.	+	.	gene_id "YDL159W-A"; transcript_id "YDL159W-A"; exon_number "1"; gene_source "ensembl"; gene_biotype "protein_coding"; transcript_name "YDL159W-A"; transcript_source "ensembl"; transcript_biotype "protein_coding"; exon_id "YDL159W-A.1";
IV	ensembl	CDS	172182	172310	.	+	0	gene_id "YDL159W-A"; transcript_id "YDL159W-A"; exon_number "1"; gene_source "ensembl"; gene_biotype "protein_coding"; transcript_name "YDL159W-A"; transcript_source "ensembl"; transcript_biotype "protein_coding"; protein_id "YDL159W-A";
IV	ensembl	start_codon	172182	172184	.	+	0	gene_id "YDL159W-A"; transcript_id "YDL159W-A"; exon_number "1"; gene_source "ensembl"; gene_biotype "protein_coding"; transcript_name "YDL159W-A"; transcript_source "ensembl"; transcript_biotype "protein_coding";
IV	ensembl	stop_codon	172311	172313	.	+	0	gene_id "YDL159W-A"; transcript_id "YDL159W-A"; exon_number "1"; gene_source "ensembl"; gene_biotype "protein_coding"; transcript_name "YDL159W-A"; transcript_source "ensembl"; transcript_biotype "protein_coding";
IV	ensembl	gene	172481	174028	.	+	.	gene_id "YDL159W"; gene_name "STE7"; gene_source "ensembl"; gene_biotype "protein_coding";
IV	ensembl	transcript	172481	174028	.	+	.	gene_id "YDL159W"; transcript_id "YDL159W"; gene_name "STE7"; gene_source "ensembl"; gene_biotype "protein_coding"; transcript_name "STE7"; transcript_source "ensembl"; transcript_biotype "protein_coding";
IV	ensembl	exon	172481	174028	.	+	.	gene_id "YDL159W"; transcript_id "YDL159W"; exon_number "1"; gene_name "STE7"; gene_source "ensembl"; gene_biotype "protein_coding"; transcript_name "STE7"; transcript_source "ensembl"; transcript_biotype "protein_coding"; exon_id "YDL159W.1";
IV	ensembl	CDS	172481	174025	.	+	0	gene_id "YDL159W"; transcript_id "YDL159W"; exon_number "1"; gene_name "STE7"; gene_source "ensembl"; gene_biotype "protein_coding"; transcript_name "STE7"; transcript_source "ensembl"; transcript_biotype "protein_coding"; protein_id "YDL159W";
IV	ensembl	start_codon	172481	172483	.	+	0	gene_id "YDL159W"; transcript_id "YDL159W"; exon_number "1"; gene_name "STE7"; gene_source "ensembl"; gene_biotype "protein_coding"; transcript_name "STE7"; transcript_source "ensembl"; transcript_biotype "protein_coding";
IV	ensembl	stop_codon	174026	174028	.	+	0	gene_id "YDL159W"; transcript_id "YDL159W"; exon_number "1"; gene_name "STE7"; gene_source "ensembl"; gene_biotype "protein_coding"; transcript_name "STE7"; transcript_source "ensembl"; transcript_biotype "protein_coding";
IV	ensembl	gene	173056	173232	.	-	.	gene_id "YDL159C-B"; gene_source "ensembl"; gene_biotype "protein_coding";
IV	ensembl	transcript	173056	173232	.	-	.	gene_id "YDL159C-B"; transcript_id "YDL159C-B"; gene_source "ensembl"; gene_biotype "protein_coding"; transcript_name "YDL159C-B"; transcript_source "ensembl"; transcript_biotype "protein_coding";
IV	ensembl	exon	173056	173232	.	-	.	gene_id "YDL159C-B"; transcript_id "YDL159C-B"; exon_number "1"; gene_source "ensembl"; gene_biotype "protein_coding"; transcript_name "YDL159C-B"; transcript_source "ensembl"; transcript_biotype "protein_coding"; exon_id "YDL159C-B.1";
IV	ensembl	CDS	173059	173232	.	-	0	gene_id "YDL159C-B"; transcript_id "YDL159C-B"; exon_number "1"; gene_source "ensembl"; gene_biotype "protein_coding"; transcript_name "YDL159C-B"; transcript_source "ensembl"; transcript_biotype "protein_coding"; protein_id "YDL159C-B";
IV	ensembl	start_codon	173230	173232	.	-	0	gene_id "YDL159C-B"; transcript_id "YDL159C-B"; exon_number "1"; gene_source "ensembl"; gene_biotype "protein_coding"; transcript_name "YDL159C-B"; transcript_source "ensembl"; transcript_biotype "protein_coding";
IV	ensembl	stop_codon	173056	173058	.	-	0	gene_id "YDL159C-B"; transcript_id "YDL159C-B"; exon_number "1"; gene_source "ensembl"; gene_biotype "protein_coding"; transcript_name "YDL159C-B"; transcript_source "ensembl"; transcript_biotype "protein_coding";
IV	ensembl	gene	173866	174174	.	-	.	gene_id "YDL158C"; gene_source "ensembl"; gene_biotype "protein_coding";
IV	ensembl	transcript	173866	174174	.	-	.	gene_id "YDL158C"; transcript_id "YDL158C"; gene_source "ensembl"; gene_biotype "protein_coding"; transcript_name "YDL158C"; transcript_source "ensembl"; transcript_biotype "protein_coding";
IV	ensembl	exon	173866	174174	.	-	.	gene_id "YDL158C"; transcript_id "YDL158C"; exon_number "1"; gene_source "ensembl"; gene_biotype "protein_coding"; transcript_name "YDL158C"; transcript_source "ensembl"; transcript_biotype "protein_coding"; exon_id "YDL158C.1";
IV	ensembl	CDS	173869	174174	.	-	0	gene_id "YDL158C"; transcript_id "YDL158C"; exon_number "1"; gene_source "ensembl"; gene_biotype "protein_coding"; transcript_name "YDL158C"; transcript_source "ensembl"; transcript_biotype "protein_coding"; protein_id "YDL158C";
IV	ensembl	start_codon	174172	174174	.	-	0	gene_id "YDL158C"; transcript_id "YDL158C"; exon_number "1"; gene_source "ensembl"; gene_biotype "protein_coding"; transcript_name "YDL158C"; transcript_source "ensembl"; transcript_biotype "protein_coding";
IV	ensembl	stop_codon	173866	173868	.	-	0	gene_id "YDL158C"; transcript_id "YDL158C"; exon_number "1"; gene_source "ensembl"; gene_biotype "protein_coding"; transcript_name "YDL158C"; transcript_source "ensembl"; transcript_biotype "protein_coding";
IV	ensembl	gene	174232	174588	.	-	.	gene_id "YDL157C"; gene_source "ensembl"; gene_biotype "protein_coding";
IV	ensembl	transcript	174232	174588	.	-	.	gene_id "YDL157C"; transcript_id "YDL157C"; gene_source "ensembl"; gene_biotype "protein_coding"; transcript_name "YDL157C"; transcript_source "ensembl"; transcript_biotype "protein_coding";
IV	ensembl	exon	174232	174588	.	-	.	gene_id "YDL157C"; transcript_id "YDL157C"; exon_number "1"; gene_source "ensembl"; gene_biotype "protein_coding"; transcript_name "YDL157C"; transcript_source "ensembl"; transcript_biotype "protein_coding"; exon_id "YDL157C.1";
IV	ensembl	CDS	174235	174588	.	-	0	gene_id "YDL157C"; transcript_id "YDL157C"; exon_number "1"; gene_source "ensembl"; gene_biotype "protein_coding"; transcript_name "YDL157C"; transcript_source "ensembl"; transcript_biotype "protein_coding"; protein_id "YDL157C";
IV	ensembl	start_codon	174586	174588	.	-	0	gene_id "YDL157C"; transcript_id "YDL157C"; exon_number "1"; gene_source "ensembl"; gene_biotype "protein_coding"; transcript_name "YDL157C"; transcript_source "ensembl"; transcript_biotype "protein_coding";
IV	ensembl	stop_codon	174232	174234	.	-	0	gene_id "YDL157C"; transcript_id "YDL157C"; exon_number "1"; gene_source "ensembl"; gene_biotype "protein_coding"; transcript_name "YDL157C"; transcript_source "ensembl"; transcript_biotype "protein_coding";
IV	ensembl	gene	174918	176486	.	+	.	gene_id "YDL156W"; gene_name "CMR1"; gene_source "ensembl"; gene_biotype "protein_coding";
IV	ensembl	transcript	174918	176486	.	+	.	gene_id "YDL156W"; transcript_id "YDL156W"; gene_name "CMR1"; gene_source "ensembl"; gene_biotype "protein_coding"; transcript_name "YDL156W"; transcript_source "ensembl"; transcript_biotype "protein_coding";
IV	ensembl	exon	174918	176486	.	+	.	gene_id "YDL156W"; transcript_id "YDL156W"; exon_number "1"; gene_name "CMR1"; gene_source "ensembl"; gene_biotype "protein_coding"; transcript_name "YDL156W"; transcript_source "ensembl"; transcript_biotype "protein_coding"; exon_id "YDL156W.1";
IV	ensembl	CDS	174918	176483	.	+	0	gene_id "YDL156W"; transcript_id "YDL156W"; exon_number "1"; gene_name "CMR1"; gene_source "ensembl"; gene_biotype "protein_coding"; transcript_name "YDL156W"; transcript_source "ensembl"; transcript_biotype "protein_coding"; protein_id "YDL156W";
IV	ensembl	start_codon	174918	174920	.	+	0	gene_id "YDL156W"; transcript_id "YDL156W"; exon_number "1"; gene_name "CMR1"; gene_source "ensembl"; gene_biotype "protein_coding"; transcript_name "YDL156W"; transcript_source "ensembl"; transcript_biotype "protein_coding";
IV	ensembl	stop_codon	176484	176486	.	+	0	gene_id "YDL156W"; transcript_id "YDL156W"; exon_number "1"; gene_name "CMR1"; gene_source "ensembl"; gene_biotype "protein_coding"; transcript_name "YDL156W"; transcript_source "ensembl"; transcript_biotype "protein_coding";
IV	ensembl	gene	176773	178056	.	+	.	gene_id "YDL155W"; gene_name "CLB3"; gene_source "ensembl"; gene_biotype "protein_coding";
IV	ensembl	transcript	176773	178056	.	+	.	gene_id "YDL155W"; transcript_id "YDL155W"; gene_name "CLB3"; gene_source "ensembl"; gene_biotype "protein_coding"; transcript_name "CLB3"; transcript_source "ensembl"; transcript_biotype "protein_coding";
IV	ensembl	exon	176773	178056	.	+	.	gene_id "YDL155W"; transcript_id "YDL155W"; exon_number "1"; gene_name "CLB3"; gene_source "ensembl"; gene_biotype "protein_coding"; transcript_name "CLB3"; transcript_source "ensembl"; transcript_biotype "protein_coding"; exon_id "YDL155W.1";
IV	ensembl	CDS	176773	178053	.	+	0	gene_id "YDL155W"; transcript_id "YDL155W"; exon_number "1"; gene_name "CLB3"; gene_source "ensembl"; gene_biotype "protein_coding"; transcript_name "CLB3"; transcript_source "ensembl"; transcript_biotype "protein_coding"; protein_id "YDL155W";
IV	ensembl	start_codon	176773	176775	.	+	0	gene_id "YDL155W"; transcript_id "YDL155W"; exon_number "1"; gene_name "CLB3"; gene_source "ensembl"; gene_biotype "protein_coding"; transcript_name "CLB3"; transcript_source "ensembl"; transcript_biotype "protein_coding";
IV	ensembl	stop_codon	178054	178056	.	+	0	gene_id "YDL155W"; transcript_id "YDL155W"; exon_number "1"; gene_name "CLB3"; gene_source "ensembl"; gene_biotype "protein_coding"; transcript_name "CLB3"; transcript_source "ensembl"; transcript_biotype "protein_coding";
IV	ensembl	gene	178334	181039	.	+	.	gene_id "YDL154W"; gene_name "MSH5"; gene_source "ensembl"; gene_biotype "protein_coding";
IV	ensembl	transcript	178334	181039	.	+	.	gene_id "YDL154W"; transcript_id "YDL154W"; gene_name "MSH5"; gene_source "ensembl"; gene_biotype "protein_coding"; transcript_name "MSH5"; transcript_source "ensembl"; transcript_biotype "protein_coding";
IV	ensembl	exon	178334	181039	.	+	.	gene_id "YDL154W"; transcript_id "YDL154W"; exon_number "1"; gene_name "MSH5"; gene_source "ensembl"; gene_biotype "protein_coding"; transcript_name "MSH5"; transcript_source "ensembl"; transcript_biotype "protein_coding"; exon_id "YDL154W.1";
IV	ensembl	CDS	178334	181036	.	+	0	gene_id "YDL154W"; transcript_id "YDL154W"; exon_number "1"; gene_name "MSH5"; gene_source "ensembl"; gene_biotype "protein_coding"; transcript_name "MSH5"; transcript_source "ensembl"; transcript_biotype "protein_coding"; protein_id "YDL154W";
IV	ensembl	start_codon	178334	178336	.	+	0	gene_id "YDL154W"; transcript_id "YDL154W"; exon_number "1"; gene_name "MSH5"; gene_source "ensembl"; gene_biotype "protein_coding"; transcript_name "MSH5"; transcript_source "ensembl"; transcript_biotype "protein_coding";
IV	ensembl	stop_codon	181037	181039	.	+	0	gene_id "YDL154W"; transcript_id "YDL154W"; exon_number "1"; gene_name "MSH5"; gene_source "ensembl"; gene_biotype "protein_coding"; transcript_name "MSH5"; transcript_source "ensembl"; transcript_biotype "protein_coding";
IV	ensembl	gene	181186	183018	.	-	.	gene_id "YDL153C"; gene_name "SAS10"; gene_source "ensembl"; gene_biotype "protein_coding";
IV	ensembl	transcript	181186	183018	.	-	.	gene_id "YDL153C"; transcript_id "YDL153C"; gene_name "SAS10"; gene_source "ensembl"; gene_biotype "protein_coding"; transcript_name "SAS10"; transcript_source "ensembl"; transcript_biotype "protein_coding";
IV	ensembl	exon	181186	183018	.	-	.	gene_id "YDL153C"; transcript_id "YDL153C"; exon_number "1"; gene_name "SAS10"; gene_source "ensembl"; gene_biotype "protein_coding"; transcript_name "SAS10"; transcript_source "ensembl"; transcript_biotype "protein_coding"; exon_id "YDL153C.1";
IV	ensembl	CDS	181189	183018	.	-	0	gene_id "YDL153C"; transcript_id "YDL153C"; exon_number "1"; gene_name "SAS10"; gene_source "ensembl"; gene_biotype "protein_coding"; transcript_name "SAS10"; transcript_source "ensembl"; transcript_biotype "protein_coding"; protein_id "YDL153C";
IV	ensembl	start_codon	183016	183018	.	-	0	gene_id "YDL153C"; transcript_id "YDL153C"; exon_number "1"; gene_name "SAS10"; gene_source "ensembl"; gene_biotype "protein_coding"; transcript_name "SAS10"; transcript_source "ensembl"; transcript_biotype "protein_coding";
IV	ensembl	stop_codon	181186	181188	.	-	0	gene_id "YDL153C"; transcript_id "YDL153C"; exon_number "1"; gene_name "SAS10"; gene_source "ensembl"; gene_biotype "protein_coding"; transcript_name "SAS10"; transcript_source "ensembl"; transcript_biotype "protein_coding";
IV	ensembl	gene	182822	183187	.	+	.	gene_id "YDL152W"; gene_source "ensembl"; gene_biotype "protein_coding";
IV	ensembl	transcript	182822	183187	.	+	.	gene_id "YDL152W"; transcript_id "YDL152W"; gene_source "ensembl"; gene_biotype "protein_coding"; transcript_name "YDL152W"; transcript_source "ensembl"; transcript_biotype "protein_coding";
IV	ensembl	exon	182822	183187	.	+	.	gene_id "YDL152W"; transcript_id "YDL152W"; exon_number "1"; gene_source "ensembl"; gene_biotype "protein_coding"; transcript_name "YDL152W"; transcript_source "ensembl"; transcript_biotype "protein_coding"; exon_id "YDL152W.1";
IV	ensembl	CDS	182822	183184	.	+	0	gene_id "YDL152W"; transcript_id "YDL152W"; exon_number "1"; gene_source "ensembl"; gene_biotype "protein_coding"; transcript_name "YDL152W"; transcript_source "ensembl"; transcript_biotype "protein_coding"; protein_id "YDL152W";
IV	ensembl	start_codon	182822	182824	.	+	0	gene_id "YDL152W"; transcript_id "YDL152W"; exon_number "1"; gene_source "ensembl"; gene_biotype "protein_coding"; transcript_name "YDL152W"; transcript_source "ensembl"; transcript_biotype "protein_coding";
IV	ensembl	stop_codon	183185	183187	.	+	0	gene_id "YDL152W"; transcript_id "YDL152W"; exon_number "1"; gene_source "ensembl"; gene_biotype "protein_coding"; transcript_name "YDL152W"; transcript_source "ensembl"; transcript_biotype "protein_coding";
IV	ensembl	gene	183318	183899	.	-	.	gene_id "YDL151C"; gene_name "BUD30"; gene_source "ensembl"; gene_biotype "protein_coding";
IV	ensembl	transcript	183318	183899	.	-	.	gene_id "YDL151C"; transcript_id "YDL151C"; gene_name "BUD30"; gene_source "ensembl"; gene_biotype "protein_coding"; transcript_name "BUD30"; transcript_source "ensembl"; transcript_biotype "protein_coding";
IV	ensembl	exon	183318	183899	.	-	.	gene_id "YDL151C"; transcript_id "YDL151C"; exon_number "1"; gene_name "BUD30"; gene_source "ensembl"; gene_biotype "protein_coding"; transcript_name "BUD30"; transcript_source "ensembl"; transcript_biotype "protein_coding"; exon_id "YDL151C.1";
IV	ensembl	CDS	183321	183899	.	-	0	gene_id "YDL151C"; transcript_id "YDL151C"; exon_number "1"; gene_name "BUD30"; gene_source "ensembl"; gene_biotype "protein_coding"; transcript_name "BUD30"; transcript_source "ensembl"; transcript_biotype "protein_coding"; protein_id "YDL151C";
IV	ensembl	start_codon	183897	183899	.	-	0	gene_id "YDL151C"; transcript_id "YDL151C"; exon_number "1"; gene_name "BUD30"; gene_source "ensembl"; gene_biotype "protein_coding"; transcript_name "BUD30"; transcript_source "ensembl"; transcript_biotype "protein_coding";
IV	ensembl	stop_codon	183318	183320	.	-	0	gene_id "YDL151C"; transcript_id "YDL151C"; exon_number "1"; gene_name "BUD30"; gene_source "ensembl"; gene_biotype "protein_coding"; transcript_name "BUD30"; transcript_source "ensembl"; transcript_biotype "protein_coding";
IV	ensembl	gene	183343	184611	.	+	.	gene_id "YDL150W"; gene_name "RPC53"; gene_source "ensembl"; gene_biotype "protein_coding";
IV	ensembl	transcript	183343	184611	.	+	.	gene_id "YDL150W"; transcript_id "YDL150W"; gene_name "RPC53"; gene_source "ensembl"; gene_biotype "protein_coding"; transcript_name "RPC53"; transcript_source "ensembl"; transcript_biotype "protein_coding";
IV	ensembl	exon	183343	184611	.	+	.	gene_id "YDL150W"; transcript_id "YDL150W"; exon_number "1"; gene_name "RPC53"; gene_source "ensembl"; gene_biotype "protein_coding"; transcript_name "RPC53"; transcript_source "ensembl"; transcript_biotype "protein_coding"; exon_id "YDL150W.1";
IV	ensembl	CDS	183343	184608	.	+	0	gene_id "YDL150W"; transcript_id "YDL150W"; exon_number "1"; gene_name "RPC53"; gene_source "ensembl"; gene_biotype "protein_coding"; transcript_name "RPC53"; transcript_source "ensembl"; transcript_biotype "protein_coding"; protein_id "YDL150W";
IV	ensembl	start_codon	183343	183345	.	+	0	gene_id "YDL150W"; transcript_id "YDL150W"; exon_number "1"; gene_name "RPC53"; gene_source "ensembl"; gene_biotype "protein_coding"; transcript_name "RPC53"; transcript_source "ensembl"; transcript_biotype "protein_coding";
IV	ensembl	stop_codon	184609	184611	.	+	0	gene_id "YDL150W"; transcript_id "YDL150W"; exon_number "1"; gene_name "RPC53"; gene_source "ensembl"; gene_biotype "protein_coding"; transcript_name "RPC53"; transcript_source "ensembl"; transcript_biotype "protein_coding";
IV	ensembl	gene	184925	187918	.	+	.	gene_id "YDL149W"; gene_name "ATG9"; gene_source "ensembl"; gene_biotype "protein_coding";
IV	ensembl	transcript	184925	187918	.	+	.	gene_id "YDL149W"; transcript_id "YDL149W"; gene_name "ATG9"; gene_source "ensembl"; gene_biotype "protein_coding"; transcript_name "ATG9"; transcript_source "ensembl"; transcript_biotype "protein_coding";
IV	ensembl	exon	184925	187918	.	+	.	gene_id "YDL149W"; transcript_id "YDL149W"; exon_number "1"; gene_name "ATG9"; gene_source "ensembl"; gene_biotype "protein_coding"; transcript_name "ATG9"; transcript_source "ensembl"; transcript_biotype "protein_coding"; exon_id "YDL149W.1";
IV	ensembl	CDS	184925	187915	.	+	0	gene_id "YDL149W"; transcript_id "YDL149W"; exon_number "1"; gene_name "ATG9"; gene_source "ensembl"; gene_biotype "protein_coding"; transcript_name "ATG9"; transcript_source "ensembl"; transcript_biotype "protein_coding"; protein_id "YDL149W";
IV	ensembl	start_codon	184925	184927	.	+	0	gene_id "YDL149W"; transcript_id "YDL149W"; exon_number "1"; gene_name "ATG9"; gene_source "ensembl"; gene_biotype "protein_coding"; transcript_name "ATG9"; transcript_source "ensembl"; transcript_biotype "protein_coding";
IV	ensembl	stop_codon	187916	187918	.	+	0	gene_id "YDL149W"; transcript_id "YDL149W"; exon_number "1"; gene_name "ATG9"; gene_source "ensembl"; gene_biotype "protein_coding"; transcript_name "ATG9"; transcript_source "ensembl"; transcript_biotype "protein_coding";
IV	ensembl	gene	188154	190586	.	-	.	gene_id "YDL148C"; gene_name "NOP14"; gene_source "ensembl"; gene_biotype "protein_coding";
IV	ensembl	transcript	188154	190586	.	-	.	gene_id "YDL148C"; transcript_id "YDL148C"; gene_name "NOP14"; gene_source "ensembl"; gene_biotype "protein_coding"; transcript_name "NOP14"; transcript_source "ensembl"; transcript_biotype "protein_coding";
IV	ensembl	exon	188154	190586	.	-	.	gene_id "YDL148C"; transcript_id "YDL148C"; exon_number "1"; gene_name "NOP14"; gene_source "ensembl"; gene_biotype "protein_coding"; transcript_name "NOP14"; transcript_source "ensembl"; transcript_biotype "protein_coding"; exon_id "YDL148C.1";
IV	ensembl	CDS	188157	190586	.	-	0	gene_id "YDL148C"; transcript_id "YDL148C"; exon_number "1"; gene_name "NOP14"; gene_source "ensembl"; gene_biotype "protein_coding"; transcript_name "NOP14"; transcript_source "ensembl"; transcript_biotype "protein_coding"; protein_id "YDL148C";
IV	ensembl	start_codon	190584	190586	.	-	0	gene_id "YDL148C"; transcript_id "YDL148C"; exon_number "1"; gene_name "NOP14"; gene_source "ensembl"; gene_biotype "protein_coding"; transcript_name "NOP14"; transcript_source "ensembl"; transcript_biotype "protein_coding";
IV	ensembl	stop_codon	188154	188156	.	-	0	gene_id "YDL148C"; transcript_id "YDL148C"; exon_number "1"; gene_name "NOP14"; gene_source "ensembl"; gene_biotype "protein_coding"; transcript_name "NOP14"; transcript_source "ensembl"; transcript_biotype "protein_coding";
IV	ensembl	gene	190924	192261	.	+	.	gene_id "YDL147W"; gene_name "RPN5"; gene_source "ensembl"; gene_biotype "protein_coding";
IV	ensembl	transcript	190924	192261	.	+	.	gene_id "YDL147W"; transcript_id "YDL147W"; gene_name "RPN5"; gene_source "ensembl"; gene_biotype "protein_coding"; transcript_name "RPN5"; transcript_source "ensembl"; transcript_biotype "protein_coding";
IV	ensembl	exon	190924	192261	.	+	.	gene_id "YDL147W"; transcript_id "YDL147W"; exon_number "1"; gene_name "RPN5"; gene_source "ensembl"; gene_biotype "protein_coding"; transcript_name "RPN5"; transcript_source "ensembl"; transcript_biotype "protein_coding"; exon_id "YDL147W.1";
IV	ensembl	CDS	190924	192258	.	+	0	gene_id "YDL147W"; transcript_id "YDL147W"; exon_number "1"; gene_name "RPN5"; gene_source "ensembl"; gene_biotype "protein_coding"; transcript_name "RPN5"; transcript_source "ensembl"; transcript_biotype "protein_coding"; protein_id "YDL147W";
IV	ensembl	start_codon	190924	190926	.	+	0	gene_id "YDL147W"; transcript_id "YDL147W"; exon_number "1"; gene_name "RPN5"; gene_source "ensembl"; gene_biotype "protein_coding"; transcript_name "RPN5"; transcript_source "ensembl"; transcript_biotype "protein_coding";
IV	ensembl	stop_codon	192259	192261	.	+	0	gene_id "YDL147W"; transcript_id "YDL147W"; exon_number "1"; gene_name "RPN5"; gene_source "ensembl"; gene_biotype "protein_coding"; transcript_name "RPN5"; transcript_source "ensembl"; transcript_biotype "protein_coding";
IV	ensembl	gene	192750	194225	.	+	.	gene_id "YDL146W"; gene_name "LDB17"; gene_source "ensembl"; gene_biotype "protein_coding";
IV	ensembl	transcript	192750	194225	.	+	.	gene_id "YDL146W"; transcript_id "YDL146W"; gene_name "LDB17"; gene_source "ensembl"; gene_biotype "protein_coding"; transcript_name "LDB17"; transcript_source "ensembl"; transcript_biotype "protein_coding";
IV	ensembl	exon	192750	194225	.	+	.	gene_id "YDL146W"; transcript_id "YDL146W"; exon_number "1"; gene_name "LDB17"; gene_source "ensembl"; gene_biotype "protein_coding"; transcript_name "LDB17"; transcript_source "ensembl"; transcript_biotype "protein_coding"; exon_id "YDL146W.1";
IV	ensembl	CDS	192750	194222	.	+	0	gene_id "YDL146W"; transcript_id "YDL146W"; exon_number "1"; gene_name "LDB17"; gene_source "ensembl"; gene_biotype "protein_coding"; transcript_name "LDB17"; transcript_source "ensembl"; transcript_biotype "protein_coding"; protein_id "YDL146W";
IV	ensembl	start_codon	192750	192752	.	+	0	gene_id "YDL146W"; transcript_id "YDL146W"; exon_number "1"; gene_name "LDB17"; gene_source "ensembl"; gene_biotype "protein_coding"; transcript_name "LDB17"; transcript_source "ensembl"; transcript_biotype "protein_coding";
IV	ensembl	stop_codon	194223	194225	.	+	0	gene_id "YDL146W"; transcript_id "YDL146W"; exon_number "1"; gene_name "LDB17"; gene_source "ensembl"; gene_biotype "protein_coding"; transcript_name "LDB17"; transcript_source "ensembl"; transcript_biotype "protein_coding";
IV	ensembl	gene	194571	198176	.	-	.	gene_id "YDL145C"; gene_name "COP1"; gene_source "ensembl"; gene_biotype "protein_coding";
IV	ensembl	transcript	194571	198176	.	-	.	gene_id "YDL145C"; transcript_id "YDL145C"; gene_name "COP1"; gene_source "ensembl"; gene_biotype "protein_coding"; transcript_name "COP1"; transcript_source "ensembl"; transcript_biotype "protein_coding";
IV	ensembl	exon	194571	198176	.	-	.	gene_id "YDL145C"; transcript_id "YDL145C"; exon_number "1"; gene_name "COP1"; gene_source "ensembl"; gene_biotype "protein_coding"; transcript_name "COP1"; transcript_source "ensembl"; transcript_biotype "protein_coding"; exon_id "YDL145C.1";
IV	ensembl	CDS	194574	198176	.	-	0	gene_id "YDL145C"; transcript_id "YDL145C"; exon_number "1"; gene_name "COP1"; gene_source "ensembl"; gene_biotype "protein_coding"; transcript_name "COP1"; transcript_source "ensembl"; transcript_biotype "protein_coding"; protein_id "YDL145C";
IV	ensembl	start_codon	198174	198176	.	-	0	gene_id "YDL145C"; transcript_id "YDL145C"; exon_number "1"; gene_name "COP1"; gene_source "ensembl"; gene_biotype "protein_coding"; transcript_name "COP1"; transcript_source "ensembl"; transcript_biotype "protein_coding";
IV	ensembl	stop_codon	194571	194573	.	-	0	gene_id "YDL145C"; transcript_id "YDL145C"; exon_number "1"; gene_name "COP1"; gene_source "ensembl"; gene_biotype "protein_coding"; transcript_name "COP1"; transcript_source "ensembl"; transcript_biotype "protein_coding";
IV	ensembl	gene	198662	199732	.	-	.	gene_id "YDL144C"; gene_source "ensembl"; gene_biotype "protein_coding";
IV	ensembl	transcript	198662	199732	.	-	.	gene_id "YDL144C"; transcript_id "YDL144C"; gene_source "ensembl"; gene_biotype "protein_coding"; transcript_name "YDL144C"; transcript_source "ensembl"; transcript_biotype "protein_coding";
IV	ensembl	exon	198662	199732	.	-	.	gene_id "YDL144C"; transcript_id "YDL144C"; exon_number "1"; gene_source "ensembl"; gene_biotype "protein_coding"; transcript_name "YDL144C"; transcript_source "ensembl"; transcript_biotype "protein_coding"; exon_id "YDL144C.1";
IV	ensembl	CDS	198665	199732	.	-	0	gene_id "YDL144C"; transcript_id "YDL144C"; exon_number "1"; gene_source "ensembl"; gene_biotype "protein_coding"; transcript_name "YDL144C"; transcript_source "ensembl"; transcript_biotype "protein_coding"; protein_id "YDL144C";
IV	ensembl	start_codon	199730	199732	.	-	0	gene_id "YDL144C"; transcript_id "YDL144C"; exon_number "1"; gene_source "ensembl"; gene_biotype "protein_coding"; transcript_name "YDL144C"; transcript_source "ensembl"; transcript_biotype "protein_coding";
IV	ensembl	stop_codon	198662	198664	.	-	0	gene_id "YDL144C"; transcript_id "YDL144C"; exon_number "1"; gene_source "ensembl"; gene_biotype "protein_coding"; transcript_name "YDL144C"; transcript_source "ensembl"; transcript_biotype "protein_coding";
IV	ensembl	gene	199996	201582	.	+	.	gene_id "YDL143W"; gene_name "CCT4"; gene_source "ensembl"; gene_biotype "protein_coding";
IV	ensembl	transcript	199996	201582	.	+	.	gene_id "YDL143W"; transcript_id "YDL143W"; gene_name "CCT4"; gene_source "ensembl"; gene_biotype "protein_coding"; transcript_name "CCT4"; transcript_source "ensembl"; transcript_biotype "protein_coding";
IV	ensembl	exon	199996	201582	.	+	.	gene_id "YDL143W"; transcript_id "YDL143W"; exon_number "1"; gene_name "CCT4"; gene_source "ensembl"; gene_biotype "protein_coding"; transcript_name "CCT4"; transcript_source "ensembl"; transcript_biotype "protein_coding"; exon_id "YDL143W.1";
IV	ensembl	CDS	199996	201579	.	+	0	gene_id "YDL143W"; transcript_id "YDL143W"; exon_number "1"; gene_name "CCT4"; gene_source "ensembl"; gene_biotype "protein_coding"; transcript_name "CCT4"; transcript_source "ensembl"; transcript_biotype "protein_coding"; protein_id "YDL143W";
IV	ensembl	start_codon	199996	199998	.	+	0	gene_id "YDL143W"; transcript_id "YDL143W"; exon_number "1"; gene_name "CCT4"; gene_source "ensembl"; gene_biotype "protein_coding"; transcript_name "CCT4"; transcript_source "ensembl"; transcript_biotype "protein_coding";
IV	ensembl	stop_codon	201580	201582	.	+	0	gene_id "YDL143W"; transcript_id "YDL143W"; exon_number "1"; gene_name "CCT4"; gene_source "ensembl"; gene_biotype "protein_coding"; transcript_name "CCT4"; transcript_source "ensembl"; transcript_biotype "protein_coding";
IV	ensembl	gene	201719	202570	.	-	.	gene_id "YDL142C"; gene_name "CRD1"; gene_source "ensembl"; gene_biotype "protein_coding";
IV	ensembl	transcript	201719	202570	.	-	.	gene_id "YDL142C"; transcript_id "YDL142C"; gene_name "CRD1"; gene_source "ensembl"; gene_biotype "protein_coding"; transcript_name "CRD1"; transcript_source "ensembl"; transcript_biotype "protein_coding";
IV	ensembl	exon	201719	202570	.	-	.	gene_id "YDL142C"; transcript_id "YDL142C"; exon_number "1"; gene_name "CRD1"; gene_source "ensembl"; gene_biotype "protein_coding"; transcript_name "CRD1"; transcript_source "ensembl"; transcript_biotype "protein_coding"; exon_id "YDL142C.1";
IV	ensembl	CDS	201722	202570	.	-	0	gene_id "YDL142C"; transcript_id "YDL142C"; exon_number "1"; gene_name "CRD1"; gene_source "ensembl"; gene_biotype "protein_coding"; transcript_name "CRD1"; transcript_source "ensembl"; transcript_biotype "protein_coding"; protein_id "YDL142C";
IV	ensembl	start_codon	202568	202570	.	-	0	gene_id "YDL142C"; transcript_id "YDL142C"; exon_number "1"; gene_name "CRD1"; gene_source "ensembl"; gene_biotype "protein_coding"; transcript_name "CRD1"; transcript_source "ensembl"; transcript_biotype "protein_coding";
IV	ensembl	stop_codon	201719	201721	.	-	0	gene_id "YDL142C"; transcript_id "YDL142C"; exon_number "1"; gene_name "CRD1"; gene_source "ensembl"; gene_biotype "protein_coding"; transcript_name "CRD1"; transcript_source "ensembl"; transcript_biotype "protein_coding";
IV	ensembl	gene	203039	205111	.	+	.	gene_id "YDL141W"; gene_name "BPL1"; gene_source "ensembl"; gene_biotype "protein_coding";
IV	ensembl	transcript	203039	205111	.	+	.	gene_id "YDL141W"; transcript_id "YDL141W"; gene_name "BPL1"; gene_source "ensembl"; gene_biotype "protein_coding"; transcript_name "BPL1"; transcript_source "ensembl"; transcript_biotype "protein_coding";
IV	ensembl	exon	203039	205111	.	+	.	gene_id "YDL141W"; transcript_id "YDL141W"; exon_number "1"; gene_name "BPL1"; gene_source "ensembl"; gene_biotype "protein_coding"; transcript_name "BPL1"; transcript_source "ensembl"; transcript_biotype "protein_coding"; exon_id "YDL141W.1";
IV	ensembl	CDS	203039	205108	.	+	0	gene_id "YDL141W"; transcript_id "YDL141W"; exon_number "1"; gene_name "BPL1"; gene_source "ensembl"; gene_biotype "protein_coding"; transcript_name "BPL1"; transcript_source "ensembl"; transcript_biotype "protein_coding"; protein_id "YDL141W";
IV	ensembl	start_codon	203039	203041	.	+	0	gene_id "YDL141W"; transcript_id "YDL141W"; exon_number "1"; gene_name "BPL1"; gene_source "ensembl"; gene_biotype "protein_coding"; transcript_name "BPL1"; transcript_source "ensembl"; transcript_biotype "protein_coding";
IV	ensembl	stop_codon	205109	205111	.	+	0	gene_id "YDL141W"; transcript_id "YDL141W"; exon_number "1"; gene_name "BPL1"; gene_source "ensembl"; gene_biotype "protein_coding"; transcript_name "BPL1"; transcript_source "ensembl"; transcript_biotype "protein_coding";
IV	ensembl	gene	205360	210561	.	-	.	gene_id "YDL140C"; gene_name "RPO21"; gene_source "ensembl"; gene_biotype "protein_coding";
IV	ensembl	transcript	205360	210561	.	-	.	gene_id "YDL140C"; transcript_id "YDL140C"; gene_name "RPO21"; gene_source "ensembl"; gene_biotype "protein_coding"; transcript_name "RPO21"; transcript_source "ensembl"; transcript_biotype "protein_coding";
IV	ensembl	exon	205360	210561	.	-	.	gene_id "YDL140C"; transcript_id "YDL140C"; exon_number "1"; gene_name "RPO21"; gene_source "ensembl"; gene_biotype "protein_coding"; transcript_name "RPO21"; transcript_source "ensembl"; transcript_biotype "protein_coding"; exon_id "YDL140C.1";
IV	ensembl	CDS	205363	210561	.	-	0	gene_id "YDL140C"; transcript_id "YDL140C"; exon_number "1"; gene_name "RPO21"; gene_source "ensembl"; gene_biotype "protein_coding"; transcript_name "RPO21"; transcript_source "ensembl"; transcript_biotype "protein_coding"; protein_id "YDL140C";
IV	ensembl	start_codon	210559	210561	.	-	0	gene_id "YDL140C"; transcript_id "YDL140C"; exon_number "1"; gene_name "RPO21"; gene_source "ensembl"; gene_biotype "protein_coding"; transcript_name "RPO21"; transcript_source "ensembl"; transcript_biotype "protein_coding";
IV	ensembl	stop_codon	205360	205362	.	-	0	gene_id "YDL140C"; transcript_id "YDL140C"; exon_number "1"; gene_name "RPO21"; gene_source "ensembl"; gene_biotype "protein_coding"; transcript_name "RPO21"; transcript_source "ensembl"; transcript_biotype "protein_coding";
IV	ensembl	gene	211375	212046	.	-	.	gene_id "YDL139C"; gene_name "SCM3"; gene_source "ensembl"; gene_biotype "protein_coding";
IV	ensembl	transcript	211375	212046	.	-	.	gene_id "YDL139C"; transcript_id "YDL139C"; gene_name "SCM3"; gene_source "ensembl"; gene_biotype "protein_coding"; transcript_name "SCM3"; transcript_source "ensembl"; transcript_biotype "protein_coding";
IV	ensembl	exon	211375	212046	.	-	.	gene_id "YDL139C"; transcript_id "YDL139C"; exon_number "1"; gene_name "SCM3"; gene_source "ensembl"; gene_biotype "protein_coding"; transcript_name "SCM3"; transcript_source "ensembl"; transcript_biotype "protein_coding"; exon_id "YDL139C.1";
IV	ensembl	CDS	211378	212046	.	-	0	gene_id "YDL139C"; transcript_id "YDL139C"; exon_number "1"; gene_name "SCM3"; gene_source "ensembl"; gene_biotype "protein_coding"; transcript_name "SCM3"; transcript_source "ensembl"; transcript_biotype "protein_coding"; protein_id "YDL139C";
IV	ensembl	start_codon	212044	212046	.	-	0	gene_id "YDL139C"; transcript_id "YDL139C"; exon_number "1"; gene_name "SCM3"; gene_source "ensembl"; gene_biotype "protein_coding"; transcript_name "SCM3"; transcript_source "ensembl"; transcript_biotype "protein_coding";
IV	ensembl	stop_codon	211375	211377	.	-	0	gene_id "YDL139C"; transcript_id "YDL139C"; exon_number "1"; gene_name "SCM3"; gene_source "ensembl"; gene_biotype "protein_coding"; transcript_name "SCM3"; transcript_source "ensembl"; transcript_biotype "protein_coding";
IV	ensembl	gene	213351	215642	.	+	.	gene_id "YDL138W"; gene_name "RGT2"; gene_source "ensembl"; gene_biotype "protein_coding";
IV	ensembl	transcript	213351	215642	.	+	.	gene_id "YDL138W"; transcript_id "YDL138W"; gene_name "RGT2"; gene_source "ensembl"; gene_biotype "protein_coding"; transcript_name "RGT2"; transcript_source "ensembl"; transcript_biotype "protein_coding";
IV	ensembl	exon	213351	215642	.	+	.	gene_id "YDL138W"; transcript_id "YDL138W"; exon_number "1"; gene_name "RGT2"; gene_source "ensembl"; gene_biotype "protein_coding"; transcript_name "RGT2"; transcript_source "ensembl"; transcript_biotype "protein_coding"; exon_id "YDL138W.1";
IV	ensembl	CDS	213351	215639	.	+	0	gene_id "YDL138W"; transcript_id "YDL138W"; exon_number "1"; gene_name "RGT2"; gene_source "ensembl"; gene_biotype "protein_coding"; transcript_name "RGT2"; transcript_source "ensembl"; transcript_biotype "protein_coding"; protein_id "YDL138W";
IV	ensembl	start_codon	213351	213353	.	+	0	gene_id "YDL138W"; transcript_id "YDL138W"; exon_number "1"; gene_name "RGT2"; gene_source "ensembl"; gene_biotype "protein_coding"; transcript_name "RGT2"; transcript_source "ensembl"; transcript_biotype "protein_coding";
IV	ensembl	stop_codon	215640	215642	.	+	0	gene_id "YDL138W"; transcript_id "YDL138W"; exon_number "1"; gene_name "RGT2"; gene_source "ensembl"; gene_biotype "protein_coding"; transcript_name "RGT2"; transcript_source "ensembl"; transcript_biotype "protein_coding";
IV	ensembl	gene	216529	217074	.	+	.	gene_id "YDL137W"; gene_name "ARF2"; gene_source "ensembl"; gene_biotype "protein_coding";
IV	ensembl	transcript	216529	217074	.	+	.	gene_id "YDL137W"; transcript_id "YDL137W"; gene_name "ARF2"; gene_source "ensembl"; gene_biotype "protein_coding"; transcript_name "ARF2"; transcript_source "ensembl"; transcript_biotype "protein_coding";
IV	ensembl	exon	216529	217074	.	+	.	gene_id "YDL137W"; transcript_id "YDL137W"; exon_number "1"; gene_name "ARF2"; gene_source "ensembl"; gene_biotype "protein_coding"; transcript_name "ARF2"; transcript_source "ensembl"; transcript_biotype "protein_coding"; exon_id "YDL137W.1";
IV	ensembl	CDS	216529	217071	.	+	0	gene_id "YDL137W"; transcript_id "YDL137W"; exon_number "1"; gene_name "ARF2"; gene_source "ensembl"; gene_biotype "protein_coding"; transcript_name "ARF2"; transcript_source "ensembl"; transcript_biotype "protein_coding"; protein_id "YDL137W";
IV	ensembl	start_codon	216529	216531	.	+	0	gene_id "YDL137W"; transcript_id "YDL137W"; exon_number "1"; gene_name "ARF2"; gene_source "ensembl"; gene_biotype "protein_coding"; transcript_name "ARF2"; transcript_source "ensembl"; transcript_biotype "protein_coding";
IV	ensembl	stop_codon	217072	217074	.	+	0	gene_id "YDL137W"; transcript_id "YDL137W"; exon_number "1"; gene_name "ARF2"; gene_source "ensembl"; gene_biotype "protein_coding"; transcript_name "ARF2"; transcript_source "ensembl"; transcript_biotype "protein_coding";
IV	ensembl	gene	217600	218367	.	+	.	gene_id "YDL136W"; gene_name "RPL35B"; gene_source "ensembl"; gene_biotype "protein_coding";
IV	ensembl	transcript	217600	218367	.	+	.	gene_id "YDL136W"; transcript_id "YDL136W"; gene_name "RPL35B"; gene_source "ensembl"; gene_biotype "protein_coding"; transcript_name "RPL35B"; transcript_source "ensembl"; transcript_biotype "protein_coding";
IV	ensembl	exon	217600	217602	.	+	.	gene_id "YDL136W"; transcript_id "YDL136W"; exon_number "1"; gene_name "RPL35B"; gene_source "ensembl"; gene_biotype "protein_coding"; transcript_name "RPL35B"; transcript_source "ensembl"; transcript_biotype "protein_coding"; exon_id "YDL136W.1";
IV	ensembl	CDS	217600	217602	.	+	0	gene_id "YDL136W"; transcript_id "YDL136W"; exon_number "1"; gene_name "RPL35B"; gene_source "ensembl"; gene_biotype "protein_coding"; transcript_name "RPL35B"; transcript_source "ensembl"; transcript_biotype "protein_coding"; protein_id "YDL136W";
IV	ensembl	start_codon	217600	217602	.	+	0	gene_id "YDL136W"; transcript_id "YDL136W"; exon_number "1"; gene_name "RPL35B"; gene_source "ensembl"; gene_biotype "protein_coding"; transcript_name "RPL35B"; transcript_source "ensembl"; transcript_biotype "protein_coding";
IV	ensembl	exon	218008	218367	.	+	.	gene_id "YDL136W"; transcript_id "YDL136W"; exon_number "2"; gene_name "RPL35B"; gene_source "ensembl"; gene_biotype "protein_coding"; transcript_name "RPL35B"; transcript_source "ensembl"; transcript_biotype "protein_coding"; exon_id "YDL136W.2";
IV	ensembl	CDS	218008	218364	.	+	0	gene_id "YDL136W"; transcript_id "YDL136W"; exon_number "2"; gene_name "RPL35B"; gene_source "ensembl"; gene_biotype "protein_coding"; transcript_name "RPL35B"; transcript_source "ensembl"; transcript_biotype "protein_coding"; protein_id "YDL136W";
IV	ensembl	stop_codon	218365	218367	.	+	0	gene_id "YDL136W"; transcript_id "YDL136W"; exon_number "2"; gene_name "RPL35B"; gene_source "ensembl"; gene_biotype "protein_coding"; transcript_name "RPL35B"; transcript_source "ensembl"; transcript_biotype "protein_coding";
IV	ensembl	gene	218680	219288	.	-	.	gene_id "YDL135C"; gene_name "RDI1"; gene_source "ensembl"; gene_biotype "protein_coding";
IV	ensembl	transcript	218680	219288	.	-	.	gene_id "YDL135C"; transcript_id "YDL135C"; gene_name "RDI1"; gene_source "ensembl"; gene_biotype "protein_coding"; transcript_name "RDI1"; transcript_source "ensembl"; transcript_biotype "protein_coding";
IV	ensembl	exon	218680	219288	.	-	.	gene_id "YDL135C"; transcript_id "YDL135C"; exon_number "1"; gene_name "RDI1"; gene_source "ensembl"; gene_biotype "protein_coding"; transcript_name "RDI1"; transcript_source "ensembl"; transcript_biotype "protein_coding"; exon_id "YDL135C.1";
IV	ensembl	CDS	218683	219288	.	-	0	gene_id "YDL135C"; transcript_id "YDL135C"; exon_number "1"; gene_name "RDI1"; gene_source "ensembl"; gene_biotype "protein_coding"; transcript_name "RDI1"; transcript_source "ensembl"; transcript_biotype "protein_coding"; protein_id "YDL135C";
IV	ensembl	start_codon	219286	219288	.	-	0	gene_id "YDL135C"; transcript_id "YDL135C"; exon_number "1"; gene_name "RDI1"; gene_source "ensembl"; gene_biotype "protein_coding"; transcript_name "RDI1"; transcript_source "ensembl"; transcript_biotype "protein_coding";
IV	ensembl	stop_codon	218680	218682	.	-	0	gene_id "YDL135C"; transcript_id "YDL135C"; exon_number "1"; gene_name "RDI1"; gene_source "ensembl"; gene_biotype "protein_coding"; transcript_name "RDI1"; transcript_source "ensembl"; transcript_biotype "protein_coding";
IV	ensembl	gene	219662	220771	.	-	.	gene_id "YDL134C"; gene_name "PPH21"; gene_source "ensembl"; gene_biotype "protein_coding";
IV	ensembl	transcript	219662	220771	.	-	.	gene_id "YDL134C"; transcript_id "YDL134C"; gene_name "PPH21"; gene_source "ensembl"; gene_biotype "protein_coding"; transcript_name "PPH21"; transcript_source "ensembl"; transcript_biotype "protein_coding";
IV	ensembl	exon	219662	220771	.	-	.	gene_id "YDL134C"; transcript_id "YDL134C"; exon_number "1"; gene_name "PPH21"; gene_source "ensembl"; gene_biotype "protein_coding"; transcript_name "PPH21"; transcript_source "ensembl"; transcript_biotype "protein_coding"; exon_id "YDL134C.1";
IV	ensembl	CDS	219665	220771	.	-	0	gene_id "YDL134C"; transcript_id "YDL134C"; exon_number "1"; gene_name "PPH21"; gene_source "ensembl"; gene_biotype "protein_coding"; transcript_name "PPH21"; transcript_source "ensembl"; transcript_biotype "protein_coding"; protein_id "YDL134C";
IV	ensembl	start_codon	220769	220771	.	-	0	gene_id "YDL134C"; transcript_id "YDL134C"; exon_number "1"; gene_name "PPH21"; gene_source "ensembl"; gene_biotype "protein_coding"; transcript_name "PPH21"; transcript_source "ensembl"; transcript_biotype "protein_coding";
IV	ensembl	stop_codon	219662	219664	.	-	0	gene_id "YDL134C"; transcript_id "YDL134C"; exon_number "1"; gene_name "PPH21"; gene_source "ensembl"; gene_biotype "protein_coding"; transcript_name "PPH21"; transcript_source "ensembl"; transcript_biotype "protein_coding";
IV	ensembl	gene	221724	221801	.	-	.	gene_id "YDL133C-A"; gene_name "RPL41B"; gene_source "ensembl"; gene_biotype "protein_coding";
IV	ensembl	transcript	221724	221801	.	-	.	gene_id "YDL133C-A"; transcript_id "YDL133C-A"; gene_name "RPL41B"; gene_source "ensembl"; gene_biotype "protein_coding"; transcript_name "RPL41B"; transcript_source "ensembl"; transcript_biotype "protein_coding";
IV	ensembl	exon	221724	221801	.	-	.	gene_id "YDL133C-A"; transcript_id "YDL133C-A"; exon_number "1"; gene_name "RPL41B"; gene_source "ensembl"; gene_biotype "protein_coding"; transcript_name "RPL41B"; transcript_source "ensembl"; transcript_biotype "protein_coding"; exon_id "YDL133C-A.1";
IV	ensembl	CDS	221727	221801	.	-	0	gene_id "YDL133C-A"; transcript_id "YDL133C-A"; exon_number "1"; gene_name "RPL41B"; gene_source "ensembl"; gene_biotype "protein_coding"; transcript_name "RPL41B"; transcript_source "ensembl"; transcript_biotype "protein_coding"; protein_id "YDL133C-A";
IV	ensembl	start_codon	221799	221801	.	-	0	gene_id "YDL133C-A"; transcript_id "YDL133C-A"; exon_number "1"; gene_name "RPL41B"; gene_source "ensembl"; gene_biotype "protein_coding"; transcript_name "RPL41B"; transcript_source "ensembl"; transcript_biotype "protein_coding";
IV	ensembl	stop_codon	221724	221726	.	-	0	gene_id "YDL133C-A"; transcript_id "YDL133C-A"; exon_number "1"; gene_name "RPL41B"; gene_source "ensembl"; gene_biotype "protein_coding"; transcript_name "RPL41B"; transcript_source "ensembl"; transcript_biotype "protein_coding";
IV	ensembl	gene	222427	223740	.	+	.	gene_id "YDL133W"; gene_name "SRF1"; gene_source "ensembl"; gene_biotype "protein_coding";
IV	ensembl	transcript	222427	223740	.	+	.	gene_id "YDL133W"; transcript_id "YDL133W"; gene_name "SRF1"; gene_source "ensembl"; gene_biotype "protein_coding"; transcript_name "SRF1"; transcript_source "ensembl"; transcript_biotype "protein_coding";
IV	ensembl	exon	222427	223740	.	+	.	gene_id "YDL133W"; transcript_id "YDL133W"; exon_number "1"; gene_name "SRF1"; gene_source "ensembl"; gene_biotype "protein_coding"; transcript_name "SRF1"; transcript_source "ensembl"; transcript_biotype "protein_coding"; exon_id "YDL133W.1";
IV	ensembl	CDS	222427	223737	.	+	0	gene_id "YDL133W"; transcript_id "YDL133W"; exon_number "1"; gene_name "SRF1"; gene_source "ensembl"; gene_biotype "protein_coding"; transcript_name "SRF1"; transcript_source "ensembl"; transcript_biotype "protein_coding"; protein_id "YDL133W";
IV	ensembl	start_codon	222427	222429	.	+	0	gene_id "YDL133W"; transcript_id "YDL133W"; exon_number "1"; gene_name "SRF1"; gene_source "ensembl"; gene_biotype "protein_coding"; transcript_name "SRF1"; transcript_source "ensembl"; transcript_biotype "protein_coding";
IV	ensembl	stop_codon	223738	223740	.	+	0	gene_id "YDL133W"; transcript_id "YDL133W"; exon_number "1"; gene_name "SRF1"; gene_source "ensembl"; gene_biotype "protein_coding"; transcript_name "SRF1"; transcript_source "ensembl"; transcript_biotype "protein_coding";
IV	ensembl	gene	224304	226751	.	+	.	gene_id "YDL132W"; gene_name "CDC53"; gene_source "ensembl"; gene_biotype "protein_coding";
IV	ensembl	transcript	224304	226751	.	+	.	gene_id "YDL132W"; transcript_id "YDL132W"; gene_name "CDC53"; gene_source "ensembl"; gene_biotype "protein_coding"; transcript_name "CDC53"; transcript_source "ensembl"; transcript_biotype "protein_coding";
IV	ensembl	exon	224304	226751	.	+	.	gene_id "YDL132W"; transcript_id "YDL132W"; exon_number "1"; gene_name "CDC53"; gene_source "ensembl"; gene_biotype "protein_coding"; transcript_name "CDC53"; transcript_source "ensembl"; transcript_biotype "protein_coding"; exon_id "YDL132W.1";
IV	ensembl	CDS	224304	226748	.	+	0	gene_id "YDL132W"; transcript_id "YDL132W"; exon_number "1"; gene_name "CDC53"; gene_source "ensembl"; gene_biotype "protein_coding"; transcript_name "CDC53"; transcript_source "ensembl"; transcript_biotype "protein_coding"; protein_id "YDL132W";
IV	ensembl	start_codon	224304	224306	.	+	0	gene_id "YDL132W"; transcript_id "YDL132W"; exon_number "1"; gene_name "CDC53"; gene_source "ensembl"; gene_biotype "protein_coding"; transcript_name "CDC53"; transcript_source "ensembl"; transcript_biotype "protein_coding";
IV	ensembl	stop_codon	226749	226751	.	+	0	gene_id "YDL132W"; transcript_id "YDL132W"; exon_number "1"; gene_name "CDC53"; gene_source "ensembl"; gene_biotype "protein_coding"; transcript_name "CDC53"; transcript_source "ensembl"; transcript_biotype "protein_coding";
IV	ensembl	gene	227393	228715	.	+	.	gene_id "YDL131W"; gene_name "LYS21"; gene_source "ensembl"; gene_biotype "protein_coding";
IV	ensembl	transcript	227393	228715	.	+	.	gene_id "YDL131W"; transcript_id "YDL131W"; gene_name "LYS21"; gene_source "ensembl"; gene_biotype "protein_coding"; transcript_name "LYS21"; transcript_source "ensembl"; transcript_biotype "protein_coding";
IV	ensembl	exon	227393	228715	.	+	.	gene_id "YDL131W"; transcript_id "YDL131W"; exon_number "1"; gene_name "LYS21"; gene_source "ensembl"; gene_biotype "protein_coding"; transcript_name "LYS21"; transcript_source "ensembl"; transcript_biotype "protein_coding"; exon_id "YDL131W.1";
IV	ensembl	CDS	227393	228712	.	+	0	gene_id "YDL131W"; transcript_id "YDL131W"; exon_number "1"; gene_name "LYS21"; gene_source "ensembl"; gene_biotype "protein_coding"; transcript_name "LYS21"; transcript_source "ensembl"; transcript_biotype "protein_coding"; protein_id "YDL131W";
IV	ensembl	start_codon	227393	227395	.	+	0	gene_id "YDL131W"; transcript_id "YDL131W"; exon_number "1"; gene_name "LYS21"; gene_source "ensembl"; gene_biotype "protein_coding"; transcript_name "LYS21"; transcript_source "ensembl"; transcript_biotype "protein_coding";
IV	ensembl	stop_codon	228713	228715	.	+	0	gene_id "YDL131W"; transcript_id "YDL131W"; exon_number "1"; gene_name "LYS21"; gene_source "ensembl"; gene_biotype "protein_coding"; transcript_name "LYS21"; transcript_source "ensembl"; transcript_biotype "protein_coding";
IV	ensembl	gene	229171	229431	.	+	.	gene_id "YDL130W-A"; gene_name "STF1"; gene_source "ensembl"; gene_biotype "protein_coding";
IV	ensembl	transcript	229171	229431	.	+	.	gene_id "YDL130W-A"; transcript_id "YDL130W-A"; gene_name "STF1"; gene_source "ensembl"; gene_biotype "protein_coding"; transcript_name "STF1"; transcript_source "ensembl"; transcript_biotype "protein_coding";
IV	ensembl	exon	229171	229431	.	+	.	gene_id "YDL130W-A"; transcript_id "YDL130W-A"; exon_number "1"; gene_name "STF1"; gene_source "ensembl"; gene_biotype "protein_coding"; transcript_name "STF1"; transcript_source "ensembl"; transcript_biotype "protein_coding"; exon_id "YDL130W-A.1";
IV	ensembl	CDS	229171	229428	.	+	0	gene_id "YDL130W-A"; transcript_id "YDL130W-A"; exon_number "1"; gene_name "STF1"; gene_source "ensembl"; gene_biotype "protein_coding"; transcript_name "STF1"; transcript_source "ensembl"; transcript_biotype "protein_coding"; protein_id "YDL130W-A";
IV	ensembl	start_codon	229171	229173	.	+	0	gene_id "YDL130W-A"; transcript_id "YDL130W-A"; exon_number "1"; gene_name "STF1"; gene_source "ensembl"; gene_biotype "protein_coding"; transcript_name "STF1"; transcript_source "ensembl"; transcript_biotype "protein_coding";
IV	ensembl	stop_codon	229429	229431	.	+	0	gene_id "YDL130W-A"; transcript_id "YDL130W-A"; exon_number "1"; gene_name "STF1"; gene_source "ensembl"; gene_biotype "protein_coding"; transcript_name "STF1"; transcript_source "ensembl"; transcript_biotype "protein_coding";
IV	ensembl	gene	229906	230527	.	+	.	gene_id "YDL130W"; gene_name "RPP1B"; gene_source "ensembl"; gene_biotype "protein_coding";
IV	ensembl	transcript	229906	230527	.	+	.	gene_id "YDL130W"; transcript_id "YDL130W"; gene_name "RPP1B"; gene_source "ensembl"; gene_biotype "protein_coding"; transcript_name "RPP1B"; transcript_source "ensembl"; transcript_biotype "protein_coding";
IV	ensembl	exon	229906	230019	.	+	.	gene_id "YDL130W"; transcript_id "YDL130W"; exon_number "1"; gene_name "RPP1B"; gene_source "ensembl"; gene_biotype "protein_coding"; transcript_name "RPP1B"; transcript_source "ensembl"; transcript_biotype "protein_coding"; exon_id "YDL130W.1";
IV	ensembl	CDS	229906	230019	.	+	0	gene_id "YDL130W"; transcript_id "YDL130W"; exon_number "1"; gene_name "RPP1B"; gene_source "ensembl"; gene_biotype "protein_coding"; transcript_name "RPP1B"; transcript_source "ensembl"; transcript_biotype "protein_coding"; protein_id "YDL130W";
IV	ensembl	start_codon	229906	229908	.	+	0	gene_id "YDL130W"; transcript_id "YDL130W"; exon_number "1"; gene_name "RPP1B"; gene_source "ensembl"; gene_biotype "protein_coding"; transcript_name "RPP1B"; transcript_source "ensembl"; transcript_biotype "protein_coding";
IV	ensembl	exon	230321	230527	.	+	.	gene_id "YDL130W"; transcript_id "YDL130W"; exon_number "2"; gene_name "RPP1B"; gene_source "ensembl"; gene_biotype "protein_coding"; transcript_name "RPP1B"; transcript_source "ensembl"; transcript_biotype "protein_coding"; exon_id "YDL130W.2";
IV	ensembl	CDS	230321	230524	.	+	0	gene_id "YDL130W"; transcript_id "YDL130W"; exon_number "2"; gene_name "RPP1B"; gene_source "ensembl"; gene_biotype "protein_coding"; transcript_name "RPP1B"; transcript_source "ensembl"; transcript_biotype "protein_coding"; protein_id "YDL130W";
IV	ensembl	stop_codon	230525	230527	.	+	0	gene_id "YDL130W"; transcript_id "YDL130W"; exon_number "2"; gene_name "RPP1B"; gene_source "ensembl"; gene_biotype "protein_coding"; transcript_name "RPP1B"; transcript_source "ensembl"; transcript_biotype "protein_coding";
IV	ensembl	gene	231024	231899	.	+	.	gene_id "YDL129W"; gene_source "ensembl"; gene_biotype "protein_coding";
IV	ensembl	transcript	231024	231899	.	+	.	gene_id "YDL129W"; transcript_id "YDL129W"; gene_source "ensembl"; gene_biotype "protein_coding"; transcript_name "YDL129W"; transcript_source "ensembl"; transcript_biotype "protein_coding";
IV	ensembl	exon	231024	231899	.	+	.	gene_id "YDL129W"; transcript_id "YDL129W"; exon_number "1"; gene_source "ensembl"; gene_biotype "protein_coding"; transcript_name "YDL129W"; transcript_source "ensembl"; transcript_biotype "protein_coding"; exon_id "YDL129W.1";
IV	ensembl	CDS	231024	231896	.	+	0	gene_id "YDL129W"; transcript_id "YDL129W"; exon_number "1"; gene_source "ensembl"; gene_biotype "protein_coding"; transcript_name "YDL129W"; transcript_source "ensembl"; transcript_biotype "protein_coding"; protein_id "YDL129W";
IV	ensembl	start_codon	231024	231026	.	+	0	gene_id "YDL129W"; transcript_id "YDL129W"; exon_number "1"; gene_source "ensembl"; gene_biotype "protein_coding"; transcript_name "YDL129W"; transcript_source "ensembl"; transcript_biotype "protein_coding";
IV	ensembl	stop_codon	231897	231899	.	+	0	gene_id "YDL129W"; transcript_id "YDL129W"; exon_number "1"; gene_source "ensembl"; gene_biotype "protein_coding"; transcript_name "YDL129W"; transcript_source "ensembl"; transcript_biotype "protein_coding";
IV	ensembl	gene	232652	233887	.	+	.	gene_id "YDL128W"; gene_name "VCX1"; gene_source "ensembl"; gene_biotype "protein_coding";
IV	ensembl	transcript	232652	233887	.	+	.	gene_id "YDL128W"; transcript_id "YDL128W"; gene_name "VCX1"; gene_source "ensembl"; gene_biotype "protein_coding"; transcript_name "VCX1"; transcript_source "ensembl"; transcript_biotype "protein_coding";
IV	ensembl	exon	232652	233887	.	+	.	gene_id "YDL128W"; transcript_id "YDL128W"; exon_number "1"; gene_name "VCX1"; gene_source "ensembl"; gene_biotype "protein_coding"; transcript_name "VCX1"; transcript_source "ensembl"; transcript_biotype "protein_coding"; exon_id "YDL128W.1";
IV	ensembl	CDS	232652	233884	.	+	0	gene_id "YDL128W"; transcript_id "YDL128W"; exon_number "1"; gene_name "VCX1"; gene_source "ensembl"; gene_biotype "protein_coding"; transcript_name "VCX1"; transcript_source "ensembl"; transcript_biotype "protein_coding"; protein_id "YDL128W";
IV	ensembl	start_codon	232652	232654	.	+	0	gene_id "YDL128W"; transcript_id "YDL128W"; exon_number "1"; gene_name "VCX1"; gene_source "ensembl"; gene_biotype "protein_coding"; transcript_name "VCX1"; transcript_source "ensembl"; transcript_biotype "protein_coding";
IV	ensembl	stop_codon	233885	233887	.	+	0	gene_id "YDL128W"; transcript_id "YDL128W"; exon_number "1"; gene_name "VCX1"; gene_source "ensembl"; gene_biotype "protein_coding"; transcript_name "VCX1"; transcript_source "ensembl"; transcript_biotype "protein_coding";
IV	ensembl	gene	234927	235853	.	+	.	gene_id "YDL127W"; gene_name "PCL2"; gene_source "ensembl"; gene_biotype "protein_coding";
IV	ensembl	transcript	234927	235853	.	+	.	gene_id "YDL127W"; transcript_id "YDL127W"; gene_name "PCL2"; gene_source "ensembl"; gene_biotype "protein_coding"; transcript_name "PCL2"; transcript_source "ensembl"; transcript_biotype "protein_coding";
IV	ensembl	exon	234927	235853	.	+	.	gene_id "YDL127W"; transcript_id "YDL127W"; exon_number "1"; gene_name "PCL2"; gene_source "ensembl"; gene_biotype "protein_coding"; transcript_name "PCL2"; transcript_source "ensembl"; transcript_biotype "protein_coding"; exon_id "YDL127W.1";
IV	ensembl	CDS	234927	235850	.	+	0	gene_id "YDL127W"; transcript_id "YDL127W"; exon_number "1"; gene_name "PCL2"; gene_source "ensembl"; gene_biotype "protein_coding"; transcript_name "PCL2"; transcript_source "ensembl"; transcript_biotype "protein_coding"; protein_id "YDL127W";
IV	ensembl	start_codon	234927	234929	.	+	0	gene_id "YDL127W"; transcript_id "YDL127W"; exon_number "1"; gene_name "PCL2"; gene_source "ensembl"; gene_biotype "protein_coding"; transcript_name "PCL2"; transcript_source "ensembl"; transcript_biotype "protein_coding";
IV	ensembl	stop_codon	235851	235853	.	+	0	gene_id "YDL127W"; transcript_id "YDL127W"; exon_number "1"; gene_name "PCL2"; gene_source "ensembl"; gene_biotype "protein_coding"; transcript_name "PCL2"; transcript_source "ensembl"; transcript_biotype "protein_coding";
IV	ensembl	gene	236157	238664	.	-	.	gene_id "YDL126C"; gene_name "CDC48"; gene_source "ensembl"; gene_biotype "protein_coding";
IV	ensembl	transcript	236157	238664	.	-	.	gene_id "YDL126C"; transcript_id "YDL126C"; gene_name "CDC48"; gene_source "ensembl"; gene_biotype "protein_coding"; transcript_name "CDC48"; transcript_source "ensembl"; transcript_biotype "protein_coding";
IV	ensembl	exon	236157	238664	.	-	.	gene_id "YDL126C"; transcript_id "YDL126C"; exon_number "1"; gene_name "CDC48"; gene_source "ensembl"; gene_biotype "protein_coding"; transcript_name "CDC48"; transcript_source "ensembl"; transcript_biotype "protein_coding"; exon_id "YDL126C.1";
IV	ensembl	CDS	236160	238664	.	-	0	gene_id "YDL126C"; transcript_id "YDL126C"; exon_number "1"; gene_name "CDC48"; gene_source "ensembl"; gene_biotype "protein_coding"; transcript_name "CDC48"; transcript_source "ensembl"; transcript_biotype "protein_coding"; protein_id "YDL126C";
IV	ensembl	start_codon	238662	238664	.	-	0	gene_id "YDL126C"; transcript_id "YDL126C"; exon_number "1"; gene_name "CDC48"; gene_source "ensembl"; gene_biotype "protein_coding"; transcript_name "CDC48"; transcript_source "ensembl"; transcript_biotype "protein_coding";
IV	ensembl	stop_codon	236157	236159	.	-	0	gene_id "YDL126C"; transcript_id "YDL126C"; exon_number "1"; gene_name "CDC48"; gene_source "ensembl"; gene_biotype "protein_coding"; transcript_name "CDC48"; transcript_source "ensembl"; transcript_biotype "protein_coding";
IV	ensembl	gene	239019	239606	.	-	.	gene_id "YDL125C"; gene_name "HNT1"; gene_source "ensembl"; gene_biotype "protein_coding";
IV	ensembl	transcript	239019	239606	.	-	.	gene_id "YDL125C"; transcript_id "YDL125C"; gene_name "HNT1"; gene_source "ensembl"; gene_biotype "protein_coding"; transcript_name "HNT1"; transcript_source "ensembl"; transcript_biotype "protein_coding";
IV	ensembl	exon	239510	239606	.	-	.	gene_id "YDL125C"; transcript_id "YDL125C"; exon_number "1"; gene_name "HNT1"; gene_source "ensembl"; gene_biotype "protein_coding"; transcript_name "HNT1"; transcript_source "ensembl"; transcript_biotype "protein_coding"; exon_id "YDL125C.1";
IV	ensembl	CDS	239510	239606	.	-	0	gene_id "YDL125C"; transcript_id "YDL125C"; exon_number "1"; gene_name "HNT1"; gene_source "ensembl"; gene_biotype "protein_coding"; transcript_name "HNT1"; transcript_source "ensembl"; transcript_biotype "protein_coding"; protein_id "YDL125C";
IV	ensembl	start_codon	239604	239606	.	-	0	gene_id "YDL125C"; transcript_id "YDL125C"; exon_number "1"; gene_name "HNT1"; gene_source "ensembl"; gene_biotype "protein_coding"; transcript_name "HNT1"; transcript_source "ensembl"; transcript_biotype "protein_coding";
IV	ensembl	exon	239019	239398	.	-	.	gene_id "YDL125C"; transcript_id "YDL125C"; exon_number "2"; gene_name "HNT1"; gene_source "ensembl"; gene_biotype "protein_coding"; transcript_name "HNT1"; transcript_source "ensembl"; transcript_biotype "protein_coding"; exon_id "YDL125C.2";
IV	ensembl	CDS	239019	239398	.	-	1	gene_id "YDL125C"; transcript_id "YDL125C"; exon_number "2"; gene_name "HNT1"; gene_source "ensembl"; gene_biotype "protein_coding"; transcript_name "HNT1"; transcript_source "ensembl"; transcript_biotype "protein_coding"; protein_id "YDL125C";
IV	ensembl	gene	240259	241197	.	+	.	gene_id "YDL124W"; gene_source "ensembl"; gene_biotype "protein_coding";
IV	ensembl	transcript	240259	241197	.	+	.	gene_id "YDL124W"; transcript_id "YDL124W"; gene_source "ensembl"; gene_biotype "protein_coding"; transcript_name "YDL124W"; transcript_source "ensembl"; transcript_biotype "protein_coding";
IV	ensembl	exon	240259	241197	.	+	.	gene_id "YDL124W"; transcript_id "YDL124W"; exon_number "1"; gene_source "ensembl"; gene_biotype "protein_coding"; transcript_name "YDL124W"; transcript_source "ensembl"; transcript_biotype "protein_coding"; exon_id "YDL124W.1";
IV	ensembl	CDS	240259	241194	.	+	0	gene_id "YDL124W"; transcript_id "YDL124W"; exon_number "1"; gene_source "ensembl"; gene_biotype "protein_coding"; transcript_name "YDL124W"; transcript_source "ensembl"; transcript_biotype "protein_coding"; protein_id "YDL124W";
IV	ensembl	start_codon	240259	240261	.	+	0	gene_id "YDL124W"; transcript_id "YDL124W"; exon_number "1"; gene_source "ensembl"; gene_biotype "protein_coding"; transcript_name "YDL124W"; transcript_source "ensembl"; transcript_biotype "protein_coding";
IV	ensembl	stop_codon	241195	241197	.	+	0	gene_id "YDL124W"; transcript_id "YDL124W"; exon_number "1"; gene_source "ensembl"; gene_biotype "protein_coding"; transcript_name "YDL124W"; transcript_source "ensembl"; transcript_biotype "protein_coding";
IV	ensembl	gene	241418	241840	.	+	.	gene_id "YDL123W"; gene_name "SNA4"; gene_source "ensembl"; gene_biotype "protein_coding";
IV	ensembl	transcript	241418	241840	.	+	.	gene_id "YDL123W"; transcript_id "YDL123W"; gene_name "SNA4"; gene_source "ensembl"; gene_biotype "protein_coding"; transcript_name "SNA4"; transcript_source "ensembl"; transcript_biotype "protein_coding";
IV	ensembl	exon	241418	241840	.	+	.	gene_id "YDL123W"; transcript_id "YDL123W"; exon_number "1"; gene_name "SNA4"; gene_source "ensembl"; gene_biotype "protein_coding"; transcript_name "SNA4"; transcript_source "ensembl"; transcript_biotype "protein_coding"; exon_id "YDL123W.1";
IV	ensembl	CDS	241418	241837	.	+	0	gene_id "YDL123W"; transcript_id "YDL123W"; exon_number "1"; gene_name "SNA4"; gene_source "ensembl"; gene_biotype "protein_coding"; transcript_name "SNA4"; transcript_source "ensembl"; transcript_biotype "protein_coding"; protein_id "YDL123W";
IV	ensembl	start_codon	241418	241420	.	+	0	gene_id "YDL123W"; transcript_id "YDL123W"; exon_number "1"; gene_name "SNA4"; gene_source "ensembl"; gene_biotype "protein_coding"; transcript_name "SNA4"; transcript_source "ensembl"; transcript_biotype "protein_coding";
IV	ensembl	stop_codon	241838	241840	.	+	0	gene_id "YDL123W"; transcript_id "YDL123W"; exon_number "1"; gene_name "SNA4"; gene_source "ensembl"; gene_biotype "protein_coding"; transcript_name "SNA4"; transcript_source "ensembl"; transcript_biotype "protein_coding";
IV	ensembl	gene	242552	244981	.	+	.	gene_id "YDL122W"; gene_name "UBP1"; gene_source "ensembl"; gene_biotype "protein_coding";
IV	ensembl	transcript	242552	244981	.	+	.	gene_id "YDL122W"; transcript_id "YDL122W"; gene_name "UBP1"; gene_source "ensembl"; gene_biotype "protein_coding"; transcript_name "UBP1"; transcript_source "ensembl"; transcript_biotype "protein_coding";
IV	ensembl	exon	242552	244981	.	+	.	gene_id "YDL122W"; transcript_id "YDL122W"; exon_number "1"; gene_name "UBP1"; gene_source "ensembl"; gene_biotype "protein_coding"; transcript_name "UBP1"; transcript_source "ensembl"; transcript_biotype "protein_coding"; exon_id "YDL122W.1";
IV	ensembl	CDS	242552	244978	.	+	0	gene_id "YDL122W"; transcript_id "YDL122W"; exon_number "1"; gene_name "UBP1"; gene_source "ensembl"; gene_biotype "protein_coding"; transcript_name "UBP1"; transcript_source "ensembl"; transcript_biotype "protein_coding"; protein_id "YDL122W";
IV	ensembl	start_codon	242552	242554	.	+	0	gene_id "YDL122W"; transcript_id "YDL122W"; exon_number "1"; gene_name "UBP1"; gene_source "ensembl"; gene_biotype "protein_coding"; transcript_name "UBP1"; transcript_source "ensembl"; transcript_biotype "protein_coding";
IV	ensembl	stop_codon	244979	244981	.	+	0	gene_id "YDL122W"; transcript_id "YDL122W"; exon_number "1"; gene_name "UBP1"; gene_source "ensembl"; gene_biotype "protein_coding"; transcript_name "UBP1"; transcript_source "ensembl"; transcript_biotype "protein_coding";
IV	ensembl	gene	245133	245582	.	-	.	gene_id "YDL121C"; gene_source "ensembl"; gene_biotype "protein_coding";
IV	ensembl	transcript	245133	245582	.	-	.	gene_id "YDL121C"; transcript_id "YDL121C"; gene_source "ensembl"; gene_biotype "protein_coding"; transcript_name "YDL121C"; transcript_source "ensembl"; transcript_biotype "protein_coding";
IV	ensembl	exon	245133	245582	.	-	.	gene_id "YDL121C"; transcript_id "YDL121C"; exon_number "1"; gene_source "ensembl"; gene_biotype "protein_coding"; transcript_name "YDL121C"; transcript_source "ensembl"; transcript_biotype "protein_coding"; exon_id "YDL121C.1";
IV	ensembl	CDS	245136	245582	.	-	0	gene_id "YDL121C"; transcript_id "YDL121C"; exon_number "1"; gene_source "ensembl"; gene_biotype "protein_coding"; transcript_name "YDL121C"; transcript_source "ensembl"; transcript_biotype "protein_coding"; protein_id "YDL121C";
IV	ensembl	start_codon	245580	245582	.	-	0	gene_id "YDL121C"; transcript_id "YDL121C"; exon_number "1"; gene_source "ensembl"; gene_biotype "protein_coding"; transcript_name "YDL121C"; transcript_source "ensembl"; transcript_biotype "protein_coding";
IV	ensembl	stop_codon	245133	245135	.	-	0	gene_id "YDL121C"; transcript_id "YDL121C"; exon_number "1"; gene_source "ensembl"; gene_biotype "protein_coding"; transcript_name "YDL121C"; transcript_source "ensembl"; transcript_biotype "protein_coding";
IV	ensembl	gene	245923	246447	.	+	.	gene_id "YDL120W"; gene_name "YFH1"; gene_source "ensembl"; gene_biotype "protein_coding";
IV	ensembl	transcript	245923	246447	.	+	.	gene_id "YDL120W"; transcript_id "YDL120W"; gene_name "YFH1"; gene_source "ensembl"; gene_biotype "protein_coding"; transcript_name "YFH1"; transcript_source "ensembl"; transcript_biotype "protein_coding";
IV	ensembl	exon	245923	246447	.	+	.	gene_id "YDL120W"; transcript_id "YDL120W"; exon_number "1"; gene_name "YFH1"; gene_source "ensembl"; gene_biotype "protein_coding"; transcript_name "YFH1"; transcript_source "ensembl"; transcript_biotype "protein_coding"; exon_id "YDL120W.1";
IV	ensembl	CDS	245923	246444	.	+	0	gene_id "YDL120W"; transcript_id "YDL120W"; exon_number "1"; gene_name "YFH1"; gene_source "ensembl"; gene_biotype "protein_coding"; transcript_name "YFH1"; transcript_source "ensembl"; transcript_biotype "protein_coding"; protein_id "YDL120W";
IV	ensembl	start_codon	245923	245925	.	+	0	gene_id "YDL120W"; transcript_id "YDL120W"; exon_number "1"; gene_name "YFH1"; gene_source "ensembl"; gene_biotype "protein_coding"; transcript_name "YFH1"; transcript_source "ensembl"; transcript_biotype "protein_coding";
IV	ensembl	stop_codon	246445	246447	.	+	0	gene_id "YDL120W"; transcript_id "YDL120W"; exon_number "1"; gene_name "YFH1"; gene_source "ensembl"; gene_biotype "protein_coding"; transcript_name "YFH1"; transcript_source "ensembl"; transcript_biotype "protein_coding";
IV	ensembl	gene	246689	247612	.	-	.	gene_id "YDL119C"; gene_source "ensembl"; gene_biotype "protein_coding";
IV	ensembl	transcript	246689	247612	.	-	.	gene_id "YDL119C"; transcript_id "YDL119C"; gene_source "ensembl"; gene_biotype "protein_coding"; transcript_name "YDL119C"; transcript_source "ensembl"; transcript_biotype "protein_coding";
IV	ensembl	exon	246689	247612	.	-	.	gene_id "YDL119C"; transcript_id "YDL119C"; exon_number "1"; gene_source "ensembl"; gene_biotype "protein_coding"; transcript_name "YDL119C"; transcript_source "ensembl"; transcript_biotype "protein_coding"; exon_id "YDL119C.1";
IV	ensembl	CDS	246692	247612	.	-	0	gene_id "YDL119C"; transcript_id "YDL119C"; exon_number "1"; gene_source "ensembl"; gene_biotype "protein_coding"; transcript_name "YDL119C"; transcript_source "ensembl"; transcript_biotype "protein_coding"; protein_id "YDL119C";
IV	ensembl	start_codon	247610	247612	.	-	0	gene_id "YDL119C"; transcript_id "YDL119C"; exon_number "1"; gene_source "ensembl"; gene_biotype "protein_coding"; transcript_name "YDL119C"; transcript_source "ensembl"; transcript_biotype "protein_coding";
IV	ensembl	stop_codon	246689	246691	.	-	0	gene_id "YDL119C"; transcript_id "YDL119C"; exon_number "1"; gene_source "ensembl"; gene_biotype "protein_coding"; transcript_name "YDL119C"; transcript_source "ensembl"; transcript_biotype "protein_coding";
IV	ensembl	gene	247302	247682	.	+	.	gene_id "YDL118W"; gene_source "ensembl"; gene_biotype "protein_coding";
IV	ensembl	transcript	247302	247682	.	+	.	gene_id "YDL118W"; transcript_id "YDL118W"; gene_source "ensembl"; gene_biotype "protein_coding"; transcript_name "YDL118W"; transcript_source "ensembl"; transcript_biotype "protein_coding";
IV	ensembl	exon	247302	247682	.	+	.	gene_id "YDL118W"; transcript_id "YDL118W"; exon_number "1"; gene_source "ensembl"; gene_biotype "protein_coding"; transcript_name "YDL118W"; transcript_source "ensembl"; transcript_biotype "protein_coding"; exon_id "YDL118W.1";
IV	ensembl	CDS	247302	247679	.	+	0	gene_id "YDL118W"; transcript_id "YDL118W"; exon_number "1"; gene_source "ensembl"; gene_biotype "protein_coding"; transcript_name "YDL118W"; transcript_source "ensembl"; transcript_biotype "protein_coding"; protein_id "YDL118W";
IV	ensembl	start_codon	247302	247304	.	+	0	gene_id "YDL118W"; transcript_id "YDL118W"; exon_number "1"; gene_source "ensembl"; gene_biotype "protein_coding"; transcript_name "YDL118W"; transcript_source "ensembl"; transcript_biotype "protein_coding";
IV	ensembl	stop_codon	247680	247682	.	+	0	gene_id "YDL118W"; transcript_id "YDL118W"; exon_number "1"; gene_source "ensembl"; gene_biotype "protein_coding"; transcript_name "YDL118W"; transcript_source "ensembl"; transcript_biotype "protein_coding";
IV	ensembl	gene	248581	251238	.	+	.	gene_id "YDL117W"; gene_name "CYK3"; gene_source "ensembl"; gene_biotype "protein_coding";
IV	ensembl	transcript	248581	251238	.	+	.	gene_id "YDL117W"; transcript_id "YDL117W"; gene_name "CYK3"; gene_source "ensembl"; gene_biotype "protein_coding"; transcript_name "CYK3"; transcript_source "ensembl"; transcript_biotype "protein_coding";
IV	ensembl	exon	248581	251238	.	+	.	gene_id "YDL117W"; transcript_id "YDL117W"; exon_number "1"; gene_name "CYK3"; gene_source "ensembl"; gene_biotype "protein_coding"; transcript_name "CYK3"; transcript_source "ensembl"; transcript_biotype "protein_coding"; exon_id "YDL117W.1";
IV	ensembl	CDS	248581	251235	.	+	0	gene_id "YDL117W"; transcript_id "YDL117W"; exon_number "1"; gene_name "CYK3"; gene_source "ensembl"; gene_biotype "protein_coding"; transcript_name "CYK3"; transcript_source "ensembl"; transcript_biotype "protein_coding"; protein_id "YDL117W";
IV	ensembl	start_codon	248581	248583	.	+	0	gene_id "YDL117W"; transcript_id "YDL117W"; exon_number "1"; gene_name "CYK3"; gene_source "ensembl"; gene_biotype "protein_coding"; transcript_name "CYK3"; transcript_source "ensembl"; transcript_biotype "protein_coding";
IV	ensembl	stop_codon	251236	251238	.	+	0	gene_id "YDL117W"; transcript_id "YDL117W"; exon_number "1"; gene_name "CYK3"; gene_source "ensembl"; gene_biotype "protein_coding"; transcript_name "CYK3"; transcript_source "ensembl"; transcript_biotype "protein_coding";
IV	ensembl	gene	251566	253746	.	+	.	gene_id "YDL116W"; gene_name "NUP84"; gene_source "ensembl"; gene_biotype "protein_coding";
IV	ensembl	transcript	251566	253746	.	+	.	gene_id "YDL116W"; transcript_id "YDL116W"; gene_name "NUP84"; gene_source "ensembl"; gene_biotype "protein_coding"; transcript_name "NUP84"; transcript_source "ensembl"; transcript_biotype "protein_coding";
IV	ensembl	exon	251566	253746	.	+	.	gene_id "YDL116W"; transcript_id "YDL116W"; exon_number "1"; gene_name "NUP84"; gene_source "ensembl"; gene_biotype "protein_coding"; transcript_name "NUP84"; transcript_source "ensembl"; transcript_biotype "protein_coding"; exon_id "YDL116W.1";
IV	ensembl	CDS	251566	253743	.	+	0	gene_id "YDL116W"; transcript_id "YDL116W"; exon_number "1"; gene_name "NUP84"; gene_source "ensembl"; gene_biotype "protein_coding"; transcript_name "NUP84"; transcript_source "ensembl"; transcript_biotype "protein_coding"; protein_id "YDL116W";
IV	ensembl	start_codon	251566	251568	.	+	0	gene_id "YDL116W"; transcript_id "YDL116W"; exon_number "1"; gene_name "NUP84"; gene_source "ensembl"; gene_biotype "protein_coding"; transcript_name "NUP84"; transcript_source "ensembl"; transcript_biotype "protein_coding";
IV	ensembl	stop_codon	253744	253746	.	+	0	gene_id "YDL116W"; transcript_id "YDL116W"; exon_number "1"; gene_name "NUP84"; gene_source "ensembl"; gene_biotype "protein_coding"; transcript_name "NUP84"; transcript_source "ensembl"; transcript_biotype "protein_coding";
IV	ensembl	gene	253995	255126	.	-	.	gene_id "YDL115C"; gene_name "IWR1"; gene_source "ensembl"; gene_biotype "protein_coding";
IV	ensembl	transcript	253995	255126	.	-	.	gene_id "YDL115C"; transcript_id "YDL115C"; gene_name "IWR1"; gene_source "ensembl"; gene_biotype "protein_coding"; transcript_name "IWR1"; transcript_source "ensembl"; transcript_biotype "protein_coding";
IV	ensembl	exon	255045	255126	.	-	.	gene_id "YDL115C"; transcript_id "YDL115C"; exon_number "1"; gene_name "IWR1"; gene_source "ensembl"; gene_biotype "protein_coding"; transcript_name "IWR1"; transcript_source "ensembl"; transcript_biotype "protein_coding"; exon_id "YDL115C.1";
IV	ensembl	CDS	255045	255126	.	-	0	gene_id "YDL115C"; transcript_id "YDL115C"; exon_number "1"; gene_name "IWR1"; gene_source "ensembl"; gene_biotype "protein_coding"; transcript_name "IWR1"; transcript_source "ensembl"; transcript_biotype "protein_coding"; protein_id "YDL115C";
IV	ensembl	start_codon	255124	255126	.	-	0	gene_id "YDL115C"; transcript_id "YDL115C"; exon_number "1"; gene_name "IWR1"; gene_source "ensembl"; gene_biotype "protein_coding"; transcript_name "IWR1"; transcript_source "ensembl"; transcript_biotype "protein_coding";
IV	ensembl	exon	253995	254974	.	-	.	gene_id "YDL115C"; transcript_id "YDL115C"; exon_number "2"; gene_name "IWR1"; gene_source "ensembl"; gene_biotype "protein_coding"; transcript_name "IWR1"; transcript_source "ensembl"; transcript_biotype "protein_coding"; exon_id "YDL115C.2";
IV	ensembl	CDS	253995	254974	.	-	1	gene_id "YDL115C"; transcript_id "YDL115C"; exon_number "2"; gene_name "IWR1"; gene_source "ensembl"; gene_biotype "protein_coding"; transcript_name "IWR1"; transcript_source "ensembl"; transcript_biotype "protein_coding"; protein_id "YDL115C";
IV	ensembl	gene	254935	255048	.	+	.	gene_id "YDL114W-A"; gene_source "ensembl"; gene_biotype "protein_coding";
IV	ensembl	transcript	254935	255048	.	+	.	gene_id "YDL114W-A"; transcript_id "YDL114W-A"; gene_source "ensembl"; gene_biotype "protein_coding"; transcript_name "YDL114W-A"; transcript_source "ensembl"; transcript_biotype "protein_coding";
IV	ensembl	exon	254935	255048	.	+	.	gene_id "YDL114W-A"; transcript_id "YDL114W-A"; exon_number "1"; gene_source "ensembl"; gene_biotype "protein_coding"; transcript_name "YDL114W-A"; transcript_source "ensembl"; transcript_biotype "protein_coding"; exon_id "YDL114W-A.1";
IV	ensembl	CDS	254935	255045	.	+	0	gene_id "YDL114W-A"; transcript_id "YDL114W-A"; exon_number "1"; gene_source "ensembl"; gene_biotype "protein_coding"; transcript_name "YDL114W-A"; transcript_source "ensembl"; transcript_biotype "protein_coding"; protein_id "YDL114W-A";
IV	ensembl	start_codon	254935	254937	.	+	0	gene_id "YDL114W-A"; transcript_id "YDL114W-A"; exon_number "1"; gene_source "ensembl"; gene_biotype "protein_coding"; transcript_name "YDL114W-A"; transcript_source "ensembl"; transcript_biotype "protein_coding";
IV	ensembl	stop_codon	255046	255048	.	+	0	gene_id "YDL114W-A"; transcript_id "YDL114W-A"; exon_number "1"; gene_source "ensembl"; gene_biotype "protein_coding"; transcript_name "YDL114W-A"; transcript_source "ensembl"; transcript_biotype "protein_coding";
IV	ensembl	gene	255604	256530	.	+	.	gene_id "YDL114W"; gene_source "ensembl"; gene_biotype "protein_coding";
IV	ensembl	transcript	255604	256530	.	+	.	gene_id "YDL114W"; transcript_id "YDL114W"; gene_source "ensembl"; gene_biotype "protein_coding"; transcript_name "YDL114W"; transcript_source "ensembl"; transcript_biotype "protein_coding";
IV	ensembl	exon	255604	256530	.	+	.	gene_id "YDL114W"; transcript_id "YDL114W"; exon_number "1"; gene_source "ensembl"; gene_biotype "protein_coding"; transcript_name "YDL114W"; transcript_source "ensembl"; transcript_biotype "protein_coding"; exon_id "YDL114W.1";
IV	ensembl	CDS	255604	256527	.	+	0	gene_id "YDL114W"; transcript_id "YDL114W"; exon_number "1"; gene_source "ensembl"; gene_biotype "protein_coding"; transcript_name "YDL114W"; transcript_source "ensembl"; transcript_biotype "protein_coding"; protein_id "YDL114W";
IV	ensembl	start_codon	255604	255606	.	+	0	gene_id "YDL114W"; transcript_id "YDL114W"; exon_number "1"; gene_source "ensembl"; gene_biotype "protein_coding"; transcript_name "YDL114W"; transcript_source "ensembl"; transcript_biotype "protein_coding";
IV	ensembl	stop_codon	256528	256530	.	+	0	gene_id "YDL114W"; transcript_id "YDL114W"; exon_number "1"; gene_source "ensembl"; gene_biotype "protein_coding"; transcript_name "YDL114W"; transcript_source "ensembl"; transcript_biotype "protein_coding";
IV	ensembl	gene	256633	258555	.	-	.	gene_id "YDL113C"; gene_name "ATG20"; gene_source "ensembl"; gene_biotype "protein_coding";
IV	ensembl	transcript	256633	258555	.	-	.	gene_id "YDL113C"; transcript_id "YDL113C"; gene_name "ATG20"; gene_source "ensembl"; gene_biotype "protein_coding"; transcript_name "ATG20"; transcript_source "ensembl"; transcript_biotype "protein_coding";
IV	ensembl	exon	256633	258555	.	-	.	gene_id "YDL113C"; transcript_id "YDL113C"; exon_number "1"; gene_name "ATG20"; gene_source "ensembl"; gene_biotype "protein_coding"; transcript_name "ATG20"; transcript_source "ensembl"; transcript_biotype "protein_coding"; exon_id "YDL113C.1";
IV	ensembl	CDS	256636	258555	.	-	0	gene_id "YDL113C"; transcript_id "YDL113C"; exon_number "1"; gene_name "ATG20"; gene_source "ensembl"; gene_biotype "protein_coding"; transcript_name "ATG20"; transcript_source "ensembl"; transcript_biotype "protein_coding"; protein_id "YDL113C";
IV	ensembl	start_codon	258553	258555	.	-	0	gene_id "YDL113C"; transcript_id "YDL113C"; exon_number "1"; gene_name "ATG20"; gene_source "ensembl"; gene_biotype "protein_coding"; transcript_name "ATG20"; transcript_source "ensembl"; transcript_biotype "protein_coding";
IV	ensembl	stop_codon	256633	256635	.	-	0	gene_id "YDL113C"; transcript_id "YDL113C"; exon_number "1"; gene_name "ATG20"; gene_source "ensembl"; gene_biotype "protein_coding"; transcript_name "ATG20"; transcript_source "ensembl"; transcript_biotype "protein_coding";
IV	ensembl	gene	258915	263225	.	+	.	gene_id "YDL112W"; gene_name "TRM3"; gene_source "ensembl"; gene_biotype "protein_coding";
IV	ensembl	transcript	258915	263225	.	+	.	gene_id "YDL112W"; transcript_id "YDL112W"; gene_name "TRM3"; gene_source "ensembl"; gene_biotype "protein_coding"; transcript_name "TRM3"; transcript_source "ensembl"; transcript_biotype "protein_coding";
IV	ensembl	exon	258915	263225	.	+	.	gene_id "YDL112W"; transcript_id "YDL112W"; exon_number "1"; gene_name "TRM3"; gene_source "ensembl"; gene_biotype "protein_coding"; transcript_name "TRM3"; transcript_source "ensembl"; transcript_biotype "protein_coding"; exon_id "YDL112W.1";
IV	ensembl	CDS	258915	263222	.	+	0	gene_id "YDL112W"; transcript_id "YDL112W"; exon_number "1"; gene_name "TRM3"; gene_source "ensembl"; gene_biotype "protein_coding"; transcript_name "TRM3"; transcript_source "ensembl"; transcript_biotype "protein_coding"; protein_id "YDL112W";
IV	ensembl	start_codon	258915	258917	.	+	0	gene_id "YDL112W"; transcript_id "YDL112W"; exon_number "1"; gene_name "TRM3"; gene_source "ensembl"; gene_biotype "protein_coding"; transcript_name "TRM3"; transcript_source "ensembl"; transcript_biotype "protein_coding";
IV	ensembl	stop_codon	263223	263225	.	+	0	gene_id "YDL112W"; transcript_id "YDL112W"; exon_number "1"; gene_name "TRM3"; gene_source "ensembl"; gene_biotype "protein_coding"; transcript_name "TRM3"; transcript_source "ensembl"; transcript_biotype "protein_coding";
IV	ensembl	gene	263313	264110	.	-	.	gene_id "YDL111C"; gene_name "RRP42"; gene_source "ensembl"; gene_biotype "protein_coding";
IV	ensembl	transcript	263313	264110	.	-	.	gene_id "YDL111C"; transcript_id "YDL111C"; gene_name "RRP42"; gene_source "ensembl"; gene_biotype "protein_coding"; transcript_name "RRP42"; transcript_source "ensembl"; transcript_biotype "protein_coding";
IV	ensembl	exon	263313	264110	.	-	.	gene_id "YDL111C"; transcript_id "YDL111C"; exon_number "1"; gene_name "RRP42"; gene_source "ensembl"; gene_biotype "protein_coding"; transcript_name "RRP42"; transcript_source "ensembl"; transcript_biotype "protein_coding"; exon_id "YDL111C.1";
IV	ensembl	CDS	263316	264110	.	-	0	gene_id "YDL111C"; transcript_id "YDL111C"; exon_number "1"; gene_name "RRP42"; gene_source "ensembl"; gene_biotype "protein_coding"; transcript_name "RRP42"; transcript_source "ensembl"; transcript_biotype "protein_coding"; protein_id "YDL111C";
IV	ensembl	start_codon	264108	264110	.	-	0	gene_id "YDL111C"; transcript_id "YDL111C"; exon_number "1"; gene_name "RRP42"; gene_source "ensembl"; gene_biotype "protein_coding"; transcript_name "RRP42"; transcript_source "ensembl"; transcript_biotype "protein_coding";
IV	ensembl	stop_codon	263313	263315	.	-	0	gene_id "YDL111C"; transcript_id "YDL111C"; exon_number "1"; gene_name "RRP42"; gene_source "ensembl"; gene_biotype "protein_coding"; transcript_name "RRP42"; transcript_source "ensembl"; transcript_biotype "protein_coding";
IV	ensembl	gene	264512	264964	.	-	.	gene_id "YDL110C"; gene_name "TMA17"; gene_source "ensembl"; gene_biotype "protein_coding";
IV	ensembl	transcript	264512	264964	.	-	.	gene_id "YDL110C"; transcript_id "YDL110C"; gene_name "TMA17"; gene_source "ensembl"; gene_biotype "protein_coding"; transcript_name "TMA17"; transcript_source "ensembl"; transcript_biotype "protein_coding";
IV	ensembl	exon	264512	264964	.	-	.	gene_id "YDL110C"; transcript_id "YDL110C"; exon_number "1"; gene_name "TMA17"; gene_source "ensembl"; gene_biotype "protein_coding"; transcript_name "TMA17"; transcript_source "ensembl"; transcript_biotype "protein_coding"; exon_id "YDL110C.1";
IV	ensembl	CDS	264515	264964	.	-	0	gene_id "YDL110C"; transcript_id "YDL110C"; exon_number "1"; gene_name "TMA17"; gene_source "ensembl"; gene_biotype "protein_coding"; transcript_name "TMA17"; transcript_source "ensembl"; transcript_biotype "protein_coding"; protein_id "YDL110C";
IV	ensembl	start_codon	264962	264964	.	-	0	gene_id "YDL110C"; transcript_id "YDL110C"; exon_number "1"; gene_name "TMA17"; gene_source "ensembl"; gene_biotype "protein_coding"; transcript_name "TMA17"; transcript_source "ensembl"; transcript_biotype "protein_coding";
IV	ensembl	stop_codon	264512	264514	.	-	0	gene_id "YDL110C"; transcript_id "YDL110C"; exon_number "1"; gene_name "TMA17"; gene_source "ensembl"; gene_biotype "protein_coding"; transcript_name "TMA17"; transcript_source "ensembl"; transcript_biotype "protein_coding";
IV	ensembl	gene	265258	267201	.	-	.	gene_id "YDL109C"; gene_source "ensembl"; gene_biotype "protein_coding";
IV	ensembl	transcript	265258	267201	.	-	.	gene_id "YDL109C"; transcript_id "YDL109C"; gene_source "ensembl"; gene_biotype "protein_coding"; transcript_name "YDL109C"; transcript_source "ensembl"; transcript_biotype "protein_coding";
IV	ensembl	exon	265258	267201	.	-	.	gene_id "YDL109C"; transcript_id "YDL109C"; exon_number "1"; gene_source "ensembl"; gene_biotype "protein_coding"; transcript_name "YDL109C"; transcript_source "ensembl"; transcript_biotype "protein_coding"; exon_id "YDL109C.1";
IV	ensembl	CDS	265261	267201	.	-	0	gene_id "YDL109C"; transcript_id "YDL109C"; exon_number "1"; gene_source "ensembl"; gene_biotype "protein_coding"; transcript_name "YDL109C"; transcript_source "ensembl"; transcript_biotype "protein_coding"; protein_id "YDL109C";
IV	ensembl	start_codon	267199	267201	.	-	0	gene_id "YDL109C"; transcript_id "YDL109C"; exon_number "1"; gene_source "ensembl"; gene_biotype "protein_coding"; transcript_name "YDL109C"; transcript_source "ensembl"; transcript_biotype "protein_coding";
IV	ensembl	stop_codon	265258	265260	.	-	0	gene_id "YDL109C"; transcript_id "YDL109C"; exon_number "1"; gene_source "ensembl"; gene_biotype "protein_coding"; transcript_name "YDL109C"; transcript_source "ensembl"; transcript_biotype "protein_coding";
IV	ensembl	gene	267698	268699	.	+	.	gene_id "YDL108W"; gene_name "KIN28"; gene_source "ensembl"; gene_biotype "protein_coding";
IV	ensembl	transcript	267698	268699	.	+	.	gene_id "YDL108W"; transcript_id "YDL108W"; gene_name "KIN28"; gene_source "ensembl"; gene_biotype "protein_coding"; transcript_name "KIN28"; transcript_source "ensembl"; transcript_biotype "protein_coding";
IV	ensembl	exon	267698	267725	.	+	.	gene_id "YDL108W"; transcript_id "YDL108W"; exon_number "1"; gene_name "KIN28"; gene_source "ensembl"; gene_biotype "protein_coding"; transcript_name "KIN28"; transcript_source "ensembl"; transcript_biotype "protein_coding"; exon_id "YDL108W.1";
IV	ensembl	CDS	267698	267725	.	+	0	gene_id "YDL108W"; transcript_id "YDL108W"; exon_number "1"; gene_name "KIN28"; gene_source "ensembl"; gene_biotype "protein_coding"; transcript_name "KIN28"; transcript_source "ensembl"; transcript_biotype "protein_coding"; protein_id "YDL108W";
IV	ensembl	start_codon	267698	267700	.	+	0	gene_id "YDL108W"; transcript_id "YDL108W"; exon_number "1"; gene_name "KIN28"; gene_source "ensembl"; gene_biotype "protein_coding"; transcript_name "KIN28"; transcript_source "ensembl"; transcript_biotype "protein_coding";
IV	ensembl	exon	267807	268699	.	+	.	gene_id "YDL108W"; transcript_id "YDL108W"; exon_number "2"; gene_name "KIN28"; gene_source "ensembl"; gene_biotype "protein_coding"; transcript_name "KIN28"; transcript_source "ensembl"; transcript_biotype "protein_coding"; exon_id "YDL108W.2";
IV	ensembl	CDS	267807	268699	.	+	1	gene_id "YDL108W"; transcript_id "YDL108W"; exon_number "2"; gene_name "KIN28"; gene_source "ensembl"; gene_biotype "protein_coding"; transcript_name "KIN28"; transcript_source "ensembl"; transcript_biotype "protein_coding"; protein_id "YDL108W";
IV	ensembl	gene	268921	269976	.	+	.	gene_id "YDL107W"; gene_name "MSS2"; gene_source "ensembl"; gene_biotype "protein_coding";
IV	ensembl	transcript	268921	269976	.	+	.	gene_id "YDL107W"; transcript_id "YDL107W"; gene_name "MSS2"; gene_source "ensembl"; gene_biotype "protein_coding"; transcript_name "MSS2"; transcript_source "ensembl"; transcript_biotype "protein_coding";
IV	ensembl	exon	268921	269976	.	+	.	gene_id "YDL107W"; transcript_id "YDL107W"; exon_number "1"; gene_name "MSS2"; gene_source "ensembl"; gene_biotype "protein_coding"; transcript_name "MSS2"; transcript_source "ensembl"; transcript_biotype "protein_coding"; exon_id "YDL107W.1";
IV	ensembl	CDS	268921	269973	.	+	0	gene_id "YDL107W"; transcript_id "YDL107W"; exon_number "1"; gene_name "MSS2"; gene_source "ensembl"; gene_biotype "protein_coding"; transcript_name "MSS2"; transcript_source "ensembl"; transcript_biotype "protein_coding"; protein_id "YDL107W";
IV	ensembl	start_codon	268921	268923	.	+	0	gene_id "YDL107W"; transcript_id "YDL107W"; exon_number "1"; gene_name "MSS2"; gene_source "ensembl"; gene_biotype "protein_coding"; transcript_name "MSS2"; transcript_source "ensembl"; transcript_biotype "protein_coding";
IV	ensembl	stop_codon	269974	269976	.	+	0	gene_id "YDL107W"; transcript_id "YDL107W"; exon_number "1"; gene_name "MSS2"; gene_source "ensembl"; gene_biotype "protein_coding"; transcript_name "MSS2"; transcript_source "ensembl"; transcript_biotype "protein_coding";
IV	ensembl	gene	270222	271901	.	-	.	gene_id "YDL106C"; gene_name "PHO2"; gene_source "ensembl"; gene_biotype "protein_coding";
IV	ensembl	transcript	270222	271901	.	-	.	gene_id "YDL106C"; transcript_id "YDL106C"; gene_name "PHO2"; gene_source "ensembl"; gene_biotype "protein_coding"; transcript_name "PHO2"; transcript_source "ensembl"; transcript_biotype "protein_coding";
IV	ensembl	exon	270222	271901	.	-	.	gene_id "YDL106C"; transcript_id "YDL106C"; exon_number "1"; gene_name "PHO2"; gene_source "ensembl"; gene_biotype "protein_coding"; transcript_name "PHO2"; transcript_source "ensembl"; transcript_biotype "protein_coding"; exon_id "YDL106C.1";
IV	ensembl	CDS	270225	271901	.	-	0	gene_id "YDL106C"; transcript_id "YDL106C"; exon_number "1"; gene_name "PHO2"; gene_source "ensembl"; gene_biotype "protein_coding"; transcript_name "PHO2"; transcript_source "ensembl"; transcript_biotype "protein_coding"; protein_id "YDL106C";
IV	ensembl	start_codon	271899	271901	.	-	0	gene_id "YDL106C"; transcript_id "YDL106C"; exon_number "1"; gene_name "PHO2"; gene_source "ensembl"; gene_biotype "protein_coding"; transcript_name "PHO2"; transcript_source "ensembl"; transcript_biotype "protein_coding";
IV	ensembl	stop_codon	270222	270224	.	-	0	gene_id "YDL106C"; transcript_id "YDL106C"; exon_number "1"; gene_name "PHO2"; gene_source "ensembl"; gene_biotype "protein_coding"; transcript_name "PHO2"; transcript_source "ensembl"; transcript_biotype "protein_coding";
IV	ensembl	gene	272389	273597	.	+	.	gene_id "YDL105W"; gene_name "NSE4"; gene_source "ensembl"; gene_biotype "protein_coding";
IV	ensembl	transcript	272389	273597	.	+	.	gene_id "YDL105W"; transcript_id "YDL105W"; gene_name "NSE4"; gene_source "ensembl"; gene_biotype "protein_coding"; transcript_name "NSE4"; transcript_source "ensembl"; transcript_biotype "protein_coding";
IV	ensembl	exon	272389	273597	.	+	.	gene_id "YDL105W"; transcript_id "YDL105W"; exon_number "1"; gene_name "NSE4"; gene_source "ensembl"; gene_biotype "protein_coding"; transcript_name "NSE4"; transcript_source "ensembl"; transcript_biotype "protein_coding"; exon_id "YDL105W.1";
IV	ensembl	CDS	272389	273594	.	+	0	gene_id "YDL105W"; transcript_id "YDL105W"; exon_number "1"; gene_name "NSE4"; gene_source "ensembl"; gene_biotype "protein_coding"; transcript_name "NSE4"; transcript_source "ensembl"; transcript_biotype "protein_coding"; protein_id "YDL105W";
IV	ensembl	start_codon	272389	272391	.	+	0	gene_id "YDL105W"; transcript_id "YDL105W"; exon_number "1"; gene_name "NSE4"; gene_source "ensembl"; gene_biotype "protein_coding"; transcript_name "NSE4"; transcript_source "ensembl"; transcript_biotype "protein_coding";
IV	ensembl	stop_codon	273595	273597	.	+	0	gene_id "YDL105W"; transcript_id "YDL105W"; exon_number "1"; gene_name "NSE4"; gene_source "ensembl"; gene_biotype "protein_coding"; transcript_name "NSE4"; transcript_source "ensembl"; transcript_biotype "protein_coding";
IV	ensembl	gene	273653	274876	.	-	.	gene_id "YDL104C"; gene_name "QRI7"; gene_source "ensembl"; gene_biotype "protein_coding";
IV	ensembl	transcript	273653	274876	.	-	.	gene_id "YDL104C"; transcript_id "YDL104C"; gene_name "QRI7"; gene_source "ensembl"; gene_biotype "protein_coding"; transcript_name "QRI7"; transcript_source "ensembl"; transcript_biotype "protein_coding";
IV	ensembl	exon	273653	274876	.	-	.	gene_id "YDL104C"; transcript_id "YDL104C"; exon_number "1"; gene_name "QRI7"; gene_source "ensembl"; gene_biotype "protein_coding"; transcript_name "QRI7"; transcript_source "ensembl"; transcript_biotype "protein_coding"; exon_id "YDL104C.1";
IV	ensembl	CDS	273656	274876	.	-	0	gene_id "YDL104C"; transcript_id "YDL104C"; exon_number "1"; gene_name "QRI7"; gene_source "ensembl"; gene_biotype "protein_coding"; transcript_name "QRI7"; transcript_source "ensembl"; transcript_biotype "protein_coding"; protein_id "YDL104C";
IV	ensembl	start_codon	274874	274876	.	-	0	gene_id "YDL104C"; transcript_id "YDL104C"; exon_number "1"; gene_name "QRI7"; gene_source "ensembl"; gene_biotype "protein_coding"; transcript_name "QRI7"; transcript_source "ensembl"; transcript_biotype "protein_coding";
IV	ensembl	stop_codon	273653	273655	.	-	0	gene_id "YDL104C"; transcript_id "YDL104C"; exon_number "1"; gene_name "QRI7"; gene_source "ensembl"; gene_biotype "protein_coding"; transcript_name "QRI7"; transcript_source "ensembl"; transcript_biotype "protein_coding";
IV	ensembl	gene	275148	276581	.	-	.	gene_id "YDL103C"; gene_name "QRI1"; gene_source "ensembl"; gene_biotype "protein_coding";
IV	ensembl	transcript	275148	276581	.	-	.	gene_id "YDL103C"; transcript_id "YDL103C"; gene_name "QRI1"; gene_source "ensembl"; gene_biotype "protein_coding"; transcript_name "QRI1"; transcript_source "ensembl"; transcript_biotype "protein_coding";
IV	ensembl	exon	275148	276581	.	-	.	gene_id "YDL103C"; transcript_id "YDL103C"; exon_number "1"; gene_name "QRI1"; gene_source "ensembl"; gene_biotype "protein_coding"; transcript_name "QRI1"; transcript_source "ensembl"; transcript_biotype "protein_coding"; exon_id "YDL103C.1";
IV	ensembl	CDS	275151	276581	.	-	0	gene_id "YDL103C"; transcript_id "YDL103C"; exon_number "1"; gene_name "QRI1"; gene_source "ensembl"; gene_biotype "protein_coding"; transcript_name "QRI1"; transcript_source "ensembl"; transcript_biotype "protein_coding"; protein_id "YDL103C";
IV	ensembl	start_codon	276579	276581	.	-	0	gene_id "YDL103C"; transcript_id "YDL103C"; exon_number "1"; gene_name "QRI1"; gene_source "ensembl"; gene_biotype "protein_coding"; transcript_name "QRI1"; transcript_source "ensembl"; transcript_biotype "protein_coding";
IV	ensembl	stop_codon	275148	275150	.	-	0	gene_id "YDL103C"; transcript_id "YDL103C"; exon_number "1"; gene_name "QRI1"; gene_source "ensembl"; gene_biotype "protein_coding"; transcript_name "QRI1"; transcript_source "ensembl"; transcript_biotype "protein_coding";
IV	ensembl	gene	276872	280165	.	+	.	gene_id "YDL102W"; gene_name "POL3"; gene_source "ensembl"; gene_biotype "protein_coding";
IV	ensembl	transcript	276872	280165	.	+	.	gene_id "YDL102W"; transcript_id "YDL102W"; gene_name "POL3"; gene_source "ensembl"; gene_biotype "protein_coding"; transcript_name "POL3"; transcript_source "ensembl"; transcript_biotype "protein_coding";
IV	ensembl	exon	276872	280165	.	+	.	gene_id "YDL102W"; transcript_id "YDL102W"; exon_number "1"; gene_name "POL3"; gene_source "ensembl"; gene_biotype "protein_coding"; transcript_name "POL3"; transcript_source "ensembl"; transcript_biotype "protein_coding"; exon_id "YDL102W.1";
IV	ensembl	CDS	276872	280162	.	+	0	gene_id "YDL102W"; transcript_id "YDL102W"; exon_number "1"; gene_name "POL3"; gene_source "ensembl"; gene_biotype "protein_coding"; transcript_name "POL3"; transcript_source "ensembl"; transcript_biotype "protein_coding"; protein_id "YDL102W";
IV	ensembl	start_codon	276872	276874	.	+	0	gene_id "YDL102W"; transcript_id "YDL102W"; exon_number "1"; gene_name "POL3"; gene_source "ensembl"; gene_biotype "protein_coding"; transcript_name "POL3"; transcript_source "ensembl"; transcript_biotype "protein_coding";
IV	ensembl	stop_codon	280163	280165	.	+	0	gene_id "YDL102W"; transcript_id "YDL102W"; exon_number "1"; gene_name "POL3"; gene_source "ensembl"; gene_biotype "protein_coding"; transcript_name "POL3"; transcript_source "ensembl"; transcript_biotype "protein_coding";
IV	ensembl	gene	280307	281848	.	-	.	gene_id "YDL101C"; gene_name "DUN1"; gene_source "ensembl"; gene_biotype "protein_coding";
IV	ensembl	transcript	280307	281848	.	-	.	gene_id "YDL101C"; transcript_id "YDL101C"; gene_name "DUN1"; gene_source "ensembl"; gene_biotype "protein_coding"; transcript_name "DUN1"; transcript_source "ensembl"; transcript_biotype "protein_coding";
IV	ensembl	exon	280307	281848	.	-	.	gene_id "YDL101C"; transcript_id "YDL101C"; exon_number "1"; gene_name "DUN1"; gene_source "ensembl"; gene_biotype "protein_coding"; transcript_name "DUN1"; transcript_source "ensembl"; transcript_biotype "protein_coding"; exon_id "YDL101C.1";
IV	ensembl	CDS	280310	281848	.	-	0	gene_id "YDL101C"; transcript_id "YDL101C"; exon_number "1"; gene_name "DUN1"; gene_source "ensembl"; gene_biotype "protein_coding"; transcript_name "DUN1"; transcript_source "ensembl"; transcript_biotype "protein_coding"; protein_id "YDL101C";
IV	ensembl	start_codon	281846	281848	.	-	0	gene_id "YDL101C"; transcript_id "YDL101C"; exon_number "1"; gene_name "DUN1"; gene_source "ensembl"; gene_biotype "protein_coding"; transcript_name "DUN1"; transcript_source "ensembl"; transcript_biotype "protein_coding";
IV	ensembl	stop_codon	280307	280309	.	-	0	gene_id "YDL101C"; transcript_id "YDL101C"; exon_number "1"; gene_name "DUN1"; gene_source "ensembl"; gene_biotype "protein_coding"; transcript_name "DUN1"; transcript_source "ensembl"; transcript_biotype "protein_coding";
IV	ensembl	gene	282112	283176	.	-	.	gene_id "YDL100C"; gene_name "GET3"; gene_source "ensembl"; gene_biotype "protein_coding";
IV	ensembl	transcript	282112	283176	.	-	.	gene_id "YDL100C"; transcript_id "YDL100C"; gene_name "GET3"; gene_source "ensembl"; gene_biotype "protein_coding"; transcript_name "GET3"; transcript_source "ensembl"; transcript_biotype "protein_coding";
IV	ensembl	exon	282112	283176	.	-	.	gene_id "YDL100C"; transcript_id "YDL100C"; exon_number "1"; gene_name "GET3"; gene_source "ensembl"; gene_biotype "protein_coding"; transcript_name "GET3"; transcript_source "ensembl"; transcript_biotype "protein_coding"; exon_id "YDL100C.1";
IV	ensembl	CDS	282115	283176	.	-	0	gene_id "YDL100C"; transcript_id "YDL100C"; exon_number "1"; gene_name "GET3"; gene_source "ensembl"; gene_biotype "protein_coding"; transcript_name "GET3"; transcript_source "ensembl"; transcript_biotype "protein_coding"; protein_id "YDL100C";
IV	ensembl	start_codon	283174	283176	.	-	0	gene_id "YDL100C"; transcript_id "YDL100C"; exon_number "1"; gene_name "GET3"; gene_source "ensembl"; gene_biotype "protein_coding"; transcript_name "GET3"; transcript_source "ensembl"; transcript_biotype "protein_coding";
IV	ensembl	stop_codon	282112	282114	.	-	0	gene_id "YDL100C"; transcript_id "YDL100C"; exon_number "1"; gene_name "GET3"; gene_source "ensembl"; gene_biotype "protein_coding"; transcript_name "GET3"; transcript_source "ensembl"; transcript_biotype "protein_coding";
IV	ensembl	gene	283419	284444	.	+	.	gene_id "YDL099W"; gene_name "BUG1"; gene_source "ensembl"; gene_biotype "protein_coding";
IV	ensembl	transcript	283419	284444	.	+	.	gene_id "YDL099W"; transcript_id "YDL099W"; gene_name "BUG1"; gene_source "ensembl"; gene_biotype "protein_coding"; transcript_name "BUG1"; transcript_source "ensembl"; transcript_biotype "protein_coding";
IV	ensembl	exon	283419	284444	.	+	.	gene_id "YDL099W"; transcript_id "YDL099W"; exon_number "1"; gene_name "BUG1"; gene_source "ensembl"; gene_biotype "protein_coding"; transcript_name "BUG1"; transcript_source "ensembl"; transcript_biotype "protein_coding"; exon_id "YDL099W.1";
IV	ensembl	CDS	283419	284441	.	+	0	gene_id "YDL099W"; transcript_id "YDL099W"; exon_number "1"; gene_name "BUG1"; gene_source "ensembl"; gene_biotype "protein_coding"; transcript_name "BUG1"; transcript_source "ensembl"; transcript_biotype "protein_coding"; protein_id "YDL099W";
IV	ensembl	start_codon	283419	283421	.	+	0	gene_id "YDL099W"; transcript_id "YDL099W"; exon_number "1"; gene_name "BUG1"; gene_source "ensembl"; gene_biotype "protein_coding"; transcript_name "BUG1"; transcript_source "ensembl"; transcript_biotype "protein_coding";
IV	ensembl	stop_codon	284442	284444	.	+	0	gene_id "YDL099W"; transcript_id "YDL099W"; exon_number "1"; gene_name "BUG1"; gene_source "ensembl"; gene_biotype "protein_coding"; transcript_name "BUG1"; transcript_source "ensembl"; transcript_biotype "protein_coding";
IV	ensembl	gene	284581	285165	.	-	.	gene_id "YDL098C"; gene_name "SNU23"; gene_source "ensembl"; gene_biotype "protein_coding";
IV	ensembl	transcript	284581	285165	.	-	.	gene_id "YDL098C"; transcript_id "YDL098C"; gene_name "SNU23"; gene_source "ensembl"; gene_biotype "protein_coding"; transcript_name "SNU23"; transcript_source "ensembl"; transcript_biotype "protein_coding";
IV	ensembl	exon	284581	285165	.	-	.	gene_id "YDL098C"; transcript_id "YDL098C"; exon_number "1"; gene_name "SNU23"; gene_source "ensembl"; gene_biotype "protein_coding"; transcript_name "SNU23"; transcript_source "ensembl"; transcript_biotype "protein_coding"; exon_id "YDL098C.1";
IV	ensembl	CDS	284584	285165	.	-	0	gene_id "YDL098C"; transcript_id "YDL098C"; exon_number "1"; gene_name "SNU23"; gene_source "ensembl"; gene_biotype "protein_coding"; transcript_name "SNU23"; transcript_source "ensembl"; transcript_biotype "protein_coding"; protein_id "YDL098C";
IV	ensembl	start_codon	285163	285165	.	-	0	gene_id "YDL098C"; transcript_id "YDL098C"; exon_number "1"; gene_name "SNU23"; gene_source "ensembl"; gene_biotype "protein_coding"; transcript_name "SNU23"; transcript_source "ensembl"; transcript_biotype "protein_coding";
IV	ensembl	stop_codon	284581	284583	.	-	0	gene_id "YDL098C"; transcript_id "YDL098C"; exon_number "1"; gene_name "SNU23"; gene_source "ensembl"; gene_biotype "protein_coding"; transcript_name "SNU23"; transcript_source "ensembl"; transcript_biotype "protein_coding";
IV	ensembl	gene	285391	286695	.	-	.	gene_id "YDL097C"; gene_name "RPN6"; gene_source "ensembl"; gene_biotype "protein_coding";
IV	ensembl	transcript	285391	286695	.	-	.	gene_id "YDL097C"; transcript_id "YDL097C"; gene_name "RPN6"; gene_source "ensembl"; gene_biotype "protein_coding"; transcript_name "RPN6"; transcript_source "ensembl"; transcript_biotype "protein_coding";
IV	ensembl	exon	285391	286695	.	-	.	gene_id "YDL097C"; transcript_id "YDL097C"; exon_number "1"; gene_name "RPN6"; gene_source "ensembl"; gene_biotype "protein_coding"; transcript_name "RPN6"; transcript_source "ensembl"; transcript_biotype "protein_coding"; exon_id "YDL097C.1";
IV	ensembl	CDS	285394	286695	.	-	0	gene_id "YDL097C"; transcript_id "YDL097C"; exon_number "1"; gene_name "RPN6"; gene_source "ensembl"; gene_biotype "protein_coding"; transcript_name "RPN6"; transcript_source "ensembl"; transcript_biotype "protein_coding"; protein_id "YDL097C";
IV	ensembl	start_codon	286693	286695	.	-	0	gene_id "YDL097C"; transcript_id "YDL097C"; exon_number "1"; gene_name "RPN6"; gene_source "ensembl"; gene_biotype "protein_coding"; transcript_name "RPN6"; transcript_source "ensembl"; transcript_biotype "protein_coding";
IV	ensembl	stop_codon	285391	285393	.	-	0	gene_id "YDL097C"; transcript_id "YDL097C"; exon_number "1"; gene_name "RPN6"; gene_source "ensembl"; gene_biotype "protein_coding"; transcript_name "RPN6"; transcript_source "ensembl"; transcript_biotype "protein_coding";
IV	ensembl	gene	286998	287324	.	-	.	gene_id "YDL096C"; gene_name "OPI6"; gene_source "ensembl"; gene_biotype "protein_coding";
IV	ensembl	transcript	286998	287324	.	-	.	gene_id "YDL096C"; transcript_id "YDL096C"; gene_name "OPI6"; gene_source "ensembl"; gene_biotype "protein_coding"; transcript_name "OPI6"; transcript_source "ensembl"; transcript_biotype "protein_coding";
IV	ensembl	exon	286998	287324	.	-	.	gene_id "YDL096C"; transcript_id "YDL096C"; exon_number "1"; gene_name "OPI6"; gene_source "ensembl"; gene_biotype "protein_coding"; transcript_name "OPI6"; transcript_source "ensembl"; transcript_biotype "protein_coding"; exon_id "YDL096C.1";
IV	ensembl	CDS	287001	287324	.	-	0	gene_id "YDL096C"; transcript_id "YDL096C"; exon_number "1"; gene_name "OPI6"; gene_source "ensembl"; gene_biotype "protein_coding"; transcript_name "OPI6"; transcript_source "ensembl"; transcript_biotype "protein_coding"; protein_id "YDL096C";
IV	ensembl	start_codon	287322	287324	.	-	0	gene_id "YDL096C"; transcript_id "YDL096C"; exon_number "1"; gene_name "OPI6"; gene_source "ensembl"; gene_biotype "protein_coding"; transcript_name "OPI6"; transcript_source "ensembl"; transcript_biotype "protein_coding";
IV	ensembl	stop_codon	286998	287000	.	-	0	gene_id "YDL096C"; transcript_id "YDL096C"; exon_number "1"; gene_name "OPI6"; gene_source "ensembl"; gene_biotype "protein_coding"; transcript_name "OPI6"; transcript_source "ensembl"; transcript_biotype "protein_coding";
IV	ensembl	gene	287059	289512	.	+	.	gene_id "YDL095W"; gene_name "PMT1"; gene_source "ensembl"; gene_biotype "protein_coding";
IV	ensembl	transcript	287059	289512	.	+	.	gene_id "YDL095W"; transcript_id "YDL095W"; gene_name "PMT1"; gene_source "ensembl"; gene_biotype "protein_coding"; transcript_name "PMT1"; transcript_source "ensembl"; transcript_biotype "protein_coding";
IV	ensembl	exon	287059	289512	.	+	.	gene_id "YDL095W"; transcript_id "YDL095W"; exon_number "1"; gene_name "PMT1"; gene_source "ensembl"; gene_biotype "protein_coding"; transcript_name "PMT1"; transcript_source "ensembl"; transcript_biotype "protein_coding"; exon_id "YDL095W.1";
IV	ensembl	CDS	287059	289509	.	+	0	gene_id "YDL095W"; transcript_id "YDL095W"; exon_number "1"; gene_name "PMT1"; gene_source "ensembl"; gene_biotype "protein_coding"; transcript_name "PMT1"; transcript_source "ensembl"; transcript_biotype "protein_coding"; protein_id "YDL095W";
IV	ensembl	start_codon	287059	287061	.	+	0	gene_id "YDL095W"; transcript_id "YDL095W"; exon_number "1"; gene_name "PMT1"; gene_source "ensembl"; gene_biotype "protein_coding"; transcript_name "PMT1"; transcript_source "ensembl"; transcript_biotype "protein_coding";
IV	ensembl	stop_codon	289510	289512	.	+	0	gene_id "YDL095W"; transcript_id "YDL095W"; exon_number "1"; gene_name "PMT1"; gene_source "ensembl"; gene_biotype "protein_coding"; transcript_name "PMT1"; transcript_source "ensembl"; transcript_biotype "protein_coding";
IV	ensembl	gene	289572	290081	.	-	.	gene_id "YDL094C"; gene_source "ensembl"; gene_biotype "protein_coding";
IV	ensembl	transcript	289572	290081	.	-	.	gene_id "YDL094C"; transcript_id "YDL094C"; gene_source "ensembl"; gene_biotype "protein_coding"; transcript_name "YDL094C"; transcript_source "ensembl"; transcript_biotype "protein_coding";
IV	ensembl	exon	289572	290081	.	-	.	gene_id "YDL094C"; transcript_id "YDL094C"; exon_number "1"; gene_source "ensembl"; gene_biotype "protein_coding"; transcript_name "YDL094C"; transcript_source "ensembl"; transcript_biotype "protein_coding"; exon_id "YDL094C.1";
IV	ensembl	CDS	289575	290081	.	-	0	gene_id "YDL094C"; transcript_id "YDL094C"; exon_number "1"; gene_source "ensembl"; gene_biotype "protein_coding"; transcript_name "YDL094C"; transcript_source "ensembl"; transcript_biotype "protein_coding"; protein_id "YDL094C";
IV	ensembl	start_codon	290079	290081	.	-	0	gene_id "YDL094C"; transcript_id "YDL094C"; exon_number "1"; gene_source "ensembl"; gene_biotype "protein_coding"; transcript_name "YDL094C"; transcript_source "ensembl"; transcript_biotype "protein_coding";
IV	ensembl	stop_codon	289572	289574	.	-	0	gene_id "YDL094C"; transcript_id "YDL094C"; exon_number "1"; gene_source "ensembl"; gene_biotype "protein_coding"; transcript_name "YDL094C"; transcript_source "ensembl"; transcript_biotype "protein_coding";
IV	ensembl	gene	289909	292140	.	+	.	gene_id "YDL093W"; gene_name "PMT5"; gene_source "ensembl"; gene_biotype "protein_coding";
IV	ensembl	transcript	289909	292140	.	+	.	gene_id "YDL093W"; transcript_id "YDL093W"; gene_name "PMT5"; gene_source "ensembl"; gene_biotype "protein_coding"; transcript_name "PMT5"; transcript_source "ensembl"; transcript_biotype "protein_coding";
IV	ensembl	exon	289909	292140	.	+	.	gene_id "YDL093W"; transcript_id "YDL093W"; exon_number "1"; gene_name "PMT5"; gene_source "ensembl"; gene_biotype "protein_coding"; transcript_name "PMT5"; transcript_source "ensembl"; transcript_biotype "protein_coding"; exon_id "YDL093W.1";
IV	ensembl	CDS	289909	292137	.	+	0	gene_id "YDL093W"; transcript_id "YDL093W"; exon_number "1"; gene_name "PMT5"; gene_source "ensembl"; gene_biotype "protein_coding"; transcript_name "PMT5"; transcript_source "ensembl"; transcript_biotype "protein_coding"; protein_id "YDL093W";
IV	ensembl	start_codon	289909	289911	.	+	0	gene_id "YDL093W"; transcript_id "YDL093W"; exon_number "1"; gene_name "PMT5"; gene_source "ensembl"; gene_biotype "protein_coding"; transcript_name "PMT5"; transcript_source "ensembl"; transcript_biotype "protein_coding";
IV	ensembl	stop_codon	292138	292140	.	+	0	gene_id "YDL093W"; transcript_id "YDL093W"; exon_number "1"; gene_name "PMT5"; gene_source "ensembl"; gene_biotype "protein_coding"; transcript_name "PMT5"; transcript_source "ensembl"; transcript_biotype "protein_coding";
IV	ensembl	gene	292781	293221	.	+	.	gene_id "YDL092W"; gene_name "SRP14"; gene_source "ensembl"; gene_biotype "protein_coding";
IV	ensembl	transcript	292781	293221	.	+	.	gene_id "YDL092W"; transcript_id "YDL092W"; gene_name "SRP14"; gene_source "ensembl"; gene_biotype "protein_coding"; transcript_name "SRP14"; transcript_source "ensembl"; transcript_biotype "protein_coding";
IV	ensembl	exon	292781	293221	.	+	.	gene_id "YDL092W"; transcript_id "YDL092W"; exon_number "1"; gene_name "SRP14"; gene_source "ensembl"; gene_biotype "protein_coding"; transcript_name "SRP14"; transcript_source "ensembl"; transcript_biotype "protein_coding"; exon_id "YDL092W.1";
IV	ensembl	CDS	292781	293218	.	+	0	gene_id "YDL092W"; transcript_id "YDL092W"; exon_number "1"; gene_name "SRP14"; gene_source "ensembl"; gene_biotype "protein_coding"; transcript_name "SRP14"; transcript_source "ensembl"; transcript_biotype "protein_coding"; protein_id "YDL092W";
IV	ensembl	start_codon	292781	292783	.	+	0	gene_id "YDL092W"; transcript_id "YDL092W"; exon_number "1"; gene_name "SRP14"; gene_source "ensembl"; gene_biotype "protein_coding"; transcript_name "SRP14"; transcript_source "ensembl"; transcript_biotype "protein_coding";
IV	ensembl	stop_codon	293219	293221	.	+	0	gene_id "YDL092W"; transcript_id "YDL092W"; exon_number "1"; gene_name "SRP14"; gene_source "ensembl"; gene_biotype "protein_coding"; transcript_name "SRP14"; transcript_source "ensembl"; transcript_biotype "protein_coding";
IV	ensembl	gene	293392	294759	.	-	.	gene_id "YDL091C"; gene_name "UBX3"; gene_source "ensembl"; gene_biotype "protein_coding";
IV	ensembl	transcript	293392	294759	.	-	.	gene_id "YDL091C"; transcript_id "YDL091C"; gene_name "UBX3"; gene_source "ensembl"; gene_biotype "protein_coding"; transcript_name "UBX3"; transcript_source "ensembl"; transcript_biotype "protein_coding";
IV	ensembl	exon	293392	294759	.	-	.	gene_id "YDL091C"; transcript_id "YDL091C"; exon_number "1"; gene_name "UBX3"; gene_source "ensembl"; gene_biotype "protein_coding"; transcript_name "UBX3"; transcript_source "ensembl"; transcript_biotype "protein_coding"; exon_id "YDL091C.1";
IV	ensembl	CDS	293395	294759	.	-	0	gene_id "YDL091C"; transcript_id "YDL091C"; exon_number "1"; gene_name "UBX3"; gene_source "ensembl"; gene_biotype "protein_coding"; transcript_name "UBX3"; transcript_source "ensembl"; transcript_biotype "protein_coding"; protein_id "YDL091C";
IV	ensembl	start_codon	294757	294759	.	-	0	gene_id "YDL091C"; transcript_id "YDL091C"; exon_number "1"; gene_name "UBX3"; gene_source "ensembl"; gene_biotype "protein_coding"; transcript_name "UBX3"; transcript_source "ensembl"; transcript_biotype "protein_coding";
IV	ensembl	stop_codon	293392	293394	.	-	0	gene_id "YDL091C"; transcript_id "YDL091C"; exon_number "1"; gene_name "UBX3"; gene_source "ensembl"; gene_biotype "protein_coding"; transcript_name "UBX3"; transcript_source "ensembl"; transcript_biotype "protein_coding";
IV	ensembl	gene	295034	296329	.	-	.	gene_id "YDL090C"; gene_name "RAM1"; gene_source "ensembl"; gene_biotype "protein_coding";
IV	ensembl	transcript	295034	296329	.	-	.	gene_id "YDL090C"; transcript_id "YDL090C"; gene_name "RAM1"; gene_source "ensembl"; gene_biotype "protein_coding"; transcript_name "RAM1"; transcript_source "ensembl"; transcript_biotype "protein_coding";
IV	ensembl	exon	295034	296329	.	-	.	gene_id "YDL090C"; transcript_id "YDL090C"; exon_number "1"; gene_name "RAM1"; gene_source "ensembl"; gene_biotype "protein_coding"; transcript_name "RAM1"; transcript_source "ensembl"; transcript_biotype "protein_coding"; exon_id "YDL090C.1";
IV	ensembl	CDS	295037	296329	.	-	0	gene_id "YDL090C"; transcript_id "YDL090C"; exon_number "1"; gene_name "RAM1"; gene_source "ensembl"; gene_biotype "protein_coding"; transcript_name "RAM1"; transcript_source "ensembl"; transcript_biotype "protein_coding"; protein_id "YDL090C";
IV	ensembl	start_codon	296327	296329	.	-	0	gene_id "YDL090C"; transcript_id "YDL090C"; exon_number "1"; gene_name "RAM1"; gene_source "ensembl"; gene_biotype "protein_coding"; transcript_name "RAM1"; transcript_source "ensembl"; transcript_biotype "protein_coding";
IV	ensembl	stop_codon	295034	295036	.	-	0	gene_id "YDL090C"; transcript_id "YDL090C"; exon_number "1"; gene_name "RAM1"; gene_source "ensembl"; gene_biotype "protein_coding"; transcript_name "RAM1"; transcript_source "ensembl"; transcript_biotype "protein_coding";
IV	ensembl	gene	296820	298274	.	+	.	gene_id "YDL089W"; gene_name "NUR1"; gene_source "ensembl"; gene_biotype "protein_coding";
IV	ensembl	transcript	296820	298274	.	+	.	gene_id "YDL089W"; transcript_id "YDL089W"; gene_name "NUR1"; gene_source "ensembl"; gene_biotype "protein_coding"; transcript_name "NUR1"; transcript_source "ensembl"; transcript_biotype "protein_coding";
IV	ensembl	exon	296820	298274	.	+	.	gene_id "YDL089W"; transcript_id "YDL089W"; exon_number "1"; gene_name "NUR1"; gene_source "ensembl"; gene_biotype "protein_coding"; transcript_name "NUR1"; transcript_source "ensembl"; transcript_biotype "protein_coding"; exon_id "YDL089W.1";
IV	ensembl	CDS	296820	298271	.	+	0	gene_id "YDL089W"; transcript_id "YDL089W"; exon_number "1"; gene_name "NUR1"; gene_source "ensembl"; gene_biotype "protein_coding"; transcript_name "NUR1"; transcript_source "ensembl"; transcript_biotype "protein_coding"; protein_id "YDL089W";
IV	ensembl	start_codon	296820	296822	.	+	0	gene_id "YDL089W"; transcript_id "YDL089W"; exon_number "1"; gene_name "NUR1"; gene_source "ensembl"; gene_biotype "protein_coding"; transcript_name "NUR1"; transcript_source "ensembl"; transcript_biotype "protein_coding";
IV	ensembl	stop_codon	298272	298274	.	+	0	gene_id "YDL089W"; transcript_id "YDL089W"; exon_number "1"; gene_name "NUR1"; gene_source "ensembl"; gene_biotype "protein_coding"; transcript_name "NUR1"; transcript_source "ensembl"; transcript_biotype "protein_coding";
IV	ensembl	gene	298417	300003	.	-	.	gene_id "YDL088C"; gene_name "ASM4"; gene_source "ensembl"; gene_biotype "protein_coding";
IV	ensembl	transcript	298417	300003	.	-	.	gene_id "YDL088C"; transcript_id "YDL088C"; gene_name "ASM4"; gene_source "ensembl"; gene_biotype "protein_coding"; transcript_name "ASM4"; transcript_source "ensembl"; transcript_biotype "protein_coding";
IV	ensembl	exon	298417	300003	.	-	.	gene_id "YDL088C"; transcript_id "YDL088C"; exon_number "1"; gene_name "ASM4"; gene_source "ensembl"; gene_biotype "protein_coding"; transcript_name "ASM4"; transcript_source "ensembl"; transcript_biotype "protein_coding"; exon_id "YDL088C.1";
IV	ensembl	CDS	298420	300003	.	-	0	gene_id "YDL088C"; transcript_id "YDL088C"; exon_number "1"; gene_name "ASM4"; gene_source "ensembl"; gene_biotype "protein_coding"; transcript_name "ASM4"; transcript_source "ensembl"; transcript_biotype "protein_coding"; protein_id "YDL088C";
IV	ensembl	start_codon	300001	300003	.	-	0	gene_id "YDL088C"; transcript_id "YDL088C"; exon_number "1"; gene_name "ASM4"; gene_source "ensembl"; gene_biotype "protein_coding"; transcript_name "ASM4"; transcript_source "ensembl"; transcript_biotype "protein_coding";
IV	ensembl	stop_codon	298417	298419	.	-	0	gene_id "YDL088C"; transcript_id "YDL088C"; exon_number "1"; gene_name "ASM4"; gene_source "ensembl"; gene_biotype "protein_coding"; transcript_name "ASM4"; transcript_source "ensembl"; transcript_biotype "protein_coding";
IV	ensembl	gene	300214	300999	.	-	.	gene_id "YDL087C"; gene_name "LUC7"; gene_source "ensembl"; gene_biotype "protein_coding";
IV	ensembl	transcript	300214	300999	.	-	.	gene_id "YDL087C"; transcript_id "YDL087C"; gene_name "LUC7"; gene_source "ensembl"; gene_biotype "protein_coding"; transcript_name "LUC7"; transcript_source "ensembl"; transcript_biotype "protein_coding";
IV	ensembl	exon	300214	300999	.	-	.	gene_id "YDL087C"; transcript_id "YDL087C"; exon_number "1"; gene_name "LUC7"; gene_source "ensembl"; gene_biotype "protein_coding"; transcript_name "LUC7"; transcript_source "ensembl"; transcript_biotype "protein_coding"; exon_id "YDL087C.1";
IV	ensembl	CDS	300217	300999	.	-	0	gene_id "YDL087C"; transcript_id "YDL087C"; exon_number "1"; gene_name "LUC7"; gene_source "ensembl"; gene_biotype "protein_coding"; transcript_name "LUC7"; transcript_source "ensembl"; transcript_biotype "protein_coding"; protein_id "YDL087C";
IV	ensembl	start_codon	300997	300999	.	-	0	gene_id "YDL087C"; transcript_id "YDL087C"; exon_number "1"; gene_name "LUC7"; gene_source "ensembl"; gene_biotype "protein_coding"; transcript_name "LUC7"; transcript_source "ensembl"; transcript_biotype "protein_coding";
IV	ensembl	stop_codon	300214	300216	.	-	0	gene_id "YDL087C"; transcript_id "YDL087C"; exon_number "1"; gene_name "LUC7"; gene_source "ensembl"; gene_biotype "protein_coding"; transcript_name "LUC7"; transcript_source "ensembl"; transcript_biotype "protein_coding";
IV	ensembl	gene	301413	302234	.	+	.	gene_id "YDL086W"; gene_source "ensembl"; gene_biotype "protein_coding";
IV	ensembl	transcript	301413	302234	.	+	.	gene_id "YDL086W"; transcript_id "YDL086W"; gene_source "ensembl"; gene_biotype "protein_coding"; transcript_name "YDL086W"; transcript_source "ensembl"; transcript_biotype "protein_coding";
IV	ensembl	exon	301413	302234	.	+	.	gene_id "YDL086W"; transcript_id "YDL086W"; exon_number "1"; gene_source "ensembl"; gene_biotype "protein_coding"; transcript_name "YDL086W"; transcript_source "ensembl"; transcript_biotype "protein_coding"; exon_id "YDL086W.1";
IV	ensembl	CDS	301413	302231	.	+	0	gene_id "YDL086W"; transcript_id "YDL086W"; exon_number "1"; gene_source "ensembl"; gene_biotype "protein_coding"; transcript_name "YDL086W"; transcript_source "ensembl"; transcript_biotype "protein_coding"; protein_id "YDL086W";
IV	ensembl	start_codon	301413	301415	.	+	0	gene_id "YDL086W"; transcript_id "YDL086W"; exon_number "1"; gene_source "ensembl"; gene_biotype "protein_coding"; transcript_name "YDL086W"; transcript_source "ensembl"; transcript_biotype "protein_coding";
IV	ensembl	stop_codon	302232	302234	.	+	0	gene_id "YDL086W"; transcript_id "YDL086W"; exon_number "1"; gene_source "ensembl"; gene_biotype "protein_coding"; transcript_name "YDL086W"; transcript_source "ensembl"; transcript_biotype "protein_coding";
IV	ensembl	gene	301655	302089	.	-	.	gene_id "YDL086C-A"; gene_source "ensembl"; gene_biotype "protein_coding";
IV	ensembl	transcript	301655	302089	.	-	.	gene_id "YDL086C-A"; transcript_id "YDL086C-A"; gene_source "ensembl"; gene_biotype "protein_coding"; transcript_name "YDL086C-A"; transcript_source "ensembl"; transcript_biotype "protein_coding";
IV	ensembl	exon	301655	302089	.	-	.	gene_id "YDL086C-A"; transcript_id "YDL086C-A"; exon_number "1"; gene_source "ensembl"; gene_biotype "protein_coding"; transcript_name "YDL086C-A"; transcript_source "ensembl"; transcript_biotype "protein_coding"; exon_id "YDL086C-A.1";
IV	ensembl	CDS	301658	302089	.	-	0	gene_id "YDL086C-A"; transcript_id "YDL086C-A"; exon_number "1"; gene_source "ensembl"; gene_biotype "protein_coding"; transcript_name "YDL086C-A"; transcript_source "ensembl"; transcript_biotype "protein_coding"; protein_id "YDL086C-A";
IV	ensembl	start_codon	302087	302089	.	-	0	gene_id "YDL086C-A"; transcript_id "YDL086C-A"; exon_number "1"; gene_source "ensembl"; gene_biotype "protein_coding"; transcript_name "YDL086C-A"; transcript_source "ensembl"; transcript_biotype "protein_coding";
IV	ensembl	stop_codon	301655	301657	.	-	0	gene_id "YDL086C-A"; transcript_id "YDL086C-A"; exon_number "1"; gene_source "ensembl"; gene_biotype "protein_coding"; transcript_name "YDL086C-A"; transcript_source "ensembl"; transcript_biotype "protein_coding";
IV	ensembl	gene	302464	302670	.	-	.	gene_id "YDL085C-A"; gene_source "ensembl"; gene_biotype "protein_coding";
IV	ensembl	transcript	302464	302670	.	-	.	gene_id "YDL085C-A"; transcript_id "YDL085C-A"; gene_source "ensembl"; gene_biotype "protein_coding"; transcript_name "YDL085C-A"; transcript_source "ensembl"; transcript_biotype "protein_coding";
IV	ensembl	exon	302464	302670	.	-	.	gene_id "YDL085C-A"; transcript_id "YDL085C-A"; exon_number "1"; gene_source "ensembl"; gene_biotype "protein_coding"; transcript_name "YDL085C-A"; transcript_source "ensembl"; transcript_biotype "protein_coding"; exon_id "YDL085C-A.1";
IV	ensembl	CDS	302467	302670	.	-	0	gene_id "YDL085C-A"; transcript_id "YDL085C-A"; exon_number "1"; gene_source "ensembl"; gene_biotype "protein_coding"; transcript_name "YDL085C-A"; transcript_source "ensembl"; transcript_biotype "protein_coding"; protein_id "YDL085C-A";
IV	ensembl	start_codon	302668	302670	.	-	0	gene_id "YDL085C-A"; transcript_id "YDL085C-A"; exon_number "1"; gene_source "ensembl"; gene_biotype "protein_coding"; transcript_name "YDL085C-A"; transcript_source "ensembl"; transcript_biotype "protein_coding";
IV	ensembl	stop_codon	302464	302466	.	-	0	gene_id "YDL085C-A"; transcript_id "YDL085C-A"; exon_number "1"; gene_source "ensembl"; gene_biotype "protein_coding"; transcript_name "YDL085C-A"; transcript_source "ensembl"; transcript_biotype "protein_coding";
IV	ensembl	gene	303211	304848	.	+	.	gene_id "YDL085W"; gene_name "NDE2"; gene_source "ensembl"; gene_biotype "protein_coding";
IV	ensembl	transcript	303211	304848	.	+	.	gene_id "YDL085W"; transcript_id "YDL085W"; gene_name "NDE2"; gene_source "ensembl"; gene_biotype "protein_coding"; transcript_name "NDE2"; transcript_source "ensembl"; transcript_biotype "protein_coding";
IV	ensembl	exon	303211	304848	.	+	.	gene_id "YDL085W"; transcript_id "YDL085W"; exon_number "1"; gene_name "NDE2"; gene_source "ensembl"; gene_biotype "protein_coding"; transcript_name "NDE2"; transcript_source "ensembl"; transcript_biotype "protein_coding"; exon_id "YDL085W.1";
IV	ensembl	CDS	303211	304845	.	+	0	gene_id "YDL085W"; transcript_id "YDL085W"; exon_number "1"; gene_name "NDE2"; gene_source "ensembl"; gene_biotype "protein_coding"; transcript_name "NDE2"; transcript_source "ensembl"; transcript_biotype "protein_coding"; protein_id "YDL085W";
IV	ensembl	start_codon	303211	303213	.	+	0	gene_id "YDL085W"; transcript_id "YDL085W"; exon_number "1"; gene_name "NDE2"; gene_source "ensembl"; gene_biotype "protein_coding"; transcript_name "NDE2"; transcript_source "ensembl"; transcript_biotype "protein_coding";
IV	ensembl	stop_codon	304846	304848	.	+	0	gene_id "YDL085W"; transcript_id "YDL085W"; exon_number "1"; gene_name "NDE2"; gene_source "ensembl"; gene_biotype "protein_coding"; transcript_name "NDE2"; transcript_source "ensembl"; transcript_biotype "protein_coding";
IV	ensembl	gene	305237	306577	.	+	.	gene_id "YDL084W"; gene_name "SUB2"; gene_source "ensembl"; gene_biotype "protein_coding";
IV	ensembl	transcript	305237	306577	.	+	.	gene_id "YDL084W"; transcript_id "YDL084W"; gene_name "SUB2"; gene_source "ensembl"; gene_biotype "protein_coding"; transcript_name "SUB2"; transcript_source "ensembl"; transcript_biotype "protein_coding";
IV	ensembl	exon	305237	306577	.	+	.	gene_id "YDL084W"; transcript_id "YDL084W"; exon_number "1"; gene_name "SUB2"; gene_source "ensembl"; gene_biotype "protein_coding"; transcript_name "SUB2"; transcript_source "ensembl"; transcript_biotype "protein_coding"; exon_id "YDL084W.1";
IV	ensembl	CDS	305237	306574	.	+	0	gene_id "YDL084W"; transcript_id "YDL084W"; exon_number "1"; gene_name "SUB2"; gene_source "ensembl"; gene_biotype "protein_coding"; transcript_name "SUB2"; transcript_source "ensembl"; transcript_biotype "protein_coding"; protein_id "YDL084W";
IV	ensembl	start_codon	305237	305239	.	+	0	gene_id "YDL084W"; transcript_id "YDL084W"; exon_number "1"; gene_name "SUB2"; gene_source "ensembl"; gene_biotype "protein_coding"; transcript_name "SUB2"; transcript_source "ensembl"; transcript_biotype "protein_coding";
IV	ensembl	stop_codon	306575	306577	.	+	0	gene_id "YDL084W"; transcript_id "YDL084W"; exon_number "1"; gene_name "SUB2"; gene_source "ensembl"; gene_biotype "protein_coding"; transcript_name "SUB2"; transcript_source "ensembl"; transcript_biotype "protein_coding";
IV	ensembl	gene	306926	307789	.	-	.	gene_id "YDL083C"; gene_name "RPS16B"; gene_source "ensembl"; gene_biotype "protein_coding";
IV	ensembl	transcript	306926	307789	.	-	.	gene_id "YDL083C"; transcript_id "YDL083C"; gene_name "RPS16B"; gene_source "ensembl"; gene_biotype "protein_coding"; transcript_name "RPS16B"; transcript_source "ensembl"; transcript_biotype "protein_coding";
IV	ensembl	exon	307766	307789	.	-	.	gene_id "YDL083C"; transcript_id "YDL083C"; exon_number "1"; gene_name "RPS16B"; gene_source "ensembl"; gene_biotype "protein_coding"; transcript_name "RPS16B"; transcript_source "ensembl"; transcript_biotype "protein_coding"; exon_id "YDL083C.1";
IV	ensembl	CDS	307766	307789	.	-	0	gene_id "YDL083C"; transcript_id "YDL083C"; exon_number "1"; gene_name "RPS16B"; gene_source "ensembl"; gene_biotype "protein_coding"; transcript_name "RPS16B"; transcript_source "ensembl"; transcript_biotype "protein_coding"; protein_id "YDL083C";
IV	ensembl	start_codon	307787	307789	.	-	0	gene_id "YDL083C"; transcript_id "YDL083C"; exon_number "1"; gene_name "RPS16B"; gene_source "ensembl"; gene_biotype "protein_coding"; transcript_name "RPS16B"; transcript_source "ensembl"; transcript_biotype "protein_coding";
IV	ensembl	exon	306926	307333	.	-	.	gene_id "YDL083C"; transcript_id "YDL083C"; exon_number "2"; gene_name "RPS16B"; gene_source "ensembl"; gene_biotype "protein_coding"; transcript_name "RPS16B"; transcript_source "ensembl"; transcript_biotype "protein_coding"; exon_id "YDL083C.2";
IV	ensembl	CDS	306929	307333	.	-	0	gene_id "YDL083C"; transcript_id "YDL083C"; exon_number "2"; gene_name "RPS16B"; gene_source "ensembl"; gene_biotype "protein_coding"; transcript_name "RPS16B"; transcript_source "ensembl"; transcript_biotype "protein_coding"; protein_id "YDL083C";
IV	ensembl	stop_codon	306926	306928	.	-	0	gene_id "YDL083C"; transcript_id "YDL083C"; exon_number "2"; gene_name "RPS16B"; gene_source "ensembl"; gene_biotype "protein_coding"; transcript_name "RPS16B"; transcript_source "ensembl"; transcript_biotype "protein_coding";
IV	ensembl	gene	308424	309388	.	+	.	gene_id "YDL082W"; gene_name "RPL13A"; gene_source "ensembl"; gene_biotype "protein_coding";
IV	ensembl	transcript	308424	309388	.	+	.	gene_id "YDL082W"; transcript_id "YDL082W"; gene_name "RPL13A"; gene_source "ensembl"; gene_biotype "protein_coding"; transcript_name "RPL13A"; transcript_source "ensembl"; transcript_biotype "protein_coding";
IV	ensembl	exon	308424	308427	.	+	.	gene_id "YDL082W"; transcript_id "YDL082W"; exon_number "1"; gene_name "RPL13A"; gene_source "ensembl"; gene_biotype "protein_coding"; transcript_name "RPL13A"; transcript_source "ensembl"; transcript_biotype "protein_coding"; exon_id "YDL082W.1";
IV	ensembl	CDS	308424	308427	.	+	0	gene_id "YDL082W"; transcript_id "YDL082W"; exon_number "1"; gene_name "RPL13A"; gene_source "ensembl"; gene_biotype "protein_coding"; transcript_name "RPL13A"; transcript_source "ensembl"; transcript_biotype "protein_coding"; protein_id "YDL082W";
IV	ensembl	start_codon	308424	308426	.	+	0	gene_id "YDL082W"; transcript_id "YDL082W"; exon_number "1"; gene_name "RPL13A"; gene_source "ensembl"; gene_biotype "protein_coding"; transcript_name "RPL13A"; transcript_source "ensembl"; transcript_biotype "protein_coding";
IV	ensembl	exon	308793	309388	.	+	.	gene_id "YDL082W"; transcript_id "YDL082W"; exon_number "2"; gene_name "RPL13A"; gene_source "ensembl"; gene_biotype "protein_coding"; transcript_name "RPL13A"; transcript_source "ensembl"; transcript_biotype "protein_coding"; exon_id "YDL082W.2";
IV	ensembl	CDS	308793	309388	.	+	1	gene_id "YDL082W"; transcript_id "YDL082W"; exon_number "2"; gene_name "RPL13A"; gene_source "ensembl"; gene_biotype "protein_coding"; transcript_name "RPL13A"; transcript_source "ensembl"; transcript_biotype "protein_coding"; protein_id "YDL082W";
IV	ensembl	gene	309802	310122	.	-	.	gene_id "YDL081C"; gene_name "RPP1A"; gene_source "ensembl"; gene_biotype "protein_coding";
IV	ensembl	transcript	309802	310122	.	-	.	gene_id "YDL081C"; transcript_id "YDL081C"; gene_name "RPP1A"; gene_source "ensembl"; gene_biotype "protein_coding"; transcript_name "RPP1A"; transcript_source "ensembl"; transcript_biotype "protein_coding";
IV	ensembl	exon	309802	310122	.	-	.	gene_id "YDL081C"; transcript_id "YDL081C"; exon_number "1"; gene_name "RPP1A"; gene_source "ensembl"; gene_biotype "protein_coding"; transcript_name "RPP1A"; transcript_source "ensembl"; transcript_biotype "protein_coding"; exon_id "YDL081C.1";
IV	ensembl	CDS	309805	310122	.	-	0	gene_id "YDL081C"; transcript_id "YDL081C"; exon_number "1"; gene_name "RPP1A"; gene_source "ensembl"; gene_biotype "protein_coding"; transcript_name "RPP1A"; transcript_source "ensembl"; transcript_biotype "protein_coding"; protein_id "YDL081C";
IV	ensembl	start_codon	310120	310122	.	-	0	gene_id "YDL081C"; transcript_id "YDL081C"; exon_number "1"; gene_name "RPP1A"; gene_source "ensembl"; gene_biotype "protein_coding"; transcript_name "RPP1A"; transcript_source "ensembl"; transcript_biotype "protein_coding";
IV	ensembl	stop_codon	309802	309804	.	-	0	gene_id "YDL081C"; transcript_id "YDL081C"; exon_number "1"; gene_name "RPP1A"; gene_source "ensembl"; gene_biotype "protein_coding"; transcript_name "RPP1A"; transcript_source "ensembl"; transcript_biotype "protein_coding";
IV	ensembl	gene	310642	312471	.	-	.	gene_id "YDL080C"; gene_name "THI3"; gene_source "ensembl"; gene_biotype "protein_coding";
IV	ensembl	transcript	310642	312471	.	-	.	gene_id "YDL080C"; transcript_id "YDL080C"; gene_name "THI3"; gene_source "ensembl"; gene_biotype "protein_coding"; transcript_name "THI3"; transcript_source "ensembl"; transcript_biotype "protein_coding";
IV	ensembl	exon	310642	312471	.	-	.	gene_id "YDL080C"; transcript_id "YDL080C"; exon_number "1"; gene_name "THI3"; gene_source "ensembl"; gene_biotype "protein_coding"; transcript_name "THI3"; transcript_source "ensembl"; transcript_biotype "protein_coding"; exon_id "YDL080C.1";
IV	ensembl	CDS	310645	312471	.	-	0	gene_id "YDL080C"; transcript_id "YDL080C"; exon_number "1"; gene_name "THI3"; gene_source "ensembl"; gene_biotype "protein_coding"; transcript_name "THI3"; transcript_source "ensembl"; transcript_biotype "protein_coding"; protein_id "YDL080C";
IV	ensembl	start_codon	312469	312471	.	-	0	gene_id "YDL080C"; transcript_id "YDL080C"; exon_number "1"; gene_name "THI3"; gene_source "ensembl"; gene_biotype "protein_coding"; transcript_name "THI3"; transcript_source "ensembl"; transcript_biotype "protein_coding";
IV	ensembl	stop_codon	310642	310644	.	-	0	gene_id "YDL080C"; transcript_id "YDL080C"; exon_number "1"; gene_name "THI3"; gene_source "ensembl"; gene_biotype "protein_coding"; transcript_name "THI3"; transcript_source "ensembl"; transcript_biotype "protein_coding";
IV	ensembl	gene	312951	314748	.	-	.	gene_id "YDL079C"; gene_name "MRK1"; gene_source "ensembl"; gene_biotype "protein_coding";
IV	ensembl	transcript	312951	314748	.	-	.	gene_id "YDL079C"; transcript_id "YDL079C"; gene_name "MRK1"; gene_source "ensembl"; gene_biotype "protein_coding"; transcript_name "MRK1"; transcript_source "ensembl"; transcript_biotype "protein_coding";
IV	ensembl	exon	314337	314748	.	-	.	gene_id "YDL079C"; transcript_id "YDL079C"; exon_number "1"; gene_name "MRK1"; gene_source "ensembl"; gene_biotype "protein_coding"; transcript_name "MRK1"; transcript_source "ensembl"; transcript_biotype "protein_coding"; exon_id "YDL079C.1";
IV	ensembl	CDS	314337	314748	.	-	0	gene_id "YDL079C"; transcript_id "YDL079C"; exon_number "1"; gene_name "MRK1"; gene_source "ensembl"; gene_biotype "protein_coding"; transcript_name "MRK1"; transcript_source "ensembl"; transcript_biotype "protein_coding"; protein_id "YDL079C";
IV	ensembl	start_codon	314746	314748	.	-	0	gene_id "YDL079C"; transcript_id "YDL079C"; exon_number "1"; gene_name "MRK1"; gene_source "ensembl"; gene_biotype "protein_coding"; transcript_name "MRK1"; transcript_source "ensembl"; transcript_biotype "protein_coding";
IV	ensembl	exon	312951	314044	.	-	.	gene_id "YDL079C"; transcript_id "YDL079C"; exon_number "2"; gene_name "MRK1"; gene_source "ensembl"; gene_biotype "protein_coding"; transcript_name "MRK1"; transcript_source "ensembl"; transcript_biotype "protein_coding"; exon_id "YDL079C.2";
IV	ensembl	CDS	312951	314044	.	-	1	gene_id "YDL079C"; transcript_id "YDL079C"; exon_number "2"; gene_name "MRK1"; gene_source "ensembl"; gene_biotype "protein_coding"; transcript_name "MRK1"; transcript_source "ensembl"; transcript_biotype "protein_coding"; protein_id "YDL079C";
IV	ensembl	gene	315357	316388	.	-	.	gene_id "YDL078C"; gene_name "MDH3"; gene_source "ensembl"; gene_biotype "protein_coding";
IV	ensembl	transcript	315357	316388	.	-	.	gene_id "YDL078C"; transcript_id "YDL078C"; gene_name "MDH3"; gene_source "ensembl"; gene_biotype "protein_coding"; transcript_name "MDH3"; transcript_source "ensembl"; transcript_biotype "protein_coding";
IV	ensembl	exon	315357	316388	.	-	.	gene_id "YDL078C"; transcript_id "YDL078C"; exon_number "1"; gene_name "MDH3"; gene_source "ensembl"; gene_biotype "protein_coding"; transcript_name "MDH3"; transcript_source "ensembl"; transcript_biotype "protein_coding"; exon_id "YDL078C.1";
IV	ensembl	CDS	315360	316388	.	-	0	gene_id "YDL078C"; transcript_id "YDL078C"; exon_number "1"; gene_name "MDH3"; gene_source "ensembl"; gene_biotype "protein_coding"; transcript_name "MDH3"; transcript_source "ensembl"; transcript_biotype "protein_coding"; protein_id "YDL078C";
IV	ensembl	start_codon	316386	316388	.	-	0	gene_id "YDL078C"; transcript_id "YDL078C"; exon_number "1"; gene_name "MDH3"; gene_source "ensembl"; gene_biotype "protein_coding"; transcript_name "MDH3"; transcript_source "ensembl"; transcript_biotype "protein_coding";
IV	ensembl	stop_codon	315357	315359	.	-	0	gene_id "YDL078C"; transcript_id "YDL078C"; exon_number "1"; gene_name "MDH3"; gene_source "ensembl"; gene_biotype "protein_coding"; transcript_name "MDH3"; transcript_source "ensembl"; transcript_biotype "protein_coding";
IV	ensembl	gene	316971	320120	.	-	.	gene_id "YDL077C"; gene_name "VAM6"; gene_source "ensembl"; gene_biotype "protein_coding";
IV	ensembl	transcript	316971	320120	.	-	.	gene_id "YDL077C"; transcript_id "YDL077C"; gene_name "VAM6"; gene_source "ensembl"; gene_biotype "protein_coding"; transcript_name "VAM6"; transcript_source "ensembl"; transcript_biotype "protein_coding";
IV	ensembl	exon	316971	320120	.	-	.	gene_id "YDL077C"; transcript_id "YDL077C"; exon_number "1"; gene_name "VAM6"; gene_source "ensembl"; gene_biotype "protein_coding"; transcript_name "VAM6"; transcript_source "ensembl"; transcript_biotype "protein_coding"; exon_id "YDL077C.1";
IV	ensembl	CDS	316974	320120	.	-	0	gene_id "YDL077C"; transcript_id "YDL077C"; exon_number "1"; gene_name "VAM6"; gene_source "ensembl"; gene_biotype "protein_coding"; transcript_name "VAM6"; transcript_source "ensembl"; transcript_biotype "protein_coding"; protein_id "YDL077C";
IV	ensembl	start_codon	320118	320120	.	-	0	gene_id "YDL077C"; transcript_id "YDL077C"; exon_number "1"; gene_name "VAM6"; gene_source "ensembl"; gene_biotype "protein_coding"; transcript_name "VAM6"; transcript_source "ensembl"; transcript_biotype "protein_coding";
IV	ensembl	stop_codon	316971	316973	.	-	0	gene_id "YDL077C"; transcript_id "YDL077C"; exon_number "1"; gene_name "VAM6"; gene_source "ensembl"; gene_biotype "protein_coding"; transcript_name "VAM6"; transcript_source "ensembl"; transcript_biotype "protein_coding";
IV	ensembl	gene	320668	321552	.	-	.	gene_id "YDL076C"; gene_name "RXT3"; gene_source "ensembl"; gene_biotype "protein_coding";
IV	ensembl	transcript	320668	321552	.	-	.	gene_id "YDL076C"; transcript_id "YDL076C"; gene_name "RXT3"; gene_source "ensembl"; gene_biotype "protein_coding"; transcript_name "RXT3"; transcript_source "ensembl"; transcript_biotype "protein_coding";
IV	ensembl	exon	320668	321552	.	-	.	gene_id "YDL076C"; transcript_id "YDL076C"; exon_number "1"; gene_name "RXT3"; gene_source "ensembl"; gene_biotype "protein_coding"; transcript_name "RXT3"; transcript_source "ensembl"; transcript_biotype "protein_coding"; exon_id "YDL076C.1";
IV	ensembl	CDS	320671	321552	.	-	0	gene_id "YDL076C"; transcript_id "YDL076C"; exon_number "1"; gene_name "RXT3"; gene_source "ensembl"; gene_biotype "protein_coding"; transcript_name "RXT3"; transcript_source "ensembl"; transcript_biotype "protein_coding"; protein_id "YDL076C";
IV	ensembl	start_codon	321550	321552	.	-	0	gene_id "YDL076C"; transcript_id "YDL076C"; exon_number "1"; gene_name "RXT3"; gene_source "ensembl"; gene_biotype "protein_coding"; transcript_name "RXT3"; transcript_source "ensembl"; transcript_biotype "protein_coding";
IV	ensembl	stop_codon	320668	320670	.	-	0	gene_id "YDL076C"; transcript_id "YDL076C"; exon_number "1"; gene_name "RXT3"; gene_source "ensembl"; gene_biotype "protein_coding"; transcript_name "RXT3"; transcript_source "ensembl"; transcript_biotype "protein_coding";
IV	ensembl	gene	322226	322988	.	+	.	gene_id "YDL075W"; gene_name "RPL31A"; gene_source "ensembl"; gene_biotype "protein_coding";
IV	ensembl	transcript	322226	322988	.	+	.	gene_id "YDL075W"; transcript_id "YDL075W"; gene_name "RPL31A"; gene_source "ensembl"; gene_biotype "protein_coding"; transcript_name "RPL31A"; transcript_source "ensembl"; transcript_biotype "protein_coding";
IV	ensembl	exon	322226	322282	.	+	.	gene_id "YDL075W"; transcript_id "YDL075W"; exon_number "1"; gene_name "RPL31A"; gene_source "ensembl"; gene_biotype "protein_coding"; transcript_name "RPL31A"; transcript_source "ensembl"; transcript_biotype "protein_coding"; exon_id "YDL075W.1";
IV	ensembl	CDS	322226	322282	.	+	0	gene_id "YDL075W"; transcript_id "YDL075W"; exon_number "1"; gene_name "RPL31A"; gene_source "ensembl"; gene_biotype "protein_coding"; transcript_name "RPL31A"; transcript_source "ensembl"; transcript_biotype "protein_coding"; protein_id "YDL075W";
IV	ensembl	start_codon	322226	322228	.	+	0	gene_id "YDL075W"; transcript_id "YDL075W"; exon_number "1"; gene_name "RPL31A"; gene_source "ensembl"; gene_biotype "protein_coding"; transcript_name "RPL31A"; transcript_source "ensembl"; transcript_biotype "protein_coding";
IV	ensembl	exon	322704	322988	.	+	.	gene_id "YDL075W"; transcript_id "YDL075W"; exon_number "2"; gene_name "RPL31A"; gene_source "ensembl"; gene_biotype "protein_coding"; transcript_name "RPL31A"; transcript_source "ensembl"; transcript_biotype "protein_coding"; exon_id "YDL075W.2";
IV	ensembl	CDS	322704	322985	.	+	0	gene_id "YDL075W"; transcript_id "YDL075W"; exon_number "2"; gene_name "RPL31A"; gene_source "ensembl"; gene_biotype "protein_coding"; transcript_name "RPL31A"; transcript_source "ensembl"; transcript_biotype "protein_coding"; protein_id "YDL075W";
IV	ensembl	stop_codon	322986	322988	.	+	0	gene_id "YDL075W"; transcript_id "YDL075W"; exon_number "2"; gene_name "RPL31A"; gene_source "ensembl"; gene_biotype "protein_coding"; transcript_name "RPL31A"; transcript_source "ensembl"; transcript_biotype "protein_coding";
IV	ensembl	gene	323217	323471	.	-	.	gene_id "snR63"; gene_name "SNR63"; gene_source "ensembl"; gene_biotype "snoRNA";
IV	ensembl	transcript	323217	323471	.	-	.	gene_id "snR63"; transcript_id "snR63"; gene_name "SNR63"; gene_source "ensembl"; gene_biotype "snoRNA"; transcript_name "SNR63"; transcript_source "ensembl"; transcript_biotype "snoRNA";
IV	ensembl	exon	323217	323471	.	-	.	gene_id "snR63"; transcript_id "snR63"; exon_number "1"; gene_name "SNR63"; gene_source "ensembl"; gene_biotype "snoRNA"; transcript_name "SNR63"; transcript_source "ensembl"; transcript_biotype "snoRNA"; exon_id "snR63.1";
IV	ensembl	gene	324047	326149	.	-	.	gene_id "YDL074C"; gene_name "BRE1"; gene_source "ensembl"; gene_biotype "protein_coding";
IV	ensembl	transcript	324047	326149	.	-	.	gene_id "YDL074C"; transcript_id "YDL074C"; gene_name "BRE1"; gene_source "ensembl"; gene_biotype "protein_coding"; transcript_name "BRE1"; transcript_source "ensembl"; transcript_biotype "protein_coding";
IV	ensembl	exon	324047	326149	.	-	.	gene_id "YDL074C"; transcript_id "YDL074C"; exon_number "1"; gene_name "BRE1"; gene_source "ensembl"; gene_biotype "protein_coding"; transcript_name "BRE1"; transcript_source "ensembl"; transcript_biotype "protein_coding"; exon_id "YDL074C.1";
IV	ensembl	CDS	324050	326149	.	-	0	gene_id "YDL074C"; transcript_id "YDL074C"; exon_number "1"; gene_name "BRE1"; gene_source "ensembl"; gene_biotype "protein_coding"; transcript_name "BRE1"; transcript_source "ensembl"; transcript_biotype "protein_coding"; protein_id "YDL074C";
IV	ensembl	start_codon	326147	326149	.	-	0	gene_id "YDL074C"; transcript_id "YDL074C"; exon_number "1"; gene_name "BRE1"; gene_source "ensembl"; gene_biotype "protein_coding"; transcript_name "BRE1"; transcript_source "ensembl"; transcript_biotype "protein_coding";
IV	ensembl	stop_codon	324047	324049	.	-	0	gene_id "YDL074C"; transcript_id "YDL074C"; exon_number "1"; gene_name "BRE1"; gene_source "ensembl"; gene_biotype "protein_coding"; transcript_name "BRE1"; transcript_source "ensembl"; transcript_biotype "protein_coding";
IV	ensembl	gene	326613	329567	.	+	.	gene_id "YDL073W"; gene_source "ensembl"; gene_biotype "protein_coding";
IV	ensembl	transcript	326613	329567	.	+	.	gene_id "YDL073W"; transcript_id "YDL073W"; gene_source "ensembl"; gene_biotype "protein_coding"; transcript_name "YDL073W"; transcript_source "ensembl"; transcript_biotype "protein_coding";
IV	ensembl	exon	326613	329567	.	+	.	gene_id "YDL073W"; transcript_id "YDL073W"; exon_number "1"; gene_source "ensembl"; gene_biotype "protein_coding"; transcript_name "YDL073W"; transcript_source "ensembl"; transcript_biotype "protein_coding"; exon_id "YDL073W.1";
IV	ensembl	CDS	326613	329564	.	+	0	gene_id "YDL073W"; transcript_id "YDL073W"; exon_number "1"; gene_source "ensembl"; gene_biotype "protein_coding"; transcript_name "YDL073W"; transcript_source "ensembl"; transcript_biotype "protein_coding"; protein_id "YDL073W";
IV	ensembl	start_codon	326613	326615	.	+	0	gene_id "YDL073W"; transcript_id "YDL073W"; exon_number "1"; gene_source "ensembl"; gene_biotype "protein_coding"; transcript_name "YDL073W"; transcript_source "ensembl"; transcript_biotype "protein_coding";
IV	ensembl	stop_codon	329565	329567	.	+	0	gene_id "YDL073W"; transcript_id "YDL073W"; exon_number "1"; gene_source "ensembl"; gene_biotype "protein_coding"; transcript_name "YDL073W"; transcript_source "ensembl"; transcript_biotype "protein_coding";
IV	ensembl	gene	329836	330447	.	-	.	gene_id "YDL072C"; gene_name "YET3"; gene_source "ensembl"; gene_biotype "protein_coding";
IV	ensembl	transcript	329836	330447	.	-	.	gene_id "YDL072C"; transcript_id "YDL072C"; gene_name "YET3"; gene_source "ensembl"; gene_biotype "protein_coding"; transcript_name "YET3"; transcript_source "ensembl"; transcript_biotype "protein_coding";
IV	ensembl	exon	329836	330447	.	-	.	gene_id "YDL072C"; transcript_id "YDL072C"; exon_number "1"; gene_name "YET3"; gene_source "ensembl"; gene_biotype "protein_coding"; transcript_name "YET3"; transcript_source "ensembl"; transcript_biotype "protein_coding"; exon_id "YDL072C.1";
IV	ensembl	CDS	329839	330447	.	-	0	gene_id "YDL072C"; transcript_id "YDL072C"; exon_number "1"; gene_name "YET3"; gene_source "ensembl"; gene_biotype "protein_coding"; transcript_name "YET3"; transcript_source "ensembl"; transcript_biotype "protein_coding"; protein_id "YDL072C";
IV	ensembl	start_codon	330445	330447	.	-	0	gene_id "YDL072C"; transcript_id "YDL072C"; exon_number "1"; gene_name "YET3"; gene_source "ensembl"; gene_biotype "protein_coding"; transcript_name "YET3"; transcript_source "ensembl"; transcript_biotype "protein_coding";
IV	ensembl	stop_codon	329836	329838	.	-	0	gene_id "YDL072C"; transcript_id "YDL072C"; exon_number "1"; gene_name "YET3"; gene_source "ensembl"; gene_biotype "protein_coding"; transcript_name "YET3"; transcript_source "ensembl"; transcript_biotype "protein_coding";
IV	ensembl	gene	330666	331040	.	-	.	gene_id "YDL071C"; gene_source "ensembl"; gene_biotype "protein_coding";
IV	ensembl	transcript	330666	331040	.	-	.	gene_id "YDL071C"; transcript_id "YDL071C"; gene_source "ensembl"; gene_biotype "protein_coding"; transcript_name "YDL071C"; transcript_source "ensembl"; transcript_biotype "protein_coding";
IV	ensembl	exon	330666	331040	.	-	.	gene_id "YDL071C"; transcript_id "YDL071C"; exon_number "1"; gene_source "ensembl"; gene_biotype "protein_coding"; transcript_name "YDL071C"; transcript_source "ensembl"; transcript_biotype "protein_coding"; exon_id "YDL071C.1";
IV	ensembl	CDS	330669	331040	.	-	0	gene_id "YDL071C"; transcript_id "YDL071C"; exon_number "1"; gene_source "ensembl"; gene_biotype "protein_coding"; transcript_name "YDL071C"; transcript_source "ensembl"; transcript_biotype "protein_coding"; protein_id "YDL071C";
IV	ensembl	start_codon	331038	331040	.	-	0	gene_id "YDL071C"; transcript_id "YDL071C"; exon_number "1"; gene_source "ensembl"; gene_biotype "protein_coding"; transcript_name "YDL071C"; transcript_source "ensembl"; transcript_biotype "protein_coding";
IV	ensembl	stop_codon	330666	330668	.	-	0	gene_id "YDL071C"; transcript_id "YDL071C"; exon_number "1"; gene_source "ensembl"; gene_biotype "protein_coding"; transcript_name "YDL071C"; transcript_source "ensembl"; transcript_biotype "protein_coding";
IV	ensembl	gene	331024	332940	.	+	.	gene_id "YDL070W"; gene_name "BDF2"; gene_source "ensembl"; gene_biotype "protein_coding";
IV	ensembl	transcript	331024	332940	.	+	.	gene_id "YDL070W"; transcript_id "YDL070W"; gene_name "BDF2"; gene_source "ensembl"; gene_biotype "protein_coding"; transcript_name "BDF2"; transcript_source "ensembl"; transcript_biotype "protein_coding";
IV	ensembl	exon	331024	332940	.	+	.	gene_id "YDL070W"; transcript_id "YDL070W"; exon_number "1"; gene_name "BDF2"; gene_source "ensembl"; gene_biotype "protein_coding"; transcript_name "BDF2"; transcript_source "ensembl"; transcript_biotype "protein_coding"; exon_id "YDL070W.1";
IV	ensembl	CDS	331024	332937	.	+	0	gene_id "YDL070W"; transcript_id "YDL070W"; exon_number "1"; gene_name "BDF2"; gene_source "ensembl"; gene_biotype "protein_coding"; transcript_name "BDF2"; transcript_source "ensembl"; transcript_biotype "protein_coding"; protein_id "YDL070W";
IV	ensembl	start_codon	331024	331026	.	+	0	gene_id "YDL070W"; transcript_id "YDL070W"; exon_number "1"; gene_name "BDF2"; gene_source "ensembl"; gene_biotype "protein_coding"; transcript_name "BDF2"; transcript_source "ensembl"; transcript_biotype "protein_coding";
IV	ensembl	stop_codon	332938	332940	.	+	0	gene_id "YDL070W"; transcript_id "YDL070W"; exon_number "1"; gene_name "BDF2"; gene_source "ensembl"; gene_biotype "protein_coding"; transcript_name "BDF2"; transcript_source "ensembl"; transcript_biotype "protein_coding";
IV	ensembl	gene	333121	333810	.	-	.	gene_id "YDL069C"; gene_name "CBS1"; gene_source "ensembl"; gene_biotype "protein_coding";
IV	ensembl	transcript	333121	333810	.	-	.	gene_id "YDL069C"; transcript_id "YDL069C"; gene_name "CBS1"; gene_source "ensembl"; gene_biotype "protein_coding"; transcript_name "CBS1"; transcript_source "ensembl"; transcript_biotype "protein_coding";
IV	ensembl	exon	333121	333810	.	-	.	gene_id "YDL069C"; transcript_id "YDL069C"; exon_number "1"; gene_name "CBS1"; gene_source "ensembl"; gene_biotype "protein_coding"; transcript_name "CBS1"; transcript_source "ensembl"; transcript_biotype "protein_coding"; exon_id "YDL069C.1";
IV	ensembl	CDS	333124	333810	.	-	0	gene_id "YDL069C"; transcript_id "YDL069C"; exon_number "1"; gene_name "CBS1"; gene_source "ensembl"; gene_biotype "protein_coding"; transcript_name "CBS1"; transcript_source "ensembl"; transcript_biotype "protein_coding"; protein_id "YDL069C";
IV	ensembl	start_codon	333808	333810	.	-	0	gene_id "YDL069C"; transcript_id "YDL069C"; exon_number "1"; gene_name "CBS1"; gene_source "ensembl"; gene_biotype "protein_coding"; transcript_name "CBS1"; transcript_source "ensembl"; transcript_biotype "protein_coding";
IV	ensembl	stop_codon	333121	333123	.	-	0	gene_id "YDL069C"; transcript_id "YDL069C"; exon_number "1"; gene_name "CBS1"; gene_source "ensembl"; gene_biotype "protein_coding"; transcript_name "CBS1"; transcript_source "ensembl"; transcript_biotype "protein_coding";
IV	ensembl	gene	333500	333829	.	+	.	gene_id "YDL068W"; gene_source "ensembl"; gene_biotype "protein_coding";
IV	ensembl	transcript	333500	333829	.	+	.	gene_id "YDL068W"; transcript_id "YDL068W"; gene_source "ensembl"; gene_biotype "protein_coding"; transcript_name "YDL068W"; transcript_source "ensembl"; transcript_biotype "protein_coding";
IV	ensembl	exon	333500	333829	.	+	.	gene_id "YDL068W"; transcript_id "YDL068W"; exon_number "1"; gene_source "ensembl"; gene_biotype "protein_coding"; transcript_name "YDL068W"; transcript_source "ensembl"; transcript_biotype "protein_coding"; exon_id "YDL068W.1";
IV	ensembl	CDS	333500	333826	.	+	0	gene_id "YDL068W"; transcript_id "YDL068W"; exon_number "1"; gene_source "ensembl"; gene_biotype "protein_coding"; transcript_name "YDL068W"; transcript_source "ensembl"; transcript_biotype "protein_coding"; protein_id "YDL068W";
IV	ensembl	start_codon	333500	333502	.	+	0	gene_id "YDL068W"; transcript_id "YDL068W"; exon_number "1"; gene_source "ensembl"; gene_biotype "protein_coding"; transcript_name "YDL068W"; transcript_source "ensembl"; transcript_biotype "protein_coding";
IV	ensembl	stop_codon	333827	333829	.	+	0	gene_id "YDL068W"; transcript_id "YDL068W"; exon_number "1"; gene_source "ensembl"; gene_biotype "protein_coding"; transcript_name "YDL068W"; transcript_source "ensembl"; transcript_biotype "protein_coding";
IV	ensembl	gene	334217	334396	.	-	.	gene_id "YDL067C"; gene_name "COX9"; gene_source "ensembl"; gene_biotype "protein_coding";
IV	ensembl	transcript	334217	334396	.	-	.	gene_id "YDL067C"; transcript_id "YDL067C"; gene_name "COX9"; gene_source "ensembl"; gene_biotype "protein_coding"; transcript_name "COX9"; transcript_source "ensembl"; transcript_biotype "protein_coding";
IV	ensembl	exon	334217	334396	.	-	.	gene_id "YDL067C"; transcript_id "YDL067C"; exon_number "1"; gene_name "COX9"; gene_source "ensembl"; gene_biotype "protein_coding"; transcript_name "COX9"; transcript_source "ensembl"; transcript_biotype "protein_coding"; exon_id "YDL067C.1";
IV	ensembl	CDS	334220	334396	.	-	0	gene_id "YDL067C"; transcript_id "YDL067C"; exon_number "1"; gene_name "COX9"; gene_source "ensembl"; gene_biotype "protein_coding"; transcript_name "COX9"; transcript_source "ensembl"; transcript_biotype "protein_coding"; protein_id "YDL067C";
IV	ensembl	start_codon	334394	334396	.	-	0	gene_id "YDL067C"; transcript_id "YDL067C"; exon_number "1"; gene_name "COX9"; gene_source "ensembl"; gene_biotype "protein_coding"; transcript_name "COX9"; transcript_source "ensembl"; transcript_biotype "protein_coding";
IV	ensembl	stop_codon	334217	334219	.	-	0	gene_id "YDL067C"; transcript_id "YDL067C"; exon_number "1"; gene_name "COX9"; gene_source "ensembl"; gene_biotype "protein_coding"; transcript_name "COX9"; transcript_source "ensembl"; transcript_biotype "protein_coding";
IV	ensembl	gene	334835	336121	.	+	.	gene_id "YDL066W"; gene_name "IDP1"; gene_source "ensembl"; gene_biotype "protein_coding";
IV	ensembl	transcript	334835	336121	.	+	.	gene_id "YDL066W"; transcript_id "YDL066W"; gene_name "IDP1"; gene_source "ensembl"; gene_biotype "protein_coding"; transcript_name "IDP1"; transcript_source "ensembl"; transcript_biotype "protein_coding";
IV	ensembl	exon	334835	336121	.	+	.	gene_id "YDL066W"; transcript_id "YDL066W"; exon_number "1"; gene_name "IDP1"; gene_source "ensembl"; gene_biotype "protein_coding"; transcript_name "IDP1"; transcript_source "ensembl"; transcript_biotype "protein_coding"; exon_id "YDL066W.1";
IV	ensembl	CDS	334835	336118	.	+	0	gene_id "YDL066W"; transcript_id "YDL066W"; exon_number "1"; gene_name "IDP1"; gene_source "ensembl"; gene_biotype "protein_coding"; transcript_name "IDP1"; transcript_source "ensembl"; transcript_biotype "protein_coding"; protein_id "YDL066W";
IV	ensembl	start_codon	334835	334837	.	+	0	gene_id "YDL066W"; transcript_id "YDL066W"; exon_number "1"; gene_name "IDP1"; gene_source "ensembl"; gene_biotype "protein_coding"; transcript_name "IDP1"; transcript_source "ensembl"; transcript_biotype "protein_coding";
IV	ensembl	stop_codon	336119	336121	.	+	0	gene_id "YDL066W"; transcript_id "YDL066W"; exon_number "1"; gene_name "IDP1"; gene_source "ensembl"; gene_biotype "protein_coding"; transcript_name "IDP1"; transcript_source "ensembl"; transcript_biotype "protein_coding";
IV	ensembl	gene	336249	337277	.	-	.	gene_id "YDL065C"; gene_name "PEX19"; gene_source "ensembl"; gene_biotype "protein_coding";
IV	ensembl	transcript	336249	337277	.	-	.	gene_id "YDL065C"; transcript_id "YDL065C"; gene_name "PEX19"; gene_source "ensembl"; gene_biotype "protein_coding"; transcript_name "PEX19"; transcript_source "ensembl"; transcript_biotype "protein_coding";
IV	ensembl	exon	336249	337277	.	-	.	gene_id "YDL065C"; transcript_id "YDL065C"; exon_number "1"; gene_name "PEX19"; gene_source "ensembl"; gene_biotype "protein_coding"; transcript_name "PEX19"; transcript_source "ensembl"; transcript_biotype "protein_coding"; exon_id "YDL065C.1";
IV	ensembl	CDS	336252	337277	.	-	0	gene_id "YDL065C"; transcript_id "YDL065C"; exon_number "1"; gene_name "PEX19"; gene_source "ensembl"; gene_biotype "protein_coding"; transcript_name "PEX19"; transcript_source "ensembl"; transcript_biotype "protein_coding"; protein_id "YDL065C";
IV	ensembl	start_codon	337275	337277	.	-	0	gene_id "YDL065C"; transcript_id "YDL065C"; exon_number "1"; gene_name "PEX19"; gene_source "ensembl"; gene_biotype "protein_coding"; transcript_name "PEX19"; transcript_source "ensembl"; transcript_biotype "protein_coding";
IV	ensembl	stop_codon	336249	336251	.	-	0	gene_id "YDL065C"; transcript_id "YDL065C"; exon_number "1"; gene_name "PEX19"; gene_source "ensembl"; gene_biotype "protein_coding"; transcript_name "PEX19"; transcript_source "ensembl"; transcript_biotype "protein_coding";
IV	ensembl	gene	337487	338070	.	+	.	gene_id "YDL064W"; gene_name "UBC9"; gene_source "ensembl"; gene_biotype "protein_coding";
IV	ensembl	transcript	337487	338070	.	+	.	gene_id "YDL064W"; transcript_id "YDL064W"; gene_name "UBC9"; gene_source "ensembl"; gene_biotype "protein_coding"; transcript_name "UBC9"; transcript_source "ensembl"; transcript_biotype "protein_coding";
IV	ensembl	exon	337487	337524	.	+	.	gene_id "YDL064W"; transcript_id "YDL064W"; exon_number "1"; gene_name "UBC9"; gene_source "ensembl"; gene_biotype "protein_coding"; transcript_name "UBC9"; transcript_source "ensembl"; transcript_biotype "protein_coding"; exon_id "YDL064W.1";
IV	ensembl	CDS	337487	337524	.	+	0	gene_id "YDL064W"; transcript_id "YDL064W"; exon_number "1"; gene_name "UBC9"; gene_source "ensembl"; gene_biotype "protein_coding"; transcript_name "UBC9"; transcript_source "ensembl"; transcript_biotype "protein_coding"; protein_id "YDL064W";
IV	ensembl	start_codon	337487	337489	.	+	0	gene_id "YDL064W"; transcript_id "YDL064W"; exon_number "1"; gene_name "UBC9"; gene_source "ensembl"; gene_biotype "protein_coding"; transcript_name "UBC9"; transcript_source "ensembl"; transcript_biotype "protein_coding";
IV	ensembl	exon	337635	338070	.	+	.	gene_id "YDL064W"; transcript_id "YDL064W"; exon_number "2"; gene_name "UBC9"; gene_source "ensembl"; gene_biotype "protein_coding"; transcript_name "UBC9"; transcript_source "ensembl"; transcript_biotype "protein_coding"; exon_id "YDL064W.2";
IV	ensembl	CDS	337635	338070	.	+	2	gene_id "YDL064W"; transcript_id "YDL064W"; exon_number "2"; gene_name "UBC9"; gene_source "ensembl"; gene_biotype "protein_coding"; transcript_name "UBC9"; transcript_source "ensembl"; transcript_biotype "protein_coding"; protein_id "YDL064W";
IV	ensembl	gene	338272	340134	.	-	.	gene_id "YDL063C"; gene_name "SYO1"; gene_source "ensembl"; gene_biotype "protein_coding";
IV	ensembl	transcript	338272	340134	.	-	.	gene_id "YDL063C"; transcript_id "YDL063C"; gene_name "SYO1"; gene_source "ensembl"; gene_biotype "protein_coding"; transcript_name "YDL063C"; transcript_source "ensembl"; transcript_biotype "protein_coding";
IV	ensembl	exon	338272	340134	.	-	.	gene_id "YDL063C"; transcript_id "YDL063C"; exon_number "1"; gene_name "SYO1"; gene_source "ensembl"; gene_biotype "protein_coding"; transcript_name "YDL063C"; transcript_source "ensembl"; transcript_biotype "protein_coding"; exon_id "YDL063C.1";
IV	ensembl	CDS	338275	340134	.	-	0	gene_id "YDL063C"; transcript_id "YDL063C"; exon_number "1"; gene_name "SYO1"; gene_source "ensembl"; gene_biotype "protein_coding"; transcript_name "YDL063C"; transcript_source "ensembl"; transcript_biotype "protein_coding"; protein_id "YDL063C";
IV	ensembl	start_codon	340132	340134	.	-	0	gene_id "YDL063C"; transcript_id "YDL063C"; exon_number "1"; gene_name "SYO1"; gene_source "ensembl"; gene_biotype "protein_coding"; transcript_name "YDL063C"; transcript_source "ensembl"; transcript_biotype "protein_coding";
IV	ensembl	stop_codon	338272	338274	.	-	0	gene_id "YDL063C"; transcript_id "YDL063C"; exon_number "1"; gene_name "SYO1"; gene_source "ensembl"; gene_biotype "protein_coding"; transcript_name "YDL063C"; transcript_source "ensembl"; transcript_biotype "protein_coding";
IV	ensembl	gene	339857	340282	.	+	.	gene_id "YDL062W"; gene_source "ensembl"; gene_biotype "protein_coding";
IV	ensembl	transcript	339857	340282	.	+	.	gene_id "YDL062W"; transcript_id "YDL062W"; gene_source "ensembl"; gene_biotype "protein_coding"; transcript_name "YDL062W"; transcript_source "ensembl"; transcript_biotype "protein_coding";
IV	ensembl	exon	339857	340282	.	+	.	gene_id "YDL062W"; transcript_id "YDL062W"; exon_number "1"; gene_source "ensembl"; gene_biotype "protein_coding"; transcript_name "YDL062W"; transcript_source "ensembl"; transcript_biotype "protein_coding"; exon_id "YDL062W.1";
IV	ensembl	CDS	339857	340279	.	+	0	gene_id "YDL062W"; transcript_id "YDL062W"; exon_number "1"; gene_source "ensembl"; gene_biotype "protein_coding"; transcript_name "YDL062W"; transcript_source "ensembl"; transcript_biotype "protein_coding"; protein_id "YDL062W";
IV	ensembl	start_codon	339857	339859	.	+	0	gene_id "YDL062W"; transcript_id "YDL062W"; exon_number "1"; gene_source "ensembl"; gene_biotype "protein_coding"; transcript_name "YDL062W"; transcript_source "ensembl"; transcript_biotype "protein_coding";
IV	ensembl	stop_codon	340280	340282	.	+	0	gene_id "YDL062W"; transcript_id "YDL062W"; exon_number "1"; gene_source "ensembl"; gene_biotype "protein_coding"; transcript_name "YDL062W"; transcript_source "ensembl"; transcript_biotype "protein_coding";
IV	ensembl	gene	340628	340798	.	-	.	gene_id "YDL061C"; gene_name "RPS29B"; gene_source "ensembl"; gene_biotype "protein_coding";
IV	ensembl	transcript	340628	340798	.	-	.	gene_id "YDL061C"; transcript_id "YDL061C"; gene_name "RPS29B"; gene_source "ensembl"; gene_biotype "protein_coding"; transcript_name "RPS29B"; transcript_source "ensembl"; transcript_biotype "protein_coding";
IV	ensembl	exon	340628	340798	.	-	.	gene_id "YDL061C"; transcript_id "YDL061C"; exon_number "1"; gene_name "RPS29B"; gene_source "ensembl"; gene_biotype "protein_coding"; transcript_name "RPS29B"; transcript_source "ensembl"; transcript_biotype "protein_coding"; exon_id "YDL061C.1";
IV	ensembl	CDS	340631	340798	.	-	0	gene_id "YDL061C"; transcript_id "YDL061C"; exon_number "1"; gene_name "RPS29B"; gene_source "ensembl"; gene_biotype "protein_coding"; transcript_name "RPS29B"; transcript_source "ensembl"; transcript_biotype "protein_coding"; protein_id "YDL061C";
IV	ensembl	start_codon	340796	340798	.	-	0	gene_id "YDL061C"; transcript_id "YDL061C"; exon_number "1"; gene_name "RPS29B"; gene_source "ensembl"; gene_biotype "protein_coding"; transcript_name "RPS29B"; transcript_source "ensembl"; transcript_biotype "protein_coding";
IV	ensembl	stop_codon	340628	340630	.	-	0	gene_id "YDL061C"; transcript_id "YDL061C"; exon_number "1"; gene_name "RPS29B"; gene_source "ensembl"; gene_biotype "protein_coding"; transcript_name "RPS29B"; transcript_source "ensembl"; transcript_biotype "protein_coding";
IV	ensembl	gene	341619	343985	.	+	.	gene_id "YDL060W"; gene_name "TSR1"; gene_source "ensembl"; gene_biotype "protein_coding";
IV	ensembl	transcript	341619	343985	.	+	.	gene_id "YDL060W"; transcript_id "YDL060W"; gene_name "TSR1"; gene_source "ensembl"; gene_biotype "protein_coding"; transcript_name "TSR1"; transcript_source "ensembl"; transcript_biotype "protein_coding";
IV	ensembl	exon	341619	343985	.	+	.	gene_id "YDL060W"; transcript_id "YDL060W"; exon_number "1"; gene_name "TSR1"; gene_source "ensembl"; gene_biotype "protein_coding"; transcript_name "TSR1"; transcript_source "ensembl"; transcript_biotype "protein_coding"; exon_id "YDL060W.1";
IV	ensembl	CDS	341619	343982	.	+	0	gene_id "YDL060W"; transcript_id "YDL060W"; exon_number "1"; gene_name "TSR1"; gene_source "ensembl"; gene_biotype "protein_coding"; transcript_name "TSR1"; transcript_source "ensembl"; transcript_biotype "protein_coding"; protein_id "YDL060W";
IV	ensembl	start_codon	341619	341621	.	+	0	gene_id "YDL060W"; transcript_id "YDL060W"; exon_number "1"; gene_name "TSR1"; gene_source "ensembl"; gene_biotype "protein_coding"; transcript_name "TSR1"; transcript_source "ensembl"; transcript_biotype "protein_coding";
IV	ensembl	stop_codon	343983	343985	.	+	0	gene_id "YDL060W"; transcript_id "YDL060W"; exon_number "1"; gene_name "TSR1"; gene_source "ensembl"; gene_biotype "protein_coding"; transcript_name "TSR1"; transcript_source "ensembl"; transcript_biotype "protein_coding";
IV	ensembl	gene	344237	344953	.	-	.	gene_id "YDL059C"; gene_name "RAD59"; gene_source "ensembl"; gene_biotype "protein_coding";
IV	ensembl	transcript	344237	344953	.	-	.	gene_id "YDL059C"; transcript_id "YDL059C"; gene_name "RAD59"; gene_source "ensembl"; gene_biotype "protein_coding"; transcript_name "RAD59"; transcript_source "ensembl"; transcript_biotype "protein_coding";
IV	ensembl	exon	344237	344953	.	-	.	gene_id "YDL059C"; transcript_id "YDL059C"; exon_number "1"; gene_name "RAD59"; gene_source "ensembl"; gene_biotype "protein_coding"; transcript_name "RAD59"; transcript_source "ensembl"; transcript_biotype "protein_coding"; exon_id "YDL059C.1";
IV	ensembl	CDS	344240	344953	.	-	0	gene_id "YDL059C"; transcript_id "YDL059C"; exon_number "1"; gene_name "RAD59"; gene_source "ensembl"; gene_biotype "protein_coding"; transcript_name "RAD59"; transcript_source "ensembl"; transcript_biotype "protein_coding"; protein_id "YDL059C";
IV	ensembl	start_codon	344951	344953	.	-	0	gene_id "YDL059C"; transcript_id "YDL059C"; exon_number "1"; gene_name "RAD59"; gene_source "ensembl"; gene_biotype "protein_coding"; transcript_name "RAD59"; transcript_source "ensembl"; transcript_biotype "protein_coding";
IV	ensembl	stop_codon	344237	344239	.	-	0	gene_id "YDL059C"; transcript_id "YDL059C"; exon_number "1"; gene_name "RAD59"; gene_source "ensembl"; gene_biotype "protein_coding"; transcript_name "RAD59"; transcript_source "ensembl"; transcript_biotype "protein_coding";
IV	ensembl	gene	345665	351037	.	+	.	gene_id "YDL058W"; gene_name "USO1"; gene_source "ensembl"; gene_biotype "protein_coding";
IV	ensembl	transcript	345665	351037	.	+	.	gene_id "YDL058W"; transcript_id "YDL058W"; gene_name "USO1"; gene_source "ensembl"; gene_biotype "protein_coding"; transcript_name "USO1"; transcript_source "ensembl"; transcript_biotype "protein_coding";
IV	ensembl	exon	345665	351037	.	+	.	gene_id "YDL058W"; transcript_id "YDL058W"; exon_number "1"; gene_name "USO1"; gene_source "ensembl"; gene_biotype "protein_coding"; transcript_name "USO1"; transcript_source "ensembl"; transcript_biotype "protein_coding"; exon_id "YDL058W.1";
IV	ensembl	CDS	345665	351034	.	+	0	gene_id "YDL058W"; transcript_id "YDL058W"; exon_number "1"; gene_name "USO1"; gene_source "ensembl"; gene_biotype "protein_coding"; transcript_name "USO1"; transcript_source "ensembl"; transcript_biotype "protein_coding"; protein_id "YDL058W";
IV	ensembl	start_codon	345665	345667	.	+	0	gene_id "YDL058W"; transcript_id "YDL058W"; exon_number "1"; gene_name "USO1"; gene_source "ensembl"; gene_biotype "protein_coding"; transcript_name "USO1"; transcript_source "ensembl"; transcript_biotype "protein_coding";
IV	ensembl	stop_codon	351035	351037	.	+	0	gene_id "YDL058W"; transcript_id "YDL058W"; exon_number "1"; gene_name "USO1"; gene_source "ensembl"; gene_biotype "protein_coding"; transcript_name "USO1"; transcript_source "ensembl"; transcript_biotype "protein_coding";
IV	ensembl	gene	351434	352420	.	+	.	gene_id "YDL057W"; gene_source "ensembl"; gene_biotype "protein_coding";
IV	ensembl	transcript	351434	352420	.	+	.	gene_id "YDL057W"; transcript_id "YDL057W"; gene_source "ensembl"; gene_biotype "protein_coding"; transcript_name "YDL057W"; transcript_source "ensembl"; transcript_biotype "protein_coding";
IV	ensembl	exon	351434	352420	.	+	.	gene_id "YDL057W"; transcript_id "YDL057W"; exon_number "1"; gene_source "ensembl"; gene_biotype "protein_coding"; transcript_name "YDL057W"; transcript_source "ensembl"; transcript_biotype "protein_coding"; exon_id "YDL057W.1";
IV	ensembl	CDS	351434	352417	.	+	0	gene_id "YDL057W"; transcript_id "YDL057W"; exon_number "1"; gene_source "ensembl"; gene_biotype "protein_coding"; transcript_name "YDL057W"; transcript_source "ensembl"; transcript_biotype "protein_coding"; protein_id "YDL057W";
IV	ensembl	start_codon	351434	351436	.	+	0	gene_id "YDL057W"; transcript_id "YDL057W"; exon_number "1"; gene_source "ensembl"; gene_biotype "protein_coding"; transcript_name "YDL057W"; transcript_source "ensembl"; transcript_biotype "protein_coding";
IV	ensembl	stop_codon	352418	352420	.	+	0	gene_id "YDL057W"; transcript_id "YDL057W"; exon_number "1"; gene_source "ensembl"; gene_biotype "protein_coding"; transcript_name "YDL057W"; transcript_source "ensembl"; transcript_biotype "protein_coding";
IV	ensembl	gene	352877	355378	.	+	.	gene_id "YDL056W"; gene_name "MBP1"; gene_source "ensembl"; gene_biotype "protein_coding";
IV	ensembl	transcript	352877	355378	.	+	.	gene_id "YDL056W"; transcript_id "YDL056W"; gene_name "MBP1"; gene_source "ensembl"; gene_biotype "protein_coding"; transcript_name "MBP1"; transcript_source "ensembl"; transcript_biotype "protein_coding";
IV	ensembl	exon	352877	355378	.	+	.	gene_id "YDL056W"; transcript_id "YDL056W"; exon_number "1"; gene_name "MBP1"; gene_source "ensembl"; gene_biotype "protein_coding"; transcript_name "MBP1"; transcript_source "ensembl"; transcript_biotype "protein_coding"; exon_id "YDL056W.1";
IV	ensembl	CDS	352877	355375	.	+	0	gene_id "YDL056W"; transcript_id "YDL056W"; exon_number "1"; gene_name "MBP1"; gene_source "ensembl"; gene_biotype "protein_coding"; transcript_name "MBP1"; transcript_source "ensembl"; transcript_biotype "protein_coding"; protein_id "YDL056W";
IV	ensembl	start_codon	352877	352879	.	+	0	gene_id "YDL056W"; transcript_id "YDL056W"; exon_number "1"; gene_name "MBP1"; gene_source "ensembl"; gene_biotype "protein_coding"; transcript_name "MBP1"; transcript_source "ensembl"; transcript_biotype "protein_coding";
IV	ensembl	stop_codon	355376	355378	.	+	0	gene_id "YDL056W"; transcript_id "YDL056W"; exon_number "1"; gene_name "MBP1"; gene_source "ensembl"; gene_biotype "protein_coding"; transcript_name "MBP1"; transcript_source "ensembl"; transcript_biotype "protein_coding";
IV	ensembl	gene	355674	356759	.	-	.	gene_id "YDL055C"; gene_name "PSA1"; gene_source "ensembl"; gene_biotype "protein_coding";
IV	ensembl	transcript	355674	356759	.	-	.	gene_id "YDL055C"; transcript_id "YDL055C"; gene_name "PSA1"; gene_source "ensembl"; gene_biotype "protein_coding"; transcript_name "PSA1"; transcript_source "ensembl"; transcript_biotype "protein_coding";
IV	ensembl	exon	355674	356759	.	-	.	gene_id "YDL055C"; transcript_id "YDL055C"; exon_number "1"; gene_name "PSA1"; gene_source "ensembl"; gene_biotype "protein_coding"; transcript_name "PSA1"; transcript_source "ensembl"; transcript_biotype "protein_coding"; exon_id "YDL055C.1";
IV	ensembl	CDS	355677	356759	.	-	0	gene_id "YDL055C"; transcript_id "YDL055C"; exon_number "1"; gene_name "PSA1"; gene_source "ensembl"; gene_biotype "protein_coding"; transcript_name "PSA1"; transcript_source "ensembl"; transcript_biotype "protein_coding"; protein_id "YDL055C";
IV	ensembl	start_codon	356757	356759	.	-	0	gene_id "YDL055C"; transcript_id "YDL055C"; exon_number "1"; gene_name "PSA1"; gene_source "ensembl"; gene_biotype "protein_coding"; transcript_name "PSA1"; transcript_source "ensembl"; transcript_biotype "protein_coding";
IV	ensembl	stop_codon	355674	355676	.	-	0	gene_id "YDL055C"; transcript_id "YDL055C"; exon_number "1"; gene_name "PSA1"; gene_source "ensembl"; gene_biotype "protein_coding"; transcript_name "PSA1"; transcript_source "ensembl"; transcript_biotype "protein_coding";
IV	ensembl	gene	359577	359672	.	+	.	gene_id "tK(UUU)D"; gene_source "ensembl"; gene_biotype "tRNA";
IV	ensembl	transcript	359577	359672	.	+	.	gene_id "tK(UUU)D"; transcript_id "tK(UUU)D"; gene_source "ensembl"; gene_biotype "tRNA"; transcript_name "tK(UUU)D"; transcript_source "ensembl"; transcript_biotype "tRNA";
IV	ensembl	exon	359577	359613	.	+	.	gene_id "tK(UUU)D"; transcript_id "tK(UUU)D"; exon_number "1"; gene_source "ensembl"; gene_biotype "tRNA"; transcript_name "tK(UUU)D"; transcript_source "ensembl"; transcript_biotype "tRNA"; exon_id "tK(UUU)D.1";
IV	ensembl	exon	359637	359672	.	+	.	gene_id "tK(UUU)D"; transcript_id "tK(UUU)D"; exon_number "2"; gene_source "ensembl"; gene_biotype "tRNA"; transcript_name "tK(UUU)D"; transcript_source "ensembl"; transcript_biotype "tRNA"; exon_id "tK(UUU)D.2";
IV	ensembl	gene	359825	361285	.	-	.	gene_id "YDL054C"; gene_name "MCH1"; gene_source "ensembl"; gene_biotype "protein_coding";
IV	ensembl	transcript	359825	361285	.	-	.	gene_id "YDL054C"; transcript_id "YDL054C"; gene_name "MCH1"; gene_source "ensembl"; gene_biotype "protein_coding"; transcript_name "MCH1"; transcript_source "ensembl"; transcript_biotype "protein_coding";
IV	ensembl	exon	359825	361285	.	-	.	gene_id "YDL054C"; transcript_id "YDL054C"; exon_number "1"; gene_name "MCH1"; gene_source "ensembl"; gene_biotype "protein_coding"; transcript_name "MCH1"; transcript_source "ensembl"; transcript_biotype "protein_coding"; exon_id "YDL054C.1";
IV	ensembl	CDS	359828	361285	.	-	0	gene_id "YDL054C"; transcript_id "YDL054C"; exon_number "1"; gene_name "MCH1"; gene_source "ensembl"; gene_biotype "protein_coding"; transcript_name "MCH1"; transcript_source "ensembl"; transcript_biotype "protein_coding"; protein_id "YDL054C";
IV	ensembl	start_codon	361283	361285	.	-	0	gene_id "YDL054C"; transcript_id "YDL054C"; exon_number "1"; gene_name "MCH1"; gene_source "ensembl"; gene_biotype "protein_coding"; transcript_name "MCH1"; transcript_source "ensembl"; transcript_biotype "protein_coding";
IV	ensembl	stop_codon	359825	359827	.	-	0	gene_id "YDL054C"; transcript_id "YDL054C"; exon_number "1"; gene_name "MCH1"; gene_source "ensembl"; gene_biotype "protein_coding"; transcript_name "MCH1"; transcript_source "ensembl"; transcript_biotype "protein_coding";
IV	ensembl	gene	361699	362256	.	-	.	gene_id "YDL053C"; gene_name "PBP4"; gene_source "ensembl"; gene_biotype "protein_coding";
IV	ensembl	transcript	361699	362256	.	-	.	gene_id "YDL053C"; transcript_id "YDL053C"; gene_name "PBP4"; gene_source "ensembl"; gene_biotype "protein_coding"; transcript_name "PBP4"; transcript_source "ensembl"; transcript_biotype "protein_coding";
IV	ensembl	exon	361699	362256	.	-	.	gene_id "YDL053C"; transcript_id "YDL053C"; exon_number "1"; gene_name "PBP4"; gene_source "ensembl"; gene_biotype "protein_coding"; transcript_name "PBP4"; transcript_source "ensembl"; transcript_biotype "protein_coding"; exon_id "YDL053C.1";
IV	ensembl	CDS	361702	362256	.	-	0	gene_id "YDL053C"; transcript_id "YDL053C"; exon_number "1"; gene_name "PBP4"; gene_source "ensembl"; gene_biotype "protein_coding"; transcript_name "PBP4"; transcript_source "ensembl"; transcript_biotype "protein_coding"; protein_id "YDL053C";
IV	ensembl	start_codon	362254	362256	.	-	0	gene_id "YDL053C"; transcript_id "YDL053C"; exon_number "1"; gene_name "PBP4"; gene_source "ensembl"; gene_biotype "protein_coding"; transcript_name "PBP4"; transcript_source "ensembl"; transcript_biotype "protein_coding";
IV	ensembl	stop_codon	361699	361701	.	-	0	gene_id "YDL053C"; transcript_id "YDL053C"; exon_number "1"; gene_name "PBP4"; gene_source "ensembl"; gene_biotype "protein_coding"; transcript_name "PBP4"; transcript_source "ensembl"; transcript_biotype "protein_coding";
IV	ensembl	gene	362672	363583	.	-	.	gene_id "YDL052C"; gene_name "SLC1"; gene_source "ensembl"; gene_biotype "protein_coding";
IV	ensembl	transcript	362672	363583	.	-	.	gene_id "YDL052C"; transcript_id "YDL052C"; gene_name "SLC1"; gene_source "ensembl"; gene_biotype "protein_coding"; transcript_name "SLC1"; transcript_source "ensembl"; transcript_biotype "protein_coding";
IV	ensembl	exon	362672	363583	.	-	.	gene_id "YDL052C"; transcript_id "YDL052C"; exon_number "1"; gene_name "SLC1"; gene_source "ensembl"; gene_biotype "protein_coding"; transcript_name "SLC1"; transcript_source "ensembl"; transcript_biotype "protein_coding"; exon_id "YDL052C.1";
IV	ensembl	CDS	362675	363583	.	-	0	gene_id "YDL052C"; transcript_id "YDL052C"; exon_number "1"; gene_name "SLC1"; gene_source "ensembl"; gene_biotype "protein_coding"; transcript_name "SLC1"; transcript_source "ensembl"; transcript_biotype "protein_coding"; protein_id "YDL052C";
IV	ensembl	start_codon	363581	363583	.	-	0	gene_id "YDL052C"; transcript_id "YDL052C"; exon_number "1"; gene_name "SLC1"; gene_source "ensembl"; gene_biotype "protein_coding"; transcript_name "SLC1"; transcript_source "ensembl"; transcript_biotype "protein_coding";
IV	ensembl	stop_codon	362672	362674	.	-	0	gene_id "YDL052C"; transcript_id "YDL052C"; exon_number "1"; gene_name "SLC1"; gene_source "ensembl"; gene_biotype "protein_coding"; transcript_name "SLC1"; transcript_source "ensembl"; transcript_biotype "protein_coding";
IV	ensembl	gene	363952	364779	.	+	.	gene_id "YDL051W"; gene_name "LHP1"; gene_source "ensembl"; gene_biotype "protein_coding";
IV	ensembl	transcript	363952	364779	.	+	.	gene_id "YDL051W"; transcript_id "YDL051W"; gene_name "LHP1"; gene_source "ensembl"; gene_biotype "protein_coding"; transcript_name "LHP1"; transcript_source "ensembl"; transcript_biotype "protein_coding";
IV	ensembl	exon	363952	364779	.	+	.	gene_id "YDL051W"; transcript_id "YDL051W"; exon_number "1"; gene_name "LHP1"; gene_source "ensembl"; gene_biotype "protein_coding"; transcript_name "LHP1"; transcript_source "ensembl"; transcript_biotype "protein_coding"; exon_id "YDL051W.1";
IV	ensembl	CDS	363952	364776	.	+	0	gene_id "YDL051W"; transcript_id "YDL051W"; exon_number "1"; gene_name "LHP1"; gene_source "ensembl"; gene_biotype "protein_coding"; transcript_name "LHP1"; transcript_source "ensembl"; transcript_biotype "protein_coding"; protein_id "YDL051W";
IV	ensembl	start_codon	363952	363954	.	+	0	gene_id "YDL051W"; transcript_id "YDL051W"; exon_number "1"; gene_name "LHP1"; gene_source "ensembl"; gene_biotype "protein_coding"; transcript_name "LHP1"; transcript_source "ensembl"; transcript_biotype "protein_coding";
IV	ensembl	stop_codon	364777	364779	.	+	0	gene_id "YDL051W"; transcript_id "YDL051W"; exon_number "1"; gene_name "LHP1"; gene_source "ensembl"; gene_biotype "protein_coding"; transcript_name "LHP1"; transcript_source "ensembl"; transcript_biotype "protein_coding";
IV	ensembl	gene	364446	364817	.	-	.	gene_id "YDL050C"; gene_source "ensembl"; gene_biotype "protein_coding";
IV	ensembl	transcript	364446	364817	.	-	.	gene_id "YDL050C"; transcript_id "YDL050C"; gene_source "ensembl"; gene_biotype "protein_coding"; transcript_name "YDL050C"; transcript_source "ensembl"; transcript_biotype "protein_coding";
IV	ensembl	exon	364446	364817	.	-	.	gene_id "YDL050C"; transcript_id "YDL050C"; exon_number "1"; gene_source "ensembl"; gene_biotype "protein_coding"; transcript_name "YDL050C"; transcript_source "ensembl"; transcript_biotype "protein_coding"; exon_id "YDL050C.1";
IV	ensembl	CDS	364449	364817	.	-	0	gene_id "YDL050C"; transcript_id "YDL050C"; exon_number "1"; gene_source "ensembl"; gene_biotype "protein_coding"; transcript_name "YDL050C"; transcript_source "ensembl"; transcript_biotype "protein_coding"; protein_id "YDL050C";
IV	ensembl	start_codon	364815	364817	.	-	0	gene_id "YDL050C"; transcript_id "YDL050C"; exon_number "1"; gene_source "ensembl"; gene_biotype "protein_coding"; transcript_name "YDL050C"; transcript_source "ensembl"; transcript_biotype "protein_coding";
IV	ensembl	stop_codon	364446	364448	.	-	0	gene_id "YDL050C"; transcript_id "YDL050C"; exon_number "1"; gene_source "ensembl"; gene_biotype "protein_coding"; transcript_name "YDL050C"; transcript_source "ensembl"; transcript_biotype "protein_coding";
IV	ensembl	gene	365068	365874	.	-	.	gene_id "YDL049C"; gene_name "KNH1"; gene_source "ensembl"; gene_biotype "protein_coding";
IV	ensembl	transcript	365068	365874	.	-	.	gene_id "YDL049C"; transcript_id "YDL049C"; gene_name "KNH1"; gene_source "ensembl"; gene_biotype "protein_coding"; transcript_name "KNH1"; transcript_source "ensembl"; transcript_biotype "protein_coding";
IV	ensembl	exon	365068	365874	.	-	.	gene_id "YDL049C"; transcript_id "YDL049C"; exon_number "1"; gene_name "KNH1"; gene_source "ensembl"; gene_biotype "protein_coding"; transcript_name "KNH1"; transcript_source "ensembl"; transcript_biotype "protein_coding"; exon_id "YDL049C.1";
IV	ensembl	CDS	365071	365874	.	-	0	gene_id "YDL049C"; transcript_id "YDL049C"; exon_number "1"; gene_name "KNH1"; gene_source "ensembl"; gene_biotype "protein_coding"; transcript_name "KNH1"; transcript_source "ensembl"; transcript_biotype "protein_coding"; protein_id "YDL049C";
IV	ensembl	start_codon	365872	365874	.	-	0	gene_id "YDL049C"; transcript_id "YDL049C"; exon_number "1"; gene_name "KNH1"; gene_source "ensembl"; gene_biotype "protein_coding"; transcript_name "KNH1"; transcript_source "ensembl"; transcript_biotype "protein_coding";
IV	ensembl	stop_codon	365068	365070	.	-	0	gene_id "YDL049C"; transcript_id "YDL049C"; exon_number "1"; gene_name "KNH1"; gene_source "ensembl"; gene_biotype "protein_coding"; transcript_name "KNH1"; transcript_source "ensembl"; transcript_biotype "protein_coding";
IV	ensembl	gene	366739	368211	.	-	.	gene_id "YDL048C"; gene_name "STP4"; gene_source "ensembl"; gene_biotype "protein_coding";
IV	ensembl	transcript	366739	368211	.	-	.	gene_id "YDL048C"; transcript_id "YDL048C"; gene_name "STP4"; gene_source "ensembl"; gene_biotype "protein_coding"; transcript_name "STP4"; transcript_source "ensembl"; transcript_biotype "protein_coding";
IV	ensembl	exon	366739	368211	.	-	.	gene_id "YDL048C"; transcript_id "YDL048C"; exon_number "1"; gene_name "STP4"; gene_source "ensembl"; gene_biotype "protein_coding"; transcript_name "STP4"; transcript_source "ensembl"; transcript_biotype "protein_coding"; exon_id "YDL048C.1";
IV	ensembl	CDS	366742	368211	.	-	0	gene_id "YDL048C"; transcript_id "YDL048C"; exon_number "1"; gene_name "STP4"; gene_source "ensembl"; gene_biotype "protein_coding"; transcript_name "STP4"; transcript_source "ensembl"; transcript_biotype "protein_coding"; protein_id "YDL048C";
IV	ensembl	start_codon	368209	368211	.	-	0	gene_id "YDL048C"; transcript_id "YDL048C"; exon_number "1"; gene_name "STP4"; gene_source "ensembl"; gene_biotype "protein_coding"; transcript_name "STP4"; transcript_source "ensembl"; transcript_biotype "protein_coding";
IV	ensembl	stop_codon	366739	366741	.	-	0	gene_id "YDL048C"; transcript_id "YDL048C"; exon_number "1"; gene_name "STP4"; gene_source "ensembl"; gene_biotype "protein_coding"; transcript_name "STP4"; transcript_source "ensembl"; transcript_biotype "protein_coding";
IV	ensembl	gene	369771	370706	.	+	.	gene_id "YDL047W"; gene_name "SIT4"; gene_source "ensembl"; gene_biotype "protein_coding";
IV	ensembl	transcript	369771	370706	.	+	.	gene_id "YDL047W"; transcript_id "YDL047W"; gene_name "SIT4"; gene_source "ensembl"; gene_biotype "protein_coding"; transcript_name "SIT4"; transcript_source "ensembl"; transcript_biotype "protein_coding";
IV	ensembl	exon	369771	370706	.	+	.	gene_id "YDL047W"; transcript_id "YDL047W"; exon_number "1"; gene_name "SIT4"; gene_source "ensembl"; gene_biotype "protein_coding"; transcript_name "SIT4"; transcript_source "ensembl"; transcript_biotype "protein_coding"; exon_id "YDL047W.1";
IV	ensembl	CDS	369771	370703	.	+	0	gene_id "YDL047W"; transcript_id "YDL047W"; exon_number "1"; gene_name "SIT4"; gene_source "ensembl"; gene_biotype "protein_coding"; transcript_name "SIT4"; transcript_source "ensembl"; transcript_biotype "protein_coding"; protein_id "YDL047W";
IV	ensembl	start_codon	369771	369773	.	+	0	gene_id "YDL047W"; transcript_id "YDL047W"; exon_number "1"; gene_name "SIT4"; gene_source "ensembl"; gene_biotype "protein_coding"; transcript_name "SIT4"; transcript_source "ensembl"; transcript_biotype "protein_coding";
IV	ensembl	stop_codon	370704	370706	.	+	0	gene_id "YDL047W"; transcript_id "YDL047W"; exon_number "1"; gene_name "SIT4"; gene_source "ensembl"; gene_biotype "protein_coding"; transcript_name "SIT4"; transcript_source "ensembl"; transcript_biotype "protein_coding";
IV	ensembl	gene	371240	371761	.	+	.	gene_id "YDL046W"; gene_name "NPC2"; gene_source "ensembl"; gene_biotype "protein_coding";
IV	ensembl	transcript	371240	371761	.	+	.	gene_id "YDL046W"; transcript_id "YDL046W"; gene_name "NPC2"; gene_source "ensembl"; gene_biotype "protein_coding"; transcript_name "NPC2"; transcript_source "ensembl"; transcript_biotype "protein_coding";
IV	ensembl	exon	371240	371761	.	+	.	gene_id "YDL046W"; transcript_id "YDL046W"; exon_number "1"; gene_name "NPC2"; gene_source "ensembl"; gene_biotype "protein_coding"; transcript_name "NPC2"; transcript_source "ensembl"; transcript_biotype "protein_coding"; exon_id "YDL046W.1";
IV	ensembl	CDS	371240	371758	.	+	0	gene_id "YDL046W"; transcript_id "YDL046W"; exon_number "1"; gene_name "NPC2"; gene_source "ensembl"; gene_biotype "protein_coding"; transcript_name "NPC2"; transcript_source "ensembl"; transcript_biotype "protein_coding"; protein_id "YDL046W";
IV	ensembl	start_codon	371240	371242	.	+	0	gene_id "YDL046W"; transcript_id "YDL046W"; exon_number "1"; gene_name "NPC2"; gene_source "ensembl"; gene_biotype "protein_coding"; transcript_name "NPC2"; transcript_source "ensembl"; transcript_biotype "protein_coding";
IV	ensembl	stop_codon	371759	371761	.	+	0	gene_id "YDL046W"; transcript_id "YDL046W"; exon_number "1"; gene_name "NPC2"; gene_source "ensembl"; gene_biotype "protein_coding"; transcript_name "NPC2"; transcript_source "ensembl"; transcript_biotype "protein_coding";
IV	ensembl	gene	372248	372535	.	+	.	gene_id "YDL045W-A"; gene_name "MRP10"; gene_source "ensembl"; gene_biotype "protein_coding";
IV	ensembl	transcript	372248	372535	.	+	.	gene_id "YDL045W-A"; transcript_id "YDL045W-A"; gene_name "MRP10"; gene_source "ensembl"; gene_biotype "protein_coding"; transcript_name "MRP10"; transcript_source "ensembl"; transcript_biotype "protein_coding";
IV	ensembl	exon	372248	372535	.	+	.	gene_id "YDL045W-A"; transcript_id "YDL045W-A"; exon_number "1"; gene_name "MRP10"; gene_source "ensembl"; gene_biotype "protein_coding"; transcript_name "MRP10"; transcript_source "ensembl"; transcript_biotype "protein_coding"; exon_id "YDL045W-A.1";
IV	ensembl	CDS	372248	372532	.	+	0	gene_id "YDL045W-A"; transcript_id "YDL045W-A"; exon_number "1"; gene_name "MRP10"; gene_source "ensembl"; gene_biotype "protein_coding"; transcript_name "MRP10"; transcript_source "ensembl"; transcript_biotype "protein_coding"; protein_id "YDL045W-A";
IV	ensembl	start_codon	372248	372250	.	+	0	gene_id "YDL045W-A"; transcript_id "YDL045W-A"; exon_number "1"; gene_name "MRP10"; gene_source "ensembl"; gene_biotype "protein_coding"; transcript_name "MRP10"; transcript_source "ensembl"; transcript_biotype "protein_coding";
IV	ensembl	stop_codon	372533	372535	.	+	0	gene_id "YDL045W-A"; transcript_id "YDL045W-A"; exon_number "1"; gene_name "MRP10"; gene_source "ensembl"; gene_biotype "protein_coding"; transcript_name "MRP10"; transcript_source "ensembl"; transcript_biotype "protein_coding";
IV	ensembl	gene	372688	373608	.	-	.	gene_id "YDL045C"; gene_name "FAD1"; gene_source "ensembl"; gene_biotype "protein_coding";
IV	ensembl	transcript	372688	373608	.	-	.	gene_id "YDL045C"; transcript_id "YDL045C"; gene_name "FAD1"; gene_source "ensembl"; gene_biotype "protein_coding"; transcript_name "FAD1"; transcript_source "ensembl"; transcript_biotype "protein_coding";
IV	ensembl	exon	372688	373608	.	-	.	gene_id "YDL045C"; transcript_id "YDL045C"; exon_number "1"; gene_name "FAD1"; gene_source "ensembl"; gene_biotype "protein_coding"; transcript_name "FAD1"; transcript_source "ensembl"; transcript_biotype "protein_coding"; exon_id "YDL045C.1";
IV	ensembl	CDS	372691	373608	.	-	0	gene_id "YDL045C"; transcript_id "YDL045C"; exon_number "1"; gene_name "FAD1"; gene_source "ensembl"; gene_biotype "protein_coding"; transcript_name "FAD1"; transcript_source "ensembl"; transcript_biotype "protein_coding"; protein_id "YDL045C";
IV	ensembl	start_codon	373606	373608	.	-	0	gene_id "YDL045C"; transcript_id "YDL045C"; exon_number "1"; gene_name "FAD1"; gene_source "ensembl"; gene_biotype "protein_coding"; transcript_name "FAD1"; transcript_source "ensembl"; transcript_biotype "protein_coding";
IV	ensembl	stop_codon	372688	372690	.	-	0	gene_id "YDL045C"; transcript_id "YDL045C"; exon_number "1"; gene_name "FAD1"; gene_source "ensembl"; gene_biotype "protein_coding"; transcript_name "FAD1"; transcript_source "ensembl"; transcript_biotype "protein_coding";
IV	ensembl	gene	373967	375289	.	-	.	gene_id "YDL044C"; gene_name "MTF2"; gene_source "ensembl"; gene_biotype "protein_coding";
IV	ensembl	transcript	373967	375289	.	-	.	gene_id "YDL044C"; transcript_id "YDL044C"; gene_name "MTF2"; gene_source "ensembl"; gene_biotype "protein_coding"; transcript_name "MTF2"; transcript_source "ensembl"; transcript_biotype "protein_coding";
IV	ensembl	exon	373967	375289	.	-	.	gene_id "YDL044C"; transcript_id "YDL044C"; exon_number "1"; gene_name "MTF2"; gene_source "ensembl"; gene_biotype "protein_coding"; transcript_name "MTF2"; transcript_source "ensembl"; transcript_biotype "protein_coding"; exon_id "YDL044C.1";
IV	ensembl	CDS	373970	375289	.	-	0	gene_id "YDL044C"; transcript_id "YDL044C"; exon_number "1"; gene_name "MTF2"; gene_source "ensembl"; gene_biotype "protein_coding"; transcript_name "MTF2"; transcript_source "ensembl"; transcript_biotype "protein_coding"; protein_id "YDL044C";
IV	ensembl	start_codon	375287	375289	.	-	0	gene_id "YDL044C"; transcript_id "YDL044C"; exon_number "1"; gene_name "MTF2"; gene_source "ensembl"; gene_biotype "protein_coding"; transcript_name "MTF2"; transcript_source "ensembl"; transcript_biotype "protein_coding";
IV	ensembl	stop_codon	373967	373969	.	-	0	gene_id "YDL044C"; transcript_id "YDL044C"; exon_number "1"; gene_name "MTF2"; gene_source "ensembl"; gene_biotype "protein_coding"; transcript_name "MTF2"; transcript_source "ensembl"; transcript_biotype "protein_coding";
IV	ensembl	gene	375680	376480	.	-	.	gene_id "YDL043C"; gene_name "PRP11"; gene_source "ensembl"; gene_biotype "protein_coding";
IV	ensembl	transcript	375680	376480	.	-	.	gene_id "YDL043C"; transcript_id "YDL043C"; gene_name "PRP11"; gene_source "ensembl"; gene_biotype "protein_coding"; transcript_name "PRP11"; transcript_source "ensembl"; transcript_biotype "protein_coding";
IV	ensembl	exon	375680	376480	.	-	.	gene_id "YDL043C"; transcript_id "YDL043C"; exon_number "1"; gene_name "PRP11"; gene_source "ensembl"; gene_biotype "protein_coding"; transcript_name "PRP11"; transcript_source "ensembl"; transcript_biotype "protein_coding"; exon_id "YDL043C.1";
IV	ensembl	CDS	375683	376480	.	-	0	gene_id "YDL043C"; transcript_id "YDL043C"; exon_number "1"; gene_name "PRP11"; gene_source "ensembl"; gene_biotype "protein_coding"; transcript_name "PRP11"; transcript_source "ensembl"; transcript_biotype "protein_coding"; protein_id "YDL043C";
IV	ensembl	start_codon	376478	376480	.	-	0	gene_id "YDL043C"; transcript_id "YDL043C"; exon_number "1"; gene_name "PRP11"; gene_source "ensembl"; gene_biotype "protein_coding"; transcript_name "PRP11"; transcript_source "ensembl"; transcript_biotype "protein_coding";
IV	ensembl	stop_codon	375680	375682	.	-	0	gene_id "YDL043C"; transcript_id "YDL043C"; exon_number "1"; gene_name "PRP11"; gene_source "ensembl"; gene_biotype "protein_coding"; transcript_name "PRP11"; transcript_source "ensembl"; transcript_biotype "protein_coding";
IV	ensembl	gene	376757	378445	.	-	.	gene_id "YDL042C"; gene_name "SIR2"; gene_source "ensembl"; gene_biotype "protein_coding";
IV	ensembl	transcript	376757	378445	.	-	.	gene_id "YDL042C"; transcript_id "YDL042C"; gene_name "SIR2"; gene_source "ensembl"; gene_biotype "protein_coding"; transcript_name "SIR2"; transcript_source "ensembl"; transcript_biotype "protein_coding";
IV	ensembl	exon	376757	378445	.	-	.	gene_id "YDL042C"; transcript_id "YDL042C"; exon_number "1"; gene_name "SIR2"; gene_source "ensembl"; gene_biotype "protein_coding"; transcript_name "SIR2"; transcript_source "ensembl"; transcript_biotype "protein_coding"; exon_id "YDL042C.1";
IV	ensembl	CDS	376760	378445	.	-	0	gene_id "YDL042C"; transcript_id "YDL042C"; exon_number "1"; gene_name "SIR2"; gene_source "ensembl"; gene_biotype "protein_coding"; transcript_name "SIR2"; transcript_source "ensembl"; transcript_biotype "protein_coding"; protein_id "YDL042C";
IV	ensembl	start_codon	378443	378445	.	-	0	gene_id "YDL042C"; transcript_id "YDL042C"; exon_number "1"; gene_name "SIR2"; gene_source "ensembl"; gene_biotype "protein_coding"; transcript_name "SIR2"; transcript_source "ensembl"; transcript_biotype "protein_coding";
IV	ensembl	stop_codon	376757	376759	.	-	0	gene_id "YDL042C"; transcript_id "YDL042C"; exon_number "1"; gene_name "SIR2"; gene_source "ensembl"; gene_biotype "protein_coding"; transcript_name "SIR2"; transcript_source "ensembl"; transcript_biotype "protein_coding";
IV	ensembl	gene	378102	378455	.	+	.	gene_id "YDL041W"; gene_source "ensembl"; gene_biotype "protein_coding";
IV	ensembl	transcript	378102	378455	.	+	.	gene_id "YDL041W"; transcript_id "YDL041W"; gene_source "ensembl"; gene_biotype "protein_coding"; transcript_name "YDL041W"; transcript_source "ensembl"; transcript_biotype "protein_coding";
IV	ensembl	exon	378102	378455	.	+	.	gene_id "YDL041W"; transcript_id "YDL041W"; exon_number "1"; gene_source "ensembl"; gene_biotype "protein_coding"; transcript_name "YDL041W"; transcript_source "ensembl"; transcript_biotype "protein_coding"; exon_id "YDL041W.1";
IV	ensembl	CDS	378102	378452	.	+	0	gene_id "YDL041W"; transcript_id "YDL041W"; exon_number "1"; gene_source "ensembl"; gene_biotype "protein_coding"; transcript_name "YDL041W"; transcript_source "ensembl"; transcript_biotype "protein_coding"; protein_id "YDL041W";
IV	ensembl	start_codon	378102	378104	.	+	0	gene_id "YDL041W"; transcript_id "YDL041W"; exon_number "1"; gene_source "ensembl"; gene_biotype "protein_coding"; transcript_name "YDL041W"; transcript_source "ensembl"; transcript_biotype "protein_coding";
IV	ensembl	stop_codon	378453	378455	.	+	0	gene_id "YDL041W"; transcript_id "YDL041W"; exon_number "1"; gene_source "ensembl"; gene_biotype "protein_coding"; transcript_name "YDL041W"; transcript_source "ensembl"; transcript_biotype "protein_coding";
IV	ensembl	gene	378874	381438	.	-	.	gene_id "YDL040C"; gene_name "NAT1"; gene_source "ensembl"; gene_biotype "protein_coding";
IV	ensembl	transcript	378874	381438	.	-	.	gene_id "YDL040C"; transcript_id "YDL040C"; gene_name "NAT1"; gene_source "ensembl"; gene_biotype "protein_coding"; transcript_name "NAT1"; transcript_source "ensembl"; transcript_biotype "protein_coding";
IV	ensembl	exon	378874	381438	.	-	.	gene_id "YDL040C"; transcript_id "YDL040C"; exon_number "1"; gene_name "NAT1"; gene_source "ensembl"; gene_biotype "protein_coding"; transcript_name "NAT1"; transcript_source "ensembl"; transcript_biotype "protein_coding"; exon_id "YDL040C.1";
IV	ensembl	CDS	378877	381438	.	-	0	gene_id "YDL040C"; transcript_id "YDL040C"; exon_number "1"; gene_name "NAT1"; gene_source "ensembl"; gene_biotype "protein_coding"; transcript_name "NAT1"; transcript_source "ensembl"; transcript_biotype "protein_coding"; protein_id "YDL040C";
IV	ensembl	start_codon	381436	381438	.	-	0	gene_id "YDL040C"; transcript_id "YDL040C"; exon_number "1"; gene_name "NAT1"; gene_source "ensembl"; gene_biotype "protein_coding"; transcript_name "NAT1"; transcript_source "ensembl"; transcript_biotype "protein_coding";
IV	ensembl	stop_codon	378874	378876	.	-	0	gene_id "YDL040C"; transcript_id "YDL040C"; exon_number "1"; gene_name "NAT1"; gene_source "ensembl"; gene_biotype "protein_coding"; transcript_name "NAT1"; transcript_source "ensembl"; transcript_biotype "protein_coding";
IV	ensembl	gene	381985	384081	.	-	.	gene_id "YDL039C"; gene_name "PRM7"; gene_source "ensembl"; gene_biotype "protein_coding";
IV	ensembl	transcript	381985	384081	.	-	.	gene_id "YDL039C"; transcript_id "YDL039C"; gene_name "PRM7"; gene_source "ensembl"; gene_biotype "protein_coding"; transcript_name "PRM7"; transcript_source "ensembl"; transcript_biotype "protein_coding";
IV	ensembl	exon	381985	384081	.	-	.	gene_id "YDL039C"; transcript_id "YDL039C"; exon_number "1"; gene_name "PRM7"; gene_source "ensembl"; gene_biotype "protein_coding"; transcript_name "PRM7"; transcript_source "ensembl"; transcript_biotype "protein_coding"; exon_id "YDL039C.1";
IV	ensembl	CDS	381988	384081	.	-	0	gene_id "YDL039C"; transcript_id "YDL039C"; exon_number "1"; gene_name "PRM7"; gene_source "ensembl"; gene_biotype "protein_coding"; transcript_name "PRM7"; transcript_source "ensembl"; transcript_biotype "protein_coding"; protein_id "YDL039C";
IV	ensembl	start_codon	384079	384081	.	-	0	gene_id "YDL039C"; transcript_id "YDL039C"; exon_number "1"; gene_name "PRM7"; gene_source "ensembl"; gene_biotype "protein_coding"; transcript_name "PRM7"; transcript_source "ensembl"; transcript_biotype "protein_coding";
IV	ensembl	stop_codon	381985	381987	.	-	0	gene_id "YDL039C"; transcript_id "YDL039C"; exon_number "1"; gene_name "PRM7"; gene_source "ensembl"; gene_biotype "protein_coding"; transcript_name "PRM7"; transcript_source "ensembl"; transcript_biotype "protein_coding";
IV	ensembl	gene	384601	385587	.	-	.	gene_id "YDL037C"; gene_name "BSC1"; gene_source "ensembl"; gene_biotype "protein_coding";
IV	ensembl	transcript	384601	385587	.	-	.	gene_id "YDL037C"; transcript_id "YDL037C"; gene_name "BSC1"; gene_source "ensembl"; gene_biotype "protein_coding"; transcript_name "BSC1"; transcript_source "ensembl"; transcript_biotype "protein_coding";
IV	ensembl	exon	384601	385587	.	-	.	gene_id "YDL037C"; transcript_id "YDL037C"; exon_number "1"; gene_name "BSC1"; gene_source "ensembl"; gene_biotype "protein_coding"; transcript_name "BSC1"; transcript_source "ensembl"; transcript_biotype "protein_coding"; exon_id "YDL037C.1";
IV	ensembl	CDS	384604	385587	.	-	0	gene_id "YDL037C"; transcript_id "YDL037C"; exon_number "1"; gene_name "BSC1"; gene_source "ensembl"; gene_biotype "protein_coding"; transcript_name "BSC1"; transcript_source "ensembl"; transcript_biotype "protein_coding"; protein_id "YDL037C";
IV	ensembl	start_codon	385585	385587	.	-	0	gene_id "YDL037C"; transcript_id "YDL037C"; exon_number "1"; gene_name "BSC1"; gene_source "ensembl"; gene_biotype "protein_coding"; transcript_name "BSC1"; transcript_source "ensembl"; transcript_biotype "protein_coding";
IV	ensembl	stop_codon	384601	384603	.	-	0	gene_id "YDL037C"; transcript_id "YDL037C"; exon_number "1"; gene_name "BSC1"; gene_source "ensembl"; gene_biotype "protein_coding"; transcript_name "BSC1"; transcript_source "ensembl"; transcript_biotype "protein_coding";
IV	ensembl	gene	387513	388901	.	-	.	gene_id "YDL036C"; gene_name "PUS9"; gene_source "ensembl"; gene_biotype "protein_coding";
IV	ensembl	transcript	387513	388901	.	-	.	gene_id "YDL036C"; transcript_id "YDL036C"; gene_name "PUS9"; gene_source "ensembl"; gene_biotype "protein_coding"; transcript_name "PUS9"; transcript_source "ensembl"; transcript_biotype "protein_coding";
IV	ensembl	exon	387513	388901	.	-	.	gene_id "YDL036C"; transcript_id "YDL036C"; exon_number "1"; gene_name "PUS9"; gene_source "ensembl"; gene_biotype "protein_coding"; transcript_name "PUS9"; transcript_source "ensembl"; transcript_biotype "protein_coding"; exon_id "YDL036C.1";
IV	ensembl	CDS	387516	388901	.	-	0	gene_id "YDL036C"; transcript_id "YDL036C"; exon_number "1"; gene_name "PUS9"; gene_source "ensembl"; gene_biotype "protein_coding"; transcript_name "PUS9"; transcript_source "ensembl"; transcript_biotype "protein_coding"; protein_id "YDL036C";
IV	ensembl	start_codon	388899	388901	.	-	0	gene_id "YDL036C"; transcript_id "YDL036C"; exon_number "1"; gene_name "PUS9"; gene_source "ensembl"; gene_biotype "protein_coding"; transcript_name "PUS9"; transcript_source "ensembl"; transcript_biotype "protein_coding";
IV	ensembl	stop_codon	387513	387515	.	-	0	gene_id "YDL036C"; transcript_id "YDL036C"; exon_number "1"; gene_name "PUS9"; gene_source "ensembl"; gene_biotype "protein_coding"; transcript_name "PUS9"; transcript_source "ensembl"; transcript_biotype "protein_coding";
IV	ensembl	gene	389172	392057	.	-	.	gene_id "YDL035C"; gene_name "GPR1"; gene_source "ensembl"; gene_biotype "protein_coding";
IV	ensembl	transcript	389172	392057	.	-	.	gene_id "YDL035C"; transcript_id "YDL035C"; gene_name "GPR1"; gene_source "ensembl"; gene_biotype "protein_coding"; transcript_name "GPR1"; transcript_source "ensembl"; transcript_biotype "protein_coding";
IV	ensembl	exon	389172	392057	.	-	.	gene_id "YDL035C"; transcript_id "YDL035C"; exon_number "1"; gene_name "GPR1"; gene_source "ensembl"; gene_biotype "protein_coding"; transcript_name "GPR1"; transcript_source "ensembl"; transcript_biotype "protein_coding"; exon_id "YDL035C.1";
IV	ensembl	CDS	389175	392057	.	-	0	gene_id "YDL035C"; transcript_id "YDL035C"; exon_number "1"; gene_name "GPR1"; gene_source "ensembl"; gene_biotype "protein_coding"; transcript_name "GPR1"; transcript_source "ensembl"; transcript_biotype "protein_coding"; protein_id "YDL035C";
IV	ensembl	start_codon	392055	392057	.	-	0	gene_id "YDL035C"; transcript_id "YDL035C"; exon_number "1"; gene_name "GPR1"; gene_source "ensembl"; gene_biotype "protein_coding"; transcript_name "GPR1"; transcript_source "ensembl"; transcript_biotype "protein_coding";
IV	ensembl	stop_codon	389172	389174	.	-	0	gene_id "YDL035C"; transcript_id "YDL035C"; exon_number "1"; gene_name "GPR1"; gene_source "ensembl"; gene_biotype "protein_coding"; transcript_name "GPR1"; transcript_source "ensembl"; transcript_biotype "protein_coding";
IV	ensembl	gene	391783	392127	.	+	.	gene_id "YDL034W"; gene_source "ensembl"; gene_biotype "protein_coding";
IV	ensembl	transcript	391783	392127	.	+	.	gene_id "YDL034W"; transcript_id "YDL034W"; gene_source "ensembl"; gene_biotype "protein_coding"; transcript_name "YDL034W"; transcript_source "ensembl"; transcript_biotype "protein_coding";
IV	ensembl	exon	391783	392127	.	+	.	gene_id "YDL034W"; transcript_id "YDL034W"; exon_number "1"; gene_source "ensembl"; gene_biotype "protein_coding"; transcript_name "YDL034W"; transcript_source "ensembl"; transcript_biotype "protein_coding"; exon_id "YDL034W.1";
IV	ensembl	CDS	391783	392124	.	+	0	gene_id "YDL034W"; transcript_id "YDL034W"; exon_number "1"; gene_source "ensembl"; gene_biotype "protein_coding"; transcript_name "YDL034W"; transcript_source "ensembl"; transcript_biotype "protein_coding"; protein_id "YDL034W";
IV	ensembl	start_codon	391783	391785	.	+	0	gene_id "YDL034W"; transcript_id "YDL034W"; exon_number "1"; gene_source "ensembl"; gene_biotype "protein_coding"; transcript_name "YDL034W"; transcript_source "ensembl"; transcript_biotype "protein_coding";
IV	ensembl	stop_codon	392125	392127	.	+	0	gene_id "YDL034W"; transcript_id "YDL034W"; exon_number "1"; gene_source "ensembl"; gene_biotype "protein_coding"; transcript_name "YDL034W"; transcript_source "ensembl"; transcript_biotype "protein_coding";
IV	ensembl	gene	392659	393912	.	-	.	gene_id "YDL033C"; gene_name "SLM3"; gene_source "ensembl"; gene_biotype "protein_coding";
IV	ensembl	transcript	392659	393912	.	-	.	gene_id "YDL033C"; transcript_id "YDL033C"; gene_name "SLM3"; gene_source "ensembl"; gene_biotype "protein_coding"; transcript_name "SLM3"; transcript_source "ensembl"; transcript_biotype "protein_coding";
IV	ensembl	exon	392659	393912	.	-	.	gene_id "YDL033C"; transcript_id "YDL033C"; exon_number "1"; gene_name "SLM3"; gene_source "ensembl"; gene_biotype "protein_coding"; transcript_name "SLM3"; transcript_source "ensembl"; transcript_biotype "protein_coding"; exon_id "YDL033C.1";
IV	ensembl	CDS	392662	393912	.	-	0	gene_id "YDL033C"; transcript_id "YDL033C"; exon_number "1"; gene_name "SLM3"; gene_source "ensembl"; gene_biotype "protein_coding"; transcript_name "SLM3"; transcript_source "ensembl"; transcript_biotype "protein_coding"; protein_id "YDL033C";
IV	ensembl	start_codon	393910	393912	.	-	0	gene_id "YDL033C"; transcript_id "YDL033C"; exon_number "1"; gene_name "SLM3"; gene_source "ensembl"; gene_biotype "protein_coding"; transcript_name "SLM3"; transcript_source "ensembl"; transcript_biotype "protein_coding";
IV	ensembl	stop_codon	392659	392661	.	-	0	gene_id "YDL033C"; transcript_id "YDL033C"; exon_number "1"; gene_name "SLM3"; gene_source "ensembl"; gene_biotype "protein_coding"; transcript_name "SLM3"; transcript_source "ensembl"; transcript_biotype "protein_coding";
IV	ensembl	gene	393690	394001	.	+	.	gene_id "YDL032W"; gene_source "ensembl"; gene_biotype "protein_coding";
IV	ensembl	transcript	393690	394001	.	+	.	gene_id "YDL032W"; transcript_id "YDL032W"; gene_source "ensembl"; gene_biotype "protein_coding"; transcript_name "YDL032W"; transcript_source "ensembl"; transcript_biotype "protein_coding";
IV	ensembl	exon	393690	394001	.	+	.	gene_id "YDL032W"; transcript_id "YDL032W"; exon_number "1"; gene_source "ensembl"; gene_biotype "protein_coding"; transcript_name "YDL032W"; transcript_source "ensembl"; transcript_biotype "protein_coding"; exon_id "YDL032W.1";
IV	ensembl	CDS	393690	393998	.	+	0	gene_id "YDL032W"; transcript_id "YDL032W"; exon_number "1"; gene_source "ensembl"; gene_biotype "protein_coding"; transcript_name "YDL032W"; transcript_source "ensembl"; transcript_biotype "protein_coding"; protein_id "YDL032W";
IV	ensembl	start_codon	393690	393692	.	+	0	gene_id "YDL032W"; transcript_id "YDL032W"; exon_number "1"; gene_source "ensembl"; gene_biotype "protein_coding"; transcript_name "YDL032W"; transcript_source "ensembl"; transcript_biotype "protein_coding";
IV	ensembl	stop_codon	393999	394001	.	+	0	gene_id "YDL032W"; transcript_id "YDL032W"; exon_number "1"; gene_source "ensembl"; gene_biotype "protein_coding"; transcript_name "YDL032W"; transcript_source "ensembl"; transcript_biotype "protein_coding";
IV	ensembl	gene	394217	397204	.	+	.	gene_id "YDL031W"; gene_name "DBP10"; gene_source "ensembl"; gene_biotype "protein_coding";
IV	ensembl	transcript	394217	397204	.	+	.	gene_id "YDL031W"; transcript_id "YDL031W"; gene_name "DBP10"; gene_source "ensembl"; gene_biotype "protein_coding"; transcript_name "DBP10"; transcript_source "ensembl"; transcript_biotype "protein_coding";
IV	ensembl	exon	394217	397204	.	+	.	gene_id "YDL031W"; transcript_id "YDL031W"; exon_number "1"; gene_name "DBP10"; gene_source "ensembl"; gene_biotype "protein_coding"; transcript_name "DBP10"; transcript_source "ensembl"; transcript_biotype "protein_coding"; exon_id "YDL031W.1";
IV	ensembl	CDS	394217	397201	.	+	0	gene_id "YDL031W"; transcript_id "YDL031W"; exon_number "1"; gene_name "DBP10"; gene_source "ensembl"; gene_biotype "protein_coding"; transcript_name "DBP10"; transcript_source "ensembl"; transcript_biotype "protein_coding"; protein_id "YDL031W";
IV	ensembl	start_codon	394217	394219	.	+	0	gene_id "YDL031W"; transcript_id "YDL031W"; exon_number "1"; gene_name "DBP10"; gene_source "ensembl"; gene_biotype "protein_coding"; transcript_name "DBP10"; transcript_source "ensembl"; transcript_biotype "protein_coding";
IV	ensembl	stop_codon	397202	397204	.	+	0	gene_id "YDL031W"; transcript_id "YDL031W"; exon_number "1"; gene_name "DBP10"; gene_source "ensembl"; gene_biotype "protein_coding"; transcript_name "DBP10"; transcript_source "ensembl"; transcript_biotype "protein_coding";
IV	ensembl	gene	397537	399129	.	+	.	gene_id "YDL030W"; gene_name "PRP9"; gene_source "ensembl"; gene_biotype "protein_coding";
IV	ensembl	transcript	397537	399129	.	+	.	gene_id "YDL030W"; transcript_id "YDL030W"; gene_name "PRP9"; gene_source "ensembl"; gene_biotype "protein_coding"; transcript_name "PRP9"; transcript_source "ensembl"; transcript_biotype "protein_coding";
IV	ensembl	exon	397537	399129	.	+	.	gene_id "YDL030W"; transcript_id "YDL030W"; exon_number "1"; gene_name "PRP9"; gene_source "ensembl"; gene_biotype "protein_coding"; transcript_name "PRP9"; transcript_source "ensembl"; transcript_biotype "protein_coding"; exon_id "YDL030W.1";
IV	ensembl	CDS	397537	399126	.	+	0	gene_id "YDL030W"; transcript_id "YDL030W"; exon_number "1"; gene_name "PRP9"; gene_source "ensembl"; gene_biotype "protein_coding"; transcript_name "PRP9"; transcript_source "ensembl"; transcript_biotype "protein_coding"; protein_id "YDL030W";
IV	ensembl	start_codon	397537	397539	.	+	0	gene_id "YDL030W"; transcript_id "YDL030W"; exon_number "1"; gene_name "PRP9"; gene_source "ensembl"; gene_biotype "protein_coding"; transcript_name "PRP9"; transcript_source "ensembl"; transcript_biotype "protein_coding";
IV	ensembl	stop_codon	399127	399129	.	+	0	gene_id "YDL030W"; transcript_id "YDL030W"; exon_number "1"; gene_name "PRP9"; gene_source "ensembl"; gene_biotype "protein_coding"; transcript_name "PRP9"; transcript_source "ensembl"; transcript_biotype "protein_coding";
IV	ensembl	gene	399340	400638	.	+	.	gene_id "YDL029W"; gene_name "ARP2"; gene_source "ensembl"; gene_biotype "protein_coding";
IV	ensembl	transcript	399340	400638	.	+	.	gene_id "YDL029W"; transcript_id "YDL029W"; gene_name "ARP2"; gene_source "ensembl"; gene_biotype "protein_coding"; transcript_name "ARP2"; transcript_source "ensembl"; transcript_biotype "protein_coding";
IV	ensembl	exon	399340	399361	.	+	.	gene_id "YDL029W"; transcript_id "YDL029W"; exon_number "1"; gene_name "ARP2"; gene_source "ensembl"; gene_biotype "protein_coding"; transcript_name "ARP2"; transcript_source "ensembl"; transcript_biotype "protein_coding"; exon_id "YDL029W.1";
IV	ensembl	CDS	399340	399361	.	+	0	gene_id "YDL029W"; transcript_id "YDL029W"; exon_number "1"; gene_name "ARP2"; gene_source "ensembl"; gene_biotype "protein_coding"; transcript_name "ARP2"; transcript_source "ensembl"; transcript_biotype "protein_coding"; protein_id "YDL029W";
IV	ensembl	start_codon	399340	399342	.	+	0	gene_id "YDL029W"; transcript_id "YDL029W"; exon_number "1"; gene_name "ARP2"; gene_source "ensembl"; gene_biotype "protein_coding"; transcript_name "ARP2"; transcript_source "ensembl"; transcript_biotype "protein_coding";
IV	ensembl	exon	399485	400638	.	+	.	gene_id "YDL029W"; transcript_id "YDL029W"; exon_number "2"; gene_name "ARP2"; gene_source "ensembl"; gene_biotype "protein_coding"; transcript_name "ARP2"; transcript_source "ensembl"; transcript_biotype "protein_coding"; exon_id "YDL029W.2";
IV	ensembl	CDS	399485	400638	.	+	1	gene_id "YDL029W"; transcript_id "YDL029W"; exon_number "2"; gene_name "ARP2"; gene_source "ensembl"; gene_biotype "protein_coding"; transcript_name "ARP2"; transcript_source "ensembl"; transcript_biotype "protein_coding"; protein_id "YDL029W";
IV	ensembl	gene	400997	403291	.	-	.	gene_id "YDL028C"; gene_name "MPS1"; gene_source "ensembl"; gene_biotype "protein_coding";
IV	ensembl	transcript	400997	403291	.	-	.	gene_id "YDL028C"; transcript_id "YDL028C"; gene_name "MPS1"; gene_source "ensembl"; gene_biotype "protein_coding"; transcript_name "MPS1"; transcript_source "ensembl"; transcript_biotype "protein_coding";
IV	ensembl	exon	400997	403291	.	-	.	gene_id "YDL028C"; transcript_id "YDL028C"; exon_number "1"; gene_name "MPS1"; gene_source "ensembl"; gene_biotype "protein_coding"; transcript_name "MPS1"; transcript_source "ensembl"; transcript_biotype "protein_coding"; exon_id "YDL028C.1";
IV	ensembl	CDS	401000	403291	.	-	0	gene_id "YDL028C"; transcript_id "YDL028C"; exon_number "1"; gene_name "MPS1"; gene_source "ensembl"; gene_biotype "protein_coding"; transcript_name "MPS1"; transcript_source "ensembl"; transcript_biotype "protein_coding"; protein_id "YDL028C";
IV	ensembl	start_codon	403289	403291	.	-	0	gene_id "YDL028C"; transcript_id "YDL028C"; exon_number "1"; gene_name "MPS1"; gene_source "ensembl"; gene_biotype "protein_coding"; transcript_name "MPS1"; transcript_source "ensembl"; transcript_biotype "protein_coding";
IV	ensembl	stop_codon	400997	400999	.	-	0	gene_id "YDL028C"; transcript_id "YDL028C"; exon_number "1"; gene_name "MPS1"; gene_source "ensembl"; gene_biotype "protein_coding"; transcript_name "MPS1"; transcript_source "ensembl"; transcript_biotype "protein_coding";
IV	ensembl	gene	403695	404957	.	-	.	gene_id "YDL027C"; gene_source "ensembl"; gene_biotype "protein_coding";
IV	ensembl	transcript	403695	404957	.	-	.	gene_id "YDL027C"; transcript_id "YDL027C"; gene_source "ensembl"; gene_biotype "protein_coding"; transcript_name "YDL027C"; transcript_source "ensembl"; transcript_biotype "protein_coding";
IV	ensembl	exon	403695	404957	.	-	.	gene_id "YDL027C"; transcript_id "YDL027C"; exon_number "1"; gene_source "ensembl"; gene_biotype "protein_coding"; transcript_name "YDL027C"; transcript_source "ensembl"; transcript_biotype "protein_coding"; exon_id "YDL027C.1";
IV	ensembl	CDS	403698	404957	.	-	0	gene_id "YDL027C"; transcript_id "YDL027C"; exon_number "1"; gene_source "ensembl"; gene_biotype "protein_coding"; transcript_name "YDL027C"; transcript_source "ensembl"; transcript_biotype "protein_coding"; protein_id "YDL027C";
IV	ensembl	start_codon	404955	404957	.	-	0	gene_id "YDL027C"; transcript_id "YDL027C"; exon_number "1"; gene_source "ensembl"; gene_biotype "protein_coding"; transcript_name "YDL027C"; transcript_source "ensembl"; transcript_biotype "protein_coding";
IV	ensembl	stop_codon	403695	403697	.	-	0	gene_id "YDL027C"; transcript_id "YDL027C"; exon_number "1"; gene_source "ensembl"; gene_biotype "protein_coding"; transcript_name "YDL027C"; transcript_source "ensembl"; transcript_biotype "protein_coding";
IV	ensembl	gene	404749	405060	.	+	.	gene_id "YDL026W"; gene_source "ensembl"; gene_biotype "protein_coding";
IV	ensembl	transcript	404749	405060	.	+	.	gene_id "YDL026W"; transcript_id "YDL026W"; gene_source "ensembl"; gene_biotype "protein_coding"; transcript_name "YDL026W"; transcript_source "ensembl"; transcript_biotype "protein_coding";
IV	ensembl	exon	404749	405060	.	+	.	gene_id "YDL026W"; transcript_id "YDL026W"; exon_number "1"; gene_source "ensembl"; gene_biotype "protein_coding"; transcript_name "YDL026W"; transcript_source "ensembl"; transcript_biotype "protein_coding"; exon_id "YDL026W.1";
IV	ensembl	CDS	404749	405057	.	+	0	gene_id "YDL026W"; transcript_id "YDL026W"; exon_number "1"; gene_source "ensembl"; gene_biotype "protein_coding"; transcript_name "YDL026W"; transcript_source "ensembl"; transcript_biotype "protein_coding"; protein_id "YDL026W";
IV	ensembl	start_codon	404749	404751	.	+	0	gene_id "YDL026W"; transcript_id "YDL026W"; exon_number "1"; gene_source "ensembl"; gene_biotype "protein_coding"; transcript_name "YDL026W"; transcript_source "ensembl"; transcript_biotype "protein_coding";
IV	ensembl	stop_codon	405058	405060	.	+	0	gene_id "YDL026W"; transcript_id "YDL026W"; exon_number "1"; gene_source "ensembl"; gene_biotype "protein_coding"; transcript_name "YDL026W"; transcript_source "ensembl"; transcript_biotype "protein_coding";
IV	ensembl	gene	405344	407206	.	-	.	gene_id "YDL025C"; gene_name "RTK1"; gene_source "ensembl"; gene_biotype "protein_coding";
IV	ensembl	transcript	405344	407206	.	-	.	gene_id "YDL025C"; transcript_id "YDL025C"; gene_name "RTK1"; gene_source "ensembl"; gene_biotype "protein_coding"; transcript_name "RTK1"; transcript_source "ensembl"; transcript_biotype "protein_coding";
IV	ensembl	exon	405344	407206	.	-	.	gene_id "YDL025C"; transcript_id "YDL025C"; exon_number "1"; gene_name "RTK1"; gene_source "ensembl"; gene_biotype "protein_coding"; transcript_name "RTK1"; transcript_source "ensembl"; transcript_biotype "protein_coding"; exon_id "YDL025C.1";
IV	ensembl	CDS	405347	407206	.	-	0	gene_id "YDL025C"; transcript_id "YDL025C"; exon_number "1"; gene_name "RTK1"; gene_source "ensembl"; gene_biotype "protein_coding"; transcript_name "RTK1"; transcript_source "ensembl"; transcript_biotype "protein_coding"; protein_id "YDL025C";
IV	ensembl	start_codon	407204	407206	.	-	0	gene_id "YDL025C"; transcript_id "YDL025C"; exon_number "1"; gene_name "RTK1"; gene_source "ensembl"; gene_biotype "protein_coding"; transcript_name "RTK1"; transcript_source "ensembl"; transcript_biotype "protein_coding";
IV	ensembl	stop_codon	405344	405346	.	-	0	gene_id "YDL025C"; transcript_id "YDL025C"; exon_number "1"; gene_name "RTK1"; gene_source "ensembl"; gene_biotype "protein_coding"; transcript_name "RTK1"; transcript_source "ensembl"; transcript_biotype "protein_coding";
IV	ensembl	gene	405410	405514	.	+	.	gene_id "YDL025W-A"; gene_source "ensembl"; gene_biotype "protein_coding";
IV	ensembl	transcript	405410	405514	.	+	.	gene_id "YDL025W-A"; transcript_id "YDL025W-A"; gene_source "ensembl"; gene_biotype "protein_coding"; transcript_name "YDL025W-A"; transcript_source "ensembl"; transcript_biotype "protein_coding";
IV	ensembl	exon	405410	405514	.	+	.	gene_id "YDL025W-A"; transcript_id "YDL025W-A"; exon_number "1"; gene_source "ensembl"; gene_biotype "protein_coding"; transcript_name "YDL025W-A"; transcript_source "ensembl"; transcript_biotype "protein_coding"; exon_id "YDL025W-A.1";
IV	ensembl	CDS	405410	405511	.	+	0	gene_id "YDL025W-A"; transcript_id "YDL025W-A"; exon_number "1"; gene_source "ensembl"; gene_biotype "protein_coding"; transcript_name "YDL025W-A"; transcript_source "ensembl"; transcript_biotype "protein_coding"; protein_id "YDL025W-A";
IV	ensembl	start_codon	405410	405412	.	+	0	gene_id "YDL025W-A"; transcript_id "YDL025W-A"; exon_number "1"; gene_source "ensembl"; gene_biotype "protein_coding"; transcript_name "YDL025W-A"; transcript_source "ensembl"; transcript_biotype "protein_coding";
IV	ensembl	stop_codon	405512	405514	.	+	0	gene_id "YDL025W-A"; transcript_id "YDL025W-A"; exon_number "1"; gene_source "ensembl"; gene_biotype "protein_coding"; transcript_name "YDL025W-A"; transcript_source "ensembl"; transcript_biotype "protein_coding";
IV	ensembl	gene	408451	409857	.	-	.	gene_id "YDL024C"; gene_name "DIA3"; gene_source "ensembl"; gene_biotype "protein_coding";
IV	ensembl	transcript	408451	409857	.	-	.	gene_id "YDL024C"; transcript_id "YDL024C"; gene_name "DIA3"; gene_source "ensembl"; gene_biotype "protein_coding"; transcript_name "DIA3"; transcript_source "ensembl"; transcript_biotype "protein_coding";
IV	ensembl	exon	408451	409857	.	-	.	gene_id "YDL024C"; transcript_id "YDL024C"; exon_number "1"; gene_name "DIA3"; gene_source "ensembl"; gene_biotype "protein_coding"; transcript_name "DIA3"; transcript_source "ensembl"; transcript_biotype "protein_coding"; exon_id "YDL024C.1";
IV	ensembl	CDS	408454	409857	.	-	0	gene_id "YDL024C"; transcript_id "YDL024C"; exon_number "1"; gene_name "DIA3"; gene_source "ensembl"; gene_biotype "protein_coding"; transcript_name "DIA3"; transcript_source "ensembl"; transcript_biotype "protein_coding"; protein_id "YDL024C";
IV	ensembl	start_codon	409855	409857	.	-	0	gene_id "YDL024C"; transcript_id "YDL024C"; exon_number "1"; gene_name "DIA3"; gene_source "ensembl"; gene_biotype "protein_coding"; transcript_name "DIA3"; transcript_source "ensembl"; transcript_biotype "protein_coding";
IV	ensembl	stop_codon	408451	408453	.	-	0	gene_id "YDL024C"; transcript_id "YDL024C"; exon_number "1"; gene_name "DIA3"; gene_source "ensembl"; gene_biotype "protein_coding"; transcript_name "DIA3"; transcript_source "ensembl"; transcript_biotype "protein_coding";
IV	ensembl	gene	409808	410056	.	-	.	gene_id "YDL022C-A"; gene_source "ensembl"; gene_biotype "protein_coding";
IV	ensembl	transcript	409808	410056	.	-	.	gene_id "YDL022C-A"; transcript_id "YDL022C-A"; gene_source "ensembl"; gene_biotype "protein_coding"; transcript_name "YDL022C-A"; transcript_source "ensembl"; transcript_biotype "protein_coding";
IV	ensembl	exon	409808	410056	.	-	.	gene_id "YDL022C-A"; transcript_id "YDL022C-A"; exon_number "1"; gene_source "ensembl"; gene_biotype "protein_coding"; transcript_name "YDL022C-A"; transcript_source "ensembl"; transcript_biotype "protein_coding"; exon_id "YDL022C-A.1";
IV	ensembl	CDS	409811	410056	.	-	0	gene_id "YDL022C-A"; transcript_id "YDL022C-A"; exon_number "1"; gene_source "ensembl"; gene_biotype "protein_coding"; transcript_name "YDL022C-A"; transcript_source "ensembl"; transcript_biotype "protein_coding"; protein_id "YDL022C-A";
IV	ensembl	start_codon	410054	410056	.	-	0	gene_id "YDL022C-A"; transcript_id "YDL022C-A"; exon_number "1"; gene_source "ensembl"; gene_biotype "protein_coding"; transcript_name "YDL022C-A"; transcript_source "ensembl"; transcript_biotype "protein_coding";
IV	ensembl	stop_codon	409808	409810	.	-	0	gene_id "YDL022C-A"; transcript_id "YDL022C-A"; exon_number "1"; gene_source "ensembl"; gene_biotype "protein_coding"; transcript_name "YDL022C-A"; transcript_source "ensembl"; transcript_biotype "protein_coding";
IV	ensembl	gene	410379	410451	.	+	.	gene_id "tA(AGC)D"; gene_source "ensembl"; gene_biotype "tRNA";
IV	ensembl	transcript	410379	410451	.	+	.	gene_id "tA(AGC)D"; transcript_id "tA(AGC)D"; gene_source "ensembl"; gene_biotype "tRNA"; transcript_name "tA(AGC)D"; transcript_source "ensembl"; transcript_biotype "tRNA";
IV	ensembl	exon	410379	410451	.	+	.	gene_id "tA(AGC)D"; transcript_id "tA(AGC)D"; exon_number "1"; gene_source "ensembl"; gene_biotype "tRNA"; transcript_name "tA(AGC)D"; transcript_source "ensembl"; transcript_biotype "tRNA"; exon_id "tA(AGC)D.1";
IV	ensembl	gene	411761	412081	.	-	.	gene_id "YDL023C"; gene_source "ensembl"; gene_biotype "protein_coding";
IV	ensembl	transcript	411761	412081	.	-	.	gene_id "YDL023C"; transcript_id "YDL023C"; gene_source "ensembl"; gene_biotype "protein_coding"; transcript_name "YDL023C"; transcript_source "ensembl"; transcript_biotype "protein_coding";
IV	ensembl	exon	411761	412081	.	-	.	gene_id "YDL023C"; transcript_id "YDL023C"; exon_number "1"; gene_source "ensembl"; gene_biotype "protein_coding"; transcript_name "YDL023C"; transcript_source "ensembl"; transcript_biotype "protein_coding"; exon_id "YDL023C.1";
IV	ensembl	CDS	411764	412081	.	-	0	gene_id "YDL023C"; transcript_id "YDL023C"; exon_number "1"; gene_source "ensembl"; gene_biotype "protein_coding"; transcript_name "YDL023C"; transcript_source "ensembl"; transcript_biotype "protein_coding"; protein_id "YDL023C";
IV	ensembl	start_codon	412079	412081	.	-	0	gene_id "YDL023C"; transcript_id "YDL023C"; exon_number "1"; gene_source "ensembl"; gene_biotype "protein_coding"; transcript_name "YDL023C"; transcript_source "ensembl"; transcript_biotype "protein_coding";
IV	ensembl	stop_codon	411761	411763	.	-	0	gene_id "YDL023C"; transcript_id "YDL023C"; exon_number "1"; gene_source "ensembl"; gene_biotype "protein_coding"; transcript_name "YDL023C"; transcript_source "ensembl"; transcript_biotype "protein_coding";
IV	ensembl	gene	411825	413000	.	+	.	gene_id "YDL022W"; gene_name "GPD1"; gene_source "ensembl"; gene_biotype "protein_coding";
IV	ensembl	transcript	411825	413000	.	+	.	gene_id "YDL022W"; transcript_id "YDL022W"; gene_name "GPD1"; gene_source "ensembl"; gene_biotype "protein_coding"; transcript_name "GPD1"; transcript_source "ensembl"; transcript_biotype "protein_coding";
IV	ensembl	exon	411825	413000	.	+	.	gene_id "YDL022W"; transcript_id "YDL022W"; exon_number "1"; gene_name "GPD1"; gene_source "ensembl"; gene_biotype "protein_coding"; transcript_name "GPD1"; transcript_source "ensembl"; transcript_biotype "protein_coding"; exon_id "YDL022W.1";
IV	ensembl	CDS	411825	412997	.	+	0	gene_id "YDL022W"; transcript_id "YDL022W"; exon_number "1"; gene_name "GPD1"; gene_source "ensembl"; gene_biotype "protein_coding"; transcript_name "GPD1"; transcript_source "ensembl"; transcript_biotype "protein_coding"; protein_id "YDL022W";
IV	ensembl	start_codon	411825	411827	.	+	0	gene_id "YDL022W"; transcript_id "YDL022W"; exon_number "1"; gene_name "GPD1"; gene_source "ensembl"; gene_biotype "protein_coding"; transcript_name "GPD1"; transcript_source "ensembl"; transcript_biotype "protein_coding";
IV	ensembl	stop_codon	412998	413000	.	+	0	gene_id "YDL022W"; transcript_id "YDL022W"; exon_number "1"; gene_name "GPD1"; gene_source "ensembl"; gene_biotype "protein_coding"; transcript_name "GPD1"; transcript_source "ensembl"; transcript_biotype "protein_coding";
IV	ensembl	gene	413953	414888	.	+	.	gene_id "YDL021W"; gene_name "GPM2"; gene_source "ensembl"; gene_biotype "protein_coding";
IV	ensembl	transcript	413953	414888	.	+	.	gene_id "YDL021W"; transcript_id "YDL021W"; gene_name "GPM2"; gene_source "ensembl"; gene_biotype "protein_coding"; transcript_name "GPM2"; transcript_source "ensembl"; transcript_biotype "protein_coding";
IV	ensembl	exon	413953	414888	.	+	.	gene_id "YDL021W"; transcript_id "YDL021W"; exon_number "1"; gene_name "GPM2"; gene_source "ensembl"; gene_biotype "protein_coding"; transcript_name "GPM2"; transcript_source "ensembl"; transcript_biotype "protein_coding"; exon_id "YDL021W.1";
IV	ensembl	CDS	413953	414885	.	+	0	gene_id "YDL021W"; transcript_id "YDL021W"; exon_number "1"; gene_name "GPM2"; gene_source "ensembl"; gene_biotype "protein_coding"; transcript_name "GPM2"; transcript_source "ensembl"; transcript_biotype "protein_coding"; protein_id "YDL021W";
IV	ensembl	start_codon	413953	413955	.	+	0	gene_id "YDL021W"; transcript_id "YDL021W"; exon_number "1"; gene_name "GPM2"; gene_source "ensembl"; gene_biotype "protein_coding"; transcript_name "GPM2"; transcript_source "ensembl"; transcript_biotype "protein_coding";
IV	ensembl	stop_codon	414886	414888	.	+	0	gene_id "YDL021W"; transcript_id "YDL021W"; exon_number "1"; gene_name "GPM2"; gene_source "ensembl"; gene_biotype "protein_coding"; transcript_name "GPM2"; transcript_source "ensembl"; transcript_biotype "protein_coding";
IV	ensembl	gene	415113	416708	.	-	.	gene_id "YDL020C"; gene_name "RPN4"; gene_source "ensembl"; gene_biotype "protein_coding";
IV	ensembl	transcript	415113	416708	.	-	.	gene_id "YDL020C"; transcript_id "YDL020C"; gene_name "RPN4"; gene_source "ensembl"; gene_biotype "protein_coding"; transcript_name "RPN4"; transcript_source "ensembl"; transcript_biotype "protein_coding";
IV	ensembl	exon	415113	416708	.	-	.	gene_id "YDL020C"; transcript_id "YDL020C"; exon_number "1"; gene_name "RPN4"; gene_source "ensembl"; gene_biotype "protein_coding"; transcript_name "RPN4"; transcript_source "ensembl"; transcript_biotype "protein_coding"; exon_id "YDL020C.1";
IV	ensembl	CDS	415116	416708	.	-	0	gene_id "YDL020C"; transcript_id "YDL020C"; exon_number "1"; gene_name "RPN4"; gene_source "ensembl"; gene_biotype "protein_coding"; transcript_name "RPN4"; transcript_source "ensembl"; transcript_biotype "protein_coding"; protein_id "YDL020C";
IV	ensembl	start_codon	416706	416708	.	-	0	gene_id "YDL020C"; transcript_id "YDL020C"; exon_number "1"; gene_name "RPN4"; gene_source "ensembl"; gene_biotype "protein_coding"; transcript_name "RPN4"; transcript_source "ensembl"; transcript_biotype "protein_coding";
IV	ensembl	stop_codon	415113	415115	.	-	0	gene_id "YDL020C"; transcript_id "YDL020C"; exon_number "1"; gene_name "RPN4"; gene_source "ensembl"; gene_biotype "protein_coding"; transcript_name "RPN4"; transcript_source "ensembl"; transcript_biotype "protein_coding";
IV	ensembl	gene	417663	421514	.	-	.	gene_id "YDL019C"; gene_name "OSH2"; gene_source "ensembl"; gene_biotype "protein_coding";
IV	ensembl	transcript	417663	421514	.	-	.	gene_id "YDL019C"; transcript_id "YDL019C"; gene_name "OSH2"; gene_source "ensembl"; gene_biotype "protein_coding"; transcript_name "OSH2"; transcript_source "ensembl"; transcript_biotype "protein_coding";
IV	ensembl	exon	417663	421514	.	-	.	gene_id "YDL019C"; transcript_id "YDL019C"; exon_number "1"; gene_name "OSH2"; gene_source "ensembl"; gene_biotype "protein_coding"; transcript_name "OSH2"; transcript_source "ensembl"; transcript_biotype "protein_coding"; exon_id "YDL019C.1";
IV	ensembl	CDS	417666	421514	.	-	0	gene_id "YDL019C"; transcript_id "YDL019C"; exon_number "1"; gene_name "OSH2"; gene_source "ensembl"; gene_biotype "protein_coding"; transcript_name "OSH2"; transcript_source "ensembl"; transcript_biotype "protein_coding"; protein_id "YDL019C";
IV	ensembl	start_codon	421512	421514	.	-	0	gene_id "YDL019C"; transcript_id "YDL019C"; exon_number "1"; gene_name "OSH2"; gene_source "ensembl"; gene_biotype "protein_coding"; transcript_name "OSH2"; transcript_source "ensembl"; transcript_biotype "protein_coding";
IV	ensembl	stop_codon	417663	417665	.	-	0	gene_id "YDL019C"; transcript_id "YDL019C"; exon_number "1"; gene_name "OSH2"; gene_source "ensembl"; gene_biotype "protein_coding"; transcript_name "OSH2"; transcript_source "ensembl"; transcript_biotype "protein_coding";
IV	ensembl	gene	422833	423510	.	-	.	gene_id "YDL018C"; gene_name "ERP3"; gene_source "ensembl"; gene_biotype "protein_coding";
IV	ensembl	transcript	422833	423510	.	-	.	gene_id "YDL018C"; transcript_id "YDL018C"; gene_name "ERP3"; gene_source "ensembl"; gene_biotype "protein_coding"; transcript_name "ERP3"; transcript_source "ensembl"; transcript_biotype "protein_coding";
IV	ensembl	exon	422833	423510	.	-	.	gene_id "YDL018C"; transcript_id "YDL018C"; exon_number "1"; gene_name "ERP3"; gene_source "ensembl"; gene_biotype "protein_coding"; transcript_name "ERP3"; transcript_source "ensembl"; transcript_biotype "protein_coding"; exon_id "YDL018C.1";
IV	ensembl	CDS	422836	423510	.	-	0	gene_id "YDL018C"; transcript_id "YDL018C"; exon_number "1"; gene_name "ERP3"; gene_source "ensembl"; gene_biotype "protein_coding"; transcript_name "ERP3"; transcript_source "ensembl"; transcript_biotype "protein_coding"; protein_id "YDL018C";
IV	ensembl	start_codon	423508	423510	.	-	0	gene_id "YDL018C"; transcript_id "YDL018C"; exon_number "1"; gene_name "ERP3"; gene_source "ensembl"; gene_biotype "protein_coding"; transcript_name "ERP3"; transcript_source "ensembl"; transcript_biotype "protein_coding";
IV	ensembl	stop_codon	422833	422835	.	-	0	gene_id "YDL018C"; transcript_id "YDL018C"; exon_number "1"; gene_name "ERP3"; gene_source "ensembl"; gene_biotype "protein_coding"; transcript_name "ERP3"; transcript_source "ensembl"; transcript_biotype "protein_coding";
IV	ensembl	gene	424209	425732	.	+	.	gene_id "YDL017W"; gene_name "CDC7"; gene_source "ensembl"; gene_biotype "protein_coding";
IV	ensembl	transcript	424209	425732	.	+	.	gene_id "YDL017W"; transcript_id "YDL017W"; gene_name "CDC7"; gene_source "ensembl"; gene_biotype "protein_coding"; transcript_name "CDC7"; transcript_source "ensembl"; transcript_biotype "protein_coding";
IV	ensembl	exon	424209	425732	.	+	.	gene_id "YDL017W"; transcript_id "YDL017W"; exon_number "1"; gene_name "CDC7"; gene_source "ensembl"; gene_biotype "protein_coding"; transcript_name "CDC7"; transcript_source "ensembl"; transcript_biotype "protein_coding"; exon_id "YDL017W.1";
IV	ensembl	CDS	424209	425729	.	+	0	gene_id "YDL017W"; transcript_id "YDL017W"; exon_number "1"; gene_name "CDC7"; gene_source "ensembl"; gene_biotype "protein_coding"; transcript_name "CDC7"; transcript_source "ensembl"; transcript_biotype "protein_coding"; protein_id "YDL017W";
IV	ensembl	start_codon	424209	424211	.	+	0	gene_id "YDL017W"; transcript_id "YDL017W"; exon_number "1"; gene_name "CDC7"; gene_source "ensembl"; gene_biotype "protein_coding"; transcript_name "CDC7"; transcript_source "ensembl"; transcript_biotype "protein_coding";
IV	ensembl	stop_codon	425730	425732	.	+	0	gene_id "YDL017W"; transcript_id "YDL017W"; exon_number "1"; gene_name "CDC7"; gene_source "ensembl"; gene_biotype "protein_coding"; transcript_name "CDC7"; transcript_source "ensembl"; transcript_biotype "protein_coding";
IV	ensembl	gene	425570	425872	.	-	.	gene_id "YDL016C"; gene_source "ensembl"; gene_biotype "protein_coding";
IV	ensembl	transcript	425570	425872	.	-	.	gene_id "YDL016C"; transcript_id "YDL016C"; gene_source "ensembl"; gene_biotype "protein_coding"; transcript_name "YDL016C"; transcript_source "ensembl"; transcript_biotype "protein_coding";
IV	ensembl	exon	425570	425872	.	-	.	gene_id "YDL016C"; transcript_id "YDL016C"; exon_number "1"; gene_source "ensembl"; gene_biotype "protein_coding"; transcript_name "YDL016C"; transcript_source "ensembl"; transcript_biotype "protein_coding"; exon_id "YDL016C.1";
IV	ensembl	CDS	425573	425872	.	-	0	gene_id "YDL016C"; transcript_id "YDL016C"; exon_number "1"; gene_source "ensembl"; gene_biotype "protein_coding"; transcript_name "YDL016C"; transcript_source "ensembl"; transcript_biotype "protein_coding"; protein_id "YDL016C";
IV	ensembl	start_codon	425870	425872	.	-	0	gene_id "YDL016C"; transcript_id "YDL016C"; exon_number "1"; gene_source "ensembl"; gene_biotype "protein_coding"; transcript_name "YDL016C"; transcript_source "ensembl"; transcript_biotype "protein_coding";
IV	ensembl	stop_codon	425570	425572	.	-	0	gene_id "YDL016C"; transcript_id "YDL016C"; exon_number "1"; gene_source "ensembl"; gene_biotype "protein_coding"; transcript_name "YDL016C"; transcript_source "ensembl"; transcript_biotype "protein_coding";
IV	ensembl	gene	426002	426934	.	-	.	gene_id "YDL015C"; gene_name "TSC13"; gene_source "ensembl"; gene_biotype "protein_coding";
IV	ensembl	transcript	426002	426934	.	-	.	gene_id "YDL015C"; transcript_id "YDL015C"; gene_name "TSC13"; gene_source "ensembl"; gene_biotype "protein_coding"; transcript_name "TSC13"; transcript_source "ensembl"; transcript_biotype "protein_coding";
IV	ensembl	exon	426002	426934	.	-	.	gene_id "YDL015C"; transcript_id "YDL015C"; exon_number "1"; gene_name "TSC13"; gene_source "ensembl"; gene_biotype "protein_coding"; transcript_name "TSC13"; transcript_source "ensembl"; transcript_biotype "protein_coding"; exon_id "YDL015C.1";
IV	ensembl	CDS	426005	426934	.	-	0	gene_id "YDL015C"; transcript_id "YDL015C"; exon_number "1"; gene_name "TSC13"; gene_source "ensembl"; gene_biotype "protein_coding"; transcript_name "TSC13"; transcript_source "ensembl"; transcript_biotype "protein_coding"; protein_id "YDL015C";
IV	ensembl	start_codon	426932	426934	.	-	0	gene_id "YDL015C"; transcript_id "YDL015C"; exon_number "1"; gene_name "TSC13"; gene_source "ensembl"; gene_biotype "protein_coding"; transcript_name "TSC13"; transcript_source "ensembl"; transcript_biotype "protein_coding";
IV	ensembl	stop_codon	426002	426004	.	-	0	gene_id "YDL015C"; transcript_id "YDL015C"; exon_number "1"; gene_name "TSC13"; gene_source "ensembl"; gene_biotype "protein_coding"; transcript_name "TSC13"; transcript_source "ensembl"; transcript_biotype "protein_coding";
IV	ensembl	gene	427364	428347	.	+	.	gene_id "YDL014W"; gene_name "NOP1"; gene_source "ensembl"; gene_biotype "protein_coding";
IV	ensembl	transcript	427364	428347	.	+	.	gene_id "YDL014W"; transcript_id "YDL014W"; gene_name "NOP1"; gene_source "ensembl"; gene_biotype "protein_coding"; transcript_name "NOP1"; transcript_source "ensembl"; transcript_biotype "protein_coding";
IV	ensembl	exon	427364	428347	.	+	.	gene_id "YDL014W"; transcript_id "YDL014W"; exon_number "1"; gene_name "NOP1"; gene_source "ensembl"; gene_biotype "protein_coding"; transcript_name "NOP1"; transcript_source "ensembl"; transcript_biotype "protein_coding"; exon_id "YDL014W.1";
IV	ensembl	CDS	427364	428344	.	+	0	gene_id "YDL014W"; transcript_id "YDL014W"; exon_number "1"; gene_name "NOP1"; gene_source "ensembl"; gene_biotype "protein_coding"; transcript_name "NOP1"; transcript_source "ensembl"; transcript_biotype "protein_coding"; protein_id "YDL014W";
IV	ensembl	start_codon	427364	427366	.	+	0	gene_id "YDL014W"; transcript_id "YDL014W"; exon_number "1"; gene_name "NOP1"; gene_source "ensembl"; gene_biotype "protein_coding"; transcript_name "NOP1"; transcript_source "ensembl"; transcript_biotype "protein_coding";
IV	ensembl	stop_codon	428345	428347	.	+	0	gene_id "YDL014W"; transcript_id "YDL014W"; exon_number "1"; gene_name "NOP1"; gene_source "ensembl"; gene_biotype "protein_coding"; transcript_name "NOP1"; transcript_source "ensembl"; transcript_biotype "protein_coding";
IV	ensembl	gene	429067	430926	.	+	.	gene_id "YDL013W"; gene_name "SLX5"; gene_source "ensembl"; gene_biotype "protein_coding";
IV	ensembl	transcript	429067	430926	.	+	.	gene_id "YDL013W"; transcript_id "YDL013W"; gene_name "SLX5"; gene_source "ensembl"; gene_biotype "protein_coding"; transcript_name "SLX5"; transcript_source "ensembl"; transcript_biotype "protein_coding";
IV	ensembl	exon	429067	430926	.	+	.	gene_id "YDL013W"; transcript_id "YDL013W"; exon_number "1"; gene_name "SLX5"; gene_source "ensembl"; gene_biotype "protein_coding"; transcript_name "SLX5"; transcript_source "ensembl"; transcript_biotype "protein_coding"; exon_id "YDL013W.1";
IV	ensembl	CDS	429067	430923	.	+	0	gene_id "YDL013W"; transcript_id "YDL013W"; exon_number "1"; gene_name "SLX5"; gene_source "ensembl"; gene_biotype "protein_coding"; transcript_name "SLX5"; transcript_source "ensembl"; transcript_biotype "protein_coding"; protein_id "YDL013W";
IV	ensembl	start_codon	429067	429069	.	+	0	gene_id "YDL013W"; transcript_id "YDL013W"; exon_number "1"; gene_name "SLX5"; gene_source "ensembl"; gene_biotype "protein_coding"; transcript_name "SLX5"; transcript_source "ensembl"; transcript_biotype "protein_coding";
IV	ensembl	stop_codon	430924	430926	.	+	0	gene_id "YDL013W"; transcript_id "YDL013W"; exon_number "1"; gene_name "SLX5"; gene_source "ensembl"; gene_biotype "protein_coding"; transcript_name "SLX5"; transcript_source "ensembl"; transcript_biotype "protein_coding";
IV	ensembl	gene	431108	431517	.	-	.	gene_id "YDL012C"; gene_source "ensembl"; gene_biotype "protein_coding";
IV	ensembl	transcript	431108	431517	.	-	.	gene_id "YDL012C"; transcript_id "YDL012C"; gene_source "ensembl"; gene_biotype "protein_coding"; transcript_name "YDL012C"; transcript_source "ensembl"; transcript_biotype "protein_coding";
IV	ensembl	exon	431473	431517	.	-	.	gene_id "YDL012C"; transcript_id "YDL012C"; exon_number "1"; gene_source "ensembl"; gene_biotype "protein_coding"; transcript_name "YDL012C"; transcript_source "ensembl"; transcript_biotype "protein_coding"; exon_id "YDL012C.1";
IV	ensembl	CDS	431473	431517	.	-	0	gene_id "YDL012C"; transcript_id "YDL012C"; exon_number "1"; gene_source "ensembl"; gene_biotype "protein_coding"; transcript_name "YDL012C"; transcript_source "ensembl"; transcript_biotype "protein_coding"; protein_id "YDL012C";
IV	ensembl	start_codon	431515	431517	.	-	0	gene_id "YDL012C"; transcript_id "YDL012C"; exon_number "1"; gene_source "ensembl"; gene_biotype "protein_coding"; transcript_name "YDL012C"; transcript_source "ensembl"; transcript_biotype "protein_coding";
IV	ensembl	exon	431108	431386	.	-	.	gene_id "YDL012C"; transcript_id "YDL012C"; exon_number "2"; gene_source "ensembl"; gene_biotype "protein_coding"; transcript_name "YDL012C"; transcript_source "ensembl"; transcript_biotype "protein_coding"; exon_id "YDL012C.2";
IV	ensembl	CDS	431111	431386	.	-	0	gene_id "YDL012C"; transcript_id "YDL012C"; exon_number "2"; gene_source "ensembl"; gene_biotype "protein_coding"; transcript_name "YDL012C"; transcript_source "ensembl"; transcript_biotype "protein_coding"; protein_id "YDL012C";
IV	ensembl	stop_codon	431108	431110	.	-	0	gene_id "YDL012C"; transcript_id "YDL012C"; exon_number "2"; gene_source "ensembl"; gene_biotype "protein_coding"; transcript_name "YDL012C"; transcript_source "ensembl"; transcript_biotype "protein_coding";
IV	ensembl	gene	432308	432631	.	-	.	gene_id "YDL011C"; gene_source "ensembl"; gene_biotype "protein_coding";
IV	ensembl	transcript	432308	432631	.	-	.	gene_id "YDL011C"; transcript_id "YDL011C"; gene_source "ensembl"; gene_biotype "protein_coding"; transcript_name "YDL011C"; transcript_source "ensembl"; transcript_biotype "protein_coding";
IV	ensembl	exon	432308	432631	.	-	.	gene_id "YDL011C"; transcript_id "YDL011C"; exon_number "1"; gene_source "ensembl"; gene_biotype "protein_coding"; transcript_name "YDL011C"; transcript_source "ensembl"; transcript_biotype "protein_coding"; exon_id "YDL011C.1";
IV	ensembl	CDS	432311	432631	.	-	0	gene_id "YDL011C"; transcript_id "YDL011C"; exon_number "1"; gene_source "ensembl"; gene_biotype "protein_coding"; transcript_name "YDL011C"; transcript_source "ensembl"; transcript_biotype "protein_coding"; protein_id "YDL011C";
IV	ensembl	start_codon	432629	432631	.	-	0	gene_id "YDL011C"; transcript_id "YDL011C"; exon_number "1"; gene_source "ensembl"; gene_biotype "protein_coding"; transcript_name "YDL011C"; transcript_source "ensembl"; transcript_biotype "protein_coding";
IV	ensembl	stop_codon	432308	432310	.	-	0	gene_id "YDL011C"; transcript_id "YDL011C"; exon_number "1"; gene_source "ensembl"; gene_biotype "protein_coding"; transcript_name "YDL011C"; transcript_source "ensembl"; transcript_biotype "protein_coding";
IV	ensembl	gene	432330	433025	.	+	.	gene_id "YDL010W"; gene_name "GRX6"; gene_source "ensembl"; gene_biotype "protein_coding";
IV	ensembl	transcript	432330	433025	.	+	.	gene_id "YDL010W"; transcript_id "YDL010W"; gene_name "GRX6"; gene_source "ensembl"; gene_biotype "protein_coding"; transcript_name "GRX6"; transcript_source "ensembl"; transcript_biotype "protein_coding";
IV	ensembl	exon	432330	433025	.	+	.	gene_id "YDL010W"; transcript_id "YDL010W"; exon_number "1"; gene_name "GRX6"; gene_source "ensembl"; gene_biotype "protein_coding"; transcript_name "GRX6"; transcript_source "ensembl"; transcript_biotype "protein_coding"; exon_id "YDL010W.1";
IV	ensembl	CDS	432330	433022	.	+	0	gene_id "YDL010W"; transcript_id "YDL010W"; exon_number "1"; gene_name "GRX6"; gene_source "ensembl"; gene_biotype "protein_coding"; transcript_name "GRX6"; transcript_source "ensembl"; transcript_biotype "protein_coding"; protein_id "YDL010W";
IV	ensembl	start_codon	432330	432332	.	+	0	gene_id "YDL010W"; transcript_id "YDL010W"; exon_number "1"; gene_name "GRX6"; gene_source "ensembl"; gene_biotype "protein_coding"; transcript_name "GRX6"; transcript_source "ensembl"; transcript_biotype "protein_coding";
IV	ensembl	stop_codon	433023	433025	.	+	0	gene_id "YDL010W"; transcript_id "YDL010W"; exon_number "1"; gene_name "GRX6"; gene_source "ensembl"; gene_biotype "protein_coding"; transcript_name "GRX6"; transcript_source "ensembl"; transcript_biotype "protein_coding";
IV	ensembl	gene	432925	433248	.	-	.	gene_id "YDL009C"; gene_source "ensembl"; gene_biotype "protein_coding";
IV	ensembl	transcript	432925	433248	.	-	.	gene_id "YDL009C"; transcript_id "YDL009C"; gene_source "ensembl"; gene_biotype "protein_coding"; transcript_name "YDL009C"; transcript_source "ensembl"; transcript_biotype "protein_coding";
IV	ensembl	exon	432925	433248	.	-	.	gene_id "YDL009C"; transcript_id "YDL009C"; exon_number "1"; gene_source "ensembl"; gene_biotype "protein_coding"; transcript_name "YDL009C"; transcript_source "ensembl"; transcript_biotype "protein_coding"; exon_id "YDL009C.1";
IV	ensembl	CDS	432928	433248	.	-	0	gene_id "YDL009C"; transcript_id "YDL009C"; exon_number "1"; gene_source "ensembl"; gene_biotype "protein_coding"; transcript_name "YDL009C"; transcript_source "ensembl"; transcript_biotype "protein_coding"; protein_id "YDL009C";
IV	ensembl	start_codon	433246	433248	.	-	0	gene_id "YDL009C"; transcript_id "YDL009C"; exon_number "1"; gene_source "ensembl"; gene_biotype "protein_coding"; transcript_name "YDL009C"; transcript_source "ensembl"; transcript_biotype "protein_coding";
IV	ensembl	stop_codon	432925	432927	.	-	0	gene_id "YDL009C"; transcript_id "YDL009C"; exon_number "1"; gene_source "ensembl"; gene_biotype "protein_coding"; transcript_name "YDL009C"; transcript_source "ensembl"; transcript_biotype "protein_coding";
IV	ensembl	gene	433497	433994	.	+	.	gene_id "YDL008W"; gene_name "APC11"; gene_source "ensembl"; gene_biotype "protein_coding";
IV	ensembl	transcript	433497	433994	.	+	.	gene_id "YDL008W"; transcript_id "YDL008W"; gene_name "APC11"; gene_source "ensembl"; gene_biotype "protein_coding"; transcript_name "APC11"; transcript_source "ensembl"; transcript_biotype "protein_coding";
IV	ensembl	exon	433497	433994	.	+	.	gene_id "YDL008W"; transcript_id "YDL008W"; exon_number "1"; gene_name "APC11"; gene_source "ensembl"; gene_biotype "protein_coding"; transcript_name "APC11"; transcript_source "ensembl"; transcript_biotype "protein_coding"; exon_id "YDL008W.1";
IV	ensembl	CDS	433497	433991	.	+	0	gene_id "YDL008W"; transcript_id "YDL008W"; exon_number "1"; gene_name "APC11"; gene_source "ensembl"; gene_biotype "protein_coding"; transcript_name "APC11"; transcript_source "ensembl"; transcript_biotype "protein_coding"; protein_id "YDL008W";
IV	ensembl	start_codon	433497	433499	.	+	0	gene_id "YDL008W"; transcript_id "YDL008W"; exon_number "1"; gene_name "APC11"; gene_source "ensembl"; gene_biotype "protein_coding"; transcript_name "APC11"; transcript_source "ensembl"; transcript_biotype "protein_coding";
IV	ensembl	stop_codon	433992	433994	.	+	0	gene_id "YDL008W"; transcript_id "YDL008W"; exon_number "1"; gene_name "APC11"; gene_source "ensembl"; gene_biotype "protein_coding"; transcript_name "APC11"; transcript_source "ensembl"; transcript_biotype "protein_coding";
IV	ensembl	gene	434264	434336	.	-	.	gene_id "tT(AGU)D"; gene_source "ensembl"; gene_biotype "tRNA";
IV	ensembl	transcript	434264	434336	.	-	.	gene_id "tT(AGU)D"; transcript_id "tT(AGU)D"; gene_source "ensembl"; gene_biotype "tRNA"; transcript_name "tT(AGU)D"; transcript_source "ensembl"; transcript_biotype "tRNA";
IV	ensembl	exon	434264	434336	.	-	.	gene_id "tT(AGU)D"; transcript_id "tT(AGU)D"; exon_number "1"; gene_source "ensembl"; gene_biotype "tRNA"; transcript_name "tT(AGU)D"; transcript_source "ensembl"; transcript_biotype "tRNA"; exon_id "tT(AGU)D.1";
IV	ensembl	gene	436567	436824	.	-	.	gene_id "YDL007C-A"; gene_source "ensembl"; gene_biotype "protein_coding";
IV	ensembl	transcript	436567	436824	.	-	.	gene_id "YDL007C-A"; transcript_id "YDL007C-A"; gene_source "ensembl"; gene_biotype "protein_coding"; transcript_name "YDL007C-A"; transcript_source "ensembl"; transcript_biotype "protein_coding";
IV	ensembl	exon	436567	436824	.	-	.	gene_id "YDL007C-A"; transcript_id "YDL007C-A"; exon_number "1"; gene_source "ensembl"; gene_biotype "protein_coding"; transcript_name "YDL007C-A"; transcript_source "ensembl"; transcript_biotype "protein_coding"; exon_id "YDL007C-A.1";
IV	ensembl	CDS	436570	436824	.	-	0	gene_id "YDL007C-A"; transcript_id "YDL007C-A"; exon_number "1"; gene_source "ensembl"; gene_biotype "protein_coding"; transcript_name "YDL007C-A"; transcript_source "ensembl"; transcript_biotype "protein_coding"; protein_id "YDL007C-A";
IV	ensembl	start_codon	436822	436824	.	-	0	gene_id "YDL007C-A"; transcript_id "YDL007C-A"; exon_number "1"; gene_source "ensembl"; gene_biotype "protein_coding"; transcript_name "YDL007C-A"; transcript_source "ensembl"; transcript_biotype "protein_coding";
IV	ensembl	stop_codon	436567	436569	.	-	0	gene_id "YDL007C-A"; transcript_id "YDL007C-A"; exon_number "1"; gene_source "ensembl"; gene_biotype "protein_coding"; transcript_name "YDL007C-A"; transcript_source "ensembl"; transcript_biotype "protein_coding";
IV	ensembl	gene	437772	437853	.	+	.	gene_id "tS(AGA)D1"; gene_source "ensembl"; gene_biotype "tRNA";
IV	ensembl	transcript	437772	437853	.	+	.	gene_id "tS(AGA)D1"; transcript_id "tS(AGA)D1"; gene_source "ensembl"; gene_biotype "tRNA"; transcript_name "tS(AGA)D1"; transcript_source "ensembl"; transcript_biotype "tRNA";
IV	ensembl	exon	437772	437853	.	+	.	gene_id "tS(AGA)D1"; transcript_id "tS(AGA)D1"; exon_number "1"; gene_source "ensembl"; gene_biotype "tRNA"; transcript_name "tS(AGA)D1"; transcript_source "ensembl"; transcript_biotype "tRNA"; exon_id "tS(AGA)D1.1";
IV	ensembl	gene	438047	439360	.	+	.	gene_id "YDL007W"; gene_name "RPT2"; gene_source "ensembl"; gene_biotype "protein_coding";
IV	ensembl	transcript	438047	439360	.	+	.	gene_id "YDL007W"; transcript_id "YDL007W"; gene_name "RPT2"; gene_source "ensembl"; gene_biotype "protein_coding"; transcript_name "RPT2"; transcript_source "ensembl"; transcript_biotype "protein_coding";
IV	ensembl	exon	438047	439360	.	+	.	gene_id "YDL007W"; transcript_id "YDL007W"; exon_number "1"; gene_name "RPT2"; gene_source "ensembl"; gene_biotype "protein_coding"; transcript_name "RPT2"; transcript_source "ensembl"; transcript_biotype "protein_coding"; exon_id "YDL007W.1";
IV	ensembl	CDS	438047	439357	.	+	0	gene_id "YDL007W"; transcript_id "YDL007W"; exon_number "1"; gene_name "RPT2"; gene_source "ensembl"; gene_biotype "protein_coding"; transcript_name "RPT2"; transcript_source "ensembl"; transcript_biotype "protein_coding"; protein_id "YDL007W";
IV	ensembl	start_codon	438047	438049	.	+	0	gene_id "YDL007W"; transcript_id "YDL007W"; exon_number "1"; gene_name "RPT2"; gene_source "ensembl"; gene_biotype "protein_coding"; transcript_name "RPT2"; transcript_source "ensembl"; transcript_biotype "protein_coding";
IV	ensembl	stop_codon	439358	439360	.	+	0	gene_id "YDL007W"; transcript_id "YDL007W"; exon_number "1"; gene_name "RPT2"; gene_source "ensembl"; gene_biotype "protein_coding"; transcript_name "RPT2"; transcript_source "ensembl"; transcript_biotype "protein_coding";
IV	ensembl	gene	439909	440754	.	+	.	gene_id "YDL006W"; gene_name "PTC1"; gene_source "ensembl"; gene_biotype "protein_coding";
IV	ensembl	transcript	439909	440754	.	+	.	gene_id "YDL006W"; transcript_id "YDL006W"; gene_name "PTC1"; gene_source "ensembl"; gene_biotype "protein_coding"; transcript_name "PTC1"; transcript_source "ensembl"; transcript_biotype "protein_coding";
IV	ensembl	exon	439909	440754	.	+	.	gene_id "YDL006W"; transcript_id "YDL006W"; exon_number "1"; gene_name "PTC1"; gene_source "ensembl"; gene_biotype "protein_coding"; transcript_name "PTC1"; transcript_source "ensembl"; transcript_biotype "protein_coding"; exon_id "YDL006W.1";
IV	ensembl	CDS	439909	440751	.	+	0	gene_id "YDL006W"; transcript_id "YDL006W"; exon_number "1"; gene_name "PTC1"; gene_source "ensembl"; gene_biotype "protein_coding"; transcript_name "PTC1"; transcript_source "ensembl"; transcript_biotype "protein_coding"; protein_id "YDL006W";
IV	ensembl	start_codon	439909	439911	.	+	0	gene_id "YDL006W"; transcript_id "YDL006W"; exon_number "1"; gene_name "PTC1"; gene_source "ensembl"; gene_biotype "protein_coding"; transcript_name "PTC1"; transcript_source "ensembl"; transcript_biotype "protein_coding";
IV	ensembl	stop_codon	440752	440754	.	+	0	gene_id "YDL006W"; transcript_id "YDL006W"; exon_number "1"; gene_name "PTC1"; gene_source "ensembl"; gene_biotype "protein_coding"; transcript_name "PTC1"; transcript_source "ensembl"; transcript_biotype "protein_coding";
IV	ensembl	gene	441014	442309	.	-	.	gene_id "YDL005C"; gene_name "MED2"; gene_source "ensembl"; gene_biotype "protein_coding";
IV	ensembl	transcript	441014	442309	.	-	.	gene_id "YDL005C"; transcript_id "YDL005C"; gene_name "MED2"; gene_source "ensembl"; gene_biotype "protein_coding"; transcript_name "MED2"; transcript_source "ensembl"; transcript_biotype "protein_coding";
IV	ensembl	exon	441014	442309	.	-	.	gene_id "YDL005C"; transcript_id "YDL005C"; exon_number "1"; gene_name "MED2"; gene_source "ensembl"; gene_biotype "protein_coding"; transcript_name "MED2"; transcript_source "ensembl"; transcript_biotype "protein_coding"; exon_id "YDL005C.1";
IV	ensembl	CDS	441017	442309	.	-	0	gene_id "YDL005C"; transcript_id "YDL005C"; exon_number "1"; gene_name "MED2"; gene_source "ensembl"; gene_biotype "protein_coding"; transcript_name "MED2"; transcript_source "ensembl"; transcript_biotype "protein_coding"; protein_id "YDL005C";
IV	ensembl	start_codon	442307	442309	.	-	0	gene_id "YDL005C"; transcript_id "YDL005C"; exon_number "1"; gene_name "MED2"; gene_source "ensembl"; gene_biotype "protein_coding"; transcript_name "MED2"; transcript_source "ensembl"; transcript_biotype "protein_coding";
IV	ensembl	stop_codon	441014	441016	.	-	0	gene_id "YDL005C"; transcript_id "YDL005C"; exon_number "1"; gene_name "MED2"; gene_source "ensembl"; gene_biotype "protein_coding"; transcript_name "MED2"; transcript_source "ensembl"; transcript_biotype "protein_coding";
IV	ensembl	gene	443029	443511	.	+	.	gene_id "YDL004W"; gene_name "ATP16"; gene_source "ensembl"; gene_biotype "protein_coding";
IV	ensembl	transcript	443029	443511	.	+	.	gene_id "YDL004W"; transcript_id "YDL004W"; gene_name "ATP16"; gene_source "ensembl"; gene_biotype "protein_coding"; transcript_name "ATP16"; transcript_source "ensembl"; transcript_biotype "protein_coding";
IV	ensembl	exon	443029	443511	.	+	.	gene_id "YDL004W"; transcript_id "YDL004W"; exon_number "1"; gene_name "ATP16"; gene_source "ensembl"; gene_biotype "protein_coding"; transcript_name "ATP16"; transcript_source "ensembl"; transcript_biotype "protein_coding"; exon_id "YDL004W.1";
IV	ensembl	CDS	443029	443508	.	+	0	gene_id "YDL004W"; transcript_id "YDL004W"; exon_number "1"; gene_name "ATP16"; gene_source "ensembl"; gene_biotype "protein_coding"; transcript_name "ATP16"; transcript_source "ensembl"; transcript_biotype "protein_coding"; protein_id "YDL004W";
IV	ensembl	start_codon	443029	443031	.	+	0	gene_id "YDL004W"; transcript_id "YDL004W"; exon_number "1"; gene_name "ATP16"; gene_source "ensembl"; gene_biotype "protein_coding"; transcript_name "ATP16"; transcript_source "ensembl"; transcript_biotype "protein_coding";
IV	ensembl	stop_codon	443509	443511	.	+	0	gene_id "YDL004W"; transcript_id "YDL004W"; exon_number "1"; gene_name "ATP16"; gene_source "ensembl"; gene_biotype "protein_coding"; transcript_name "ATP16"; transcript_source "ensembl"; transcript_biotype "protein_coding";
IV	ensembl	gene	444683	446383	.	+	.	gene_id "YDL003W"; gene_name "MCD1"; gene_source "ensembl"; gene_biotype "protein_coding";
IV	ensembl	transcript	444683	446383	.	+	.	gene_id "YDL003W"; transcript_id "YDL003W"; gene_name "MCD1"; gene_source "ensembl"; gene_biotype "protein_coding"; transcript_name "MCD1"; transcript_source "ensembl"; transcript_biotype "protein_coding";
IV	ensembl	exon	444683	446383	.	+	.	gene_id "YDL003W"; transcript_id "YDL003W"; exon_number "1"; gene_name "MCD1"; gene_source "ensembl"; gene_biotype "protein_coding"; transcript_name "MCD1"; transcript_source "ensembl"; transcript_biotype "protein_coding"; exon_id "YDL003W.1";
IV	ensembl	CDS	444683	446380	.	+	0	gene_id "YDL003W"; transcript_id "YDL003W"; exon_number "1"; gene_name "MCD1"; gene_source "ensembl"; gene_biotype "protein_coding"; transcript_name "MCD1"; transcript_source "ensembl"; transcript_biotype "protein_coding"; protein_id "YDL003W";
IV	ensembl	start_codon	444683	444685	.	+	0	gene_id "YDL003W"; transcript_id "YDL003W"; exon_number "1"; gene_name "MCD1"; gene_source "ensembl"; gene_biotype "protein_coding"; transcript_name "MCD1"; transcript_source "ensembl"; transcript_biotype "protein_coding";
IV	ensembl	stop_codon	446381	446383	.	+	0	gene_id "YDL003W"; transcript_id "YDL003W"; exon_number "1"; gene_name "MCD1"; gene_source "ensembl"; gene_biotype "protein_coding"; transcript_name "MCD1"; transcript_source "ensembl"; transcript_biotype "protein_coding";
IV	ensembl	gene	446967	447578	.	-	.	gene_id "YDL002C"; gene_name "NHP10"; gene_source "ensembl"; gene_biotype "protein_coding";
IV	ensembl	transcript	446967	447578	.	-	.	gene_id "YDL002C"; transcript_id "YDL002C"; gene_name "NHP10"; gene_source "ensembl"; gene_biotype "protein_coding"; transcript_name "NHP10"; transcript_source "ensembl"; transcript_biotype "protein_coding";
IV	ensembl	exon	446967	447578	.	-	.	gene_id "YDL002C"; transcript_id "YDL002C"; exon_number "1"; gene_name "NHP10"; gene_source "ensembl"; gene_biotype "protein_coding"; transcript_name "NHP10"; transcript_source "ensembl"; transcript_biotype "protein_coding"; exon_id "YDL002C.1";
IV	ensembl	CDS	446970	447578	.	-	0	gene_id "YDL002C"; transcript_id "YDL002C"; exon_number "1"; gene_name "NHP10"; gene_source "ensembl"; gene_biotype "protein_coding"; transcript_name "NHP10"; transcript_source "ensembl"; transcript_biotype "protein_coding"; protein_id "YDL002C";
IV	ensembl	start_codon	447576	447578	.	-	0	gene_id "YDL002C"; transcript_id "YDL002C"; exon_number "1"; gene_name "NHP10"; gene_source "ensembl"; gene_biotype "protein_coding"; transcript_name "NHP10"; transcript_source "ensembl"; transcript_biotype "protein_coding";
IV	ensembl	stop_codon	446967	446969	.	-	0	gene_id "YDL002C"; transcript_id "YDL002C"; exon_number "1"; gene_name "NHP10"; gene_source "ensembl"; gene_biotype "protein_coding"; transcript_name "NHP10"; transcript_source "ensembl"; transcript_biotype "protein_coding";
IV	ensembl	gene	447984	449276	.	+	.	gene_id "YDL001W"; gene_name "RMD1"; gene_source "ensembl"; gene_biotype "protein_coding";
IV	ensembl	transcript	447984	449276	.	+	.	gene_id "YDL001W"; transcript_id "YDL001W"; gene_name "RMD1"; gene_source "ensembl"; gene_biotype "protein_coding"; transcript_name "RMD1"; transcript_source "ensembl"; transcript_biotype "protein_coding";
IV	ensembl	exon	447984	449276	.	+	.	gene_id "YDL001W"; transcript_id "YDL001W"; exon_number "1"; gene_name "RMD1"; gene_source "ensembl"; gene_biotype "protein_coding"; transcript_name "RMD1"; transcript_source "ensembl"; transcript_biotype "protein_coding"; exon_id "YDL001W.1";
IV	ensembl	CDS	447984	449273	.	+	0	gene_id "YDL001W"; transcript_id "YDL001W"; exon_number "1"; gene_name "RMD1"; gene_source "ensembl"; gene_biotype "protein_coding"; transcript_name "RMD1"; transcript_source "ensembl"; transcript_biotype "protein_coding"; protein_id "YDL001W";
IV	ensembl	start_codon	447984	447986	.	+	0	gene_id "YDL001W"; transcript_id "YDL001W"; exon_number "1"; gene_name "RMD1"; gene_source "ensembl"; gene_biotype "protein_coding"; transcript_name "RMD1"; transcript_source "ensembl"; transcript_biotype "protein_coding";
IV	ensembl	stop_codon	449274	449276	.	+	0	gene_id "YDL001W"; transcript_id "YDL001W"; exon_number "1"; gene_name "RMD1"; gene_source "ensembl"; gene_biotype "protein_coding"; transcript_name "RMD1"; transcript_source "ensembl"; transcript_biotype "protein_coding";
IV	ensembl	gene	450220	452475	.	-	.	gene_id "YDR001C"; gene_name "NTH1"; gene_source "ensembl"; gene_biotype "protein_coding";
IV	ensembl	transcript	450220	452475	.	-	.	gene_id "YDR001C"; transcript_id "YDR001C"; gene_name "NTH1"; gene_source "ensembl"; gene_biotype "protein_coding"; transcript_name "NTH1"; transcript_source "ensembl"; transcript_biotype "protein_coding";
IV	ensembl	exon	450220	452475	.	-	.	gene_id "YDR001C"; transcript_id "YDR001C"; exon_number "1"; gene_name "NTH1"; gene_source "ensembl"; gene_biotype "protein_coding"; transcript_name "NTH1"; transcript_source "ensembl"; transcript_biotype "protein_coding"; exon_id "YDR001C.1";
IV	ensembl	CDS	450223	452475	.	-	0	gene_id "YDR001C"; transcript_id "YDR001C"; exon_number "1"; gene_name "NTH1"; gene_source "ensembl"; gene_biotype "protein_coding"; transcript_name "NTH1"; transcript_source "ensembl"; transcript_biotype "protein_coding"; protein_id "YDR001C";
IV	ensembl	start_codon	452473	452475	.	-	0	gene_id "YDR001C"; transcript_id "YDR001C"; exon_number "1"; gene_name "NTH1"; gene_source "ensembl"; gene_biotype "protein_coding"; transcript_name "NTH1"; transcript_source "ensembl"; transcript_biotype "protein_coding";
IV	ensembl	stop_codon	450220	450222	.	-	0	gene_id "YDR001C"; transcript_id "YDR001C"; exon_number "1"; gene_name "NTH1"; gene_source "ensembl"; gene_biotype "protein_coding"; transcript_name "NTH1"; transcript_source "ensembl"; transcript_biotype "protein_coding";
IV	ensembl	gene	453045	453650	.	+	.	gene_id "YDR002W"; gene_name "YRB1"; gene_source "ensembl"; gene_biotype "protein_coding";
IV	ensembl	transcript	453045	453650	.	+	.	gene_id "YDR002W"; transcript_id "YDR002W"; gene_name "YRB1"; gene_source "ensembl"; gene_biotype "protein_coding"; transcript_name "YRB1"; transcript_source "ensembl"; transcript_biotype "protein_coding";
IV	ensembl	exon	453045	453650	.	+	.	gene_id "YDR002W"; transcript_id "YDR002W"; exon_number "1"; gene_name "YRB1"; gene_source "ensembl"; gene_biotype "protein_coding"; transcript_name "YRB1"; transcript_source "ensembl"; transcript_biotype "protein_coding"; exon_id "YDR002W.1";
IV	ensembl	CDS	453045	453647	.	+	0	gene_id "YDR002W"; transcript_id "YDR002W"; exon_number "1"; gene_name "YRB1"; gene_source "ensembl"; gene_biotype "protein_coding"; transcript_name "YRB1"; transcript_source "ensembl"; transcript_biotype "protein_coding"; protein_id "YDR002W";
IV	ensembl	start_codon	453045	453047	.	+	0	gene_id "YDR002W"; transcript_id "YDR002W"; exon_number "1"; gene_name "YRB1"; gene_source "ensembl"; gene_biotype "protein_coding"; transcript_name "YRB1"; transcript_source "ensembl"; transcript_biotype "protein_coding";
IV	ensembl	stop_codon	453648	453650	.	+	0	gene_id "YDR002W"; transcript_id "YDR002W"; exon_number "1"; gene_name "YRB1"; gene_source "ensembl"; gene_biotype "protein_coding"; transcript_name "YRB1"; transcript_source "ensembl"; transcript_biotype "protein_coding";
IV	ensembl	gene	454122	454754	.	+	.	gene_id "YDR003W"; gene_name "RCR2"; gene_source "ensembl"; gene_biotype "protein_coding";
IV	ensembl	transcript	454122	454754	.	+	.	gene_id "YDR003W"; transcript_id "YDR003W"; gene_name "RCR2"; gene_source "ensembl"; gene_biotype "protein_coding"; transcript_name "RCR2"; transcript_source "ensembl"; transcript_biotype "protein_coding";
IV	ensembl	exon	454122	454754	.	+	.	gene_id "YDR003W"; transcript_id "YDR003W"; exon_number "1"; gene_name "RCR2"; gene_source "ensembl"; gene_biotype "protein_coding"; transcript_name "RCR2"; transcript_source "ensembl"; transcript_biotype "protein_coding"; exon_id "YDR003W.1";
IV	ensembl	CDS	454122	454751	.	+	0	gene_id "YDR003W"; transcript_id "YDR003W"; exon_number "1"; gene_name "RCR2"; gene_source "ensembl"; gene_biotype "protein_coding"; transcript_name "RCR2"; transcript_source "ensembl"; transcript_biotype "protein_coding"; protein_id "YDR003W";
IV	ensembl	start_codon	454122	454124	.	+	0	gene_id "YDR003W"; transcript_id "YDR003W"; exon_number "1"; gene_name "RCR2"; gene_source "ensembl"; gene_biotype "protein_coding"; transcript_name "RCR2"; transcript_source "ensembl"; transcript_biotype "protein_coding";
IV	ensembl	stop_codon	454752	454754	.	+	0	gene_id "YDR003W"; transcript_id "YDR003W"; exon_number "1"; gene_name "RCR2"; gene_source "ensembl"; gene_biotype "protein_coding"; transcript_name "RCR2"; transcript_source "ensembl"; transcript_biotype "protein_coding";
IV	ensembl	gene	454782	454904	.	+	.	gene_id "YDR003W-A"; gene_source "ensembl"; gene_biotype "protein_coding";
IV	ensembl	transcript	454782	454904	.	+	.	gene_id "YDR003W-A"; transcript_id "YDR003W-A"; gene_source "ensembl"; gene_biotype "protein_coding"; transcript_name "YDR003W-A"; transcript_source "ensembl"; transcript_biotype "protein_coding";
IV	ensembl	exon	454782	454904	.	+	.	gene_id "YDR003W-A"; transcript_id "YDR003W-A"; exon_number "1"; gene_source "ensembl"; gene_biotype "protein_coding"; transcript_name "YDR003W-A"; transcript_source "ensembl"; transcript_biotype "protein_coding"; exon_id "YDR003W-A.1";
IV	ensembl	CDS	454782	454901	.	+	0	gene_id "YDR003W-A"; transcript_id "YDR003W-A"; exon_number "1"; gene_source "ensembl"; gene_biotype "protein_coding"; transcript_name "YDR003W-A"; transcript_source "ensembl"; transcript_biotype "protein_coding"; protein_id "YDR003W-A";
IV	ensembl	start_codon	454782	454784	.	+	0	gene_id "YDR003W-A"; transcript_id "YDR003W-A"; exon_number "1"; gene_source "ensembl"; gene_biotype "protein_coding"; transcript_name "YDR003W-A"; transcript_source "ensembl"; transcript_biotype "protein_coding";
IV	ensembl	stop_codon	454902	454904	.	+	0	gene_id "YDR003W-A"; transcript_id "YDR003W-A"; exon_number "1"; gene_source "ensembl"; gene_biotype "protein_coding"; transcript_name "YDR003W-A"; transcript_source "ensembl"; transcript_biotype "protein_coding";
IV	ensembl	gene	455201	456583	.	+	.	gene_id "YDR004W"; gene_name "RAD57"; gene_source "ensembl"; gene_biotype "protein_coding";
IV	ensembl	transcript	455201	456583	.	+	.	gene_id "YDR004W"; transcript_id "YDR004W"; gene_name "RAD57"; gene_source "ensembl"; gene_biotype "protein_coding"; transcript_name "RAD57"; transcript_source "ensembl"; transcript_biotype "protein_coding";
IV	ensembl	exon	455201	456583	.	+	.	gene_id "YDR004W"; transcript_id "YDR004W"; exon_number "1"; gene_name "RAD57"; gene_source "ensembl"; gene_biotype "protein_coding"; transcript_name "RAD57"; transcript_source "ensembl"; transcript_biotype "protein_coding"; exon_id "YDR004W.1";
IV	ensembl	CDS	455201	456580	.	+	0	gene_id "YDR004W"; transcript_id "YDR004W"; exon_number "1"; gene_name "RAD57"; gene_source "ensembl"; gene_biotype "protein_coding"; transcript_name "RAD57"; transcript_source "ensembl"; transcript_biotype "protein_coding"; protein_id "YDR004W";
IV	ensembl	start_codon	455201	455203	.	+	0	gene_id "YDR004W"; transcript_id "YDR004W"; exon_number "1"; gene_name "RAD57"; gene_source "ensembl"; gene_biotype "protein_coding"; transcript_name "RAD57"; transcript_source "ensembl"; transcript_biotype "protein_coding";
[truncated: 40,431 more rows]
