# Supplementary material for: Workflow for Genome-Wide Determination of Pre-mRNA Splicing Efficiency from Yeast RNA-seq Data
Source: Biomed Res Int. 2016 Dec 6;2016:4783841. doi: 10.1155/2016/4783841 (PMC5168555; doi:10.1155/2016/4783841)
Supplement: Supplementary file 1 — The Supplementary Material contains a table of PCR primers used in this study, and all scripts required to run the analyses of splicing efficiency presented in Figures 2 and 3. The scripts are commented and can be easily adapted for other RNA-seq datasets. An adaptation of the workflow for processing RNA-seq data from the fission yeast Schizosaccharomyces pombe is also included. [file 4783841.f1.zip › prp4/genome/Saccharomyces_cerevisiae.R64-1-1.dna.chromosome.I.fa]

>I dna:chromosome chromosome:R64-1-1:I:1:230218:1 REF
CCACACCACACCCACACACCCACACACCACACCACACACCACACCACACCCACACACACA
CATCCTAACACTACCCTAACACAGCCCTAATCTAACCCTGGCCAACCTGTCTCTCAACTT
ACCCTCCATTACCCTGCCTCCACTCGTTACCCTGTCCCATTCAACCATACCACTCCGAAC
CACCATCCATCCCTCTACTTACTACCACTCACCCACCGTTACCCTCCAATTACCCATATC
CAACCCACTGCCACTTACCCTACCATTACCCTACCATCCACCATGACCTACTCACCATAC
TGTTCTTCTACCCACCATATTGAAACGCTAACAAATGATCGTAAATAACACACACGTGCT
TACCCTACCACTTTATACCACCACCACATGCCATACTCACCCTCACTTGTATACTGATTT
TACGTACGCACACGGATGCTACAGTATATACCATCTCAAACTTACCCTACTCTCAGATTC
CACTTCACTCCATGGCCCATCTCTCACTGAATCAGTACCAAATGCACTCACATCATTATG
CACGGCACTTGCCTCAGCGGTCTATACCCTGTGCCATTTACCCATAACGCCCATCATTAT
CCACATTTTGATATCTATATCTCATTCGGCGGTCCCAAATATTGTATAACTGCCCTTAAT
ACATACGTTATACCACTTTTGCACCATATACTTACCACTCCATTTATATACACTTATGTC
AATATTACAGAAAAATCCCCACAAAAATCACCTAAACATAAAAATATTCTACTTTTCAAC
AATAATACATAAACATATTGGCTTGTGGTAGCAACACTATCATGGTATCACTAACGTAAA
AGTTCCTCAATATTGCAATTTGCTTGAACGGATGCTATTTCAGAATATTTCGTACTTACA
CAGGCCATACATTAGAATAATATGTCACATCACTGTCGTAACACTCTTTATTCACCGAGC
AATAATACGGTAGTGGCTCAAACTCATGCGGGTGCTATGATACAATTATATCTTATTTCC
ATTCCCATATGCTAACCGCAATATCCTAAAAGCATAACTGATGCATCTTTAATCTTGTAT
GTGACACTACTCATACGAAGGGACTATATCTAGTCAAGACGATACTGTGATAGGTACGTT
ATTTAATAGGATCTATAACGAAATGTCAAATAATTTTACGGTAATATAACTTATCAGCGG
CGTATACTAAAACGGACGTTACGATATTGTCTCACTTCATCTTACCACCCTCTATCTTAT
TGCTGATAGAACACTAACCCCTCAGCTTTATTTCTAGTTACAGTTACACAAAAAACTATG
CCAACCCAGAAATCTTGATATTTTACGTGTCAAAAAATGAGGGTCTCTAAATGAGAGTTT
GGTACCATGACTTGTAACTCGCACTGCCCTGATCTGCAATCTTGTTCTTAGAAGTGACGC
ATATTCTATACGGCCCGACGCGACGCGCCAAAAAATGAAAAACGAAGCAGCGACTCATTT
TTATTTAAGGACAAAGGTTGCGAAGCCGCACATTTCCAATTTCATTGTTGTTTATTGGAC
ATACACTGTTAGCTTTATTACCGTCCACGTTTTTTCTACAATAGTGTAGAAGTTTCTTTC
TTATGTTCATCGTATTCATAAAATGCTTCACGAACACCGTCATTGATCAAATAGGTCTAT
AATATTAATATACATTTATATAATCTACGGTATTTATATCATCAAAAAAAAGTAGTTTTT
TTATTTTATTTTGTTCGTTAATTTTCAATTTCTATGGAAACCCGTTCGTAAAATTGGCGT
TTGTCTCTAGTTTGCGATAGTGTAGATACCGTCCTTGGATAGAGCACTGGAGATGGCTGG
CTTTAATCTGCTGGAGTACCATGGAACACCGGTGATCATTCTGGTCACTTGGTCTGGAGC
AATACCGGTCAACATGGTGGTGAAGTCACCGTAGTTGAAAACGGCTTCAGCAACTTCGAC
TGGGTAGGTTTCAGTTGGGTGGGCGGCTTGGAACATGTAGTATTGGGCTAAGTGAGCTCT
GATATCAGAGACGTAGACACCCAATTCCACCAAGTTGACTCTTTCGTCAGATTGAGCTAG
AGTGGTGGTTGCAGAAGCAGTAGCAGCGATGGCAGCGACACCAGCGGCGATTGAAGTTAA
TTTGACCATTGTATTTGTTTTGTTTGTTAGTGCTGATATAAGCTTAACAGGAAAGGAAAG
AATAAAGACATATTCTCAAAGGCATATAGTTGAAGCAGCTCTATTTATACCCATTCCCTC
ATGGGTTGTTGCTATTTAAACGATCGCTGACTGGCACCAGTTCCTCATCAAATATTCTCT
ATATCTCATCTTTCACACAATCTCATTATCTCTATGGAGATGCTCTTGTTTCTGAACGAA
TCATAAATCTTTCATAGGTTTCGTATGTGGAGTACTGTTTTATGGCGCTTATGTGTATTC
GTATGCGCAGAATGTGGGAATGCCAATTATAGGGGTGCCGAGGTGCCTTATAAAACCCTT
TTCTGTGCCTGTGACATTTCCTTTTTCGGTCAAAAAGAATATCCGAATTTTAGATTTGGA
CCCTCGTACAGAAGCTTATTGTCTAAGCCTGAATTCAGTCTGCTTTAAACGGCTTCCGCG
GAGGAAATATTTCCATCTCTTGAATTCGTACAACATTAAACGTGTGTTGGGAGTCGTATA
CTGTTAGGGTCTGTAAACTTGTGAACTCTCGGCAAATGCCTTGGTGCAATTACGTAATTT
TAGCCGCTGAGAAGCGGATGGTAATGAGACAAGTTGATATCAAACAGATACATATTTAAA
AGAGGGTACCGCTAATTTAGCAGGGCAGTATTATTGTAGTTTGATATGTACGGCTAACTG
AACCTAAGTAGGGATATGAGAGTAAGAACGTTCGGCTACTCTTCTTTCTAAGTGGGATTT
TTCTTAATCCTTGGATTCTTAAAAGGTTATTAAAGTTCCGCACAAAGAACGCTTGGAAAT
CGCATTCATCAAAGAACAACTCTTCGTTTTCCAAACAATCTTCCCGAAAAAGTAGCCGTT
CATTTCCCTTCCGATTTCATTCCTAGACTGCCAAATTTTTCTTGCTCATTTATAATGATT
GATAAGAATTGTATTTGTGTCCCATTCTCGTAGATAAAATTCTTGGATGTTAAAAAATTA
TTATTTTCTTCATAAAGAAGCTTTCAAGATATAAGATACGAAATAGGGGTTGATAATTGC
ATGACAGTAGCTTTAGATCAAAAAGGAAAGCATGGAGGGAAACAGTAAACAGTGAAAATT
CTCTTGAGAACCAAAGTAAACCTTCATTGAAGAGCTTCCTTAAAAAATTTAGAATCTCCC
ATGTCAACGGGTTTCCATACCTCCCCAGCATCATACATCTTTTTTCAAAGAAACTTCAAA
TGCCTCTTTTATGCAAGGGGCAAAATCCTGAAATGACTTAAACTTAGCAGTTTCGTCTTT
TTTCAAAGAGAATGGTTGAAGAAGAATTGTTTTGGACGCTTATTGACAATCTGTTGCATT
GATAAAGTACCTACTATCCCAGACTATATTTGTATACAAGTACAAAATTAGGTTTGTTGA
AACAACTTTCCGATCATTGGTGCCCGTATCTGATGTTTTTTTAGTAATTTCTTTGTAAAT
ACAGGGAGTTGTTTCGAAAGCTTATGAGAAAAATACATGAATGACAGGTAAAAATATTGG
CTCGAAAAAGAGGACAAAAAGAGAAATCATAAATGAGTAAACCCACTTGCTGGACATTAT
CCAGTAAAGGCTTGGTAGTAACCATAATATTACCCAGGTACGAAACGCTAAGAACTTGAA
AGACTCATAAAACTTCCAGGTTAAGCTATTTTTGAAAATATTCTGAGGTAAAAGCCATTA
AGGTCCAGATAACCAAGGGACAATAAACCTATGCTTTTCTTGTCTTCAATTTCAGTATCT
TTCCATTTTGATAATGAGCTAGTGATCCGGAAAGCTACTTTATGATGTTTCAAGGCCTGA
AGTTTGAATATTTATGTAGTTCAACATCAAATGTGTCTATTTTGTGATGAGGCAACCGTC
GACAACCTTATTATCGAAAAAGAACAACAAGTTCACATGCTTGTTACTCTCTATAACTAG
AGAGTACTTTTTTTGGAAGCAAGTAAGAATAAGTCAATTTCTACTTACCTCATTAGGGAA
AAATTTAATAGCAGTTGTTATAACGACAAATACAGGCCCTAAAAAATTCACTGTATTCAA
TGGTCTACGAATCGTCAATCGCTTGCGGTTATGGCACGAAGAACAATGCAATAGCTCTTA
CAAGCCACTACATGACAAGCAACTCATAATTTAAGTGGATAGCTTGTGATAAATTGAATT
TTCTCTGTTTAGTACTTGCCGAATAGTTACTTGTTAGTTGCAGATGCTTTTTGATGACAA
AGTTATCAATCTCAATATTAAACTTTTTAGGCTTTCAGGTTTAATCTTTCTTTGAGGGTG
TATTAATTTTCATACAAATATTTGATTCATTATTCGTTTTACTGTTACATTAGACCTGCT
CATTACATGGAGTAACTTAAGTTTTCTCAAACGCTTGATAGCATGATTTGATGTAGTAAA
AAAAAAGGCAGAGTTTCCAAAAAAAATTGTTAATCGACAAAGTTAATATTATGGTGGTAG
TATCTCAAATATCTGGATAACCAGATCGTACATCTCTGATAAACAATCTTTGCCACTGCT
TTATCCTTTTAAATTGTATTGAGTGCTTCAGTCATTGCAAAATTTTACGAGATTTAAAAT
TTGTGAACCCGACCTTACCGAGAAATGATGAGCTAATTTTTATAGGTCGACCCTTCTGTC
GCTTACTGGGTTGATTATCTTGTGCTTTCTTAGTATCTATCACAAAGGAGACAAAATCGT
TGATAAAAAGTGCATCAACATTCCCAGCCAGAAAATGCACATCATAAAGACATGTTATTC
AAGAGCCACGACCGTCTTCAATTTATCTTTTATAAAAAACCCTTGTTCTACTGACAGGAT
GGAATAGATATTAAATATACATTTTGCATTTTTTTTTTTTTCTGTATTGAAGATTTGTAT
ATGAAAGATGTTTATACATCAAATGCTTTGAATAAAGCCATCTTAATTTCAATTTCATGC
CCTCCTTCACCGTTTTCTGTTGGTCTAGAGGTAGCTTGTTGTGGTCACTAATGAGAACTT
AAATAGTTTTCAACTGCTGGTGATAAATCAATAATTTATGTTCTTAACCTAACATTTGAT
GACCTTTGATGCGTTGGTTATGTTGAAGACAAATTGCCTCTAATCAGTTCCATTAAGAAA
TCTTCTTAACTCCTCCAAATATTCTGCCCATACGATACCTATTTGTTTACTTTGTCATTT
TGCCATAAGATTGGTATCCACTTCTTGTCTGTAAAATAATTAGAAAGTAGCACAATTTTT
ACAGTAATGTAGCACGCGTAACTCCTAAACTTTGTCATAATGGTTGAAATGAATGTATGA
TATAAAAACTCGGACCCTGTTTTACTTCTTTTATAGAACCTTATTTTTGACGCAGGGAGG
CGACATTTATCCAAATTAAGTTTTGACATGGCGCATCAGGGAATAAAAAAAACTTTATTA
TGTGGCCGAATCAACATTAATCAAATGCACTAATATTGTAACGTTCTTACAAAGGGCAGA
CAACTTGAGAACTTTCATGCGTGCAACAGTATTAATATTTTACTGTCTTGATATCGTTAT
CCTCATCGTAACGTGAATTTTTTTGTCTCATACGTTAAGGTAAATTTTGATGACCCCCGT
TGTCCTTGTTTGCCTTACTGTATAAAGCACCCTTTTATTGTTTAGAATACTAGAATGATA
ACTGCATTCGGACTATGAAAGAAAAAATGGTAGTAGCAAAGGATAGGCATCGCCGTATTT
ACTACTTTGTAAACCAGTGGATTTTTGCTCAACATATAAAAAACTAAAGACCTTTTTTTC
ATCAATATACTTCTGAGACGTGCAGATGTGATATTCGGGTTTGAGCTTGTAGTCAACGAA
GCGGGTTCATGGGCAAATTTTCTTTTTTTTCCCTTTTTTTTTGTCTAGATTATTTCGAAT
ATGAGTTAATCATACGTTGATTAGTACTGTTGGTCTCTCATTGAAATTTTACGTGACACC
ATCATTTTACTTCCACATAAGTTCTAATGTTACGTAGTTCAATTTTAGTCGACCTAGCTT
CATATTTATTTTAGAAGCAATTCGTAATTATCATTTTGCTTTCGAAGAAAATTAAGACTT
CATTTACTATTCTCGTGATATTTTAGTAGGCGCTTCTTTTGTATCGAACCATTTTATTGC
AATGGCCCTTAAGTTACCGTTATTCATACCAATTTGACGTTAATTTTAAATGCGTTCTGA
AGTTTCTTAAATAACCCGGATTGGTTAGGTTCAGCCATGCCTGGCGCGTACATTGAGGCA
TTAGAAGATCCGCAGATAAATAATAAGCTTAGTAAATCCTAAAGATAACAACTAAAATTA
TATTTCCATCAGCTCAATACCGCAGTACTTTGAAACCTGATTTATATATTGCAGAACTTA
ATTAAAAGTACATTGTAGTTCAAAAAATAAATATCAAACTTTTGGACCCTCTCTTATTGC
CTCCCAATTAATTAAAACATCTTTTCTTCCAATCTACAGGTTTGAAAAGGTAATAAGTAA
TATAAACTTGAGAACCAAAAAAAAAAAAAAAAAAATACTGATCCTTACAGGTTTTAAGGT
TGCAAAGGGAACATTTATTGAAAGGAGCTAACAATAGTGGGTATGAGTAAAGATATATAG
ATCGATATTTTGAATTCTAAATGATGAACTAGGGAAGTAATTTAGGTGAAACATTGCAAC
CAATCATTTTACACTTTTGGTTGCACGTAATGTACCTTTTTATGATATTTTTTTTTTATA
GTAGTAGTGTGAAAATTTCTTCAGGACTTGCAAAAAGAATCTAACTGATCTTCGGATGAG
CCTTTATCGATTATTTTTTTCCTAAATATAATACTTTACAAGCGAATGTTTTGTTAGGAG
AAAGATATAAAAATTATGCGGCATAGGCATATTATCCAATAAAAAGGAAATTTATATATA
AACTTCATTTACGTCATAAGAAAATGTTAAGTTCTCTTAACGAAAACTGTGCGAATTTTG
TGTTAAAGCTGGATGATGAGAAATTATTCTCGTATTATTTTTCATCAGATACTGATAAGG
TTTCAACGTCTTTTGACGTTGGCTTTTCCACACCATGTTTAGAGTTATAAAGCACAATAC
CGTTCTTCTTGGCATTGTTCCTTTCATCACGTTTATAGAAGTAGAGTACAACAAAAGTCC
AAATGGAGAGACAAAAAGCAGAACATGCAGTGAAAGTAAACCCCTTTAAATACCTGGGAG
CTTCTTCTGTTTTCCAAACCAAAACACTTATCCATGCGGTAGATGATTGAGCCATAATAT
TCATTGTAACTAAAGTAATAGCTCTAGTTTGAGCATCTCGGCGACAAATATCGTTTTGCC
AAGAGTATAAAACAGGAGCCATAGCCCAACCAAAACATTGCAGCATAAATGCAAACCATT
TGGCTCCTTCTGCGACGTCCCAAGCGGCTAATATGGAGTTACCAATGATATTGAAAACCT
GAGTAAAAATAATCGCAAACCAACGAGAGTGTAATTTATCTGCAATAATACCAGTAAGCA
TCAAATAAACCATACCTAAACCCGGAGTAATCATGGATAACTGATTGAGCTTAGGAATAG
AGTATCTTTTCAAAGATTTCAACCATAGTAGGTATGCCCCAGATGAAACATTACTGTCAT
TCCAACAGAAAATATTCCATAAAGTTAAAATGTATATTTTCCAATCACTGAAAATTGTTT
TCCACAGTTTAATATCGAATACTTTTGTTTCAAAATCACTTTTACCTGTTTGGTTTTCTT
TTAATCTTTTCCTCGCCAACCTAATTTCATCATCAGTTAAGAAAATAGAATAACAGTTGT
ATGGGTCACCTGGCAGGGAGTAAAATCCAATAAGGCCCACTACGACAGACACAATAGCGT
CAATAATAAAGTTCCATCTCCATCCCTCTAAACCATTTACACCATTTAACGATGAATATA
CGGCTGACTGGATCCCACCAGCGGATAGAATACCGATATACTGGCCCAAATAGTAAAAAG
CAGAACGACGCACCATTTCATCATGTTTGTAAAAGGAACCAAACAAATATTGGTATGCCA
AATAACTTGGCGCTTCAAAAGCCCCAATGAAAAACCTAATTGCTTTCAAGTGTGGTACAG
AATTGACATATGCAGCACCAACGGTTAAAAGCGACCAACATAAGTCGAGGCTTGGTAAAA
CATAGTTTAATGGGAGCTTGTTCAGGTAAATCAAAAATGGCAATTGAAATATAATATTAC
CAACTGTGTACATTACTTGAGTATGCACCAAATCATTACCTTGAAAGCCTAAATCTTCCT
TCATTCCCGAAACGTAAGCGTTGTTTATATTAACCGTATCCAGATATTTCACCCAATAAG
CAATACAAGAATAAAAGGCTAAAAGGACATCCAATTTAATTAATAATTTTTTTTCTTTGA
AAGAGGTACCCTGTTTGAACCAACTATACCATTTATTGTGAGATCTTTCCTTTTCATTGA
TCCGATACTCTTGTTCATCGAAAAATCTCCACCATGGCCTATCGGCTTCATCTCTATATT
CATAACTTCTAGTAACGTTCACATTGTCTTTATGTTCACTATAGCTACTAGTCTCAAAAT
GTAGTTGATCTTTTTCACTTGTAGTCGTGATGAAATTTTCAGCTGTTTCATGACTCTGGA
TACTGTTGGAGATAGTGACAATTTCTGTTGAATTTAAGTCATCTGGCAGGTCTTCCACCT
GCCGCTTTACTGGAATAAAACCCCATTTTAGTCTTTTGTAAGGATCTACAATAATCTCTT
TAACAATTGAATACATGTATGTTATTTATATATGCAGTAGTTCTCTTTGTAATTTTTTTT
AACAAATAGAGAGTAAGATATGTAGCGAATGTCCATTCATCATAACAGGTAAACTAGATG
CTCTTTTATATAGTCTGGTTGTATAAATAATTTATATCCTCATCTAAACGCATGTCTCCG
CTTGGTTTCTTATCTATTTGTGGAGGCACCCGTAGTACTGTGCTTTCGTATTTTTTTATT
TATTTATTATTTGTAGCAGTTTTTTTCCAGTGACACAATCTTTACCATTACACAGTTTTT
ACTATTTCTAATGATTACATTGGACCATCGGAAAACTGCGCTAACTTTGGATAACGCCAC
AGAACGTGATCTGACTATTGTAAAGGTGTCATTCGGTAAGGTAAACCTTCAAGGCGTCCA
CACCTTTAACCATATAACAGCGTAAACTCTTGTTAAAATACAGGGGTAAGACATTGGTGG
ATATTCAACAAGATCCGATACCTCCAATTCCGATTTCTACAAATTGTGCTCTACATATTA
CTGCGATGCAATTATCCACACATAAAATCGATGCCTTTAGAAAAAGACATAAAGCAGACG
GCATTGTAGATATTTGACCAATTAGAATTGAATGAGATGAATATCTCACCAAGCTATTCG
ATATTATAGATAAAGTTTGTATCTTAGTTATGCATTGTGAGTTGGTTGCTCTACTCGCGG
TTACCAGTCTCTTCTAAAAAATCTAAGGCCAATGGTATCCATGACATTTCTGCACTTTTT
GTAATTGGTTTAGTTATGAAAGGAACGTCAAACCAAATGGTTTTTCAGATAAGAAATTGA
CAGTATCTGAGAATTTGCTATCAAAGCTCAGAGGATTTACATATTTTAACGTAATTAAAA
CATTTTTATGTTCGATATATTAGCAAATAGCGTATTAATATACAGCTGTTGCGCTCATGG
TAAAATTTAGCGATATACTTTGCATCTTGGCTGCAAAGAAGAATGAATCGGATATACTAT
TTTTGATCATAATGACGGACATCATGATATAATAACGTTATACGGATAACTTTATTTCAA
AAGCACCATCATGTTATCTCTTGTAAAAAGAAGTATTCTTCATTCAATACCAATTACTCG
TCACATTCTTCCAATCCAATTAATATTGGTTAAAATGAACCATGTGCAAATCAGAAACAT
AAAATTATATCACTTTATTTCATATGGTTTCATGCTTACAAAGCTTACTGTCTTTCTCTT
TAACTTATTTTTCTACAGGCTACGAATTCTTTGCAGGCTTACTTTACTCATATTATCATT
ACCTGTACAAATATATATTAAAGAAATCCAAACAAAAATGCTTGAAAAGCATACAGCTTC
CGATACATCATGTATATAGAAAATCACAGTACAAAAATTTTGAATTTATGTATAACCGTT
TCGCCTGATATATGTAAGAGCTCTTGATTGTCGGAATAGTTCGGGAATTCTGGGTGGAAC
TAGTAGCTGGAGATGCGTTCTAAAGGATCTAAAATCAGACTCACCCCAAAAACCAAAATT
TTGATATTCAACTTTAGTATTAGCCAGTCTTAAAATGATTTTTTGCCAAGAAAGCCGAAG
TTTAACGAGCGTTTTAAAATATGCACAAGTCCATTAATTAAATTTGATCACAGTGATTAC
CAATTTTGTTGAAAGCAGTAATTTGTGACGTCCGTTTTTGGCACAAGTAAAAAATATTTG
TTTTGAAGTCTAGTTACAAGAAGCTACTGAAAACACAGGGCTGGATATAGATGTTTATAA
GCTCCTCCCATGGTCTAAGAGTTTCTCCAAACGCCTAATGTATGCAATTTGTTAAATAAA
AATGAAGAATAGATGCATAAACAAGCGTCATTAAAGTTCTTATCATTATTCCATGTAGAA
ATGACCTGCAAGTACGAGCTGGTTATGCGAAACTGAGCTTAACAACATAGTTTTCTTTTC
CATTGGCTTGGATATAAATTTTTCGCTGAGAAACTTCTCTGCATTTTTTAAGCATTAAGC
GTACATAACATAAAGTCACTGAGATATTAGAGGTTATAAAAAAAGACTACGTGGGTGTTT
ACCTAAGATTTTCACAACTTGTTTATTAATTGGATAAATAGTATTTTTCTTGGCATTTAC
AAACTTTATGTTTTTAGGTGTATTTGCAGTTCCATTAAGGGAAATAAGTCATAAGCTTTT
TTGGAAAACAGATTTTTTGCCCCGCTTAACCTGAAATTGATATTAAAAGAATGTGTGAAT
GGCCATTAACTAACAAGAGAATTAATAATGTTAAAACACAGATACCTCGAAACAAACTCT
ATGTAAACACTTATTTTATTGTGGTAATATTTTTTGATAACAACACATCTGAAACAAAAT
AATGCAAAGCCGAATAGTTAGGCTAAAAATGTACTCTTAGACATTTAAAAAGGTTTATGA
ATCCTATGGTATTTAATATATTAAAGAACGAAGTAAATGGGAAAAAATGTGTAAACACTA
TAAGCGTGATGATAGAATTATTAATATAAGATGATGCCGTGCGTTTACCATACGATTGCC
AGCAATACGGTGGAAATAAAAACACTTATGCCATTATTGGTCAACAGACCATTGGCAATA
CCAACGTAGGTTGAGATTTCTAAAGAGGCAGTACTAGATCCTATTATGCTACTTGCTGGT
GTGCTACGAGGCTGTTGCGACATAGTACTTAACCCGGAAGTTATTAGACTCTTGGTGTTG
CCAGTTTCGGATACAGAAACAACACTACTGCTGTGACCAATCACATCGGTCGCGGAAGCC
GTCTGTGTTTCAGCATGATTGAATCTTGAAATTGAAGAGGTGACTACTGTTTTCGTCTCA
GCAGCTCCAGTACTGGTAGTTGTCTCAGCAGCTCCAGTATTGGTTGTTGTCTCACTGGTA
GCACTGTTCATTTTAGAGCTGACAGACTCTTCATTCGTAGTCTGTGGCCTCCATGTTGGA
TAGACCGTAACAACATCATTCACAGTAGCCGTGGCCGTCGAAACAATGGCAGGTGAAGCA
GTTTCGGAACACACACCAGATTCGCAGGAAGTAACAGTAACTAGCGTAGTTTGTTGCCTC
GATTCTGTGGTGGAAATAGGACACCATGTCGTGTATTCTGTGGTAACGCCGTTAATAGTA
GCAGTGCTTATAGATACAATGGCTGGAGAAGCAGTCTTAGAGCATACGTCAGATTCACAA
GAAGAAATTGTAACTACTGTGGTTTGCTCTGTTGTCCCCTTGGTTTGCTTTGTTGTCTCC
GTAGTTTGCTTTGTTATCTCTGTGGTAGAAATAGGGCACCATGTGGTATACTCTGTTGTG
GCACCGCTAACAGTAACGGTGGCCGTGGAAACAATTGCAGAGGAGATGGATTCAGTGCAC
ACATGAGATTCGCAGGATGTCACGGTAACCAAAGTGGTTTGTTCGCTCGTTTTTGTAGTG
GTAGCAGGTGGTAATGAAGAAGCAGTTTCCTGGCTTGTTGTTGTACTGATAACAGGTGGT
AATGATGAAGTAATTTCCTGACTTGCTGTCGCACTGGTAACAGGTGGTAATGAAGAAGTA
ATTTCCTGACTTGTTGTTGTACTGGTAACAGGTGGTAATGATGAAGTAATTTCCTGACTT
GTTGTTGTACTGGTAACAGGTGGTAATGAAGAAGTAATTTCCTGACTTGTTGTTGCACTG
GTAACAGGTGGTAATGATGAAGTAATTTCCTGACTTGTTGTTGTACTGGTAACAGGTGGT
AATGATGAAGCAGTTTCCTGGCTTGTTGTTGCAGTGGTAATAGGTGGTAATGATGAAGAC
GAATATGTAGACTTTGGTGATTCAGAAGAGATAGAAGAGGAAGAAGAGACAGAACTAGCT
GAACTAGTTTCGCTCTCAGAAGAACCAGAGGTGGAACTACTGGTTGGAATGACGGATGAT
TTAAATGATTCAGAGAATATAGAAGTGGAGGTTGTTGTAGAAGAAATGACAGGGGAAGAA
ATGAATGAAGAAGAAATGACTGGAGAAGAAGTGACTAGAGAAGAAGTGACTGAGGAAGAA
ATGACTAGAGAAGAAGTGTCTGAGGAAGAAATTACTGAGGAGGAAATCACAGAAGTTCCA
TTGCTAGGATAGAATGGGGTAATAATTGGATGCTAAGACGTGATAGAGCTGGTTATTTGT
TCTGAAGAAGATGATGACAAACTGGATGAGGTGGCAGTGGTTGGACTTTTAGCAACAATA
ACGGTTTCGTCAGTTGGTTGACCATTAGTGCCAGTGACAGTAGTCATCTCAGTAGAAGTC
GAAGTGGTAGTTGCGATGGTGCTAGTAGTATGTTTTGAAGGATCAGGGATAGTACAATTG
GGCTGTTAGGTCATCGTCAAAAGAGTAAACGTGCCCTGCAAAATCATCGCTAACAGTAGT
AACATCAGGCAATTCCACGCTAACTGGCAGTGTATGCCAAGAAACAGCGTTTGAGTAGAC
AATCTTCATTGGACAGTAGAATCCAGCATACATATACACAGTCCCTGCAATGTTATCGGG
CAATCTTCCTTGCCATGGCTTGATACCATTAATCGTAAAGTTTGTGGATGTAATTGGAGG
TTGCTCTTGTGCACAGCATCCGAATGCAACGTCGCCACCGACTGATAGAATTGCAGAGTC
ATCGACCTTAGCAAACCTGAACGTGTAAGAACTTGTTTGTGGTGGTAAAAAGTAACCTGT
CATTTCTAGAGTAGCGTTTTTTGGGATAGTATAGAAACCAAGTAAATCAGTACTCCAATA
GGTCTTTCCTGGCTATTTTGAACATTCACTATGACCTCTGCATCCCCAGTTTCCATAAGC
ATCTGATTGAGCACATTTAAAAGTTCCTGAAGAGATAACACAAGAAAGATCGTAGTCAAT
TGAGAAATCCGTCTGTCCGCCAACGGAACCTAATTCCAATTCGAGGCATATCCAGAAGTC
ATATATTGCGGGTAGGAATACGTTGTTGAATTCAGTAATGAGTACAAAAGTTGACATTCA
TCCCATTTTTCCTCGGGTCCGTTGGCAAGCATGCTTGTGTACTTCCTGAAACAACATTGG
ACGTGGCCAGGTAGGTGAAGAGTGCCAAAAATAAATAGTGATGAGGCATTTCTTGGTTCG
TCAATCAGGTATGGGTATATTAAACAATAACTTTAAGCCATGCTGTTAATGATGAAAATT
CTGATGCTGGTCTCTTCATATGTCATTGTTTTGGGAACTGTCTTTTTTCGATCAGATGTA
TGCGCAACGATTTGTTTAGCGTAGTGATGTTCCCGCGTAGTACTTAGGAAATTTTGGTAT
CGAAACGTCCCTACAACACTTTTTGTCGCTGATATCTGCACATGTGAGTAACGCAGATTC
CATTGCATTATTACCTTCCCCTTCCCAGAAACGATTTATTACGACTCAACAAGTTCAAGA
AAAAAATTAAAAAGGTTACAACCGCATTTTGCGTTTAGGTGCAGCGAGACTTACCTTGAT
GCAGTCCTAAAGGGTCCTGCAGCGGTTGTAACGAATCCTATTTGCTTTTGTGCATTCCTA
AACGGGCTGAAGTAAAAGTCTTGAGGAACTCCAGGAGAAGATACGATAAGCTCCGAAGTG
CCAAATTTTATTATCAAAAAAAAATATTTGTACGAGCGGAAAAGGATTATACTCTTCCTC
TTTTGCTTCATCACAAGAGGATTATTTTGACGTCGTCTGTTGTACTACTTCTTTATCGGT
GTGCGCAGGAAAAGAAAGAAAAAGGAAGGAAAAATAGATGTCAAAAATCGATGTCAAAAA
ATCTCGTGAGACCTCCGGAATTTTGACGCTGCAAGTCAATCTACGGGAAAGAAGAAATTT
TTTAAACCTAATGCAAAATAAGCTTTTCTTGGAAAATAAGATTTTCGGCAATAAAAGGTA
AATGCAGCCAAAAATCAAAATACTTCAGAAGAAGTCGTAGCGAGGACTGCTAAGGGGAAG
CGGATTTGAAGATCCTTTCCAGAACAAGAAGGAGCCGAAAGCTGTCAGGAACTGTTCCTG
ATTTTTTAGGAAAACAATTAATAGGTATCTCGTCTAGAGTAGTATCTCGAGCTTCCAGAA
GTTGCAGATAATCAAAATCATTGTTTTATCCCTTTTTTTAGATTACAGCTTAGAAGAGTA
GAGAGCAAGTTTACTGAAACGGTTCCTTGTTTACAATAATATTCCTAACAAACTTTACGA
ATTAGGATGCAGCATGATTTTTTATATTGCTTCACTTCCTAAAGTATGAATTTTTATCCG
TAGTCGCAAACAAAACAGCTACTGGAAATCTGCAGCTTGTTAAAAACCGGTAGTTTCCGA
ATACTCCTCGTCCTTGAGTTGTATACCGTTAAACTTCCTAGGGTGTCATGTGTCTGGCCC
AATTGGCCCACAAAATCTGGTCCTATTGACGGTTTTCTTTTGATTTTCAGCATCTTCCTC
TAAGAAGGACAGAAAATTATGTAATATATGGGAGAAACGGCCTCCCAACTGCTAAGTGTC
CCCGGCAGCACGAGTAAGCAAAATTCAGGCAAACTATTGCATTAAGAAGCCGTACATAAT
TCAGCGTGATATGATGAAATTTTGTTAATTGCAAATTTTAGTACGATTTGGTTGTTAGTG
TGTGTTTATGCAAGTAATTATTGAACCCTAAGTAGTTACTGTCTTCTTTTGCTGTAATTC
GTGGATTCACGGCCCTCCAGCAACATGGATTGAAAGGTTCTTTAAAGTTTTCAATCCGTA
AAGTTCTGAAATGTATTTTAATCATGTCAATAATTTTACTGGTGAGTAGCATTTATGACC
AAAAGCGTACTTAAATTAGCAGCAAAAAAATTTTTAATAACGAAACTATAAGGAAAATAC
GAGGTACTGATTATGAGAGTCCCCGTTTCTCATTTTTGAGACATGATCTGAACAAGGCTG
AAAACAGCAATCTTTTTCGATAACTTTTGCAAAAATTTCAAACATTGTTGTTTGAATGCA
GCCAATTTTTATAGGGTACAGAGCTTAATGCTTTACATGTGCTTTATTTTCGGTACTTTC
CTTAAAGTGTCTACATTATCTCTCAGGACTTGAATGTCTTCGGCTGAATTACTATAAAAT
CTTGAGTTTTCTCTGAAGTTTAATCCTAAGACAATAGTGGTGAGTGATGTAGTTCACGTG
TGTGCCACTGGTAATAATAGAGATAACTATCTCAGTTAAGTTTGAAAAGGTAAAAAATAG
TTTAAGTAGTCATTTTTTGCGACGGTCATTCTTCTCTGATGCACGTTCTTTAGACTACCT
ATAAACACCATTCTTACGGAATTATAATGGAAATAAAACATCAGTACGTGTTGCTGTCGG
TGATAGAGGGGTAACAGAACCTTAATTGAAAAATTAGCACAGTGCATAATTTATTAACAT
GATTGTTTTCTGTGGAAAATAAGAAATTCAGCACCAGTAAAAGACGAGAAATATAGGCAC
ATAAATGCGCTCTTACTCGTATGTTCCAGGATGAAAATGTTTAGGGCATCAAGTATTGCC
GAAAGGGCAATATGCTTTAACACCAGAAAATCCACTGTATACTCGTTACGGGTAAACAAA
GCAAAACGCAGTGCGTGATAATGTTTCTAAAATCTCTGCACACTGTTGAAATGCGGCTCT
GATACTTTAGCCCTTAGTACCTGACGGTGCCTAAAATGAGGATAAGTATATGAGTTTACA
ACGAATATAATGCTTTTTACCTCATCATATAAAGAATAATATTAATTTAAAAGTAAAAAT
TAGACCTAGGTGGTAATGAGGAATGTGTCCTAATGAATTTATGTAGTTGATGCTTTTGCA
GCGTTTTTTTTTTTTTGTATTAATCAAAGTGCACTACGTGACAAAAATAAAAAGTGGATG
AAAACAAAAAAATCACAGATTTTCATAAAAATAACATGGTATTCTTAATCGTATATCGTA
ATGGATTGTCAAAAATAAAGAGAATATAGTCGGTTCAAACCACTTTGTACGTCTACAGAG
TATAGTGTAGAAATTATAGTTAGGATTGTGACATCCCTTTTTCTTTAACATAATAAGTTT
GCTTCAAATTAATTGATCAATTAGGATAATAACTCTCAACACCTTTATTATTTATGTTTA
GAGAGTTTATGGTCAGATGGTGATTGGTATTGATACTTATACTTTTTTTCTCATTAGTAT
AATACGCTATATTCCATGTTTGAATAGATCTTATTTTTTGGCTGTCTAGATAATAAACAT
ACCGTTTTTAACACACACACACCAATGAGTAGACGTTATTGCGACTGTATGCCCTTTAAG
ATATTCTGTTCAAAGAGATAAGGTATTTATTCGTTTTCTTGCAATTTCTTCTCATCTATC
ATTATCATACCAGATTGAATCTTATTTTTTAATTTTTAGTCTATTTGATGACGGCTACTG
AATCTTTACATTACTTGAGCTGAGAAGTAAAATTGCATTATTCATATTAAACAAAAAAAT
CAATTTCCCATAAAGACAATAGCTCAACTTCATCACGTCCTTGGTTTTTACCGAGTACAT
ATATTTGATGAATTCTGATTTGAAAATATCAATTTGTTCCTCTAGAATATTTCCACTCGC
ACATTCAAAAGCAGGTATTGGAACGCACAAGAAGCGATCGTCACCTTCCATTGGGGTTAG
TAGCAGGATATATATTTCCATTCTATATTCCAGGTTCTCTTTCACAATTTTATTGAATGA
AATACCTGAGCTACCAAATCAGTCTTAATAACACCATCTTTTACACCGGTACTACAACAA
ACCATACTGAGTCTGAAATTGGACTTCTGCAATGAAAAATTTAAGCCCTGATCTACGCAT
AATGCCCGCTATAAACCTTATTTTTTATATGGGGGTCTGGCGCTTCGGGAAAAGAGAGGA
AAACTTGTAACTCAATATATCTCGATACAACATTACGTTTTGTAAATTTATCACAAAAGC
CAAATGATGATATCTCTCTTGCAAGTTATCGAACATTGATTGGTAATTTGTTTGAAAATT
GTTAATTTATTGAATATTTCTTTTGCAAAAGAAATAGTCTCAGCGAAAGCTGGTTACAAA
ATTTACATCATGAGTTTACGGGATTTGTAAATACGCTTTTTGCATAAAAATACTTTGCCG
TTTCCCACCCTTGCATATTCACTTACTCCCCCCTTCATATACTCTATGTAATGATGATTA
AGCTTTGGCCGCTAAGTCTCTCAATTAGTGTTGATTTTGGTTTTATTCATATGATTCTTC
TTTAGTGAAGTATTGATCAATTACGTGAGTCAGCTTTTTGAAAACCCCATTTGGAAGGAA
TTAGGAAATTATTTTGCTTACTACGACCACTAATTTACCGCCATTTCTGGGCCTTTTTAT
TGACTATTTTGACCATGTGCTCGACTAGAAGAACGGCATCATAATCTGCTGGTAGAGTTA
GTCTATAATGATTGTTGAAAATAAAGGCATAAGAGATATTCCACCTAAAATTCAAGTTAT
TGACTTTATTATCAGGATCTTAGTATCCTTTTTTGGTAAGTCATATTCAATGAACTAGGT
CTCGCAAACTTTTTGTTCGAAAAGCGGTAGTGCATAGTTATGCTAACTCTGGATATATGG
CATAAACCGTACAACACTAGCCCATTTTTTTGGAAGTAGTGAGGGCAGCTAGACTGTATG
ATGAATATTCGCCTGCATACTGAGTTTTTTGGTCCTTTTTTTTATGTGGCTGGCCTTACG
ATATGATGCACAATTCATAATTTGGAAGAAGGGCAGAACAATTGCATCTGTGCTTGGCTC
TCAAGAACGGTGTTTGGTGCATCAAAAGTTTTCGACTGCTTATTTGGTCGGAAATATAAA
AACTCGATCCTCTTATCTAAGCAGTATACATTCTTCTTTTTGAAATGAATGTACTCCGTA
ATATCTTCTTATTTGGCATTTTCATCCTTAACTTTTGCATGGCTCTGAACTAGTCAGATA
GTTGCCCTTTTCAGCAAACCTCTTATTATTGAAAGCATGGTGTACATCCGTTATACTATT
ATATTATAAGAAATTGGGATGCCAATTTTTTTGCTTTTGTTTTGCCTGTTTTCCTTCTTT
TCGCAAAAGTAATTGCAGATTTAATAGCAGGATATTATACCGTTGGTAAAACTTAAGGAT
TTTATGAACAATAGCTTCAAGTACAGCATTCATAGAACCAACTACTAAGGATGAAACTAG
TATGTTTTTGTCAAAATATTTTCTTGACCTTGCTGTAACATCAAGATCTGTTTCTCTAAG
ATATTAAAGTTGAGTAAAAACAAAGCTGATATGAGAAAAATACGTAATTGCTCCACATAA
TACGTGGGTCAGACATAAAGGTAGAATACTTGATACAGAAGAGATTATTCGGTACTCTTG
ATGGCGTGCTTGAACTGGTGCCTCTTAACAACCGGTAATATAGTCAGATGAGTCACTACG
AGTGTGTGTAGTAGCAAGTGTTTTACCTACGTGGCAGTAAGAGTAGCTCTATGGTTGTGT
AATAGTGGTGCTTATTCCTAATGCTCTGAAGTCTGAAGCGGTACAGTTGGTCTGGTCTAT
ATCATGGTCAAAGGAGCAAACATATCTTCTGAAGTGACCGCAAATAGTACTATGATGTGG
TTGGCAATATAACTTAAAAGGAAATAACCACAAGGAATTGCACCCATGTACACAGTTTTT
CCCGGAAATTGGGAAACCAGTACGAACATATATCAATTACTTTTACATTATCTTGATTGG
AAAACTGGCACAATTGACTGTGACGTTAGTAGTATGTTGTTCTTCTCTACATCAGTTAAA
TATACGTGTCAACATCAACTAATCAACTTTCCCCCGTTTACCACATTGAAGCTGGGTGTG
GAAGATTTATTTGAAGAAACTAAAACGTACCCTGTCATTTCCTGAGTCCCCTTTCAACTT
AGTGTGAAAGCCGAACAATTATAATCCTCGGTAGACAACAGATTTATTGTACTAAAGTTA
CTCTTCCTGTTATCTTCCTTGATTTTACTGTTATAGCAATGACCCACCGCAATCAGGAGA
GCCGCCGTATGGAATAGCATACCAAGTCATAAAATCGTCAACCTATTAACGGGGTTCAGG
TTCTTTTTCAGCGTAGTAGCCCTTTAACAAGCGCTGACAAAGTTGACACTCAGAGAAAAT
TCAGGATTTATTGTAATCCAGCTACTCATCCTTAGATCCGCTTGCAGGCATGGTTTTTTT
CACCTTGAGAGGCTATTTTGGGTAAGCCAGGAAGGCTGAAAAATCCCAAAAGGACACAGT
AATAAGAAATTGTTGTTGTTGTATGATGCATTTAGAACTCAAAAGACGAGTTTCTGAAAA
TGCTTACAATACTCCATAGGTAACATGATTTTTTTATTAAAAAAGTATACTGTTCCTTTG
GGTAAAAATTATGCAACCCTTGAGTGTCCGATGAAGATAAGACTACGAAACAATTTGCGG
TAAATTTTTTCTGCTATTGACATTTACACATGCTCCAATCCATTACCCTTTCCATTCTCG
TAATAAAACCTCGAACTGTTATTTCATATTTACATCTAGACGGGTATCGGCCTCAACAAC
TCCAAACAAAAGTAAATAGAAAAGAGCCAGACCTATCGCACCGGGTAGAGCCAGAAAATA
TTTTAAACTATAGTTGACGTATTCTACGGCTGTTGTTTAGGACAATACTTTTTCCTTCAC
AGGCTTCGAATTACGCACATGCAGAACTCCTGTAGAAACCACGAAGAAAAGTTTAATTAA
CTTTCAAATGCCAGAACTAAAGATTGATGAAACAGTTATACGAATTTAAGGGGAACTTGC
TTTTTCCTTTTGCTTCATCATAAGCGCAATATTCGCAGCGGTGGCGTCGCGTCTTACCAT
TTATCGGCACATTTTTCCGAAAAGGAAGGAAAATGGCGGTGTCAAACGGTCTGGTGTGAC
ATCTAGAAGTTCGGCATTGCAAGTTAATCTACGGGAAAAAGAAAATTTTCTTATAACCCT
AATGTATAATAAGGTTTTCGGAGAAAGCAACTCACGGGGAACAATTGGTTAGAAGAGACC
GTAGAAGCGCCCCACTAACCTGGAGTTGATTATCGAGGATCTTTCTCAGAAAAGCAGCTA
ATAAATGAGCACAGTACTCAAAAATTACTCATAGTATTATAATTACTTACTTAGTCAATA
TGGCTGCGCTTTTAAAATGAGTATCTTTTATTTTTTGACAAGGAAGAAAAAGATGCAAGC
AAAGAGAAATTTACTAAGTACAAGCTCATTTCCAAAAATTCAGTTTGCCTGTAACAATGG
GTAGCGATCTTCAACATATGGGATTATGCCTTGAATGAGATTTTTGAACGTAGAGGAAAA
AATCGCAGACAGGCTTTATTGTGCTGTTTGACATAGTATACTCAGCCGTTGTGGTGTTAA
TGAATACTATCGATGTGTATACAAACGTACTTCAAATAAGCAATGCGAATATACTGCAAC
TTTTCGGCCTTTGCAACGATTTGTAATGAATCCTTTTGCATCGCTAGAAGGACAAGATAA
TATTTCTTCTGTTTTTTTTTTACATATGCAACAATTTGAAAGTCAGGTCAAAGACAGATT
CCGGTTCCCCATATTCAGATTGGAGAGAAAAACTTTTGGCAACTCATGTTACCAAGTCGA
GACGCTTAAAGTTAAGTGTCGGCCAAGACACGCAAAATCTTGTAATCTTTTAACGCTGCT
CTTCAAATCACGGACGCAATCAGTACTTGTACCTAATTTTGGTTTTCTAATATTGAATAG
CGAACCATAGGTCGAAAATTTAAGGCCACATAAATCCAGAGCCCGCAACTTGGATAGGTA
TTTACTTGATTTTTAGTTTGCTTTCAATAGTGTCGTGAAATTATAAAGTACGCCGCATAT
ATATCTTGATTAGTTAAAAATAGCAGTGTTCAATGATGATTTGATAGGGTTCATAACTGG
TACCAGCGTAGTACAATTACGATTATCCATGAACATAAAAGTGGTTTAAGTACTATATAT
CAGTGAAGCTTCAAAGTAAGCAAACGAGATACCAAGATCTTGTAGGACCACGATATATAA
GAAGCCTAGTTCCGTTGTAGCATCACATAGAAGAGAGCGACAATGCCTCAGAAATTCTAC
AGCAACAGAAAGCACAGTGAGTCATTAACTGTTGGAATAAGACTCAACTGCGAGCTATCG
ACTAGTACTTATATTACTAGTATATTATATACGGTGTGAAAAGACGACATGAAGATTGAG
GAAATGGTCCCAAGATCTAATGGACACTGAAATGCAAAAGTTGATAATGTAACATGAAAA
TTAAGGACAGCATATTAAACAGAAGAGGAAATAATGGTATTTTTACATAGAGATATGAAT
TTCCCTTTTTCTTTGTTCCTATATCTCTGATAATAAGTTATAATATACTTTGTGCATCTT
ATATCATGCCTTTTCAACAATGAAATATCAGCAGTTATCAAAGCATTCGCCAAATTTTTA
TTAATAAAACAAATGTCAGAAATATGGCCGGAATCTAATCTGAAAGTTAAAATAATTCTT
ACGATATTCTTATCATAAAACCAATGATTAATGTTTATGATGAGCAAAACTGTGCGAGGG
CACATACATACAGTGGGACCTCATGAGATCCAGAAAAAAAGCAAAGGAAAGTTCGATCGA
AACATTAGCTCTTAGATATTACAGACGTGAGGTATCTCTTCCTTGAAGAGAATCTGGCCC
TGATCAAAAACTTTATTTTGATACTGTTCGAAAAGAGAAATAAGGACAACGTTCTAATTT
ATACAAATATAACCAGTAGGCTTTATCGTAAAATCCTCGAACTTGCTTCTCATCACAGAA
GTATAAAAAGTAAAGAGGTCAAGCAAGAAACGAATAACCACCAAATTTTTTTCAATTGAA
AAGCGAAACGTAATGGAAATTCACCTGCTTTGAATCGTTGTTGAATTCTTATCATCAGTC
ATTATTTTCCTCTTTTAAAGCTTAAGTCAACCGCATCTAAGTTTAACACTTCGTTCCCGT
TTTGAAGTTTATCAAAATTCCAAAATACAGTAGTTAGGTGCTCGTGACAAACCTTTTTCC
AAAGTGTCATTAGACTTCATGGAACTACTACACTTCTGGGGAACGAAAAGCTACCATTTG
CTCATCATTGGATAATTTCTTTTTTTTTTTTTGATGCATCCAAACTTGGACCCCTTTTGA
ATGTCGAGTATGAAGTATCAATTTTAGGGCAAGTAGTTTTACAATAATTTTGGTGCACTT
TTACGTCTCTGCTGATATTTTTAATACTAGTGCAAAAGAATTCGAAATAAATATAAAAGA
ACAAGGAGGATTAACATACTTTAAATAACTAATTATCACCATTATTTCAAGTTTCAAGTA
CTGCGTATGGCATGCACAGCAGATTTCTACTCAAAAACATCCTAAGCGAACCACACTAGA
TCTTACGTTAGTACTGCTGAAAATGGCAATAATTGTTAAAGCAAAAATTGGCGATGGTTC
ATTAATTGCTAAACAAAATAGGGCATTTTTCCTCGTTAATGATAAGTACTCATACTTCTG
TTTCTATAAGTGTTAGTTGTAACTTATGAAATATCGATTTAAATTCGAAGTGTTGTTTGC
AGGATATAAATCAAAAAAAAAAAAAAAAAAAAAAAATTAAATAAATAAATAAAATAAATA
CAATGATATCGATAACGGTGAAATTCTTTTCATGGATTTTTGTTGCCCAAGAAAATAACA
ATAACGTTTTCTTTATGATACATATATCTACTTTTTCAAAAAAGGAAGCGCAAGAATTAT
CATTTAGTTCAATTTGAATATTTGAAAGTTTGGAGGAGAAACAGTTAAAAAATAATTCAT
GTCAGCGTATATTTAGCAAAGAAAAGATACACAGATACGTAAAAAGAACGCGAATTTTAT
TAAATAATTGCCAGCAATAAGGACGCAATGAAGACACTTAAACCACTACCGGCCAGTAAG
CTGTTGGCACTGCCAGCATACGTTGAAATTTCTAAAGAAGCTGTACTAGATCCTACCATG
CTACTTGCTGGTGTGCTACGAGGCTGTTGCGACATAGTACTCAACCCGGAACTTGTTAGA
CTCTTGGTGTTGCCAGTTTCGGATACAGAAACAACACTACTGCTGTGACCAATCACATCG
GTCGCGGAAGCCGTCTGTGTTTCAGCATGATTGAATCTTGAAATTGAAGAGGTGACTACT
GTTTTCGTCTCAGCAGCTCCAGTACTGGTAGTTGTCTCAGCAGCTCCAGTATTGGTTGTT
GTCTCACTGGTAGCACTGTTCATTTTAGAGCTGACAGACTGTTCATTCGTAGTCTGTGGC
CTCCATGTAGAATAGACCGTAACAACATCATTCACAGTAGCCGTGGCCGTCGAAACAATG
GCAGGTGAAGTAGTTTCGGAACACACACCAGATCCGCAGGAAGTAACAGTAACTAGCGTA
GTTTGTTGCTTCGATTCTGTGGTGGAAATAGGACACCATGTTGTGTATTCTGTGGTAACG
CCATTAATAGTAGCAGTGCTTGTAGATACAATGGCTGGAGAAGCAGTCTTAGAGCATACG
TCAGATTCACAAGAAGAAATTGTAACTACTGTGGTTTGTTTTGTTGTTTCTGTGGTTTGC
TCTGTTGTCCCCTTGGTTTGCTTTGTTGTCTCCGTAGTTTGCTTTGTTATCTCTGTGGTA
GAAATAGGGCACCATGTGGTATACTCTGTTGTGGCACCGCTAACAGTAACGGTGGCCGTG
GAAACAATCGCAGAGGAGATAGATTCAGTGCACACATGAGATTCGCAGGATGTCACGGTA
ACCAAAGTGGTTTGTTCGCTCGTTTTTGTAGTGGTAACAGGTGGTAATGAAGAAGTAATT
TCCTGACTTGTTGTTGCACTGGTAACAGGTGGTAATGATGAAGACGAATATGTAGACTTT
GGTGATTCAGAAGAGATAGAAGAGGAAGAAGAGGCAGAACTAGCTGAACCCGTTTCGCTC
TCAGAAGAACCAGAGGTGGAACTACTGGTTGGAATGACGGATGATTTAGATGATTCAGAG
AGTATAGAAGCGGAGGTTGTTGTAGAAGAAATGACAGGGGAAGAAATGAATGAAGAAGAA
ATGACTGGAGAAGAAGTGACTAGAGAAGAAGTGACTGAGGAAGAAATGACTAGAGAAGAA
GTGTCTGAGGAAGAAATTACTGAGGAGGAAATCACAGAAGTTCCATTGCTAGGATAGAAT
GGGGTAATAATTGGACGCGCAGACGTGATAAAGCTGGTGATTTGTCCTGAAGAAGATGAC
AAACTGGATGAGATGGCAGTAGTTGGAGTTTTGACAATAATGACAGTTTCATCAGTTGGT
TGACCGTTGGTTCCAGTGATGGTGGTCATCTCAGTAGATGTAGAGGTGAAAGTACCGGTC
CATGGCTCGGTTGTAGTTGTAACCAAACCTTCACTGGTTGGAGTTCTGATAACAATCACG
GTTTCGTCAGTTGGTTGACCGTTAGTACCGGTGACGGTGGTCATCTCAGTGGATGTAGAG
GTGAAAGTACCAGTCCATGGTTCAGTGGTGGTGCTGATTAGACCTTCACTAGTTGGAGTT
CTGATGACAATGACGGTTTCGTCAGTTGGAACGCCGTTGGTACCGGTGACGGTGGTCATT
TCAGTGGATGTAGAGGTAAAAGTGTCGTTCCATGGCTGAGTTGTAGTCATGGCAGTAGTG
GCTGTTGTTGGTGTTCTGATGACAATGATGGTCTCATCAGTTGGCAAACCGTTGGTACCG
GTGACGGTGGTGATTTCAGTGGATGTAGAGGTAAAAGTGTCGTTCCATGGCTGAGTTGTA
GTCATGGCAGTAGTGGCTGTTGTTGGTGTTCTGATGACAATGATGGTTTCATCAGTTGGC
AAACCGTTGGTACCGGTGACGGTGGTCATTTCAGTGGATGTAGAGGTAAAAGTGTCGTTC
CATGGCTGAGTTGTAGTTATGGCAGTAGTGGCTGTTGTTGGTGTTCTGATGACAATGATG
GTTTCATCAGTTGGCAAACCGTTGGTACCGGTGACGGTGGTCATTTCAGTGGATGTAGAG
GTAAAAGTGCTGTTCCATGGCTCAGTTGTAGTTATGGCAGTAGTGGCTGTTGTTGGTGTT
CTGATGACAATGATGGTTTCATCAGTTGGCAAACCGTTGGTACCGGTGACGGTGGTCATT
TCAGTGGATGTAGAGGTAAAAGTGTCGTTCCATGGCTGAGTTGTAGTCATGGCAGTAGTG
GCTGTTGTTGGTGTTCTGATGACAATGATGGTCTCATCAGTTGGCAAACCATTGGTACCG
GTGACGGTGGTGATTTCAGTGGATGTAGAGGTAAAAGTGTCGTTCCATGGCTGAGTTGTA
GTCATGGCAGTAGTGGCTGTTGTTGGTGTTCTGATGACAATGATGGTCTCATCAGTTGGC
AAACCATTGGTACCGGTGACTGTGGTCAATTCGGTAGAAGTAGAGGTAAAAGTGTCGTTC
CATGGCTGAGTTGTAGTCATGGCAGTAGTGGCTGTTGTTGGTGTTCTGATGACAATGATG
GTCTCATCAGTTGGCAAACCATTGGTACCGGTGACTGTGGTCAATTCGGTAGAAGTAGAG
GTAAAAGTGTCGTTCCATGGCTGAGTTGTAGTCATGGCAGTAGTGGCTGTTGTTGGTGTT
CTGATGACAATGATGGTCTCATCAGTTGGCAAACCATTGGTACCGGTGACTGTGGTCAAT
TCGGTAGAAGTAGAGGTAAAAGTGCTGTTCCATGGCTCAGTTGTAGTTATGGCAGTAGTG
GCTGTTGTTGGTGTTCTGATTACAATGATGGTTTCGTCAGTTCGTACACCATTGGTGCCA
GTGACTGTGGTCAATTCGGTAGAAGTAGAGGTAAAAGTGCTGTTCCATGGCTCAGTTGTA
GTTATGATGGTGCTAGCAGTTGTTGGAGTTCTGATGACAATGACGGTTTCGTCAGTTGGA
ACGCCGTTGGTACCGGTGACGGTGGTCATTTCAGTAGATGTAGAAGTGAAAGTACCGGTC
CATGGTTCCGTTGTAGTTATGGTAGTACTGACAGTATAATTTGAAGGGTCTGGAATGGTA
CAGTTTGGCTGGCTTAGATTGTTGTCAAAAGTATATACGTACCCTTCAAAGTCATCACTA
ACGGTAGTGCCATCTGGTAGTGTCACACTAATTGGAAGTGTACCCCAGGCAACGGCATTT
GAGTAAACAATCTTCATTGGATAATAGAAACCAGCATACATGTAGACAGTCCCTGTAATA
TTATCAGGGGGACTTCCATTCCATGGCTTGATACCATTGATGGTGAAGTTAGTCGACGTG
ATGGGAGGTTGTTCTTGTGCACAACATTCGAACGCAATGCTACCACCGACTGATAGAATT
GCAGAGTCGTCAACTGTAGCAAACTTGAATGTGTAAGAACCCGTCTGTGGTGGTAAAAAA
TAACCTGTCATTTCTAGGGTTACGTTTGTTGGGGTAGTATAGAAACCAAATAAATCAGTA
CTCCAGTATGCAATTATTGGATTATTAGAACAAGCACCAATTCCTTTGCATCCCCAATTA
CCATATAAATCTTCTTGAGGACAAGGAAATGTGCCTGATGAACTAACACAAGGAATATTA
TAATCAATCGAGATATCAGTTTGTCCTCCGACAGAACCCAGTTTAGTTTTTGAGGCATAT
CCATAAGCCATATATGCTGCATTCGAATATGTGGAGGAATCTCTCAATGAATACTGGTAA
AAGTTTACATTCATACCATTCTTCCTTGAGTTTGCTGGCAGGCATGCCGCTGTAGTCGCA
GAGACAACATTAGTTAATCCCAGCAATGTGACGATGGCTAGTAGTAAACAATAATGTGCC
AGAGACATTTTTGGGGCTTTTATTGTACAATTGTTCTTTTTAAATTGCAATTTAAAGAGC
GTACCTGTAAATAAGAAGGAAGAACGTTATGTTATTAATGGACTTTTAGTGTCATCGAAT
TTTATGTAATATATAAGAAGGTAGAATAATTTGGCAGGATAATGTGTTAGCAAAGGAGGA
AATCGAATACCTTTAAAAGAGAAAAAATTTTTTAGCTGCTTAAATTTCTGTGTTATACCA
CCCGATAGATTTTGAGTTATGCTTTCTAATTGATCTGACTGCGAACGTTTTCTTTATGCC
ATCTGAATTGTCAGGAACAAAGAAGAAAAAGAAAAGTTTTTAAAAAATCTGTGGTCGTGT
GTGATGTACCTTTCCTTTACATGCATTAATGCGCTCTGAAATGTGGTACGATATCCTTAC
AGAGAATATATTTTCTGTATATCGTGCAATGTTGAATAACCTATGAAGGAAAGTACCCAT
CGCTCAAGGTAAGCATTCCAGGAGGGTCGCCAGAAACTTAAACTAGTTTTAGCGACAGAT
CCGAAAATTGATAGAGACATTGAAAAAATCACTACTCCGTCCTTTTTAGTGCTTTCTCAA
TGCATAATTTTGGTGCACGACTAAAAAATTCTAGAACACTATAGTTGCATTTTTTGGGCC
GGAAGAAGAAAAACGCATGTAACTTTAATGTCAAATAAAGTTTTCACCTAGTAAGCGCGA
TACAAAAAAAACACAGAAATAGCCATAGGAAAGTGAATTTTGTCAGCCGACTAAAATTAA
GGTTAGCTTACAAAGCAGCAAAAAATTTGACATCGCACGGTATTCCCTGAAAAAGGAGCA
GGCAGGTGCTGTATATTTTTTTCGGTTCCTGCCTCTTACATGGCGTCGGTGTATCTTAAA
TACTAAAGTGAGCTGACTACCCTTTTGAGTGCCCTATGTGACCTCTGATCTCGAAAGTAA
ACAAGAGATACCTAATTTCACAGCCACTTTTTGTTGCGGACACTGACGGGATGTGTTGTG
AATATTTTAAACCTTAAAAGTATTTATTGGTTAGTTATACTTAATTCTTATACGTCCTTT
AAAACCAGTGTGCAGTAAGTCTGTCACACAAAAATATGATTGATGCATTTTCAAAAAATA
ATGGCTTTGAGGTAATTCGTTCCACTTTTGAGACTTATTCACATGTCCCAGCTGGGTGCA
ATCAAAATATACCGGCATTTCAGCAAGGTAACTATATACGCTTTTTTTCTCATGGTTTTT
GAAATCATACCTGCCAAGCTTGCTGCACTTGGAAGGCAACTCCGTTTTTCAGAGATTAGA
TCCTTTTTTTTTTGAAGAAAAGGCAGCCAAGTTACGTCATAGAGAAAACTCCCTAGAGCG
CTGCAAACACTTGTTAGTTTGCAGCTTACTTCACGTGTGGCTGGAAAATTGAAAAGTTAC
AATACGGTAAAAATACTTTGAAGACACTACACTATAACTGCTTGACCAAATTTTTACTCG
TGAAAAATTTGTTCCAGCCGGTCTGTTACTGATATTAAGTTAAGGAATAGTAAACCGTAT
ATTTTTCATCCACGTTTTTGTAGTTTATTTTCGGTTTACTAGCTATGCATTGATTGTCTA
TCAGAGCATATCAAGGTGGTTATGGAGGTGCTGATATTTAATCAATAAAATTATAGAAAT
TTTGAGAAAACAATAATGATTGTTTCTACAATGAAAATCAGTTCATGGAATAGTTGCCTT
CGCACTACTTTTTCACCAGATTAATGGTGCATCAGAGCTTTCCCTTTTTGTCTTTTTCTT
GTTTCCTTTTTCGATTGGTTTATCACGTAAGTTTCTTATGACATAAGAAGAGGCAAGAAA
CGAAAAGGGAAATATTGCCTACTTTTTTCTTTTCGAACGTAAATAATGACGGGATTTTGG
TGTCATTTTTTTTCGTCTGGATTTTCTCAGAGAAGTACGTTTCGTCGCACAAGCTAAAAT
CATTGACAGGGCATGAGTTACGTCAATCTCTGGTCAATCCATGTCCAAAAAAATTTCTTG
ATTTGTTCAAAGTTTTTGCATAGGCACATTAATTGGTTTAGCGAAGTATACATTCTGAAG
AACATTTTTGGGTGTATTTTCCACATAGAAAATTCGATTTTTTTTTTTCAATGCACCACT
TGTCGAGTATACGTTAACTTTAATGTATTGAAGATGCAAAAATGAAAAGCCTACTTGGCA
TATGGAATTACAATAAATGGTCAATTCCTGTTTAAGCTAGCAGCGGCACTGTCGGTGTAA
ATTTGGGTTTAAACTATTGTTTACTTACTTTGAGAAATTTATGTATCGCCTATATTTTTC
AATAAGTGCGATATCTTTAGCTTTCCACAGAACCCCCCCTCAGGCTATGGACGTGCGGTT
ATATGATCTTCTAATAAAAATCTCTTAGACTACGGTTCATGGAATACTTCTTGACTTCTT
GGCGAAGGAAAGGCGCATAAATGTTGTGATCGAATGACCAGTAATACGTCGTTTGTTCTC
TTGCTGAACAGCGAGGAAGAGATATTCATCCAAATGCATGAACGCAGAATCCTGTAAAAG
TCGTAAAAATGTTAATCGCAATGTTGTAAAAACCGTCAAGGCATTTATCGTTCAAAATGG
CGATCATTGTTACTACTAAACACTTACTGTTAAATTAAAAAGCTGATGTTGCGTAATCCA
TTGACCAATTCATAGGCAATGTATTTCAATGACGCACAAGATTCATAACAAATTTTTTAT
TTACGATGTACCTGTACATTGTGCAGAAGGTCTTCAGAGTGAGTTTAAGCTAGGCTGTAA
ATATTTTAATGTTAAGATGAAATTTAAGTGAGCTGGTAATATCAAGTGAGGCATAATTTG
TTATATGTAGCTGAACTTCAACTTTAAATAGAAAAATTACAACTAACAAGCACCGGATTG
TTTCAGAATTCAAAGTGTAGAAGCTATTATTCTTGCAAAATAAAACGCTTTCAAAGTTTT
CTTCTATAAACATACTTGTGGCAGCTTGTTTTTTTTGTTTTATTTTTAAGTTTTGTTGGG
TCTCTGAGAACTTTCAAAAAAAGAAAAAGTAAAGTATGATAAAACGGAGCACTTGCCAAA
GTAATTAACGCCCATTAAAAAGAAGGCATAGGAGGCATATACATATATATATATATATAT
ATATATGGCTGCTGACAGATATTCTGCACTTAAAAACTAAAAATATTATACCAACTTTTC
TTTTTCTTCCCGTTCAGTTTGCTTGATTGGCCCAGCTCTTTGAAGAAAGGAAAAAATGCG
GAGAGGGAGCCAATGAGATTTTAAAGGGTATATTACTTATCTTATCGATAAGCAGTATTG
ATATTAAAGGGACAGTTTTATCGTTGGTTAATATGGAAAAAGTGATGACCATGATGCCTT
TCTTAAAAAGAGTATTTCTTTTTATTTCACTTTCACATAAACAGTTAATGACTTCTGACT
TTGAGCCGTTCGAACTCAGTTATATAAAGGTACATACATAGGCCACACACACACACACAC
ACACATATATATATATATATAGGGAAGTAGCAACAGTCACCGAAAAGAAAAGGTAAAAAG
TAAAAAATGACAAGCGAACCAGAGTTTCAGCAGGCTTACGATGAGATCGTTTCTTCTGTG
GAGGATTCCAAAATTTTTGAAAAATTCCCACAGTATAAAAAAGTGTTACCTATTGTTTCT
GTCCCGGAGAGGATCATTCAATTCAGGGTCACGTGGGAAAATGATAATGGCGAGCAAGAA
GTGGCTCAAGGATACAGGGTGCAGTTCAATTCAGCCAAGGGCCCTTACAAGGGTGGCCTA
CGCTTCCACCCATCAGTGAACCTGTCTATCCTAAAATTTTTGGGTTTTGAACAGATCTTC
AAGAATGCGCTCACTGGGCTAGATATGGGCGGTGGTAAGGGTGGCCTGTGTGTGGACTTG
AAAGGCAAGTCTGACAACGAGATCAGAAGGATTTGTTATGCGTTCATGAGAGAACTGAGC
AGGCATATTGGTAAGGACACAGACGTGCCCGCAGGAGATATTGGTGTCGGTGGCCGTGAA
ATTGGCTACCTATTCGGCGCTTACAGATCATACAAGAACTCCTGGGAAGGTGTGTTGACT
GGTAAGGGTTTAAACTGGGGTGGCTCACTTATCAGGCCGGAGGCCACCGGGTTCGGCTTA
GTTTACTATACGCAAGCAATGATCGATTATGCAACAAACGGCAAGGAGTCGTTTGAGGGC
AAACGTGTGACAATCTCCGGAAGTGGCAATGTTGCGCAATATGCAGCTTTGAAAGTGATC
GAGCTGGGTGGTATTGTGGTGTCTTTATCCGATTCGAAGGGGTGCATCATCTCTGAGACG
GGCATTACTTCTGAGCAAATTCACGATATCGCTTCCGCCAAGATCCGTTTCAAGTCGTTA
GAGGAAATCGTTGATGAATACTCTACTTTCAGCGAAAGTAAGATGAAGTACGTTGCAGGA
GCACGCCCATGGACGCATGTGAGCAACGTCGACATTGCCTTGCCCTGTGCCACCCAAAAC
GAGGTCAGTGGTGACGAAGCCAAGGCCCTAGTGGCATCTGGCGTTAAGTTCGTTGCCGAA
GGTGCTAACATGGGTTCTACACCCGAGGCTATTTCTGTTTTCGAAACAGCGCGTAGCACT
GCAACCAATGCAAAGGATGCAGTTTGGTTTGGGCCACCAAAGGCAGCTAACCTGGGCGGC
GTGGCAGTATCCGGTCTGGAAATGGCTCAGAATTCTCAAAAAGTAACTTGGACTGCCGAG
CGGGTCGATCAAGAACTAAAGAAGATAATGATCAACTGCTTCAACGACTGCATACAGGCC
GCACAAGAGTACTCTACGGAAAAAAATACAAACACCTTGCCATCATTGGTCAAGGGGGCC
AACATTGCCAGCTTCGTCATGGTGGCTGACGCAATGCTTGACCAGGGAGACGTTTTTTAG
CCGTAAGCGCTATTTTCTTTTTGTTCGTAACTATCTGTGTATGTAGTAGTGTAATCTACT
TTTAATTTACTATGCAAATAGGGTTCAGCATTACGGAAGAAACTGAAATCCCTTCCGCGG
AAGTTTCTTAGTAGTGGCCGTGCGGGGTGAGGAGATTACATGTCGGTAATTAGATGATTA
ACCTAGGCAATTTGAAGGGGGATAGTGGCATTGGTTAGCTCAGATATGATAAGGAGAACT
AAGCAAGGGGGTTAACCACCACGGCTGTAGCACAAGACCGGCAGATGCGATTATTAGCAA
CACATTAGTTAATGCTTTTGATAAAATGTATATAAAGGCTGTCGTAATGTGCAGTAGTAA
GGACCTGACTGTGTTTGTGGTTCTCTTCATTCTTGAACCTTGTCATTGGTAAAAGACCAT
CGTCAAGATATTTGAAAGTTAATAGACAGTTAACAATAATAACAACAGCAATAAGAATAA
CAATAAATTCATTGAACATATTTCAGAATGAGAGCCTTAGCGTATTTCGGTAAAGGTAAC
ATCAGATTCACCAACCATTTAAAGGAGCCACATATTGTGGCGCCCGATGAGCTTGTGATT
GATATCGAATGGTGTGGTATTTGCGGTACGGACCTGCATGAGTACACAGATGGTCCTATC
TTTTTCCCAGAAGATGGACACACACATGAGATTAGTCATAACCCATTGCCACAGGCGATG
GGCCACGAAATGGCTGGTACCGTTTTGGAGGTGGGCCCTGGTGTGAAAAACTTGAAAGTG
GGAGACAAGGTAGTTGTCGAGCCCACAGGTACATGCAGAGACCGGTATCGTTGGCCCCTG
TCGCCAAACGTTGACAAGGAATGGTGCGCTGCTTGCAAAAAGGGCTACTATAACATTTGT
TCATATTTGGGGCTTTGTGGTGCGGGTGTGCAGAGCGGTGGATTTGCAGAACGTGTTGTG
ATGAACGAATCTCACTGCTACAAAGTACCGGACTTCGTGCCCTTAGACGTTGCAGCTTTG
ATTCAACCGTTGGCTGTGTGCTGGCATGCAATTAGAGTCTGCGAGTTCAAAGCAGGCTCT
ACGGCTTTGATCATTGGTGCTGGCCCCATCGGACTGGGCACGATACTGGCGTTGAACGCT
GCAGGTTGCAAGGACATCGTCGTTTCAGAGCCTGCCAAGGTAAGAAGAGAACTGGCTGAA
AAAATGGGTGCCAGGGTTTACGACCCAACTGCGCACGCTGCCAAGGAGAGCATTGATTAT
CTGAGGTCGATTGCTGATGGTGGAGACGGCTTCGATTACACATTTGATTGCTCCGGGTTG
GAAGTCACATTGAATGCTGCTATTCAGTGTCTCACTTTCAGAGGCACCGCAGTGAACTTG
GCCATGTGGGGCCATCACAAGATACAGTTTTCTCCGATGGACATCACATTGCATGAAAGA
AAGTACACAGGGTCCATGTGCTACACACACCACGATTTTGAGGCAGTAATAGAAGCTTTG
GAAGAAGGCAGGATTGACATTGATAGAGCAAGACATATGATAACGGGCAGAGTCAACATT
GAGGACGGCCTTGATGGCGCCATCATGAAGCTGATAAACGAGAAGGAGTCTACAATCAAG
ATTATTCTGACTCCAAACAATCACGGAGAGTTGAACAGGGAAGCCGATAATGAGAAGAAA
GAAATTTCCGAGCTGAGCAGTCGGAAAGATCAAGAAAGACTACGAGAATCAATAAACGAG
GCTAAACTGCGTCACACATGATTGTGATTGAGTACTCACGTTCTCGTGTTAATCCCGCGG
TCTTCTTGTTTTACTAACTTTTCTTTCTCTCATAGCATTCTCTTGACAGTGTTTTATATA
CATCATATGTACATTTATCGAGCCAATCGAGGGCAGCAGTTTAACATCAAGCCGGATTTG
CTCACGCTACTTTGACCCCTTTTCGTTTCGACGGAGAGAAGAAACCGGTGTTTTCCTATC
CTTGCCTATTCTTTCCTCCTTACGGGGTCCTAGCCTGTTTCTCTTGATATGATAATAGGT
GGAAACGTAGAAAAAAAAATCGACATATAAAAGTGGGGCAGATACTTCGTGTGACAATGG
CCAATTCAAGCCCTTTGGGCAGATGTTGCCCTTCTTCTTTCTTAAAAAGTCTTAGTACGA
TTGACCAAGTCAGAAAAAAAAAAAAAAAGGAACTAAAAAAAGTTTTAATTAATTATGAGA
GCTTTGGCATATTTCAAGAAGGGTGATATTCACTTCACTAATGATATCCCTAGGCCAGAA
ATCCAAACCGACGATGAGGTTATTATCGACGTCTCTTGGTGTGGGATTTGTGGCTCGGAT
CTTCACGAGTACTTGGATGGTCCAATCTTCATGCCTAAAGATGGAGAGTGCCATAAATTA
TCCAACGCTGCTTTACCTCTGGCAATGGGCCATGAGATGTCAGGAATTGTTTCCAAGGTT
GGTCCTAAAGTGACAAAGGTGAAGGTTGGCGACCACGTGGTCGTTGATGCTGCCAGCAGT
TGTGCGGACCTGCATTGCTGGCCACACTCCAAATTTTACAATTCCAAACCATGTGATGCT
TGTCAGAGGGGCAGTGAAAATCTATGTACCCACGCCGGTTTTGTAGGACTAGGTGTGATC
AGTGGTGGCTTTGCTGAACAAGTCGTAGTCTCTCAACATCACATTATCCCGGTTCCAAAG
GAAATTCCTCTAGATGTGGCTGCTTTAGTTGAGCCTCTTTCTGTCACCTGGCATGCTGTT
AAGATTTCTGGTTTCAAAAAAGGCAGTTCAGCCTTGGTTCTTGGTGCAGGTCCCATTGGG
TTGTGTACCATTTTGGTACTTAAGGGAATGGGGGCTAGTAAAATTGTAGTGTCTGAAATT
GCAGAGAGAAGAATAGAAATGGCCAAGAAACTGGGCGTTGAGGTGTTCAATCCCTCCAAG
CACGGTCATAAATCTATAGAGATACTACGTGGTTTGACCAAGAGCCATGATGGGTTTGAT
TACAGTTATGATTGTTCTGGTATTCAAGTTACTTTCGAAACCTCTTTGAAGGCATTAACA
TTCAAGGGGACAGCCACCAACATTGCAGTTTGGGGTCCAAAACCTGTCCCATTCCAACCA
ATGGATGTGACTCTCCAAGAGAAAGTTATGACTGGTTCGATCGGCTATGTTGTCGAAGAC
TTCGAAGAAGTTGTTCGTGCCATCCACAACGGAGACATCGCCATGGAAGATTGTAAGCAA
CTAATCACTGGTAAGCAAAGGATTGAGGACGGTTGGGAAAAGGGATTCCAAGAGTTGATG
GATCACAAGGAATCCAACGTTAAGATTCTATTGACGCCTAACAATCACGGTGAAATGAAG
TAATGACAAAATAATATTTGGGGCCCCTCGCGGCTCATTTGTAGTATCTAAGATTATGTA
TTTTCTTTTATAATATTTGTTGTTATGAAACAGACAGAAGTAAGTTTCTGCGACTATATT
ATTTTTTTTTTTCTTCTTTTTTTTTCCTTTATTCAACTTGGCGATGAGCTGAAAATTTTT
TTGGTTAAGGACCCTTTAGAAGTATTGAATGTGGGAACAAAGACGACAAAAGGTAGTTTT
TTCCTTGACTATACTGGTAAGATATCGTCTAAAACAAAGCATGGCCAAGAAAATATCAAA
GAATTCAAGAGCTGCTAGACAATCGGATGCTCTTGAACCAGAGGTAAAGGATTTAAGTGA
ACTACCTAGAGCTGAAAAAACCGATTTGACTAATATTTTGATTAGAACAGCAGCCAAGAA
TGAGGCATTGCTGGAAGCAAAGATATCTAAGAAAGCCAATAAAAGTAAGAGGGGCAAGAA
GTTAAATAAAAAGGCTCTGGAAGACAAACTGGCCAACTCTATTTCATCCATGGACAGGGA
TCGTTTAGTGAAGGCCTTGAATTTTACCAATCGTCTGGACGGTAAAATTGCCAAGTCCAT
TTCTCGTGCCAAGTACATTCAAAATACAAGAAAGGCTGGCTGGGATAGCACCAATGAGAC
TATAAAAAAAGAGCTGGCTTTTTTGAACGGAGGGTTGTCTGTGCAGGCAAAAAGTGCTAG
TGAAGGTAATGCTGAAAAGGAAGATGAGGAGATCCCAGAAGTTTTTGACTCTTTAGCAGA
GGATAACACAGTGCAGAAGACTCCTACAAATAGATTCGGTGTCCTGCCAGACGATGTTGA
AGAATAGAAAATTTTCATATGAAAGGTCCTAGGAATACACGATTCTTGTACGCATTCTTC
TTTTTTCTATCTTCTTTCATTCTTTGTACATTAGATAACATGGTTTTAGCTTAGTTTTAT
TTTATTTTTTATATATCTGGATGTATACTATTATTGAAAAACTTCATTAATAGTTACAAC
TTTTTCAATATCAAGTTGATTAAGAAAAAGAAAATTATTATGGGTTAGCTGAAAACCGTG
TGATGCATGTCGTTTAAGGATTGTGTAAAAAAGTGAACGGCAACGCATTTCTAATATAGA
TAACGGCCACACAAAGTAGTACTATGAAATTTTCTGCGTATTTATGGTGGCTGTTTTTGA
ATCTAGCGTTGGTGAAAGGCACTTCATTGCTATCCAACGTTACATTAGCGGAAGATTCTT
TCTGGGAGCATTTTCAGGCTTACACTAATACAAAGCATTTAAACCAAGAGTGGATCACAA
GTGAAGCCGTCAACAATGAAGGCTCTAAAATATATGGTGCACAATGGCGACTATCACAGG
GTCGATTGCAAGGATCCGCATGGGATAAAGGAATCGCAGTTCGAACAGGCAATGCCGCAG
CTATGATAGGACATCTCTTGGAGACACCTATTAATGTTTCAGAAACGGATACCTTGGTTG
TCCAGTACGAAATTAAGTTGGACAATTCTTTGACGTGCGGCGGTGCGTTTATTAAGTTAA
TGTCTGGTTTCATGAATGTTGAAGCATTAAAACACTATGCACCCGATACAGAGGGTGTCG
AGTTAGTTTTTGGTCCGGATTATTGTGCTCCTGAAATAAATGGCGTGCAATTTGCCATCA
ATAAGGTTGACAAGATCACACATGAATCTAAACTAAGATATTTGCAAGAGATGCCCCTGT
CAAAATTAACTGATACCTCGCAATCTCATCTGTATACGCTCATAATAGATGAATCAGCGC
AGTCTTTTCAAATTCTTATAGACGGTAAGACGGTTATGGTAAGAGAACATATCGAAGACA
AGAAAAAGGTCAATTTTGAGCCACCCATTACACCGCCTTTAATGATTCCTGATGTTTCAG
TAGCGAAACCGCATGATTGGGATGATCGCATCCGAATCCCAGATCCTGAGGCGGTGAAGC
TCAGTGATCGGGATGAACGAGACCCATTGATGATTCCACATCCAGATGGCACTGAACCAC
CAGAATGGAACAGCTCCATCCCCGAATACATTCTTGACCCAAATGCTCAAAAGCCCTCGT
GGTGGAAGGAACTTGAGCACGGGGAATGGATACCGCCCATGATTAAAAATCCTCTTTGCA
CTGCAGAACGTGGTTGTGGCCAGCAGATACCAGGGCTGATAAATAATGCCAAGTACAAAG
GTCCAGGCGAACTCAATGAAATCATAAATCCCAATTACATGGGGGAATGGCATCCACCGG
AAATTGAAAACCCGCTATACTACGAAGAGCAGCACCCATTGCGCATCGAAAACGTTATCA
GTGGTGTGATCCTCGAGTTTTGGAGTGGATCTCCAAACATGTTGATAAGCAACATTTATG
TTGGTAAAAATGTAACAGAGGCGCAAATTATTGGGAATAAGACTTGGCTGATGAGAGACC
GCGCGTTTAGAGGCTCCGATGGCCCCACAGAACGCAAATTCATGAATAGCAGACTAGGAA
ATCTACAAACAACTTTCCATAACGAAAGAGAATCCCCTAATCCATTTGACCGCATTATAG
ATCGCATATTAGAGCAACCTCTGAAATTTGTGCTTACTGCGGCCGTCGTGCTCTTGACGA
CGTCGGTTCTTTGTTGTGTAGTATTTACATAGTGGACAAGTGTTAGTTTATAACATGGTC
TCAATAATTGCACCACAACGGCTTCTCTTTTATAGATGGTTAACATTATAGTATCAATAT
TATCATCATGATTAAATGATGATGTATAATACTTACCCGATGTTAAATCTTATTTTTTCA
TGCAGTAAGTAATCATGCAACAAGAAAAACCCGTAATTAAGCGAACATAGAACAACTAGC
ATCCCCGATAAGACGGAATAGAATAGTAAAGATTGTGATTCATTGGCAGGTCCATTGTCG
CATTACTAAATCATAGGCATGGAAATTTCCAGTTCACCATGGAACGACGGTGGATACAGC
CCCTATGAGAGAAACAGAGTCGCTGTATCACCATTTTCATCAGCGTTGGAAGGCGAAGAA
CGAATAGAAACCTCTCGATCTTTGGGTGATCATTGCTTTGAACCTTTGCCATACGTGACG
AATTATCTTTCTATTTTCGCGCTTTTTGGTAAAGAGATATTTGGTGACAAGGGAAATGTG
AGCTCAAGAAATGAATATTTGCTAAAAAAATACTACTCTTTGAAAAAGCCATTTGTATTG
CGACATAATGGGCATGCGTTGAAGAATCCCGACATGCCACTCCAGAGGAATGACATATTG
CAAACCAATTTCATGGTTGACAAATTTCTGAATCGTACTGTGCGGTCAGTGAATTTTAAT
AATTTCAAGATAATATCAGATATGCAAAGTAAAAGCGGTCGAGGAACAAAGTCAGGCACA
AATCAGAATCAAAGTGCCGACGCTATTCAAAATATTTGTCTACCATCTATACCGTCGGCG
TTGCCTTATTTCCAGTATTATAGGAAGCTATTGACAGTTAATACCAAAGAATGGGATATT
TTAAAACTGCACAGTTTATGGGTACCAAAGCTAAGGAAGGATTTTAAAGATTTTTCGTTG
TATGGTGATAAAAACTCTTTAAAGCCGATCGATAGTCACTATGATGAGGATAATACCATG
AAGAAAAATTTATTTTTTGAAAGATCTCCAAGTCGACAGACTCTAGATGGTAAAGGGTGT
GCCTCTAAGGGGTATGACATTTCTTCCGGTAATATGATTATCCCATCCCTATTTTCTGAA
GATAAGCTGCCGGCTTTAACTTATCATTGTTCCGTAGAATTAAATGGAAACATTTACATA
TTTGGGGGATTGATGCCATGCTACAGCTATGAGGAGGATGCGCCGATGCTGAACGATTTT
TTTGTAGACGGAATAAAGAACTTACCTCCGCCTTTACTACCTCAAGTGATTAATAATCCA
TCAATGGTCAATAATCCTCATCTTTATGTCGCTTCTATACCATCATGCCGGTTTAGCAAA
CCTAAAATGGGGGGTTATATACCGCCTCCATTGCTATGTGTTCAAGGATCCAAATTAACG
GACCGACATATTTTCTTTTATGGCGGATTTGAAATCAGGACAGAAACCCGTGGTGATGAA
AATGGGAAGTATCATCTCAAGAAAAGATTATATGTGAATAACACTGGTTACATACTCGAT
ATTATGTCGTTCAAGTTCACTAAAATAGATATCATAGTACAACCTTCCAAATATAATGCA
TATCCGACAATGTCATCGAGGTTTGGTCACTTACAAATTTCTATTGATAATCCAAATAGG
AGAGCTAGCGTTCATTCTTCAAGCATGAACGAAATTCATAAAATGGGGAGTGCTTCCATG
AAACAAGGTAGCAGCATCACTTCCGGGCGGCTTGAAAAAGCAGCAGTACTTTCATCATTA
CCTCATAATACTGTGCACACGGTTATAATATTTGGTGGTTACAGACAAACCGGTGATGAT
CGTTACGAAGCAATGAATGATTTGTGGAAGATAGAGATACCCGTGATACGTCGCGGTAAA
AAAGGTTATTGTAAGTTTTCAGAGACAGCTAACGCGATACTACTGACGCCAAGCGAAAAG
GACAAATCGGATTGGCCCGAAGAAAGAGCCTTTTCTGCCTTTTCTGTTCATGGGACTTCG
TTAATGGATAGGAGTTCTCTTGACATGAGACTATTGAACAACTTAAAAAACCATTTTGTT
TTAAAACCGTCATATATATCACAGGATCGCGTTGTTAGTCCTAAACCGGTTTTCCCCATG
ATGGTTCATGGCACGCATCAAGATCTTTTCAATAGTGGCTCTGCGGCACAAGAATCGCCC
AAAGCTGGTGCCTCGGCCAGCAGCGCAAGTGCTGCGAGCTTTGATCCCGATATGGACGAT
AATTTGGAAAATTATATAGTCAATCCAGGGAGAAAATCGTCATCTATTCCAATGACTGCG
ATAGGGAGACAGAGATTAATTTTAAGCCAAGAGAAGCCAGTAGGTAAAACTGTTGTATTG
CATGGTGGGTCTAACGGTCTCAACGTTCTTGATGATATGTGGTTGATGGACTTAGAGTGT
GAGACATGGACTCCAATAGAGACATTTGCAAAGGCAGATTCGAGCGAAGACGGTGATGAA
AAATTGGATAGTGTGAACGTAGGTCTCGTTGGCCACAGAATGGAAAGTATTGGACGAATA
TGTGTATGTATAGGTGGTATGGTACAAGAGGATGTTGACCAATTTTACTCGGAGAATGAT
GATGAGCCTCCTCGAAAACGCAAGGTCGATACATTACCGTTGGGTGGTAATTTTTTGAAC
ACAATTGATTTAAGCACGCAGTGTTGGGAAGAACATAAAATTACTCTGTCCAAGAAGGAA
GACGATGAGGACAGACAAGATAGCGAAAATGAAGATACAAATTCAAATATAGTAGTTGGT
GTCGGTGGCACTTCTTTGCAATGTGACAAAAGTATTATTTTGATTGGCGGATTGATATCT
AGACGGAGCAATGTAAAAGAAATATATTTACATGGTACCATAACGAAAAGTATTTTTCCT
AGCGTAAATCCTAGTGCATAAAAAGGCAGTTTTCAATGCTTTCACTTTGTAAACTTTGTT
TAGTAGTAGAATATAATATATTCAGTTTTGTTTTATAGTCACATAACACTTTGTCTTTCA
AAGAATAATCTCCTTCGCAATACCAGCGAAATATTTTGGCAAAAAATTAACAATTAGGTT
CATAGTCCCCTAATTCAATTAATCGAAAAAAAAAAAATAAAATATAAGGGAAGATTGTGC
TGATGAAATAGACAATGAAACAATAATGAAGAATAAAGAAGAAGAAGATATAAAACATGC
CACCACCATCAAGAAGTAGAATAAACAAAACAAGAACATTAGGAATAGTGGGTACAGCTA
TAGCAGTGTTGGTCACGTCCTACTATATATATCAAAAGGTGACAAGTGCAAAGGAAGATA
ATGGGGCACGACCTCCAGAGGGTGATTCAGTAAAAGAGAACAAAAAGGCAAGGAAGAGCA
AATGTATTATAATGAGCAAGTCGATACAAGGACTGCCCATAAAGTGGGAGGAGTACGCCG
CTGATGAAGTGGTTTTGCTGGTACCTACGAGCCACACTGATGGATCAATGAAACAAGCCA
TTGGGGATGCCTTTCGCAAGACGAAAAACGAACACAAAATCATATATTGCGATAGCATGG
ATGGATTATGGTCATGTGTAAGACGGCTAGGTAAATTTCAGTGCATATTGAACTCCAGGG
ACTTCACAAGTAGTGGTGGTAGCGATGCAGCAGTCGTTCCTGAAGATATAGGCAGGTTTG
TCAAATTTGTTGTTGATAGCGATGTAGAGGATGTGCTGATTGACACTTTATGCAATTAAT
GTAGAAAAGAGTTTCTTGTAACAGTATGTAAAGAATAAATAATTATAAGTATAAATAAAA
AGAGAAGGTGAAATAATAATAAGTAAGCAGCTCGGTTATAAGAGAACAAAAACACACGAA
AAAAAAAAAGTCGTCAATATAAAAAGGAAAGAAATCATCATTACAACTTGACCGAATCAA
TTAGATGTCTAACAATGCCAGGGTTTGACAATGTAGAAACGTCGCCTAGTTGGTCACTTT
CTCCTGCTAGGATTTTTCTTAAAATACGTCTCATAATTTTGCCGGATCTTGTCTTGGGCA
AGTCATCCACTAAAATGATCAATTTTGGTGCGGCAAATGGCCCGATGTCTTTTCTAACAG
TAAAGACCAAATGCTTCTTGATATCTTGTAATTCATCATCTGTTGCGGTGGACCAACTAG
ATTTGTTTTTCAACACCACAAATGCAGCAACTGCTTGACCAGTCAAGTCATCGTTGAATC
CGACAACAGCACACTCGGCCACAATTGGATCTTCGATAATAGCAGCCTCAATTTCAGCGG
TAGACAGACGGTGACCAGAGACGTTCACCACATCGTCTACACGACCCAAAATCCAGATAT
AACCATCCTTATCCTTTGCAGCACCATCACCAGTGAAATAGTAGCCAGGGTAAGGGTTCA
AATAAGTGTCTAGATACCTATCATGATTTTTCCAAATAGTTCTTGCAAATGATGGCCATG
CAGCTTTGACGGCAAGGACACCCTCTGCGTGGCTGGTGTTAAGTTCTTCACCAGTGTTAG
GGTCAAGAACAACTGCATCAATACCGAAGAAGGGGAATGAGGCAGAACCCGGTTTCATTG
GTGTAACACCACCAGCCAGCGGGGTGACCAGATGCGAACCAGATTCTGTTTGCCAGTAGG
TGTCTACAATGGGGATTTCATTTTTACCTATTTTTTCAGAGTACCACTCCCAAACTTCAG
CAGCAATTGGCTCACCGACCGAACCCAAGCAACGCAAAGATTTTAAGGAATGATTTTCGA
TGTAGGAATCACCAGCTCTTTTCAACAAACGCAAAGCAGTTGGCGCAACATAAAATTGGG
TGACTTTGTGTTCATCAATAATATCCCAATAACGGGAGTAATTTGGGTACGCAGGAGTCC
CTTCAAAGACCAAAGTGGCACAACCATATAGTAAGGGACCATAAACCACATAAGTGTGGC
CTGTAATCCAGCCAATGTCTCCAGCTGTGAAGAAAACGTCTTCTTGGTGAGTGTCAAAAG
TGTAGCGCATGGTCAACAAAGCTCCCAGCAAGTAACCTGCGGTAGAATGTTGAACACCCT
TGGGGGCACCAGTAGAACCAGACGTATACAACAAGAATAATGGATCCTCAGAATCAACGG
GTGTGCATGGATAGTAGGTCTTGTATTTCTTCTTTTCTGTTGCCCAATCCAAATCTCTGG
GGGCATGGAAAGCAACAGATGGATTGTTGGTCTTTCTATAAACCAAGACGTGTCTCACGC
CTGGGGTCTCTCTTAGCGCGTCATCAACAATTCTTTTAGTCTCAATGACTTTACCACCTC
TGTTGGATTCATCTGTAGTGATGACAACTTTAGAGTCCCCATCGTTGATACGATCTCTCA
AGGAGTTGGAAGAAAACCCGGCAAAGACTACGGAGTGAATGGCACCGATACGGGAAATGG
CCAACAAGGTTATGATTGCTTCTGGGACCATAGGCATGTACACGGCAACAGTATCGCCCT
TGCGAACGCCCATAGAGTAAGTCAGCACTTGTGCCACTTGACAAACTTCTTCAAGTAGTT
CCTTGTAGGTAATGGAATAGCCTTGGCCAGGCTCGTCACCTTCGAAAATAATGGCTTTCT
TGTTAGGAGTCTTCAAGGCATGTCTGTCAACACAGTTGTAACAGGCGTTTAATTGGCCGT
TGAGGAACCATGCATTGTTCTGGAAGGAGGGCCTGCCCGTTTTAGGGTCTGGGATGAACA
CCTTATCGAATGGCTTAGACCAGTTTAAAAATTGGGTAGCTTTAGAACCGAAGAACTTAG
CAGGGTCTTCAATAGACTCCTTGTGCAAGCGCTGATAGTCCTGCAACCCGTCCAAGTGTG
GAGAATAGTGGGTAGCAATTGCGGGCTGCAGTCTATCTGAGATGGGCCGTTGTGGCACGA
TCTTGACCGAAGTCAAATGTTCATACTCATGTTCCTTCTTCTGCTGCGCAGTGGCGGCAG
ACTGGGACATTTTTGCTTTCAACTTGTCAATTTCACTTGACTGTTCTTCTAGTTTTGATG
ATTGTACGGCAGAGGGCGACATAGCACAGTGGGCAATGTCTTTCTAGTAGTTTTGATATG
TTTGGTTTTGCTTATAGATAGAAAATATAAGAACAAGATATAACGTACTACCAGATAACC
TAAGGGAGAAATATGCTTAGAATAGCCGCCCAGTTTATATACAAAATGAAGGGAGAACTA
TTTGCCACCGAGGAACTGTACCCCAACTGCAATACCCATTGAATAATGGCATCGGAGGCT
CGGCGGCAATTCGTACCCCAACCTTTTTTTTTTACTTTTCTTTGGATCTTAGAGATAACA
GAAAAAAAGGATGACCCCAATCATTTGCCACGGCATGTCAACAGGTGAGTGCCTTTTGAG
GGGGGGGGGTCATCTCGACATCCGGCGAAATGGAGCAGTCACACGTGAACATTTTTAGGG
GATGGAGAGTGCTACGCCGTTCGTCCGAGATGATTATCATATTTACACAGCCGTACATAC
ACGTGCCATTTATCTTGATATCATTCTGGACGTATGTGCACATGTGATTTGCTTTTGTTT
TTTTAAGAATGTCGGGTAATAAACAGATTGTTTTTCTGGGAGGATAATCTTTTCTTTTTT
CCTGTTGGTATTCTAAAATTAACCTTGCTGTTTCTTTTTTTTTTTTTTTTCGCGCGACTA
CTCAGCCATCTTGCATTTTTAAAGAAAAAGATAATCATTAATGCCTTCACGGGAATACGT
ATAGAACATTATTAAAAGTATATGAATGGCATATATATATAGAACACCACCCTTGGAAAA
CATTTATACCCCTTAAACTAAAACAATTTGCTGCGCTATACCGTGTTTCAGTGTATTATA
ATACATTCATTTCTGTTTCATTACGATTATATTGACGTGATAAAAAGATTATATAGCCAT
GATCTTCCTAAACACCTTCGCAAGGTGCCTTTTAACGTGTTTCGTACTGTGCAGCGGTAC
AGCACGTTCCTCTGACACAAACGACACTACTCCGGCGTCTGCAAAGCATTTGCAGACCAC
TTCTTTATTGACGTGTATGGACAATTCGCAATTAACGGCATCATTCTTTGATGTGAAATT
TTACCCCGATAATAATACTGTTATCTTTGATATTGACGCTACGACGACGCTTAATGGGAA
CGTCACTGTGAAGGCTGAGCTGCTTACTTACGGACTGAAAGTCCTGGATAAGACTTTTGA
TTTATGTTCCTTGGGCCAAGTATCGCTTTGCCCCCTAAGTGCTGGGCGTATTGATGTCAT
GTCCACACAGGTGATCGAATCATCCATTACCAAGCAATTTCCCGGCATTGCTTACACCAT
TCCAGATTTGGACGCACAAGTACGTGTGGTGGCATACGCTCAGAATGACACGGAATTCGA
AACTCCGCTGGCTTGTGTCCAGGCTATCTTGAGTAACGGGAAGACAGTGCAAACAAAGTA
TGCGGCCTGGCCCATTGCCGCTATCTCAGGTGTCGGTGTACTTACCTCAGGGTTTGTGTC
TGTGATCGGTTACTCAGCCACTGCTGCTCACATTGCGTCCAACTCCATCTCATTGTTCAT
ATACTTCCAAAATCTAGCTATCACTGCAATGATGGGTGTCTCAAGGGTTCCACCCATTGC
TGCCGCGTGGACGCAGAATTTCCAATGGTCCATGGGTATCATCAATACAAACTTCATGCA
AAAGATTTTTGATTGGTACGTACAGGCCACTAATGGTGTCTCAAATGTTGTGGTAGCTAA
CAAGGACGTCTTGTCCATTAGTGTGCAAAAACGTGCTATCTCTATGGCATCGTCTAGTGA
TTACAATTTTGACACCATTTTAGACGATTCGAATCTGTACACCACTTCTGAGAAGGATCC
AAGCAATTACTCAGCCAAGATTCTCGTGTTAAGAGGTATAGAAAGAGTTGCTTATTTGGC
TAATATTGAGCTATCTAATTTCTTTTTGACCGGTATTGTGTTTTTTCTATTCTTCCTATT
TGTAGTTGTCGTCTCTTTGATTTTCTTTAAGGCGCTATTGGAAGTTCTTACAAGAGCAAG
AATATTGAAAGAGACTTCCAATTTCTTCCAATATAGGAAGAACTGGGGGAGTATTATCAA
AGGCACCCTTTTCAGATTATCTATCATCGCCTTCCCTCAAGTTTCTCTTCTGGCGATTTG
GGAATTTACTCAGGTCAACTCTCCAGCGATTGTTGTTGATGCGGTAGTAATATTACTGAT
CATCACGGGACTTCTGGTTTATGGAACTATAAGGGTTTTCATCAAGGGAAGAGAGTCTCT
CAGATTATACAAGAATCCTGCGTACCTACTTTACAGTGATACCTACTTCTTGAACAAGTT
TGGGTTCTTATACGTTCAATTCAAAGCAGATAAGTTTTGGTGGCTTTTACCCTTATTAAG
TTATGCGTTCTTAAGATCCCTGTTTGTTGCCGTTTTACAAAACCAAGGTAAGGCTCAAGC
AATGATCATCTTTGTCATTGAACTAGCTTACTTCGTTTGTCTCTGTTGGATAAGACCATA
TTTGGACAAGAGAACTAATGTTTTCAATATTGCTATTCATTTGGTGAATTTGATCAATGC
ATTTTTCTTTTTGTTTTTCAGTAATTTGTTCAAGCAACCAGCAGTGGTTTCGTCAGTGAT
GGCGGTTATTCTGTTCGTTTTGAACGCGGTGTTTGCTCTATTCCTATTATTGTTCACTAT
TGTCACCTGTACACTGGCATTACTACACAGAAACCCAGATGTCCGTTACCAACCAATGAA
AGATGACCGTGTGTCATTCATTCCTAAGATTCAAAATGATTTCGATGGCAAAAACAAAAA
TGATTCTGAACTGTTTGAATTGAGAAAAGCTGTTATGGACACCAATGAAAATGAGGAAGA
AAAAATGTTCCGTGACGACACTTTCGGCAAGAACCTGAATGCAAACACAAATACAGCAAG
ACTCTTTGATGATGAGACTAGTTCATCCTCTTTTAAGCAAAATTCCTCTCCCTTCGATGC
CTCGGAAGTAACGGAGCAACCTGTGCAACCAACCTCCGCTGTCATGGGTACGGGTGGCAG
CTTCTTGTCTCCACAGTACCAACGTGCGTCATCTGCTTCTCGTACTAATCTAGCGCCGAA
TAATACAAGCACCTCCAGTTTAATGAAGCCTGAATCAAGTCTCTACCTGGGGAATTCCAA
TAAATCATATTCGCATTTTAACAACAACGGCAGCAACGAAAACGCCCGCAACAACAACCC
ATATTTGTAATCCAATATATACTCACATGTAACAACTTATTATATAAATATTTAAGGGCA
AGGATATCCTACATTATATTTCATAGAAAACCGCTCAAAAAGGTGTATTATCTCCATTAC
ATCCCAACACCACACATATTTCAGCGATAAAAACCTTAAATGTGAAATTCGCTTTGGCTC
TGCTTCCTTAAATGTACGCAATTGCCGCTTTTTTCTGACATCTTTTTTGACGTGTAGAGA
AGGAAACAGATCCTCCAGAAGGGATTTACTGTTGGCTATTTTGTGTTAGAAGCAGGTTAA
TAATAGATTAGGTTGCGTAAGTCATGGTCGAAAATAGTACGCAGAAGGCCCCACATGCCG
GAAATGATGATAATAGCTCTACCAAGCCATATTCGGAGGCGTTTTTCTTAGGGTTCAATA
ACCCAACGCCTGGATTAGAAGCTGAGCACTCAAGCACATCGCCTGCCCCCGAGAACTCCG
AAACACATAATAGGAAAAGAAATAGAATATTGTTTGTCTGCCAGGCTTGTAGGAAGTCAA
AAACAAAGTGTGATAGAGAAAAACCTGAATGTGGTCGATGCGTCAAGCATGGGTTAAAAT
GTGTTTATGACGTATCAAAACAGCCAGCACCACGAATTCCGAGTAAAGACGCCATTATAT
CAAGGTTGGAAAAAGATATGTTTTATTGGAAAGATAAAGCTATGAAGCTACTAACAGAGA
GAGAGGTGAATGAATCAGGCAAGAGATCAGCAAGTCCGATCAATACAAACAATGCTAGCG
GGGACAGTCCTGATACCAAGAAGCAGCATAAAATGGAACCTATATATGAACAAAGTGGTA
ACGGGGATATAAACAATGGTACCAGAAATGATATTGAAATCAACTTGTATAGAAGTCATC
CAACCATGATCATGAGTAAAGTCATGAAAAGAGAAGTTAAGCCGTTATCTGAAAATTATA
TTATAATTCAGGACTGTTTTCTAAAAATCCTGGTCACTTCAGTGTTCCTTGACACTTCAA
AGAACACGATGATACCGGCATTGACGGCAAACGCGAATATTACAAGAGCCCAGCCTAGCG
TAGCAAATAACCTTTTGAAATTGAAGGAAATGCTAATCAGACAGTGTCAAACCGAAGATG
AAAAAAATCGTGTAAACGAATTCACTGATAGAATACTACAAAATACAAATTCAAATAGAA
ACTTGAAAATCGGTATGCTATTATCAATGCTTTACAATTCTGTCGGTTACCAATATCTGG
AGGATCATTGCCCTCAAGGTGGCGAATATTCGGATTTATTGAGAAATTTGATCAATGAAT
GTGAAGCTATTTTGCCATCTTACGAAATTATTGAACGCTACAAGAACCACTTTTATGAGT
ACGTTTATCCAAGTCTACCTTTCATCGAATTAGAAATTTTTGAAGAATCATTAAGTCAAA
CAATTTTTCCGGACCCAAACAACCCCTCCAAGGTGCAAATACGTATGGGTAGCACACATT
TGAGAGCTAAGGTGGAAAACTTGAGTCTTCTATTGGTTATCTTGAAACTCTCATACATGT
CAATAAGGTTTTTAGATCATAGTACAGCAGACTCGAGTTTTTATCTTTCAAAGGAAATAA
TTGATAAATACCCAATACCGAACGATTTTATTTTATTGAGTCAAAGATGTCTAGCATCGG
AAAATTGGTGTGCATGCGCTAATGAAAACATCATATCATGTTTACTATATATCTGGTCTT
TTTTTGCTTTTTCTCCTGAAGAGGGTGATTTCTTTCTCGAGCACCCCACCGATGTTATCA
GTAGTTTGATAATGATGCTTTCCACCTCGATTGGTCTCCACAGAGATCCTTCAGATTTCC
CTCAATTGATTTCCCCGTCCACCTCAGATAAAAGAACCTTGAATCACAGAAGAATACTCT
GGTTGAGTATCGTTACCGTTTGTTCGTTTGAAGCAAGTCTCAAAGGTAGACATTCTGTCT
CACCGATATCTTTAATGGCCTTATTCCTAAATATTAAGGATCCTGATTCTCTGACGGTAT
ATATGAACCGAGTTAGGGGCGATCTAAGCGATATCAATAATCACAAACTTTTGAGAATTC
ATAAATTTACATTCAAGAGAGCCCAGCTTGCGTTACTCCTGTCGGACTTAGATAACTTGA
CGATGACATACTATGGTAGTTTCCATTTGCATTCAATTGAATTCATAAGAGAAAAGATTG
AGATTTTTGTGGAGGAAAACTTTCCCATAGTACCATTAAAAAGTGTCGCACAGGATAAGT
CAGACCTTGATGACATGAATGTGATTTCAGAAATGAATATATTATCTTCAGAAAATTCTT
CTTCATTTCACAATCGAATAATGAATAAACTATTGATGTTGAGAACTTCAATGGCCGTAT
TCTTGCATTTTGAAACACTTATCACTAAGGATAAAAGTATCTTCCCATTCTACAAGAAAT
ACTTTATGGTTAGCTGTATGGATGCGTTGTCACTAATAAATTATTTCAATAAGTTTTTCA
ACGGAGAATATCGACACGCAATATCTTCTTTAACCAGTTTTAATGTTACAAAATTTATTC
AGTTAGCACTATCCAGCACAATCTTCAGCCTATTAGGGATTATACTAAGAATAGGTTTAG
CCATCCATATGTTATCTTCTGAAGTACAAAAGTTATCGGGAACGACAGATCCAAGAATAA
AGGAGTTAAATACCAAAGTCGAAAAATTTAGTACCCTGCAAAGAGATCTCGAGTCTGCTT
TAGAAGGTATATATTGCTCTGCTTCGGAACATTTAAGATTCACATACTTCCCCGTTTTTA
AGATGTTGGCTTTATTCGATGTCATTGTACAAAGGATGAGAAAGGGTGAATTATGGCACG
GCATATTTACGATGATTCAAATGGAACAAATGCATTCTAGGATAATCAAGACATTAAGCA
TTACCTTAGGAGTCAAACTGGACAAAAAGGATAGGCTATTAGAGGAATTGATGGCATGCA
ATCACGTTGCGAATTTTAGCGTTGAAGATATAGATGAGCTGAACCGTAATATCAAAAAAG
AGATTCAAATTTCTTCAGGATTGAAGCCGCCTGTAAACACAATTGACTTAACCAACGGCG
AACCATTCGGAAATGCTGTTCCTACCTTCACAAAGACATGGAGTTCATCCTTAGATAATT
TAGAAAAACTATCATCGGCCGCTGCAGTTGGTCAGAGCTTGGACTACAACAGTGGTTTAC
GTCAGGGTCCTTTGGCGGGTGGTGGTTCAAAAGAGCAAACGCCAATAGCCGGGATGAATA
ACTTGAACAATTCAATCAATGCTACACCAATTGTCGATAACTCATCTGGATCACAACTTC
CTAATGGTTTCGATAGAGGCCAAGCGAATAATACTCCTTTTCCAGGTTATTTTGGAGGTT
TGGATTTATTTGATTATGACTTTTTGTTTGGCAATGACTTTGCTTAAAAATTTTCTTTCC
AAACTCCTACCTATTCATTTCATCAATTAATTAATATTATATAGCCACGAATTTATGAAA
CTGACCGATAATATAAAGTGCTCAATATATATATATATGTATATAACGGTTAACGTAAGA
AGAGCTCTTCCCTCTTAAACATTCGAAAAATGATTGAACCAGTATATTTGGTCGAGCAAG
ACTTTCTCCTTCGCATATTTTACGGCAGGTATGGATATATCGCCTCTTGCTGCAAACCCG
TGAGCCACACCACTGAAGAGGTCTAACTGGTAAGTAGCGTGATTATCCTTTAATTTTTCC
TCCGTTAAGTGTCTTAAGTTTGCCGGAAAGATGTGATCCTCTTCCGCTGCTGAAATCAAT
ATTGGTTTCTTGCTATCAATTGCTTCAATTTCCTCGATGCTGACGAAAGATGGATGTGCA
ATGGCTGCAGCATTGGCAAGACCCCCGTCGCCACTAATGTGTTGGACGGCAAACTTTGCA
CCAAAACAGTAACCCACAACGCCAATAAACTTTGGGTCATATTCAAGTTTTAACAACTTC
ATGAATCCATCAACAATTTTCTTGGTGACTTCAGGAGAATGTCTTTGAAACCAGGCATCA
CGATCAATTGGTTTGTCCGATGAGATAGCATCGCCGAATAAAATATCGGGAACAAAGACC
ATGTACCCAGCACTAGCAAATTTGTCGGCCGTTAATAAAACATTGTTGAATTTATTGCCA
TACACATCTGTCAAGATAACTATAACTTTTTCCTTGGGAGATGTAGAGCCTGCTGCATAA
GTATCTAAACCGAAGATTTCTTCACGACGACCCTTGGGTGTTCCATCGTGACAAACTCCT
TCAAAGCAACACTTGCCAGGTTGATTAGATGCCATTTGATTGAAATAATTTTGTTCTGCT
GTAGTTAGACGTAGTGGAAAACTTTAAGTCTACTGAGTCTTGAGACCTTATCACCCTTTG
AAGGTTTCTTGCAAATGAGCGTGGTTTGGCATTTTTTATCGGAAAGAAAAAAAGGGCTCC
GCCTTAGGCCAGATATCATAGAAATGCAACACTTCCCTAATATAGAAATTTGGGCATTAA
TTATTTTGAGAATTTTGATGATTTGAATAATTTCATTAACGTAAAGGAACATAGTGCTAC
GAATCCAACAGTGGACCCAAAAATGAGAGCCGTTTGTCTGTAGTCGACATCTTTTGCTGC
TGTTTCTTCTGGCAATCCCGGAGTGTTTTTGCCAGGATCAAGAGCAGCTTCTGTGATTTT
AATAAACAATTCATTAAGGGAACTTAGCCATCTGGATGATATGTGCAGTGGGTGGTTCAC
AAATAGCTCGTCTGCCAGTTCATCTGGTTGGATTTGACACCTTTGTTGCTGCTTATCCAA
ATCTGCCTTAGAAGCTACAAATACCAACGGTAGATCTTGTAAATGTGTGAATTTGTCTAG
AAGCGAAACTAAGTAGGAGAATGATTCTGGGTCGCTGGAATCGTATGTTAGACAGATTAC
GTCACATTCTTTTAACTTATCCTTATTCTCTAGTATGGCGTATTCCTGTTCTCCAAGTTC
TTGCAAAATCAAATAGTACTGTTTCCCACCTTTGAGTTCTAAACTATTGACTGCAATTCT
TGGTTTGATTGTCGGAGAATACTCCTCCGAGAAAGATCTGCCCAAGAAGGCCTCTAGCAA
AGAGCTTTTGCCGCAACATGGCTTTCCAATGACAAAGCAATTGAACACTTTTCTGTCATT
GATATTGGATCTGTAAAGTTTCCCGGAACGGCGTCTCATTTTCCTTGGCTTGGTTACTTG
TAGGGCTAGTCTTGCATCTTCCTGAAAGCCAAAATACACCAAGTAAGCGGTAGTTGTGCT
ATAGTTCAAGAAAGTCGTCATACTCCATTGTGCTAGCCAGCCTTGTAAGGTGATGCAACC
CTTGTTGTTTACGACAGTGGAGAAGGGGAAATTCGTTGAGGTCCATAGTTTAGGCAGCCC
TGGTGTGCACTTAAATAGACGATGTAATTCTTGATTATTCAAACCACCATCATTGTCGAT
ATCAAACTTCAAAAAAATATCTACAAGAAATCTGTAGCCCTTGGGGCTCAATTCCACACT
GGAAGTGTCAGGGACAACCAACCTCGGATGGAGAATTTTGTCATTAATACACAAGGAATC
TGTGTAATGGAAAGTTCTTAGGATAGCCCATGTAGTTTCGTGTCTCCCCCTTTCAGCGTA
TATTTTGTTCAGTACAAGGAAACCATCTTTGGTGATGCCTTTTCCCGGTACGTATAGCTT
GCGGTTAATGTACTCTTGATCGTGCTTGGAAATATCCAAAAGCAAATCTTTAATAAAATT
CAGTTCGTTTACATCGATACTCTTATTGAAGCACTTTTTTTGTAAGCCCAAGATTTCGTT
GTCATCTAAATATGAGTCCTGGTTTAAATCGCTTAAAAGAAAAATTCTTTTTAAAGCCAT
GACAGCCAATGGCTTTAGTTCACCTACCATGGCATCAAATAAAGGTGATATTGGGTGTGT
TATAGCCCTTTGGCAAAGATAAAACGCTTGGTTAAGATCAAACTGTGTCTTGGCACTTGT
CTTAATGCAAGTGTCGATTTCTTTAAACTCCATTAATATTGGGATAAATTCTTCATCCTC
CACTTTGGTATCGATATCATCATCACTGTTCTCTGACACGACCATTGCATTGGCATTAAC
ATTCGATATGGAATCACATTTATTTTTGCAGAGAATGACAGGAATATTCAACCCCAGGGA
TCTGAAATGAGGCAACCAAAAGAGAGAAACATGGTCATACGATTCGTGATCGCAATACAC
AAGCCAAATTACGTCGGCGGACTTCAACTCATGGTCTAAAGCTATGAGGTCCGAATCTGA
AGTGTCTATAAGTACTGTATTCTTAGGAGAATATGTAGGTGATGATGAGAAATCTCTTGG
GATACTGATGGGTGGCAGCACGTCCTGTATGGTCGGTATGAATTCAGCTTTTGTTAATGA
TACAATCAGACTGGATTTACCAACCCCTTCATCACCGCAAATAACTACCCGAATCGTTTC
TTTAGTCATTGTGTTGTTCAACACATTAGTATTTAGAAGTCCGCTATTTTTGTTTTCAAT
TTTTATTTGTTTAATATACAAATTTCATTCTTGTTTTGAGGGTAAACCACTATACCAAAT
GTTGAAGATCTAAAGGTATCGATCAAATATGTTGCTAGAGAGTGACTGAGTGTTACATTA
AATATATTTATATATAAACGTATGATATTTAGGGATTGTTGATTGATAGGTTGAAAAGTT
TCGATCTCAATGACTCATTTTCCTGTTCTAAAGCCTTGATTCGAGCTTCTGAAGCGTTAG
CATCGAGCTTCCGTCTTTCTCTTTCGGATATCCATCTTCTTTGTAACTCCTCTATTCGTA
AGGTCAGTTCTTTATTTGGAGTTGCCGTTAATTCATTGCCCTGTTGATGTGGCTGCTCTG
GGGTTTCCATGGAAATCAGTGAAGAGATATATGAGTTTATTATGGACTCTAATGCAGTCT
CTATAAAAGTGTAGAGCGATTCTAGTTTGGGCTGAATCAAATTCAAGTTTTTCAACGCAT
TTGGTACAGATTTTATGGATTTCATTTTCCTGTCAAATTGGGCAATAGAACTTTCTTGTA
AGATTTTCTGCAGAATATTGAAAATACTGTCAAGGTGTAGTAAAAGGTTCTGATTAAATT
TGATAAAATTGCTTTCATATTGGGATAGTATTAACTTTTGGTTGTCCAAAGTATTTAACT
GATTTTTTAATTGGTAATTCTCCAAGTCTAATTTGTCTAACTGATTTTGTATTACGTGGA
ATTCCTCTGATTTATCGATTTGAAGGTCATTGATTTGTTTTTCCAAGTCATTGATGTAGC
TGTCCCAATTATTTTCCTTTAGTTTATTGATTTTGGTCTGAGTTTCCAGTTCTTTGGTTA
AAACTTTTTCATTTTGTTTCATTTTAATGATGTCTTCCTTCAATTTTTCCAAATTGTTTA
TCAAGACAGATTGCGATTCGATCTTTTCCTTCAGTTGGGAAATCAAATGATCTTGTTTTT
CTATAACGGAACTAGAATTTTCTTCCAATTCTAAGGAATCTAGTAGATGAGACTGCTCAT
TTAGTTTGGACGCTATTATTTTTTCTAATTTTTGCGATTTCTCGAATTTCAATCTAATGG
AATTTATAAATTGATCATATTCTTTGTGCAAATTTTCTATGACAATCTCTAATTGAGTGT
CTAAGGTTTTCTCAAAACGAGACTCGACGGCTGAAATTGGTAAGGAAGTACTGTTTGCCA
TTACATTTTCTGTATCAATGTGGTTGTTACTGTCATGAATTTCGTCATTCTGGTATCCAC
CATCAGTATTCTCCTCTTTACTTGATGGTGAGTCCCTACTTTCTAACTGTGATCCTGCTG
GTGAGGACTGGGCCAGTGAAAGAAATTCTTCCTTATCCTGCTTTGATTCCGCTCGACTTT
TGGAATGCAAAAAGTCCTGCAAGAATTGGATGATGAACTTGGACAAAGTATCCATTTTTT
CAAGAACATAATCCGAGCTCAGCTCTAAAGTTTCCTCCAGGGTCTCCCTCTCTTCTTTAT
CAAGAAGATGGGCATTTTCATCTTGCTCATTAAAATGCGTCAATATAAAGGACAATAGGT
GATTGATCGTATTCACGATACTTTCCGAATTTTCTAAATTCTCTTGAACGAATTGTAGCG
TATCTTGGTACTCGACTTCCTTCGCCTTTAAATCCTGTTTCAATTTGTTTATTTCAAGAT
TTAGACCCTCGATAATCGAATTTCTAAAATCAGTGTCATTGCCCAGCGATGGTGCATTGC
CGTCTTTATTAGGGATTCTGCGAATGTATTCATAGAGTACTTGAATCTTGATTTTGGCAT
TAGTCAACTCCTTCTCCAAATTTTTGACTTTGTTGGAATCGTTCATCAGAGCAGGCTTGA
TGGGATCGTTATGAGATGACCTCGTGGTCATGGAGTCCCTGAGTGATGGTATGGACATCC
CAGAATCCATCGAGTTTGTGAACTCGCTGTCGTCATCATCACCAGTGTTGTCATTATTGC
GAAGATGCCTGCCACTAGGAATCCATCGACGTACCATGGCTATAACTTTCCTTATGTTGT
TTGCTTAGTTTTTTGATATTAGTGTTGCTTATGTGAAATTTCGCGATTTCAATTAAAATA
ATAAATACATATATAAAGAATATACACAGAGGGAAGCAAAAGTAAACTAAAAGTGATACT
TACACGAGCTTTTTTGGTTCCAAACTGTTCATGATGATGCCGGACCCTTCCCAGTTGACT
TCTTAGTGGTCAATTGTAGGCCATGCCATCTGGAAATATCGTCCCTCAAAATTCTGTTCA
CCAGCTGGTGCTGCTTGATGAGACTCAGTCCGTTGAACTTCTTGCTTGTTATGTTGATAG
CAAACATGGATCCGCAGCCACCGGAAACGTCTTGCACTTTACACACTTCAGGTTCCAGTT
CCTGTTGTAGTTTATCGGTGATCATCTTCTCCTCCGGAGTCATTGCCATCTGCGTTGAGT
ACCAAAGCTTTGAGCCCGTCAGAATCCTTGGCCACCGGACATGCTTCACAGATATAGAAC
GTAGCATGGTCTGTGGGAGCTTCATTTCTATGTTTTACCTTCTCTTTTCGCTTTTATGGT
TCTCAGTGACCAAATAAAGAAACTTATATATGTTCCGGAATGACGAATCAAAAAGAGAAT
AGCATCGTTAGCAGCAAACGAAAGTGGAAAGAGAATAATGTTCAAGAGAGCAATGAGCAC
AGATGGTCCCGTGGCACGTACCATCCTGAAGAGACTGGAATGCGGCTTTCCAGATTACAA
GAACTTTGCGTTTGGCCTCTACAACGATTCTCACAAGCATAAGGGCCATGCTGGTGTACA
GGGAAATGTCTCTGCTGAGACACATTTCCGGATTGAGATGGTCAGTAAAAAGTTCGAAGG
CCTGAAACTTCCACAACGCCATCGTATGGTTTATTCCCTCTTGCAAGACGAGATGGCTCA
GGCGAACGGTATCCATGCTTTACAATTGTCACTAAAGACCCCACAGGAGTATGAATCCAA
AGCGAAATAGAATGCATAAGCATAAGTGTACACGTTGAGTTTATTGTTTTATTTCCCCTA
CATATATATACATATATATGAAATTACTTTACGTACGTATAAGCTTTGTTCAGTCATCAT
GAACCAGTGTCTTTTCGTACTGTTCTAAGGACATTAGACCCTCGACCTGTTCCACATTAA
CGCCCTCACCAAGCTTCATTTTGACTAGCCAGCCGTCACCCATAGGATCTTCGTTCACCA
CACCTGGATTTTCCTCAAGATTAGTGTTAATTTCCTCTACGGTACCATCGGCAGGCTGGT
AGATCTCGGAGGCTGACTTGACGGACTCAATGGACCCTAGCGACTCACCTTGGGCAATCT
CAGTGCCCACTTCTGGCAACTCAACATAGGTAGCGTCCCCTAAGGCATCAGTGGCGTATT
TTGTAATTCCGACAAAGGCAGTCTTGTCCTGATGCACAGCTATCCACTCATGTTGGGAAG
TGTACCTCACGGCTTGAGGTCCTTGGGATGAGTACAAAAATGGTAGTTTATTCTTGTTTA
GGGCATTGCCGGAGCTGTTTCTCAAAAACAATTTGCTCACAGTGGGCATGCGGGTGGTCC
ATAGTCTAGTAGTGCGTAACATTGTCGATGTGGTATGCTTCATGTGGAGATTCCCTTTCC
CATTAGATACTTGTTTGTTGGTCTGTATATATAGAAGAAAGAGTTAGCGAAAGTGACTCC
GCCGCTGAATGACTCCTTACGGAAGTGTCAAAATTGCGAGGTCCCTATAGCACAGAATGA
TAGATAAAACATTGATTTGCAAGTTGAAGGAAGACCCTACACATGCGTATATATGATGTA
TGTAATGGTTGTGATCATTTTAGCCTGTCAAGCAGTGAATCGCACTGCTTGTGTAAGCCT
TCATCTTCTTGCTTTAGCTGATGCAGCAGGTCGCGAACAGTGTCCTGCACTGGGGGTCTA
AACATAATGAGAAACTTTAGCGTTTGGAAACCAAGGGAACTTCTTGCCGGATCCAGGCAG
ATAGGCTTCAGTGCCTCAAGATGATCGCTTTGAAGACTGGGCAGTTCGCTCATAAGTCTG
ATGAAGAATCGTCTGTGTTTGTTTTCAAGGAATGGACCCAGAGACTCGAGAACTCTTAAG
GACCATTTTTTGTAGTTAGAGGGATCTTGATGCAGCGAGGTTTGGAAGAACCATTCTTCA
TTGAGCCATTCAATGATCAGACTGACACGTTGCTCGAAATCCTGGATGAAGAAGCCAAGC
AGTTCTTCACGAATCAGGTCACTGGCCTCTTGTGCTTCGATTCCTCTCGTAACCAATCTG
ATTAAGACGTGTAACCATGACGAGGAGTCGTCATCGTCCAGTAATATGGAGGAGGAAGAC
GAAGATTTGGCCCGGGTAGTATCCTGGCGACCGGATAATTCAAACAGTTTCTTGGTCAGC
TTTGAGAGGTACTTTAGTTTTTCATCCTGCGTCAATGAGTCAGGTTCAAAGGGGGGTGCG
ATCTCCTTAATGGCAGAAGTTGATTTGTTGGCATCTCCTGAGATTTCTTGGGCGCTTTCC
TCTTCTTGAAGCATCTTCTGCATTCGGTCATCGTCTTCGGGCTCCTCTGGTTCCTCCGCT
AGTGGTTCTGTTTCCATTTTGATTTTCTTGCTATTAGCCGTTGGGCCATCGTTTCCAACT
TCTTCATTGTCGTTGCCGTCGTCATCATCGTCGGATTTCCTCTTTGATGATGACGAGGAC
GGTACAGAATTGATGTACGTATTCATTAAATCCGTGTACCTCGAAGCAACGATAGACAAT
CCGGTGATCAGTTTCGTGCTGTCCATTTGCAAGATGGCCTCTGTGGACAGCTTGATAAGT
ATGTCATTGGGTAGCTGGGTCACATCCTGGTTGGAGTTCGAACTGTTCATCAATGAGTAC
ACAGATGAGTAGGTGTTGCTGATTGGTTTGGGTGAGTTGTTGAAAAAAGTATTGCCCTGG
TGTGAAGCCTTGTTGAGGGTGTATTTTTGCAATATCTTCAGTTGATCAAGCATGTTTTCG
GTTGAAGAGCCCGTTGCAGGTGCGGACACAGGCGTGGGGGTCTTTGTGGACACCCCTAGA
GTAGACAATAACGCGGATAATTGCCTTTTCCATAGTGAGATGTATTTTAGTTTGTCCTGC
CTGGACAACGTTTTCTTGCTATTGCCCTTGGAAGGGTCGAAGTTCAAAATTCCCTTGCTC
TTGGTCTCTTCGCCAATAACGTGTAAAGTTTGAGAAATCTTGGTCAGCTTGGAGTAGATC
GATGACCCTGATCCGGATGAGAGGGATTTTGTAATGATTTGATTTTTTAGCCCAAATTGC
ACAAAGTTCTTGTACGCCCTTTCAACAAATCTCTTGGATAGTTTGTAGTTCAAGTCAGAC
TTGCCCTCTAGGGGAAACTTGGCGTCGACGTTGAAACGCAACAGCCCGGAAAGAATTCTT
ATTGTTGTCTGCGGCCTTCTTTTGATGACGAAGGATAAAGAATTGATGATACCAATGAAA
ACGGACGAGACCATGTACTGTTCCTCAATTAGGTAGTTTAGCAACATATCAAGAAGCCTC
TTAGCCTCGCTCTCCAAAGCCGGTTTGTTCAACACAGGGTGGTTATCCGGGATGGTAGAT
GAATTAATCTCGTTGCCGCTGGGTGATTTAGTTTGCGACAGCACGACCTCAGATATGAAC
TTGATGGTCGCTAATTTCACGCCGATATTTTGGTCAATCTGCGCCAGCCATTGTTCGACA
TCCGTTTCATCGTCAACGGTGGCACGCAAAGGATATGCAGTTCTCCAGTGCGAGAGCACG
AACTTCTTCAGCATACACAACTGATCAAACATTTCCTGGTTTGATGTCTTAGCAACCAGA
TCCAACACCAGCGGGTATGAAGCGCACATAATAAGCACGATATTCTTGTACACTAGTACG
TCCGCGGTGGATTGCGCCATAGCAAGAAGTAGTGGCAGATATTGAGCAGCAATAAACGGT
CTCTCAGTATTCGCAATTGGAGAGTCCATCGACACCACGTCTAGAACTAACTGTGTAAAA
AACTTGGCCAAAGGCAACTTCAGCTTGCTGAGATTACCGTTGTGGTACATGGATGCCGTA
GTTTCGAGCACCTTGGGCAGCATCTCCGTTGGATTGTTGTGCATGGCCAGTGTCTTGGCC
TGTAACAATTGTTCCATCTCTGCAGATGACATTGCGCTGCTTAGTGGTAGTTATATGCTT
CTTGCCACGATTTAACCATTTGTTCAGTCAAGTACTAACGGTTAAAAGGTATCGAAATAT
GGCAACTTTTCACTTTTAGATCAAGTCACTATATACGACTTGAACATCAGAACGGCGATT
TTCCATCAAGATGGAGTGGAAACCACGCCATTATAAAGGAAAGCTAGTTTTATGTCTCGT
ATACATGCGGAGTAGGACAGTGATATAACACACATAGCTAGACACAATAGACATCATGAA
AAGGTCCACGTTGCTGTCGCTGGACGCATTCGCTAAGACCGAAGAGGACGTACGAGTCCG
CACCAGGGCCGGCGGGCTGATCACTTTATCGTGCATCTTGACCACGTTATTTCTGCTGGT
GAACGAGTGGGGACAGTTCAATTCTGTGGTAACAAGGCCACAATTGGTGGTGGACCGTGA
CCGACACGCAAAGCTGGAGCTTAATATGGATGTGACATTTCCATCGATGCCATGTGACCT
GGTGAATCTCGATATTATGGACGACTCTGGAGAGATGCAACTAGACATTCTTGACGCAGG
GTTCACGATGTCTAGGTTGAATAGCGAGGGTCGCCCCGTGGGAGATGCTACTGAGTTGCA
TGTGGGTGGGAACGGCGACGGAACCGCGCCGGTTAATAACGATCCTAACTATTGTGGGCC
ATGTTACGGTGCCAAAGATCAGTCGCAGAATGAGAATCTAGCACAGGAAGAGAAGGTTTG
CTGCCAAGACTGTGATGCAGTGAGATCAGCATACTTGGAGGCAGGCTGGGCTTTTTTCGA
CGGGAAGAATATCGAGCAGTGTGAAAGAGAGGGCTATGTCAGCAAGATTAACGAGCACTT
GAATGAAGGCTGCAGGATCAAAGGTTCTGCACAAATTAACAGAATTCAGGGGAATCTTCA
CTTTGCCCCTGGAAAACCCTACCAGAATGCATATGGACATTTTCATGATACTTCTTTGTA
CGACAAGACTTCGAATTTGAACTTCAACCACATCATCAATCATTTGAGCTTTGGGAAGCC
GATCCAGTCCCACAGTAAGTTGTTAGGAAACGATAAGCGCCACGGCGGCGCCGTAGTTGC
CACTTCTCCCTTGGACGGACGCCAGGTGTTCCCGGACAGGAACACACACTTTCACCAGTT
CTCGTATTTTGCCAAGATTGTCCCCACCAGATATGAGTACTTGGATAATGTTGTCATTGA
GACCGCGCAGTTCAGCGCCACTTTTCATTCCCGACCTCTTGCCGGTGGAAGGGACAAGGA
TCATCCAAACACACTTCACGTTAGGGGTGGTATCCCTGGTATGTTCGTCTTTTTCGAAAT
GTCTCCATTGAAAGTCATCAATAAGGAACAGCACGGGCAGACTTGGTCGGGCTTCATCTT
GAATTGTATCACCAGCATTGGTGGTGTCCTAGCTGTGGGCACTGTCATGGACAAGCTATT
CTACAAAGCACAGAGATCGATCTGGGGCAAGAAGAGCCAGTAGAGGAAGAGACTGTCATA
GGGAAGAGCCCTTTCTACATACTACTACATAATATATATATATAGTATAGAAATTGGTAT
ATCACTACTTGTACAAATATCATATTGTACGATAATCGCGAAGAACGACGCACTGGTGGG
AAGAAGTGGAAAACAGAAGCTTTAAGGTAGAAACAGAACAAGAATGTGGCTATGGTAGGA
TAGCAGAAGAGTACCATTGCTGTTATCATTTGTTGCCTAGCCCTATCAAGACCTGTCTGC
TAATCCAACCCGAGAGATCATGGCGATCCAAACCCGTTTTGCCTCGGGCACATCTTTATC
CGATTTGAAACCAAAACCAAGTGCAACTTCCATCTCCATACCCATGCAAAATGTCATGAA
CAAGCCTGTCACGGAACAGGACTCACTGTTCCATATATGCGCAAACATCCGGAAAAGACT
GGAGGTGTTACCTCAACTCAAACCTTTTTTACAATTGGCCTACCAATCGAGCGAGGTTTT
GAGTGAAAGGCAATCTCTTTTGCTATCCCAAAAGCAGCATCAGGAACTGCTCAAGTCCAA
TGGCGCTAACCGGGACAGTAGCGACTTGGCACCAACTTTAAGGTCTAGCTCTATCTCCAC
AGCTACCAGTCTCATGTCGATGGAAGGTATATCATACACGAATTCGAATCCCTCGGCCAC
CCCAAATATGGAGGACACTTTACTGACTTTTAGTATGGGTATTTTGCCCATTACCATGGA
TTGCGACCCTGTGACACAACTATCACAGCTGTTTCAACAAGGTGCGCCCCTCTGTATACT
TTTCAACTCTGTGAAGCCGCAATTTAAATTACCGGTAATAGCATCTGACGATTTGAAAGT
CTGTAAAAAATCCATTTATGACTTTATATTGGGCTGCAAGAAACACTTTGCATTTAACGA
TGAGGAGCTTTTCACTATATCCGACGTTTTTGCCAACTCTACTTCCCAGCTGGTCAAAGT
GCTAGAAGTAGTAGAAACGCTAATGAATTCCAGCCCTACTATTTTCCCCTCTAAGAGTAA
GACACAGCAAATCATGAACGCAGAAAACCAACACCGACATCAGCCTCAGCAGTCTTCGAA
GAAGCATAACGAGTATGTTAAAATTATCAAGGAATTCGTTGCAACGGAAAGAAAATATGT
TCACGATTTGGAAATTTTGGATAAATATAGACAGCAGTTATTAGACAGCAATCTAATAAC
GTCTGAAGAGTTGTACATGTTGTTCCCTAATTTGGGTGATGCTATAGATTTTCAAAGAAG
ATTTCTAATATCCTTGGAAATAAATGCTTTAGTAGAACCTTCCAAGCAAAGAATCGGGGC
TCTTTTCATGCATTCCAAACATTTTTTTAAGTTGTATGAGCCTTGGTCTATTGGCCAAAA
TGCAGCCATCGAATTTCTCTCTTCAACTTTGCACAAGATGAGGGTTGATGAATCGCAGCG
GTTCATAATTAACAATAAACTGGAATTGCAATCCTTCCTTTATAAACCCGTGCAAAGGCT
TTGTAGATATCCCCTGTTGGTCAAAGAATTGCTTGCTGAATCGAGTGACGATAATAATAC
GAAAGAACTTGAAGCTGCTTTAGATATTTCTAAAAATATTGCGAGAAGTATCAACGAAAA
TCAAAGAAGAACAGAAAATCATCAAGTGGTGAAGAAACTTTATGGTAGAGTGGTCAACTG
GAAGGGTTATAGAATTTCCAAGTTCGGTGAGTTATTATATTTCGATAAAGTGTTCATTTC
AACAACAAATAGCTCCTCGGAACCTGAAAGAGAATTTGAGGTTTATCTTTTTGAAAAAAT
CATCATCCTTTTTTCAGAGGTAGTGACTAAGAAATCTGCATCATCACTAATCCTTAAGAA
GAAATCCTCAACCTCAGCATCAATCTCCGCCTCGAACATAACGGACAACAATGGCAGCCC
TCACCACAGTTACCATAAGAGGCATAGCAATAGTAGTAGCAGTAATAATATCCATTTATC
TTCGTCTTCAGCAGCGGCGATAATACATTCCAGTACCAATAGTAGTGACAACAATTCCAA
CAATTCATCATCATCCTCATTATTCAAGCTGTCCGCTAACGAACCTAAGCTGGATCTAAG
AGGTCGAATTATGATAATGAATCTGAATCAAATCATACCGCAAAACAACCGGTCATTAAA
TATAACATGGGAATCCATAAAAGAGCAAGGTAATTTCCTTTTGAAATTCAAAAATGAGGA
AACAAGAGATAATTGGTCATCGTGTTTACAACAGTTGATTCATGATCTGAAAAATGAGCA
GTTTAAGGCAAGACATCACTCTTCAACATCGACGACTTCATCGACAGCCAAATCATCTTC
AATGATGTCACCCACCACAACTATGAATACACCGAATCATCACAACAGCCGCCAGACACA
CGATAGTATGGCTTCTTTCTCAAGTTCTCATATGAAAAGGGTTTCGGATGTCCTGCCTAA
ACGGAGGACCACTTCATCAAGTTTCGAAAGTGAAATTAAATCCATTTCAGAAAATTTCAA
GAACTCTATTCCAGAATCTTCCATACTCTTCAGGATATCATATAATAACAACTCTAATAA
TACCTCTAGTAGCGAGATCTTCACACTTTTGGTAGAAAAAGTTTGGAATTTTGACGACTT
GATAATGGCGATCAATTCTAAAATTTCGAATACACATAATAACAACATTTCACCAATCAC
CAAGATCAAATATCAGGACGAAGATGGGGATTTTGTTGTGTTAGGTAGCGATGAAGATTG
GAATGTTGCTAAAGAAATGTTGGCGGAAAACAATGAGAAATTCTTGAACATTCGTCTGTA
TTGATAAATAAAACTAGTATACAGCAAATACTAAATAATTCAAGAAAAAAACATTAGATA
GAGAGGGGCAGATGTTCAAGCTATACCCATTATATTGATCCACACTTAGTATTAAGATAC
GTCTGTGAAGGATGAAAAAAAATGTATAATGTGACTAGAGGAAGTAAGGAGAAAAAACGA
TAGTAATCGTATTTTAGGTTGTGCGTTTTTATAATTTTTTTTTTTTTGTAATTCTATGCA
AATGTAATATAAGTATATTTAAAGAAATAATGAGTCCTGTGAAAACAAAAAGAAAAAAAG
ATCATTAATGTATGTTAACGTATTTGCTTTGCAAATTTTAATTTATTTGTTGTTAAATGC
ATTTTTTTTTTGTCGTTTCAGCGAGTTTTCTTGAGGTTGCTACTATCATTAAAATCACAA
TCCACAGAGGAAGTTGATCTCTTTTTCAGTTGGGTGGGGGCAGAGCATGGGTGAGCAGTG
GCCATGGGTCTAACAGGAAATAATCTTTTTGAACGCACAGATAAATTTTGTAATAATTTT
CTATTTGACATTAGAGATGGGGTGGTGGGAGTTAGTGGGCTTGGCCAAAAGATGCTTGAA
TTTTGTGGGATGCTCAGTGACCTTTTAAAAGAATTTTGGGTAGAAGAGAACGAACCTGAA
TGTGAATGGTGTGATGCAGAGTCTGGGGTCGTCATTGAACTTGAAGTCTTGTAAGGGGAA
TTGAATGGAGATGGAGAGGATGAAGATGAGGTTGGAGTGAAGGCAAATGGTGGAGAAATG
CTATCTTTGGTCAACCTTCTTAAATGAGTGTGATCCGAGAAATAGTCTGTGGCCGCAGAT
GAAACCGTAGCGCTCTTTGGAGTAGTAGCATTTGAGTAAACACAAGTCAATGAATCGCTG
TCAAAGGACTGAGCAAAGATAGTATTGTACATGGTTTCCAATTCTTGTGAACGGTAGAAT
TCTTCCAGTTTCAATTGAATACAATAGTTTTGTAATGCGTCTAAGAGAGATTTTGCTAAA
GATGTCTTATTGCTATTCAAATATTTTGATTTGAAACTGGAGGGGAAAGAATTTTGGTCC
ATTGCTATATCCAATAAAGTATTAGAGATTTCTGACAATTTAATATCTAGGTCTTGGCAG
TTTTCCTCCAAAGCCAGATTGATATTTTCCCAAAGGTTTGAATTATAGTAGTTCAAAGAT
AATTTGATGAGGTTAATTGCACCCAGCGCAATTAGTGAACGATCATATTTAAATGATAAT
TCGAGATTGAAGGAAGCTAACTCGCACAACATAATGGCACCCAATTTGATCTCGTTGATG
TTCAAAGAGGGGCCTTGAGAAGAGGACGATTTATTAATAGCAGTACCAGCAGCGTTATTT
AATAAGGCCAGTTTCTGTTGAATGAAAGCTTCCAAAGGGGCAGAAAGGACAACGCCAGGC
GATAACGGGGACGTAGATTGGAACAAGAAGATGTCGATGTAGGAGTCGAATGTTGCCGAC
TGACAGATGGACCAATCGAGTGATTTGAAAAGATGCATTTCCATAGTCGTGAATTGCTTT
ATAGAATATTGATTGCAACACAAGTTTTGCAAGACTTTCAAAGTGGCCATTCTATTCTTG
GAGTCCCAAAATTTGGACGAAATCCAAAGCGCGGTCAAGGACAAGAGCTGGTAGTTGTAA
CTCTTGATAATGAACCGCGAGGAATACTTGTCCAAGATAGTGAAAGTAAGGAACAAAGTC
GAGGTCGATAGATTGAGTCTTGTGTGACAGTACATGATGAAGTCAAAGATCAAGAAACGC
ATCTTCGGATTAACTTGTGGCTGAGAGTTGAAGTTAGTCAGGTTGTACAGCGGCCTTTCT
GTGTGGGAAAGACGGAAATAGTGGTCCAATTGATCATTATTGTATTCGCTGATCGCTGAG
TGATGTGCTTGCAATTCTCTTTTAACGAGATTAGGGTTTTTAGACTTTGCACTAGCAATG
GCCCGCCTCTTTTGCAAGAGCAAGGGCAAATTAGGACATGAGGCAGCGCTGACAGAGGCG
GCAGTGGCGGTGGAAGTGCCACTAGCGGTAGCATACCTTGCATTAGCGTATCTAATTATG
GTATCCTTCAATATGGCCATCGTACAGAAAGCGTATCAAATCAGTGTCTTGAACGAGAGT
AAAAGGGAGATGCAATGGAATGTAAGAAATGCTATGGGTCAGAAAAGAAATGCAGAGGAG
TTAAACCGAATGAGGAAATGCAATGGATACGTTAAATTGGAGATGTGAGATTGCGACTGG
GACTCGGATGGATGCTTGCTTTTGGATGCTAGTACAGAGAAAAAAGAGGGAGAAAAGAAA
AGAGAAATAGAAAAAGGTTGGTTTAAGTCGGCAGAGGAGACTACTCGGGCAATTCGTTTC
CTAATGGGTATAGTCCTCTTTCCTCAGAAATCCATTTGACTGGCAGACTCAGTAGTAGAA
GAAAAAATCAAGAAAGAAATTGTGTGAAAGTATACTACACAAGAAAATGTTTAAGAAGAA
GATTAAAAGCTCGAGGAAAGTACAGATATACAAATTATAAATAGGTAGGAGGAAGAAAAA
AAAAAGATGAGGGCAAAAACCCAAGGCCAAATATGGAAATGTGGCAGAGGGACACACTAA
TCCGATAGTAAATTTATGTAACTTGATCATTACAGTGAGAGCAGGCTTGGTAATTTCTTT
TTCTTGCCTGATAATTTTTCACTTTTTCTTTTTTTTTTTCTTGAAAGTTCACAATTTAGG
GTTTGAGCACAGCGTTTGGTTGCGACACTTCCCCAGAAGGAAAACCGGCCTCTTTGGCTG
GGGAGGGAAGAAGGGGGAGGAGAGCTCAGAAAGCCCTATCGCGATATGAGGGACCGATCT
GTATCAGCATACTTTCGGTATCATCACGGTCGCAGGATAGAGATAGTGAATGAGTTAGCT
GTTTTACAGGCCAAGCGTTCAAACGAGACGAATGGCGACATTTGCCCGTCAAGAAAACCC
GCCGAGTTTTTTCCTAAACGGGTAAAACAGCCATGCACCGCAGCACGTCGACGAGGTGAT
ATTTCCAATTTGGGAAATTTCCCAAATCAGTAATGTAGCCTCTACGGGTGTCTCTGTCAG
CCCCGTGGTCGCCAGCACAGAATGTATCGTACCCCTGAAGGTAGTTTTTTACCGCCGTGG
CACACGATAAAGGTGCACCTTGTGATAATAAGGTGGAAAAATATATATGAAAAAGTGAAA
TTGATTGTGGCTGCACTAGGACATCATTATTTCTTACTTGGCTATTTACACGTACTTACG
CTGGCTGTATATCATTTAAGGGGCGGAGGACGAAGAGGACGGACCCGAGATCATCCGGTC
CAAGAAACGGGTCATCCGGTCCTTAGCATTGTCTAGACTATCTAGGGCAGGACGGACATC
CACGTGGAAAGTAGGCATTCCGTTTTCGTCGTCGGGCCCTCCGTAGAAATCCAAGACGTA
TCTAACTTCCTTGAAGGTTGGAGGTTGTTGTTCCGCTTTGCGCTCGCCTCGGAGTACAAT
CCAGTCGTGCCTGTCGAATGGTAGTTCTTGGCTAAAATGGGACGGAAACAGTAGGCCGCA
CAGGTGCATCCAGCGAGCACGAGGGCTCAATACGCCCGGTTTCCCCATGAATTTCAGCAA
CTTAGGCTGCACGTGGCTTTCATCTGTGTGCGGTTTTTCCCATTCGAGCACTTCCTGCCA
GCACCCTTCATTTAGAAAGTTGTGGACCTGCACCATGGACTCCACTGCATCTTCGGCGAC
TTCGCCGCTACCGCCAATCTTGCCCTTTCTAACCATAGCATTGTACATCTGTTGTGGAGA
AGGATACTCCCAGAACTCGTTACTGTCTGGACTCTTGGGGATGCTGGAGATGGTCCGATC
AACGGGCAAGTCCATCTTTTGGCCAGGCTGTTTGGATGCTGCCAACTCCGGCATATTGTT
CAGCGGGTTTATTCTATCGTTATCTCCCTGCATAACGGGGCACTCAGAGGATGGTGGCGA
CGACGACGACGACTCGTGCATGACTGGGCACCCTGACATGGATGATACTGCTGCCCCACC
AATATCTTTGCCCGTAGTTTTTTGATCTGCCCAAAACCAACCCATTTTTTGTAGTTTCTG
TTGTATTTGCTCTGCTTTATTCGTGCTACTCGTATGTGTATGCTATCTTATTAGCTGCCT
ATTTCATTTCTCTTAGTATTCGCATTTAAAGCTGAGAAATTTTTTGATAATCATTTCCCG
ATGAAAAGAAAAAAGGGAAAAAGTCGATAAAAAGAGGTAAGCGAAAAGAAAAAGAAAAAA
TAGAAAATTTGGGTGGGGGGGGCGGAAGATCCCACGCCGCGCAAGAGATATTTCAATATT
ACTACTACATAGTATATGCGGCGCTACCATACGTACAACTTTTTTTTCTTTTTTTTTTTT
TTTGCCTTCTAAATTTGTAATTCGGTCACACTTTTGTCGCAGTGTTGCAAACGTCTTGAA
AGAATTGTAGGTGTTGTAAACCACAACTTGCTCCCTTGAAAGCGTTGCTGATTATTTCCT
TTGAACCTGTTGCATTGTTGTATTGTTGTATTGCTGCTGATGTTTTAGGCACTTAGTATT
AGATATTCCTAAGCCTCCCTCACCATAAATTACCTTTATTACTTGCATGACTATTATTAG
CAGAGCATGTAGTATGGGACTCAAGACCGATATGATACACACCAAAGACGTAGGCACCGG
CGATTAAATCAAAGGCTCCGATAGCCGAAAAGTGAGAAGAAAAAAAAAGGAAAAAAAGGA
ATTGTCCTAATGAGCGGTGTGGCCGACTTGCCATAATATCAGTTAGGGCTACTATCAATG
TTTTATCTACGTTGGAGTAAGATCGTTTATCACTTCCATATTTGGACCAAATGAAAAGTT
CAATCGGCCAAGTATTTCATGGATGGAATGACGTTTGGTAAGGAAGTGCTTTTTCTTTTT
CCACATATTTTCCCTTTCTCTCGGGGAAATTTTGTTTCTAAACATAAAAAATAAAGCAAC
AGCAAAAAAGAGGGTCTGTCCAGCGAATAAGAAGAAAACCTCCTTTTCGGCTTTTGAAGA
TAGGTTGCAGTTGTCTGCGGGCACAAAATGGGCAATTTTTTTAATACTTTTTACGTATGA
GACAAGATTTTTTTCGCCAATTATATCGCATGAAGAATAACCAGAGTTTTTCTCCGAACG
TTAAGGGAGTTGAAGTAAAAATAAAGAAAGGACCAAATGAGAATGGGTATGCTTGGTCTT
AGTCTTCGAATCAAATTCTGCTTCCCTGTTCATGGCAACGTCACCTCAATTATTTGGAAA
GGGGGGGTTTTCCGACTTTATTTGAGATGACTTGAGATGTGTGTCAATGCTAGTATTTTG
GAGATTAATCTCAGTACAAAACAATATTAAAAAGAGGTGAATTATTTTTCCCCCCTTATT
TTTTTTTTGTTAGAATTGATCCAAATGTAAATAAACAATCACAAGGAAAAAAAAAAAAAA
AAAAAAAATAGCCGCCATGACCCCGGATCGTCGGTTGTGATACGGTCAGGGTAGCGCCCT
GGTCAAACTTCAGAACTAAAAAAATAATAAGGAAGAAAAAAATAGCTAATTTTTCCGGCA
GAAAGATTTTCGCTACCCGAAAGTTTTTCCGGCAAGCTAAATGGAAAAAGGAAAGATTAT
TGAAAGAGAAAGAAAGAAAAAAAAAAAATGTACACCCAGACATCGGGCTTCCACAATTTC
GGCTCTATTGTTTTCCATCTCTCGCAACGGCGGGATTCCTCTATGGCGTGTGATGTCTGT
ATCTGTTACTTAATCCAGAAACTGGCACTTGACCCAACTCTGCCACGTGGGTCGTTTTGC
CATCGACAGATTGGGAGATTTTCATAGTAGAATTCAGCATGATAGCTACGTAAATGTGTT
CCGCACCGTCACAAAGTGTTTTCTACTGTTCTTTCTTCTTTCGTTCATTCAGTTGAGTTG
AGTGAGTGCTTTGTTCAATGGATCTTAGCTAAAATGCATATTTTTTCTCTTGGTAAATGA
ATGCTTGTGATGTCTTCCAAGTGATTTCCTTTCCTTCCCATATGATGCTAGGTACCTTTA
GTGTCTTCCTAAAAAAAAAAAAAGGCTCGCCATCAAAACGATATTCGTTGGCTTTTTTTT
CTGAATTATAAATACTCTTTGGTAACTTTTCATTTCCAAGAACCTCTTTTTTCCAGTTAT
ATCATGGTCCCCTTTCAAAGTTATTCTCTACTCTTTTTCATATTCATTCTTTTTCATCCT
TTGGTTTTTTATTCTTAACTTGTTTATTATTCTCTCTTGTTTCTATTTACAAGACACCAA
TCAAAACAAATAAAACATCATCACAATGTCTAGATTAGAAAGATTGACCTCATTAAACGT
TGTTGCTGGTTCTGACTTGAGAAGAACCTCCATCATTGGTACCATCGGTCCAAAGACCAA
CAACCCAGAAACCTTGGTTGCTTTGAGAAAGGCTGGTTTGAACATTGTCCGTATGAACTT
CTCTCACGGTTCTTACGAATACCACAAGTCTGTCATTGACAACGCCAGAAAGTCCGAAGA
ATTGTACCCAGGTAGACCATTGGCCATTGCTTTGGACACCAAGGGTCCAGAAATCAGAAC
TGGTACCACCACCAACGATGTTGACTACCCAATCCCACCAAACCACGAAATGATCTTCAC
CACCGATGACAAGTACGCTAAGGCTTGTGACGACAAGATCATGTACGTTGACTACAAGAA
CATCACCAAGGTCATCTCCGCTGGTAGAATCATCTACGTTGATGATGGTGTTTTGTCTTT
CCAAGTTTTGGAAGTCGTTGACGACAAGACTTTGAAGGTCAAGGCTTTGAACGCCGGTAA
GATCTGTTCCCACAAGGGTGTCAACTTACCAGGTACCGATGTCGATTTGCCAGCTTTGTC
TGAAAAGGACAAGGAAGATTTGAGATTCGGTGTCAAGAACGGTGTCCACATGGTCTTCGC
TTCTTTCATCAGAACCGCCAACGATGTTTTGACCATCAGAGAAGTCTTGGGTGAACAAGG
TAAGGACGTCAAGATCATTGTCAAGATTGAAAACCAACAAGGTGTTAACAACTTCGACGA
AATCTTGAAGGTCACTGACGGTGTTATGGTTGCCAGAGGTGACTTGGGTATTGAAATCCC
AGCCCCAGAAGTCTTGGCTGTCCAAAAGAAATTGATTGCTAAGTCTAACTTGGCTGGTAA
GCCAGTTATCTGTGCTACCCAAATGTTGGAATCCATGACTTACAACCCAAGACCAACCAG
AGCTGAAGTTTCCGATGTCGGTAACGCTATCTTGGATGGTGCTGACTGTGTTATGTTGTC
TGGTGAAACCGCCAAGGGTAACTACCCAATCAACGCCGTTACCACTATGGCTGAAACCGC
TGTCATTGCTGAACAAGCTATCGCTTACTTGCCAAACTACGATGACATGAGAAACTGTAC
TCCAAAGCCAACCTCCACCACCGAAACCGTCGCTGCCTCCGCTGTCGCTGCTGTTTTCGA
ACAAAAGGCCAAGGCTATCATTGTCTTGTCCACTTCCGGTACCACCCCAAGATTGGTTTC
CAAGTACAGACCAAACTGTCCAATCATCTTGGTTACCAGATGCCCAAGAGCTGCTAGATT
CTCTCACTTGTACAGAGGTGTCTTCCCATTCGTTTTCGAAAAGGAACCTGTCTCTGACTG
GACTGATGATGTTGAAGCCCGTATCAACTTCGGTATTGAAAAGGCTAAGGAATTCGGTAT
CTTGAAGAAGGGTGACACTTACGTTTCCATCCAAGGTTTCAAGGCCGGTGCTGGTCACTC
CAACACTTTGCAAGTCTCTACCGTTTAAAAAAAGAATCATGATTGAATGAAGATATTATT
TTTTTGAATTATATTTTTTAAATTTTATATAAAGACATGGTTTTTCTTTTCAACTCAAAT
AAAGATTTATAAGTTACTTAAATAACATACATTTTATAAGGTATTCTATAAAAAGAGTAT
TATGTTATTGTTAACCTTTTTGTCTCCAATTGTCGTCATAACGATGAGGTGTTGCATTTT
TGGAAACGAGATTGACATAGAGTCAAAATTTGCTAAATTTGATCCCTCCCATCGCAAGAT
AATCTTCCCTCAAGGTTATCATGATTATCAGGATGGCGAAAGGATACGCTAAAAATTCAA
TAAAAAATTCAATATAATTTTCGTTTCCCAAGAACTAACTTGGAAGGTTATACATGGGTA
CATAAATGCAGATGCCAGTGAACTATGTTCAGCTTCTGGCCTTCGTTTGGTGGTTTAATC
TATTTTTTATAAAAAATGACGCGGGCAGATTCAATTAGTGTCCTAAATTTATTCGCGTTT
CAAGATTTCAAAGGATTGATCCTCTTATCAGAAACGATAAGTGCTACTCCGTCCTATTCT
TCTAGCCATCTAGTACGTATTCTTTTCATAACATAATCCCTTATTTACAGAATGTGTTTC
GAAGAAAAATTAATTAGATGGGAAGAAAACTGAAGTGGCTTATATAATCAGTGACATAGT
GCCAATAATTACGCAAAAAGCAAAGGAAATAACACTGCTATGGATATGGAAATCGAAGAT
TCAAGCCCCATAGATGACCTGAAGTTACAAAAACTGGATACCAATGTTTATTTTGGACCC
TGTGAGATATTGACACAACCTATTCTTTTGCAATATGAAAATATTAAGTTCATCATTGGT
GTCAATCTAAGTACTGAAAAGATAGCGTCGTTTTATACCCAGTATTTCAGGAACTCTAAT
TCGGTAGTCGTGAATCTTTGCTCACCAACTACAGCAGCAGTAGCAACAAAGAAGGCCGCA
ATTGATTTGTATATACGAAACAATACAATACTACTACAGAAATTCGTTGGACAGTACTTG
CAGATGGGCAAAAAGATAAAAACATCTTTAACACAGGCACAAACCGATACAATCCAATCA
CTGCCCCAGTTTTGTAATTCGAATGTCCTCAGTGGTGAGCCCTTGGTACAGTACCAGGCA
TTCAACGATCTGTTGGCACTCTTTAAGTCATTTAGTCATTTTGGAAATATCTTGGTTATA
TCATCACATTCCTATGATTGCGCACTTCTCAAATTTCTTATTTCCAGGGTGATGACCTAC
TATCCACTAGTGACCATCCAGGATTCTTTGCAATATATGAAAGCAACCCTGAACATATCC
ATCAGTACATCCGATGAGTTCGATATTCTGAATGATAAAGAACTGTGGGAGTTTGGCCAA
ACCCAGGAAATTCTAAAACGTAGGCAGACGAGCTCAGTCAAGAGGAGATGTGTCAATTTA
CCAGAAAACTCTACGATCGATAACAGAATGCTTATGGGTACCACAAAGCGAGGTCGCTTT
TGAAGAGCCCTCGGTAGCATAACATTTTTAATTATTACGACTGTTTTTTTTATTCATTAT
GTAGAGATAATTAAATGTTATAGATGCTCTATACTCAAACGGTGGAAGAAAAACAGCGAA
AAAAAATAACCGATACCCCCTTTTCGAATACAAATGCTTGTATATTCAATTATGAATTAT
TTTTTTTTTTTTTCATTTCTTATATTATTTTTTGTTCGAGAATCACTTTTTCAAGATGGT
AACAACATCTTCGTCTTCCAAAATGTGACTCAACCCCACGTATTGAGGTTGATGTTTGAC
ACTGCTACCGTAAACCAGAGCATTTCTAAAGTCGTCCACTAAAGATTTATGAATTTGGTT
ACAAAAATCCTTGACACTGCAACGGTCTGATCTTAGCACCACAGGGTCGGTAAAATCTGG
TATTTGGCCCTTTGGTTTAGTGTAAATACGGACTAGATTTAGTCTATCCCACATGACTTG
CAACAGCTCGTCCAAGTTCCAATCTTGACCAGACGAAATAGGCACGGCATTAGGAATTCG
GTAAAGTAATTCCAATTCCTCTATTGACAGAGAATCAATCTTGTTTAACACATAGATGGC
AGGCATGTATCTTCTTGACGAAGCTTCCAAAACATCAATCAAATCATCCACAGTGGCATC
ACACCTGAAGGCAATCTCAGCGCTATTTATTCTGTACTCGCTCATAACGGCTCTGATTTC
GTCATTCCCCAGATGGGTCAATGGGACTGTGTTTGTGATGGAAATACCACCTTTCTCTTT
TTTTTTGATCAAGATATCTGGCGGAGTTTTATTCAGACGAATCCCCACACCTTCCAGTTC
CTTCTCAATGATTTGCTTATGATGCAAGGGTTTGTTCACATCTAGGATGATAAATAACAG
GTTACAGGTTCTTGCCACGGCAATAACTTGCTTACCTCTACCTCTACCATCCTTAGCACC
ATCGATAATACCAGGTAAATCCAACATTTGGATCTTGGCACCTTTATAACGAATGACACC
GGGGACGGTAACCAGGGTGGTAAACTCGTACTCAGCTGCTTCAGACTCAGTACCAGTCAA
CTTGGACAGTAATGTAGATTTCCCCACCGACGGGAACCCGACAAACCCCACACTGGCCAC
ACCAGTTCTAGCCACATCAAAACCAATACCAGCACCACCACCGCTGCCGGATGAAGCACT
GGTCAACAATTCTCTTCTCAGTTTGGCCAGCTTGGCCTTCAGTTGACCCAAATGGAAAGA
TGTGGCCTTGTTCTTTTGGGTACGGGCCATTTCATCTTCGATAGCTTTGATTTTTTCAAC
TGTAGTAGACATTTTGCTCAATCAACAACTCTACGCTTGCACCTACTGCATCTAGCTTCA
AACACTTCCTATCATTGCGCCCTCATCACACCGTAATATCCCATCTTAAAAGTGGAAAAC
TCTTATAGCTCATCGATGAAAAAAACGGGCCCTCGTCGCTTGTGATGTGAAAAAATTTTT
CAAGCTTTAAGCCCATTGAAAGCAAGAGATCTTGCACTAGAATAAGTGGCAAAGGTGAAC
TTTGAGGGGATAAGAAGGGCAATCAGGAACATCAGATAAGTGAAAGATGGCGAAAAAGAG
TAAAAAGAACCAACAGAACTACTGGGATGAGGAATTCGAAGAAGACGCCGCCCAGAACGA
AGAAATCAGTGCCACGCCAACTCCAAATCCAGAAAGCAGCGCAGGTGCAGATGACACTTC
CAGAGAAGCAAGTGCAAGTGCTGAAGGTGCTGAGGCCATTGAAGGCGACTTCATGTCTAC
TTTGAAGCAATCGAAGAAGAAGCAAGAAAAGAAGGTTATTGAAGAGAAGAAGGATGGTAA
GCCTATACTAAAGTCCAAGAAGGAAAAGGAGAAGGAAAAAAAGGAAAAGGAGAAGCAGAA
GAAGAAAGAACAAGCTGCCAGGAAGAAGGCCCAACAGCAAGCTCAAAAGGAGAAGAACAA
GGAGTTGAACAAGCAAAATGTTGAAAAAGCTGCTGCTGAGAAGGCTGCTGCTGAGAAATC
CCAAAAATCTAAAGGTGAAAGTGATAAACCAAGTGCTAGTGCTAAGAAGCCAGCCAAGAA
AGTACCTGCCGGTTTGGCTGCTTTGAGACGTCAATTAGAATTGAAGAAACAACTTGAAGA
ACAAGAAAAGTTGGAAAGAGAGGAAGAAGAAAGATTGGAGAAAGAAGAGGAGGAAAGATT
GGCCAACGAAGAAAAAATGAAGGAAGAAGCTAAAGCAGCTAAAAAGGAAAAGGAGAAGGC
AAAGCGTGAAAAACGAAAGGCTGAAGGTAAGCTATTGACCAGAAAGCAAAAAGAAGAAAA
GAAATTATTGGAAAGAAGACGTGCCGCTTTATTGTCTTCCGGTAACGTCAAAGTTGCCGG
TCTGGCCAAGAAGGATGGAGAAGAAAACAAACCAAAGAAGGTTGTTTACAGCAAGAAGAA
GAAGAGAACAACCCAGGAAAACGCCTCCGAAGCCATTAAATCTGACTCTAAGAAAGACTC
GGAAGTTGTACCTGATGACGAACTCAAAGAATCCGAAGATGTTTTGATTGATGATTGGGA
AAATTTGGCTCTTGGTGATGATGACGAGGAGGGAACCAACGAAGAAACGCAAGAATCCAC
CGCAAGCCATGAAAATGAAGACCAAAATCAAGGCGAAGAAGAAGAAGAAGGAGAAGAAGA
AGAAGAAGAAGAAGAAGAAAGAGCACATGTGCATGAAGTTGCCAAAAGCACACCAGCAGC
TACACCAGCAGCTACTCCAACTCCATCCAGCGCTTCTCCAAACAAAAAAGATCTTCGTTC
CCCAATTTGTTGTATTTTGGGTCATGTCGATACCGGTAAGACTAAATTGTTAGACAAAAT
CAGACAAACCAACGTTCAAGGTGGTGAAGCTGGTGGCATCACCCAACAGATTGGTGCCAC
TTATTTCCCCATCGACGCTATTAAGGCAAAAACTAAAGTTATGGCTGAATATGAAAAACA
AACTTTTGATGTCCCAGGTCTTTTGGTTATTGATACCCCAGGTCACGAATCCTTCTCTAA
CTTACGTTCAAGAGGTTCTTCATTGTGTAACATCGCAATTTTGGTTATTGACATTATGCA
TGGTTTGGAACAACAGACTATTGAATCTATCAAACTGTTAAGAGATAGAAAGGCTCCATT
TGTCGTTGCCCTAAACAAAATTGATAGATTATATGACTGGAAAGCCATTCCAAACAATTC
ATTCAGAGACTCCTTTGCAAAGCAATCAAGAGCTGTTCAAGAGGAATTTCAATCTAGGTA
TTCTAAGATTCAATTGGAATTAGCTGAACAAGGTTTGAATTCGGAATTGTATTTCCAAAA
CAAAAATATGTCTAAGTATGTCTCCATTGTCCCAACATCTGCCGTCACCGGTGAGGGTGT
TCCAGATTTATTGTGGTTGCTATTAGAATTGACCCAAAAGAGGATGTCCAAACAATTGAT
GTACTTGTCTCACGTGGAAGCAACCATTTTGGAAGTGAAAGTCGTAGAAGGTTTTGGTAC
CACAATTGATGTTATCTTGTCCAACGGTTACTTGAGAGAAGGTGACCGTATTGTACTGTG
TGGTATGAATGGTCCAATTGTAACGAATATCAGAGCATTACTAACACCACAACCATTACG
TGAACTACGTTTGAAATCTGAATATGTCCACCACAAAGAAGTCAAGGCTGCTTTAGGTGT
CAAGATTGCCGCTAATGATTTAGAAAAAGCCGTTTCTGGTTCTAGGCTGCTAGTTGTCGG
TCCTGAAGATGACGAAGATGAATTGATGGACGACGTTATGGATGATTTGACTGGTTTGTT
GGACTCCGTTGACACAACTGGTAAAGGTGTTGTGGTCCAAGCATCCACCTTGGGTTCTTT
GGAAGCTTTGTTGGATTTCTTGAAAGACATGAAAATCCCTGTGATGTCTATCGGGTTAGG
TCCAGTGTACAAGCGTGATGTTATGAAAGCCTCCACTATGTTGGAAAAGGCTCCAGAGTA
TGCCGTGATGTTATGTTTTGATGTTAAAGTGGATAAGGAAGCTGAACAATACGCTGAACA
AGAAGGAATTAAGATCTTTAATGCAGACGTCATCTATCATTTATTTGATTCATTTACAGC
ATACCAAGAAAAGTTATTGGAAGAACGTCGTAAAGATTTCCTAGATTACGCTATTTTCCC
ATGTGTCTTACAAACCTTACAAATTATTAACAAACGTGGTCCAATGATTATTGGTGTAGA
CGTTCTGGAAGGTACTCTACGTGTGGGAACTCCTATTTGCGCTGTGAAAACCGACCCTAC
TACAAAGGAAAGACAAACTTTGATATTAGGTAAAGTCATCTCTTTAGAAATCAACCATCA
ACCTGTCCAAGAAGTAAAGAAGGGCCAAACCGCTGCTGGTGTTGCCGTCCGTCTAGAAGA
TCCCTCCGGTCAACAACCTATCTGGGGTCGTCATGTTGACGAGAATGATACATTATACTC
CTTGGTTTCAAGAAGATCTATTGACACTTTGAAGGATAAAGCTTTTAGGGACCAAGTTGC
TAGATCCGATTGGCTGCTATTGAAGAAGCTGAAGGTCGTTTTCGGCATCGAATGAGCATG
GCATACGCTGACTTGTCAACCCAATCACATTCTACAAAATTTAATGAATTAAATAGGTAA
TTGTATATAAAAATGTGAACCTTTGTGTATTAGTTTCAATTCTATCTTACTTTTCATTGC
CATTTTACTTCTTTCACCTTGCTGTCTTTCAACCTTGGAAATTTTTATAGTACGCGTAAA
CAAAAAAGGTAAATAAGAGGCATTGAATATAAGTTGGCATTTATTAGGAAGTTGAGTAAT
AACACGTTGAAACTGGGTTAAGACGATCAAAACAACCATGTCTGCTCCCACTATGAGATC
CACCTCAATATTGACAGAGCATTTGGGATATCCGCCCATCTCGCTTGTTGATGATATCAT
TAATGCTGTAAATGAAATTATGTACAAGTGCACTGCTGCCATGGAAAAATATCTGCTATC
CAAGAGCAAAATCGGCGAGGAAGATTATGGAGAAGAGATCAAAAGTGGAGTTGCTAAGTT
GGAATCACTTTTGGAAAACTCCGTGGATAAGAATTTTGACAAACTAGAACTATATGTTTT
GAGGAACGTCCTTCGAATCCCTGAAGAGTATTTGGACGCCAATGTTTTTAGATTGGAGAA
CCAAAAGGATCTGGTCATTGTAGATGAGAATGAGTTGAAGAAAAGTGAGGAGAAACTTCG
AGAGAAAGTGAACGACGTGGAGTTAGCGTTCAAAAAGAATGAAATGCTATTGAAAAGAGT
TACAAAAGTGAAAAGACTGTTGTTTACGATAAGAGGATTCAAACAAAAGCTAAACGAGTT
ACTGAAATGCAAAGACGATGTACAATTGCAGAAAATTTTGGAGTCGTTAAAACCTATAGA
TGACACAATGACTCTACTGACTGATTCATTACGTAAACTATATGTTGATAGTGAAAGTAC
CAGTTCAACAGAGGAGGTAGAGGCACTACTGCAGAGATTGAAGACCAACGGGAAGCAAAA
TAATAAGGATTTCAGAACACGATATATCGATATAAGGACGAATAATGTCCTACGAAAATT
GGGGCTACTAGGTGATAAAGAGGACGAAAAACAGTCTGCCAAGCCGGATGCGAGGACGCA
AGCAGGGGATATAGTTAGTATAGATATTGAAGAGCCTCAATTGGATTTACTTGATGATGT
GTTATAATATAAAGTGGGAAAAAGTATGTGCTATGATATGATGTATGTATTCACGAATGT
ATTATGTAGAAAAATGCTAAAAAATTGGATAAAAGAAAACCATGTTTAAAATGCATACCA
CCATGTGTATTATAAGTACTTCGTAAAATTCGAATCCTGTAGCCAGCCAACCTTCTCGAA
AGCTTGGAATAGTCTTGATGCTTTATTAACGTCGATCCTACAGGCTTTTTGGGCGTCGGT
CCTTCTAAACGGCAACCCTTTCTTTAGTCTATAAACTTTTTCCAAAAATAACCTTCTCTT
AGAATCCAGATACAAATCACAAGGTAACCTTAGAGTTTGAGCGAGAACTAGTTCAGCAGG
GTGTAGCTCGTTCCTCAGCGGGTCTGTGGACAGGTCCATTGGAGACCCCTTCCACTCGAT
CTTGAGTGACTTGTTACTGTCTGTAGGAAGCGTAGATAAGGGCGGAGAGTAATCTGGTAA
TTTTTTCCATGAGACGTTTGGTATATATTGAGGAGCATCATGAATCGCCTCAATGGATGC
AATGTTAGTGTGAGGAGTGGATGCAGAGGGTGAGAACTTCTTGGCGCGATGTGGACTGGT
AGTCATCGTTCTTCTTTGTGGTGAGTATACCTTGCGTTTCCGTGGTATCCATTCAGTGTC
GGATTCAAACTTTCCTAGATTGTTATTGTAGAGAGCCTGTTTCCTCATATTATATCTTGC
TTGTCTATTCAAATTCGGAGATGCTAACGGGGAAGGTAATCTAGAAGAAGAGGAAGGCAG
AGGAGGAGGAGTCATATCATCATTGTATTTGGAATATTTATGTCTAGCATTATAGGCCAG
ATTGTTGTACCGGTTGATAATGTTCTTAGAATATGGTTGGGCCAAATTGCTGAAAATTTT
GTATTGAGACAGAAACCCGTAGGTGGCGTAGCGGTACCTTTTTCTTGATAACCCATTGGG
CCATACAGGCTTCACGAACAGCACATTCTCTACAGCGCCTTTAGGCGTAGATCCCACTAG
CACTGAAGAGGCCATGCGGGGTGAGCCATTGTGGCTAATTTTCGACTCCAGCTTGGGCGA
CAAAGGTGGCGATGGTATTATATGTTCATCAACCAAGGAGTCAATGCTGCCAGAAAAGCA
TCCATTGCCATTATTTTGTGAGTTCTGGTTAATTCTTACGTCGTACGAGCGCCCATAGGG
TGAATTATTGCTATAATCACTCATGTTTAAACCGTTTTTATTACTATCGTTATTGTTGTT
ACTTGCTTTCAAATTCTGATTCAGACGTCTGAAAATGGACTGCGAATCATCCTTACCAAT
GTAATTCATATTTAATTGAGACTTTTCAGATTCAGGAGAATATAATCCCATGTTTCCCCT
ATAAATGTTACGATGCGCGAATATCCTGTTTATCGATGCCCAGTGTATGAGCCATAACGG
GGATGTTATGAACCATGTGGCTACTTTTATAAGCGGTTCTCTTAGGAAGAAGGGGGTTCT
TGATAGACCCCTGCACCTCATCTAGCGGAGGTGCACGGATGTACCAACAGTTTTAGTGAA
CATTATTCACTAAAGAAGCATTGGGCATACTCAGAGCCAATGGCAAGCTCGTTTACCAGT
TCAAATATGTCGTTTCATTATCTGTATGACTGTCGTAACTTTGAATCGATCTAATGTGTT
GACCCTGTCTCAGGCTCACCCATGGCGGCGCCTGCACCTGTGGGTGAAGGAAGAAAGACG
ATGTTTGTGAGGGAACTGAATTGGGTTGAAGTTCATATCCTAAACAAACACTTCACCAGC
CATGGATGCATGCCTTGTCTTTTCGCAGTTGGTGGCATGAAAATATATATCACCCACCAA
ACCCTCTTACTCTTTTCTTACCAAGTAACTCCAGTAAGTGCTCGTTTTTTTCTTCTTCCA
TTCAAACCTGCTTAAAAACCTCGACAAACGAGCCCCCAACGTACTACCACAGCAACCACT
CTGGTTTTTCTATCTTGTTGTCTTTAATTGCCTCCTGACTTTGTTTTGTTTTGTTCTTGC
TTAGCGCTCTTGAAAAATATTTTACTTTTCACTATCAGATTAATGTGATAGCAATAGTTA
GTGCAACAAAGAAACAAGTCGATAAATGGTACGTTTAAAAAGTAGATATATCCTTTTTGA
AATTATATTCCCACCTACAGACACCAACGTTGAGGAATCTGTGTCGAAAGCAGACATCTT
GCTTTCGCATCACAGAGCATCGCCTGCGGATGTGTCCATAAAGTCGATACTCCAAGAGAT
ACGACGCTCGCTGTCGTTGAATCTGGGCGACTATGGGTCTGCAAAATGTAACTCTCTCTT
GCAGTTGAAATACTTTTCAAATAAGACGTCTACGGGGATAATCCGATGCCATCGAGAGGA
TTGCGACCTTGTTATCATGGCATTGATGTTGATGTCGAAAATTGGCGACGTCGATGGACT
GATCGTGAACCCCGTCAAGGTAAGTGGGACCATCAAGAAAATAGAGCAGTTTGCTATGAG
AAGGAATTCTAAAATTCTGAACATAATCAAGTGTAGTCAATCATCACACCTCAGCGATAA
TGACTTTATTATCAATGATTTCAAGAAAATTGGAAGGGAAAACGAAAACGAAAACGAGGA
CGATTAGAATATATTAATATATAGATGTACACGTATATGCAGTAGTTTTATTTTTTTATC
TATAATACAACTCAAGCACAAGAATGCTTTGTTTTCCTAGTGCTCATCCTGGGCCTAGGC
GCCATAGTTATCCGATTTATCATCGGATTCAGCTTTAGTAAACTGAATGGGGCCGTGAGA
ACCACTGGCACCTTCACTCTTAACATTGACCGCTTCGTCCAGCTTTTCGTAGTTGGTCTT
GTATATGCTTTCAATATCTTGTTGGACGAACAGTGGGTTGTCATAAACCTGGTCTTCATG
CCTTTTGGCGGAGGCATTTGCCCCTCTTGTGAAAAATCTTGAATCGTACTGCAGATCCGG
TTGTTCTGAACGCTTTGCTGCGCCCAGAATTATCTTTTCGGATACGTCTCTTCCTTGAGA
GTACGCCAGCTCTTTTAGTCTGGCCACTGTGCTCGTTTGCTTTTTGGGCTTAACTATTGC
TCCCGTCTGCGGAGTCCCGTTGTGGTATCTGGCTCGTTGGCTCAATTCTTTCAATTTAGA
TTCTTTAGCAAGCATTTCCTGTTCCATAGCAAGCCGCTTCAATTCCATTTTGGACCTGAT
CTCTTGTCTTGCCTTCTTGTCAGCGTTTTCTAACGCTTCGGAGAGCTTCATAAACCCATC
GTTGATGGTATTATTTTCGTTGTCAAGAGCTTTACCTACACGTCTTTCCAAGGCCACGGT
ATAACCATTTGGATTTTTCCAGTTTGACACAGCTGCAGGTATCTTCCACTCATTTGGATC
AGCTTCTCCCCTATCATTGCTGCCATCCATATGGAGAACAGGCACGACTTCGTCGTTTTC
TGTGGGTGCTACAACCTTTCTCGCCTTCTTCCCAACGAACCTTGGCAACAATGGATCCAT
TTGCTTGGACACTACCTCAATATGGTGGCTGTTGTTCAATAATAGATTCGCGGGTGCCTG
ATGTGTTTCGGTGACGTACCTTGATGATGCCCTGTTATTTGAGTTGGCTAGTTTCGCATT
CACAAGCCGCTGAATGTATGACTTGGTTCTTGCTGTACATTCTTGGATTTCTGCTTTCGT
TGGCAAAGGAACCGATAGTTCGAAATTAGACTGTCTCTTTGGAATAAAATCATCGAGCTT
AACGTTTTTAGCGATTTGGTCAGTCAATATTGCCGGCTCAACGCGATCTGAGCTCAAAGC
CGTCGAAACTCGTCCTTGAGAATGTTTTGGAGGTGGTAGTCTGTTACTAAACATATTTGG
TTGAGGTTGCTGATACGTCCTCTCGGCTCAGAGCTGCCATGTGTCAATAACCCCATAATT
TGAACTTCTTTCATCAACTTTTTAGCTGGGGAAAAATCAAATTCGTGAAGAATTACAATA
ATACGTTAAGGTAAAAGATTAAATATTAAAAAATAGTATGAGTACTTTTGAATCATCAGA
CAAGAACAATGAAGGATATGAATAGTATTAGATATGTATTCTTTTTTTTTTCCAGGGACA
TAAAGAGTTGTTTTTATAAGGTGCGGAGTTATCTCAATTTGCTTCTGATTTTAGAAGCTA
TTCTATGCCCGGTCGACTCTTTGATTTCGATCCCAAACGGCATCATGGTAGTTTCGGAGC
CAGATTCGCCATTTTCCCACTCTAATCCATCTCGAAGACTTTTTCGAAAGGTAAACCCTT
CTTCTTGTCTCAGCGTGTTATATTTGGACTTATGCTGTAGCGGCTTGATCATTGCCGAAG
CAGGTATTGGCGGATAATGTAGCACAGCCGGCTTCTTGTACCAACCCACCTTTGTTGGTT
TAGGATTTTCTGCCTCTGTCATTGGCGGTACACCAGCAAATCTCACCCTTTTGATGGACA
ATTCACTGGAGTTTGACTCCGGATCTAGAGTTAATGTCTCTATAGCCAAAGTATCACTAC
TATTGGCAATCAGGGTACTTGATGATTTTCCTGAGGAGGTGTTGTTTATACTGGATACTT
TTGGTGAAGGCGCTAACGATGAAGATGCAGAAGGATTGGGTGTAGATGCACTTTTGTTCA
TCAAATGCCGCACTGTATCTTGGACGATTTTTTGATTTAACGTCATGGTTGAGGACTGCA
AAGAATTGGACCTTTGATTGTTGAGCTTTGAAGGTGGAGCTATTGACGGATGTCTTGTAG
AATTCAAATATGAGGTTTGTTGTTTGTTTGTATAGGATTGCAAAGATGAGGATCTAGGCC
TTCTGCCGTTGATCAGTTTTCTTTTCTCCGGAGACACCACGCTTTTCTTCGTTTCTGCGT
TTTTATTGTTGAAAGTGGTCCTTACAGGCGATACTGAGGGAGACCTAGAAGAATTTGAGG
CTAAATGCGCCCTTGCCCTTGTTCTTATGCTCTCTAAAGAGGCCTGTCTTGATGGGCTTG
CTGAAGATGTGGGTGAGGGGGATGGAGAAGAAGAGGCTGGCAGCTTTGTTATTGACGGCT
TCTTCTTTAGCTTACTTTTCGCGTTTTTAACCTCTAAATACAGAGCCTTATCTCTTTCTA
GCTTTTCTTTCAAATTCTCCCGCAAGTCATTGGTTTCATCGAAGGTTTTATAATTTTTCT
CAATATATTTCCAGCAATCCATCCAATTGGATAATAATCCCATAATGGACCTCAATTTCG
GTATAATCTTGCAGATATGATTATTAAACAATTCCACAACTAAACCAGGTTGAAGGTGGA
AAATGGGAGTTCTTGAGGAATTGTTATCGGTACGCGCCGTTTGAGTCCAAAATTTTAAAT
TCTCCTGCAGTTCGAATAAAGCTGTGACATCATCACATTCTGGAGAGAGCAAAGCCATCA
GCTCACAAATTATCAAATCGTAATGGTACACGTTTTCGCTGGATAATCTTGTCTTGATGT
CCAAGAAATGTTGTTTATTCGGTAGGAAAATTTGCCTAGAGAAACTGATAATAACACACA
AGACAGAAAAAACCCGCAAGTGGAAAGTGTATATCCTGTGTAGAGTCCATTCCCAATGTG
GTAGATCCTTCTGTAAATTTGACAGTGAAGTAGGTCTTGTTTCCGAAAATTTCTGCAATT
GGTTGTAATATGTCCTTAGAATGGGGAAGATTTTCGAATGAACACAGGAGTTCAGTTTCT
CCATCACTTGCCATTGCAATTTGTAAAAGGAATGGGTGGACTTATCCCTTACTGGATCAT
TAATCAAAACGGCTAAATCTAGAATCAATGTCATTTCAACTGGATTTAACAAGTCTTCAA
TTATTGAAGTGTCAAATGGAAGTGACCGAGCTTTGTACGCATCCCTTTCCAATAAAATCT
GTCTCAACTTGGCATTATAAATTTTTATAGCATTTTGAGCAATGCAAGACAGCGAATTTA
AAATCTTCCATTGTAGAGAATTATTGTATATGCACGATTTATAGTGATCTAGGGGTACCT
CCTCGGGAAACATCCAGCCCTCTACATCAATAAAATTAGTTGATAATCTCTGCTGCACTT
CGCTTAGCTTTATCAGCTGGAATCGACAGAGCAAATGGTACCTCTTAGCCAATACGGGGC
TTACATTAAATATAGGACCCTCACAAAGTGATAAGATGAAATTAACGAGGGGAATAATTT
TGTAGGACTCGTCATTGTCTCTTTTCTTCTTCAAATGCGGTACCAGAACGTTTAGTAGCC
TATTCAGTTCATTCAGCTTGTAAAGAGCGTTCTTATATTGAATGATTTTTATATCATACG
AGTCCAACGGAACAGAACCTTTGATTGCCGGAATAGAAGCGCTGGCAGCAGCTTTGGCTA
GCAACTTTTTTCTCTTTTGCACATCTACCATGTTGTAATATAAAACTAGTCTAAATCCTC
AACCTTCAGCTTCCAATCACTCCTTTTATCATTGTTCATTCGCTAACAAACTTCAAACAT
ATGCCTTTATTATGCGTCTTCCTGCTGTTTCAACCATTGATTGCAGGGTAACAGACATTT
TTAAGGGTCTTTCCCACAGCATCTATAAGAAAGATCGTCAAAAGTATTAGTTAAACATTG
AAAATTTGCGCCAAAGACATAGCAAGCGCAACGTATTCATTGTCCATGTCGTCATCTACT
CCCTTTGACCCTTATGCTCTATCCGAGCACGATGAAGAACGACCCCAGAATGTACAGTCT
AAGTCAAGGACTGCGGAACTACAAGCTGTAAGTACAGAAAGCCACAGAGTACCATCTAGG
AAATTAACATTATACTAACTTTCTACATCGTTGATACTTATGCGTATACATTCATATACG
TTCTTCGTGTTTATTTTTAGGAAATTGATGATACCGTGGGAATAATGAGAGATAACATAA
ATAAAGTAGCAGAAAGAGGTGAAAGATTAACGTCCATTGAAGATAAAGCCGATAACCTAG
CGGTCTCAGCCCAAGGCTTTAAGAGGGGTGCCAATAGGGTCAGAAAAGCCATGTGGTACA
AGGATCTAAAAATGAAGATGTGTCTGGCTTTAGTAATCATCATATTGCTTGTTGTAATCA
TCGTCCCCATTGCTGTTCACTTTAGTCGATAGAAGTTCACTCGCAATGCTATATATATAG
GGAGCTTCCATATGTAGTGTAGGATATATGTATATATACATATATACATATATGGGCGTA
TATTTACTTTGTTCTTATTTTCTGTCTAATTTTATAATTTTACTGACAGTAGCTAAGCCC
TCTGTATTGCTGTTCTGTGTTATTGCACTAGTGTCATAACGCAGATGGTTTTTAGCAGAG
TCAAATTGGGCAGAAAGCATAATTTCCATCTTCCCTGGCAAAGACAGATTTTCTCTTTTG
ATCACGTTAGCTAAATAATTCAAGATTTCGTTCGGTACTCCAGCTTCGCCCTTGTTAGCA
GGCTTGTATTTCAACAGAATTGCTTGTATTTGGGCTGGATTCAAGGCATACCAGAAATCG
AATAGTAACTTGAACTCGTTCAAGTTGCTTATCTTCAACTGTAATATCTTGACAGCCTGA
ATTATTTGAATCAAATTGGGACGAACGTCTTCAATTCTTGGTTCAAACCAGCTCACCAAC
CGCTCGATATTTCTATCCACTTCGTACCCATACTTCCAATTTAACGCGGGACATTTGGTT
ATTAGGTCATTAAATAGCATTACGTTCAGATACTTCAGGGTGTCGTTAAAAATTTTTGTA
TGCATTGAGTCAACAACTTGAAATTTACACAAGACAGCATCAAATTCATTTAAGAATGTG
AATAATTTAGCGAACTTCTCATCACCAGAATTTTTAAATAGCTTCTCGTTTAAAACCATA
TCGAAGATCTCGATGTGGGCTGAAGCATGCTTCATGAATTTCACTAACCAAGTGGAATAA
ATCTTGTCGAATACTTTTAAAGTTTCATTCTCCAAATCATTCAAATATATCAGTGTTAAC
TTATCTTTTTCATCACCACCATTCGCTTCATATAATGTTTTTTGATTTGCAGCAAATGCG
GGAAGTCTGGAAAGATTACTTAACCAAAAGATACCACCAAGCATTGTTTCGTCCTTTGGT
AGACTCATAACAATGCTTTCTACAGTCAATAGGACTTTCGAGATGAATTTGCTACTTTGA
ATCAATAACCCATTTCTCACTAAGCTACTTACCACTGTAGTAATGACGTGTATAGGACCC
AGAACATTGTCTCCATTCACCTCAGTAACATTTACTTTTTTCAAGTAACCTTCTGTGACT
TCTAATGTGTAACAATTCAGGTCCATTAGTAATTCTAGAAGATCAGGATTTCCTGATTCT
CTACGAATTACATTGACTAGCTTCGGTTTTACTTGTTGTCCTGCGATTCCCAAACCTTTC
ACTTTATCATTCTTATTAGCAGAATATGTGGTGGTGAAATCTTGTGCTATTACGTTTTCA
ATAAACGCTAGTTCTTGCTTCATTGATTTGACTTCATCACTTAATCTTGAAGGTTTGTTA
CCTTTTATAGCAGCCAAACTTTGCATATGTGACTGTATTAAAGAAGATTGCTTCTTTTTT
CTCTCCTTCAAGGCATTCTTCTTGTTTAAAGTATTCATGATTTCAACTTGTAACGTCTTC
AGCTTGGAAATCTTATCATTATAACCATTTACTATCGTTTCGTACTCTTGCCTTTGCTTA
GATGGAATATTTGACAAATCTCCCTGCAACAACTGTGTTAATCTTGTATATGAGTCATTT
AACATCTCTAGATTCAAAATGAAAGAGTTCTTAAATTCGATAGCTTCCTCCAGTAATCCA
ATCCCGTAACTAGCCCTAATATTCCGTTCTTCAACTTCTTTTTGCAGAACTATATACCTT
CGTCTAGCTAACTGCATTCTCATGGCGCTTTGTACAAGAATGGAGCTCCTTTTCAATGTT
CTGTAATCTGTTTTGTGACCATATGATCTGATGTAGCTTTGGATAATTACTGCCGCCATG
AGCATGAATTTCCTGTTAACACTATCTAAAATCAATTTTCTTTTACAGGTACATTGTAGT
TTTATTATTTGCCCAATGGCAGCTCTATAGTATTCCCGTTTCCATAATGCTCTAATGTTC
GTTTGTAGTAATATGGCAGCTCTTGTCTTGAGCTCATGATCGACCCTTGTACGAACCAAC
AAACTTCTAATTTGGCTTTGGCACTTCTTTATTGATTCCATGGTCTGCAAATACTGAAGC
CTATAGTATCTTGCCCTTATCTTTTTCTGTATTATGATGCATATTTCATTCATTTTATTA
GTCCTTAGCTTTTCCAAAAATGCAAGCATTCCTGCTTTAAAGAAAATTTTGGTATTACCA
ATTTGGTATTTTGCTGAATCAGAGATAGTAGCATCTAGAATAGATTGACAGAAGTTGACG
ATTGCCTCTTTTGGGAGGTCTGGATTATAAAGAATTCCACTCCATAAGCTGTAGTCCGTC
AGGAGGAAATATCTTTGAACGAATTCGTCAAAAGTCCATCTTGATGGAAAGCCTGCACAT
GAAATCCTGATTGTTTCCAGCACACCACAAGCTCTTAATTGCGATAAGACCATCAAATTA
TCGAACTCCCATGGCTTTTTTTCAGAATTTGGTTTTATGCAACGAATATAATGAACATTA
GTAGAATTTATGATGGCCATCAATTCCCCGAGCGATTTTTTGAACATAGATCCCAGGGTT
GGTTTCTTTTGACTTAATCTTGCTGGGATCATTATCTTTTTTTCAGTATTTTGCTCTTCA
GGAGCATCGTCACTCCTAAGTTCTCTGTTGTCTAAAATTTGTTTGAAAATTGGATTTGTC
GTTGCTTTGAAAACATCCAGATGACCTAGGGAAACGCTGTCTCTATTCTTTTCAATAAAC
CCTTCAACTTCATATTCTACATCAACAGCATAATGGCTTACTATAAACTTCGTTTGTCCG
AATCTTGGCTTCGAAAAAACTTCATTTGAGGGCGGTTTATTAAAGGCAGAATATAGTTTT
GAGGCCCATGATTCATCTGAGCCTGATGGTAATCTACTTTCTTCATCTAATAGAGAAAGT
ATTCCAAGTTTATTCTCAATCAAGTCTATGCAAGGTTGGTTGTCGCTGAACTCAATGAAA
GACCACTCAATTTCCTCCTTTACATATTCTTCTTGCTCCAATTTGAAAACGTGCTGGTTG
AACTCTTGTTGTAATTTTTCATTCGCATAGTTTATACAGAATTGTTCGAATGAGTTTTTC
TCAAAATGCTCAAACCCGTAGATATCTAAAATACCAATAAAGGAAAAGACATGATCTTGT
TGATCCAGCTCAGGATCGTATAATGTCTTGTTAATGTTGTCTACTAGCCAATCAAAAAGC
GTGGAATAAATAAATTTCGCCACAGAGTCCCTAGCAATTAGCGCTTGATTGTAATTCAAA
TTAGTGACAATTTTTTCAGACCTTGTGACGATTTGTTTCTTGACAATCCATTTTGCAAAA
TTGAAGGGATCAATACCCAATAATTCACATGCGATTTGCAGGTTTTGCTCTTCCGATGAT
AGTGATGCGTCGTTTCTAGTCATTTTCATCTCGATATTACCTATATGTAGCAAGCCTGCA
AGAATTTTGAAAATTCCAAGCTGAGTCTCGTGGTTTATACCTACTAATGACAGGGCATCA
GTGGTTATCTTGTATTCTCGAGCTTCATCTATACCAGCTATGTTCGGCTGTCCACCTTGG
TTAGTATAATGGTAGTCCTTGGGAGATGACAAATGCAGTTCTTGTTTTACCGGTTCTGGC
AATCCTTCCAAAATTTGGTAAAAAATATGGTAATTTCTTTCTGTCTCTGGCTGATAAACT
AACCTGGATTTTTCCAAGAGATAGGTTCTAATTTTGGACCCCCTGATGGTAGTATTCTCA
TCAAATAAAATTTGCAGATATTTGCCGAAACGAGAGGAATTATCATTTCTGGTAGTTTTG
GCGTTACCAAAGGCTTCCATGATCGGGTTAGTAGCTAAAATTTGGCTCTCGATTTGAGAC
ATTTCCACTTCCCCTTCACGATTGTTGCTTTCTTGGACTGAGGCAAAGTATCTCATAATG
TATTTAGCAGAGACGGTCTTACCAGCACCGGATTCACCACTGACTACAACAGTCTGGTTA
GCCTTTTCATGGACCATGAACCTGTACGCCTCCTCTGCTATGGCAAAAAGGTGCGGCTCC
AGCTCATCTTTACGCTTACTAGAATAATTCTGTATCATCTCGCGAGAGTACAAATGGTCG
ACTTTATCAAAGGGATTAGCGGCAATAAGGACAATACCAGAGTAAGTATATATCTGTCCA
TTCATGTATCTTTTTTTTATGGCATGCAGCACTGCCGGTTCGTTCAGATATGATAGGGTG
GTTAAGTCATCAGTAGACTCTAAAATAGGTGGGTTTCGTAGTACAGGTAGCGTGGGATGA
TCATCATCATTTTCGAAGCTATTTGTTTCAATGGATACAGTTTCTCCATCCTCCAATTTC
AACTCTAAGTGGAACGTTCCTTCAAAGAAGTCATTCTTGGTGACTTCGCCGCCTATCCAG
CCTTGTTCTTTGTGAGGGTACCAACACTTAGTTCCTACTTCAAATGACATGCGGGAGAAC
TGGTTATAGGATTTTTTTTGTTTTTTTGTGTTTTAGAATTAGATTGAATTATAAAAAGAA
GAACAAAAGGGTATCGTATTGAAAATAAATTGTCTCGCCAAACTGGTAACAATGTTTTCA
GCTAGAACAATAAGAAAAGAAGAGAAGGTAAAAAAAAAGGTGATAACTCCGTAGGAATTG
AGGAATTGAGTATGCAGAATCAGAATAAAGGCTGACTTTCAAAAAAAGGTTGTATTACAA
TTGCAGGTTTTCGATAAAAGAGACCCTATTCTCATCTACTACTGCTAAACTTCGAGATAT
TTTCGAATTTTTCAGTCTTTTCTTTTTTTTTTTTCGCATTAGTTCAGAACCCTAAAGAAT
GGTAAACATTCTATGGATAACCCGGAGAGTGAGTTTCTTAAAGACCTAGTTTTATTTTAA
GGGTTTTAACTCAATCTTGATGTTTTCATTGTGTACCCTAAAGAAAGTTTAAGAATAGCC
CTAACTGTTACCTTTTGAAATAAAATAAGGGGAAGGTCAAAAAGCTATTGTTCTATTGTT
ATGAAACATTGTCTCAAAGAGTAAGAATAACACAAATTGATGGCAGTTTTTTACGTAGTC
CAGTAGTTGTCCAGGTACAATGCAAAATGCTCAAATAAAGAGCTCTTCTAAAGGCAGCGG
AATAGATGGTACAGATCGCAATAGCAAAGATGGTGTAGAAAAGAGACCCCTGGAAGATGT
AAAGCAAATGATTGACGCTGGAACACCAGATGTTGGCCACAAATCTACTGTTGAAACTAA
GCCAAACGTTGGATGGCAAGCCTCTCACAGTAATTTGGCTGCATTACACGAAAAAGAGCA
GAAATATGAAATGGAGCACCATCATGCTCGTCATAAACTGCATCGTCAAGTTATTCCGGA
TTACACGTCTGCCTCGACCGCAATGTTCAGCGATTGTATGTTCAACGCAGCACCAGATAA
AGTACGAAGTCTCAGTACGATGAAGTCTTCTGGACTCTCGCCAAAACACCCATTTAACGT
AGTCGCCACCTTTAAAGGACCATTCCCGCAGCATAGTGTAGAATCAAAGCCTCTCGATGG
TGGATACTCTGCCAAAGACCATTTTCCCTCATTTAAGATGTTGCAAGCCCAGCAGCACCC
AGCCCATCGCCATTACAAAGACAACGACAAGTACGGTCTTAAATCACCTTCCCGGTCCTT
CGTGAAGGACAAGAAAAGGTTGGTTCACCGGTTTTTGAAATCCATGGAGCCTTCTTCGTC
TGGGCAATCTAAGGATTCGTCTGCACTGGCGCCGGCTTTCGATCCAATATTGCCCAATGT
TATATCTAAGCCTTCCAAGCGACCCACACATCATTCGCATTCATCAGACGGGAGTTCTAG
CACGCAGACAGATATATCGTTACAGAGCTTGCTTTACCATGATCTTGAAAGCTCACCAAA
GAAACATGTTTCGCCCTCAAGACCGCCCTCTGTAGCTTCCGAATCCTCTCCTGCCGTTGC
TAATCCCATTGGGCTTTCGCCAAAAGACGCCTGCAATGCATCGTTTTCGCAGTCGTCCTC
ATCTTCGTTGTCTTCTTCTTCATCGTCTTCATCATCGACGTCATTCTCACAGTCAGTGGC
TGTTGATCCTCTTGAACCTCCTGGAAATATCACATATAGTAGTTCGAATCTTTCGCTAAA
TTCAGATGAATTAGACTACTATCAGCGTCATATCGGATTGCAGTTACAGCAGACAGAAGC
TTTACTAAAGCACAGTTTGAAAGATGAGGTTCTGAAAGATGAAAATGACCTTGTTAAAAA
CATTGCAAATTTTGACAAGATCGTTAAAGAGCTAAGGGACTTAAGATCCAGGACCATTGG
ATGGAAAGAGCTTGTTGAAGAGGATTATTTAATGAATTTGAAACAGGATTTTGACAAGGA
AAACCCCGAATCATTTGAGGCACGTTTGAGTGATACAATAAATACAAACGTGGCAAAATT
ACAAGATTTAGAGAAAAGAATGGCTTCTTGCAAAGACAGGTTGGCCTCTAGGAAGGAAGT
AATGAGGAAAATGGAAAGTTTATTGTCTTTGGAGAATTCCTTAATGATATCCAAAAAAAA
TGTAACATTCGCATCTAAATACCGCAACGAGGCCCTTGATATTGTCTTTTTAATTATCAT
CATCGTCATATGCTATACCTTCAAGCATCTAGTATCGCATAAATAAAAAATAGTATTTGT
ATATCAAAAAATGATCCTGTGATTTTTTCATATGTAACGTATAAATGTAAAAATGTGCTT
CTTCTGGTATTTTTAATCAAGTGGAAAGATGAGTGGAAAAAAGGGCAATGAAATAGAAAA
GGACAGGCCTGAAAGGGAAGAATACAAGAAGATTGAGTATATTGGACTTCACAGTAACCG
TGAAAAATGGCACCAAGTATAGCAACGGTAAAGATAGCCAGGGACATGGTTTTGCCATTA
CGTATATTTGTCAATAGAAAGCAGATCCTTCAAACCAATGATAAGACTAGCAATAAGTCG
AATGCCACTATATTTGAAGCACCATTATTATCAAATAACTCCATAATCTGCTTAAAATCA
CCAAATACAAGAATATATTTATCGCAACAAGATAAGAAGAATCTTTGTGACGAGATCAAG
GAGGACCTGTTATTGATTGTTTACGAACTAGCGTCCCCGGAAATCATCAGTTCCGTACTC
AGCAAAATAAGAGTTGGTCATTCTACTGATTTCCAAATCAACGTTCTGCCCAAACTTTTT
GCAGGTGCCGATACGGATAATGCGGTAACTTCTCACATCCAGTCTGTGACAAGGCTGGCT
AAATTCAAATACAAGTTGCACTACAAACATAAGTGGGAGCTCGACATATTCATCAACAGC
ATTAAGAAGATCGCCAATTTAAGGCACTATTTGATGTTTCAAACATTAACATTAAACGGT
TTCTCATTAAATGCAGGACCCAAAACGTTATTAGCTAGGAAAATAGAAAAACAGCCCCAG
GTACCTAATTTGTTAATAGAAAATGGGGACGCTGATGCCCTGGATACACCGGTGGAAGAG
GATATAAAACCTGTAATAGAATTTATGTACAAGCCTGTTATTAATTTAGGTGAAATTATT
GATGTACATGTGTTGCATAGGCCTAGAAGACATAAGGTACGTACCCAGTCGAAGCAACCC
CAGGAGGAATGAAAAACCGATAACAAAGTGATGGCTTAATATTATAACTTCTATATAACG
GATATATTTTATGGTAAATGTACATATTTCAGTAATGGTAATAATGACTTTTCTTTTTAT
CTTATTTTTATTTTTGTATTTTTTGTCTTCTGCTCTTTGTTTCTGTGCCTCATATATCAA
ATGAAATATCATCTCTCGAAGAACTGAATCTATTTGAATTTTGATTACCATCAGCAAATG
GATTTTCAATGAACGGTTCTGCACTTTCAAAGTCGTTACTTCCCAGTCCATTATTGTCAT
TAAAGGGGTTCGCCGAAGCATCTTGTAATTCACCGTACTTACCTCTCTTTTGAGTAGTAT
CATACATTCTGACAATTTTTTCTTGCCCACCCTCTTCAGCCTGTGAAAAGGCAAATCCTC
TTTGTTTTTTCATTCTTTGCACTTGCCTCACCTTCCTGATGGCATTTTGAAATTGCTGAA
CGTGCGGCCTAGAGTCGCTGATATTGTATTTCTGCATTTCTTGAATAACATGATACGTTT
CTGGTTCATACATTCTTTTATAGTACTTCCATAGAAAATCTCTTACCAGTGCAAAAATTG
GTAAAACGATCAAAGTTAACCAAAATACACCGGATCCATACGTGTGTTTAACCACACCAT
AATACTCTCTTGAGATGTTAGCATGAGGAAATATAGAAGCATAAATTGGGAAGAATATTA
ACCAAAATAAGAGGGAACCAGGAATGGCAATTAAGGTGAATTTCGTCCATTGATTAGTTA
CCAAAGCAGCCTTTCCCAAAACAATAATGACACTTGTAGTGTAGACAGTTACACCCCAAG
ACCAATGATCAGCTAGTTCGCCGTGCATATTTAAGGCAAACCCATATCTGTAAATCAATA
TGGTGCCAATAAATACTATTGCAGAATGGAAAAAGCCATTAATAATCCATCCCCAGAAGA
TGTAAACAGAGAAAAATTGACCCTTCTGTCCTAATTTGTACAATTGTGGGTACCGCTCAA
GTAATCTACTACTAACAAATTGATCAAATACACCAATGACAAAAGGGGGCCAAACAGTGA
AGAATAAGTTGTAGAAACTCATTGTCCATGATTCCATAATGGATTGACCTGAAAAGGCAT
TGGCAAAAACGTACCAAAACTGCGTCATGTATAATGCTGTATTCTTGTAAAAAGAGTACA
AAATTGCGACAGAAATTCTTTGATAAGACCAGGAGCCATGGACAAGTAATAGTTTTTTTA
AAAATTTAAATTGGCCAACAGCTATATCAGCTGAACGAGCCGCTTGCATACCTTCCATAC
CACTAATACCGACACCAACATGAGCTGCCTGTATCATACTAACATCGTTGGCACCATCGC
CAATGGCTAGCAGTAGTGAAGACGACTTTCTTTTTACCATTTTAACAACCAAGGCTTTCT
GTAGTGGAGATACACGGCAACATATAACCGCTTTACAAAGCTTCGCCACAGTTAGCAAAT
AATCTTCTAATTCTGGTTCCAAGGCAAAGCCTAATGACTTCCCATCAATGACGAGCGCTA
AGGTATTCATATCATGTGTTGACAATTGATGCTCGTTTAGAGCGTTAATCTTCTCTAACA
AATTTCTCTCAGTATCATCTCTGGTTTCCTCGTTGATGATCAACAAATTCATGTCTTCAC
TCAATAAACGGCAACTCATACCAATGTTAATAGCAGTTTCCTGTCTGTCACCAGTTAAAA
CCCAAATTTTAATACCCGCTTCTTGTAATGTGTGGATAGTTTCTGGAACACCGTCCTGTA
ACTTATCTTCAATAGCAGTTGCACCAATTAATATTAGATTTTTCTCGATTAGATTTGCGG
CTTCGTCTAGCTTCTCGGCTCTGTTATCTAATGTTGTGGCAGCCTCATTATAAATGCTAT
TCCATTCTTCATATTCTCCTTCAGAGATATCTCTCATCGCCAAACACAACGTCCGCAAAC
CCTCAGATGCATAATCTTCTAAATGTCTCATTGTAGCTTCTACATATTGATTAGCTTCAT
CATCCAATCTTTCCAGAATGACAGTATCAGCACCTTTACAGAATAACTTTATCGAACCAT
CCGGAAATCTAAATATAGCGCTCATTCTCTTCCTGGTGGAATTAAATTCACAAATGTTAA
GTAGTTGATACTCTTTTTCCTCGCCAGTTTCCTCCAATAAAACAGTTACAGAGTTTGGTT
TACGGATGATAAACTTATACCCTAAATCTGCACCACCTTGAACGAGGGCACCTTCATCTG
GAGAGGCTGCTTGATATTTAATAGATCCATCGCTTTGAAATTCTGGAATGACAGTATGAC
AGGTAGCCAGTAATGTTAAGAAGTCATTGATAATAGGTGAATCCTCATCAGAGGGATCAT
TTAACTTTTTCTTCAAATCGTCAAATTTTCTATAACCAACTTCAATCCCATCTTCAACAG
TGGCCGTTTTATCTTCAGGTATTTTATCAATATAGCAATGGCCTGCAATAGAGCAGGATT
TAAATTCCATAATATTTCTTGTTAAAGTTCCTGTCTTGTCACTGAATATATATTCTATTT
GACCAAGTTCTTCAACCAAAGAGGATGTACGAACCACAGTTGGGGTATCAGTTTTTTCGT
AGTACAAATCTAGATCTGAACCTATCATAAAAGCCTGATAATATTTGATTAATTCAACGG
TGACAAATAGAGAAATAGGAACTAGATTCGAAAATAGAATCCAAAATGTTAAAAAGTCTT
TGAAGAATAAGCCAGCCTTGTTGGTACCCTCCAGGTAAAGGTACGATAAATGTTTGGCAT
CTGCAGTAGACATAATAACATTACCAATTGAAGAAATTAAAATTAGCACGATTAAAACTG
TGAACAATGCAATAATCTGTCTGTTGATAATTTTCTCAACCGCGGTTCTTTTAATTGGGG
TTGCAGTAGCATTACGCAATAACTTAGTTTCATGACCAGTGAAGATAACTAAACCAAATA
TCCATGCAGTATTTCTTAAAGTTGCACCTCTTAAAATCATTTGGTCAGGAGATAACGGTA
TTTGACGATCATTTAAAGTCATTGTACCTTCATAAGTATACAAGCTAGAGTTCGGCTGTT
CGGAAACAACTTTTCCGTTCATGTTCTTCAAAGTTTTAACGTCTATAAATTTGGCAGTTT
CTACTCTCGACTGTTTGATTTTCAAATTTGTTTCACCATCCAAGTTGGCAGTTTCAATGT
AGCAAAGACCCTCCGGTTCCGAAGATGACAAAATTATGGTATCAGCAGGAATAGGTTCCT
CTGATTTTACTCTAATTATGTCACCTACACGAATATCAATCCATCGTTTCTCAACAAAGT
CATCATGTGCTTCTGAAAATATTTCTGCTGTCGAATTATTTAATTCTTTATCAGAATTAG
CTCTCTTGATATCTTCGATACATTCCTTCATGGCAGAAACAATCAAAACCACTAATAAAG
TACCAATTGTGGTGTATCTATTAGTTGGCGAGACGTGAGGCACCTGTTGAATGGCAGATG
TACATAAAAAAAACAGATTAGCGTATTTGGAAAATTCTTGGAACAAAAATTTAGGCAGAA
AGGTCGCAAAATTATACTTGGTGGTAGATATATGGTTGTCACTATAACCGAAGGAGGAAT
TAGCGAGAGAATCGTTGATGTGGATGACTCTTGGTTCACCATTGCCCTCTGCGTCGCCAA
CGTTCTTTCTTAAAATGTACCGGTTGAAAAGAATTTTAATGTTGAACTTATTCCTCGAGT
CTAGATAATTATCGTCTAATTCGTTATTAGTCACCGCATTGTAATGATTCATTTCGAAAC
TTTCGGGCCCTTTCTTCCGTTTGAACGTAAAGGCATTTTTGAGACCATTACCAAACCTAG
CAAATAAACCGGGAGGCTTGACTGCTCGTAGGGATTGTGGTTGATATGCATCTGAGTCGA
ATCTATTGGCATTCCAAGACGTTTGGTCGTCATGGTTATTGCTCATAAATAGATTTTCAT
GGACATCATTTTCAATGTTATCATCATCAGCGTCTAAGTCGATAGTCTCTTCGGGAAGTA
CATGACTTGGTGGTATATAATTCGCGTTCGCATGTGAGTTGGTGACCTTTGAACGGGATC
CAGAATGAGAAGTCGTGTCGTCTAAGAAGTCAATATCGAAAAGCGTGTCGTCCTCCCCAG
GTTTCCTCTTTGGGGGGGTTTCTCTGTCGTCATTCATGGTAAAATCAGGGAATGAAAGAA
CCTACCAGTAAATTATTGCTTGGCGCTAACCTCTATTTGGCGTTACTGGCTTCTTGTTGC
ACTATTCCCCTTAGAATTGCCAACAATTGTTGATTATATGTTTCTTCAACTTAGTGGCAT
TAAACAGATTTGGGTTTTCTGGCAAAAAAAGCCAATCACGTGATCAGGAAGATTTCAGTG
ATTTACGCTTCAAATAACCTTTACCTCAATAATCCCGTAATAGTAAGCTTCTAATAGTAA
GCTTCTAATTTGCAATGTTATTAGCCCAACAGCTACTAAAGGTATTATTTTTTTTTTTTT
TGATAAGAAATTTAAGTGTTACAGAATGGGCCATCTTACAAAAATAATAGTCTTTATGTA
TTTTTATATATGTAAAAGAATTGAAATATTTTATAACTGGTTGTTATTATGGTACAGTGC
GCTGCCCAATCCACGTGGAAAAATCCTGTTCATTCAATAATAGAAACTGAAATCATGTAA
TGTTGCGTAGTATAGTGCGTGAGCTTATTGTGCCACTTCTTGCTCAGCATTTTGAACTTC
GTGTTCCTCCTCGTATTCGATTTCGACTTTAGGACGTTTAGTTTTGGCACTAGTTCCCTT
CTTACGTCTCTTGGCTGAATTCTTATTTTCTTCATCACTATCGCTGTCGCTCTCGCTTTC
ACTGTCGCTTTCGCTTTCACTGGCGCTGGAAGCTTCTCTGTCAGAGTCAGCTAACCACTT
TTCTAAGTCATCCACGTCAACGTATTCACCTTCGCCATCATCTGCAACGTATTCAACTTC
CCCATCATCACTTTCCTCTTCTTCATCCCAGTCTTCTTCCTCGTCCTGAGAATTCTCCTC
TTCCATTTGACCCATTATCTTCTTCCAGACCTTTTCGTCAACATTTAATGGTTTATCACC
GTAAGCACCACTCTTTAATCTGTCCATCAATTCTTTTTCGATGGCTTTTTCAATCTTGGC
AGCTACCAATGCCTTTCTCTCCCTGTTTTGTTCTCTTCTTTTGACCTTTGGTGCTACACC
AACGTAGTGTCTCTCCTCCTCCCTTAATGCTAAACGTCTCTCTGTTATCATGACCTGCGT
CAATTTTGTAAATCTCTGTTTACACTTATGACGGAAAAACTTGCTCCAATGTAGTAGGTG
TTCGTCGATCTGTTGTAAAGCCTTCGTGTAATTTTTGGATAGTTTGATTCTTTCCCATAA
CTTGGCAGGAGTGTGCGCTCTTTCAGGCGTCTTCATATACAAGTACAGTTTCCCATTGTC
ACACTTCACTGTTGCATACTTGGAGTTGGCAAGTGGGCATGATTGCCTTGTACACAACCC
AGTGACGTTATACTCATTTCTGCAAAAATTTTGACCATTAGGTGCCTTAATTCTATGAGA
GCAGAAACTTTGATTAATCACTTGCCAAACAATTTCGTCGGACATATCCTCGTTGTATTC
TAACCGTTGTAGTTATGTACTGAAGAGAACACTGTCAAAAGAAAGAACTAAGCAATGCAA
TATCTGCCTCTATACCAATCACTTTTTCATTTTTTTTCAAAAGCTCATCGGAAAATTTTT
CAAAAAAAAAAAAAAAAAAAAAAAAGGTTTATTACCCTACTGCATTTTGATAATCTGAAC
ATAATGAGCTAATGAAAGCAATTCTCATTTAAAAACAAGTATTCTCTCTTATTGAAGTAT
GCATTATCTATCATTATAAATTCTTTTATTCTGTTCGAGTCCATGTTTTTAAAAAAAAAA
AAACATGTATGTATGCTCCATCTATATATGCTCCATCTGTATATTTTATATGCAAAGTTT
TTTACAAGAGGAATTTGGGAACTGGAGGAAAGTGGCACAATACCTCATGTGGATAGTTCA
TTAATCTCTTCTTGTGTTAATGTGCTAATATAAACACACTTACTCAGCAATTCGTGGTTA
ACTTTGAAAGTGTAAAACTTGGACCATTGAACCCTTTGAATGAAATTCTTGACTATTTGA
ACGTTCGTATCGAATTTATTGTAATTCACTACTTTATCTTCTAAGATCCAGTCTTTCTTC
TCTGCGTTTGCTGATAGGTCCGAAAGATATACGACGATGAAAGGGACGCAACCCACCAGT
GGATTCACAGAGTTAAGTAGATTTCTTATTGTAGAATAATTCCTGTCTAGCGAGGGAATC
TTCTTTAGCTCTTCCCAAGTCAGTAAGTCGCCTGGTTCAATCAGACGCCATGCATCAGTG
AATTTTTGAACAACTGAAGAACTTAAGGCTAGAATGATTTCCATCAATGTGTTAAAGTTC
TGAAATGTCCTGCAGTGGTCTGCAACGTGTATAAACCTTTGAATGACATTTCTTTTCATT
TTGCTGCTCTTGGTAAGAAGTATTTCTGATATAATCCAATCCACAGTTAAGTTAAATCTG
GATATAGCTAAATCAATGCCAGATAAGGTCTCGTTCCTTACTAGTAGTTGCAACCAACTT
ATAACTTGTGGGCCTTCATGCTTCATCTTTAAATCTAATAAATCTTTCCAGTCTATTTCT
CCTAAAATTTCCTTCTCTATCAAGGTCATTTGTTGCGCTACAGACAGGGAATCGTACATT
AGTATAAATGGAACGTGACTTTCATTATTAGAAATCATTAATCTCGAATCGTGAATCCTG
TATTGACCGATTAATTCCTGGATTTGCGCCGCTTGCACAGCAACATCAACATTAGCTGAC
ACGTCTATTTTTTCAGGAGAGGAGGAAGTAAAGCCTTCCTTCTCGGATTGATCTGGAGTA
AAGGGGATATTCATTATAGTTTGTCTCCTTCTTTCTATTAATAACGATTTTCTTTTTTCT
GCGGGGCTATTTTGGAATGACGGCAAGTTGTTAAGGTTTAGCATTTCCACTTCATCTGCT
AACTTGCTCGTTTTAATTCCAATAGCGTCACTACTCTTGGTGTTCTCTGGTTTTTCGGGA
ATTTTCTCGTATGTACCTTCCAGTTTCATTAATGCCACGGTTATTGGATCGTCATTAATT
GAATCATCGAGCATATTAGCAATTTCATTTAAATTTTTCTTATTCAAGGAGCCTGTAAAA
GCCGACTCAGAGTTTGCTCTCCGTGTGTTCCGGGCACTAGATGTGTCATTAATGTCGATA
TCGTCCATTGTCAATACACTTCCTGATATGTTACTATTAGTTTCACTCTCGTTCTTCAGA
AATTTACTTTTCAGCTCTTCAACGTTTTTCATTGGAGAAGCAACGTCAATGCTACCGTCA
TCTGGTGAAAAAAAATACTTGTTGTTTTTCGCATGGGTACTTGGACTTTCTAGGTCATTA
TTGGAATCGCTTAAATCAATTGTTTTTAACTCATGCAATGAAGAAGTATTTGAGATTATA
TCTTGATTACCCCTTTGATATTCTTCTCTCAAATTTATTATCCTTTGGTGTGGCACTGGT
AAATCTCTGGACGTTTCGAAAGTTTCAACTGTGCTACCAGTGGTAATCGAATTCAAATCA
CTTACAACAGATTCTATTGTGGGTGCTATGGATAATCTGATTCTATTGGTTTCACTCACG
CTGGTCCCGTTGGGAAATTCTCTCTGTGGATTTTGAGTTTGTTTTAGAGGACTATTCTGA
GCAGATTCAAAAAGCTTGCTCGTTGAGATACTGATAACGGTGGACGATGTATCAGAGTAC
AACGCGCTTTTTTTATTATATTCCAGGTTGAGAGGTTCTATTTCACTTATTTCCTCTATA
ACTGAGTTTGACTTGTTTTGCTCAGGATCTACTATGGATAACTCTTTGGTTGGTGTTATG
GCAATGCTTTGAACTCTTGAAATGCTGATCCTTCCACTAGCCGGTCTTACAACTGCTTGT
TTGATCTTGTGATTGCAAGATGAATGTTTTTTTCTTGTAGTTATATCATAATTATTGGCT
TCTGATGATGCATCGAGTGAGTTGTCCAGCTTTTTTGTGCTCTCATATTCTGATTCCTGA
TTTTCTTTGTTATCATAATTCTTTTCAAGGCCATCTATAGTACTCTTTTTCTCATCTAAA
GACTTGGTATCTTCAAATGTAAACTCTCTTAGATTTAAAAATCCAGTTTTTGTTTTTAGA
GTTGGACTATCTGTATTATTCACGATGTTTCTGACTTTTCTTGACTTTTTCGTTACAGTA
TCTCTGGGTGGAGAGCTGGATGACAACTCGGAATCGTATGAGTATGTTATTGATTCTGTG
TCTTCCCTACTATCGTTTAAGGGAGACGATTCTTTAAGATCAGGTAGAACATTTTTCAGA
GGCGAAGAAGTCATGCTTTTTTGGGATTGGGAATGATTTTTCCTCCTTGGTGTCATATTT
GTAATCGCTTCTGAGTTGGTTTTATCAGTTTCATGGAATAACAATCTTTGAGGTCCATTC
TCGTCTGTACGTGAAGAACTATTATCTTTATCAAAGAGCCTCATACTTTCTGCTGAGTAG
CTACCGTGCATTTTATTGTAATATGCTGTCGTGAGACTTTTTACTTTCCTTCGTTGCAGT
GCATCATACGAGGGTGATGGCTGCATATTCGATTCATTGTTCTGCAGTTGCTTGTTTAAA
GTATTAGTTAAAGAGATGACTGACTGAGCAATTGAACTTACGGTTTGATACAGATCCAAA
TTGTCCATAGCGCTAAAATTATCATTACTCGGTTTAAAGCTATTTTGTTGTAAAATCTTT
ATATCATGTATGTGTTCCCGACGTTCACAATCAACATTAACTGTAGGACCTCGGTTGTTA
TTCGAATGTGTTTGAACTTTTTCTATCAGCTGGTTTTGTAAATGCAGTAGGGACTCCACT
TCATCTATGGTTCTTGCACTTAGGATGTCAAATTTAGAAGAATCAGAGTTAAGAAACTCT
TCCTCTTCTTCCTTGGAAGATTTTCTATTGAGAGATGATATTGATACAACGTATTTGACA
AACGCATCCATTTCAGGTTTCTGGTTTGCTGGTTTAATAGCACTCATAAATTTTTTATCA
TTACTGCTATCATGGCGATTATGGTTTTTCATCCACTTAGCTAAAAGACCAATAGCGCTG
CGATGTAACACAGACATTGAAGATGTATTAGATCTACTATTACTGTTGCTATTGTTATCT
AGAGATGATGTCGTCGATGTACCTTGAAGCGTTCCGCTTTGTTCATTTAAATCTTCAGGA
ATATATAAGGAATTCAGAATAAATTCAACTTTTTTAGCCGGTGTTGGAGGCATTATTTTA
TCGACTGCATATGATGACGGGTAGTCTACGCCTTTCATTAGTGTGGATACTAGAGTGACT
TTTGACAAGTGGCTGATCTTTTGTTTACTATCTGACATGTCCTCGCTTTCATTATCAACT
GAAGGTTCTTTCGCTATTCGGTGCTTCGAGTAAACATTTGATGTATTATCGGGAAATAAA
AGCATAGAAGGGCTTCTCTGGTTTTTGGAAGAATTTGAAGACTGTAGCTTCTCCGGCAGT
CTAAATACATCAGAAGTTTTATATAATGATAAAACGCTTTGGTTACGAAAATCAGGACTG
GCAAAACTTTGCCTGGCGTAAATGCTCAGTCGGCTTCCTCTTTTGTGTAGGCTTTCTAGT
TGCGTGAAATCCTTTAACGAATAATGCAGCCATGCATCAAAGTCTAATTTATCAGGTTCA
TTTAGTTCAATATTCTCCCAAACCAACTTAGAACAATGCACCCAGTTTTTTTTCAGATTG
ATTATACAGCTGGAAATTATTTTTGGGTACTGTTCAATGTGTTTGTCGTTTAGAAACTCG
ATCAACCGAAGTCTTAATGTTATGTTCGGTAAAAAATCTTGCACAAAATAATTCAGTATG
GAATGCCTCAACAACACAAACGTCCTCACGAGGGCAACTTCACCAATTCGCCTTCTCTTA
GCTTTTGCAGCATTTGTTGTGATCTCCCTAATACACCATCGAAATCTATAGATGAGTAAG
TCGTGTAAGTCTTGAGGCGTTATAAAATTCCTATAAATAAGGAAAAAATCTGCAGATGCG
TTGTAGTCTACACCTTCCAAAGGGGAAGAAAGGTGTACAATTAACGCGGGCAGGTCTGCA
CTATTCACTGGTTTGGATACACAATCGCTTTCATAGCTAATAACATTTGAGGATGGAGTC
GGGTAGTAATCTTTCTGGCTAAATATTTCCATGGTTCAGGGTAGCGAATCTTTGAATGGC
TAGAGGCTATGTAAAGCAAACAAAAAGGTTCGCGTAAATCAACGAGCGAATAACACGAGT
ACGGTTGGGGTGGGCTAAAGGGTTCAAGAAATTATCAGTTTCTGTTTACAGTTTTTTTTT
CATTGTTGATAAAAAGATCAAGAATTTCATTATTCGCGAAAATCAAAATGCAGAAAGGAA
AAAATAGAAGGGTAATAAAACAGCATCGGATCGCAAAGATGAGTAAGGAGAACAGCCTGG
TTAACAATTAAAGAGTGTTTATCGAAATTCATTATATAGTGGTTTATATAGACCACTTCT
TCTGCTGGTTGATATAGAAATTTTATTTAATTCTTGTTTTTTACTTATGTACTTACTACG
ATGATCTTAATTCATGCTTCTTGCTTGTCGGCAATGTCCCAAGTGGAAAACCAGTTTAAG
TAGCGGAAGTTACTACTTGGTCCCTCCATACCAAATGATATTGGGGAGAAGTACCAGAAG
CAACCAATTACAAGTGCCATGAATCCGGCGTATAGGACGAACCGCATGATACGGCCGCAC
TTAGATCTGGACCATTTTTGCAAACCGGCGTCGAAACAGTACGCCAAAATGATCAGTGCA
AAATACAAGGCAGGCAAGTAATGATGAACGTAGGTGACTCTAGACATGATAACGAATGGC
ATGTAGTGTAGGCCCCAAGCTAGTAGTGGGTAGAACCCGCCCATTAAGAAAACGTTCCAG
TTAGATGGATTTCTTAGGTCCACATATTGTCTTTGCCATCTGATCAGTAAGATAACGACC
GTGGCCATGAATGCGAGGACGGCAACACTAGAAGCCCACGTGGAAGCTGGGGTACCCAAT
AGGAAGTATTTTGGATTATCATCACCCCAGCCACATAGTCTCAAACCCACATTCAAAGTT
GGCCATTGCCATGCTGAGGAAGCTAAGTAATCAAATTTGTCTGGATCTGGCACCAAAGCG
TTATTAGTGGCCATCATGGCTAGATTTAAATGAATGAAGTCTTTTAAGAAGTTGGTCTTT
GGGTATTGAAAATCTTCGGGTCTTGGTGGCAACCTTTCATTTTCGTGGGTCTCGATGTTC
CACCAGGTCCTCTTGTCCCTCTTGAATGGGTTTTTCATGCAGACAACCTCTTGTTGTCTG
AAACCCCATTCGGGCAAACTGTTACCGGTTTGAGCCAAGTAACAGCCCATCTCCAAGTTC
TTGATACGGAAAGAGGTGGTCAATGTGTGCAACTTCTCAGGGTCTTCATCTCCTCTTTGG
TCCATGATCTCAATAACCCAATTGTCTTTGTTGTCACCAACAACATTGTCACCGTAACCA
GAAACCTCCCATTGTGTCTTTGACACTGGTGCAGCAACTGGGTGGGTGTGCAAGTTTCTG
CCCGTGCTTTTGTGTACCAATCTATAGGAGGTACCTGGCTTCAAATACTCGATGTCAGTT
TCGTTTTCTGACCATGATGGTAAGCCTCTTTCTCTGTTGAAAAACCATTCGTTGTTAGCA
TCTTTGTAACCATAACAGGTTACTTGTTGTTGGTTGGACCCATCTGGATAAGTTTGTATA
TGTGAGTGCAATAGAGATCCTCCAAGAGCTTGGTTTTTGATGGAAACAACGGAGGAACCT
AGAGCAATGTCACGGGGGCCTTGTCCGACGTCAGAACCCACTAATCTTGCTTGGAAAAGA
GATGGCATGTTAGCATCACCTGTACCAGAATGCGATAATAGGTCAAAATGTATTTTGAAG
CACAATAGGAAAATGCAGAAGGGGACGATAATAAGACCAAATATTCTTGCCAACCAGTGG
TTAATATAGGTTTTCCATGACATGGATTTATCTGCCAAAAAGGTCCATAAGTCAATCACA
GTATAGATACCGACCATAGTGATGATAAATAGACCCACCATTTTGACGGAAATAGTGCAA
CCCAAAGAAATACCAGTGATCAACAGCCATTTCCACCACTTTCTAGAGAACGGCTTGGAC
CTCTGGTTGTGGAACATAACAAAACTAAAGAACGATGCGACAGTGAAGAAAAGTAGCATG
GAGTCCAAAAGAATGAACCTGCCCAAAGTACTATACGAGTTTTCAAACAAAACCAACACG
GTCATCAGCCAAACTGTTGGTAAAGAAAATCCAATAGCTTTGGCAGTGAAGTAGGCCAAT
GGCACACAGAGCGCGGAAAATGACGCGTTGAACAGTCTCATTTTAACATAATCCAAATAG
TCTGGGTAAATTTCCCCAGAAGGGAAGTCCCAAGAACCGTTGTAGCCTGCCAAATAACCA
GACAACCCGACCAGCATTTTTCCTAGGGGAGGATGGACATCGTGGTAAAATTCGTGTCTC
AAGTAATAAGAACCAAATTTACCAAAGTGCGCCTCATCCCAAACAACATGGTTGTTGATG
CCGATTTTGTACATCCTGGTAAACAACGCCAATGCAGTAAAGATCACCGGCATTACAACG
GATTCCAGGCGTAACAGTGAGCTTTGTGCAGCGGGCTTTTCCTTCGAGAAATCTTCCGCG
TCTCTCTCATCAGCGCTCGAAAGTTCCTCACTGACGCTGATGGAAGACGATTCTCTTTGT
CTCAGTGTATTCTCTTGCTTAATGTGGGCGGCATTGTTTTTGCTGTACCCGGTAGACGAA
GACGAGGACATGATTGCTGGACCACGGTTCGAAACAGAATGACAGTAGCGATGTGGACTA
AGCCGGTTCTCCTTGGTAATGTTGTTAGTCTCGAGAAATGACCTTTTTTTTACCCTCAAA
AAGAATGCAACACTATTAATAAACAGTACACGAAACGGATCTTTCCGTAAGTTCTTTCGT
TCTTTTTTTTCGTATTCTTTTCTTATGTTTTTTTTTTTCAGGGCGACGTGTCCAATAATA
TGTATGTTTGTCGCTATGTACGAGATATTATTGCTAAGTGACAGTAAATCGTATCACGAC
TGTAAATGATGGCGTTTCGGTATGTACAGTATCTATCTACCTGATAATAAAGTCAATTAT
GAAGACGAATACGTAGCTTATGATGCTGCCCAGAGCTAGTCCTGTAGAAACGAAAATATT
AGTGAATCCACCGGCCGCTTCCTTCTCGTCGTCGTTGTCCAGTTGCTCTGGCACCTTCAT
GAAACTCATAGAGATGACGTGCCCGTTGGTTACGCCGAAAAGGAACTGCAGTAGCATGTA
ACACAAGTCAACGATTACGGAGCCATTGTGCTCTTCATCGCCGCTTGAAGAGGAGGTGAT
GGCTGTGAACATCAAGAACAGTGGTATTGCGGCCACCCGCAACAATGAGTAGATGAAGGT
TTTGCGTGGCGTAAATTTCTGGTCACGGAACATGGGCCAGTCGGCAATGACTCTTCCGTA
AAGGTCGCCTAGGTTCCACAGCGTGAATATGAGAGGTATGTACTGTGCGTTGCTTAAAGG
AAGCCCTGTCACGTAGGTGGCAGACGCAAATACAGGAAAAACAAGAGTTACGACAAACGT
GGTGAATATGGAAAGAACCAGGTACTTTAGTTTGGCAAATAAGACCTCGAAAGGCACTTT
TAGTTGGAGTTCCTCACCTTCGTCGTTGTCGTCGCGAGTGCCGTTGGTGCGGCGGTGGTC
TTCATCCTCCATTTGGTCAATGCGGCCAACAATACGGATTTCCTCCTCATTGGAGCGCAG
AGACCCTAACAACACATCAGTGATATGTCCGTCTTCCACATTCCAATTCTCGTTCACTTT
CCGACTGATTTTGCTCACGCTGAACATGACCACACAAATGGTGACCACGAGTGTTGTGGT
AAAAAAGTATAGAAGAATCCCGCCCGTAGTAGACACAGAAGAGTTCTCGATGAAAGCTAG
GGCAAAAAGCACTAGGGAGGGCAGGACACCAGCAACGGCTTGCCCCACCATGACACCTTG
ACTGTACTCGGAACCGAAGACGTTGGCTATGGCCATGATACCATTCTGTGTCATGGCTGT
CCCCATGGAACTGATCACTACAAGCATCATTATAAACATGAAATTGAACCATTTAGGTAA
AAGGAAATGCAAAATTGTAAAGAAGCACATGACAGTAAAGACAATAATCTCCCACACAAG
CCCGTTTATGACCCTTCTCGAGTATTTGTACTGTCTTTTGGCCAAGTAGATGTTGAACAG
CATTGACGATATGGTAGAAAAGGACATCATAGAGCTTGTGAAGATCTTTGCCCAAATGGA
GGTGTCTTTGAAAATATCGTGCTTAAAATATTGCGAGGCACTGAGGATACAGTTCCACGG
CCATAAAAGACCTATTCCTATGGCGAAAAATGTAATATATGAAAGATTTTTCAACTTTTT
TCTTAACGGCAATGTATCCAGTGGTTCGGTTGACACAGATTGCTCTCTTTCAGAATAATT
ATCGCCTTCTTCATCTGAGTGCTCGTTGTTCTCTGATTCATGTTCTTCTCCAGAGCGTGA
TATCTCCTCTGAATGCGTATCGGCCAGTGCAGGCTCTGGCACCGCAAGGATTGGCTTCTT
GATGGTATCAGTGTCCGCACTAGTACTCATTTTTGCAATCTGGTATGCTTTCTTGCGTTT
GATGATAAGCTGTCGCCGTAACGTAAATCATTCATCCTTTCCTATGATTTTTTAAGTCAA
TTTTTTTTTCTTTTTCGGGAAATTAATTCTGTTTTTGGCATTAATAACAACAAGAAGAAT
TAAGGATTCGTTATAGAATACAAGATTCTTGGTTTGGTTAAATAATTTTGGCTCTCTTAA
ATATTATAAAAAGATACTTAAGTAAGAAAGAAACAGGACGAAAAAGATACGCAAAAGAGA
GAGAGAGAGAGAGAGAAAAAAAAGATGAGAAAAAAAAGTATAACGTGAAGGCTTTATGGG
AAGTGCGGTGAGATTGGGATCGTTTCAATTTTATAATGAGGTAGTGTACAGAGAGGAGGG
AGGGAGTGGGATGAAAGTGTGCGGTTTATACTTTCTTACTGCCTGTGTTTGTCTTCATAA
ATTCAAATCTTGCTAACAATGGTATATGGTCACTGGGGAATTTGTCGTTGGGGAACCCGA
TAAACTTACTCACGTATTCAGGGTCCACTTCACCCAATAGCCCACGCACCCTTAGAGCAT
GTGTAGAAAACCATATATAGTCGATAACATCTGTGAATGACGGTGTGAAATTGGTGAATG
GTAGTTCTCCGATACAATTATAACTTGATTTGAGAGCCAAGTTATGTGAGAAATTTTTCT
CCGACATGTAACCGAAATCTCTACCATTTCCCTCTTGATGTATTTGGACACGGCCTGTAT
TTATCAATTCGTATACGGCGGAGTTGATGTATGAATTGAAGTCACCACAAATGAGCACAG
GAAATTTCTTAATGTCCTGTCTAAAATTGTGCGATGTCTCCTCCTTTAGCAGCGTTTCCA
GATGATCTAACAGGACACCTACTTGGAATGTCTTGACATCATTAAATTTTGGATCCCAGT
GCAAATGCGTGGTGACCGCCCATATGGTGTCGCCACTAGGAATGTGTTGTAGCTTTAAGA
ACAGTGCAACGTTGTCTTTGTTCATTGCACGGTTTAAATAATCTTCAGTTCTTTGGAACT
TCTTGTGTTTCATCCAAGCACCGCTGAAATCCATGGCGTCTTTGGTGATCAACTTGAATT
GGTCCCTTTTGAAAAAAATGCAACACCCGTCCACTTTCTTGGAGTCCTTGGAATGCATGG
TCTTGGCTCTTGCCTTTGCATGGAAGATGCCTGTATAACCGTGCTTGTCCAATAGGGGCA
CCCAATACTCTTCAAAAGTCTTAGACTCCACTTCTTGTAAACACAACAGATCACTGTCGT
ACGAGAGAATCTGCTCCTTTAATTTATTGCGCCTGTAATCCCAACTTAACGCCCACGACG
GTGTGTAACGGTACATTTTTGGGGTGGCATAGTGTTGACATAAGGTGTTGTAGGATAAGA
CGGTGAACGTCCTCTTGGCTAAATCGGTGGCCAGATGCTCAGTGGATTGCTGCAAAGAAT
CGTACTCCCTCTGTGGTTCCCCATCGGTATTGATTTCGATGAACCTACGTTCATGCGGTA
AGGGAATCTCTGGTCTGTTGTCCCTTAGGTAGAAAATCAATCCCGTGACAGATTTTTCTG
TAAGGATCTTTAAAAACTGTTTTTCTAAGGGGTTTCCTTCTACACCAAGAAACTGAAGGT
TACACAGGTTCCCAAACTCCCATGGTAATGTGGTGACCATGTTATCAAAAAAGTAGAAGT
ATTTCAATTGGAAACATGAGCCTAGTTCCGCTGGTAGAGATGTTAACCTATTATGCGACA
GGTCCAAAACGCGTAGGTTGCTTAGGTTCTTGATCTCCGCTGGCAGTTCCGTGAGGCTAT
TGCCATTCAAATATAGTCTCGTTAGAAAATCGTACTTGAAGATGTTGGCGCTGATATTGA
AGATTTGCAAGTTGGACAAATCTAGCGCGTGCCATAATTGGTCGTCGTATTTCGAGTCCT
TGGGCATGACCATTCTGTTTTCAATGTCGTCATCTTCGTCGATGCTGTACTGAGACAGTT
TCTTGTGTTGTAAGAGCGCCTGGTTGGCTTCGTCCTTGCCATTAGCAAACAGCTCTATCT
TGGGAGTCAATGGTGTAGAAACTGCACTGTTAGTTGCCGTGCCTGAGGGAGTGCTATCTC
CCGTAGGTTGTTGTTTCTTTGCTGTCTTGCTGTCGGTGAGAGTGTCGGCCATTTCCATCA
AGGCTTGCTTTGTGCAGTCTACCAGTGATTTGGAGGCTTCTGCAATGTGAGATTGCTGGA
AATCGGTGGGCTGCAAAGCTGGTGGTGCAGCCTGAGGTCCGGGGCCAAATGGGCCCGGGA
CCTGCTGCTGTGCCTGTTGCTGCGCTTGTTGCTGAGCTTGCTGAGCCTGTTGTGTAGCCA
AATACTTCTTCATAGCGTTTTGTCTAGCATAAATGTTGGGTTGCCCCAGAGATTGTGCGG
ACACTGCAGCCAGATGCAATTGAAGCTTCCAGATCGGATTGTTTAGTAAAGAAGGGTCAT
CCAAGTGCGGGTGTAATAAAGGGTTACTGGCGTTCACATTGATGTTCACAGGCGTACCAA
CGGTAGGAACCATCCCTATAGAATTTACTGCGGCTGTGGAGGCATTCATCATCACCCCGC
TTCCACCGCCGTTGTTGTTGTTGTTGTTGTTGTTGTTATTGTTGTTATTGTTGTTATCCA
TGTTCATATTGAGCATGTTCGCGTTCCCATTAGCCAATTGGTCGAGCAACTGGCGCGAGT
TGTTGTTGCTGGAAGTGTGTACATCGCTGTTGTTCATGAGTCCCGGTGGAGGTATCCCGG
TGAGCTGGTTCATGTGTAGCTGCTGCTGTAGAGCGTTTGGTGTACCCTTTCCTAGTAGCC
CGGCATGCTGCTGTTGCTGCTGTTGCTGTTGCTGCTGCGGGCCCACATTAGGGTAGCCTA
GTAAAGAAGGGTCGTTCATTAGCGGTAGTTTGCAGGGATAACGTCAGTCGGAGTTCCCTT
GCTGGTGTCCCTTATGCTGTGCCCTTGTGCTTGAGAACCTTCTCTAAGGTGGAAACTTTT
TCAAATTTTTTCGTTGTTGGCCCGTTTTTCGCAAGTACGGGCGATAACAAAAGGCCTAAA
CGGCTACTTTACCTTTGAGATCTACCACGATGAGAATTAATGCTGAATGGACATCTATGT
ATATGATAGTGGGTATATAGTTACTTATCAGTGCTAGAGCACGATCCACGTGGTGGCACA
TCCGCCAAACACGCGAGGTTTTCCAGAGTATTGGCCCACGAGCTGCAGTCCAGGCTGGGA
GCCCTTTTGCGGGCCGCAGTTGCCATGCTCTCCCCAGCCCCAGCAGTATACATTGTAACA
GTGAGACTTGCCTTCTTGATTAGCAGTAGTTAGAATACCGTGCTCACTCCCGGTTGCAAC
ACCGACAATAGGGAAGTCTAGGCGCTCTTGCGGGAAGAGTTGGGAATGTGTGCCCCTACC
AAACGACTCTACCGTATTGAGGCGCGCATTCCACAGGTGGATCGAGGTCCACATGCACAG
TACCACTAGATTGTGTCTTTTTTGCTGTTGTTTGAGCTCGAACCCAGTGGGCAGGCGACC
GGATGCGTGCACTATGCGGCCGCCCTCGTCCACTATGACCATGAAGTCCTTGCCCATGGC
CACGTAGTCTACGGCCACAGACCCGGTATCGTACACCAATACGGGCTCTTTCAGTGATCG
GGATTTGGGCTCTTGCAATTGACACTTTGTGTTGCTGCCCCAGCCGTATACTCGGGTGCC
TTGCACCACCACAAAGTTCTGGAAACATCCGTATACTGCGATGCGCTCATCGTTGGAATT
CAATGGCACATGTTGCTGAGTGAACTCGTAGCAACCGCCTCCTCTCTGCCATACACGGCC
ATCAGCATCCACAATAACTGTCGTGTCCCAGCCGCACGCCACATCCACCACGGGTGCCGG
TACTTCCACGGGCCTCCAGTCATGCACCTGCCGCAGTGCTTGCGCACTATCCAGTTCTCC
CCGTCTGTTATCTCCACATCCTACCAGATTCCCGTCATTTGTCAGCATCACGCTGTGGTT
CCCACCGCACGCTATCTTCCTGACTATTGCTCCATCATCTCCTGGCACAGACCTCTGTGG
GGTATCCATATCCTCATCGTGCCCCAGTCCCAGTTGCCTTTGCCCATTAGACCCAAACGC
ATACACACAACTCATCGATACAAGCCTGTTATAGCCTTTAATGATCACATTCCATCACTT
GCGCTTTGGATCTGCCTGCATTATCAAGGCTCAAACGGCTGCGTTACCCCCGTCGCCGCG
AAATTTTTCATAATTTTTCACTTTGTAGGATTAAAAGAGATCATGAGCCCATCTCGCAAT
GCAACACGTAACTTAAATCAGTACTGGCGTGTGCTATAGTGCTCTATATTCGAGTTTGTT
GCTACTGGTGGACACCCGACTATCTACAGTAAGGAACGTAAACAAGAAAAAGAGAGAAAA
TACGCTATAGTTGAAAACATGAGTGGTTCGCATTCAAATGATGAGGATGACGTAGTGCAA
GTGCCCGAGACGTCCTCTCCCACCAAGGTAGCATCGTCGTCTCCCTTAAAGCCTACTTCG
CCAACAGTTCCGGATGCAAGTGTGGCGTCTTTGAGAAGCAGGTTTACTTTCAAGCCTTCA
GATCCCAGCGAAGGAGCTCATACTTCGAAGCCGCTCCCATCTGGGAGTCCTGAGGTAGCA
CTGGTTAACCTTGCGAGAGAGTTCCCCGATTTCTCTCAAACTCTGGTGCAGGCTGTTTTC
AAATCTAACTCTTTTAACTTACAGTCTGCCAGGGAACGTCTTACAAGATTGAGGCAGCAA
AGACAAAATTGGACATGGAACAAGAACGCATCTCCCAAGAAGTCAGAAACCCCGCCACCT
GTCAAGAAGTCATTACCACTGGCAAACACAGGCCGTTTATCATCTATCCATGGCAATATC
AACAACAAATCCTCCAAGATTACCGTGGCCAAACAGAAAACGTCCATTTTTGACCGTTAC
TCAAACGTCATCAACCAGAAACAATACACTTTTGAGCTGCCAACTAACTTGAATATAGAC
TCGGAGGCACTGAGCAAGTTGCCCGTGAACTACAACAAAAAGAGAAGGCTGGTAAGGGCA
GATCAGCATCCAATTGGCAAGTCTTATGAGTCATCCGCTACACAATTAGGTTCTGCAAGA
GAGAAACTACTGGCGAACCGCAAATACGGTCGTCATGCAAACGACAACGATGAAGAGGAG
GAAGAGAGTATGATGACGGACGATGACGATGCAAGTGGCGACGACTACACAGAATCCACG
CCGCAGATAAATCTGGATGAACAAGTTTTACAGTTTATTAATGACTCTGATATTGTCGAT
CTCTCGGACCTCTCAGATACCACGATGCATAAGGCTCAACTCATAGCCTCACATAGGCCA
TATTCTTCTTTAAATGCCTTTGTAAACACAAATTTCAATGATAAGGACACTGAGGAGAAC
GCATCGAACAAGAGAAAAAGACGTGCGGCTGCATCCGCCAATGAGAGTGAGAGGCTGCTC
GATAAAATCACCCAAAGTATAAGAGGTTACAATGCAATTGAGTCTGTGATCAAGAAATGT
TCTTCCTACGGTGATTTGGTCACTTCGCAAATGAAGAAATGGGGTGTGCAAGTGGAAGGC
GATAACTCTGAGTTGGACCTGATGAACCTTGGGGAAGACGATGACGACGACAATGATGAT
GGCAATAACGATAATAATAATAGCAACAATAACAATACCGCTGGCGCAGACGCCACTAGC
AAGGAAAAAGAAGATACAAAGGCCGTAGTGGAAGGTTTTGATGAAACTAGCGCAGAACCT
ACTCCAGCACCAGCACCAGCACCAGTGGAAAGAGAAACAAAACGAATTAGAAACACAACT
AAGCCAAAAGTGGTCGAAGATGAAGATGACGATGTAGATTTGGAGGCAATCGATGACGAA
TTGCCGCAGTCTGAGCATGAAGATGATGACTATGAAGAGGAGGACGAAGACTATAACGAT
GAGGAAGAAGATGTGGAATATGATGATGGTGACGATGATGACGATGATGACGATGAATTT
GTCGCTACCAGAAAAAACACACACGTGATCTCCACCACGAGCAGAAATGGCCGTAAACCT
ATTGTCAAGTTCTTCAAGGGCAAACCCAGACTGTTAAGCCCGGAAATTTCACTAAAAGAC
TACCAACAAACGGGTATAAACTGGTTGAATCTGCTATACCAAAACAAGATGTCATGTATC
CTTGCAGACGACATGGGTCTAGGTAAAACATGTCAAGTCATTTCATTTTTCGCATATTTG
AAACAAATAAACGAACCGGGTCCTCACTTGGTTGTTGTGCCATCATCGACGCTAGAAAAT
TGGTTAAGGGAGTTCCAGAAATTCGCACCTGCTTTGAAGATTGAACCCTACTATGGCTCT
TTACAAGAAAGGGAAGAATTGCGTGATATCCTGGAAAGGAACGCTGGGAAATATGATGTT
ATCGTGACCACGTATAACTTGGCTGCAGGTAATAAATACGACGTTTCGTTTTTGAAAAAT
AGAAACTTCAATGTTGTGGTTTATGATGAAGGTCATATGTTGAAAAATTCCACTTCAGAG
AGATTTGCCAAACTGATGAAAATTCGTGCCAATTTCCGCCTTTTATTAACTGGTACGCCA
TTACAAAATAACTTGAAGGAACTAATGTCGCTGTTGGAATTTATCATGCCAAATCTTTTC
ATTTCCAAAAAGGAATCATTTGACGCAATCTTCAAACAACGTGCCAAGACCACAGACGAT
AACAAAAATCACAACCCGCTATTAGCGCAAGAAGCCATTACAAGAGCTAAAACGATGATG
AAGCCATTTATTTTGAGAAGACGTAAGGATCAAGTGTTGAAACATTTGCCACCAAAGCAC
ACGCATATTCAGTATTGTGAATTGAACGCAATACAAAAAAAAATATATGATAAGGAAATA
CAAATCGTGTTAGAACATAAGAGAATGATTAAAGATGGCGAATTGCCAAAAGATGCAAAA
GAAAAGTCTAAATTACAATCTTCAAGTTCCAAAAATTTAATAATGGCATTGCGAAAGGCC
TCTCTGCATCCACTTTTGTTCAGAAATATCTATAATGATAAAATCATCACTAAAATGAGT
GATGCCATATTGGATGAACCTGCTTATGCTGAAAACGGTAACAAAGAGTATATTAAGGAA
GATATGAGCTATATGACGGATTTTGAGTTGCACAAACTATGCTGCAATTTCCCGAACACG
TTATCCAAATACCAACTTCATAATGACGAGTGGATGCAATCTGGGAAGATAGACGCTTTG
AAAAAATTGCTGAAAACAATCATTGTTGACAAACAGGAAAAGGTGCTGATATTTTCCTTA
TTCACTCAAGTCCTGGATATTCTAGAGATGGTTTTGTCCACCTTAGATTATAAATTTTTA
AGATTAGATGGTTCCACGCAAGTGAATGATAGACAACTACTAATAGATAAGTTTTATGAA
GATAAGGATATTCCCATTTTCATCTTATCAACAAAGGCAGGTGGATTCGGTATTAATTTG
GTGTGCGCAAATAATGTTATTATATTCGATCAAAGTTTTAACCCACATGATGACAGACAA
GCTGCTGATAGGGCACATCGTGTGGGACAAACAAAGGAAGTTAATATAACCACTTTAATT
ACTAAGGATTCCATAGAGGAAAAGATTCATCAACTGGCCAAAAATAAACTAGCTTTAGAT
TCGTATATCAGTGAAGATAAAAAATCTCAAGATGTGTTGGAAAGTAAAGTTAGTGATATG
TTGGAGGATATAATTTATGATGAAAACTCGAAACCGAAGGGAACCAAAGAATAAATAAAT
AAAAATATAGTAAAAAAGTAAATAGATAAGCAGAAAATAAACCAAAAAAATAACATATTT
ATTTTCTTCTGCGTGAACGCACCATGTGGAAAAAGAGAGTTGATAGAACAAAGGACAAAG
AAATTTAGAACGGTAAAAATATTTTCTAGAGTATAATATACATATATGTGTATATATACA
TAGGTTAGTATGTATAGCTAGGTAATTTTAATCTGGGGAGAGAAATGGTGAACTTTTTTC
AATTTATTGATTCGGTTGTTGATTGATATCTTGTGGTGCTGCTTCAATTTCAGCTTGAGT
TTCTACTAAATTTTCAGGGACCATTGGATGATCAAGGTTAAATAAAACGCTACCAATAGT
ATTTGTAGAAATGGCAAAGCCCGCTAAAATGGGCACGGACTCAATCAAACCGGCCAAGAA
ACCAAATGAGGCATATTGGCCAGCGTGGAGATAAATATTTTCACGTCTTTGTATGTTGTC
GAAATTTTGTAAACGTAAAACTTTCGTGAAGTAAATTTGAGTGATGAAAGGAGAAATTAA
AATATGAAAAAGGATTGGTCCAATAAGTGGGAAAAAAGATATAACCAACAGCACAAAAAG
AACCGACAGGCCTAACATGTACTTGACCAACTTGAATGGGAAATAGTAAGCCCAGAAATA
TATCGAGTTAATAGGTGCATAGTACTTGATTGGTTTGACTTCACTCAAATTCTCCTCTAA
ACCATTCTTCTCTAAGCACACCTCCACTAAATGATTATTAAAATGACTGAGTCTCATAAA
CAATAAAGTGAAAACATTTGCTTGCAAAAAGGAATGAAAAATGGCAATGAAAAGCCCAAT
AGGGCCCAGCACAATCAAAAAAGCTGTGTACATTGGCGTAATTGTAGCCCAATACACAAA
GCTTACCAGGGCAAACATTATCAAGTAACTCGATAATATACCTAACATAGTCGTTGAGTA
ACTGCTCTTATTGGTGTTGAACTCTAAAAACCCTTTGAACGGGTACATGAATGCACCTCC
TGTGAATGCATCTTTGAAAAAGTTCATTAGCACGTATCTGGTACGGCTCATAACTTTGCT
GAAGTGCTTCTTGTAAACTTTATCCAAGTACTGATTGAAGGGGATGTTGACATATGGCAG
TTTTTCATACGATTGGCCTCCGCCAAACTTGTACACCAAACCACCAATACCTGCCAGCGC
TAATGAACCTGTAAAACTCATTTCCTGTTGTTGTTATTGTTTGTATAATGTACCTTTGTT
CCCTACACTATAACAACACTTATTCGTGGCAAGAACGAAAATAAAAAATGATTTGAAACT
TCCTTTTCCACATCTATATCTATATATATATGTATATGTATAATACTTATTACTATGATA
TTATTCCATGTGTCACAAAACCAGAAAGATCCCGTCGTATTATTGAGTCACGTGCTTTAT
TCCATGGCGGGTAATAAATATTAAAACAAGGGTTTTTTAAGTAAATGATTACATGCTAAG
GAAGTGGTGAATAAGATTTGGCAAGGGGCAGGTCGCTAACCACAACATAGCATTCGTTGA
AAAGGAAATCAACGTTACAAAGTGCAGTTTTTTGTATTATTTTCCTATTATCCTCTTCTT
TTCCTTTGTTTCAGGCGTCGTTGCACCTTTTTGCTATACAAAAGCTCATAAAAGATTAGA
AACCCCGGATATCGTCACAACAGCGGTATATTATAGTTATTTTGCATCTTTTTGGTAAGT
CAGAAATTAGAAACAGTAGCTTACCAATTGAGTGAAAGTTTCCGTTCGTCATCTCCCTCT
TTTGTTTTTTTTCACCTTTGTTTTTCTGTTTCTTCTATTTTTGTTTTGTTTTGTTTTGTT
TTGTTCTCTCCCTAATTTGCATATAGGTAAACATCAAAGAAGTAATGCCCTACATCGGTG
CTTCCAACCTCTCAGAACATTCATTTGTTAATTTGAAGGAAAAACATGCGATTACACATA
AAGGTACGAGCAGTTCTGTAGCATCTTTGCAGACACCACCGAGCCCCGATCAAGAGAACC
ATATTGACAATGAATTAGAAAATTACGATACGTCTTTAAGTGACGTTTCAACCCCGAATA
AAAAGGAAGGTGATGAGTTCGAGCAAAGTTTAAGAGATACATTTGCGAGCTTTCGGAAGA
CTAAACCCCCACCTCCTTTAGATTTTGAACAACCAAGACTTCCTTCGACAGCTTCTTCAT
CCGTTGATTCAACCGTATCATCGCCCTTAACGGATGAAGACATAAAGGAGTTAGAGTTTC
TTCCGAATGAATCAACTCATTCTTATTCGTACAATCCACTTTCGCCAAATTCCCTGGCAG
TCAGATTGAGGATTTTGAAGAGATCATTGGAAATCATAATACAAAACCCAAGTATGCTAC
TGGAGCCTACTCCAGATGATTTGCCTCCTTTGAAAGAGTTTGCGGGCCGTAGGAGCAGTT
TACCAAGGACATCGGCTTCTGCAAACCATTTAATGAACAGAAATAAGAGCCAGATTTGGA
ACACTACTTCCGCTACTTTAAATGCATTTGTAAATAATACCTCTTCCTCCTCAGCAGCAT
CTTCTGCTTTATCTAACAAAAAACCGGGCACCCCAGTTTTCCCTAATTTGGATCCAACAC
ATTCTCAAACATTCCATAGAGCCAACTCGTTGGCTTATTTACCTTCCATCTTACCTGAGC
AAGATCCGCTGCTCAAACATAATAATTCTTTATTTCGTGGCGACTATGGAAACAACATAA
GTCCTGAAAGGCCAAGTTTTAGACAACCCTTCAAGGATCAAACTAGCAATCTCCGCAATA
GCAGTTTACTCAATGAGAGGGCATATCAGGAAGATGAAACTTTTTTACCGCACCATGGAC
CCTCTATGGATCTATTGAATGAACAAAGAGCGAACTTGAAAAGTCTTCTGAATTTATTAA
ACGAAACACTGGAGAAAAATACTTCCGAGAGAGCTTCGGATCTTCATATGATATCGTTGT
TCAATTTGAATAAACTAATGCTTGGAGATCCCAAGAAAAATAATTCAGAACGCGATAAAA
GAACTGAAAAGCTTAAAAAGATTTTGCTGGATAGTCTTGCAGAACCATTCTTTGAGCACT
ATAATTTTATTGGAGATAATCCGATCGCAGATACAGATGAACTAAAGGAGGAAATTGATG
AATTTACAGGTTCTGGAGATACGACAGCGATAACAGATATACGGCCCCAACAGGACTATG
GCCGCATATTGAGGACATTCACTTCTACCAAAAATTCCGCCCCACAGGCAATTTTTACAT
GTAGTCAGGAAGACCCTTGGCAATTCAGAGCTGCGAATGATCTAGCGTGCTTAGTATTCG
GTATCTCACAGAATGCCATTCGCGCTTTAACCTTGATGGATTTAATTCACACCGATAGCA
GAAATTTTGTTTTACACAAATTACTTTCTACGGAGGGTCAAGAAATGGTTTTCACAGGCG
AAATCATTGGTATAGTTCAACCAGAAACACTCAGCTCATCCAAAGTAGTATGGGCATCGT
TTTGGGCAAAAAGGAAAAACGGCTTATTAGTTTGTGTTTTCGAAAAGGTTCCTTGCGATT
ATGTTGATGTACTTTTGAACCTGGATGATTTTGGGGCCGAGAATATTGTAGACAAATGTG
AGTTATTATCAGATGGACCCACATTGTCTTCCTCTTCTACATTATCGCTACCTAAGATGG
CTTCTTCACCAACTGGTAGTAAATTAGAGTATTCGTTGGAGAGGAAAATCCTGGAAAAGA
GTTATACTAAGCCTACTTCAACAGAGAATCGCAACGGCGATGAAAACCAACTTGATGGAG
ATAGTCATTCTGAACCATCGCTGTCATCATCGCCAGTAAGGTCGAAGAAAAGTGTAAAGT
TCGCAAATGATATTAAAGACGTCAAGAGTATAAGCCAATCGTTAGCCAAATTAATGGATG
ATGTGAGGAATGGGGTTGTATTTGATCCCGATGACGACCTTTTGCCTATGCCCATCAAAG
TTTGCAACCACATTAATGAAACAAGATATTTTACTCTAAATCATCTATCTTATAATATCC
CATGCGCGGTTTCCTCCACTGTGTTGGAGGATGAGCTGAAATTAAAGATTCACAGTTTAC
CTTACCAGGCGGGTTTGTTTATTGTGGATTCGCATACTTTAGATATTGTAAGTTCCAATA
AATCTATTTTAAAAAACATGTTTGGTTATCATTTTGCTGAGCTGGTGGGAAAATCCATTA
CTGAAATAATTCCTTCTTTCCCAAAATTCCTCCAATTTATAAATGACAAATATCCTGCGT
TGGATATCACACTCCATAAAAATAAAGGTTTGGTATTAACAGAACATTTTTTTAGGAAAA
TTCAGGCAGAGATTATGGGTGATCGTAAAAGCTTTTATACGTCGGTGGGTATTGATGGCC
TTCATAGGGATGGCTGTGAAATCAAAATTGATTTCCAGCTGCGTGTCATGAATTCTAAAG
TGATTTTGCTTTGGGTTACACATTCGAGAGACGTGGTATTTGAAGAATATAATACAAATC
CATCTCAATTGAAGATGCTGAAGGAGAGTGAATTAAGTTTAATGAGCAGTGCAAGTAGTT
CTGCCAGCTCTTCCAAAAAATCTTCGTCTAGGATATCCACCGGGACATTAAAGGACATGA
GTAATCTGTCAACATATGAGGATTTGGCCCACCGAACGAATAAGCTTAAGTATGAAATCG
GAGATGATTCTAGAGCACATTCTCAATCTACTTTGTCCGAGCAGGAACAAGTTCCCCTGG
AAAACGATAAGGACAGTGGCGAGATGATGCTTGCAGACCCCGAAATGAAGCACAAGTTAG
AATTGGCCAGAATTTACTCAAGAGATAAATCTCAATTTGTGAAAGAAGGAAATTTTAAAG
TTGACGAAAATTTGATTATTAGCAAAATTTCACTTTCCCCAAGCACTGAATCCTTAGCAG
ATTCTAAAAGTTCTGGGAAAGGGCTTTCTCCACTTGAAGAGGAAAAGCTAATTGACGAAA
ACGCTACAGAAAACGGATTAGCGGGATCACCTAAAGACGAAGACGGAATCATAATGACTA
ACAAGCGAGGAAACCAACCTGTTAGTACTTTCCTACGCACCCCCGAAAAGAACATCGGTG
CTCAAAAGCATGTTAAGAAGTTTTCGGACTTCGTAAGTCTGCAAAAAATGGGTGAAGGTG
CATATGGTAAGGTCAACCTATGTATTCATAAGAAGAATAGGTATATTGTGGTGATTAAGA
TGATTTTTAAAGAAAGAATCCTTGTAGATACATGGGTTAGAGATAGGAAATTAGGCACTA
TACCTTCTGAGATCCAAATTATGGCCACGTTGAACAAAAAACCACATGAGAATATTTTAC
GGTTACTGGATTTTTTTGAAGACGACGATTACTATTATATCGAAACTCCCGTACATGGTG
AAACAGGATGTATAGATCTTTTCGATCTAATTGAATTTAAAACCAACATGACCGAATTTG
AAGCAAAATTGATATTCAAGCAGGTTGTAGCGGGAATAAAACATCTACACGACCAGGGTA
TTGTTCACAGAGATATCAAGGATGAGAATGTTATCGTAGATTCTAAAGGCTTTGTTAAGA
TTATTGATTTTGGATCTGCTGCGTATGTCAAAAGCGGACCATTTGATGTTTTTGTTGGGA
CAATAGATTATGCTGCCCCTGAAGTCTTAGGAGGAAACCCTTATGAGGGCCAACCACAGG
ATATTTGGGCTATTGGTATTCTATTGTATACGGTGGTCTTCAAAGAAAACCCCTTCTACA
ATATAGATGAAATATTAGAAGGCGACCTGAAATTCAATAATGCAGAGGAAGTTAGTGAAG
ATTGCATTGAGTTAATCAAGAGTATTTTGAACCGTTGCGTACCGAAGAGACCCACCATTG
ACGACATAAATAACGACAAATGGTTGGTTATTTGAAGGATTAATGATCATTCTAGGACAT
TAGTAATTGGAAAAGAAAATGCAAAAAAATATCCAGTAGAAACAATGCTTGGTATGTCGT
TCTTCTTACTTTCTTCAGTAATGAGTTGGTAGTTTTCTCTATTTAAATATGAATAAATCA
ATATGTACTTTCTTTCTTTAATCAAAATGTTAATATGATAAAAATACAGCATCCAAAGCA
GTTAATCAAGACTTAAATATAAAAAATTTACATATTTAGAAAACAAAGATAGGGTAAATA
TTGAAATTACATAGTAAACCATACCTTAAAAGCAGAAATACTGATACCACATGAACTATT
GATCAATACTACTGCTATTCTCTTCCTAATGCAAAGAGCTTATTACCATTATTAAATCAC
TACAGACGATAATACCCGGAATGCCCTTTTTGCAGGGAAAGCGAAAAAGGTGAAAGAGTT
AACAGGAGAAAGTGTTAGGGAACTAAGTTACGAAGGAAGGCAGATAGCAACAATACTAAC
GTGGAACTTATTTCGACGACTATAACAACTGGTATCTGATTATCGAAGAATAATTGAGTG
GTCAGAAAGGAGCGAAATATGTCTGGAGCAAGATCAACAACGGCAGGTGCCGTGCCCTCG
GCAGCAACAACATCAACAACATCAACAACGTCAAACTCTAAGGACTCAGACTCTAACGAG
TCATTATATCCCTTGGCTCTGCTTATGGATGAGTTAAAACATGATGATATTGCTAATAGG
GTAGAAGCCATGAAAAAACTAGATACCATCGCGTTGGCACTCGGTCCCGAAAGAACAAGA
AACGAGTTGATTCCCTTTTTAACGGAAGTTGCACAAGATGATGAAGATGAGGTGTTTGCC
GTTTTAGCCGAACAGTTAGGAAAATTTGTCCCCTACATTGGCGGTCCTCAATACGCCACA
ATCCTATTACCAGTTTTGGAAATTTTGGCATCTGCAGAAGAAACTTTGGTTAGAGAAAAG
GCCGTAGATTCTCTGAATAACGTGGCCCAAGAACTTTCTCAAGAACAATTATTTAGTGAC
TTCGTCCCTTTAATTGAACATTTAGCTACTGCAGATTGGTTTTCTTCAAAAGTTTCTGCT
TGTGGTCTTTTCAAGTCTGTTATTGTTAGAATCAAAGATGATTCATTGAGAAAGAATATC
CTGGCTTTATACTTACAACTCGCTCAAGATGATACTCCAATGGTGAAAAGGGCCGTCGGT
AAAAACCTGCCCATCTTGATCGATCTGTTGACTCAAAATTTGGGATTATCTACAGACGAA
GATTGGGATTACATTTCTAACATTTTCCAGAAAATCATTAACGATAATCAAGATTCTGTC
AAGTTTCTGGCAGTTGATTGTTTAATTTCCATCTTGAAATTTTTTAACGCTAAAGGTGAT
GAGTCTCACACTCAAGATTTATTGAACTCTGCTGTCAAATTAATTGGTGACGAAGCGTGG
AGGGTACGTTACATGGCTGCCGATAGATTTTCAGATTTAGCCTCGCAATTCAGTTCCAAC
CAAGCATATATCGATGAATTAGTACAACCATTTTTGAACCTTTGTGAGGACAACGAGGGA
GATGTTAGGGAAGCTGTGGCTAAACAAGTTTCTGGGTTTGCCAAGTTCCTAAATGATCCT
TCAATTATATTGAATAAGATCTTACCTGCTGTGCAGAATTTGAGTATGGACGAAAGTGAA
ACAGTGAGATCTGCTTTGGCTTCTAAGATTACAAATATTGTATTACTGTTGAATAAAGAT
CAAGTCATTAACAATTTTCTTCCGATTTTACTGAATATGCTAAGAGATGAGTTCCCTGAC
GTTCGTTTAAATATCATTGCCAGCTTGAAGGTTGTCAATGACGTAATAGGAATTGAGCTG
CTATCAGACTCTTTGTTACCTGCCATAACAGAATTAGCCAAGGACGTGAATTGGAGAGTT
AGAATGGCTATAATTGAGTACATACCTATCTTGGCAGAACAATTAGGTATGCAATTTTTT
GACCAACAGTTAAGCGATTTATGTCTTTCATGGTTGTGGGATACTGTTTATTCTATCAGA
GAAGCCGCAGTGAATAATTTAAAAAGGTTAACGGAAATATTTGGCTCTGATTGGTGTCGT
GATGAAATTATTTCAAGACTGCTCAAATTTGATCTACAATTACTGGAAAATTTTGTCTCG
AGGTTCACAATACTCTCTGCTCTAACCACTTTGGTGCCCGTGGTATCGTTAGATGTCGTT
ACTGAGCAACTATTACCATTCATTTCTCACTTGGCTGATGACGGTGTTCCAAATATTAGG
TTTAATGTGGCCAAATCCTACGCTGTGATAGTGAAGGTTTTAATTAAGGACGAGGCCAAA
TATGATGCATTAATTAAGAACACAATTTTACCCTCATTGCAAACGCTGTGTCAAGACGAA
GATGTTGATGTAAAATACTTCGCTAAGAAAAGTTTGGCAGAATGTCAAGAACTTTTAAAA
AATTGATACTAGTTCAAATATATACATACATACACATATGTACACTTGAATGAATAAAAA
GTATACATATTAACAACTAGGCCTGCTTTCTTTTCTTTTCTTTTTTTTTTTTTTTACCAC
ACTTAGTCCTCTACTTTAACAGAAATATCATTTTCCAGTTTGACCATAGTTTCTTCAACT
GTTTTCTCCTCGTGTTTAACATTGATTTCCGCCTCCACGTTCAGTTCACGTTTTCCTTCC
AGGTATTTCACCCACTTTGGATAACTCATGATATTTTGCTGGATTTCCTTGTACAATTGA
GACTGCAAATCCCAATCTAAGGAGCTTCTGGGATCATCCGGTGGCAAGAATTGTAACATG
TCACCAAGGTTCCTCGATTTAGTGATTATTTGTCCAAATCCAACCAGCAACCCATTTATT
TCTGTCCAAAGCCCCTTAGGCAGCCAATTTTGTAATTGAGTTCTTGTCTGATCTGGAGTC
TTGCATTTCTGCGCATCTACCCATTTCCAAAGCTTGGTCAATCTATCCACGTGAACGTCA
ACGCAGATACCTTCAATCTTGCCCCATGCCTTTTGTAATGTTAGATAAGCCATTTTGGGC
CCTACACCGGGCAGGCCCAATAGCTCATTAATCGTAGCTGGAACATCACTCGAAAACTGA
TCTTGAAGGATTTTGCAGGTTGACAAAATATACTTGGCCTTCCTTGTGTGGAACCCAACT
GAATGAATCAATTCGTCTAATTTGGTCTCATTGATTTGTAAAACGGCCTCTAATGTCATA
CCTTCTTCGCTGTGCAGTTCGTCTATACAATACCGCATTATGTTAAGCATTGCCATTGCG
GTAACTTCATCTTTTGTTTGCGATGATAGCATCACCCCAAGAAGGACCTGTAATCTGTAG
TCCCTCGGTGATATCTGCTCTTTCGAGATACCACACTTAGAGGCAACCGTTACAGGAATG
GATGATCCACCAATTATATCGACGGGGGCTAGAATCTTAGATCTCAGTACTCGCATTCTA
GCGTATGTTTCTTGAAACTTGTAAGGGACTTTCGTCGAGGCCGGAGTGACAAGGATCGAG
GGGTCCAATGGTGTGGCCCACCTGTTGGGCACATTGCCGTTTCTAACCACAATCCATTCG
AAGTACTGCTTATTTGGCAGCGATTTAACCCAGTCGATATCCACGGGTTGAGGGACAACC
TCTTCTTGTTTGATTTTGGTCCTTTTCTCCGGTAGGAGTTCTGATTCTGGCCCAGTTTCA
GTCTTTACCAGCGGTCTTTTCCTCAGAATTGCCATAGATGAGTATTTACTGATCTTTTGC
ATATTTTTTTTTTTTTTGGGCTATAAAGTATATATAGATACAAATATATGATGAATCATT
AAAGAGGAGGTTATTACTAAGTGAAAGAAAAAGAAAAAAAAAAAGATCAAAACCAAACTT
CGTATTCGAGCCTAAAAAACAGAATATAATGTTATAATACTAATAGAAGCAACAGGAGCA
CCACTATCAGCACAAGAATAATCACGCAGTTGCCGTTATCCTTGAACCTAGAATTGTTAA
AGCCATGCATGGACCGAGAGGCCCTGTTCAAATTCCTACCATTATTATCAATCAGGTTTT
CTAAATCAACCAGCAGCGAGTCGTTCTGAGAAACGATCTCATTATTAAGGTCCAGCGAAA
TGTCATGAGTCCTCCCAATAGACTGAGACAGTGCGCCCAAGTGGGAATCTTGCTCTAACA
ACTGCTGTTGCTGGTTAATAAATAGTTCTTGGTTGGAAACCATGGGTTGTGGTGGCTGTG
GCTGTGACTGTGACTGTAACTGCGATTGCAATGGTTCATCCTTGTATGGAGTATGCGTCG
AAGGCAGCGGCGACTCCTCGTCTTGTTCATCGTCATCCTTATACATGACCGTAAGCTCGT
CATCATTCTTGAACCGCACTTTTTTCAAAGACTCTTTGGACACCTCATCAGTATTTCTTG
CCACCTGCTGTTGGAACCTATACAACTCCTTGTCAACCGCCGTATCAGGAATTTTGTCCA
GTATGGTATTGTATCGGGATATTAGTTCATCATTGGGCGCACACTTCTGCAATAACTCCA
ATATTGAGCCCAATTGCCGTTTCAAAGTAACGTTATCGTTTGAGGTCGGGGCGAGCTTCA
ACACCGACACTAGCCTTGTTCTTTCTTCGACCAGATCAGAGAGCTGGTCCAGTTCATAAC
CCAGCTTCAACACATCCATACCGTGTGTGCTTACGCATCTATTTGCTGTCGTGAGATCTG
TCTCTATGCTTTATTCGTTTTCCATTGTAAAGTCTCAGCATTTATTTCTTGTTCTTTACT
TGTTTTTGCCCTTTCGGGTGATCAAAGTCGTGCTGGGAAATTTTATTCTTATAAAATGAT
TTTTAGAAATAATAAACTCATAACAGTGCAACGGCAAAGTACAAGGGAAGGAAGCACAGA
AGCAAGAGGAGGCGCATCGATCGTGGCAGATGAGTCAGCAAACACCACAGGAAAGTGAAC
AGACCACAGCGAAAGAACAGGACCTTGATCAAGAGAGCGTGTTGAGCAACATTGACTTCA
ATACGGATTTGAATCACAATTTGAATTTATCGGAATACTGTATATCCAGTGACGCAGGAA
CAGAGAAGATGGATAGCGACGAGGAGAAGTCGTTGGCCAATCTGCCGGAGTTGAAATACG
CTCCCAAGCTATCCAGCCTGGTGAAGCAAGAGACGCTCACCGAGAGCTTGAAAAGACCAC
ACGAAGATGAGAAAGAGGCGATAGATGAGGCCAAGAAGATGAAAGTGCCGGGAGAGAACG
AGGACGAAAGCAAGGAAGAGGAAAAGAGTCAAGAACTGGAAGAGGCAATTGACAGCAAGG
AGAAGAGCACCGACGCCAGGGACGAGCAAGGGGACGAAGGTGATAATGAGGAGGAAAACA
ACGAGGAGGATAATGAAAACGAAAACGAGCATACAGCACCGCCTGCGCTGGTGATGCCCT
CCCCCATCGAAATGGAGGAACAGAGGATGACTGCGCTGAAGGAAATCACCGACATCGAGT
ACAAGTTCGCGCAATTGCGCCAAAAACTATATGACAATCAATTGGTGCGGTTGCAAACGG
AGCTGCAGATGTGTCTGGAAGGGTCACACCCGGAATTGCAGGTCTACTACTCGAAGATTG
CCGCGATCCGTGACTACAAGCTACACCGAGCGTACCAGCGACAGAAGTACGAGCTTTCAT
GCATCAACACAGAAACAATCGCTACCAGGACATTCATTCACCAGGACTTCCACAAGAAGG
TCACCGACCTGCGAGCCAGGCTGCTGAACAGAACCACGCAGACCTGGTACGATATCAACA
AGGAGCGCCGCGATATGGATATAGTCATCCCAGATGTCAATTACCACGTCCCCATCAAAC
TTGATAACAAGACGCTGAGCTGTATCACGGGCTACGCCAGCGCAGCACAGCTGTGCTATC
CCGGCGAGCCCGTGGCAGAGGACCTCGCTTGCGAAAGCATCGAGTACCGCTACAGAGCCA
ACCCGGTGGACAAACTCGAAGTCATTGTGGACCGAATGAGGCTCAATAACGAGATTAGCG
ACCTCGAAGGCCTGCGCAAATATTTCCACTCCTTCCCGGGTGCTCCTGAGTTGAACCCGC
TTAGAGACTCCGAAATCAACGACGACTTCCACCAGTGGGCCCAGTGACCGCCACACTGGA
CCCCATACCACTTCTTTTTGTTATTCTTAAATATGTTGTAACGCTATGTAATTCCACCCT
TCATTACTAATAATTAGCCATTCACGTGATCTCAGCCAGTTGTGGCGCCACACTTTTTTT
TCCATAAAAATCCTCGAGGAAAAGAAAAGAAAAAAATATTTCAGTTATTTAAAGCATAAG
ATGCCAGGTAGATGGAACTTGTGCCGTGCCAGATTGAATTTTGAAAGTACAATTGAGGCC
TATACACATAGACATTTGCACCTTATACATATACACACAAGACAAAACCAAAAAAAATAT
GACTCTACAAGAATCTGATAAATTTGCTACCAAGGCCATTCATGCCGGTGAACATGTGGA
CGTTCACGGTTCCGTGATCGAACCCATTTCTTTGTCCACCACTTTCAAACAATCTTCTCC
AGCTAACCCTATCGGTACTTACGAATACTCCAGATCTCAAAATCCTAACAGAGAGAACTT
GGAAAGAGCAGTTGCCGCTTTAGAGAACGCTCAATACGGGTTGGCTTTCTCCTCTGGTTC
TGCCACCACCGCCACAATCTTGCAATCGCTTCCTCAGGGCTCCCATGCGGTCTCTATCGG
TGATGTGTACGGTGGTACCCACAGATACTTCACCAAAGTCGCCAACGCTCACGGTGTGGA
AACCTCCTTCACTAACGATTTGTTGAACGATCTACCTCAATTGATAAAGGAAAACACCAA
ATTGGTCTGGATCGAAACCCCAACCAACCCAACTTTGAAGGTCACCGACATCCAAAAGGT
GGCAGACCTTATCAAGAAGCACGCTGCCGGCCAAGACGTGATCTTGGTTGTCGACAACAC
CTTCTTGTCCCCATATATCTCCAATCCATTGAACTTCGGTGCAGACATCGTTGTCCACTC
CGCTACAAAGTACATCAACGGTCACTCAGACGTTGTGCTCGGTGTCCTGGCCACTAATAA
CAAGCCATTGTACGAGCGTCTGCAGTTCTTACAAAACGCCATTGGTGCTATCCCATCTCC
TTTCGATGCTTGGTTGACCCACAGAGGTTTGAAGACTTTGCATCTACGTGTCAGACAAGC
TGCCCTCAGCGCCAACAAAATCGCTGAATTCTTGGCAGCAGACAAGGAAAACGTTGTCGC
AGTCAACTACCCAGGTTTGAAGACACACCCTAACTACGACGTAGTGTTAAAGCAACACCG
TGATGCCCTTGGTGGTGGTATGATCTCCTTCAGAATCAAGGGTGGTGCTGAAGCTGCTTC
CAAGTTCGCCTCCTCCACAAGACTGTTCACATTGGCCGAATCCCTTGGTGGTATCGAATC
TCTATTGGAAGTGCCCGCTGTGATGACCCACGGTGGTATCCCAAAGGAGGCCAGAGAGGC
CTCTGGTGTTTTTGACGACTTGGTTAGAATCTCTGTCGGTATTGAAGACACTGACGATCT
TTTGGAAGACATCAAGCAAGCCTTGAAACAAGCCACCAACTAATCGCCAGTGCCACGTCT
CTGCCTTCGACCGGACCTTTTTAAGTACGATAAATATCCTTTTATAAATATATAGTCTAA
AATATCCATTAATACTGTGCTCAATCAATCGTGTTAGATGATTTAGTTTTTTCCAAATCG
TTATTATAGTGCAGAAGTAGTATACATAAAGGCATATGCATGCGATTTGGAAGTAACGCT
CGCCGTAGACAAGTAAGAATGCCTGCTGTCTTGAGAACCAGGTCCAAAGAATCCTCTATA
GAGCAGAAGCCTGCTTCCAGAACTAGAACGAGATCAAGAAGGGGCAAGCGTGGTCGTGAC
GATGATGATGATGACGACGATGAGGAAAGCGATGATGCATACGATGAAGTAGGTAATGAC
TATGACGAGTATGCTTCAAGAGCGAAGCTGGCCACCAATAGGCCCTTCGAAATAGTCGCG
GGACTGCCTGCTAGTGTGGAGCTGCCCAACTATAACTCTTCGCTTACTCATCCGCAATCA
ATTAAAAATTCTGGGGTGCTTTACGACTCTCTGGTCAGTTCCAGAAGAACCTGGGTTCAG
GGTGAGATGTTTGAACTGTATTGGCGAAGACCTAAGAAAATTGTTAGTGAATCTACCCCA
GCAGCGACGGAGAGTCCAACATCTGGAACGATTCCTTTGATTCGAGATAAGATGCAGAAA
ATGTGCGATTGTGTAATGAGTGGAGGTCCTCACACGTTCAAAGTTAGACTTTTCATACTG
AAGAATGACAAAATCGAACAGAAATGGCAAGATGAGCAAGAGTTGAAGAAAAAGGAAAAG
GAACTGAAACGAAAGAACGATGCAGAGGCCAAAAGATTGAGGATGGAGGAAAGGAAAAGG
CAGCAGATGCAAAAGAAAATAGCCAAGGAACAAAAACTTCAATTGCAGAAGGAAAATAAA
GCCAAGCAGAAGTTGGAACAGGAGGCGCTGAAGCTAAAAAGAAAGGAAGAAATGAAAAAA
CTAAAGGAACAAAATAAAAATAAACAGGGTTCACCTTCTTCCTCCATGCATGACCCAAGA
ATGATAATGAATTTGAATTTGATGGCACAAGAAGATCCAAAACTAAACACTTTAATGGAA
ACCGTCGCAAAGGGTCTTGCCAATAATAGTCAACTGGAGGAATTTAAAAAGTTCATTGAA
ATTGCCAAAAAAAGGTCACTAGAGGAGAACCCAGTTAATAAGCGTCCATCTGTCACAACA
ACGCGACCTGCACCTCCCTCTAAAGCTAAAGACGTAGCCGAAGATCACCGGTTAAACTCG
ATAACCTTGGTGAAAAGTTCCAAAACCGCTGCCACGGAACCTGAACCAAAAAAAGCTGAT
GACGAGAATGCAGAGAAGCAACAGTCCAAAGAGGCAAAGACAACTGCCGAATCGACTCAA
GTAGATGTCAAGAAAGAAGAAGAAGATGTGAAGGAAAAGGGTGTGAAATCAGAGGATACA
CAAAAGAAAGAAGATAATCAAGTGGTACCGAAAAGGAAAAGAAGAAAGAACGCAATAAAG
GAAGATAAAGATATGCAATTGACCGCGTTCCAACAGAAATACGTTCAAGGTGCGGAGATC
ATCCTGGAGTATTTAGAATTCACCCATTCGAGGTATTACCTGCCTAAGAAATCAGTAGTA
GAATTTTTGGAGGATACGGATGAGATTATAATATCTTGGATTGTTATACACAATTCTAAA
GAAATTGAGAAGTTCAAAACCAAGAAAATAAAAGCTAAACTGAAAGCCGACCAAAAACTA
AACAAGGAGGATGCCAAGCCAGGCTCTGATGTGGAGAAGGAAGTCAGCTTTAATCCTCTT
TTTGAAGCCGATTGCCCTACCCCTCTCTACACCCCAATGACAATGAAGTTATCGGGGATT
CACAAAAGATTTAACCAAATCATCCGAAATAGCGTTTCTCCAATGGAAGAAGTTGTTAAA
GAAATGGAAAAAATTCTGCAAATTGGTACTAGATTGTCTGGCTATAATCTGTGGTACCAA
TTGGATGGATACGATGATGAAGCTTTGAGCGAAAGTTTGCGGTTCGAACTAAATGAGTGG
GAGCACGCCATGAGAAGCAGAAGACACAAAAGATAAGGTGTTCGGTTACTTTATTCTGCT
TTAACGCCATTATGATTATACACATTGTATTACTTATTTTTTAACCTGTATATTAAAACC
TTTATTTTATTTCACATTACTCATCATGTGGAGTACTGGAATTGTATGCCAAACTTTGCC
GGGAAAACTGGTATATTGCCGTTTTCTGTATCAGTTGCTGATATAGATATTGCATTATCA
TTCTTTTCATCATCGGATAAACTTTCTTGAAAGCCTCTAGTGAATACCAGCTCTGTCCCG
GCAGATATTAAAAATCCCCTCCATTTGCCTTCCCATAATAGTTTTAAAGTCTTGTCACGT
AATGACGTGCTTAATTTCCAAACACTGGTAAAAATGGAACTATTTATTTTGTTATCAAAT
TTTTCGATGGTAGATCTTTCTTCATCGATTTTTCTTAATGACGACGAGAATGCATAAGTT
AAATCATTTAATAGCTTTTGTTTGTGAACAGGTATATCTAGTGTAGAAGGAATATCGTTA
ACAGCTGAATTCAGATCCGGTACATTTTCGTGCAGTAGTTTAGTCGCTCTGCTGTTTGGA
TTTATATCAACCAATTCGTCGGAGATTGGTTCTAATTTATCATTATTGTTTTTATTGGTT
TCAAGCAAATGATGCTTTTTTTGCCAAAATTCGCACCCAAATGAAAGATTTGATTCAATC
GAATAAAGATTAAAATCATACTTCGCGCAAAAAGTAGAATTTGTCCCTGTCTTGGCCGAA
TATGTGGAGGATATATGGCCGAATAATGGATTCCAAGATAATGTCAAAGTTAGTGGTCGT
CCTGTGTTTGTAGAATGTGTGTAATATCTTAAAGTTGTCGAACAACCGGGGCTTAAACTT
ACTAACCCTAACCAAAATTCAGCACCAAGCGACAACGAAGAATTATTGTACAGTGAGGTG
TTAAACTTGGAAGGCGTGGTAAGGAAATTGTGTAATACTCTATAACCACATAATAGATCA
CTGGTGGAAAATATCCACTCCTGTAAATTGCGGTGAGAATCTCTTTGAAAATAGCACGTT
AAAACGTTTAAGCTTTCTTTGAAACTACTGACACCCTTAAGCATAAATTGGGTTTGTGGA
CTTAGTCGTTTTATTATCATTGCTTCTAAATCAGAGCTGGGGTAGTACATTCTACCATAA
TAAAGGGATTTTTTAACAAATTTCGAGTCATGTAGTAATTTCTTGTCATTGTCGACTGTG
GTGTTGTCACTACTCAACGTATTCGCACTACTAACACTGAAATTGAGGTTTGGTTGCAAT
TGTCTGTATGTTTCGGTGGCATCTTGTAATGGGATATCAGTAGAGTTGCGCATGAATTTC
TCCAATTGCTGTGCATCGGAGTATAAATAACTCAGAGAACCATTTATCCTGGACCTCGTA
GAAAAATCTAAAGAATTGAATGTATTGGGAGTAGATTTGTTGGAAATTTGCAGGTGTATT
GCTGAGGGAATTCGGAAATCTAATAATGTTCTCGATGTGGCCGTTATATCCTCGTAGCTA
TTTTGCGTACTCCAATGGGTGCTCTGATAAAATGCCCTTAGTACTTGGTCCATATAGGGT
AGCATCAAGATCGGTCTTCTCTGTTCGTGTCTTTTTCCTAACGTATATTTGCTTTGTTTC
TTCACTCAACAATAAAGTCAAAGTAAAATTAAATACTAATTATTCTTAAAAGGGAAGATG
CGAAATTTAGCGAAAATCTATTGATTATACACACAAAGGAAGAAAGGTAGTGGAAAGCTA
AATAAAGGAGGTCATGGAGCCAGAGAGCATAGGCGATGTGGGGAACCATGCCCAGGATGA
TAGTGCCAGTATAGTGTCCGGGCCTCGCAGGCGTTCTACTAGCAAGACATCCAGTGCGAA
GAATATACGGAACTCCAGTAATATCTCTCCAGCATCGATGATTTTCAGGAATTTGTTGAT
ACTGGAGGATGATTTAAGACGCCAAGCTCACGAACAAAAGATACTGAAGTGGCAATTCAC
TTTGTTCTTAGCGTCTATGGCCGGTGTAGGCGCATTTACCTTCTACGAACTTTATTTCAC
TTCAGATTATGTCAAGGGCCTCCATAGGGTTATTTTGCAATTCACTCTTTCTTTCATTTC
CATTACTGTAGTTCTTTTTCATATCAGTGGACAATATAGAAGAACTATCGTCATTCCAAG
AAGATTTTTTACCTCTACTAATAAAGGGATTAGGCAGTTTAATGTGAAGCTAGTTAAAGT
ACAGTCTACGTGGGACGAGAAATACACAGATTCAGTAAGATTTGTGAGTCGAACAATTGC
TTATTGTAATATTTATTGTTTGAAAAAATTTCTGTGGCTTAAAGACGATAATGCCATTGT
GAAATTTTGGAAAAGTGTCACGATACAATCCCAACCGAGGATCGGAGCTGTGGATGTGAA
ATTAGTCCTCAACCCCAGAGCATTTAGTGCAGAGATTAGAGAAGGATGGGAGATTTATAG
AGACGAGTTTTGGGCCAGGGAAGGTGCTAGAAGACGCAAACAAGCGCACGAACTCCGACC
TAAATCAGAATGAAAGAGTTGGAGGGCTTCTTCCTTCGAATAAGAGGTCATATTTACCTA
TGTAAAATTGTAACCATCTATGTTCACACATAAATTATATTTTATACATTATTAGAAGTG
AAGCTGTTGTGTCGTGAAAATTTTACAAATCCGTCATTTCATATTTAAGTTTTCCAACAA
GTGCTAGAAAACCTAGGGGTTGTTGAAATTGGTTAAACAAGGCATCTTATTATACATACA
ACAGCATAACGCTAGAGGGGCAAGAAGGAAGAACTTAAAATAATAGGTGTAAAATGACTT
TGGCTTTTAATATGCAACGGTTGGTGTTTCGTAATTTGAATGTTGGGAAGCGCATGTTCA
AGAACGTCCCCTTATGGAGGTTTAATGTCGCCAATAAATTAGGAAAGCCCTTAACTCGCT
CTGTAGGGTTAGGCGGTGCTGGCATAGTTGCTGGTGGCTTTTACTTGATGAATCGCCAGC
CTTCTAAGTTGATATTCAATGATTCTTTAGGGGCAGCTGTCAAACAACAGGGTCCCTTGG
AACCAACTGTGGGCAACAGTACGGCAATTACCGAGGAAAGGAGGAACAAAATAAGTAGTC
ACAAGCAGATGTTTTTGGGATCATTATTCGGTGTTGTTTTAGGAGTTACGGTGGCTAAGA
TATCAATTTTGTTTATGTATGTCGGTATTACAAGCATGCTTCTTTGTGAATGGTTACGGT
ACAAGGGATGGATTCGCATTAATTTGAAAAATATCAAATCTGTAATTGTTTTGAAAGATG
TAGACTTGAAGAAACTGCTTATTGATGGGTTATTGGGTACAGAATACATGGGTTTTAAAG
TATTCTTTACATTGAGTTTCGTATTAGCAAGTTTAAATGCTAACAAATGAGCAAGACAAA
TGACCAGATATAAACGAGGGTTATATTCTTTCGTTTTATACTTTTTTATTTTTGGTATTT
CATTTATCCTATACAGTAAATATACATAGGGCTAAGGAAGAAAAAAAAATCACGTCGAAT
ATAAACCTAATTGTGTTCTATATTGCGGACATATATTTTTCGTAGATTGAAAAGTTCTTA
AACGTAATTTTTTTGACGACCAGTGAAGAGGAATTGAATAAGTAGAACTTGGGCAATACT
TATAACGGCAATGATAATGATAATCAATATAGATAACCAAGTCAACCTTGATTCGGTGGA
ATTGACGGTAGACATGTTTCTCCATTCTCTGGCTCTCAAATAGTTCAAAGTCTTCGTGAT
TTTGTTCAAGTTTCTATCTATTTCCTCCACGGCGTTATTGGCAATAATGTCATCGTTATT
GACATCAGCTTCATGCTCGTCAGTCAAAGTTTTTTCCTTTTCTAGTGTAATTTCTACCTT
TTTCAACGCTGTACCATAGTTATTGGAAAAACAAAAGGTATACTTCCCCACTCCAAACGA
TTTTAATAAAAAGTCTGAGTACTTCTTTTGTTTCTCACTAGTAATCACAGATCCATCAGG
AGCAGTAATATCAAAATCAATCTCAAAATTACCACCGGTTAGAACTTGGTAACCCACAGC
CAGGGAATCATCCTCAGTAACCATATCGTAGTACAGGCATTCTTTGCTGAATGCTGGTAA
ACTGATAGCAACTGGTGCATAACTGGAAGATGCAGCCACTGAATTGACCAACGCCAAAAT
TAAAACAATGAAGAAAGAGGGTAGAGCAATTGTAGATTTGATCATGGTTTTCCTTTACAA
TGAGTGTACTCCACTGTTTATCTTATTCTAGTTTGGGTCACCTGATGCAGAATTGGCGGT
GTCGATCCCTAAGGTTAATGAATCGAAATCACTGGAGATTTTGTTAGTTTTTCATTTTAA
CTAGTTCAAGTTTTGGCAGAATGTACTTTTTCGTGTTTCGGGACACGTCGCTGAAAAGGA
TTGAAATATAACCAAACGCCATCATGTAAGGTGCAGTGAACATTAGCGCTAAGAGGATTG
AGGATTGCTTTATGAAAGTTTATGAACATTTTCTTGAATTAAATAAATAAGTCTGAAAAC
ACTTGAATTCGAGATGCTGTAGCAATTTGTAATATTATTTAAAGTTCACAGAGTGGCTTC
CTTGGCGGATCTGAAAAATAGGTAGTGATTTAAGGCTATATAATATTAGATACACAAAAC
ATACCAGAAATTTTCCTCGAAGACCAGCAGAAGGGAACCAATATCACGACATTAAAATAT
TGTTATCTCTTTTTATTCAGTGCTTGTATTTCAGCTTCCATTGAAAACGATGACTGTCTT
CTCAATCTTCATGTCGAGCCCTCACACTGTACATGATAATATACTAGTACCATGAAAACT
AGTCGATAGATGATAATTGATTTTTATTTGAAATAGAATCTTTAATGATCACAGTGGATC
TTTTAAAAACTTGGTGAGATAGTGCTAGTGATCCGTAGTCTAAATGAGTTACGTACGAAA
GGGAGCCAAAAGCAATCTGACCAATTTGTATATATATACATCTATCCGAAAAGGAAGACA
TCAATTAGTACGGGCGTGTGGTCTAGTGGTATGATTCTCGCTTTGGGCGACTTCCTGATT
AAACAGGAAGACAAAGCATGCGAGAGGCCCTGGGTTCAATTCCCAGCTCGCCCCGAATAA
TTTTTTTTTGCCTATCTATAAAATTAAAGTAGCAGTACTTCAACCATTAGTGTTAGCGAT
AATCAAGAAGTGAAACTCTTTCTCTATTTTTTTTTTAATTGAAAAATTTCCTTTCTCTAT
AGCGTATAGAATATATGTTACATGTATATATATATATAAAGTAAAAACGTTCGGAAAATT
CCTCATTATACCCAGATCATTAAAAGACATTTTCGTTATTATCAATTGCCGCACCAATTG
GCTTAATCAACTTCTTCAACGGTTGGACCTTCAGCCTCTGGAGCTGGAGGAGCACCACCT
GGGAAACCGCCTGGAGCACCACCTGCAGCGCCACCTGGAGCACCACCAGCTTGGTACAAC
TTAGACATGATTGGGTTGGCAATGTCTTGCAACTCCTTCAACTTGTCATCGAATTCTTCC
TTGCTGGCAGTGGTGTTGCTGTCTAACCAAGAAATAGTCTCTTCAGCCTTCTTGGTGACG
GTGTCCTTGTCAGCTTGTTCCAATTTGTCACCAGCTTCAGAAATGGTGTTCTTCAAAGAG
TAAGCAATGGATTCCAATTGGTTCTTGGAAGCAATTCTTTGAGATTCCTTTTCATCTTCT
TCCTTGAATTTTTCGGCTTCAGCAACCATCTTTTCGATATCTTCCTTGGACAATCTACCC
TTGTCGTTGGTAATAGTGATCTTGTTAGACTTACCAGTACCCTTTTCGACGGCGGAAACA
TTCAAAATACCGTTAGAGTCGACATCGAAAGTGACTTCAATTTGTGGGACACCTCTTGGA
GCTGGTGGAATACCACTCAATTCGAACTTACCCAACAAGTTGTTGTCCTTAGTCTTGGCT
CTTTCACCTTCAAAGACTTGAATCAAGACACCTGGTTGGTTATCAGCATAAGTGGAAAAG
ATCTCGGACTTCTTTGTTGGAATGGTAGAGTTTCTTGGAATCAACTTGGTCATGACACCA
CCAGCAGTTTCAATACCCAAGGATAATGGAGCGACATCCAACAACAATAGATCTTGAGTC
TTGGAAGATTCGTCACCAGTCAAAATAGCAGCTTGAACAGCAGCACCGTAAGCAACAGCT
TCATCTGGGTTGATAGATCTGTTTGGTTCCTTACCGTTGAAGTAGTCAGTGACCAATTTT
TGGACCTTTGGAATTCTGGTAGAACCACCGACCAAGACAATTTCATCGACTTGAGATTTG
TCCAATTTAGCATCTCTCAAGACCTTTTCAACTGGGTCCAAAGTAGATCTGAACAAGTCA
GCACACAATTCTTCGAATCTGGCTCTGGTGATGGAAGTGTAGAAATCGATACCTTCGAAC
AAAGAGTCAATTTCAACGGAAGTTTGAGCGGAGGAAGACAAAGTTCTCTTGGCTCTTTCA
CAAGCGGTTCTTAATCTTCTCAAAGCTCTTTGGTTGGTAGACAAGTCCTTCTTGTTCTTT
CTCTTGAATTCTTGGATGAAGTGGTTGACCAATCTGTTGTCAAAATCTTCACCACCCAAA
TGGGTGTCACCAGCGGTGGCCTTAACTTCAAAGATACCGTCTTCAATGGACAACAAAGAG
ACATCGAAAGTACCACCACCCAAGTCGAAAATCAAGACGTGTTCTTCCTTACCCTTCTTG
TCCAAACCGTAAGCAATGGCAGCGGCGGTAGGTTCGTTAATAATACGCAAGACATTCAAA
CCAGCAATGGTACCAGCATCCTTGGTAGCTTGTCTTTGAGAATCGTTGAAGTAAGCTGGG
ACAGTGACGACAGCGTCATTGACCTTGGCTCCCAAGTAAGATTCGGCAGTTTCCTTCATC
TTACCCAAGACCATGGAGGAGATTTGTTCTGGGGTAAAGTTCTTGGTTTCACCCTTAAAT
TCAACTTGAATTTGAGGCTTACCGTCAACATCGATCAACTTGAATGGGAAGTGCTTCATG
TCAGCCTGCACTTCTGGGTCGTTGAAGTTTCTACCGATCAAACGCTTAGCGTCGAAAACG
GTATTCGAAGGATTCATAGCAGCTTGATTCTTAGCAGCATCACCAATCAATCTTTCAGTG
TCAGTGAAAGCGACAAAAGATGGAGTGGTTCTGTTACCTTGATCGTTGGCAATAATGTCC
ACACGATCATTAGCAAAGTGAGCAACACACGAGTATGTTGTACCTAAATCAATACCGACA
GCTTTTGACATATTATCTGTTATTTACTTGAATTTTTGTTTCTTGTAATACTTGATTACT
TTTCTTTTGATGTGCTTATCTTACAAATAGAGAAAATAAAACAACTTAAGTAAGAATTGG
GAAACGAAACTACAACTCAATCCCTTCTCGAAGATACATCAATCCACCCCTTATATAACC
TTGAAGTCCTCGAAACGATCAGCTAATCTAAATGGCCCCCCTTCTTTTTGGGTTCTTTCT
CTCCCTTTTGCCGCCGATGGAACGTTCTGGAAAAAGAAGAATAATTTAATTACTTTCTCA
ACTAAAATCTGGAGAAAAAACGCAAATGACAGCTTCTAAACGTTCCGTGTGCTTTCTTTC
TAGAATGTTCTGGAAAGTTTACAACAATCCACAAGAACGAAAATGCCGTTGACAATGATG
AAACCATCATCCACACACCGCGCACACGTGCTTTATTTCTTTTTCTGAATTTTTTTTTTC
CGCCATTTTCAACCAAGGAAATTTTTTTTCTTAGGGCTCAGAACCTGCAGGTGAAGAAGC
GCTTTAGAAATCAAAGCACAACGTAACAATTTGTCGACAACCGAGCCTTTGAAGAAAAAA
TTTTTCACATTGTCGCCTCTAAATAAATAGTTTAAGGTTATCTACCCACTATATTTAGTT
GGTTCTTTTTTTTTTCCTTCTACTCTTTATCTTTTTACCTCATGCTTTCTACCTTTCAGC
ACTGAAGAGTCCAACCGAATATATACACACATAATGGCATCCACCGATTTCTCCAAGATT
GAAACTTTGAAACAATTAAACGCTTCTTTGGCTGACAAGTCATACATTGAAGGGTATGTT
CCGATTTAGTTTACTTTATAGATCGTTGTTTTTCTTTCTTTTTTTTTTTTCCTATGGTTA
CATGTAAAGGGAAGTTAACTAATAATGATTACTTTTTTTCGCTTATGTGAATGATGAATT
TAATTCTTTGGTCCGTGTTTATGATGGGAAGTAAGACCCCCGATATGAGTGACAAAAGAG
ATGTGGTTGACTATCACAGTATCTGACGATAGCACAGAGCAGAGTATCATTATTAGTTAT
CTGTTATTTTTTTTTCCTTTTTTGTTCAAAAAAAGAAAGACAGAGTCTAAAGATTGCATT
ACAAGAAAAAAGTTCTCATTACTAACAAGCAAAATGTTTTGTTTCTCCTTTTAAAATAGT
ACTGCTGTTTCTCAAGCTGACGTCACTGTCTTCAAGGCTTTCCAATCTGCTTACCCAGAA
TTCTCCAGATGGTTCAACCACATCGCTTCCAAGGCCGATGAATTCGACTCTTTCCCAGCT
GCCTCTGCTGCCGCTGCCGAAGAAGAAGAAGATGACGATGTCGATTTATTCGGTTCCGAC
GATGAAGAAGCTGACGCTGAAGCTGAAAAGTTGAAGGCTGAAAGAATTGCCGCATACAAC
GCTAAGAAGGCTGCTAAGCCAGCTAAGCCAGCTGCTAAGTCCATTGTCACTCTAGATGTC
AAGCCATGGGATGATGAAACCAATTTGGAAGAAATGGTTGCTAACGTCAAGGCCATCGAA
ATGGAAGGTTTGACCTGGGGTGCTCACCAATTTATCCCAATTGGTTTCGGTATCAAGAAG
TTGCAAATTAACTGTGTTGTCGAAGATGACAAGGTTTCCTTGGATGACTTGCAACAAAGC
ATTGAAGAAGACGAAGACCACGTCCAATCTACCGATATTGCTGCTATGCAAAAATTATAA
AAGGCTTTTTTATAAACTTTTTATAATTAACATTAAAGCAAAAACAACATTGTAAAGATT
AACAAATAAATGAAAAAAACAACGAAATAACTTAGGTTTTAGGCTAAAAAAAACAGAAGG
AATTTTGAACGATAAACTTTTCGACTGCACACGAAACATTATTACTAATTTGTGTAACCA
CTATATAAGGAATCGTGTTTATTAATTGAATTTATTCCGGGAATATTCAAGTTATGTATA
TCTCTTTTCATATTCTTAAATACACATACTCATAATATCTTGTCGAAAATACGCGGTGTA
GGGAGTTATGGTGGATAACTTTTTCACGATTAGAAGAAAAGGAAAATTTCATTATTCGTA
GCTTAACATGGCAAAAACGAGAAAGACATATAATCAAAACGTGAGTTTCCTGTGGAAAAA
AAAAAAAGGGAACCTCTGGTTACGATGATATACCTGCGTGAAAAAGGACAGTTATTACCA
ATACATACAAAGGCTTAATAAGTGTAAAATATATATCTGCCGAGACCATTACTCATTACA
CCTAGAATGGAGCAAAATGGCCTTGACCACGACAGCAGATCTAGCATCGATACGACTATT
AATGACACTCAAAAGACTTTCCTAGAATTTAGATCGTATACCCAATTAAGTGAAAAACTG
GCATCTAGTTCTTCATATACGGCACCTCCCCTGAACGAAGATGGTCCTAAAGGGGTAGCT
TCTGCAGTGTCACAAGGCTCCGAATCCGTAGTCTCATGGACAACTTTAACACACGTATAT
TCCATCCTGGGTGCTTATGGAGGGCCCACGTGCTTGTATCCGACAGCCACGTATTTTTTG
ATGGGCACTTCTAAAGGATGCGTACTCATTTTTAATTATAATGAACATTTGCAGACAATC
CTAGTGCCGACCTTATCTGAGGACCCTTCTATTCACTCAATAAGAAGTCCAGTGAAATCA
ATTGTCATATGTTCCGATGGTACTCATGTAGCTGCCTCATACGAGACCGGAAATATATGC
ATTTGGAACTTGAACGTAGGGTATAGAGTGAAACCCACTTCTGAACCAACAAATGGTATG
ACCCCAACGCCTGCCTTACCGGCAGTCTTACACATCGATGACCATGTGAACAAGGAAATC
ACAGGGTTAGACTTTTTTGGTGCTCGGCATACAGCCCTGATTGTTAGTGATAGGACAGGT
AAAGTATCACTCTATAACGGTTACAGAAGAGGCTTTTGGCAGTTGGTGTATAATTCAAAA
AAAATTTTAGATGTGAACTCTTCCAAGGAGAAATTAATAAGGTCAAAGTTGTCTCCACTA
ATATCACGGGAGAAAATTTCCACTAATTTGTTGAGTGTACTCACAACTACACATTTTGCC
CTTATTTTATTATCGCCACACGTTTCTTTGATGTTTCAAGAAACTGTTGAACCCTCAGTA
CAAAATTCTCTAGTCGTGAATAGCTCTATTTCATGGACTCAAAACTGTTCCAGGGTTGCT
TATTCCGTAAATAATAAAATTTCTGTTATTTCCATATCTTCATCAGACTTCAATGTTCAG
TCCGCTAGCCATTCTCCTGAATTTGCAGAATCTATATTATCCATTCAATGGATTGACCAG
CTCCTACTTGGTGTTTTAACCATATCGCACCAATTTTTGGTATTGCACCCCCAACATGAC
TTCAAGATCCTGTTAAGATTGGATTTTCTGATTCACGATTTGATGATCCCACCTAATAAA
TATTTTGTAATAAGTAGAAGAAGTTTCTACCTGTTAACAAACTACTCATTTAAAATTGGC
AAATTTGTGTCTTGGTCAGATATTACTTTAAGACATATTTTGAAAGGCGACTACTTGGGT
GCATTGGAGTTCATAGAATCACTTTTGCAACCTTACTGTCCACTGGCAAACTTGTTGAAG
CTAGATAATAATACGGAAGAGAGGACTAAGCAACTTATGGAACCATTTTACAATCTGTCC
TTGGCTGCCCTAAGGTTTCTTATAAAAAAAGATAATGCCGACTACAATAGGGTTTACCAA
TTATTAATGGTAGTTGTTCGTGTTTTGCAGCAATCTTCCAAAAAACTAGACTCAATTCCT
TCTCTAGACGTCTTTTTGGAACAGGGTCTGGAGTTCTTTGAATTGAAGGACAACGCGGTA
TATTTTGAAGTTGTAGCAAATATTGTTGCCCAAGGATCAGTTACGTCAATTTCCCCAGTT
CTTTTCAGGTCCATAATTGATTACTATGCTAAGGAGGAGAATTTAAAAGTAATTGAAGAC
TTAATCATCATGTTAAATCCTACTACGCTTGATGTTGATCTTGCCGTCAAACTATGCCAA
AAGTATAATTTGTTCGATTTATTAATATATATTTGGAACAAGATCTTTGATGATTATCAA
ACCCCAGTGGTGGACTTGATATACAGGATTTCTAACCAAAGTGAAAAATGTGTGATCTTC
AATGGTCCTCAAGTACCTCCTGAAACGACTATATTTGATTACGTAACGTATATCCTTACT
GGCAGGCAATATCCACAAAACTTGTCTATATCACCAAGTGATAAATGCTCCAAAATACAA
AGGGAACTTTCAGCATTTATTTTTAGTGGCTTCTCCATAAAATGGCCGTCGAACAGCAAT
CATAAACTTTACATATGCGAAAATCCAGAAGAAGAGCCAGCATTTCCTTACTTTCACCTT
TTATTGAAATCGAATCCGAGTAGGTTCTTAGCAATGCTCAATGAAGTGTTTGAAGCGTCC
TTGTTTAACGATGACAATGACATGGTTGCATCAGTTGGAGAAGCAGAATTGGTAAGTAGG
CAATATGTTATTGATCTACTATTGGATGCTATGAAAGATACGGGAAATTCAGACAACATC
AGGGTACTTGTTGCAATTTTCATTGCAACTAGTATATCAAAATATCCTCAATTTATTAAA
GTGTCTAACCAAGCCCTCGACTGCGTTGTTAATACCATATGCTCCTCTAGGGTTCAAGGT
ATATATGAAATTTCTCAAATAGCTCTGGAGTCGCTTTTACCCTATTATCATTCAAGAACA
ACAGAAAATTTTATACTGGAACTAAAAGAAAAAAATTTCAATAAAGTTCTTTTCCATATC
TATAAAAGTGAAAATAAGTACGCCAGTGCGCTTTCACTTATTTTAGAAACTAAGGACATC
GAAAAAGAATATAACACGGACATTGTATCCATAACCGACTACATACTCAAAAAATGCCCA
CCTGGAAGTTTAGAATGTGGCAAAGTTACTGAAGTTATCGAGACGAACTTTGATCTTCTT
CTCTCAAGGATCGGTATCGAAAAATGCGTCACAATTTTTTCTGACTTTGACTATAATCTT
CATCAAGAAATCCTGGAAGTAAAGAATGAGGAGACTCAGCAAAAGTATTTGGATAAGCTT
TTTTCTACGCCAAATATCAACAATAAGGTCGATAAGCGTTTAAGAAATTTACACATCGAA
TTGAACTGTAAATACAAGAGCAAAAGGGAAATGATTCTTTGGCTTAATGGTACAGTTCTC
AGCAACGCTGAGAGCTTACAAATTCTGGACTTATTGAATCAAGACTCTAATTTTGAAGCT
GCAGCTATAATTCACGAACGCTTGGAAAGTTTTAACCTAGCAGTCAGGGATTTATTAAGT
TTTATTGAACAATGTCTAAATGAAGGGAAAACAAATATATCTACTTTATTGGAATCTTTG
AGGAGGGCCTTTGATGATTGTAATTCTGCTGGTACCGAGAAAAAATCGTGTTGGATATTA
TTGATTACATTCCTGATCACTCTATATGGGAAATATCCTTCACACGATGAAAGGAAAGAT
TTATGTAATAAACTACTTCAAGAAGCATTTTTGGGATTGGTTAGGTCCAAGAGTTCCTCT
CAGAAGGATTCAGGTGGGGAATTCTGGGAAATAATGTCTTCTGTTCTTGAGCACCAAGAC
GTTATTTTAATGAAAGTTCAGGATTTAAAGCAACTGCTACTGAATGTTTTTAATACTTAT
AAATTGGAAAGATCTCTTTCTGAGTTGATTCAAAAGATTATAGAGGATTCTTCGCAAGAT
CTTGTTCAACAGTATAGAAAATTTCTGAGTGAAGGGTGGTCTATACACACCGACGACTGC
GAAATCTGCGGGAAAAAAATATGGGGAGCTGGTCTGGACCCATTACTTTTTCTAGCTTGG
GAAAATGTACAGCGCCACCAAGATATGATTAGTGTAGATCTCAAAACTCCCCTTGTCATA
TTCAAATGTCACCATGGCTTTCACCAGACTTGCCTCGAAAACTTGGCCCAGAAACCCGAT
GAATATTCTTGTTTAATTTGCCAGACGGAATCTAACCCAAAAATAGTATAACATTTCTAA
ATATTTAATACAACTTTGGTTACATAAAAGTAAAATTTATACACCTCATTTCATTATGTA
GATTCATATATAGAATACCAATTATGATTGACCCAATAGCCATCAAAATCAGTAGTTATT
AATACTTGTCTTTCTAGGAGCCATTTGCATATTTCTGATATTTCATGAAGCGAAAGTACT
TCACGACACCTAGATTGCAATCTACTCAATGTTATCCCTGGATGAAATATTATTTCGTTA
ACGACCATAGTAACTACCTGCTTCCATATGTTTGGCCTAATGGAACCAGATCCATTCACC
CATAAACGAGAAAATGGTTTGCCCAGTGGAACTTTGACAGCAGACTTCCTTGCTGTATTC
AATTTTGTCTGAGAATTGGCATATATAATCAGAGGGGGAGTTAATGTTCGTATTTCAAAT
CTCCTTGAAGTATACGTTAAAGGTCGAACATTTCTCACCATTGGAATTACATCCATATTC
AATAGCTCTCCCGAAATCAAATCAATTAAAACCCAAGAGGATATATCGGACGGCTCTTGA
TTGATAACAATAGCGTTTCCGGCCTCCAATAATTCATTAACCTTACATCTATACTGAAAA
GCTACACCAAAATCTTTATAATTTCCTCTATTTTCCAAAATGTCTGGTAAAGTATCAGTA
CATTCAAGTTTTGAGCCATGGAGATAAATTTGCTTTTCCTTAGCCATATCCATGATGACG
TTATCTATTGATTCGTTTCCAACGTTCTTCAACGCCTCTATTTCATTTCTAGTGGTCGAA
GGACTTTCTATTAATATGGACCGGATCACTGTGCGAATATAATCGTCGCTTTGACTCTTC
GATAAGTCCTTAGTAGAAGCGGAAATCTTTCTAGTGTAAGTTTTTTTTAAAGAAGAGATC
TCTCTTTGAATCATAGAAGACATGGCCAGATCGTTGCCAGAATGTGTAAGTGTGTCATCA
CGTACCAGAGTAAATTTTTTTCTATTCTCTTCGTAGTTCTTATAAAGAAAGAGCGGCCTT
TTTATTTCCTTTTCATCAAAAGAGGTCCAAATATCAAGCAATTTGATAAGATCTAGTTCT
TCAACATCCCTCAGTGAAATCTTTTCACTTTTAATGGCTAGAACGAGCATTTTTTTCCAC
TTATCGACATATGCCCTCCAACCACTATGACCCATTCTTACTCGCCGTGCCGTCCATTTC
TTTTTTAGGTTATCTAAAGAATTATTAGGAAATAATTTTGTTATTTTGTCCCACATTATT
TCATTTTTAATACTTTTAGTAACTACAACAGCTCTGATTAAAGCCTGAACACCATCTTTA
GTGCCTGCATGATAGACAGTTTTGTCTTCTTTAGTATTTTCCACGACCACCGTTGTCCTA
CCAGCAGACACTTTTTTGTCTCTCCTTTTGATCTTTCCATCTGATACGTTGACCGACGTA
CTCTTCTTAGAGATAGCGTCATCTGAAGCTTTGATCTTAGCATTCTTTTGGCGGTTCTGA
AACTTACGAATTCTTTCAACTGATTTCTTTCCTCTGTGAAACCTATTTTTTTCCGTTTGG
TCAAAGAAGTATATTTCCGTATCATGTATAACATCAGTAAAGGTTGCTTTTTTACTATCT
TTTTCTTTCAGGATGTACCTTTGGATAGCGTCCTCTCCAACAGTGGGCAAAAAAATAATT
TTTCTTCCTGATACAGGCTCTGTTCTGGCTCCTAATTTTTCGCTTTCTACCATCAAATCA
ACATCACCACGGACAGTCTTTTTATCTAATGTCGTTGTGGAGCCCATATATTTAGAAACG
CTTTCGTAAAATTGTTCTCTCAGGTATGCTACCCCACCAATCGTATTCATAACTTTCAAA
ATGGCTCTCTGTCTCTGTAGTGAACGCAAAGAGCGGGCAGAAAAGCCGCCGAAGTTAACC
ACCTTGCCTTTGACAACAGTGCCTCCGTTTGAACTTGGACTATCTTCAGCAGATTTCGGC
TCCTGTGCAGTGCTGACATGCTGCTCTAGCTTAATCCTTTTGGGATTCGAAATGTTTCCT
GCAACAGAAGCATTAGTACTGTTTTTAACCTGCCTCTTCCGTTTGTTTTTATTCGGAGTT
TTTTTTGAGTTTGGGGGAATTTTTAATTCACCGTGCCAGAAGAATATATCCTGTCCATCG
CTGTCCGTTGTAAATCTAACAGTGTTGTTGAGTGCGACGAAATTATCCTCGTTGAGAGTT
TTCAAATCGGTACGAGATTTGCCTAGCTCATCAAACCCTTTTGGAACGGATATTTCGTCT
TCCGCATTTGTTAACTTTTGAAAGTTCTGAGCTGTGAACAGCCTAAAAAACTTCTTCTTT
CCCTCAAAATCGTATATGCGAAAAAGCCTATACCCCCCTGTATTTTCTTTTTGCTTATCC
ACACTTTCTAAATAATATTCGCTTGATTTGGTAAAAGCTCGCTGAAATTCTTTTCCGGTA
ATTCGATTTACAACATCCATAGTTGAAATTCCTTTAAGGCCAGACTTATCTGCAATGTCA
TAAGTCTGATTTTGAAGTGGATAAAATCGATTAAGAAGAACTTCATTCTTTACAGCATCC
TCTTTCTCTTCCATAACAAGGCCTTGATTTTGTAATAAATCAGTCGCATTGAAATTATCT
AAACCTTCGACTAAGTCTTCATCTTCGAAAGCTGCCTTGCTATCTGATACAGAATCTTCA
TCCGCGCTATTGCTATCATACTCAAATGAAGGCGAGCCTTTAGAGTCTGGAATATCTTTC
ACGTATTTTACACATCTGATTTTAATGGCAGGATTCTTGGGTGATACTACAAGCACTTTC
TTTAAGTACTCCTTTTCATCTAACCATGCAATAGCTGCAATAAAAGCTTTAGAAAGTCTT
TTCTCTTTGTCAAATTTCAATTCACGCTTTAAATCAATTATCTGGCGAATACCATTTTTT
GATCGTTTTACCACCTCAACTATTGTTGCTAAATGATCCCTAATATTAATATAGGGATTA
CTATCCACCCCGTCATGGCTGAATTTTTTTAGCTTCAATTGCTTCACGACGTGTCCCTTA
TAAATCAGTTGTGAACTTGTTAACAGGTGGTTTATTTTCTTGATACGTCCAGTCACACTT
CTAGGATCTTGCCCAGTTACCTGCGCCAAATCCATAGTATTGATCCCTTTTTCTCCTGAT
TTGGCAACTTCGAGAAGTAGTTCAAATGCAGAATTTCCAATAGTTGACTCCTTTTTTGTG
TATCCCGTTAATAATGTCCATAGGCTGTCCTCAGTAATCCCAACCGAGTATGAATGATTA
GCGTCGCCTATAATATCAGTCACATTTTTAGTTGTTATAGCACCATCACAATACACCTCA
ATGTCCTTTTTCAATATCACGCATGAAAGCACGAACTGTTTAACTTTTTTATCAGACAAA
TCAAAATATTTACCAGATATATCCCACAGCTGATTCAAAGTGATTTCTTCAATGTGTCGT
TAGTAAATAATCTTTCACAATATAGTACGTTTATCACCTAAACGGAGCCGAAAAGGAGAA
TGAGACATGAACATACTTCCCTTATTTGAAGCAATTTTATCAGACACTATTTGTACGAGT
TCGTCAGGATAAATCGTCAGTACCATTTTTCTTGTGGCTAGTTGGCTTCAACCAAACGTC
CTCTTCTCTCTTATGGCAAGAAGAAAGTTATATGTGTGACTGGTTGTTTATTTCACTTTC
GCGACTGAAAGCGCCGCCCTTTATGATGCAAAAAACCAAGCGGTATTTGAAAATGCAGAT
TTGCAGAAATAAAAGAAATAAAAATAAAAATCTTATAATTTTACCAGCTTCAATAACTCG
ATTTGCATAAGTGTGCCTTAGTATGCTTATTATATTGACTTTGACATTGAACTTCAAAAC
CTTTTATGTAATGATTTAAGTCTTGTCACATGACATAATAATAAATAATTTTAAAAATAT
AAAATATTTTTAATAGTTTTTAAATATTTTACAGTTTATTTTTTAAATTTATTTATATGT
TTTTGTTTTCCGAAGCAGTCAAAGTATTTTAATTTTCGGAGCTTTCATTTCAAGCGCCTT
TTTTTTACACATAATACGATCAAGATAAATTATTATAGTGGTACAGAACTCTTAAGCACT
AGGCGGTGGACCTTATTAGCTCAATCTTGAGTCAGTCCATGTATCGTTTTATAATACTTT
TTTAAGCACTTTCTTTAATAAATATTCCATTGAAGTACTGTTACTGAAATGAGATGAACT
GTTCAGAATGTAGAAATGGCGCCAGAAATCAATCATTGTTTAGCAAAAACACCTTTCGTC
TGCTGCCTCGGGTGTTTTTTCAAATTATTTCAGCAGGTAAATTAAGATAGTTATTCGAGT
GATTGCCAAATATCATGTTCTACTTCGAAGACTTATAGCTAATTAATTTTTTCATAATGA
AGGTGTCGTTAATTGTTCTGATTAGTAACATGAAACTCAAAAATCATCAAAAAAAGAAAA
GCTAAATGTATACTTTTTTGTCTACATTAGTTACCTTTTATTACATGAGAAAGTTATTTT
TCTTCTTTTTTTTTTTTTTTTTTTGAAACTTTTTCCTCTCGGAAAATAAAAGATATATTT
ACAAGTGAAAGCTTATTGTAATGTGTACTTTTAAACATCAAATAACAGACCTTTACATCA
AATAAGCACCGCAAGATATCCTAAAATCGACATCCAATGCATCGTAAATCATTGAGGAGG
GCTAGCGCTACTGTGCCTTCCGCTCCCTATCGAAAGCAGATTATTAGCAATGCACACAAT
AAACCAAGCCTTTTCTCTAAAATTAAAACTTTCTTTACCCAAAAAGATTCAGCCAGAGTG
AGTCCAAGGAATAATGTTGCTAATAAACAACCACGCAATGAGTCTTTTAACAGAAGAATC
TCAAGTATGCCTGGAGGTTATTTCCATTCTGAGATATCCCCAGATTCTACTGTAAACCGT
TCCGTAGTTGTTTCTGCAGTGGGTGAAGCCAGAAACGACATTGAGAATAAAGAAGAGGAG
TATGATGAAACACATGAAACTAACATCTCCAATGCAAAGCTTGCAAACTTTTTTAGTAAA
AAAGGTAATGAGCCTTTATCAGAAATTGAAATAGAGGGTGTGATGTCATTGTTACAAAAA
TCAAGCAAATCCATGATAACTTCGGAAGGAGAACAAAAATCAGCCGAAGGTAATAATATC
GACCAGTCGCTTATCTTGAAGGAGTCAGGAAGTACACCAATCAGCATATCTAATGCGCCG
ACCTTCAACCCAAAATATGATACTTCAAATGCGTCAATGAATACGACTTTGGGAAGCATT
GGTTCAAGAAAATACAGTTTCAATTATTCTAGCCTGCCCTCACCATACAAAACAACCGTT
TATAGATATAGTGCAGCGAAAAAGATCCCCGATACATACACAGCCAACACATCTGCTCAA
AGTATAGCATCTGCTAAATCGGTAAGAAGTGGTGTTTCAAAGTCAGCTCCTAGTAAGAAA
ATAAGTAATACAGCTGCGGCATTGGTCTCACTATTAGATGAAAATGACAGTAAGAAGAAT
AATGCAGCTTCAGAACTTGCTAATCCATACTCCTCATATGTAAGCCAAATACGCAAACAT
AAGAGAGTTTCTCCAAATGCTGCACCAAGGCAAGAGATCAGTGAAGAAGAAACTACTGTT
AAGCCATTATTTCAAAACGTTCCTGAACAAGGCGAAGAACCAATGAAACAACTGAACGCC
ACCAAAATTTCACCATCTGCGCCAAGCAAAGATTCTTTTACTAAATACAAACCTGCAAGG
TCCTCATCCTTACGCTCAAATGTCGTCGTAGCTGAAACCTCACCTGAAAAGAAGGATGGT
GGAGATAAACCTCCATCCTCTGCTTTTAACTTCTCGTTTAATACTTCAAGAAACGTTGAA
CCTACTGAGAATGCTTATAAGAGCGAGAACGCACCATCTGCATCATCAAAGGAATTCAAT
TTTACCAACCTACAGGCGAAGCCGTTAGTTGGAAAGCCAAAAACCGAACTTACAAAGGGC
GATTCTACTCCCGTCCAACCAGATCTTTCGGTTACTCCTCAAAAAAGTTCATCGAAAGGC
TTTGTTTTTAATAGTGTTCAAAAGAAATCACGGTCCAATCTTTCACAAGAAAACGATAAT
GAAGGTAAACATATCAGCGCCTCAATTGATAACGACTTTTCAGAGGAAAAGGCGGAAGAG
TTTGATTTCAATGTTCCCGTGGTGTCTAAGCAGCTAGGAAATGGCTTGGTTGATGAAAAT
AAAGTTGAGGCTTTCAAGTCCCTATATACCTTTTGATAATGAAAATTTTAGCCGTGACAT
AATTACCGTATAGCCCAACTCAATACGTAAGTTTGTGTAAAATACCATTCCAAGATGATA
TTATTTAGTCATTTTTTTTCCACTTTCTCAAAAAGAAGGAATACCTTTAGCGGCTCTTAT
AAACTATAAATTTCTAGAAGATACATAAAAGGTTTTTAGTCTGATCATAAAATTTTTTGC
TTAACAAAAAATTTGCCCAGGTGTTTCATTTGCCAGCCACAAGTAACAGCGAGAACAATT
AATTGAATGACAATCCACCACATAGCACGAGAATTAACAGCTTCAGAGGCGTCTCTAAAG
GTAGCTTCACGATCTCTCATCAATTTTTGCTCTCTTCTAATTTCGCCGATCTTGGAGTTT
AGGACGTTAACCTTGGCATGTAGAATGTCAATAGTGGCTTTACCCTTAGAATCTAACTTT
TCATCAGAGCCCACTTGGAATTCAACGTCAATCTTCGTTTTAGCCTTAATCAACCAGCCA
CCAGCTTCGGGCTGAATACAGATTTTATGTTCACCCGAATCAGACGCAAGGAAAGTTAAA
TCACCACTTGCTGAACCTTTCTGATGAACAACCAGGTGGTTATCATCAAAAGTTTCCTCA
ATATCAATCAAGACACCAAAATCTTGCGCACCAGCGTCTCTGTAATTTTGTAATTGGTCA
TCGTAAATTTGTGCCTTGTAAGTTGCTTGGAACAAAGTACCTTTAGACAATTCCTTGTGG
AAGCACTTACGTTCAGCACCAGAAGTATAATAATAGAACGCAGTAACTTGAGCTGGTAAA
ACTAGACAGCAGGCAAAAACCTGTAAAAGAGAGGTTAAAAGCATGATTAGTAGAGAGATT
GGTTACCTTTAAATACTTTTCCAAACTACAGAGGGAAGATAGAGTAAGTTTTGTATGTAC
ACATTTCTGCTGATGTGTTTTTTTTTTTCAACTTATTACGCGATTCGTTTTTTTTTTACG
GTAACAGAATACAGAATAAATTCACGTACAAAAATAGAGAATATATAAAATAATAGGTTG
ACGATTATATTGGATCTTCCCCTGGGGTTCAAGAGTCGAGACCGAGTCCTTTTAGTTTGT
GTATATCAGCTGGTTCTTTTCGTTATGAACATCCTTTTACAGGATCCATTCGCTGTTCTT
AAGGAACATCCTGAGAAGCTCACACATACGATTGAGAACCCTTTACGCACTGAATGTCTC
CAGTTCAGTCCTTGCGGTGATTACCTGGCTCTTGGGTGTGCCAATGGAGCACTTGTTATT
TACGATATGGATACGTTCAGGCCTATTTGTGTCCCAGGAAATATGTTGGGAGCACATGTT
CGACCCATTACATCTATCGCATGGTCTCCAGATGGTAGATTGTTGCTTACAAGCTCTAGA
GACTGGTCAATAAAACTGTGGGATCTTTCAAAGCCAAGTAAGCCTTTGAAAGAAATACGA
TTCGATTCTCCAATTTGGGGTTGCCAATGGCTGGATGCTAAAAGGCGGCTTTGTGTAGCT
ACGATATTTGAGGAAAGTGACGCATATGTTATTGACTTCAGCAATGATCCGGTCGCAAGC
CTTCTCAGTAAATCAGACGAAAAACAATTGAGTTCGACACCTGATCATGGATATGTTCTT
GTTTGTACAGTACATACCAAACATCCAAATATTATTATTGTTGGAACTTCAAAAGGTTGG
CTAGACTTCTATAAATTCCATTCTCTATATCAAACAGAATGTATTCATTCCCTTAAAATC
ACGAGTTCTAATATCAAACATTTAATTGTCTCGCAAAATGGTGAAAGATTAGCTATTAAC
TGCTCCGATAGAACAATAAGACAATACGAAATAAGTATTGATGATGAAAACTCTGCGGTT
GAGTTGACCTTAGAGCATAAGTACCAGGATGTGATTAATAAATTACAGTGGAACTGTATC
CTCTTTAGTAATAATACTGCCGAATACTTAGTCGCTTCTACACATGGTTCTTCTGCACAT
GAACTATACATCTGGGAAACGACTAGTGGAACGTTGGTGAGAGTCCTGGAAGGGGCTGAA
GAGGAGTTGATAGATATAAATTGGGACTTCTATAGTATGAGTATAGTGAGTAATGGTTTT
GAATCTGGGAACGTGTATGTGTGGTCTGTTGTTATTCCGCCAAAGTGGAGTGCTTTGGCG
CCAGATTTTGAAGAAGTAGAAGAGAATGTCGACTATTTGGAGAAGGAAGATGAATTTGAT
GAGGTCGATGAGGCAGAACAGCAGCAAGGACTAGAACAAGAGGAAGAAATAGCTATCGAT
CTTCGGACGAGAGAGCAATATGATGTTAGAGGTAATAACTTGCTTGTAGAACGGTTCACA
ATCCCTACAGATTATACGAGGATAATTAAGATGCAGTCATCATAGGTTTCTCTTCAAAAG
GAGAAAGTTTAAATAGGCAACTGACACTGAAGAGGTATAGTCATGCCTACCGCGATTTCT
TTGACACAGAATTGAAAAATTTTGCATTTTTTGGTAATTTCCTAATAATACGAAGTGCAA
TAATCTCACTTTGATAGGAGCACGTCATGATGGTAATTTCATACTACTGAACGTAAATGT
TGAAGGTGAATTTGTAAAGCTTTGTTATTTGAAGCTGTACACCTAAAGGGCGGTAAATTG
TTGGGTGTTAGTACCATGCCATTAATTAGAATTTGTTAGCATTTTTATTCATTTGTGCAT
TATGGGTTCAAATTCATATGACTGAACGTGTAGTTTCATATCCAGTCATCAAGAGATGCT
GAACCGCCCTTCAAAAACTTGACGAAATAGAAGTTTTTTTTTTACATTTCTCATATGTTA
CATAGATTAAATAGTACTTGATTATTTGATACATTAAGCTAACAAAGCCTTGGATAACTC
ATCGGCAAGATAGTCGGCTTCAGCCCTGTAATTCAAGCTGTGTAGGTTAGCAACGGTATA
TCTAATTCTGCTTTGATCATTGTATGTATCCTCACGCGCTCTAATCCTAAAGTCATATTC
GTTCATTTGGATACTTTGAGTAATTTTTGTGAATTCGTTGGGGTCTTCTTCCTTCAAAGA
CATTAATGTATTAGCATCAACACCCAATAATTGTTTAGCTTGGTCGTCAAATAAAGTGAG
CCATAGTTGATTGGTTTCGTCAATAATTGATATTGTCAAGATGTATCTCCAATTTGGCCT
TGCATTATTGGTGTCGCACTTCTCACATCTCCAAGTACCATCAGGCTGTTCCAGAACTTT
CTTATTACAATTCTCATTAGAACAGGCAGGATATGCAAAATTATCAACTTTTAAGAAACT
TATAGCAGCTTTAACACTAAAAAAGTCACCTTTCTCGCTTCTTCCTAGATTTTCAGCTTG
AGCTCTAGCAATAGTAATACGCTGAGCAATGAATTTTGTTAAGCTAGCAGCCGATTGACC
ACCCATACCGGGTTCTTGCTTTAAAGTGATGAAGTTTGCGTTGCGGCCCTTGGAATCATA
CCAACCCTTTAAGGCATATGCCTCAGGAATTTCTGGATTCGGAATCAGGGTACTAGAAAA
TCCCATAGACAAAGATTTGCCACCAAAATCCGTCACACGAACACCTTTAATGGCAGCAAC
AGAACCTTCAGGAAGGTTGAAATCAAGGGCTTGCTGATTCCATAGGCCAACAGAGATAGA
AAACCCAGAGTCGTCAACAATTGTGATGTCACGACGATCGAATTTCTTCCCAGCCCTTGA
AGTTAGCTCAAAATGTGGGTTTATAGTTTGGATAATACCGAGGACGTCTACGTTGGAATT
TACTTCCTGGTTCTGAATAGCATCTAGTTTGATGAAATTGAAATGGGTTTTCGGAACATT
ACTTTCATCGAAACATTCTTCTATAACAGTGTCTCTATCCAAATTCAGTTCATAAGGGTG
TGTTAGATTAGTAAATTGGGGCTTAGCTGGTTGGAGTTTTGCCTTTGATACATAGTATAC
TTTGCCTTCTTGTAAAATTTCGTTAAATTTTGTAGCAAAATCATTAAACGCCGTGGCTCG
GATTTCTCCAGAGGTATCCAAGAAGTTGACATTGAATAGTTTACCATCACCTCTTTGATT
GTGCCACGTTTTAATTTCTCCCTTGTAGGAAACTCTTGCTTTGATAGTCCAAACGTTTTG
GTATGGAGACAGTTGTTCGATGGCAAAAATTGGTCTGGTTTTTTGCGAATTAGGGTTTTC
ATTGGCGAATTTTCTCTCATTTGCATTCAAGTTTGAGTTTGAATGCAGCATATCAGGGAC
ACCAGCATTGCTGGCGTTTGTTTGATTGGCAACATTACCACTGTCAGTTATATCTTCGTC
TTTTAAGGTTTCATTTGGATGCTCTGAGAAATAGTTATCCAAAAAAGTACTAGTTTGGTT
GACCATATCAGCACGCGACTGGACCAACTCAAAGTCATCTACTAAAAGAACGTATTTCTT
TCTTTCCCTGACAATAGCAGGTTCTGCAATTATCACGCGAATGATATCACCCCTTTGTAG
TTCCATTGACTGGAACTTGGATGCAGCTTGGTTTCTCAACAGAGCCTTCATATGGTAAAT
ACCATCGGAAATCATGATCAAATTCTTTCTGTTGCTGTTAGCCCCATCAGATTTCCTGGT
GTTATAAACTTGATAAACGCCACCGGTGGGATTATCGTACCTTTGCTTATTGGTGAAGAT
GCTATGAAAATCGCCCCTCGAAAGTTGAACACTGCTCATCTCTTGTAAGTATAATCTGGT
CTTCTTGCTGGTTTCGCCTTTACCGTAATAAGAAGAGTGAATAGTTTTTGTTTTACGTGT
AGAACTTAAAGTGATAACATTTGTTCAAGTAAACCTTTATGTTAGTTCACGCGTCTTTTG
TCGCCTCGTCTAATTTTTACGCGTGACATTTTTCCAAGCAGAGATATTTTATTGAGCAGC
GAAGAAGAGTTAGAGAATAAGAAAGTGATGCGATAAGAAATCCACCCAATTAGCATAGAT
CCTTTCGTATATGGCTGAAGAAGGTGGTACGCGCATAGCTATTAACATATATGCAAAAAG
AACGGCAAAAGGCGAGGAGGTTTTTATGCCACCGCTAGTATTTGACATAGATCACATCAA
ACTTCTAAGGAAATGGGGTATTTGTGGTGTGTTATCTGGAACTTTGCCTACTGCAGCACA
GCAAAATGTATTTTTGTCGGTACCTTTGAGGCTTATGTTAGAAGATGTGCTGTGGCTGCA
TTTGAACAATCTTGCCGATGTGAAATTAATAAGACAAGAGGGAGATGAGATTATGGAGGG
AATAACATTAGAGCGGGGCGCCAAACTATCTAAAATTGTCAACGATCGTTTGAACAAGTC
ATTTGAATATCAGAGAAAGTTCAAAAAGGATGAACACATTGCAAAATTAAAGAAAATCGG
TAGAATCAATGATAAAACCACAGCTGAAGAATTGCAACGGCTTGATAAATCTAGCAATAA
TGACCAGCTAATTGAATCTTCTTTGTTCATTGACATTGCTAATACCTCTATGATTTTAAG
AGACATACGGAGTGATTCAGACAGCTTATCCCGCGATGATATCAGTGATTTGTTATTTAA
GCAGTACAGACAGGCAGGAAAAATGCAGACCTATTTCTTATACAAGGCATTGAGAGATCA
AGGGTACGTTTTGTCCCCAGGTGGACGTTTTGGTGGGAAGTTTATAGCATACCCTGGTGA
TCCTCTTCGTTTCCATTCACATCTGACGATACAAGATGCGATTGATTATCATAATGAGCC
GATTGACCTAATATCCATGATAAGTGGTGCAAGACTAGGAACGACTGTGAAAAAACTTTG
GGTCATAGGCGGTGTTGCGGAAGAGACAAAGGAAACTCATTTCTTCTCAATAGAATGGGC
TGGATTTGGTTAAGCTGGGAATCAGTCATGTATAATTATTTTCTCAGAATTTATGTATTT
ATAAGGTTTTTCAGAAGCATACATATGTGTAATACAATTTTTAAATTTGCATTGATATTT
TGATGCATTCAGCGGGAAAGTAGTTGTTTATCACTAGACATATAATTATGTTTATTTATA
TTTAGTGGGAGCAAAACAGTTTATTGAATGTTTACCAGAACCGAAAAAAAAGCTCTTCTA
AACTGTTGACATCCAGTTCATTTACTTCCACGTGTAGATGTGAAGGAACAAATATTTTAG
CATCGTTCATACAAGTAATTATGCTATATTATCGATCCTCGGATTTCAGCTTCCGTTATA
TCGGATGATTGTTACTCGACCTTTATGTCGTCTTTTTACATCATATATGATAATATGCTA
GCAGTTTTAATACAAATTGATCGAAGATAGTTGGTTCTGAGAAATGGGTGAATGTTGAGA
TAATTGTTGGGATTCCATTGTTGATAAAGGCTATAATATTAGGTATACAGAATATACTAG
AAGTTCTCCTCGAGGATATAGGAATCCTCAAAATGGAATCTATATTTCTACATACTAATA
TTACGATTATTCCTCATTCCGTTTTATATGTTTATATTCATTGATCCTATTACATTATCA
ATCCTTGCGTTTCAGCTTCCACTAATTTAGATGACTATTTCTCATCATTTGCGTCATCTT
CTAACACCGTATATGATAATATACTAGTAATGTAAATACTAGTTAGTAGATGATAGTTGA
TTTCTATTCCAACATACCACCCATAATGTAATAGATCTAATGAATCCATTTGTTAGTTAA
TAGTTTAAATGTTTTTATCGGAAGAGGTTTTGTCATCACATCAGCAATGTTCTTCTTGGT
CTCGATGTAGTATACGTATAAATTATTACCTGATACTTCATCTCTAAGTCTCATTGCCTT
TGTGCCAAAAAATCTGTTTCTAAATTTCTCTTCATTTGTAGACTTAATTATACTGATCGT
TGATCTACTATCAGTAAGTAAGCCTTTAATAATTGGTTTCTTGTTAAGTTCTTGTATCAG
GTAACTTAGATTATTTAATAATGGGACAGATTCACTTATCGCGTGTATTTCTGCTTCCGT
AGTTGAAGTACATGTTAATGAAGCCTTGGTGGACTTTCCTCCAATTACCTTTCCATTAAG
TAAATATATGTTGCCAATTTGTGATTTATAATACGGTTGGTTGCCATACGAAGCATCACT
TATTGCGACTAGTTTATTATCTGGCTCGGTAGGTTTGTTTTTGTGCCATATCAGTTGTTT
ATCTCTAGTGTCCCACATGAATTGTATCAACTCATATGTCATGTCTAAAACTTGCCTAGA
GGGGAATAGTATATGTTGAGCAAGTGTGTTGATGTAGTATAGTAAGTCAAATCTAAATTT
ATATCCAACATATGAAGCTAGACCAATCAACTTTTGCATTTCATGTACCTTCTCTTTGTA
TTCATCTTCATCTATTTCTAGTTCATCCTGGTCTATATAAAGACCTGGTTGACCTGGAGC
TCTAAGTTTCTTTCCTTTTGGGTTCAAAGGTACGTTTAGTTTGGGTAATTTTTCTGTCAA
GGATTTTTCCATACCTAATTTCATGTATTTACCTCTTTGATATTTGATTTCTAAGCCAAG
TATGTCGTACTGAATTTCGTTATCACTTTCACCCAGATTTATTATCTTTGTATCGTATTG
TTTCTTGAGTGTTGTTATGATTTTCTTATTTGCATTTAAGTCTTTGCTGAACAATATCAT
ATCATCAACGAATAAGCAAATTGTTACTTGACTATTCTTAAATACGCATGACCATCCACG
AACTTCTTCCATACCACACTGTTTTATCAGGTATGATTTGATAGTTTCGTACCAGTTCGC
TCCACTTTGTTTCAATCCATAAAGTGATTTCTTCAAACGTATCAACTTATCATTCATTCC
TAAATGTGGTGGAGGTCTTATGTATAATTCTTCTTTGATGTCTGCATACAAATATGCCGA
AGATATGTCTAATTGTGTAATATAGTAGTTATTGTCTAATGCAAGTGACAGGGATGTCAT
CAACGCATAATGATGTACAGTGTTGGATTGCATACCTGTATCGTACGTATCAGGATGCTG
AATGTCACCTCTTGCAACAAATCTAGCTTTATGAGTTCCGTCACGTTTCTTGTTGAAGAT
AAACATTGAGTTTATTACTCTTTTAGGGTCTATTTCTTTTCTGTCATAATATTTGTCAGT
GTCCCAAGTATTCATTTTCAATAGTTGGTTGACTTCTTTGTGGTATGCCTCGATATATTT
TTCTTTTTCTTTAATATCTTTATTATAGGTGATTGCCTCATCGTATCGTAAGGTTGTCCG
TATTGGTTTGATTGATTTTACTGCTTTTACAGCTGCAATCAGGTGAATTCGTTTCTTCGA
TCTCGGAGGTTCTAAACTACGCATATTCTTAGTATTCCATGTGTCTCGTGATACCTTAAT
TTCAGTTTCATTATCTTCTAATGATCTTTTCTTACTGTTGATAGTAGTATAGGCATTAGA
GTCACCAATACCACCCAAACTGGAATTAGTTTGATGAGAATTTATCGGTGGGAGTTCTTT
AAATGGGTCAGGGAATTCGGTAGGAGATTCTGGAGGTAGATCAGGGAGTGGGAGATCAGC
GATGATAGATTCCTCGGTATTCTGTTCAGAAACAGTAGTTGGCGTTTTGATAGGAACAAT
ATTGTGCGATGAATTATTTTCCGGTGGAGAAGCATCGATTGAAGGTGAACGGTGTATAAT
CCTTTTCTCAGTCTCTTGGTCACTTATCTGCGGAACAGTTTTGTTGTTGGTACCACCCGT
ACTGGATATTGGTACGTTTGTATGATTAGTCTCATTTTCACTGTACGAGTCTGAGTGTCT
GAAATCTTTAGATTTACTGGCGTGCGACGACTCATGTGTGTTAGATTGGGACATGGGAGC
AAGTAAAGGAACATTTAATTTATGCATACCACCCGAACCGGTACTCTCGATATTGGAAAT
TTGGGGGGTGCTAGATCTCTTCTTTGATGGAAGAATATTAGATTCAGATATGTTGGGGTC
AACTTCTCTGGGTGCGCGAATATTGGTTTTAGAAACACGTTTCGAATCTTCAGTATGAGT
TGACGGAGGTGTGGAATCGGTTGGACTCACAGCTTTTGAAAGGACATTTCTCGGTTGCTC
AGGATGTAGTTCAATGTCGGATTGGAAGTCATGGTCAGATTCTATGTTAAGATCATTGGA
TTCTTGGATCTCATTTGACGCAATGAACGAATGATATGAAGCAGTTAAACGGTTTAAGTC
TTCATCGAAAGTGAGTGCGTCGTAATTGAATTGATCTAATCTGGATTCCTTGCCCTGAAG
AATAACATAGTTAGTTGTATCTACTGTCTTCTTTAAGGATGGAAGATAGATGATATATCC
ATAAGAGTTTCGAGACGGATGTAGAGCGTAGCCTGGGATGCCACGAGGATGTATTTTGGA
GTTAGGGTTGTGATCATTGACGATAACAGGTTGACCGAAAGGTAACAAAGTACTGATATC
AAGTCCTGCCAAGCCAGCATGTTGTCTTGCAGATTTTTTGCTTTTAGGTGAAGCTAGTGA
ATTTCTCACAATAGTAGAAAATTCGATTGCAGAGAACCATAAATGGTTCGGTAAACCACT
ACATTGCAGTTGAGTACGGCAGTCATCTAATAAGGTACGGTTTAGCCGTTCAGCGACTCC
ATGTGCTCGGGAATCCGCTGTGGTTGTATAGCATGGAGTTATACCATTTTTTTCAAGGAA
TTTATGGAGAGTTCTGTTAGTATACTCAGAACCACGGTCCATTTGTATAACCAAGACACT
GGCCTGAAACTGGTTTTTAATAAAAGCTAGTATCGTAGTAAAAACATCGAGGATAGAGTC
CTCGCGACGGTCGTGTAATGGATAAACCCAACGCAATTTTGTTGTCTCATCAGTAAATGA
GATGAAATAGGATGGTGCACTTTTTGGTAGGTTGTGAACTGGACCAAATATGTCAGTATG
TAGGTATTGAAAGGGTTCGTATGAATTTTGGTATTTTAGTCGTGAACCTTTGATATGTCT
GTGTTTGGTGCTTTTGCCGATTAAACAATCAGGACATTGATAGTCAATAGCACTAGACCA
GTCGACATCTGATTCGTTAAAATACGTGATGGTGTTATTTTTAAGTGAGTATCGAATTTG
TCTGTGCATTGGCATGCGCAAGCATTCGATGAATGAAAGGATAAGGATATTTGCGTGTAC
TTTCACTTGTATGGACATTATTGATGGTGGGTACGGAGATATTTGATGGAAGCAAGTACT
TTTTAGATACCCAGTAAAAGTCTCCATATTTTACGATAGGTGCAAGTACAGTGCCGTCAG
ACCGTTCTAAGACGTTTTTGGTAAAGCATGCTGTGATATCTACTGCAGCCAATTCATTCA
AACTGAGTAAGTCATAGGCTATGTTAGGAGTGTGCAATACCTTTATTGATGTTTTGGTGT
TGTCCTGGAAGTGAAATTGTAGGTCACCAATAGCGTTAATTGGTATATTTCTTTTTTGAG
CATCAACTACGTTTATGTCAGGATTAGATGATGCTGAGTGTATGTGATGAGCAGATCTTA
TAAGGGTTCGTGATGCTCCTGAATCGAGAAGGAGGTGTCCAGGGAGTTCATCATCAGAAT
GATTAGTATGATTTACTGTAGATTCAGTAAGTTTCTGGCCTAAGATGAAGGTCGTGCTTA
TTGTTCAATTGAATCGGTTCAGTAGTTGATTTACTGATGGAATCGTTGTCCGTGCTGGGA
GAGTTATTAGATGTGGATACATTGTGAGCCCTGGCTGTTTTCGATTTCGAATTATTTGTT
TTTTGAGGATTCCGAGCTATAACTTTGGGTTTGGTTGTATTCGTATAGCTGCGAGAATCA
TTCTTCTCATCACTCGGATTTCTCCTGTAATTAGGTTTACTGTTTCTCGATCCCTGTTGT
TCTTCATAAATAGCATGGATATCTAAGAACAGTTCAGCGACTGTCATATTTAGATGTCGA
TGACGTGTGTAGCGTAAAAATTTATATTCGCCAGATAGACCTCTCATAATTAATTGGCAT
GCGACCTTGTTATTGATATGAATGCCATTATTGTTCAGTCTGTCGATAATGTTTGTGACT
TTTGTTTCAAATGCATCTGCAGGTGTACTGCCATTATATTGCAAATTTGCCAGGGTCACA
ATGTCGTTTGCCTCTTGGGTATCAGATTGCATTTTTTCAATACTTTTGGAAAGAATTTTC
ATGATATCCGTATAATCAACGGATAGGATGTCTTTGACCCAGGTAGGTAGGAATTGAGAG
GGAGCAAATATTTGAAAAGTGTTATACAAGAAGGTGAGTTCATCATCAGTGATCTGACGT
ACGGGTTTTCCGTTTACTGTCGGAATAATACCACCGAGATTCGAGTTTTGTAAAAATTTG
ATGTATGTTTTAACCCAATTTGGAAAGTCATTAGGTGAGGTTAACATTGGTGGTGGTCTG
ACATATTTTTTAGTGGATGTCATATCAGAGTCCGCTGAGGATGAATCAGTAAATGTATTA
CCTGACTCAGGTGATGGAGTGCTCAGAGGCGTTCCAACTGATGATGGATACTGCGGAAAC
TGTGATTGTGGCCCAGGTGGAAAGTACATAGGCGACATTTGATAAGGTGTATACGGAATC
ATAGATGGGTGTCCGTAAAATGACCAACCAGATGGATTGGCTTGGTTTTGGGTCATCATG
CACTGCTGTGGGTACGGCCCATTCTGTGGTGAATGTGACTGAGCAGTTTGAGGAGAGGCA
TGATGGGGGTTCTCTGGAACAGCTGATGAAGCAGGTGTTGTTGTCTGTTGAGAGTTAGCC
TTAGTGGAAGCCTTCTCACATTCTTCTGTTTTGGAAGCTGAAACGTCTAACGGATCTTGA
TTTGTGTGGACTTCCTTAGAAGTAACCGAAGCACAGGCGCTACCATGAGAAATGGGTGAA
TGTTGAGATAATTGTTGGGATTCCATTGTTGATAAAGGCTATAATATTAGGTATACAGAA
TATACTAGAAGTTCTCCTCGAGGATATAGGAATCCTCAAAATGGAATCTATATTTCTACA
TACTAATATTACGATTATTCCTCATTCCGTTTTATATGTTTATATTCATTGATCCTATTA
CATTATCAATCCTTGCGTTTCAGCTTCCACTAATTTAGATGACTATTTCTCATCATTTGC
GTCATCTTCTAACACCGTATATGATAATATACTAGTAATGTAAATACTAGTTAGTAGATG
ATAGTTGATTTCTATTCCAACAGGTTCTTATTTTCAACAATGTAATTGATGGCCTTAAAT
CTCTACTACATCATAAAGCTTCTAAGCACTTACCATTCCTTCATAAGTCTAGTATTGTAA
TGAGTTGGGCACATGGCGCAGTTGGTAGCGCGCTTCCCTTGCAAGGAAGAGGTCATCGGT
TCGATTCCGGTTGCGTCCAAATTTTTTTGTTAATCCAACACAATTGAATTCGTGAATAGC
TGACTGTCATCAGTAATGTTCGTGGAAAGTACCTATCCATACTGTTGTATCACGACTAAG
TAGTTGTCGACTACTACCTCCTCAACCCCAGTTATATCCCTATGACACATTGGAGGATGC
TGAATAATGACAGAATTTTATTCCTCCTTTTCATTATCATAATCTGAAGCAAAGTTAAAA
AATAGAAGAAGTAAGATAAACTTTGTAGATACGATATATAGTTGTTTGTTTTAGCTATCA
TATATGCTGAACTGTTACTACCTTATTTTTTCCGAAATGTTTCTAAAACAAATAAATATT
CATGAATATGATGCAAGTTCGTTGGATGAGAAAAAGACCAGGCTTTATTGTAAGGACAAT
ATCATTTACGAATAATTTCATCCAATTGTTTCATCAACACATCCATTCTGTCAAAAACTG
GAGCATAGAGATGTTGAACCAAAGAATTGGGCTTCGAAGCCGGATCGGACATATTGGTAT
TAGACAATGCCCTTGATCCGGAAAGTGAACTATTTATGCTTGCTGATGATACCGCCCTTT
GTTCATCCATATAAAAATCTTCTTCAGATGATGAGTGTAACGATAAGGTTGATTGCTTTT
CTTCTTCGGGGGTACTGTGATGTTTTTCTAGCTCCTCTTTAGGTTGTTCTGCGTCAGTTT
GATTTGCCATTCCTCCACTAGACCCCAAGCTGGCTTGAATTTGCCCCTCTGTGTTTTCCA
CGTTTGTTGTCTCTTCAATTTTCGATTTTGCATGAATATATTGTGAAATGTCCTTTATTG
CTCTAGATGATGGAATACTGCTGCTTTCTTCAACTATTGGAGTGGATGGTGATTCGTTTG
TCCATTCTGACGACGACGGTGAAAACTCGCCAATTGTTGAAAGGGAATTTTGAGAGTCTG
ATTTTGCCATACCATTCGCAAATGGCATACGAGGCGCTTCAAATACTTTTTTCAGATCGG
TATCGTAATCACTGTCAACCGGTTCAGACTTTTCTTGCCCCACATACCGATTTGCATTAT
AATCATCTTCTCTGTCTTTACTCGATGATGTCTTAGGCTCACTTTCGTTTTTGTTGTCTT
GTCTCCGAACTTTTTTCACATTTAGTGGTGTATTCAAAGATGTACTAAAGGAGACGTCGC
TCACTACATCGCTCGTATCATCATCCTGGAATTTGCCAAAATTTAACTTCGCTTCAGTGT
ATTCGTCCCGGTGCGTTACTTTTGTTTCCTTGTCGTTATCAACATCATCGTCGTACGACT
GTCCATTGCCTTCACCGCCATCATCGTTACTATCTAACGAGGTATCTTCAATTGCATCAT
CTATAAACCTGTCTGCATAACCGACAACATCATTGAAACTAACAGATTTGTTCCCCTTAC
CATATCCATTCAGTGCAGGTGTCGGAATTATACTCTCTGCATCACTTTGATTCTTGTTAC
CAGAGCTGATGGAATCATCTTTCGAATCGGAGGAAGCAACCGATTGAGAAGACATGTTTT
CATTTTTCCAGCAATTCAATCGAGCTAGTCTTTCTGGAAAGGTTTCTAGAATTTCCGCTG
GCGCAAACCCGATTTTACCATCAGTGATCCTCTTAACCAGCCACCAATAGGCATCCTGGT
CATTCAAAAGTATACAAGGTTCGTCTTGCCCTAATTGACAATGTGAAGAATCATGGCCAT
TGAACGCATATAAAGCATATAGTTTATCAGGGTCCAGTTCTCTTGGCGGCGATAAGGGTT
GGTAATCGTCGTTTTCCTCCTCCAAATCGTCTTTCTCCCCTTGAAACCCTGAATCTTGAA
ATTTTCTGTCAAAGTCATCGTCATCAGAGTAGTTTTCCTCTTCATCCTCGTCCTCCGAGA
TGGCGTATTTCAAGCCATCACTAAAATCGTCAACGTCAGGGTTCATTGTATTATTCACTG
AAAAATGCACCTCATCCTTATCGGCGCTATCCACGGAATCAGTTTCGATCTCTTGTAGCC
TTCTTTCCAAATTGTCCTCAAATTCAGAATCCGAATAATCATATGAGTCGGGCAATTCCG
AAGAATTTTCTTTGTAATGTCGCTGATCCCTTTTACTGTTGCTATGCATATGTTTTTCCA
CGTTCTCCTCCTCTAACTCTTTGTCATCATCTCTATTTCGCAGAACATCATGGCCCTTTT
CTGCCGCATTACTCAGTATATTAAGTTTCGAATTGAAGGGCGAACTCTTATTCGAAGTCG
GAGTCACCACAACACTTCCGCCCATACTCTCCGAATCCTCGTTTCCTAAAGTAAGTTTAC
TTCCACTTGTAGGCCTATTATTAATGATATCTGAATAATCCTCTATTAGGGTTGGATCAT
TCAGTAGCGCGTGCGATTGAAAGGAGTCCATGCCCGACGTCGACGTGATTAGCGAAGGCG
CGTAACCATTGTCATGTCTAGCAGCTATAGAACTAACCTCCTTGACACCACTTGCGGAAG
TCTCATCAACATGCTCTTCCTTATTACTCATTCTCTTACCAAGCAGAGAATGTTATCTAA
AAACTACGTGTATTTCACCTCTTTCTCGACTTGAACACGTCCAACTCCTTAAGTACTACC
ACAGCCAGGAAAGAATGGATCCAGTTCTACACGATAGCAAAGCAGAAAACACAACCAGCG
TACCCCTGTAGAAGCTTCTTTGTTTACAGCACTTGATCCATGTAGCCATACTCGAAATTT
CAACTCATCTGAAACTTTTCCTGAAGGTTGAAAAAGAATGCCATAAGGGTCACCCGAAGC
TTATTCACGAGTCAGTCTGACTCTTGCGAGAGATGAGGATGTAATAATACTAATCTCGAA
GATGCCATCTAATACATATAGACATACATATATATATATATACATTCTATATATTCTTAC
CCAGATTCTTTGAGGTAAGACGGTTGGGTTTTATCTTTTGCAGTTGGTACTATTAAGAAC
AATCGAATCATAAGCATTGCTTACAAAGAATACACATACGAAATATTAACGATAATGTCA
ATTACGAAGACTGAACTGGACGGTATATTGCCATTGGTGGCCAGAGGTAAAGTTAGAGAC
ATATATGAGGTAGACGCTGGTACGTTGCTGTTTGTTGCTACGGATCGTATCTCTGCATAT
GACGTTATTATGGAAAACAGCATTCCTGAAAAGGGGATCCTATTGACCAAACTGTCAGAG
TTCTGGTTCAAGTTCCTGTCCAACGATGTTCGTAATCATTTGGTCGACATCGCCCCAGGT
AAGACTATTTTCGATTATCTACCTGCAAAATTGAGCGAACCAAAGTACAAAACGCAACTA
GAAGACCGCTCTCTATTGGTTCACAAACATAAACTAATTCCATTGGAAGTAATTGTCAGA
GGCTACATCACCGGATCTGCTTGGAAAGAGTACGTAAAAACAGGTACTGTGCATGGTTTG
AAACAACCTCAAGGACTTAAAGAATCTCAAGAGTTCCCAGAACCAATCTTCACCCCATCG
ACCAAGGCTGAACAAGGTGAACATGACGAAAACATCTCTCCTGCCCAGGCCGCTGAGCTG
GTGGGTGAAGATTTGTCACGTAGAGTGGCAGAACTGGCTGTAAAACTGTACTCCAAGTGC
AAAGATTATGCTAAGGAGAAGGGCATCATCATCGCAGACACTAAATTCGAATTCGGTATT
GACGAAAAGACCAATGAAATTATTCTAGTGGACGAGGTGCTAACGCCAGACTCCTCTAGA
TTCTGGAACGGTGCCTCTTATAAGGTAGGAGAATCCCAAGATTCTTACGATAAGCAATTT
TTAAGAGACTGGCTTACTGCTAATAAGTTGAACGGTGTTAACGGCGTCAAAATGCCCCAA
GACATTGTCGACAGGACAAGGGCCAAATATATAGAGGCTTATGAAACATTGACAGGGTCT
AAATGGTCTCACTAACGTGATTTACATATACTACAAGTCGCCAGTGTAACTCCTCACTGA
ATATGATTCATACATACCCGTATGTATTAATGTATAAATGTTCTCAGAGCAAATTTTATC
GATATCTTGTTTGCCAGTGGTATGCAGGTTTGGCAAATTTTTTACCATAATATCCGTTTA
TAGATTCTGGAACCTTACCAACTTTCTTACCGCTAATTACTTCCCTGGCTCGCTCCTCCA
CTGCCTGGGTAAATTGTTCCTTCAACTGACTCAGTTCTCTTTCGTATTCAATAGCTTGCT
TCTCGAGGATTTTTTCAATGTTTGTCAGCTCATTTTCATAGTCCAGTAACTTCCTTTCAA
ATCTCTCTAATTGCAACGACTTTCTTGCAGTTCGTATCTGAATATCTTGCAGTAATTCAA
AAGTGGAAGGCCTGGTTCTTAAGTTCACATCTATCATTGAATGTATTATGGCATTAAGCC
CTCTAGAGTAATACTCAGGGACGGTGTCACATTTCCCGTTTTTAATCTTAGTTTGTAGCT
CGAGATAATTTTTTGCCTGAAATGGGGGGTGCAACGAACACATCTCAAAAATAACACAAC
CTAGTGACCAGATGTCGGATAGTGGGGAGTATGGTTGGTCCATCAACACTTCAGGCGACA
TGTAATATGGTGTACCGACGTATGTTGTGGCAAATTGAATACTAGTTTCCAGAGATTTGG
CTAACCCAAAATCACCTAACTTTACCACAACTTGACTATAGTCCATAGGGCTCCCCCTTT
TCCCTGAATTCACTCTATGGTCTCTGTAATAATTACTATTCACTTCCTCGTGACCGTCTA
CTTGTTCATTAATATTGTAATCGCTATCATCATAGCTTAAGAATATATTTCCTGGTTTCA
GATCACGATGGATAACGATGTTTTTGCCTTTTACCGGTGGTTTCATCCGGTCATATATTG
TGGTCAAAGTTGGCAATTCAACACCATAATGACATTTATAGAGCGCAGTCAATAATTGGG
CCAGGATACCCCACACAATTTTTTCTGGTATATATTTATGCTCCTGTTTGTAGTGCTTAA
TCATCTGGGATAAATCACCCCTGGAACAATATTCCATATAAAGGTATAACACTTCTTTTT
GTTCATCGAAGTCCCAGTTATAAAATTCTACAATATTTTCATGCTTCAACTGCGATAGAA
TGCTACATTCAGCGATCAGCTGTTGTCTCTCTTTGCTATTCATATGGCCATATTTGATAT
CCTTTCTAACCAAAAGTTTCTTGGTAGGTATATGGATGACTTTTCGTACAGACCCAAATG
AACCTCTCCCAATTTCTTCGAGAACTTGGTATTCTGACCTTGGTGGGTGTCCCTGCTGCT
GCTGAGGACTACGGTATTCTTGGAAAAACTGTCGTCTATGCATACTCACACAGAGAATTG
ATTCAATTATCAAATAGCACTCTCATTGAAATTAGTATTGTGAATCTTGCTCTTTTCATG
TTATATGATTTGATATTCTTTTGAAAAGTCGCTTTTATTTACGTTTAACCTAATTAGGAA
ACGTAATGAAAAAATTCAGAAACCTTAAAAAAAAAACTTGGCTGTAACCTATCGGAAGAC
TGTGCCACTGCAATCATGTCAGATATCGTATTTCAGATTTATTGATCTATAGCTAGAAAC
ATTTAACAAAATGCACTTTGAGTCGTTCATACATTTAATCCCCAATTGAAAAAAAAAAGA
AAAGAAAAAAAGCATATATATGTATATGCTTTTTTATCATTACTGGCCTCTTTAAATTCA
AAAACTTTTCTGATCTCTTTTCCAAACAGATGCGTTTTCAGTATTGGAAGGTTCACAATT
CTATATATAGTGTTAATGTAATGCTGTATTATTTCTCTATATATGTATGTATGCACATGC
AATTCCTACATTATGTTTGAAATGTTGTAATGGGGACGGAAAAGCCGTCACTTTTATCTT
TGGAGGATCGCAAATTACTACGCTCATCTTTTGTTGGAGAACTACCAATTGCTGCAGTGA
CGCTTGAAACTTTTTGCAGGCTTCCTTTTTTTGATAATGAACGGATATCCTCACATAGCT
GACAGATCAAAACTGAGTCCCCCCCAACTTGATTTGAATTCCTTTTTGGGACATCCTTGT
TCCAGTTGTTGTTTAAAAACTCCGTTATTTGTACTAAAATGGCACGAAGTTTGAAAACAG
TGGCCTTATTACGACGATTTGGTTCGGTTTGCTTTATAGGATCCGGCTGTCCTGTGTAGT
CATATAGCTTCAATAACGATTTTGAGAATATTAGCTTTATGAATTTCAATAGATCGATTT
GAATAAGTAAACTGTTGAAATAGGTATCAAAGAAAGAAACAATCTTTTCATAAAAGTTCG
GGTGAAATATGATATTAATTGTAAGGTTTTCAAAACCGGGCAATGAGCATATCTTCGTGA
AAATGCTAATTAGTTTACTGAGGTTAACGTCATCGTCATTCAATGCATAAAACAGGTCAA
CTAATTGATCAATCGGTAATTCAATAGCAGCGTCATTGTTGACCTTTATGAGGAAAACAC
TATGAGACTCTGATGAGCCCACTGTAGGAGCCACATCATCATTTACATTGCGTAACGTAA
AATGCAAGCAGTTCAGTATGATCTCCAGTCCACTTATGGAGGTGTTATTCTTTTTTCTGA
TGAAATTCATAGCTGTAGAAAATAAAGAAGCACTCATTTGGTCCATATCCAAACTCATTT
CAACGCATATAGCAGTGATTTGTTTCCAAATGAAAGCTGCTGTCTTTGCGTCGTCGATAA
AGGGAATGATGGTATCAATATTCCGGATAAAAGCAAAAAAAGCATCGTTGTCAAGCAGAT
CATTTAAAAAAGTGCTGTTTATATGTACTGTAAGGTAACAAAGCTTGGTGAAGTACTTTA
AAACAGATAAATCTTTGATTTGGGCCATGTCAACAAAAAAAGATGTTAGCCAGGTAAAGA
AACCCTCCGGTAATTCAATTAGTAGTCTTGATTTTGAAGATATGGTCAGATGGGGAAAGT
TTGAAATGCTCTTGTGTCGCATTGGAGAAGAGGGACGCGTTGCCATCAAAGAATGAACAG
GGGACCTTGATGGAGACTGTACCGAATTCACTGGTGAGTTCCTCGTGGGTGAGGAGGATA
ACGGTAGAGAGGAAGAAGAAGGAATAGCGGACTTGTGTATTTTATCGTCATTCGTGGTTA
TCATATAGTTTATTGATTTGAAGACTACGTAAGTAATTTGAGGACTGATTAAAATTTTCT
TTTTTAGCTTAGAGTCAATTAAAGAGGGCAAAATTTTCTCAAAAGACCATGGTGCATATG
ACGATAGCTTTAGTAGTATGGATTGGGCTCTTCTTTCATGGATGTTATTCAGAAGGAGTG
ATATATCGAGGTGTTTGAAACACCAGCGACACCAGAAGGCTGTGGATGTTAAATCGTAGA
ACCTATAGACGAGTTCTAAAATATACTTTGGGGTTTTCAGCGATGCAAAATTCGGAGGAT
ACATTATTCCACATTCAATTAAAGTCTGAGGGTAGTCGATGACGAACTCTTTGGCTAAAT
GTTCGAATTTAATGATCAGTGGAATTCCTCCCATAGCGATGAATTTCAGTCGCAACCTAG
AGTGGTTATGCTGGGTATCGTAAACAAAAATGGAGCCAAATGCAGTTATTAATCGTTTAT
CAACAGTTGTGCGCGACAGACACTCGATAATTGTATCAGCGATGTTCTCGAGGGAGCAAA
CACTGAAAAGCACATGCAAGTCCGTCAAAGGCTTAGATGAACTCTTCAATTGGCTCAGCA
ATTGACTTTCAGTGGGGGGCATTAAATCTAGTTCTTGATTGTTTTCTGCCCAGGCAGCGG
GAGCCGCTGCAAGACTGAATTTAGAGGGTGATATATTTAGTTTCTCTTCTTGAAAATCGG
CATCCCAATGATAATCAGCGTCGGTAAAGTCCTCCTTGAACTTGTTGAGCTTGTCGACCT
TCACATTTTCGGTAGAGTTGATCCACACATGCTTGAGTAACTGGTCGGCTGTCGGCCTCT
TGTACATGTTTTTCACAAAGCATTTAGATAAGAAATCCTTTAGTGGCTCAGAGAAAGAGC
TAGGTGGGTAGTAGGTATCATTTTCAACAGCGTAGTAGATATTGGCGTCTGTCAAATTGT
GGTAGGGTGGATTCTTTGTGAGCATTTCAACTACAGTGGCACCTAGAGACCAAATGTCGC
TGAGCGTAGAAGCTCCCCTGTTGCCCAGGATCTCTGGAGCCATCCAATTGAGTGTGCCCG
CTAGCGTTAAGGCGCTGGAGTTCACAATAGTGGAAACGCCAAAATCAGCAAGTTTGACAG
TGTTATCAGCACTCAGCAGGATGTTAGCCGCCTTGATGTCCCTGTGGATGACTCCTTCAC
CGTGTAAATATTTCAGCCCCAATAGTGTCTGTGTCACATAGGTTTTCGATTCATTTTCAC
TTAATCCGGTAGAGCTCCTTGAAATGAGCCTCCTCAAAGAACCATTAGCGCAGTATTCGA
GGAGGATATACAATTCATAGCTTTTTCGTATGAAGCCGTGGTATTTAACAATATTGTTAT
GGTTTAAATTTTTTAACAAGCTAATTTCTGCCATAATGTCATTAAGTTCCTCATCATTTT
CGTACACGACCTCCTTTATTGCCACGACTTGGTCAGTATGTTTATTAATGGCTTTGTAAA
CTACCCCGTAAGAACCCCTCCCAATGACCTGCTTCAAGTGGTATTGCACGGATTTCTCAG
ATGCCCTCTGGATGGGAGTCAAGTTGACTCTATCGGTATCGGCCATACTGTTCATGGTAT
AGTCTTACCAGGAAAATGGGTAGTGCTTATGTGTGTTTTGTCCTTCCTCGAGCCTCCAAG
TAGAAGATATACCTTTTGTGAGGCAGATCTCCCGTATACAAAAATAACAGCAAGAAAAGC
GGAAAGACCATCGCAAGGTGGAAAGGATTATAATGGCACAGCAAAGTCCGCACAGAGCAC
TACAGTATAGCATAGAGTGCTAATGAGTTGATAGGCCCAATTTTGATTATGCCTCTTTTC
CATACACGACGCCAGAGGACATTATTACATTACAGTAGTTCGCCGCTAGATGACAAACGA
CATCCTTACCGATATGAGATGTGCAAAGCTACATAATGGCAACAAGCGTTATGAACAGCC
TTGTCTTTACGACCACAGAAAAGCCGTATTAGAGCTCTTCAGCTGCAAAATTTTCTTCTA
ATATGATGCAAAGCCATCAAAAATCATGCATAGTTATGAAATACCTGATGAAACGCTTCG
AGTTCGTGCTCAAGAAATTACTGAAAGGTTACCGAGAAGAAAAATATCTATGAGACACGA
TAAGGCCCCTTCTGAATCCATTGTCCTGGGCTTGTTCATTCTATTTACCACTTAAAATTG
ATCCTTTCAAAGGAATTTTTTTCTATTTCCAATAGTATATTTGTACAAAAACTACAAAAA
TGGATAAAAAATAACAGTAATTTGTGACTACTGTAAATATCACTGATTTGGATTTTGTAA
TGAGTACTGCTCATGCCCATGCCGATGCAAGTGGATCATAAATTTTACTAAACGATATTC
GATAATGCGCCAAGCCTTTATAAGGAACTCAAAATAACCCATATGGACAGTTTCAGAAGG
CCAAATAACGATCAAGGACATTCACTCATGTTTTTCAAAGGCGAAGAGTGTAAAATTTTC
TTCTATATAGTTCGAATATTTTATCTTATAAATTTCAGTCGTCATTTTCCACATTCGAAC
TCAAATAATGATAAAGAACGCTGCAGTAATGGCTTAAAAAAACATACTTTATAACCCATT
ATCTCTTACGTGTAATTTAAAATTGTTTATAGTACTATTTGGTTATGCTTGTATGCCTCT
ATTATTTACTTGATCTTTTTATGTTTTCTTATGATTGAATTATTTATATTCTAAATTCCT
CACGAATTTATACTGAAGATTTCCTTCCAGGCGAGAATAATAAACACATATTTATGATGA
TAACAAGACGAACGTGTATTAAGCTCCCAGTACGAGGGAAGCAGTAAAAATTATCCCAAG
ATCCATTTAAAATGGATAACTCCACGAGCTACAACAAAATACTAAGGGAATAGGCCGTTA
TTTCCGTAAAGGATGGTTTAATAATAAGAAATTTATAATATTAATAATACATATATACAA
AAATTTATATTTATATACATGCGCCTAACTATTCATACTATTAATTTCATATTATTAAGC
TTTTTTTTTTTCATTTATCATTTTTTTTCGTAACCTCTCATACCTGTACAGGTTTCATTC
GTAAAGCAGGGACTCTAGTTTGCGATAGTGTAGATACCGTCTACGGATAGAGCACTAGAG
ATAGCTGGCTTTAATCTGCTGGAGTACCATGGAACACCAGTGATAACTCTGGTAACTTGG
TCGGCGGGAATACCAGTCAACATGGTGGTGAAATCACCGTAGTTGAAAACAGCTTCTGCA
ATTTCAACTGGATAAGTTTCAGTTGGGTGAGCAGCTTAGAAAGAGTAGTATTCAGCCAAA
TGAGCTCTGATATCGGAAACATAAACACCTAATTCAACCAAATTAACTCTTTCGTCAGAT
TGAGATAATGTAGTGGTTGCTGCGGCGGAGGCACCAGCAGCAATGGCGGCGACACCGGCA
GCGATTGAAGTTAATTTGACCATTGTATTTGTTGTTTTTTGGGTTATTGCTTAGTGATGA
TATAGGCTTAACTGGAAGGAAAAGAACAGAGAAATGTCTCAAACAAAGCTGATCAAGCCG
CTGTATTTATATGAAACTTTGAACAACTACATCTGCACACATGGGCTCTTACTGGTCGCC
CATCTCACACTCATGCCTTCCACATTCCACTTAGCGACTAAGTCATTATTACTATGGGGA
CGGGTTGTTCTTGAACGATGCTATACTTCGTATAGGAAGCCGTTTTTTTATGCCCCATCC
TTTCATATGTTCCATAGCACAAGAATGTTCTCTACAGGAAAAGTGCCTATAGGGCTGCAG
CTGCAGTTTTGGCCAAGAAATAGAACCAAAGCCAAATTTATTTTGGGCCCTCGTTCAAGG
GCCATCTCACCCTTGGCACTAAACGGTTAGTAGGAGGGAAATCGGACTTTTCCCAAATTA
GAAACAATGAAAAATTAAGTGTGAGCTCTTAGAGTCGCATCTGCAGGAATATGCACACAA
AAAGGGGAGCTGTACGTAAATAATCAGACCACACAAACTATTGCCAACCATTTGATACTC
ACGCTAGATATGATGGGGGTTCTTGTTTGGACAACACAAGTCTCAGAGCCAGCGTAGATA
TGCTTGTACATAAATGACGACTGGGGCATCAATTGAATCGGGTTACATTGTGCGAGCTAT
TACATGAAGAGAATATGCCTTTAGGGTAATTTCCAAATGTAGGAAGTCTCGCTAAGTAGG
GCGCCCAAATCTGTATAGCGATGTTGTTGAGGCCATATAGTAAAATGACGTGCCAATTAC
CGAGCTTTTGATGGAGGTAAAATCTAAGATTAATCTTGCGCCTTGAAACCACTAGAAATG
AAAGGAATTGGTGAAAAAATAATCGCGCAATAGATGACATGGAACGACAGAAGTCTTGTA
TTGTGCACGAATCCGCAATATTCAAAGCCGAAGTTCATATACGAATGCGAACTATTTCTT
AGGGTAGCTCTCTGTATGGGCCGCCATAAATTAGTACCAAAAGATAGGTTTTTGAAAAGG
CTACAATGTGCTTTTTTCCTTCTTGCTTTCGAGTCCGGTGAACAGAATATTACGACGTCC
TTGTATTAAGAGCCAGACCTCCTGTTAGCGTCACTATAAGAGTAAGTCTGAAATACGCAA
CAACTACAGTGCAATGAAAAAGTGCTCAACTCAATGACAATAAACAATTTAACCATGGCA
GGTTAAAATATTACTGCGATCAGTAAAAATGGGGATATCACCTTTTGACACATAACATAG
CAATAAAGTAACAGATCATTAGTGATCGGACAACCTGAACCAACGATATAATGTCGAAGC
CACCACTACCTTTAAGATTAGTAGCGCTGCAGGGGGAGACAATGAGAGAAATTTCCCGCC
ACATGAACTGAGTCAGGAGTTTTTTTTTTCTTGCTGGAGAATCATTTAATTTCATGGTTA
AACTCCTCTATAAGCATCCCATTCTCCCATGCCTGAAAACACTTTTGTCCATTCGATCCT
CATGCAGCCCTCGTTAATATGCTAAAATGGCTCATTAAATTGTAGATTGTATCGTTCGAG
AAACGTCAGGCATGATAGATGTTGCAATCACAGGACATTGATTATTTAATCCTGCTCTCA
ACATGTTCAATAAGTTGAAGAGTTGCTGATCTCCCCGTATATCTTATGAACCAAAGCATG
GTGGGTGAATGTTATGGTTATCCTTGTTGAAAAATGATTGATAGACTGGATTGAGCGGAA
AAACATGGGTCAATATGCTGATCTTGACATTTTTCAAAATCCACGGGGGATCAAATCAAC
TTCTTATAGCGTATGACCTCTTTTACATTGTTTAATGATGTTAAGATTGCGATATTATAG
TCAGTTAAGTTACTCAAACGCACAGATTTAATAGAAAACTGCGTCTTCGTTGCCTAGTCG
ATCATAATAAATTCGCAGATTATTTCGAATTTGATCTCCTTCGAAATCAAGTTTATTCTC
TTCACAACAAAAAATGCTTTTAACTTGAACAAAACTCGTAAACTATTTCCCCACTGTTGC
TTCGGGACGACCCAGTTATTCAATATCTTGCAATGCTAATTTTTTTTGGGAGAGCAGTTG
CAAATATTGCAAACACATCTAAAGCGTACCCACAATTTATGACTTCCTGGAGCCCAGAAC
AGCCCAAAAAAAAAAAGATGCGTTCTTTTTATACCAATATATTAGATACGTAAACTCTAC
TCATATTGCAGGTATGCCCACATCTGGATATTGACTTTGCCAATATTCCCGCACAGCATG
GGCTTGAATTTCGGCTGCTTTAAAGAGGCACCACTTTACGGTTGGTTCAACATCAGAATT
TTGAGTTGCAGCCTGATTTTCTGGAACACTGATGAACGGCTGTGTATTCGCTGTATCCCA
CTGTACATCAGGATATTTTCCCTTTATGAGATCCTTGAAAAATTCATAGCACTGGTGTTC
ACAAAAAAAGTGGTATGGTGTTTTCCATAAGCCAGCCTTGAACAAATATTGATTCATGTT
ATACGTTATGGTTTTCCATTCTTTCCCAGCTATCGATGGTCTATGAGTTATTACCTCTAG
TAGAAGTTTTGTACGGAATGTTTCATTACTTATTGGTCTACTGAATGACCATATCTGAAG
GACTACCATAGAGCCACCTAAACATATCCGGATCACCATGGCAGGGGAGAGAACACCAGA
AAACCAAATGTTTGTTAAAGTCGCCAAAATCGTCAAGACAAAAAGGAGGAAATTGATCAT
TATATACTTGGCGCGTACAATTTCGTAAAGCAAATAACTCTGGTATGATGCAAACTCATC
CTCTGGAAGGACGATATCAGCTGAGATTAAAGGACTTTCAGGGTTGTCAGGAGATCCTTC
CCTCAATGGGATTGCTTTAGGATCGTCCGTGACATGAGTGTTTTTTTTAAATAAGATTGC
ATGTTTAACAAACGATTTAACTTGCTTTTGCTTACAAGTCAAGTAAACCTTATCCTGATA
GCTTAGGAAAAATAGACTTGAATGTGTCGAACATTTCAAACCTCAATTGGTATTTTCCTT
TTTTTCAACTGTACGTACATAGCTTTTCGCTTTCTTTAGCGCCCCCAGATGAAAGTATAT
ATCGTAACAAGGATGGGAACATGAAAGGTACTGAAAAAACATCTGTATTTATTAAAAGTA
AATCAAAAGCAGACTGGGAAGTTCTGTCGTAGGGATTTTTTTTTTAATGTTATGTGTGTA
GGATTATTCTATTTCCTTGAATTTCTCGATCGAGATTTTTCGTACCTGTGTATTTTTGGA
TATAAGAGTGTTTCTGATCTATTGAGTGAGCAGGTCTCCAGCGGAATATAGAGTAGATTG
AATATGGAAGAGGACTACATTAAGGCTTATTGTTAGTTAGTTACTGTTAGGACGCTTCGG
CGAGCTGATGTCTGACTTCTCGTTGTATCAAAGAGCTCCCAATACGCCAGCGCATTTAAA
CTATGATCACGGAATGCTGGATTAGTAGTATAGCAAAAGTAACACTTGTCCACCGCAGAC
TCCATCACTTAGTCAACACCTTGGGTGTTTTACCGCTGATAATGGCCGTAAAATCGCCAG
ATATATATCATCATTGTTCTTCGCGAATAATACGTAACACAGTCTCTTTTCGAAATTTAG
ATGAGGACCATAGGCATGACTTATTTACTGAGATGTCCCTGCGTTAAAACTTTTACTGGC
CGATTGCTAACTTTATATTTGTTAATAAAACTATTCACGCCTGTGTCCTAATTGTTGGAT
AATACCTAAACAATAACGATGTTGTATAGCTAAGAGGACGACCAGACAAAAAGTTATAAA
CTTTACCCTCGTTGAAAATGGGGCAGCCACCTATGAATCACTTCCCATTACAATGCCGAA
TAGCAAAATATGTAGTAGAACACGTACACGCATGATAATTACTTCCATGCTGTACTTATT
TTTTGGGTGTCTCTTCAGAAAGAATGCTTTATATAACCATGTGTTTGAATTAGCGATCAG
CTAATAACAAGTCAGTGTCCAAATAGTTAAAACATTGTGACCCAAATATCACAAATAAGT
GGTTGTTTGGCCGAGCGGTCTAAGGCGCCTGATTCAAGAAATATCTTGACCGCAGTGAAC
TGTGGGAATACTCAGGTATCGTAAGATGCAAGAGTTCGAATCTCTTAGCAACCATTATTT
TTTCTTTTTCCTCCTATACTTCATAATCTACGTAGGAATGAAAGTACCAACATTATACCA
ATGAGGGTGTGTTTCGTGGATGCATATACTCTGAAGATAAAAACAAACTCAAGTCCGCTT
CCTACGGTTTGAGTATTTCTTACCACTACATAATAAAGAATATTACGTTAACTGTAAAAT
CAAGTAGACTTGGAAAATACAACGAGAACACTTTCCTGATTCTGCATCAGCGTTTTCTTA
TCACCAGCTGTACTTCTACATTAGCTAACTCTCCTTTCTATAAAGGGCGTCTTTCACTTC
ACTTGTGCCATGTTACAAAGCTCCAAACGCACTTCTAACTGAGTACAATGCACGATCCCA
CTGACAGACAAAACAGCTTCACAGAATTTGATCATGCCATCGTAAAAACCACGTAGTAAG
GAATAAAAAATCCCGAAGTCGATCATACTATGTAGAGATGTACATGAATAGTCTAGGAAT
CTGGTCTTCCAGCATGTTGCTTTGGTCTGCTTCAAGCGCTATGGAAGCGCTCGCCATGAG
ATATGCTGTTTCAAGGCAAAATAGCAAAGCTCTTTGTAAAGAAATACAATTCAGAGAAGA
AGCTACAGCATTTTGTTTCTGGATGATCCCTGCAGGTTCATACTACTAAGTAAATCTTGA
ACAGTTCAAATTTCAACAATTCAGAAACCGCTCTTTTTATATATACTCTACCAAACGAGA
TGAAACAGCATTTTTTTACTCTTATAAGGTACCAATATTTTGACGTATGCTTTCTTTAAC
GTTCACGATCGGGCTGGGCCATTAAACTTACCTTAGATATTATTTGGAACAGCACCGCAA
GTGCTGATGTCCCAGAAATGGGCGCCGGTTCAATTAGGTCGTGAAGTCAGACATATGGAG
ACTCTCGGACTGAAAGCACTAAGGGATGATAGCTGGCATGCCAATTCCATTTTAAATTTA
CACATCAAGTTACAGGGTTTGGGAAAATCACGTTCAAAGCCTGAAAATTTGAGGTTGTTC
ACGGAAATCATTTGGTTATGTCTGTCGGCCTGCTATTTAGAGACATTTTTTATTGCAACA
ACCTACTCTATGCACTTACACGGAATCGCAGAATAACGCGCGCACAACACAATTGGGAAA
CGATAGGATTTTGAATAGTGTATTGCTTTGTACCGATTTAAATAATTCTTTCTCGTGTTG
AATCCGAGTTGAAGATGAGTATGCTTTGAAGAGGTGAAATATCATCAGTAAAAAAAAATA
ACGACAACTGCAGGACTCGAACCTGCGCGGGCAAAGCCCAAAAGATTTCTAATCTTTCGC
CTTAACCACTCGGCCAAGTTGCCAAAATTGTATGTTATTTGTTGTATCTCAAAATGAGAT
ATGTCAGTATGACAATACGTCACCCTGAACGTTCATAAAACACATATGAAACAACCTTAT
AACAAAACGAACAACATGAGACAAAACCCGACCTTCCCTAGCTGAACTACCCAAAGTATA
AATGCCTGAACAATTAGTTTAGATCCGAGATTCCGCGCTTCCACCACTTAGTATGATTCA
TATTTTATATAATATATAAGATAAGTAACATTCCGTGAATTAATCTGATAAACTGTTTTG
ACAACTGGTTACTTCCCTAAGACTGTTTATATTAGGATTGTCAAGACACTCCGGTATTAC
TCGAGCCCGTAATACAACATTATTTTCAGTGATAAAATATGTAAACCAATTATAAGAAAA
AGGATTGCGTTGCATCACAACTGTAAACCATTAATTAAAAAGAGCAATTGCTATTTAGAT
TTGTTGCTGAGAATTGGCTAAAAAATCTGATAATTGTAGGACTTCTATTATTGCTAGGGG
CAATGTGTTGGAATGCAATTCTGTTGGAATAAAAATCCACTATCGTCTATCAACTAATAG
TTATATTATCAATATATTATCATATACGGTGTAGAGATGATGGCATAAGGTATGAAAAGC
TGTCATCGAAGTTAGAGGAAGCTGAAGTGTAAGGATTGATAATGCAATAGGATAATGAAA
CATATAAAACGGAATGAGGAATAATCGTAAGATTGGTATATAGAAATATAGACTCCATTA
TGGGGATTCCTAGACCCTCGAGGAGAACCTTCAAGTATATTCTGTATACCTAATATTATA
GCCTTTATCAACAATGGAATCCCAACAATTATCTCAAAATTCCCCCAATTCTCAACATCC
GACTGCCATGCAATGTGCTTTTCTGGATCTCACTCATGATCATAATGGCCCTGTAAAAGG
CTCGCACTATTATTATTATATCTTCACTATATATTATTTCGGAGGCTGTACCTATCAGTG
AAAAAACGCCTCTAAAAATGAAAAAAAAAAAGAATATGAAAGGGGTTCTGAATTGCTAAA
ATATTTCGTCAAAGCTCAATTAGTATCATGATCAAGTCGTAATTCGAATCAGCATAACAA
CCTCCAAAACCATATAATAACCTTACACAAGACAAGATATCAATTCAACATGCAAACCCC
TTCAGAAAATACCGACGTCAAGTTGGATACTCTCGACGAACCCAGTGCACATTTAATCGA
GGAAAATGTGGCTCTTCCAGAGGATACATTCAATTCGTACTGGAGTTATATACTTAATGA
AATCGCTCGTTGTAAACCGCTAATGATTATGTTCCTAATACCTGTGTGTTTGGTTTTATT
GATTACGTTTTTTCATGATATCAAAGGTATCCTTGTGTTTTTAGTGATTTCTCTTATCCT
CTCTATTATCATTTTATTGATCGGTATAACTGCCTTCGTGTCTGAGACCTTGAATAAGGG
TTTCATAATTAAGCTTTTAGTAGAAGTCATTACACGTAAACCAGCAGTAGGGGGGAAGGA
ATGGAGAATAATCGCATATAATATGAACCAGTATCTGTTTGACCATGGGATATGGCATAC
TCCGTATTACTTTTTTTGTGAACATAGGTGCCATAAATTTTTCAAAAGCCTTATCAAACA
GACAAGGTCGAATGCACATTTGAGTTCACCAACGAACGGTGCAGAGAATACGCAGTCAAA
CACACCAGCAAAAGAGGTTTCAAATGAGATGGTAAAACCTTATATCTTTAGTTCTGATCC
AGTTTTAGAAGCTTACCTTATTAAAGCTGCGGAAATTCACAAAGAAGCTGAATTTGAGTA
TTGGAGAAAGCAATACCCAGAGGTTGATTTGCCTTAGGGCCGAATTTTTGGTATTTATCT
AGTATATTCTAATATAAAATGTACGAGCATCATTAACTTCAAGAACATTACGAAGCCCGC
AATTAAGTGTCAGTCCATCTGGGTGTAAAAGTTATGTACGCTCGAAACAAATTTTATGTA
GTTTACTTTAGATGCAAATGCTATTATATATTTTGCTTTATGATCCTCGGCTTGATGCTC
GCCAACGTGAGATAGCTGGTCATCACAATAGATCAGCCGGGACGCTTTTCGATCACATCG
AATCCCTTCGGGACGTTGCAACAATACGTGAAAAATGCCTCAAAAATAATAAATACAATG
GTGAACAACGTTAAAAAAGCATAAAACAGCTGGCTATTTTGATCAGGATAACATCTATAA
GTGCCATATTAAGGCAAGATATCAATTGACCATGCAAACACCTTCAGAAAATACCGACGT
AAAGATGGATACTCTCGACGAACCCAGTGCACATTTAATCGAAGAGAATGTAGCTCTTCC
CGAAGACACATTCAGTTCACATCTGAGTTATGTACTTTATGAAATTGCTCATTGTAAACC
GATCATGTTTATGATCATCATAATCGTGAGTTTGATCTCATTGATTGTGCTTTTTCATGA
TAACGACGGGTGCACTGTGATCTTAGTGATGTCCCTTATAGTAGCCTCCATGGCTTTAAT
GGTGGTTGCAGCATTCACATTCGGGAAAGCGATCACTGAACAGGAGTTCATGATAAAGCT
TTTAGTGGAGGTGATCGCACGCAAGCCTGCGGGGAAGGAATGGGGTACTGTCGCATATAA
TATGAACCAATATCTATTCATGAAGAGACTATGGTATACCCCGTACTATTTCTATAGCGG
CAAGAAGTGCCATGAGTTCTTCACCACTCTTATCAAGGAAGTGAATTCTGGTTCGCACTC
GGATTCCTCATCGAATAGTGCCGAGGATACACAATCACCTGTCTCAGCAGGGAAGACTTC
AAATGGTCTAAACAACTTTTATAGTATTAGATCAGACCCTATTTTGATGGCATATGTTTT
GAAGGCAACACAAATAGAAAAGGAGGCTCAAAGTGAATACTGGAGAAAGCAATATCCTGA
CGCTGATTTACCTTGAAGCGGAAGCATTTTATTCACCAAGTATACTTACTTTTCTTTAAA
ACGAGAACAAGAATCGAATTCAAGAACATCTCGAAGCCAGAATTGAGCATCATATATTCG
AGCTGTACAAACATCATGGCCTACAACTATCGTATTTGTAAGTTTTTTTAGAGGTTTTCA
TATTTGTTTAATAAGGGTTCTGTCAGTTTTTGTCACATTCTATTGTTGCGCTTCGCATAA
TGCAGCCAAGAAAATCCAAACAATAGAAAAAGAAAAAAAGGATCTCAAAAAGGGTTTGGT
GTTGTAGTTATAAGAATAACTAGTGAATAAAAAAGCTGTTGTTTGGTCCGTATTACATTC
GTCAAAAATTTAGTACTCAAATCGTGTATGCAATCGCAACCACAAAATAAAAATATTAGA
CTGGATGTGTTGAGTGGAGATGGTGCCAATTTAGTTGAGGGAAATGTGGTCCTTCCCAAA
GACATGTTCAATTCGTACTTAAGTTATTCACTTTACGTGTTACGAGGGGGCTCATTGTAA
GCCGATAATGATTATGTTCCTGGCATCTGTAATTTTGATTTCACTGACTAATTTCCGAGT
ATACCATCTCATGTCCCTTCTATCCTCTTTTTTCATCTCCGGGACAGACCGACAATAAAG
CATCTAATATTAGGCTTTCGTTAGAGGTAAGCACACGCCAGCGTTCGGTGAAAGGGGAAT
GAAACATTATCACGTACAAGATGAATAAATATCTATTTGACCATAAAATATGGAGTACTC
CTTACTACTTTTATTGCGAAGAAGATTGCCACCGTCTTTTTCTAAGTTTTATTGAGGGAA
GAACTTTCGAGAAGCCAACAAGCAACGCTGAGGAAAATGTACAGGAGACTGAAGCTGGCG
AATCTTTCACATTAAATCCCGGAGAAGATTTTCAAAATTGCTTTCCAAGACAGCGGATAT
TGTAGAACAATCTCAAGTGAAGTATTGGCAAGATATTGGTGCAATTATTTGAAAGGAAGG
AGAAATATTCTGACAGTACCTTGCTAGCAAAGGGATTTACCAATCCACTGACGCTAAAAT
GGGGTAGTAAATTAGATAAATTGCATTCTAACGTGACTTTATATAGTGGGAAACAGATAT
GTAGCACACAAAACGGCATGATTATGCTTAATTGATTCCTATTTTTTAACGTAAATACTC
TCCCAGAACGATCAGAAAACTTAACCCGCAACCATCTTTGCTGTGCTAACAACTTATGTC
GCCTCAATACCATTTTTATTTTGTATCATTCCGGAACTTAGTATTGAATGAAAAATGCCT
CCGAAGTAAAAAGCAGGTGATGAAAAGTTTCAATTGGTATAAGACAGATCGCTATTTTGA
TCCGCATAACATCCTTCAACACCATAGCAGAGCTATAGAGAAGACAAGATATAAACTGGG
CATGCAAACATCTTCAGAAAGTACCGACGCCAAGTCGGATTTTCTCGACGAACCCAGTGC
ATATTTAATTGAGAAAAATGTGGCTCTTCCCAAGGACATATTCGGTTCGTACTTAAGTTA
TTGGATATATGAAGTTACTCGTCATAAAGCGGCAGTAATTTTGCTCGTACTTATTGTGAC
TTCAATTTTATTATTAGTGTTTTTTTATAATACGGAATTTTGCGTTGCCTTTGAGATACT
ATTGTTTTCCTTTTGCTTTCCAGGAACATGCATGGTTGTAATTGCATTTAGTGAACCGAT
CGGTGATCGGGAATTTAAAGTTAAGCTTCTGATGGAAATTATCACACGTAAACCGGCGGT
AAAGGGGAAAGAATGGAGGACAATTACATACAAGATGAACCAGTATTTATTTGATCATGG
GCTATGGGATACTCCCTACTACTTTTACCGTGATGAAGATTGCCACCGTTATTTTCTAAG
TCTTATTAAGGGAAGAACTTTCAAGAAGCAAAAGGAATCGTCAGCCAGCAATGTTAAAGA
CGCACAATCAAATGACGAAACCGCTGGCACACCAAACGAAGCCGCTGAGTCTTCTAGTTT
TAGTGCCGGACCGAACTTTATAAAGCTCCTCACCAAGGCAGCCGAAATCGAACAACAATT
TCAAAAGGAATATTGGCGACAAGAGTATCCTGGTGTCGATGAGTTTTTTTAGACAGAAGA
CGGGAGACACTAGCACACAACTTTACCAGGCAAGGTATTTGACGCTAGCATGTGTCCAAT
TCAGTGTCATTTATGATTTTTTGTAGTAGGATATAAATATATACAGCGCTCCAAATAGTG
CGGTTGCCCCAAAAACACCACGGAACCTCATCTGTTCTCGTACTTTGTTGTGACAAAGTA
GCTCACTGCCTTATTATCACATTTTCATTATGCAACGCTTCGGAAAATACGATGTTGAAA
ATGCCTCTAGAGATGAAAAACAATCGTAAAAGGGTCCTGCGTAATTGAAACATTTGATCA
GTATGCAGTGGCACAGAAACAACCAGGAATACTATAGTCATAGGCAATACAAGGTATATA
TTGGCTATGCAGACCCCTCCAGAAAGTACCGACGTCAAGTTAGATACACTTAACGAACCT
AGTGCACATTTAATTGAGAAAAATGTGGCTCTTCCTAAGGACATATTCCGTTCGTACTTG
AGTTATTGGATCTATGAAATCGCTCGCTATACACCAGTCATGATTTTGTCCCTGGTAATA
GGGGTTTTGGTTTTATTAATTATATTTTTTAATGACAACGAAGCTTGTGTTTTCAATTCT
GCAATATTTGCTTTTACTTCTCTTGTAGGTTTGTTAATAATATTAAGTGATGGTAATCCA
AAGCTAGTCAGTCGTCGAAATTTTAGGACCGAGCTTTTAGTGGATGTCATCACACGTAAA
CCGGCGGTAGAAGGGAAAGAATGGAGGATCATCACATACAACATGAACCAATATTTGTTT
AATCATGGGCAATGGCATACTCCGTATTACTTTTACAGCGATGAGGATTGCTACCGTTAT
TTTCTACGCCTTGTTGAGGGAGTAACCCCCAAGAAGCAAACAGCCACGTCAATTGGCAAT
TCTCCGGTCACCGCTAAGCCTGAAGATGCCATCGAGTCAGCTTCTCCTAGTTCCAGACTG
AATTATCAAAACTTTTTGCTCAAGGCAGCGGAGATCGAACGACAAGCTCAGGAAAATTAC
TGGCGAAGGCGGCATCCCAATATCGATGCGCTTCTTAAAAAGACGGAATAGCTTAGAGAC
ACTACCATACGTAAAGCGAACATAAACTAGAGTATGATATATAATCAGCACTAACTGGCC
GGAAAACGGCCGAAGGAAGCCTCGAAAAGTCGATTCGTGTTGGACCCATTTGCTGAACAA
AGTGGTTCATTGCCTACCTATTATGGTAGTAGTCGTGATAATCGTGTGGTTGGTTTTGTC
AACGGTGCATTTGCATTTTCATGACAATAAACCTTGCGTTTTCGTTCTCGGGATATTACT
TTCCCTCCACTTCTTTCGCCTCAATAGCTCCTATAAGCATTCTCAGGGCGTATGTCGGTG
ATCGAGATTTCCAAGCAAGCTTTTAGTGGAAATCATCGCGCGCAAGCCAGCGGTAAAGGG
AAAAGAACGGAGGACGATTACATACAAGATGAACGAATAAATAAATTAATAATAAATAAT
AATAAAAAGTACAGTAGCATTAAATATTATTAAGTTTAATGATTAAAAATTGGTTAATTG
TCAAGAAAATCTAAGGTATTAATAAATAAATAATACTATGACAACTTGCAGCGAAAGCAT
CAGCCCCAATGAAAATTAATCAGAATTGAATCTGAGCGTATTTATTTGATAACGGTTTAC
GTAACTGTTGGAATAAAAATCAACTATCATCTACTAACTAGTGTTTACGTTACTAGTATA
TTATCATATACGGTGTTAGAAGATGACGCAAATGATGAGAAATAGTCATCGTTTTCAACG
GAAGCTGAAATACAAGGATTGATAATGTAATAGGATCAATGAATATCAACATATAAAACG
ATGATAATAATATTTATAGAATTGTGTAGAATTGCAGATTCCCTTTTATGGATTCCTAAA
TCCTCGAGAAGAACTTCTAGTATATCTACGTACCTAATATTATTGCCTTATTAAAAATGG
AATCCCAACAATTATCTCAAAATTCCCCCAATTCTCATCAGTAACACCCCACCCCGTATT
ACTTTTACCGTGATGAAGATTGGCATCGTTACTTTCTAAACGTAGGACGTGCGGAATGAC
AAAACCATCAGCAGTGTCACGATCTCTCCAGTCACAATGGCAATCATGAGTGCATAGTCC
AAAGTAAAGGGGCAAGGAAAAGCATGATTGAAAGGACTCCCCATCTGGACTCTATATGTC
ATCAGCGGCTAAAAAAAAGCATATAGCACAACATCAGCATCAGCATCAGCACTAGAGTCA
TCGGCCCGGCGGTCCGCGGTCATCCCCGCGGACTTTCCGTCCGCCCGGCGGGCTGTATCA
GCGTCAACTGGAACGCGCATATATATACAAGACACACATAACATAGAAGCACACCCACGA
CAATAACCACACGACAATAACCACACCCGCCCACCCCTCCTTTCCGTATACAATGCCAAA
CTTAAAGAGACTACCCATCCCGCCACTGCAGGACACGCTCAACCGCTACCTGGCACGCGT
GGAACCCCTGCAGGACGAGCGCCAAAACCGCCGTACGCGCCGCACTGTGCTCTCCGCAGA
AAACCTGGACGCATTGAACACGCTGCACGAGCGGCTGCTAGAATACGACGCACGGCTCGC
GGAAAGCAACCCAGAGTCCTCATACATCGAGCAGTTCTGGTATGACGCGTACTTGCTATA
TGATGCAACTGTCGTTCTCAACGTCAACCCGTACTTCCAACTGCAGGACGACCCAACCAT
CAAAGACACACCAGAGACGGCGGCACAGGGCCCCTATGGCGCACACACGGTGCAGGTTCG
TCGTGCCGCACGACTCACCACCTCTATTCTCAAGTTCATCCGCCAGATTCGCCACGGCAC
ACTCCGCACAGACACTGTGCGCGGCAAAACGCCGCTGTCGATGGACCAGTATGAGCGGCT
ATTCGGCTCCAGTAGAATCCCTCCGGGTCCCGGCGAGCCCTCTTGCCACTTGCAAACAGA
CGCCACGTCGCATCACGTGGTGGCGATGTATCGTGGCCAGTTCTACTGGTTCGACGTGCT
GGACACACGCAACGAGCCCATCTTCGCCACCCCAGAACAACTGGAGTGGAACCTCTACTC
GATCATCATGGACGCGGAATCCGCCGGAAGCGGATCCGCGCCCTTTGGCGTGTTCACCAC
AGAGTCGCGCCGGGTGTGGTCCAACATCAGGGACTATCTGTTCCATGCGGACGACTGCAC
CAACTGGCGCAATCTCAAGCTGATCGACTCCGCGCTGTTCGTGGTCTGTCTCGACGACGT
GGCGTTTGCCGCCGATCAGCAGGACGAGCTCACGCGTTCGATGCTGTGCGGGACTTCTAC
CATCAATCTCGACCCGCACCAACACCAGCCGCCATTGAACGTGCAGACAGGCACCTGTCT
CAACCGCTGGTACGACAAGTTACAACTGATCGTGACCAAGAACGGTAAGGCGGGCATCAA
CTTCGAACACACCGGTGTGGACGGCCACACTGTGCTGCGGCTCGCCACAGACATCTACAC
AGACTCGATCCTGAGCTTCGCACGCGGTGTCACCAAGAACGTCGTCGACATCTTTAGCGA
CGACGATGGAAAACCATCGTCGTCGTCGTTGGCCTCGGCGGCTCACTCCGCCAACTTGAT
CACCATCCCTCGTAAACTGGAATGGCGCACTGACAATTTCCTGCAATCGTCGCTGCACTT
TGCCGAGACGCGCATCTCGGACTTGATCTCGCAATACGAGTTTGTTAATCTTGACTTCTC
CAACTACGGCGCGTCCCATATCAAGACAGTGTTCAAGTGCTCGCCAGACGCCTTCGTGCA
GCAGGTGTTCCAGGTCGCATACTTCGCGTTGTACGGTCGCTTCGAGACCGTGTACGAGCC
TGCCATGACCAAGGCGTTCCAAAACGGCCGCACAGAGGCCATCCGCTCCGTCACGGGCCA
ATCGAAGCTCTTTGTCAAGTCACTACTGGACCAGGATGCCTCGGACGCCACCAAAATTCA
GCTCTTGCACGACGCCTGTACGGCGCACTCGCAAATCACAAGGGAATGCTCCCAGGGGCT
CGGCCAGGACCGTCACTTGTATGCGCTCTACTGCCTCTGGAACCAATGGTACAAGGACAA
GTTGGAGCTCCCACCCATCTTCCGCGACAAGTCCTGGACTACCATGCAGAACAACGTCTT
GAGCACCTCCAACTGCGGTAACCCCTGCCTCAAGAGCTTCGGGTTCGGGCCTGTCACCGC
CAACGGCTTCGGCATCGGCTACATCATCAGAGACCACTCCGTCTCTGTGGTGGTGTCCTC
AAGGCATCGCCAGACTGCTCGGTTTGCGTCGCTCATGGAAAAGTCGCTGCTGGAGATCGA
CCGCATCTTCAAACGGCAGCAAGCTCGCGCAGCAAAACCCGCTGCCAGGACCACTGCTAG
CGCCAACACCAAATCAGAAGACATGAAATACCTGTTGTCCGGCTACGATTACTTCGACGT
GAGCGTGTCCGGTTGAGTTTATGCTGAGTTTTTGCGCATCAATATTATTTTTACTACTAC
TACTACTACTACTACTACTACATACTATTAAATATACTAAATAAGAGGAAAACGCTTTGG
AAGTGACTGGCGCCGCCGCTGGCTACTATAATAGCAGCGACTGTAATTTAATCTCATCCC
GTCGTTTGGATTACCTCTTTTACTCGCCGAGCGAACGTGCACCAAAAAGGGAAAGGAAAA
AAAGAAAAAAAAAGGAAAAAGGAAACTCAAAACTTGGATAAATAGAAGCACTCAAACTAA
ATTAAACTGCCAAAAAAAAAAAAAATAAAAAGGGAAAAGTTTAAACATCAAAGTACACCT
TTCACCCCTCCACACACCATGGAACAACCTGATCTATCGTCTGTGGCCATCAGTAAGCCG
CTGCTGAAGTTGAAACTTCTCGACGCCCTTCGCCAGGGAAGTTTCCCCAACCTACAAGAT
CTCCTAAAGAAACAATTCCAGCCGCTAGACGACCCAAACGTCCAACAAGTGCTCCATCTC
ATGCTCCACTATGCCGTGCAAGTCGCCCCCATGGCTGTCATAAAGGAAATCGTCCATCAT
TGGGTCTCAACTACAAACACCACTTTTCTAAACATCCATCTTGATCTAAACGAACGGGAC
TCCAACGGCAACACCCCATTGCACATCGCCGCCTACCAGTCCCGCGGTGATATCGTAGCC
TTCCTCCTGGACCAACCAACCATCAACGACTGCGTGCTCAACAACTCCCACTTGCAGGCC
ATCGAAATGTGCAAGAACCTAAACATCGCGCAGATGATGCAGGTGAAACGCTCCACATAC
GTTGCAGAGACCGCCCAGGAATTCAGAACAGCTTTTAACAACAGGGACTTCGGCCACCTA
GAATCTATCCTCTCCAGCCCTCGAAACGCAGAACTGCTCGACATCAACGGTATGGACCCG
GAGACTGGCGATACCGTTCTGCACGAATTCGTCAAGAAAAGAGACGTCATCATGTGCCGT
TGGTTGCTTGAACACGGTGCTGACCCCTTCAAGAGAGACCGCAAGGGCAAACTGCCCATC
GAGCTCGTTAGGAAAGTCAATGAAAACGACACCGCCACCAACACCAAGATCGCCATCGAC
ATCGAACTGAAAAAACTATTGGAAAGGGCCACCAGGGAGCAAAGTGTCATCGACGTCACA
AACAACAACTTGCACGAGGCCCCCACTTACAAAGGCTACCTGAAAAAATGGACCAACTTC
GCTCAAGGCTACAAATTGCGTTGGTTCATCCTTAGTAGCGATGGGAAACTATCCTACTAC
ATCGATCAGGCCGACACTAAGAATGCCTGCAGGGGCTCCCTAAACATGTCTTCGTGCTCT
CTGCATTTGGATTCGTCTGAAAAGTTGAAATTCGAAATTATCGGCGGTAACAACGGTGTT
ATCAGGTGGCATTTAAAGGGGAACCACCCCATCGAGACAAATAGATGGGTTTGGGCCATC
CAGGGCGCCATAAGATACGCAAAGGACAGAGAAATTTTGCTGCACAATGGCCCCTATTCG
CCTTCTCTGGCCTTAAGCCATGGCTTGTCATCCAAAGTGTCCAATAAAGAAAACTTGCAT
GCAACTTCAAAACGGTTGACCAAGAGCCCGCATCTGTCCAAATCCACACTGACACAAAAC
GATCACGATAATGACGATGACAGCACTAACAACAACAACAACAAAAGTAATAATGATTAT
GACGATAATAATAATAATAATAATAATGACGATGATGATTATGATGATGATGATGAAAGT
AGACCCCTCATAGAACCATTACCGTTGATTTCATCCAGAAGCCAAAGCTTAAGCGAAATC
ACTCCCGGTCCACATTCTAGGAAGTCTACAGTCTCGTCTACAAGGGCAGCCGATATACCA
TCAGATGATGAGGGTTACTCTGAGGACGATTCTGATGACGACGGTAACTCCTCTTACACA
ATGGAAAACGGCGGTGAAAACGATGGCGACGAAGATCTAAATGCCATTTATGGTCCCTAT
ATTCAAAAACTACACATGCTACAAAGATCCATTTCCATCGAGTTGGCATCTTTGAACGAA
TTGCTGCAAGATAAACAACAACACGATGAGTACTGGAACACCGTCAACACTTCTATTGAA
ACCGTCAGCGAATTTTTCGACAAATTAAATCGGTTGACCTCTCAAAGGGAAAAAAGAATG
ATTGCCCAAATGACCAAGCAACGGGATGTTAACAATGTTTGGATTCAATCGGTAAAAGAT
CTGGAAATGGAACTGGTTGATAAAGACGAAAAATTGGTTGCCTTGGATAAAGAACGGAAA
AATCTGAAAAAAATGCTTCAAAAAAAATTGAACAATCAACCACAGGTTGAAACTGAGGCT
AATGAAGAATCCGATGATGCAAATTCAATGATAAAAGGATCCCAAGAATCAACAAATACC
CTTGAGGAAATCGTAAAATTTATCGAAGCAACAAAGGAAAGTGATGAGGATTCTGACGCC
GACGAATTTTTCGACGCAGAAGAAGCTGCTTCCGACAAAAAAGCCAATGATTCGGAAGAC
TTAACCACAAACAAGGAGACTCCAGCTAATGCGAAACCACAAGAAGAAGCTCCTGAAGAC
GAGAGCCTTATTGTGATCAGTTCTCCACAGGTGGAAAAGAAGAACCAACTATTAAAAGAG
GGATCATTCGTCGGATATGAAGACCCAGTGAGAACCAAACTGGCTTTAGACGAAGATAAT
CGTCCCAAGATTGGTCTCTGGTCTGTTTTAAAGTCTATGGTCGGTCAAGACTTAACCAAA
CTAACTCTACCGGTATCGTTCAATGAGCCAACATCCTTACTACAGAGAGTATCTGAAGAT
ATTGAGTATTCTCATATTCTTGACCAAGCTGCCACTTTTGAAGACTCCTCTTTAAGAATG
CTATATGTAGCTGCCTTTACTGCATCAATGTACGCATCTACCACTAACAGAGTGTCTAAA
CCATTCAACCCCTTACTCGGTGAAACTTTTGAATATGCCAGAACTGATGGTCAGTACCGA
TTCTTCACCGAACAAGTCTCTCACCACCCACCTATCTCTGCTACTTGGACAGAATCGCCC
AAATGGGATTTTTACGGTGAATGTAATGTTGATTCGTCATTCAATGGGCGCACGTTCGCC
GTGCAACATTTAGGATTATGGTACATTACTATCCGGCCTGATCATAATATTAGTGTTCCC
GAGGAAACTTATTCCTGGAAAAAACCAAATAACACTGTTATCGGTATTTTAATGGGGAAA
CCACAAGTAGACAACAGTGGGGACGTCAAAGTCACAAACCATACCACAGGCGACTATTGT
ATGCTGCATTACAAAGCCCATGGCTGGACCTCAGCCGGTGCATATGAAGTCAGAGGTGAA
GTATTCAACAAGGACGATAAAAAATTATGGGTTCTTGGTGGGCATTGGAATGATTCCATT
TACGGGAAAAAAGTAACTGCTAGAGGCGGAGAACTGACATTAGACAGAATAAAAACGGCA
AATTCTGCCACGGGAGGACCAAAACTAGATGGGTCTAAGTTTCTGATATGGAAAGCAAAT
GAAAGGCCTTCAGTGCCATTTAATTTAACGTCGTTTGCATTGACTTTGAATGCTTTGCCA
CCCCACTTGATACCATATTTAGCACCCACAGATAGTCGTTTAAGGCCCGATCAAAGGGCT
ATGGAAAATGGTGAATACGATAAAGCTGCCGCGGAAAAGCATCGTGTTGAAGTAAAACAA
AGGGCAGCAAAAAAAGAAAGGGAACAAAAAGGAGAAGAATACAGACCTAAGTGGTTTGTC
CAGGAGGAGCACCCCGTTACCAAAAGTCTATACTGGAAATTTAATGGAGAGTATTGGAAC
AAAAGAAAAAATCATGACTTTAAAGATTGTGCTGATATTTTCTAAGCTGTGCAATGTAGT
CACAATAACACTCGTTCATTTGTATCCATTGCGAATGCCGGTACATCGGAAAACAGGATA
GGACCTATTTAATTATATAGTATGAAGTATTCATAACTTCTTGAGGCATCAATACATCAT
ATTCCATGAGCTGCGTGGCATTCATACTCATTGATTTAAAGGTTTTTTATTTTCATGGAA
AAGATTAACCGGGCTGAACGAAATATATTAAAGATGCTAAAACTTATGCTTTCATTGACT
TTCAATAGTGTCCACTAACCAAAAAAAAAAACTACTCTAACAAGGGATCCCCATGGATTC
AAAGCCGATACCAAACAGATATTACTCTGCATAGAATTCAAAATATTATCCATATAAAGA
TGGGAAAGAATTCCAAAAGGAAAATTCTGCTCTAGAAGGTCACAAAACTAGTAAGAAGTT
GACCCCCCTGCCATTAAAAAACGTTTTTAACAGCTCTAGCAATATTCTAATTTCGAAAGT
GCTCTCAAAAGAATTTATTCATTTGCGAAAAAAAGAATATCTCAAAATTTTCTCGATCAC
GTACAACATCGTAGTATTTAAAGGATTATTAAGTCAACGAATAATTTCCACAAGAAAGGT
ACCTCTAGTTTTGGTGATGAAGCAAGACAATAACTGGCAAGGGCTCTCACTAAATATCAA
CCCCTTTCAAATAAAAAAAGGATCATGGCTGGCAGCGCCCACAACAATTAAACTCTGTTA
CTATCAAAAAACATTGAGCCCAAGAATGGAATAAAATTTTCACTACACCTCGGACATGGA
TTTGTACATGTCCTATTATCCTGTAATTTTGACATATACTGATATGGACCTCTTGTTTCG
TATAAATCGCTATTTATTTCCCCAGATAACTAAAGAAAATCCTTCAACCCAGCGTTCTAT
ATTACTATATTCTCAACCCGCCGTTTTCCTGCTGTGCGATAATTCTCATTCAATACTACC
ATTTCAAACCTAGAAAAGGGTGTCTTTATTAAAACTGTAAGAAAATTTTATCATGAACTC
TGATGAAAAGTCTTCGGAAGATCAACTTTTTGATTTTTCAAAAATGAAAGAAACTGTTGT
CTCCATTTATGGCCTCATATCTGAAGGAAATTCGTCTGCTATTAGTCATACCACTATCTT
CTTCTTGAAGCTGCATTTCAAGGTTGATTAGGAAGCATCTAACAATCATTCGATAGGGAA
AACAGAAAGGCCGTTACAGTTTTTTAAAAATATCAATATCAAGAGAAAGAACTAGGGATA
TTGCAAAATCAAAACTTCTGATATTTGGTTTTACGTGAAAATTACCAACACTTAAACGTT
AAAATTTCAAACTATCTACTGAAATATAAATTTTCAGTCAAAGAGATGAAACGATTATTT
TCTTGAGTAATTCGTTGTCACAATTTAACAGAAAATTACTGTTTTTTTCAAGTAGTTCAC
AAAGATACTCAAACTAAGATCATGGAGACGTCGGCAAGCAATTGATTGTTAGTGATTATC
AAAACTCATTAGCTTCGGTAAAACTACATAGATTGAAAATCAGTAGTAACATACAACATG
GTTTCCATGAGATTACAAACCGGCCAACCTAATGCTTTCAAAAATTCTTTGCTTACTGAT
TCACGGTGGCCAAGAAGCATATAAATCTGTACTTTGCAGTAAAAAACAGATGGTATTGCT
CATTCCCAGCGATTGCCAAATACGATTCATAACAGATTGACTTATCTTTTTCGAAAGCTC
TATCATATGGCTTTGAGTAATAAGGTGAGATTTTTTTGGTGATGAAAATAAATACGGTGC
CTTGATGCAAAATTTTTAGCCACAAACCTCTCTTCAGTCCCACATGATTCACCTGATTAC
GACTCACTATTTCATCTGTTCCATAAATCTCGGCTTTTTATATACAGAACATTAGACGAC
GGGAAGAGAAAAACGTCAGTATAACCCACTTTTGTTCGTAAAAAAAGGTTATTCACTTCT
ACTCCGTACTAATCAATGACTTTAATGGTGAAACCATGATGAGGAGAGTAACACGATGTA
ATTGTCATAAACTAATATTATCCCATATTAGTTTACTGACGGCTACAAGTGAGAATATAT
ACTTTAAGAGTGTAACCATACCAGTAATTGGGTTCCAAACAAGTTTGTGAGGCGCGTGTG
CTGAAAGTAAAAAAAACTTACCTTAATAACGCAATTTCTGGCGAGGTTAAAATATTAAAT
ATAAAAAGCCTTCCAAGTAATTTTGCCCACTAAAATGTAACACAAAGCTCCACTGGTTCT
CGGCTTCTTGTTCTTTCAAAAGGATCTTCAAATCCGCTTCCACTTAAGCAGCCTTCTGCT
ACGACTTCTTCTGAGACACTCGGTTTCGCGCGGGCACTTCTGCCCACCAAAAAAGTTTAT
TTTCCGGAAAGCTTATTTCTAAATAAACTTCTGAGGAATTTTTTTTCCGCAAATTTCCAT
GCAACGTCGAACTCTCAAATTCTCACGAGATTATTTGACTTGCTTTCCTTTCCCCCTTTT
TCCACGCACTACGTCAATGCAAGTGATCCGCTTTTGAAGAAGCAAAAAATACTTCTTTCA
GCTCGTACCGGCATTTTTATTATTTGTCAAAACTGGCGTTTGGAAACCAGCTCTTCACTT
TTTCTTCGTGGTTTCTTCGTGGTTTTTTCGAGAGTTTTGTTTAAGCCCCTTTTATGGATG
CATGAGAAAAAAAAAAAGGTTTGCTACAACCATCTCAGGTCTCTTGAAGGATAGTTCGAA
GCTCGCCTGACCGTCTTTGGGTGACCAGGCTTGGTTTTCAGTTTTTTTTAGCTCATTGAG
ATATGTGATCCCGTTCCTAGATATTATGAGGGAATTTTATATATCAAATTGATTTTCACC
GCGAATTCCAGAAGGATGGGCAAAAGAGGGCTTGTTGGCGTGGGAGGATGGTCGCGGCTG
AAAATTTTCACCACGAGCAGTTTCTTGTGAGACATCCTAATACTTTTGCATTTTTACCAA
GCAGTCGTCCGTAGCAAAGCATAGGTTAGTAATAACAATGTGCAAATAAAAAACTATCTT
ACAGGCAATTATTTTGTGGCAAAGCAAGGTCCATGTTTTCTTGAAAGGTAAGAAGTGGCT
TTGGGACAGCTCATATAGACAGATTTAAGTTTTTGATCTGAGAAGCGAATGAAATGTCTT
CAGTATCATTCAATTTAGCATCCTTTTCATTGACTTTGAATGTTTTACCGCCCCAATCAA
TGCCATAATTAGCACCCCATGGATGGTCGTTTAAGGCCTGAAGAGTTATGGAGCATTGTG
AATAAAATAAAAAATTACTTAGGAAAAGCATCGTGTTGAAGTAAAGCAAAGAGCAGCAAA
AAATAAATGGAGTAAATATGAGAGAAATACAGATCAGAATGGTTCGTTCAAGAGTCCATA
CTATAAACCCGATGGTGACTTTTGCACAAAAAAACAATGGTTTCGAAGATTGTGCTCATA
TTTTCTGAGCTCAACATATGCTCGCAAAAACACCTACTAATTGATGTTTACCAAGAACGC
GAGTACAGTCATATATAGATGTAGTAGAGTTGAGATATTCTGAATCGGAAGTACGATATT
TCAATTCCTATATTGCAAAAATTTATATATTTGGAGCTTCTTGAAAGAAAAAGTGTCCAA
CATCCTGCATGAAGTTTGATCACTTTAGCTGGTCCCATTCGAAGAACCTTTTTTTTTTTT
TTTTTTTTTGAGATTCTTCATATTCTGTTATTAAATTTTTAGACTTTAATTTTTACTTTC
TATGTAACGTTCACTCTTACCCTAAATATTAAACTATTTGATAAAATATTACACTGAAAG
GTGTTACAACTTTTCCTAGACCAACCTTAATATAAACGTTACGATATAAAATAAACAGTA
ATTTTAAGATTCCATTGTTGAATGTGACACGTAACTCTAGGCCATACCTGGTTTAGTATT
TTTTAAAAGAACTCTTGCTACAGCATATTTTACGTTTGCATAAAAATAAAAGAAAAGCTT
CCTTATGAAACACTGGTTAAGAAAAGAAAATGGAGTGGTTACATACTCCAAAATAAATTA
CTCTTAATATCTGTTTATCCAATGAGGAGCAGATCTCAAAGATAATCAGACTTGTTATTG
AAGCAATTGAAGTAAGTCTTCCATTGAAATCACGCTAATTATTAAGCAATATGGTGGATT
AAACAACTCTGACGGGACCGTACTACTTGATGAAAAGTTATATACAATATTGAATAACAG
CATAATGCTGTATGATGTTGAGCGGAAGATTGTATAAAAATGTCCTTTTCTAAAATCATG
AAAAACGAACCCTTTAAAGTAATTTTGTAGCGAAATTTAACCTCACGAGTTCATGATCAT
AACTCGTTATCATTTTTGTAATATTGAATCGGTCTCTATAGAGCCTCATGAGAAGATAGA
GGACCCGAAATAATTCTCCCTTCAAACATTATGGCCAATAAGTGTCAGGAAGTGAAGCAT
TGACATGACAGCAGCACATTAAAACTCTATTGAATATAAATACGATCCACGACATGTCGT
TTACAAAGCGCTAAAAACTCATGAGCCAACTATTCCCTAAATTTCCAAGATCTATCATAT
ATTTTTCCCTAATTTTCCAAGAGGAACCTCCATAAAATAATGCAGAAAAACATTTGTTTG
ATCTATTTTAAAAGGCATATCGCATGTTATAGTGAATCTGAAGATTGCTTCTCTCGTCAG
TATTAATGCACTATATTACGTTTCAAATAATTCGTAGATTGTCTCAAGTTTTCAGTATAT
TTGCCTTCATGACCCACCGGTCCTCTTCCCTCAAGTGCTCAACGATGGGAGCTTCAGAAA
AATCCAGCAGCATAGTTGAGTTCTGATTCTCTCCTTGGTAGTTTTTTCCTTTGGTGATTT
CGGATTCATAATGAAAATGTTTCGTATATTCTATGACTAAAGTTGTTATTGTTGTAAGTA
TTTCTGCTTCCTCTTGCAACAATTCCGCTCCCACTTATAATGCACCGAGGTGAATTGGTC
ATCCTTACGAAAATACCCAGATAGAAATGGAGTAGTTGCGTGATCGTTTACTGCATCTTT
TGCGCCTTTTAATCAATCTTGACGTGGATATCTTGTTTTGCTTGAACCACCACCTGTATT
GCTGGTATAAATCACCATATTAACCATCGTTTTCAATCAACGCAACTTTTAGTGTATTGT
CTGCAACATCTGATTTCCCTCTGGTAAGTCACCTAATCTAAAATCTCTATTTTGAATCCA
CGGAGACATACGTTTGAAAGATATAAAAGAGTTCATTGAAAAGTCTAGCGTCACAACTGA
CATTAAAATACTTAAATATGAACCAAAATTTTTTGGCTTTTATTTTCAATGCAATCATTA
TCTGCCTATACAGGAAACGCTTTATTTGGCTCAATAATATGATCATGTTTGTCTGAAGTT
GGCAATAAAAGAAACTAAGAAGAGCCACTAAACTTATTTTATGATATGGGAAACACAGAA
AACACTCCAAAAATTTTGGTACAAGAACCTGAAAATAGAACAAAGAAAGAGGCGAGGTTT
GGTACATCTAATTTACGTGACCTAGACGTTGCTCACCTTATGTTAATAGCTTATCAGAAT
TACAAGTAATTACTTGTAGGAACATCCTCTACTAGTGAATATGAAAGAGCAGAGGTTAGC
TCCGTCTCAACCAATTTTGTACAAGTCGTTGAAAAGGACGGCTCTACTGTAGACAGGTCG
ATTCAAAGTCTGGTCTCAAAATAGAAGGTAAAATATTATTGAACAAAAGACCACTAAAAG
GCTATGGTATGTCCAATAAGATGCAAAATAGACATTTCACTCGCTAATCGTTAGTGGGAT
TATATCTTACTATACTCCTTATCTCATTGAATGGCACTAGTCGATCGAGGAACAAAAAAG
GATCGAACCGATTAGCACGGATTTCCTTAAGTAATTTAAATTACCAAAGAAGATCCACAT
CAGCAGTCGAATGTTCAAGATGCCGTAAGTTTAAAATCTTTCGTATCTTTCCCCGATCCT
GTCTTTCATCAATGAACTTGAATATCAAGAGTGAAAAAAACTCATATGGCTTCTCTTGAA
GAGTTAGAAAGATAGGCACATGCCAATTGTGTGCATAGCACTTACTACTCAACGATTTCA
CAACCTAGCATAATACGCGAAAAAAAAAGTGCATTTATTTAGGTAAGTCTCATTACCTAA
ACGCCAGTTTGTTTCACGTAATTGGTAACGATGAGGGAACCGCAGTAGAAAAAACTTTCA
TTCACAAACGATTAAAGTGTTATGCTAGCCAGTTTCAGGCTTTTTGTTTTATGCAAGAGA
ACATTCGACTAGATGTCCAGTTAAGTGTGCGTCACTTTTCCTACGGTGCCTCGCACATGA
ATGTTATCCGGCGCACGATACTTATCACCGAAAAACCTTATTCTACGGAAAACCTTATTT
ACATTAAAGTTGGAAAAATTTCCTCTTTTTCCTAATAAGGTGGAGCTTTTGGCTTCCAGT
ATGCTTTCACGGAATTATTTCTCATGTACATTTAGCTCCATTTCCAGTGCCTCCGATAGG
GAGGCATCATGGTACTACCGTGACGGAGAATACGTAGGCTGACTTTTTCGTCAGTTTGTT
GTCCGTTTACAAAATTGGTGAATGAATTCTAGCCTTCCTCTGCTCATTAATTGCCCTCAC
AAGAATTTGGAAGTGCGTAGAACAGGTAAAAGATTGTACTACAGAGGTATTGTGGAACCT
TCTACAGTACTTCGGAATACACCTAAAAGGTTGTTGGATGCTAAATTTAGCAAAAGTCTT
TTTTAGCTCACTATTAGGCTTGTTAAAGTCTGAAATTGTTGAAAGGCACTCAAAAAGATA
AATCAACAATCAGCATTAACGGCACAGTTGAAAGAGTCACCCACTTGAAATTAGCTCGGT
TATCAAATATAATTATCTCTGGTAAAGAGCTCTGCAGCAGGGTTAATCTATTCGCATACT
TACGCTGTAGGAACATTTTATTATTAGGATCCGACTACTGCCTACATATTTATTCGGAAG
GCATGATGTCGAAAATTTTTGAGCTTATAAAAGGAACATATTTCACTCTTGCTCGTTTGA
TGTAAGCTCTCTTCCGGGTTCTTATTTTTAATTCTTGTCACCAGTAAACAGAACATCCAA
AAATGACAATGCCTCATCGCTATATGTTTTTGGCAGTCTTTACACTTCTGGCACTAACTA
GTGTGGCCTCAGGAGCCACAGAGGCGTGCTTACCAGCAGGCCAGAGGAAAAGTGGGATGA
ATATAAATTTTTACCAGTATTCATTGAAAGATTCCTCCACATATTCGAATGCAGCATATA
TGGCTTATGGATATGCCTCAAAAACCAAACTAGGTTCTGTCGGAGGACAAACTGATATCT
CGATTGATTATAATATTCCCTGTGTTAGTTCATCAGGCACATTTCCTTGTCCTCAAGAAG
ATTCCTATGGAAACTGGGGATGCAAAGGAATGGGTGCTTGTTCTAATAGTCAAGGAATTG
CATACTGGAGTACTGATTTATTTGGTTTCTATACTACCCCAACAAACGTAACCCTAGAAA
TGACAGGTTATTTTTTACCACCACAGACGGGTTCTTACACATTCAAGTTTGCTACAGTTG
ACGACTCTGCAATTCTATCAGTAGGTGGTGCAACCGCGTTCAACTGTTGTGCTCAACAGC
AACCGCCGATCACATCAACGAACTTTACCATTGACGGTATCAAGCCATGGGGTGGAAGTT
TGCCACCTAATATCGAAGGAACCGTCTATATGTACGCTGGCTACTATTATCCAATGAAGG
TTGTTTACTCGAACGCTGTTTCTTGGGGTACACTTCCAATTAGTGTGACACTTCCAGATG
GTACCACTGTAAGTGATGACTTCGAAGGGTACGTCTATTCCTTTGACGATGACCTAAGTC
AATCTAACTGTACTGTCCCTGACCCTTCAAATTATGCTGTCAGTACCACTACAACTACAA
CGGAACCATGGACCGGTACTTTCACTTCTACATCTACTGAAATGACCACCGTCACCGGTA
CCAACGGCGTTCCAACTGACGAAACCGTCATTGTCATCAGAACTCCAACAACTGCTAGCA
CCATCATAACTACAACTGAGCCATGGAACAGCACTTTTACCTCTACTTCTACCGAATTGA
CCACAGTCACTGGCACCAATGGTGTACGAACTGACGAAACCATCATTGTAATCAGAACAC
CAACAACAGCCACTACTGCCATAACTACAACTGAGCCATGGAACAGCACTTTTACCTCTA
CTTCTACCGAATTGACCACAGTCACCGGTACCAATGGTTTGCCAACTGATGAGACCATCA
TTGTCATCAGAACACCAACAACAGCCACTACTGCCATGACTACAACTCAGCCATGGAACG
ACACTTTTACCTCTACTTCTACCGAATTGACCACAGTCACCGGTACCAATGGTTTGCCAA
CTGATGAGACCATCATTGTCATCAGAACACCAACAACAGCCACTACTGCCATGACTACAA
CTCAGCCATGGAACGACACTTTTACCTCTACTTCTACCGAATTGACCACAGTCACCGGTA
CCAATGGTTTGCCAACTGATGAGACCATCATTGTCATCAGAACACCAACAACAGCCACTA
CTGCCATGACTACAACTCAGCCATGGAACGACACTTTTACCTCTACATCCACTGAAATCA
CCACCGTCACCGGTACCAATGGTTTGCCAACTGATGAGACCATCATTGTCATCAGAACAC
CAACAACAGCCACTACTGCCATGACTACACCTCAGCCATGGAACGACACTTTTACCTCTA
CATCCACTGAAATGACCACCGTCACCGGTACCAACGGTTTGCCAACTGATGAAACCATCA
TTGTCATCAGAACACCAACAACAGCCACTACTGCCATAACTACAACTGAGCCATGGAACA
GCACTTTTACCTCTACATCCACTGAAATGACCACCGTCACCGGTACCAACGGTTTGCCAA
CTGATGAAACCATCATTGTCATCAGAACACCAACAACAGCCACTACTGCCATAACTACAA
CTCAGCCATGGAACGACACTTTTACCTCTACATCCACTGAAATGACCACCGTCACCGGTA
CCAACGGTTTGCCAACTGATGAAACCATCATTGTCATCAGAACACCAACAACAGCCACTA
CTGCCATGACTACAACTCAGCCATGGAACGACACTTTTACCTCTACATCCACTGAAATCA
CCACCGTCACCGGTACCACCGGTTTGCCAACTGATGAGACCATCATTGTCATCAGAACAC
CAACAACAGCCACTACTGCCATGACTACAACTCAGCCATGGAACGACACTTTTACCTCTA
CATCCACTGAAATGACCACCGTCACCGGTACCAACGGCGTTCCAACTGACGAAACCGTCA
TTGTCATCAGAACTCCAACTAGTGAAGGTCTAATCAGCACCACCACTGAACCATGGACTG
GTACTTTCACCTCTACATCCACTGAGATGACCACCGTCACCGGTACTAACGGTCAACCAA
CTGACGAAACCGTGATTGTTATCAGAACTCCAACCAGTGAAGGTTTGGTTACAACCACCA
CTGAACCATGGACTGGTACTTTTACTTCTACATCTACTGAAATGACCACCATTACTGGAA
CCAACGGCGTTCCAACTGACGAAACCGTCATTGTCATCAGAACTCCAACCAGTGAAGGTC
TAATCAGCACCACCACTGAACCATGGACTGGTACTTTTACTTCTACATCTACTGAAATGA
CCACCATTACTGGAACCAATGGTCAACCAACTGACGAAACCGTTATTGTTATCAGAACTC
CAACTAGTGAAGGTCTAATCAGCACTACAACGGAACCATGGACCGGTACTTTCACTTCTA
CATCTACTGAAATGACGCACGTCACCGGTACCAACGGCGTTCCAACTGACGAAACCGTCA
TTGTCATCAGAACTCCAACCAGTGAAGGTCTAATCAGCACCACCACTGAACCATGGACTG
GCACTTTCACTTCGACTTCCACTGAGGTTACCACCATCACTGGAACCAACGGTCAACCAA
CTGACGAAACTGTGATTGTTATCAGAACTCCAACCAGTGAAGGTCTAATCAGCACCACCA
CTGAACCATGGACTGGTACTTTCACTTCTACATCTACTGAAATGACCACCGTCACCGGTA
CTAACGGTCAACCAACTGACGAAACCGTGATTGTTATCAGAACTCCAACCAGTGAAGGTT
TGGTTACAACCACCACTGAACCATGGACTGGTACTTTTACTTCGACTTCCACTGAAATGT
CTACTGTCACTGGAACCAATGGCTTGCCAACTGATGAAACTGTCATTGTTGTCAAAACTC
CAACTACTGCCATCTCATCCAGTTTGTCATCATCATCTTCAGGACAAATCACCAGCTCTA
TCACGTCTTCGCGTCCAATTATTACCCCATTCTATCCTAGCAATGGAACTTCTGTGATTT
CTTCCTCAGTAATTTCTTCCTCAGTCACTTCTTCTCTATTCACTTCTTCTCCAGTCATTT
CTTCCTCAGTCATTTCTTCTTCTACAACAACCTCCACTTCTATATTTTCTGAATCATCTA
AATCATCCGTCATTCCAACCAGTAGTTCCACCTCTGGTTCTTCTGAGAGCGAAACGAGTT
CAGCTGGTTCTGTCTCTTCTTCCTCTTTTATCTCTTCTGAATCATCAAAATCTCCTACAT
ATTCTTCTTCATCATTACCACTTGTTACCAGTGCGACAACAAGCCAGGAAACTGCTTCTT
CATTACCACCTGCTACCACTACAAAAACGAGCGAACAAACCACTTTGGTTACCGTGACAT
CCTGCGAGTCTCATGTGTGCACTGAATCCATCTCCCCTGCGATTGTTTCCACAGCTACTG
TTACTGTTAGCGGCGTCACAACAGAGTATACCACATGGTGCCCTATTTCTACTACAGAGA
CAACAAAGCAAACCAAAGGGACAACAGAGCAAACCACAGAAACAACAAAACAAACCACGG
TAGTTACAATTTCTTCTTGTGAATCTGACGTATGCTCTAAGACTGCTTCTCCAGCCATTG
TATCTACAAGCACTGCTACTATTAACGGCGTTACTACAGAATACACAACATGGTGTCCTA
TTTCCACCACAGAATCGAGGCAACAAACAACGCTAGTTACTGTTACTTCCTGCGAATCTG
GTGTGTGTTCCGAAACTGCTTCACCTGCCATTGTTTCGACGGCCACGGCTACTGTGAATG
ATGTTGTTACGGTCTATCCTACATGGAGGCCACAGACTGCGAATGAAGAGTCTGTCAGCT
CTAAAATGAACAGTGCTACCGGTGAGACAACAACCAATACTTTAGCTGCTGAAACGACTA
CCAATACTGTAGCTGCTGAGACGATTACCAATACTGGAGCTGCTGAGACGAAAACAGTAG
TCACCTCTTCGCTTTCAAGATCTAATCACGCTGAAACACAGACGGCTTCCGCGACCGATG
TGATTGGTCACAGCAGTAGTGTTGTTTCTGTATCCGAAACTGGCAACACCAAGAGTCTAA
CAAGTTCCGGGTTGAGTACTATGTCGCAACAGCCTCGTAGCACACCAGCAAGCAGCATGG
TAGGATATAGTACAGCTTCTTTAGAAATTTCAACGTATGCTGGCAGTGCCAACAGCTTAC
TGGCCGGTAGTGGTTTAAGTGTCTTCATTGCGTCCTTATTGCTGGCAATTATTTAATAAA
ATTCGCGTTCTTTTTACGTATCTGTGTATCTTTTCTTTGCTAATTATACGCTGACATGAA
TTATTTTTTAACTGTTTCTCCTCCATACTTTCAAATATTCAAATTGACTAAATGATAATT
CTTGCGCTTCTTATTTTGAAAAAGTAGATATGTGTATCATAAAGAAAACGTTATTATTAT
TGTCTTAGGCAACAAAAATCCATGAAAAGAATTTTACCGTTATCGATATCATTGTATTTA
TTTTATTTATTTATTCAATTTTTTTTTTTTTGGTTTATATCCTGCAAACAACACTTCGAA
TTCAATTCGATATTTCATAAGTTACAACTAACACTTATAGAAACCGATGTATGAGTACTT
ATTATTAACGAGGAAAAATGCCCTATTTTCTTTAGCAATTAATGAACCATCGCCAACTTT
TGCTTTAACAATTATTGCCATTTTCAGCAGTACTAACGTAAGATCTAGTGTGGTTCGCTT
AGGATGTTTTCGAGTAGAAATCTGCTGCACATGCCACACGCAGTACTTGAAACTTGAAAT
AATGGTGATAATTAGTTATTTAAAGTATGTTAATCTTCCTTGTTCTTTTATATTTATTTC
GAATTCTTTTGCACTAGTATTTAAAATATCAGCAGAGGTGTAAAAGTGCACCAAAATTAT
TGTAAAACTACTTGCCCTAAAATTGATACTTCATACTTGACATATTCAAAAGGGGTCCAA
GTATAGATGCATCAAAAAAAAAAATTATCCGATGATGAGCAAATGGTAGCTTTTCGTTCC
CAGGAAGTGTAGTAGTTCCATGAAGTCTAATGAGACTTTGGAAAAAGGTTTGTCACGAGC
ACCTAACTATTGTATTTTGGAATTTTGATAAACTTCAAAACGGGAACGAAGTGTTAAACT
TAGATGCGGTTGATTTAAGCTTTAAAAGAGGAAAATAATGACTGATGATAAGAAGTCAAC
AACGATTCAAAGCAGGTGAATTTCCATTACGTTTCGCTTTTCAATTGAAAAAAATTTGGT
GGTTATTCATTTCTTGCTTGACCTCTTTACTTTTTATACTTCTGTGATGAGAAGCAAGTT
CGAGGATTTTACGATAAAGCCTACTGGTTATATTTGTATAAATTAGAACGTTGTCCTTAT
TTCTCTTTTCGAACAGTATCAAAATAAAGTTTTTGATTAGGGCCAGATTCTCTTCAAGGA
AGAGATACCTCACGTCTGTAATATCTAAGAGCTAATGTTTCGATCGAACTTTCCTTTGCT
TTTTTTCTGGATCTCATAATGTCCCACTGTATGTATGTGCCCTCGCACAGCTTTGCTCAT
CATAGACATTAATCATTGGTTGTACGATAAAAATATCGCAAAAATTATTCTAACGTTCAG
ATTAGATTCCGGCCATATTTCTGACATTTGTTTTATTAATAAAAATTTGGCGAATGTTTT
GATAACTTGATAACTGCTGATATTTCATTGTTGAAAAGGCATGATATTAGATGCACAAAG
TATATTATAACTTATTATCAGAGATATAGGAACAAAAAAAAAGGGAAATTCATATCTATA
TGTGAAAATACCATTATTTCCTCTTCTATTTAATATACTGTCCTTAATTTTCATATTACA
TTATCAACTTTTGCATTTCAGTGTCCATTAAATCTTGGGACCATTTTCTCAATCTTCATG
TCGTGTTTTCACACCGTATATAATATACTGGTAATATAAGTACTAGTCGATAGATCGCAG
TTGAGTCTTATCCCAACAGTTAATGATTCACTGTGCTTTCTGTTGCTGTAGAATTTCTGA
GGCATTGTCGCTCTCTTCTATGTGATGCTACAACGGAACTAGGCTTCTTATATATCGTGG
TCCTACAAGATCTTGGTATCTCGTTTGCTTACTTTGAAGCTTCACTGATATATAGTATTT
AAGCCACTTTCATGTTCATGGATAATCGTAATTGTACTACGCTGGTACCAGTTATGAACC
CTATCAAATCATCATTGAACACTGCTATTTTTAACTAATCAAGATGTGTATGCGGCGTAC
TTTATAATTTCACGACACTATTGAAAGCAAACTAAAAATCAAGTAAATACCTATCCAAGT
TGCGGGCTCTGGATTTATGTGGCCTTAAATTTTCGACCTATGGTTCGCTATTCAATATGA
GAAAACCAAAATTAGGTACAAGTACTGATTACGTCCGTGATTCGAAAAGCAGCGTTGAAA
GATTACAAGATTTTGCGTGTCCAGGCCGACACTTAACTTTAAGGTCTCGACTTAGTAACA
TGAGTTGCCAAAAGTTTTTTTCTCCTATCTGAATATGGGGAACCGGAATTTGTCTTTGAC
CTGACTTTCAAATTGTTGCATATGTAAAAAAAAACAGAAGAAATATGATCTTCTTCTTCT
AGCGATGCAAAAGGATTCATTACAAATCGTCGCAAAGGCCGACAAGTTGCAGTATATTCA
CATTGCTTATTTGAAGTATGTTTGTATACACATCGATAGTATTCATTAACACCACAACTG
CTGTGTATACTATGTCAAACAGCATAATAAAGCCCGTCATTTTTGTACCCGCTCATTTCC
AATAGGCATCTAAACTTACAAATGTGGTACACTACTTCGAATTCATTAATCGATATTGAA
TGCTAAAAGTCTGCGATTTCTTCCTCAACGTTCAAAAATCTCATCCAAGGCATAATCCCA
CATATTGAAGATCGCTACCAATTGTTACGGGCGAACTGAGGTTTTGGAAATGAGCTTGTA
CTTAGTAAATTTCTCTTTGCTTGCATCTTTTTCTTCCATGCCAAAAAATAAAAGATACTC
ATTTTAAAAGCGCAGCCATATTGACTAAGTAAGTAATCATAATACTATGAGTAATTTTTG
AGTACTGTGCTCATTTACTAGCTGCTTTTCTGAGAAAGATCCTCGATAATCAATTCCAGG
TTAGTGGGGCCCTTCTACGGCTTCTTCTAACCAATTGTTCCCCGTGAGTTGCTTTCTCTG
AAAACCTTATTATACATTAGAGTTATAAGAAAATTTTCTTTTTCCCGTAGATTAACCTGC
AGTGCCGAACTTCTAGATGTCACACCAGACCGTTTGACACCGCCATTTTCCTTCCTTTTC
GGAAAAATGTGCCGATAAATGGTAAGACGCGACGCCACTGCTACGAATATTACGCTTATG
ATGAAGCAAAAGGAAAAAGCAAGTTCCCCTTAAATTCGTATAACTGTTTCATCAATCTTT
AGTTCTGGCATTTGAAAGTTAATTAAACTTTTCTTCGTGGTTTCTACAGGAGTTCTGCAT
GTGCGTAATTCAAAGCCTGTGAAGGAAAAAGTATTGTCCTAAACAACGGTCGTAGAATAC
GTCAACTGTAGTTTAAAATATTTTCTGGCTCTACTCGGTGCGATAGGTCTGGCTCTTTTC
TATTTACTTTTGTTTGGAGTTGTTGAGGCCGATACCCGTCTAGATGTAAATATGAAATAA
CAGTTCGAGGTTTTATTACGAGAATGAAAAGGGTAATGGATTGGAGCATGTGTAAATGTC
AATAGCAGAAAAAATTTACCGCAAATTGTTTCGTAGTCTTATCTTCATCGGACACTCAAG
GGTTGCATAATTTTTACCCAAAGGAACAGTATACTTTTTTGATAAAAAAATCTTGTTACC
TATACAGTATTGCAAGCATTTTCAGAAACTCGTCTTTTGAGTTCTAAATGCATCATACAA
CAACAACAACAATTTCTTATTACTGTGTCCTTTTGGGATTTTTCAGCCTTCCTAGCTTAC
CCAAAATAGCCTCTCAAGGTGAAAAAACCATGCCTGCAAGCGGATCTAAGGATGAGTAGC
TAGATTACAATAAATCCTGAATTTTCTCTGAGTGTCAACTTTGTCATCGCTTGTTAAAGG
GCTACTACGCTGAAAAAGAACCTGAACTCTGTTAATAGGTTGAAGATTTTATGACTTGGT
ATACTATTCCATACGGCTGCTCTCCTGATTGCGGTGGGTCATTGCTATAACAGTAAAATC
AAGGAAGATAACAGGAAGAGTAACTTTAGTACAATAAATCTGTTGTCTTCCCGAGGATTA
TAATTGTTCGGCTTTCACACTAAGTTGAAAAGGGGGACTCAGGAAATGACAGGGTACGTT
TTAGTTTCTCCAAATAAATCTTCCACACCCAGCTTCAATGTGGTAAACGGGGGAAAGTTG
ATTAATTGATGTTGGCACTTATATTTAACTGATGTAGAGAAGAACAACATACTACTAACG
TCACAGTCAATTGTGCCAGTTTTCCAATCAAGTATTTCGAGATAATGTAAAAGTAATTGA
TATATGTTCGTACTGGTTTCCCAATTTCCGGGAAAAACTATGTACATGGGTGCAATTCCT
TGTGGTTATTTCCTTTTAGGTTATATTGCCAACCACATCATAGTACTATTTGCGGTCACT
TCAGAAGATATGTTTGCTCCTTTGATCATGATATAGACCAGGCCAACTGTACCGCTTCAG
GCTTCAAAGCATTAGGAATAAGCACCACTATTACACAACCATAGAGCTACTCTTACTGTC
ACGTAGGTAAAACACTTGCTACTACACACACTCGTAGTGACTCATCTGACTATATTGCCG
GTTGTTAAGAGGCACCAGTTAAGCACGCCATCAAGGGTACCGAATAATCTCTTCTGTATC
AAGTATTCTACCTTTATGTCTGACCCACGTATTATGTGGAGCAATTACGTATTTTTCTCA
TATCAGCTTTGTTTTTACTCAACTTTGATATCTTAGAGAAACAGATCTTGATGTTACAGC
AAGGTCAGGAAAATATTTTGACAAAAACATACTAGTTTCATCCTTAGTAGTTGATTCTAT
GAATGCTGTACTTGAAAATATTGTTCATAAAATCCATAAGTTTTACCAACGGTATAATAT
CCTGCTATTAAATCTGCAATTGCTTTTGCGAAAAGAAGGAAAACATGCAAAACAAAAGCA
AAAAAAAATTGGCACCCCAATTTCTTATAATATAATAATATAACGGAAGTACACCATGCT
TTCAATAATAAGATGTTTCCTGAAAAGGGCAACTATCTGACTAGTTCAGAGCCATGCAAA
AGTTAAGGATGAAAATGCCAAATAAGAAGATATTACGGAGTACATTCATTTCAAAAAGAA
GAATGTATACTGCTTAGATAAGAAGATCAAGTTTTTATATTTCCGACCAAATAAGCCATC
GAAAACTTTTGATGCACCAAACACCGTTCTTGAGAGCCAAGCACAGATGCAATTGTTCTG
CCCTTCTTCCAAATTATGAATTGTGCATCATATCGTAAGGCCAGCCACATAAAAAAAAGG
AGCAAAAAACTCAGTATACAGGCGAATATCCATCATACAGTCTAGCTGCCCTCACTACTT
CCAAAAAAATGGGCTAGTGTTGTACGGTTTATGCCATATATCTAGAGTTAGCATAACTAT
GCACTACCGCTTTTCGAACAAAAAGTTTGCGAAACCTAGTTCATTGAATATGACTTACCC
AAAATGGATACCAAGATCCTAATAATAAAGTCAATAACTTGAATTTTAGGTGCCATTATT
TCCAACAATCATTATAGGCTAACTCTACCAGCAGACAAGAATACCGTTCTTCTAGTTGAG
CACATGGTCAAAATAGTCAATAAAAAACGCCCAGAAATGGCTGTAAATTAGTGTTTGTAG
TACACAAAATAATTTCCTAATTCCTTCCAAATGGGGTTTTCAAAAAGCTGACTCACGTAA
TTGATCAATACTTCACTAAAGAAGAATCATATGAATAAAACTAAAATCAACACTAACTGA
GAGACTTAGCGGCCAAAGCTTAATCATCATTACATAGAGTATATGAAGGGAGTAAGTGAA
TATGCAAGGGTGGGAAACGGCAAAGCATTTTTATGCAAAAAGCGTATTTACAAATCCCGT
AAACTCATGATGTGAATTTTGTAACCAGCTTTAGCTGAGATTATTTCTTTTGCAAAAGAA
ATATTCAATAAATTAACAATTTTCAAATAAATTACCCATCCATGGTCGATAACTTGCAAG
AGAGATATCATCATTTGGCTTTTGTGATAAATTTACAAAACGTAATGTTGTATCGAGATA
TATTGAGTTACAAGTTTTCGTCTCTTTTTCCGAAGCGCCAGACTCCCGTATAAAAAATAA
GGTTTATAGCGGGCATTATGCGTAGATCAGGACTTAAATTTTTCATTGCAGAAGTCCAAT
TTCAGACTCAGTATGGTTTGTTGTAGTGCTGGTGTAAAAGATGGTGTTATTACTTAAGAC
TGATTTGGTTGCTCAGGTATTTCATTCAATAAAATTGTGAAAGAGAACCTGGAATATAGA
ATGGAAATATATATCCTGCTACTAACCCCAATGGAAGGTGACGATCACTTCTTGTGCGTT
CCAATCCCAGTTTTTGAATGTGCGAGTGGAAAAATTCTAGAGGAACAAATTGATATTTTC
AAATCAGAATTCATCAAATATATGTACTCTGTAAAAACCAAGGATGTGATGAAGTTGAGA
TATTGTCTTTATGGGAAATTGACTTCTTTGTTTAATATGAATAATGCAATTTTACTCCTC
AGCTCAAGTAGTGTAAAGATTCAGTAGCCGTCATCAAATAGACTAAAAATTAAAAAATAA
GATTCAATGTGGTATGATAATGATAGATGAGAAGAAATTGCAAGAAAACGAATAAATACC
TTGTCTCTTTGCACTGAATATCTTAAAGGACATACAGTCGCAATAACGTCTACTCATTGG
TGTGTGTCAAAAACAGTACGTTTATTATCTGGACAGCCAAAAAATAAGATCTATTCAAAC
ATGGAATATAGCGTATTTTTATTTAATCACGGTACAATGGAGATATTTGCATGCCTATAG
AAACAAGTAATAGTTATCATATTATTTTCTAGATTTTGTCACTGAACTTTTCCACTAATG
AATCCTATCAAAATTATATATCCAATATGGCTGCATTCCCAACTAAATATTAAAATGCCG
CTAAGTATAAAATGTCTCCGCATCGGTAAAAAGCATTACAAATGCGTATTATACTAGCGA
GAAAAAAGTATAAGTATCAATGCCAATCACCCTCTGACCATAAACTTTCTAAACATGAAT
AATAAAGGTGTTGAGAGTTATTATCCTAATTGATCAATTAATTTGAAGCAAAGTTATTAT
GTTAAAGAAAAAGGGATGTCACAATCCTAACTATAATTTTTGCACTATACTCTGTAGGCG
TACAAAATGGTTTGTACCGACTATATTCTCTTTATTTTTGACAATCCTTTACGATATATG
ATTAAGAATACCATGTTATTTTTATGAAAATCTGTGATTTTTTTGTTTTCATACACTTTT
TATTTTTGTCACGTAGTGCACTTTGATTAATACAAAAAAAAATGCTGCAAAAGCATCGAC
TACATAAATTCATTAGGACGCATTCCTCATTACCACCTGGGTCTAATTTTTATTTTGAAA
TTGATATTATTCTTTATATGATGAGGTAAAAAGCATTATATTCGTTGTAAACTCATATAC
TTATCCTCATTTTAGGCACCATCAGGGACTAAGGGCTAAAGTATCAGAGCCGCATTTCAA
CAGTGTACAGAGATTTTAGAAACATTATCACGCACTGCCTTTTGCTTTGTTTACCCGTAA
TGAGTATACAGTGGATTTTCTGGTGCTAAAGCATATTGCCCTTTCGGCAATACTTGATGC
CCTAAACATTTTCATCCTGGAACATACGAGTAAGAGCACATTTATGTGCCTATATTCCTC
GTTTTTTACTGGTGCTGAATTTCTTATTTTCCACAGATAACAATCATGTTAATAAATTAT
GCACTGTGCTAATTTTTCAATTAAGGTTCTATTACCCCTCTATCACCGACAGAAACACGT
AATGATGTGTTATTTCCATTATAATTCCGTAAGAATGGTGTTTATAGGTAGTCTAAAGAA
CGTGCATCAGAGAAGAATAACTGTCGCAAAAAATGACTATTCTTTACCTTTTCAAACTTA
ACTGAGATAGTTATCTCTATTATTACCAGTGGCACACACGCGAACTACATCACTCACCAC
TATCGTCTTAGGAACTCAAGATTTTATAGTAATGCAGCCGAAGACATTCAAGTCCTGAGA
GAAAATGTAGACATTTTAAGAAAAGTACCGGAAATAAAGCACATGTAAAGCATTGAGCTC
TGTACTCTATAAAAATTAGCTGCATTCAAACAACAATGTTTGAAATTTTTGCAAAAGTTA
TTGAAAAAGATTGCTGTTTTCAGCCTTGTTCAGATCATGTCTCAAAAATGAGAAACTGGA
ACTCTCATAATCAGTACCTCGTATTTTTTTTTCCTTATAGTTTCGTTATTAAAAATTTTT
TTGCTGCTAATTTAAGTACGCTTTTGGTCATAAATGCTACCCACCAGTTGAATTATTGAC
ATGATTAAAATACATTTCAGAACTTTACGGATTAAAAACTTTAAAGAACCTTTCAATCCA
TGTTGCTGGAGGGCCATGAATCCACGAATTACAGCAAAAGAAGACAGTAACTACTTAGGG
TTCAATAATTACTTGCATAAACACACACTAACAACCAAATCGTACTAAAATTTGCAATTA
ACAAAACTCCATCATATCACGCTGAATTATGTAGGGCTTCTTAATGCAATAGGTTGCCTG
AATTTTGCTTACTCGTGCTGCCGGGAACACTTAGCAGTTGGGAGGCCGTTTCTCCCATAT
ATTTCATAATTTTCTGTCCTTCTTAGAGTAGGATGCTGAAAATCAAAAGAAGACCGTCAA
TAGGACCAGATTTTGTGGGTCAATTTTGGGCCAGACACATGATACCCTAGGAAGTTTAAC
GGTATACAACTCAAGGACGAGGAGTATTCGGAAACTACCGGTTTTTAACAAGCTGCAAAT
TTCCAGTAGCTGTTTTGGTTGCGACTACGGATAAAAATTCATACTTTAGGAAGTGAAGCA
AGATAAAAAATCATGCTGCATCCTAATTCGTGAAGTTTGTTAGGAATATTATTGTAAACA
AGGAACCGTTTCAGTAAACTTGCTCTCTACTCTTCTAAGCTGTAATTTAAAAAAAGCGAT
AAAACAATGATTTTGATTATCTGCAACTTCTGGAAACTCGAGATACTACGCTAGACGAGA
TACCTATTAATTGTTTTCCTAAAAAATCAGGAACAGTTCCTGGCAGCTTTCGGCTCCTTC
TTGTTCTGGAAAGGATCTTCAAATCCGCTTCCACGTAGCAGTCCTCGCTACGACTTCTTC
TGAAGTATTTTGATTTTTGGCTGCATTTACCTTTTATTGCCGAAAATCTTATTTTCCAAG
AAAAAAGCTTATTTTGCATTAAGTTTAAAAAATTTCTTCTTTCCCGTAGATTGACTTGCA
GCGTCAAAATTCCGGAGGCCTCACGAGATTTTTTGACATCGGTTTTTGACATCTCTTTTT
CCTTCCTTTTTCTTTCTTTTCCTGCGCACGCCGATAAAGAAGTAGTACAACAGACAACGT
CAAAATGATCCTCTTGTGATGAAGCAAAAGAGGAAGAGTATACTCCTTTTCCGCTTGTAC
AAATATTTTTTTTGATAATAAAATTTGGCACTTCAGAGCTTATCGTATCTTCTCCCGGAG
TTCCTCAAGACTTATACTTCAGCCCGTTTAGGAATGCATAAAAGCAAATAGGATTCGTTA
CAACTGCTGCAGGACTCTTTAGGACTGCATCAAGGTAAGCCTCGCTGCACCTAAACGCAA
AATGTGGTTGTAACCTTTTTAATTTTTTTCTTGAACTTGTTGAGTCGTAATAAATCGTTT
CTGGGAAGTGGAAGGTAATAATGTAATGGAATCGGCGTTACTCGCATGTGCAGATATCAG
CGACAAAAAGTGTTGTAGGGACGTTTCGATACCAAAATTTCCTAAATACAGCGCAGGAAC
ATCACTACGCTAAACAAATCGTAGCGCATACATCTGATCGAAAAAAGACAGTTCCCAAAA
CAATGACATATGAAGAGACCAGCATCAAAATTTTCATCATTAACAGCATGGCTAAAAGTT
ATTGTTTAATATACCCATACCTGATTGACGAACCAAGAAATGCCTTATCACTATTTATTT
TTGGCACTCTTCACCTACCTGGCCACGTCCAATGTTGTTTCAGGAAGTACACAAGCATGC
CTGCCAGTGGGCCCGAGGAAAAATGGGATGAATGTCAACTTTTATAAATACTCATTACTG
GATTCAACAACGTATTCCTACCCGCAATATATGACTTCTGGATATGCCTCGAATTGGAAT
TAGGTTCCGTTGGCGGACAGACGGATTTCTCAATTGACTACGATCTTTCTTGTGTTATCT
CTTCAGGAACTTTTAAATGTGCTCAATCAGATGCTTATGGAAACTGGGGATGCAGAGGTC
ATAGTGAATGTTCAAAATAGCCAAGAAAGACCTATTGGAGTACTGATTTACTTGGTTTCT
TACTATCCCAAAAAACGCTACTCTAGAAATGACAGGTTACTTTTTACCACCACAAACAAG
TTCTTACACGTTCAGGTTTGCTAAGGTCGATGACTCTGCAATTCTATCAGTCGGTGGTAA
CGTTGCGTTCGAATGTTGTGCACAAGAACAACCTCCAATTACATCGACGGATTTTACAAT
CAATGGTATTAAGCCATGGCAAGGAAGTTTGCCTGATAACATCGGAGGGACTGTCTACAT
GTATGCAGGCTACTATTATCCGCTGAAGGTTGTTTACTCCAATGCCGTTTCCTGGGGCAC
GCTTCCAATTAGCGTGGAATTGCCTGATGGTACTACTGTTAGTGATGACTTTGAAGGGTA
CGTTTACTCTTTTGACGATGATTTAAGTCAGTCAAATTGTACTATCCCTGATCCTTCAAA
ACATACTACTAGCATCGTCACAACTACTACCGAACTGTGGACTGGTACTTTTACTTCTAC
ATCTACTGAAATGACCACCGTCACCGGTACTAATGGTCAACCAACTGACGAAACCGTTAT
TGTTGCCAAAGCTCCAACCACTGCCACCTCATCCAGTTTGTCATCATCTTCTTCAGAACA
AATCACCAGCTCTATCACGTCTTAGCATCCAATTATTACTCCATTCTATCGCAGCAATGG
AACTTCTGTAGTTTCTTCCTCAGTCATGTCTTCCTCGGTCATTTCTTCTTCTGCAACGAC
CTCCACTTCTATATTCTCTGAATCATCTAAATCATCCGTCATTCAAACCAGTAGTTCCAC
CTCTGGTTCTTCTGAGAGCGAAACAATCTTAGTGATTGCTGGCATGTCATTAGCGACAAG
ACGCTTATTACCGTAGTAGCCCCCCAAGGCAAACATCTCTTTATCAGTAATATCCAAAGC
TGTTCAACTTCTCGAATTGGCCCAGGAAAAGAGCATTGGGGCGGCAACTAACTCTGGCAT
ACTTACAGTTTCTGCTCTTGACAGCGCTAAAAAAGGGCTTGTTTTGTAATGCCCGGTTCG
CAATTCTACAAGTACCACGCACTAGCTGCTAAAAGTGTCTAACCTTGCGAACAAATCTGG
ACTTTCTTATGAGAATCCCATCGTCAAGAAACAAAATTATACAGACAGGCGTAAATGTAG
CTCGTAAGCGCCTGATCAAGTAAGCCAAATGCGCTAACTTGAGGAAATATAGCCATCTAA
ATCTCTGCAACATGCCAATTCGCACGTGACTTGAAACTATGGAAAGTGTCTAGAAGATTA
CCAAGAACCACGTTATTTGAGAGAGGATGGCAAGGTGACGACAATCACACCAAGACCACA
TTTTGGGTGCGCCTGGAAGCAAGACCTGAGAAACTGGGCCAAAATATTCAAACCAAGCAT
AAGATAGTTGGAGGTAGGAATACACTATCTAATCTGTGCTGATGAAATGCTGGCGAAAAC
GGGCGATGTAGTGGTACAGAAGGTGCCGGTTATCCGTTTGTCCGTTTTTCTTCATTTTTT
TTTTGTTTTTCCCTTTTGTCTTTTGCACCGCTTATATATGGGTATGAAACAAGTTCAAGA
ATTTATAATGGAACCCAAAGGTTCAGTCTTTGTAGTTCGAGCGACATTGCGCGTTTCCTT
AGAAAACGCTGGAAAGATATTCTTTAACGAGACGGAGTAATTCTCGTCAGGAATAGGATG
TTGATTGATTTTTGCTGTAGTTATATAGCAGGGACCCACGGAAGAGAGCGAGCGCCTTCT
TTCACAGGGACTTTTGTCAGCCACGTCTCCGGGGAAAACAATTGCCGTCCGCGTCGCAGT
GAGATTACGCAGCCGTGCGCTTCAGGGACAGAAAAGAAGCATTTCGCGGCTACGGAGAAA
CCGTGCACTAACTCTCTCGAGGGTAGCCGCAAAGATTTCTTGTCTCTTCCATTAGGACAT
AGCTATCTTTTTCTTTTCTGTTTTTGGCGTATGATCTGTTCTGAGCCAAAGTTATAGATC
ATTGCTTGAATAAGCACCTCACAGAGTAGGGATTGTATAGAAAGTAGCTGAGCGTCTGCC
CACGTAACAAACAATCTTGCCCCTTCCCCGCTCTTGTTTTCGCGTGCCTCTTCTACAATA
ATCTGGCCAGGCTGAATCGCGTTCTGCTGCTGCTGCTGCTATTGTTATTGTTGTTGTTGT
TGTTTTGGCCAATTGCTTATGTGTTGGTCTGCAAATTAGCACCTCGTTCCCTGTTGGCAA
ACGCGCGCGTACAAGCCTTACAGGGCTTGAGAATGTTCTTCGTAGAAATGCATGCACAAA
AATTCTGATCTAGCACACCATCGGTCTCTGTAGCTTCGGGCTCTATAGCTATGGGTTAGG
AGTCCGTGAGTAGTAACAAGAAGAAGTATATAAAAAGCAGGTAAATCGTACTTCAATATG
CTTCATTGTCACTGGATCGTCATATTCACTCTTGTTCTCATAATAGCAGTCCAAGTTTTC
ATCTTTGCAAGCTTTACTATTTCTTTCTTTTTATTGGTAAACTCTCGCCCATTACAAAAA
AAAAAGAGATGTTCAATCGTTTTAACAAATTCCAAGCTGCTGTCGCTTTGGCCCTACTCT
CTCGCGGCGCTCTCGGTGACTCTTACACCAATAGCACCTCCTCCGCAGACTTGAGTTCTA
TCACTTCCGTCTCGTCAGCTAGTGCAAGTGCCACCGCTTCCGACTCACTTTCTTCCAGTG
ACGGTACCGTTTATTTGCCATCCACAACAATTAGCGGTGATCTCACAGTTACTGGTAAAG
TAATTGCAACCGAGGCCGTGGAAGTCGCTGCCGGTGGTAAGTTGACTTTACTTGACGGTG
AAAAATACGTCTTCTCATCTGATCTAAAAGTTCACGGTGATTTGGTTGTCGAAAAGTCTG
AAGCAAGCTACGAAGGTACCGCGTTCGACGTTTCTGGTGAGACTTTTGAAGTTTCCGGTA
ACTTCAGTGCTGAAGAAACTGGCGCTGTCTCCGCATCTATCTATTCATTCACACCTAGCT
CGTTCAAGAGCAGCGGTGACATTTCTTTGAGTTTGTCAAAGGCCAAGAAGGGTGAAGTCA
CCTTTTCTCCATACTCTAACGCTGGTACCTTTTCTTTGTCAAATGCTATTCTCAACGGTG
GTTCTGTTTCCGGTTTGTAACGTAGAGACGACGATGAAGGCTCTGTAAATAACGGTGAAA
TCAACCTAGACAATGGAAGTACCTATGTTATCGTTGAACCAGTTTCTGGAAACGGTACAA
TCAACATCGTCTCTGGTAACCTATACTTGCACTACCCTGACACCTTTACTGGCCAAACTG
TTGTATTCAAGGGTGAAGGTGTTCTTGCCGTTGACCCAACCGAAACCAACGCCACTCCTA
TTCCTGTTGTTGGCTACACCGGTAAGAACCAAATTGCCATTACCGCCGACATCACTGCTC
TTTCTTACGACGGTACTACTGGTGTCTTAACTGCAACCCAAGGTAACAGACAATTCTCTT
TTGAAATTGGTACTGGATTCTCTAGTTCTGGCTTCAGTGTCTCCGAAGGAATCTTCGCAG
GCGCCTACTCATATTACCTAAACTATGACGGTGTCATCGCTACAAGCGCCGCATCCACAT
CCGCATCCACTACCTCTGGTGTTGTCTCTACTGCCACTGGTTCAGTCACTTTATCCTCTA
ACGCTTCTACCACCGTCTCTTCTACGATCTCTTCTAGCGCCCCAGACTCAATAATTCCTT
CATCTAGCGCCTCTATCTCTGGTGTCTCAAACTCCACTACAGCATCTGGTTCAATCGCTT
CTACTGCTTCCACCGCTTCCACTACTTCTACTGCATCCGCTGCATCCGCCACCAGCTTCA
CCTCAGGTTCCGCTTCTGTCTACACTACTACATTAACTTACTTGAATGCCACAAGTACAG
TCGTGGTTTCCTGTTCAGAAACAACCGACGCTAGCGGTAACATTTACACCATTACCACAA
CTGTCCCATGCTCATCTACCACTGCCACCATCACATCTTGTGACGAAAACGGATGCCATG
TTCCAGCACCAACTGCTACCGACGCAACTGCAACCGTTTCCTCCAAGTCATACACCACTG
TTACTGTTACTCACTGTGACAACAATGGCTGTAACACCAAGACTGTCACTTCTGAATGTT
CTAAAGAAACTGCAGCAACCACCATTTCTCCAAAATCATACACTACTGTTACCGTTACTC
ACTGTGACGACAACGGCTGTAACACCAAGACTGTCACTTCCGAGGCTTCCAAACAAACAT
CATTGGCCACTAGCACAGTCACCAAGTCTGCTGCTCCAACTTCTCATACTGCTGCTTCCA
GCACCTTCACTGGTATTGTCGTTCAATCCGAAGGTATGGCTGCTGGTTTGAGAACCAATG
CTTTAAGTACTTTGGCAGGTATTTTCATCCTTGCTTTTTTTTAAAATGAGTGCGTAACCG
TACTTTCCTAAAAATAACTAAGTAGAAAGTATTTTAATATATAAACGTCAGTGTAAACAT
TCAAGTGATTTTAACTTTACGCGGTTGAAGAATGCTGTGTTCGAACTATAAAGCGTCAGA
AAAGATGGTTTAGCGAAGGCACCATTATGAAGATAGACACATTCTTCTTTTTTTTTTTTT
TTTTTTTTTTTTTTTTTTTTTTTCATTTACTTTTATTTCGCGCGGTCGGTAAATTTTTCG
TGGGTTTCTTTGAATCTATTAGCCGACATAAGAATAATGCATAAATAATATTTTTAATGT
CTTCCTATGCCCAAAAGAAGAAGTCTTGAAGTTGCCGCACATGGAAATCACATGACCATG
GCTTGGCCCTTCGTTTTAAATGCAACATGCAATATGGAATGTGTCATGAATACTATCAGC
AGGAACAGAAAGCGTCGTTTTGTTTCTGCAAATGCTGTAGTTTTGGGCCGAAAATAGATG
TAGTAGAATATATAGTGAAACGTGATGTACAAAAGAAAAAGGTAGTTTAAAAAAAATTAG
ATAACTTGGATTTTTACCCTGAATATTGCATGTGATTCGTAAAGAACTGAGTTACCTCAA
ACGGACCTCCCTTTTCATTTCGTATTCCGCGAATCATGAAGTCATGCAATTACCTCTGAA
GAGCTGACTGTCCCAAAAGAAGCTATCGAATCTGTCCTTGATTTATTTAAGCCTTGCGTT
TCGAGAAAGTGAAAACCAATTGAATACAAAATAAAAAAAAAGAAGAAAGAAATAGCAGGT
CTAAGATATATAAGAAAGTTAATATCATTTTTGAACATTTTATTTTAGACGCCTTCAGCC
GCGCGACGCCCGGAGTAATCATATGCCCATGACTTTACCAAAAGGCAACAGGGAGGAACA
TGCATTAATGTGAAGCATCACTGCTGCAATTCTCGGTGTTGCTAATAATTCATGGATCGA
GAAAGAGACATAACATTTAGGCCAATTTTTTGAATAAATATGAACTCAGCTAAGACTCGA
CAATACAATTTTCTTATACTAAACGTAGATTTATAAAATAAACACAACTGTAAGGGCAAT
GCAACCGTAGATGCATATATCATTTATAGAAATTATATCCAACAGAAAGCTCAGACTTAT
ATCCGGTTTAAGAGAGAAATTCTTGCTCATATTACCCCAAGACCAGGTGGCGTGTTGAAG
TTTATAACATATAAGAACTACTACCTCATGAATTCTAGTGGATGAAAGAAGCAGCACGAA
CACCATTTCTACAGACAACGACACATGGAAAGGTTCACCATTCCCAAAGAAAACAACGAT
GGCCACAAGGGTGTGGTCCTCCATTCTCCTACTGTTGGAAGGAGATATTATCCGACCGAC
TGTTTTGTGATATGGCAAACTATTTTTTTAAATGAGCAAAATTACTTCTTTTGGCTGGAA
ATGTCATTAGAAAGTGCCCAAGTGACATTTAGCTAAACTCGGGTATTGTCTACAAGACCG
GTGCTGTGACCGTTTCCAATACGGAAAGAAACGGTACTGGGAGCAGGAGTTGCTTTTACA
GATATGAACAATGCCAATAGAGCCGCACATGTAATTACTGGTTCACACTCGTGGGGCCCA
CACGATTCCTGTGCAAAGTTTGACAAGAGGATGGAGTTTCACGTAAATGCTGCCAAAGGT
GATGCGGTTTTGTTTTTGGGCAGCCTCTACCATGTTGCAAGTGCGAACCATACTGTGGCC
ACATAGATTACAAAAAAAGTCCAGGATATCTTGCAAACCTAGCTTGTTTTGTAAACGACA
TTGAAAAAAGCGTATTAAGGTGAAACAATCAAGATTATCTATGCCGATGAAAAATGAAAG
GTATGATTTCTGCCACAAATATATAGTAGTTATTTTATACATCAAGATGAGAAAATAAAG
GGATTTTTTCGTTCTTTTATCATTTTCTCTTTCTCACTTCCGACTACTTCTTATATCTAC
TTTCATCGTTTCATTCATCGTGGGTGTCTAATAAAGTTTTAATGACAGAGATAACCTTGA
TAAGCTTTTTCTTATACGCTGTGTCACGTATTTATTAAATTACCACGTTTTCGCATAACA
TTCTGTAGTTCATGTGTACTAAAAAAAAAAAAAAAAAAGAAATAGGAAGGAAAGAGTAAA
AAGTTAATAGAAAACAGAACACATCCCTAAACGAAGCCGCACAATCTTGGCGTTCACACG
TGGGTTTAAAAAGGCAAATTACACAGAATTTCAGACCCTGTTTACCGGAGAGATTCCATA
TTCCGCACGTCACATTGCCAAATTGGTCATCTCACCAGATATGTTATACCCGTTTTGGAA
TGAGCATAAACAGCGTCGAATTGCCAAGTAAAACGTATATAAGCTCTTACATTTCGATAG
ATTCAAGCTCAGTTTCGCCTTGGTTGTAAAGTAGGAAGAAGAAGAAGAAGAAGAGGAACA
ACAACAGCAAAGAGAGCAAGAACATCATCAGAAATACCAATGTTGAAGTCAGCCGTTTAT
TCAATTTTAGCCGCTTCTTTGGTTAATGCAGGTACCATACCCCTCGGAAAGTTATCTGAC
ATTGACAAAATCGGAACTCAAACGGAAATTTTCCCATTTTTGGGTGGTTCTGGGCCATAC
TACTCTTTCCCTGGTGATTATGGTATTTCTCGTGATTTGCCGGAAAGTTGTGAAATGAAG
CAAGTGCAAATGGTTGGTAGACACGGTGAAAGATACCCCACTGTCAGCAAAGCCAAAAGT
ATCATGACAACATGGTACAAATTGAGTAACTATACCGGTCAATTCAGCGGAGCATTGTCT
TTCTTGAACGATGACTACGAATTTTTCATTCGTGACACCAAAAACCTAGAAATGGAAACC
ACACTTGCCAATTCGGTCAATGTTTTGAACCCATATACCGGTGAGATGAATGCTAAGAGA
CACGCTCGTGATTTCTTGGCGCAATATGGCTACATGGTCGAAAACCAAACCAGTTTTGCC
GTTTTTACGTCTAACTCGAACAGATGTCATGATACTGCCCAGTATTTCATTGACGGTTTG
GGTGATAAATTCAACATATCCTTGCAAACCATCAGTGAAGCCGAGTCTGCTGGTGCCAAT
ACTCTGAGTGCCCACCATTCGTGTCCTGCTTGGGACGATGATGTCAACGATGACATTTTG
AAAAAATATGATACCAAATATTTGAGTGGTATTGCCAAGAGATTAAACAAGGAAAACAAG
GGTTTGAATCTGACTTCAAGTGATGCAAACACTTTTTTTGCATGGTGTGCATATGAAATA
AACGCTAGAGGTTACAGTGACATCTGTAACATCTTCACCAAAGATGAATTGGTCCGTTTC
TCCTACGGCCAAGACTTGGAAACTTATTATCAAACGGGACCAGGCTATGACGTCGTCAGA
TCCGTCGGTGCCAACTTGTTCAACGCTTCAGTGAAACTACTAAAGGAAAGTGAGGTCCAG
GACCAAAAGGTTTGGTTGAGTTTCACCCACGATACCGATATTCTGAACTATTTGACCACT
ATCGGCATAATCGATGACAAAAATAACTTGACCGCCGAACATGTTCCATTCATGGAAAAC
ACTTTCCACAGATCCTGGTACGTTCCACAAGGTGCTCGTGTTTACACTGAAAAGTTCCAG
TGTTCCAATGACACCTATGTTAGATACGTCATCAACGATGCTGTCGTTCCAATTGAAACC
TGTTCTACTGGTCCAGGGTTCTCCTGTGAAATAAATGACTTCTACGACTATGCTGAAAAG
AGAGTAGCCGGTACTGACTTCCTAAAGGTCTGTAACGTCAGCAGCGTCAGTAACTCTACT
GAATTGACCTTTTTCTGGGACTGGAATACCAAGCACTACAACGACACTTTATTAAAACAG
TAAATAGATAATATGATTATGTAATTTTAGAAACTAATTATGAATACCGATTTATTTTTT
TTTTTTTTTTTCACTTTTGCTGGCAAGAAATACGAAATTGCAATGACGATCACAGTCCAA
AGAGGTAAGCACAAAGGCGCAGTATGTGATTACTCTATCATTCTTTAGCAAAACCAGGAT
AGGAGTATATGTATAAGAAATATGCAACGCCATCATTTAATGCAATAGACACGACATGCC
CTTTACATGAGGTGGTACAATGTTTTAATATTGTGTCAGGGCAAGTACATGATAATATCG
TTTAAAGATGATGCTAGAGTAAAAGTATGAAGTGAAAGAAAAGGGCAATTGATTGACTAA
GCGGATGTTGTAGGATGATATAGTGGCTCATGATCTGTAAATGATCGGTTGACCGCAGTA
TTATATAATAACATCCGTATAAGTACATATACTACCATGTCTGTTCTCTACATTGCTTTT
TATTCAAGATTATTGGTTTTCCTAACCGCCGCGCCGCGCAGGTACCCCGCGCATCTCTTC
TTCTCGAAGAAAGCGGAAAAAACAAAAAAAAAAGTATAAATAGTGGAGTCTTTTCCCATT
TAACATTTAGAAAAAAATTCGAATGGAAATTTCTTGCCGAACATTTAACCGGAGACCCTT
GGCGGCTTTTTCTCAGTTTCGTGGGCTAGTACATTTTACCTAGTATGCTGGGAACTTTTT
TTCCGTATTCTATTCTATTCCTTGCCTTACTTTTCTTATCATTTTTTATATAACCAATTT
CAAAAATACTTTTTAACTGTCATAGACGCATTTTGTTTATTACAAATTAAAAGAATCAAA
TATAATATGTGCAATTAATAACTCCACAAGTAGCGAAAGCAATGGCCGCCATTAGAGACT
ACAAGACCGCACTAGATCTTACCAAGAGCCTACCAAGACCGGATGGTTTGTCAGTGCAGG
AACTGATGGACTCCAAGATCAGAGGTGGGTTGGCTTATAACGATTTTTTAATCTTACCAG
GTTTAGTCGATTTTGCGTCCTCTGAAGTTAGCCTACAGACCAAGCTAACCAGGAATATTA
CTTTAAACATTCCATTAGTATCCTCTCCAATGGACACTGTGACGGAATCTGAAATGGCCA
CTTTTATGGCTCTGTTGGATGGTATCGGTTTCATTCACCATAACTGTACTCCAGAGGACC
AAGCTGACATGGTCAGAAGAGTCAAGAACTATGAAAATGGGTTTATTAACAACCCTATAG
TGATTTCTCCAACTACGACCGTTGGTGAAGCTAAGAGCATGAAGGAAAAGTATGGATTTG
CAGGCTTCCCTGTCACGGCAGATGGAAAGAGAAATGCAAAGTTGGTGGGTGCCATCACCT
CTCGTGATATACAATTCGTTGAGGACAACTCTTTACTCGTTCAGGATGTCATGACCAAAA
ACCCTGTTACCGGCGCACAAGGTATCACATTATCAGAAGGTAACGAAATTCTAAAGAAAA
TCAAAAAGGGTAGGCTACTGGTTGTTGATGAAAAGGGTAACTTAGTTTCTATGCTTTCCC
GAACTGATTTAATGAAAAATCAGAAGTACCCATTAGCGTCCAAATCTGCCAACACCAAGC
AACTGTTATGGGGTGCTTCTATTGGGACTATGGACGCTGATAAAGAAAGACTAAGATTAT
TGGTAAAAGCTGGCTTGGATGTCGTCATATTGGATTCCTCTCAAGGTAACTCTATTTTCC
AATTGAACATGATCAAATGGATTAAAGAAACTTTCCCAGATTTGGAAATCATTGCTGGTA
ACGTTGTCACCAAGGAACAAGCTGCCAATTTGATTGCTGCCGGTGCGGACGGTTTGAGAA
TTGGTATGGGAACTGGCTCTATTTGTATTACCCAAAAAGTTATGGCTTGTGGTAGGCCAC
AAGGTACAGCCGTCTACAACGTGTGTGAATTTGCTAACCAATTCGGTGTTCCATGTATGG
CTGATGGTGGTGTTCAAAAACATTGGTCATATTATTACCAAAGCTTTGGCTCTTGGTTCT
TCTACTGTTATGATGGGTGGTATGTTGGCCGGTACTACCGAATCACCAGGTGAATATCTC
TATCAAGATGGTAAAAGATTGAAGGCGTATCGTGGTATGGGCTCCATTGACGCCATGCAA
AAGACTGGTACCAAAGGTAATGCATCTACCTCCCGTTACTTTTCCGAATCAGACAGTGTT
TTGGTCGCACAAGGTGTCTCTGGCGCTGTCGTTGACAAAGGATCCATTAAGAAATTTATT
CCGTACTTGTACAATGGATTACAACATTCTTGTCAAGACATCGGCTGTAGGTCGTTAACT
TTACTAAAGGAAAATGTCCAAAGCGGTAAAGTTAGATTTGAATTCAGAACCGCTTCTGCT
CAACTAGAAGGTGGTGTTAATAACTTACATTCCTACGAAAAACGTTTACATAACTGAATG
TTAAATGGGATCATTAATACAATAGTACTGTACGTATGGCACCTGTACATACTGCGTTAT
AAATGTACTAATGGAATGATATATTAATATATAGTGTGTTTATACCTTATTATTGATGAT
TAGTATATATTTTTATATTTAGGTGATTTTAGTGGAGATTATTTGGTGGTAATTACACTA
GTATACATAAAATGGGTAGTGGATATTTGTATAGAAAGGGCATTACGCATGGAGTTAAGA
GTATTTACATGATAATTGGGGTTCCGTGATTCATTATAGATAATAAAACGTGGATAATAT
TGGGTGTTATAGGTAAATGGGACAGGGTATAGACCGCTGAGGCAAGTGCCGTGTATGGTG
ATGTGGTATGGTATCGAGTACCGATGGAGTGAGAGATGGCCTTGGTGTAGAGTATTATGG
CGGGTAAGTTAGATGATGTATTGTTTACGTTATATTTGTTTAAATTGGATTTGTTTACAT
TAGATTTGTTTACATTTCAATATATCAATGGAGGGTATGTAGCATTATGGTAAGTAGCAC
GTGGTAGATGGGGATTGTAGGTGGATGGTAGGATGAGTGGTAGTGAGAGTTGGATAAGAT
ATATTGGGCAGGGGATAGATGGTTGTTGGGGTGTGGTGATGGATAGTGAGTGGATAGTGA
GTGGATGGATGGTGGAGTGGGGGAATGAGACAGGGCATGGGGTGGTGAGGTAAGTGCCGT
GGATTGTGATGATGGAGAGGGAGGGTAGTTGACATGGAGTTAGAATTGGGTCAGTGTTAG
TGTTAGTGTTAGTATTAGGGTGTGGTGTGTGGGTGTGGTGTGGGTGTGGGTGTGGGTGTG
GGTGTGGGTGTGGGTGTGGTGTGGTGTGTGGGTGTGGTGTGGGTGTGGTGTGTGTGGG
>II dna:chromosome chromosome:R64-1-1:II:1:813184:1 REF
AAATAGCCCTCATGTACGTCTCCTCCAAGCCCTGTTGTCTCTTACCCGGATGTTCAACCA
AAAGCTACTTACTACCTTTATTTTATGTTTACTTTTTATAGGTTGTCTTTTTATCCCACT
TCTTCGCACTTGTCTCTCGCTACTGCCGTGCAACAAACACTAAATCAAAACAATGAAATA
CTACTACATCAAAACGCATTTTCCCTAGAAAAAAAATTTTCTTACAATATACTATACTAC
ACAATACATAATCACTGACTTTCGTAACAACAATTTCCTTCACTCTCCAACTTCTCTGCT
CGAATCTCTACATAGTAATATTATATCAAATCTACCGTCTGGAACATCATCGCTATCCAG
CTCTTTGTGAACCGCTACCATCAGCATGTACAGTGGTACCCTCGTGTTATCTGCAGCGAG
AACTTCAACGTTTGCCAAATCAAGCCAATGTGGTAACAACCACATCTCCGAAATCTGCTC
CAAAAGATATTCCAGTTTCTGCCGAAATGTTTTATTGTAGAACAGCCCTATCAGCATCGA
CAGGAATGCCGTCCAATGCGGCACTTTAGATGGGGTAACTCCCAGCGCAAGCTGATCTCG
CAAGTGCATTCCTAGACTTAATTCATATCTGCTCCTCAACTGTCGATGATGCCTGCTAAA
CTGCAGCTTGACGTACTGCGGACCCTGCAGTCCAGCGCTCGTCATGGAACGCAAACGCTG
AAAAACTCCAACTTTCTCGAGCGCTTCCACAAAGACCGTATCGTCTTTTGCCTCCCATTC
TTCCCGGCACTTTTTTTCGTCCCAGTTCAAAAAGTACTGCAGCACCTCTGTCTTCGATTC
ACGCAAGTTGCTCCATACTTTATAATACAACTCTTTGATCTGCCTTCCAGACATGCGGAA
AACTTGGCTCCCTTGCTTGCCTCTTGTCGAATCCAATACACTAATTGTTTCTCTTCTTCT
AGTAATGGCCAGGTACCAAGCATAATTTCTCTGTATCTGAGAGTAGATCTCTCTCCTTTT
TACGCTAAAATATTTCAAATATCCTACAGGGTCCCCATGATATGGCTCGATGTCTTCCAA
GTATTCTTTGTATTCCTCATCATTTCGCAGCATTCTCTCCACAGCTAGTGCTTCCCAAGC
TATCCTCCGATACGATACTTTCTGGCCAGCCCAACAGACACAGAGCCCGAACATCTTTTG
ACAGCCCTTGCATAATCCGTATTGTGTGAATACTCCCTCTGGGCAGAAGTATATGTCAAT
ACCATAGAGGAAAAGATGTTTAATTTCGTCAGACCGAAATCCAAGAAACTGTAAGACATT
CATATTCTCGGAAGTATTGGGAAATTGTGCTTTCAGTTTCTTTCTCTCTAGGAAAACCAT
TTGACTCCCTTTCCGCTTATACGACTCTTTGTTAATGTCGGTGACTGGATGGAATCTATT
ATCCTCAGCATTGCCATCTTTATTGGCGTCCTCCTTGGCACTAGCGTTGGTACTTTCAGT
GGTAGTGGCATTAGTGCTGGAGTTGGTGCTAGCAGTGGTAGTGGCATTAGTGCTGGAGTT
GGTGCTAGCAGTGGTAGTAGCACTAGTGTTGGAGTCGGTACTTTCGGTGGTAGTAGCACT
AGTGTTGGAGTTGGTACTTTCAGTGGTAGTCGCACTAGTCCTGACGTTGATGCTAGCAGT
GGTAGTAGCATTAGTGTTGGAGTCGGTACTTTCGGTGGTAGTAGCACTAGTGTTGGAGTT
GGTACTTTCAGTGGTAGTAGCATTAGTGCTAGAGTTGATACTTTCAGTGGTAGTAGCACT
AGTCCTGACGTTGATGCTGGCAGTGGTAGTAGCACTAGTCCTGACGTTGGTGCTGGCAGT
GGTAGTAGCACTAGTCCTGACGTTGGTGCTGGCAGTGGTAGTAGCATTAGTGCTGGAGTT
GGTAGTCGCATTGGTAGTAGCACTAGTCCTGACGTTGGTGCTGGCAGTGGTAGTAGCATT
AGTGCTGGAGTTGGTAGTCGCATTGGTACTGGCATTAGTGTTGGAGTTGGTACTTTCAGT
GGTAGTCGCACTAGTCCTGACGTTGATGCTGGCAGTGGTAGTAGCATTAGTGCTGGAGTT
GGTACTTTCAGTGGTAGTCGCACTAGTCCTGACGTTGATGCTGGCAGTGGTAGTAGCATT
AGTGCTGGAGTTGGTACTTTCAGTGGTAGTCGCACTAGTCCTGACGTTGATGCTGGCAGT
GGTAGTAGCATTAGTGCTGGAGTTGGTACTTTCAGTGGTAGTAGCATTAGTGTTGGAGTT
GGTACTTTCAGTGGTAGTCGCACTAGTCCTGACGTTGATGCTGGCAGTGGTAGTCGCACT
AGTCCTGACGTTGATGCTGGCAGTGGTAGTAGCATTAGTGCTGGAGTTGGTAGTCGCATT
GGTACTGGCATTAGCACTACCATGAATGCACGTGTCGCTGTCCTCATCACTGCTGCAATA
CTTTCTGCACCTGTCACTGCTATTGCTCTCCTGGAAGCTAGACGGTAACGCAACGATCGA
CATGGAAGCTGTCGCCTGATTTTCAGCCAATCTGTCCATTCTTTCTATCAGTTCCACTGT
GTCAGCAGACAGGTCTGTCCTGGAGCCACAGCATCCAACATGCTGGCCCTTTTTTTCCTT
TCTTTGATTCAAGTCCATAGAACTCGCGTACCTGTTCGGTTATACAGCCTTCCTTAATCG
GTGGTAATTCACCCTTACGATTCCTTGCCGCCCAACTGTTTTTTCTAGATAATAGATAAC
AGAGGCCCCCATCTCTTAGTCTCCCTACGCCTTGAATGAGCTCAATAATATTAAGTCTAT
TATCAAGCATGATCACCATCATCAATTGCTTAATGTCAATTCCTTCAGTCACTAATTTCG
TTCCGATGAGAACTTGCATGCTACCGTCAGTGACAAACTCCTTTGTGCGAGACACCTTTT
CTGCAGCACCCAAGCTTCCCGTGTATCCATACCACCCTAAAATACTTTCTCCAAGAGCAG
GCCAATTCTTCCACTTCGTTGGTTGTGCTTGCAACTACAATGGCCTTCGACTCTGGTTCA
ATTTCAAAGAGGGCTAAAAGAAGCTTCAGTGCTTCTTCGGGCTGTGATTCCACTTTCTTC
CAAATTTTATGAACATGCCCTAAAGGCACCTCGGATTTCTCCTTGATTAGATTAAACATC
CGTGTTGGATAGCTGGATAGACCTCTGCTGAGATCTTCCGACCGTTTGAGCTCGTTGATG
TCCATCGACTTCTTGGCCAGTCCCGTAAGCCCAATACGCTGCAACGCAGCATCAGCAACA
GCCTCAGGGGCTGTGCCGCTCAAAAAGATTGCTTTCTCAAAAGCGTCAAAATCAAGGTTA
GTTATGCCCCCAAATTGCGACTGCCGGTAGACCTCCGTTTCAAAGTTGTGAAACTCATCT
ACAATGAGGTAACCCAATTTTACGTTGTTGGTCCTAAAGGTGCACTCAACAATATTCTCC
CACGCAGCTATCCTGTCTGTGAAATTAGTGCTAGCAAGATCATCGTAGATCCCCACGTAT
AAATCAGTAACGCCATCGCAACCTTCTTCAATAAAGTTTCTTACAGGGGCCACATTCAAG
CAACCGCGTCGGCCCAACCTGATCATGCAATTAGCAAGCAACACTGTGTACGGTACAAAC
AGAAACGACACATATTTCACGTCGCCCTTAGATGCCAGTGCTATCAAGGGGAGATGAAAT
AACTCCGTCTTACCATAGCCCGGTGGGGCCTGTACTGCCACAGAGGGTGTGTCTGCCATG
TATATTTCATGACATAAGCGCAACTGATGCAAGTCCCTGAATTCAAAGGAGCTGCCAAAG
AGTTTCCGGCCTGCGACGAGGATATCGTTTGTACTCTTGGGCTCTCGGGGCCTTTTTCGC
GTTACTCTTGAAATTTTTTGATCATGATCTGAACTCGCCGCCTCACCTGCCACTACGTCT
TCCGCATTCCGAGTACTAGAGAATGAACAATGGTAGTCGCTTTCAAGGCCTAACCATTGA
ATCCAGCGCTCGGAAGTGAGTCCGTCAAGCGTCTTTAGTCGAGGCTCCGATGAACCGTTC
TTGTTGTATCGTCGACGTATACGTTGCGCTGTAGCTCTGGATAACGGTAAGCGTATCACC
GTAAGCTCGTCAATTATTTTTGAGAGCCGCGGTCATTTTGTTAGTATCTCTTCTCAACTT
GGGCAGCACACATGCAAAACATCACCCAATCGGTCCTTTTTGTTCATCATATCGTTACAT
ATCTGTGAAAAGTACTTTATCTCAGTGGGTTTACGTGGGCATAGATCACGCTTCAGCCGC
TCTGTGTCGACTTTCTTTTCGCCAGGTAAACTTGCTTGGTATGCAGAAAAAATCGATAGC
TCATCTACGTGTAGTAACAAGAACATGTAGGGTGCCAAATTGTATCCATATTTCCTTATG
GTGCTTTTCTGAAGACTCCTTACAATAGGTGTGCCAGAAACAAAGTCAGTGAAAGTACGC
ATCGTAGAGCTGTCGTTCGGCCTGGCACTCGCTATTTCGTAACAACGTTCCAGGACACGG
AAACTCAACTCATTATAGTATCCTCTGTTGAGGTAAAAAAGAGAAAGGGTATCGTAATCC
TTTCTATTGAATTTCAAAGTATGCACTTGAAACAACGTGTAGACCATCAAGTTGATTTTC
TTGGGAATAAGATACTTTGAAGGGATTGGTCCGCCCTGGAAATCTGGTTCGTCTTCAACA
AACGTCAGGAACTTTTGTACATTTTTCCCGACCATGACGGAAACGACAATTTTTTCAAAA
GACCTTTTCCTATCCATTGCACCAGTTCTGAATTTTACCACTTTGATTAGACCAGACTTT
TCGTCTTCGTAGAATGACCGCACTTCCGTGGGGATCGATTCAAATAAAGTTATTGAGGGA
CAATGTACCAAGTCGTTTTTGTTATTTAGAGCCGACTCAAACTCGTCAAAGTTTGCTTTT
TCAAACTTACGCCTATCGGAAACTTTCATTTTATTTTTGTAAGTTTCGAAATTAACAATA
GTATGTTGATTGCTATGCTTTTTGACAAGAAATCCATCAATATAAACAAAAGATTGTCCA
GTTTCCGTCTTATCATCATCTAAGAATGTAATAATTAAGCTACTCTATTGAGAAGAAGCA
GAATCTGCGCTATGCAGGTGCAAATCTCCAGCAGCAGCAAAGAAAATTCAGTTAATAAGA
AATCTCACTAAGATAAGCGACTGTCTGTCCCCTTCAAGCACAACATAGAAAACAGAAGGA
TGTCTCATTCATCGCTTGATTTCCGGCCTGCAAAAATAAAGTAGTCGGTACGTACTTTCG
TTTTCAATTTCCATGGTGCACAGTATCTTAACTATCTGCTTAGTCGAGGAGAACCAGGAT
TCTGTTCGTTGCTCAGCCGCTTCGTGGATATTCTCTTGGATACTTTAAACATGGACCTAC
GTTCCGCTCTCGAAAAGACCAATATAATAAAAAGTTATAAATTACATTTCCTTATTAGGT
ATACGACCTCGCGCTTCGAAGTAGAGGAGCCCTTTTTGGCGTACCTACATATGGCGCGTC
AGACAGACAAACTTCCCCCAAAAATGTATTACCCCGCCGAATAAGAAAACAGACCCATTC
ACCCACGACGTATCAAGTTACTTCCTTGGTGCAATGTCCCACTATAAAAAAATTCCTTGA
CGCTAGATCGTTGGACTAAAATCTGCGTCACAATCGCCTAAACAGGAAATATTGCCTATT
TTCGTACAAGGTTACTTCCTAGATGCTATATGTCCCTACGGCCTTGTCTAACACCATCCA
GCATGCAATACAGTGACATATATATATACCCTAACACTACCCTAACCCTACCCTATTTCA
ACCCTTCCAACCTGTCTCTCAACTTACCCTCACATTACCCTACCTCTCCACTTGTTACCC
TGTCCCATTCAACCATACCACTCCCAACCACCATCCATCCCTCTACTTACTACCACCAAT
CAACCGTCCACCATAACCGTTACCCTCCAATTAGCCATATTCAACTTCACTACCACTTAC
CCTGCCATTACTCTACCATCCACCATCTGCTACTCACCATACTGTTGTTCTACCCTCCAT
ATTGAAACGTTAACAAATGATCGTAAATAATACACATATACTTACCCTACCACTTTATAC
CACCACACATCACATGCCATACTCACCTTCACTTGTATACTGATATGCCATACGCACACG
GATGCTACAGTATATACCACTCTCAAACTTACCCTACTCTCACATTCTACTCCACTCCAT
GACCCATCTCTCACTAAATCAGTACTAAATGCACCCACATCATTATGCACGGCACTTGCC
TCAGCGGTCTATACCCTGAGCCATTTACCCATAACTCCCACGATTATCCACATTTTAATA
TCTATATCTCATTCGGCGGGCCCAAATATTGTATAACTGCTCTTAATACATACGTTATAC
CACTTTTGCACCATATACTAACCACTCAAATTATATACACTTATGCCAATATAACCAAAA
AATTACCACTAAAATCACCTAAACATAAAAATTATTTATCTTTCAACTTTACGAAATAAA
CACACTCAATTGCGTATCTATACCACCATGACGTCATTAACGTAAAAGTTCCTTAATATT
ACCATTTGCTTGAACGGATACCATTTCAGAATATTTCTAACTTTCACAGACCATACATTA
GAATAATATGCCACCTCACTGTCGTAACACTCTATATTCACCGAGAAACAATACGGTAGT
GGCTCAAACTCATGCCGGTGCTATGATACAATTGTATCCTATTTCCATTCTCATATGCTA
TCCGCAATATCCTAAAAGCATAACTGATGCATCTTTAATCTTGTATGTGACACTACTCAT
ACGAAGAGACTATATCTAAAGAAGACGATACAGTGATATGTACGTTGTTTTTGTAGAATT
ATAATGAAACGTCAAATAACCCTACTATATTATAACTTATCAGCGCCGTATACTAAAACG
GACGTTACGATATTGTCTCACTTCATCTTACCACCCTCTATCTTATTGTTGATAAAACAC
TAACCCCTCAGCTTTATTTCTAGTTACAGTTACAACAAACTATCCCAAACCATAAATCTT
AATATTTTAGGTGTCAAAAAATGAGGATCTCCAAATGAGAGTTTGGTACCATGACTTGTA
ACTCCACTACCCTGATCTGCAATCTTGTTCTTAGAAGTGACGCATACTCTATATGGCCCG
ACGCGACGCGCCAAAAAATGAAAAAAGAAGCAGCGACTCATTTTTATGGAAGGACAAAGT
GCTGCGAAGTCATACGCTTCCAATTTCATTATTGTTTATTGGACATACTCTGTTAGCTTT
ATTACCGTCCACGCTTTTTCTACAATAGTGTAAAAGTTTCTTTCTTATGTTCATCGTATT
CATAAAATGCTTCACGAACACCGTCATTGATCAAATAGGTTTATAATATTAATATACATT
TATATAATCGGCGGTATTTATATCATCAAAAAAAGTAGTTTTTTATTTTATTTTTTCATT
ACTTTTCACTGTCTATGGATTTTCATTCGTAAAGGCATCACTCCCTAGTTTGCGATAGTG
TAGATACCGTCCTTGGATAGAGCACTGGAGATGGCTGGCTTTAATCTGCTGGAGTACCAT
GGAACACCGGTGATCATTCTGGTCACTTGGTCTGGGGCAATACCAGTCAACATGGTGGTG
AAGTCACCGTAGTTGAAAACGGCTTCAGCAACTTCGACTGGGTAGGTTTCAGTTGGGTGG
GCGGCTTGGAACATGTAGTATTGGGCCAAGTGAGCTCTGATATCAGAGACGTAGACACCC
AATTCCACCAAGTTGACTCTTTCGTCAGATTGAGCTAGAGTGGTGGTTGCAGAAAGCAGT
AGCAGCGATGGCAGCGACACCAGCAGCGATTGAAGTTAATTTGACCATTGTATTTGTTTT
GTTTGTTAGTGCTGATGTAATCTTAACAAGAAATAGTGAAATGAAAGCGCATACCTCAAA
GGCATATAGTTGAAGCAGCTCTATTTATACCCGTTCCTCCATCTGTCATCACTACTTAAA
CGATTCGTTAACAGACGCTCATTTAGCACCTCACATATTCTCCATATCTCATCTTTCACA
CAATCTCATTATCTCTATGGAGATGCTCTTGTTTCTGAACGAATCATACATCTTTCATAG
GTTTCGTATGTGGAGTATTGTTTTATGGCACTCATGTGTATTCGTATGCGCAGAATGTGG
GAATGCCTATTATAGGGGTGCCGGGGGGTGCCTTGAAAAACCCTTTTGCGCGCCTGTTAA
GTTTCCGTTTTCAGTCAAAAAGAATATCCGAATTTTAGATTTGGACCCTCGTTCAGAAGC
TTACTGTCTAAGCCATCATTTGGTGTGTCCTAAACGGTTTCCATGCAAAGCAACATCTTT
GTTACTCATTCCTGAAGGTTGAATAAAAAATAGCAACCATGTGCAGGGAGTCGTATATTG
TTAGATTCTAGAGACTTGTACGCATCATCAAAGCTGTAAATAGAATAAACATACGCAAGG
CGTCAAAAGTGCATAGTTAAGAAAATTCCTGACATGTGAAAATATGTGTTTATGAAATGT
GTCAAGGCCCGTCTATAGCGTAGTTAACCCCTCTGCAGGAGTAAGTGACTTTTTTTACGC
TCAAAAGGCAACGAGGGCACATACTTAAAAGTCATTTTCAAACACATCTGCAGTTTGCAA
CGACAGATAACAATATTATGATAGGATGGTATGATGTTATTAGCTGCCACATATTTTTTA
ACATAGCATTAGTCACGTCTCTTCAATTGTTGGGATGAAACTCTAAAATATCATTCCTTT
AGTAGTATTCCAGTTACCAGTATATTATCACATGCCGAAAAAGAAGATGACATAAAGATC
GACAAACAGTCTTCAAATATAATGGAAGCTGGAATGCAAGGATTGATAATGTAACAGGAT
ACTGAATGACAAAGTATAAATGAAAAAAAAAAAAAAAAAAAAGTAGTAATACTATTATGT
GGAAATACCGATTCCATTTTGAGGATTCCAATTGTTGGAATAAAAATCAACTATCATCTA
CTAACTAGTATTTACGTTACTAGTATATTATCATATACGGTGTTAGAAGATGACGCAAAT
GATGAGAAATAGTCATCTAAATTAGTGGAAGCTGAAACGCAAGGATTGATAATGTAATAG
GATCAATGAATATTAACATATAAAACGATGATAATAATATTTATAGAATTGTGTAGAATT
GCAGATTCCCTTTTATGGATTCCTAAATCCTGGAGGAGAACTTCTAGTATATCTACATAC
CTAATATTATAGCCTTAATCACAATGGAATCCCAACAATTACATCAAAATCCACATTCTC
TACACCAATACCATCGACGAGAGCTTCTAGTAAATTGTATACATAACAGTATAACCCTTA
CCAACAATGGAATCTCAAAGATTATTAAATTATTCACAGACTCTGAGGATTCGGGTAAAA
TAGGGTATTTAACTGGTTACCGGAAAGGTTTAGAAAATTCGTGGAGGGTTGGCCGAGTGG
TCTAAGGCGGCAGACTTAAGATCTGTTGGACGGTTGTCCGCGCGAGTTCGAACCTCGCAT
CCTTCAGTATTTTTTTTGATGATTTAACGTACTATTAACTAGAATAATAGGGAAATGCAA
TTGCAGTTTGAGAAGAAGAATTATTAATAAGCCAAAAAGCGGCTCACTAAGTAAGTTTTT
CTTCATGGCGTCCTTTGCATCCAGCAATAATGGTTTTAGCAAAAAAATCTCTTTCACTAC
ACAAGTTGGAGCATATTTTTTAACAAATACAGATAAACGAAAGGCGATAATAAGTATACT
TCCTATGTACAAGAATCTTTAAGTGATATAATCTTTCAGCGGACTAGAAGAATAGGGCGT
TCAACTGTTGTCCTTGCAGAATTGCGTAAACTCCTTCAAGTAGTCATTATTTTGCTCGCA
GTTTTGCCTTAAAATGCCCTCTGTTGTAGAAGTTAAAATTTGTTCTATTTTTCTATTATT
TGCCACCCACTCTGTCACCTTCGTCCAATCCTTATATTGAGCTTCCTGTTTCTCCGCTCT
TTCTCTTGCAGCGTAAGGATCAATTCTTGCGTCTATAAGTGGTTCCGCAGTAGTCTTTTT
ATTATTACCGCACTGCTGATCGGTCTCGTTCTTCATCTCTGCTGCCTCTTTTTCGCAAAA
TGAAATTATATTATTCCGTATTTGCCAGTTCGGATATAGTTCTTGCTTCAAAAATTCCTT
ACACTTATTTTTTCCATTAATAGAGCCTTTCCTATAGTTGTTTAATTTTTGTCTTATTAT
ATCATCACTTCCATGCCTTAGAAACCTCAAAAATGAATCTATCAAGCTTGGATCAACACA
TCTTTCTCGCGTAACTGTGATTGTAGTAAGTGACGGTTCATCATTCGGAAAAGTAAGATT
TGTTTCAAGTAAGCTTTGGGGTGCCGTAAACGTACGCCTATTATCAACCATACCGTCTTT
TTGTCTACGTGTATAAATGAGAAGTTTTTTTTCTAACTATATCCAAGTTTTTCAAACTAC
CCAAAGGATATTTAACTTGGCGGACAAAATTACCGTCACGTTCAAAAGTGAATATATAGG
CGATTCTGGGTAACAAGCAAAAGTAAACTACAATATGGAATAGTGTAAAACTTCACTTAT
CAACAACAAAATCGCTTCAAGCCTCCTATCTTAGAGTCTAGAGCCTGATAAAATTCTTAT
GCGAGCAAGGGCAACCTGATCGAATTTTATAAAAACTATTTATGGACTAAAAACCTACAG
CGCTCTTCATCATATCCCTTCCCGTTTCTTCCATTGCGTCATTCATGGTTTGTCCCATTG
TGGTTGCATAGTCATTAATAGTGGTTTCTACCGTGTCTAAACGAGTTTCAATTGCCCTAG
AAACACTTTTAAGGACACCATATCCATTACTTCTTCCAGAGCTTCTTACAGGTCTGGCAT
ACCTGTGATCTTCCGTACCGGGAGGTAACTTTCTGGCTGCATTACTACTACTGGAAGATA
TGCATCCTCGAGCAATTGCGCTTTCCTCATACTTCGATTCGGGCCTTTCTATACCGCCCA
GTAGCTCATCAAGTTGATATGGTGTGCAATAAATAGTTCCTCTAGCCCATTGTAAGGAAT
TCACTTGAGGCCTATAACCAATCTTTAAATCAGGATTGTACAAGGTATCAATAGGAGTAT
GTTGTGATATGTCAGCAGTATGATTCGTTCCGGTGGCACTTTCATTAAGTACTGAAATCA
AAGAGGCTTGGAATTTCCCTGTGCGAATGACAATGTCACCATTTTCTAATATAGATGAAT
TTTCAACGTATTGAGCGCTTAGAGGGACCGGGCAGCGTAGATTTTTGACTTCCTTAAGCT
CAGGTACTGTCAAAACTTTAATATCTCCATTAATTAGCAAAACGATCATAATAGTTGAAA
GCTTTCTTTCTCCTTTACCGTCAATAATGGGAATAAATGATAATCCACTAGTGGCAATTG
GATACTTGAAAAGCGCATGAGTGTCCTTAGATTTACCTGGTGATACTAAACGAATGTCAT
TTGCGCCACTGATAGTAACAAATCCAGGTATTGCGATACCCTTGCTTAAACCCTGCATCT
TTGATATAGTAGCAGAACAACTGTAGCCAGTATCTTTGGCAAAAGAATTTATTCCTAGAA
TTTTTCCTTGATTGTTGGTCTTTGTTGCATCAGTGAATTTAACCTCAAATCTTCCATTAG
TTGCAGGCAGTATTTTGAAAGTCATCAATTCCCCGATATCCGTTCCACATAGCATCAAAA
TACTAGAGAACCCATCATCTCCATATTCCATGACGCAAAAGTGAACGGTTGAAACGTAAG
AGCTACCAGCTTTAGAAATGACCCTAATATTTTCATTGAAGATTATAGCCGGGCCTCTTC
TGTCCAATATTATTAAGGTTCCTTCAATGAAACCAACGGCAACGAACCCGATATTACTAT
TCATGATTGCGGACACCGCACCTTTTTTAGCATGTATTACCGTACTTGGTATAAAGCCTT
GTTTAACGTTCGTAGGCCCTCTATCCGAAACATCAACTAAAATAGTTTTTGAATCATCCA
ATGAAAATCTGCTAAACTTCAATTGCAGTGCATCGCTTTTGGGAAGTTGTCCGTAAAACT
TGTTTGTTTCGAATTTGAAAAGAATAACATCCCCAACCTCAGATGATACCGCCAATTCCA
ATGTTTCCGATGCAAAGGAGATATTTTTTATGGCCAGGTTAGTAGCTCTGTTAAGTACTT
TAGCAGTATTCACTTCAAATACAGCGTTGTCAGTTACTTCACTGTGTGAAGCATCCCATA
TTCTGACTGAACCATTACTATGCCCAGTTAGTAAAGCAGATCTGGTCTCATGCCTTCTAA
TATTTCTGGTGGCAGGAATACCACCTTTTAAAAACGATTCACTTTGAGCGATTGTCATCA
TCCCCAGCCAAAGATTTTTTTGAACTGATTGCGCTATACAAGTAGTAACCGTTGGTCGAA
CCCATGCTAAGCTCCGAGGGAAAATGGAGGCCTTGGAACTAAAAGAGCCTGCTGGGTATA
TCAATGTTTCAAGTTCGCCATCTTCTAAAAGTAATAAAATGAGGTTTGTGTCATGGCATC
CACCAAAATATGGAGAAGCCTTCGGCAAGGGTAGAAAATTTATTAGTGGAGCTTTGCCAA
TCAACGAAAATAGTTTTTGTTGAACCGGTTTAGCATAGTACTTGCTCATTGCGTCAAATG
ATGTCACAGAATACATTGGTGTGCCGCCTAAGTCAATCATGGTTATTTCCTGAGGTAAAC
AGGGATTTTCTGTAGCTTTTGTTGCAATCAACAACGATGTATACTCAGGATTACGCTGGC
AAAGCCAGCTTACTTTAAAGATAGCGGGTGTTTCTGTAAAGGAACAGTCTTTCAAGGCAG
GATTTGGAAAATTCACATGTGTTTCAAATATACTTCTAGCGTGAATCAGTTTACCGCTAT
TGACATCCCAAAATACCAAGGAATTATCTTCATGGACAGTTAATATATGTAAGGAATTTG
GGTGATAAAGTGACTGAATGACCTTTGGAGTGCGTTTCTTTTCTATGTTTGTGGATAGAT
CACCGCCCGGAGCATACGGTTCTAATTGGTAAAAAAAATGTTGCTTGACTTTGTAGTCAA
TGAAAGAATATATGACTGTAATATGCTCATATGATATAAGTATCGTTCCTATGTCTCTAG
GATTCCATTGGATAGAAATAACCGGTGATAGCCTCTCTTTTGGCAAAAACACACTTTTCT
GGAAGTTTTCAATTTTCAATTTGGACATTTGATTTCTATCCACATCATAGATCAATATGG
ATCCACTCTCGAGGCCAATCAGCATCCAATCCAAGGACGGATCAGTCTCAATACAAGTGA
TGCTGTTTGGACAGAAAACAGTAGTTAGAATCTGTTTCGAGTGTACTGAAAGAACTATTA
TGTTGCTCTTCTCATCTACAGCTATCAGATAAATTCCTTTAATAAACCGCATGTGTTTAA
TTTGAGGTCGATTTTTTAACGTAAATACGACCTCTATTTGCTTTTGCCCATAAACATGTA
TCTCCCCAGCAGTAGTTGCAACTGCCAAAAGGCTTTGAGTATAGTCGAATGTGGTAACAG
TGATTCGTCCATTTATGCCGTATGTGCATATTTTCTTAGTATCGAAAAATTTGGAGTTAA
TACCATTTGAGACGTCATGAACTCTCGCGGATTTGATAGCATTTGACACATTCTTCAAAT
GCCTGCTTTTCTTAAACATTTATAAAATTTTTGTATCTGTTCAATTGACAATTTTGTAAC
TTTTATAATCTGTCAACTTTAGAAATATGTTAGTAGTAATATAATACTGAGCTGTTTCTT
AAATGCTTCCTTAATAATGTAAACAGAATGCGCATTGTTGAACATACGGCTTCGCATCGC
ATCGCTTAAACGAGGTTTTTCATATGCATGCTCCAAGATAGGTACGAACAAAAAAGAGGC
ATTGCATCAAAATGGATAGTTTCAGTTTATGTAACAAAATCTCATTAAAAAAACCCTCTC
CTCCTATGAAGCGGAACAGTTCAACTTTTCCGCTTAGATGTTTTATATAAAATTAAATAA
ATCATGGCATGACCTTTTCTTCATAAATCCAAATCATCTGGCATAAAGGAAAATCCTCTA
AACTCTTCTTGCTGGCTCGTTGTCAAAACAGAGGGCAGAGGTGTAAGTGTGGGTGGCGCA
GAGGTGAATTCTTGCTCGAAATATGATGTATCTTCCGGAGATTTAATTTCTGGGATGTAG
GGTGGTTTCACGCGAAGGTTTAAGATATCGTCAAAGTTGATGTTACGGAAGAAAGGTTCT
TCCATAACTTCGTCTGCGTCCCTGGGACCAGCACCCAACCTCTTTTCAGGATCTTTTGTT
AATAGGCCTTGGAATATTTGTACAATCTCACCTGCCATATCTATTGGGTATAAGGGTTCA
TCGGTAAGGATAGCGTTAAAAACTTCATCTTCGTCATCTCCTGAGAATGGAGATTGGCAC
AGTAGCATTTGATATAGCAGCACCCCAAATGCCCACCAATCGACAGCTTTGGTATATTCT
TGCTCTTTTAAAATTTCTGGAGCCATAAATTCTGGTGTGCCACAAAATGTAGAAGTTCTA
TTACCATACCACATTTCATCTTTACACAAACCATAATCGGCAATTTTTATATGACCTTCT
GGAGTTAATAGAATGTTTTCCAACTTCAAATCACGGTATATTACACCATTATCATGAAAA
TATTTCAGAGCCAGTAAGACCTCGGCGGCATAAAATTTGGCCCTTCTTACAGATAGTCTT
TGGTTTTGAACATGCCACATTAAGTCACCGCCCCCAATAAACTCCATAGCAAAATATATA
CGGTTTTCAGTTTGAAAAGAGCAGTATAGATTGGTTAAGAATGGGTGTTTAGTTTTTGTG
GCTAACAAAAATACTTTCTTTTCTGCTCTTGCACTCTCGATGTCATGATTTTGAATAATA
TTATCTTTCTTCAGAACTTTTATGGCACAAAGCCTGTCAGTATTCTTTGATTTAGATAAA
ATAACTTTACCAAAATTACCTTTACCAAGAACTTTGAGTAATACGAAATTATCTAATGAA
ACCTTACGACGTTTAGCCGCTCTCTTTTTATGCTTTGCGCTTGTGCTGGTTTGTGATTTC
TGCGGAGATTGTTGATCAGTGGTTCTGGAGGCATGAGTACTTGTAGGAGCCAAGGACACT
GTTTCTTGTAGTACTTCCTTTGAAGCATGGTCTTGTTCAATTTGAAAGGTTTCACTATTC
ATATCGCGGAATGGATTTGTGTGTGTGGAATCTATTGTCAAATCAGCTTCACGGAAATCA
TTTTTGTTCTCCCAGTCTAGTTTCTGTTTGGTCTCTAAATCAATGTGATCAACTTCTAGA
TCCTCTTGGATTTCCCCACTATCTTGTTTTATTTCAAGTTCCATTTCCTCACGTTGTGCT
TTCCACAGTTCAAGTTCATCTCTCATTAAATCATCTTTAGATTCCCAAGTTTGACTATGC
TCAATAGATAAATCAGTGAGTCCCAAGGAACGTCTATTCGACGTTGGATCCAGTGTTTTC
TCTGGTGATGAAAATTCGGCGGTTTGTTGTGCACCTTCTGTAAAATTTAAATAGGCCTCA
TTTTCATCGATAAATTTATTTAGTTTCTCACGCCCGTGCGTTTGTAGTGAAATTCTTTTA
TCAATAATAGGATCATGCTGCTTAGTTGGAGAATCTCTTCCTACCTTCTGAGGCGAAGGA
GTTTTATCATGTTTTCTTGGCTGAGGAGGCAAAGGAGCGTTTGCCCTTTCAGCTAATTTG
GATGGGGAAAGATCACTACCATTGGCAGTACCAATAGATGACCCCAACTGTGCCGACGGA
ACTGTCCTCTTCTTTTTCTCTTGATTACGTTTTGTGTCTTGAATCGTTTTCAGAATTTTA
TTAGCCATTTCCATCGACATGCCACAGAAATCGGGAACCAAATGAGCACATTGAGCATGA
CACATTATACCACATTCAGAACATTTGCGTACTTTATGTCTACCCCATGGTAAAATATAA
CCACAGTGACAGCACCATTTAGTACCACGGTTTGAAGTAGGCAGGAATCTATGAGGAATA
CGGTGGTTCAACTTTGCCTCGTCCGGATCCGTATCAGTAGAAGTTTTAGCAATACACTTA
GTAACAACATTGGTGTAACATTTTTTGTGACATAAAAATTTACAATCTTGACATTGGAAC
CCAGTATACCGAAGGAAATCACCACAATATGCACAGCACATAATGTTGTAAAATGATTTT
TGTACAAAGTGGTGGCCATGCTGTTCGAATATCTCTTCTTTCCTATTGATAATAGCACCA
TGACGATGTAGTCCACCCATCAACTGCTTCCTTTCTATTTGAGAAGACTTGTGGAATCCT
AGTGTTAACAAAATCTGCCCGGATGGTTCTAAGACAAACCATGAATTCGTACTGATTTGA
CTAGTTGATGTATTTTCGCCTTGCACATTCTTTGCTGAAGTAGACTGAATGGCTGAGTTT
GAGTATGTAGAAGTCAATGTGCTTCCCTCTTCGCTAGCGAGAGAAGAACCACCATTAATG
TTTGAAGCGTTGACCCATCCTTGTTGTTCATTTGTTTGTCCGGCTTTCTTCTTACGAATT
TCTTCAGCGATATCGGAAAGCAGTAACCACATTATAGCCACTGGAATGAGCGAGTCGTTC
ACCTTATCATATACAGTAATCTCGATTTCATTCCCTTTTTCAACTGGAATTTGAAAATCT
TCACTCCACCTGTCATTTCTAGAAGGCTTCGTTCTGGCTTTGATCGTATCATCGATTTTT
ATAGTAACGTAGCTCTCTGGCTTCCTGGCAAACATCGGTGATTGTATATGGTCAACATCT
CTAGCAGCAGTTATTCCAATTGTTAGAACGCCAGTCAGTTGTTTTCTTCGGAATTTCGGT
TGTTGATTATCCATTATGTCATTGGGTTGGTGTTTAAATTGATCAAAGTCAACGTTAATA
GCTTGGTATTTCTTCAAAGCTTTGTTAAGCATTTGAATCCTGTATTTGGATTCCATAGCA
CCCCCTTCTGCCGCAGAACTACTACGTTGATCACCGTCAATTTGATACAATTTAGTCAAT
TTAGTATTGGCTTCTTGGTATTGCTTTTCCACCTGTAATTTGAATTCTAATTGTTGCAAC
ATGTATTGGATTCTTTGCGCCAAAGAAGGGCAATCATATTTTACTAAATCCAAACGAGAA
AATATGTGTTCATTTGGCGATTTGGTAGAAAGAAACCCGTATTCCTTCGAATTGCATCGC
TCATTATCTTCGCTGCCATTTTCACCCTGACTTTGTTGAGCGGTCTTCAACCGTAATTTT
TTTAAGCTATCCTCCAAGTACTCAAGATTTTGACGTGCCTCTCTAATATTCGTATTACAT
TTCTGAATGACCATAACATTGCTAGTCTTTTTCTTGAGGGCAGAAGCTCCCCGAATAATA
TTTTCTTCGACGGCTATCTTTTTTTTAATGTTCTGCTCCAATTGTGAAAAACTCATGACT
GTAAACTGCTCCCTATATGTGTGATACTATACTTACTTTTCCTCGCTAGAGCTTCTCTCC
GCAGCTACTGTTCTAGGTTTTATTCCTATTGATTATCTAATATAGTTTTAAAAATCTATA
CTGAAAGGGGATCGACGCTGAATACCTCTAACGTAAGTGTGGACGAGTGGTGGCAGAGAC
TTTTACAATGGTTAATAATCAGTCTCTACTCAGCCAAATTGAATAGCAGTGAAATCGTAG
CTCTTTTACTGCTCCTGAACCTGTCGTATTACTTTCGATAGAGTAGATCAACTTTATTAT
CCACGCTTGTTAACTCTTTTCGTCGGTTTTTTTCGCCTTTAAAACTAGGCGGGCTGGGTA
ATGAAGATAGCAATGCCTCATAAATACAATGTTATACTAATTACGTTTTTTCTTTGGTTA
TGTATATATATTGTGAGAATAAAGAGAAGTTGCAAGATTTGGTTTATTGTACAATACTAC
TTATTACACTGGCAGGTGCAACCTGGAGTGGGACAAACATTATGTCTGTCAAACCATTCT
TCAGCGTGACCGGCATGCATACCATGGTTGCAACTCAAACAGAAGCTGAACCACTCGTTC
AACTTCAGTTTTCTACTTACGAGTTCGCGATTTGCACCATCTTGAGAGTCTTCTGTCTGC
ATTGGATCGCGTGATTGCGTCCCATTTATTACAAAAGGTAAGTTTGACGTTCCTAGAGGC
ATGAGACATATGGCACATCTTGGAAATGAAGACCCACAGTGTGGGCAACAATACTTATGT
CTTGGCTTTTCATCAGCTGCTTGTGCTTCAGAACTTCCAGTATTAAATTTCTTGTAGTCA
GCGTTATTTCTTCTATAGGCTTCACCATTTTTGTAATTTCCAGCACTAGTAGAGACGGCG
CTAGAAGGTGAGGATGTGCGCGGAGTGTTGATGTTTTGTTTACAGTTTTGACATTGGATA
TATATTTGCCGGGGCTTTATGTCTGCAGTTAATACACCAGTTTTAGTTCTCGATAATTTT
GATCTTAAAACATCGAACCTGGCTCGCATGGAGAATAATTCCCACGATTTAAGCATATCT
CTATAAGTTTGTATCCATTCATCTACTCGTTGGTCGCGGAAATATCTAGGGGAGCCGAAA
ATTGATATCAGTGCGGCACTCTGAACATCGCTGGTTTTATTAACGTATGATTGCAGTAGA
TCGATACCATTAGGTGTTATTCCGGTGAGAATTAAACCTTCTAATTCGCCGTTTTCAATA
ACTGTAGATGAAGTTCTATCTAAGAAAGTGGTTAGGTCTGTATCATTCAAAAACCTTAGA
GCTACCCCTAATCGTTCTCTCAAAGATATGGCAGGTTCATAAAGAATATCCCACCAATCA
TTGTCTGCGATAAAGGCGAAAATAACTCTCAAGTAAGGATCATCTAATTCGGAGGACATT
TTTCTGCATTGCTGCCTCCATGCATTGTTACCTGGCAGATCCTTATACGCCAAGTAACCT
GCAATAGCGGTGGCAATTAGTCTCAATCTTTCCTTTTTTGCAGATCCCAATATTTCTACA
GCCTTTGGGATATCACCAAAAAATACCGCCCAAGCGGCAGCTTTTTCATAATGGCCGTTT
TTCATAATTATGTTGTACTTGTCTTCATAATCAGATCTGGAAAGGTCCCATCCTGAGATA
ATTAAACAGAGTCTTCTCTGAACGTACTTTGGTGAACCAGCGGCATTGGCAATAGGACTG
TTCCGATCCCTATTTTTCCTTCTTAGTTTGATGATTTTTTCCATTTCTTTATTTAGTTGT
TTATCAGAAAGAATTGTCTCTTGTCTATATCTGTCTTGGTTCGATATTCCGTTTATACCA
TTCCAAATACCTATCACACCTTCGTAACCTAAGTCAAGATCACCAGAAACCATCGTACCA
TCGTCAACAGAAGCCTTTGCAATCGCGATCCACCTCCATGTGTTCCTTATATAAGCATTG
TTTTGTAGATTTTTAGAAGAATCAATCATCTCTACCGTGTTCATTGGATCCAAACCATAT
CCCAATGAAGCTCGCGTCCTCATTATTACACTTATATCTTTTTCCAGAAGTTTTTCTGGC
TTCCAGAACAGTTCAAATCCACGCTTACTGTCAAGGACATCATTACTCCCTTCATTTTCC
TCTTCACTCAACTCGGAGTACTCAATTTCATTATTAGGTTCATCATGTCCAGACGGAAAG
TAATCTTCGCTAACATCTAAATCCTCAAACGATAGATTCTTTAGGATTGTTTTTACATTC
TCTAAGTTGGACTTTTCATGCTCATTGTTGACTCTAATTTCATCTATCTCAGTATTTTCA
AAATTTGACAATAAGAGAGAGTTCCTATTATTGAGTATAGCCTTGGAGCATACCTCTGAA
ATTGGCATTCTGTATATTGTTCCCGATTGTCTCATACAGATTAGACTTGTTCCATTATTA
CTTCTTGGAATATAATCAAATGTAGCAACTCTATCGTACATCGTATTTGTGTCATGCACG
GAAGAAACAAACAAATTCTCAATATTCATCTCGTTATCGTCATCTGCCGCAATATCACGA
TTGCTATCGCAGTAATAGCCTAACCTCCATCTTTTGATGGTATCACCTCTATGTAAGGTG
GCAAATTCATTGTTCCTCACACATGACCACCTAAAGCAAGAGTTCATGTATTTCCTTGAC
GCTGCACCGGATCCAACCAATTTTTCAAAAGTTAATAAAGGGGAAGCTACATTTAAATCA
CCAAGTGAAGCTTGGTCAGATAATTTTCTCCTATCCCAAATAGCTAAGGTCCCATCATCC
CCATAAGTACTAAATTGCCAATCGTTAAACGGGTTCAGTTTGATATCATACGTCAATCGT
GTCGGATGTTGATAAATTGGGTTGGGGGATCTGACGTCAATTTCTTTCAAAAATTTCGTA
CTTGCAGCCAATACACTGGTATCGTTGAGGAACTTTAGGGATACTATGCTTTCATTTGTG
CAATAACTAAACATTGGGTTGATAGTTTCATGCGAATCATCATGATAATTCATGTCCCAA
ATTTGTAAAGATGAATCATGCTTATTTCTGTCAAGACCCATTGCTATAAGACCATTCGTA
TTTATTCCCAGAGAGTTTATACACCGCTGCTTCTTTGCTCGTACACGTATATCATAATTG
GTTTCTGAAACAGGGTACCCTTGGGTATCCTTTAAATTTGAGACAGATCCAACTATATTT
TCCGCCTGAGCTGCCTTACCACCGCTGGCATTTGTCATAGAAGTCTCGTTATTGGCATTT
AAGCCCACTGGCGCATGGCTCGCTGGCGATGAGGAATTTTGTCCAGAGATATTAAAAATC
CTTAAATATCCATTCTTTTCACCAACTCCAATCATACCAATTTCTGATTCTGAATAGTCT
AAGCAGGTGATACTGCCGAAGTCTTTCACAGTGTGTAATTTAATAATTGATTCATCAGAT
TCATTTTCCGGATCCACTTTATAGTGGGTCACTTCATCTCTTGTAGGGTTCACTGAAAGA
TAATCAATCAAATTATCATATGACCAATGGGTCACTTTTTTGATGAGACCCATGTTTATT
CTTCTATACGTTCGTGATACTGCACTTACGACTACCAGTAACATCAGAATAACCATAGAG
CTTATGCTATCTTGAAATATATCATCGCCGTAAAGTATGATGTGTAGCGCATTAGTCTTC
TGCATTCATATTATCAGTGGTATACCGTTTGGTATATGCTTTCCAATCATGAAGTGTTGG
CTCTACTCTATATAAATTCGACATCCATTGATTTTCTCAATAAATGAGTTACCCAAGTAA
GCTTTCCATTGATACAAGTGATCTACATTCTTGCGACGCCAAATTATAAAGCACTAAAAA
TCATATCATACCCAATTGCGGGCAGCACATGTATATATTATACACTACTTATAACTAACC
TTCTTCATATATAACAATATGCCTGATAATACTAATGCATTTAAATCATATCATGAAAGA
AAATTACATGGGTTTTATTGACATAATTGCATTTAGAATACATAAAATTCTAAAGAATTA
ATATATCCAAAGTATTAGACATAACCAAGAATAATAGTGAATAATTTTAGATTTTGTTAC
ATATAATTCTGCTTGCCTATCTCTTCCACTCTTTTCAAAACGTTGCATGTAAGCGTTACT
AATATTCCGCTTTATTTTGTTGCAATTCCTAATTTTTTCATTACATTATCTTGCGAGTAC
GGAAGCGATTAACGTTCTCCCAATAGAAGGAACAAACATAGATATTGAAGTTTTACTGCT
TTTGCTTACCTGACCTTTTTCAAATTTAATTTTTTCCCGCTAATAAGACCATAAACTACC
CCGAACCAAATTCTAAAAGATAGTCAGCTGGATTAGAGTTGTCATCTCCAAACATTAATT
TTGCATTATCTTCGGCTTCAATCAAATCGCCTGATAAGAACTCCTTTAATTCTTCATGAA
TGTTTGTATGTGGATGACTCTCCATAGTGCCAGCATGATTGTGGTTACCGACCGAATCAT
ATAACGGTGGCTCCCAATTGTGCAATTCAGCCTTACTATTTTGTTCATTCATCAAAGCAT
TTGGGACAGATCTAATATCTATAATTCTTTCCTCACTATTCTCGCTATTATTTTGCCCCG
AACTGGCATGGTGGTTATTGGTAAAAGGAGATAATGCTGCGACAGAACTTTTCTTCTCTT
CCAATTCTTTTATCTTCGCCAATAACGCCTTCTTTTTTCGTGCTTGTATTTCTAAAATTT
CGGCCAGGTATTGTAAATATTCGACCGTTCTATCCAAAATGATACCCTTATTTGGTTTGA
TTTGTTTACCTAGGTCATCGTAATTCAATAAAGATGGTGGAACCAACTGGCCGAGTTCTT
TTATCTTTTGCTTTATTAATTCTCTTCTTCTCCTTTCGACGGCATTATGAAACTCTCTTT
TGCGCCTCAGTTTCTCATCAGAAGTTAACCCGCCTAAAATCTTTGGAACACTTCCAGGTC
CTATATTTTCAGTCATATTGCTACTTATTGAAGTGTGTCTTGTTCTGGGTGTGTTTATGC
TACCATGCCTAAAAGAAGATGAAAGGAAACTTCCTGCACGAAATGACGATGATGGTGATC
TTACCTTTGGGGAATATGTGGAAGATACGGATGCTGGGCCCAAGCTTTGTGGATTATAAG
AAAATGATGATGAATATGTGTTTGGTGTCATCATATCAGAATTGATGCTAGAAGATAAAG
AGGAGCTCAAATCATCAGTTAAGTTATACATTGTGTCATCGGTGCCATGCTGAAATAAAA
AGTCATGTGGTAACTCAGCTTTTAAGCCTTCTTGTTGCTGTAATGGAGTATTCATTGCTC
TATCCACAGGTGAGTCGTAAGCCATAGAATAAGATGATCTCAAGGGACCCTGCCCTATGG
AAGATATGGAATTTTGAGTGACAGGTCTACCGCCTTGGCTTGTTCTAAACATATCATCCA
GGTAAGACGATTGCGATTCTGCTTCCTCATATATGGTCGAAGCTGTAGGAGTTTGTGAAT
TGGACCTCGCTTGACTGCCCATTAAGTTATTATTATCGTTAGAGTTGTGCGTATTGATGT
ATGAGAGTTTTTCATGCTGTTGGGCAGGAGTCTCACCACCTGGGTAGGCACTTCCGTGTA
TCTTGTAATCATCATTGTGGTGTGGAGTGGGTGTCACTAACGAAAAATCTAAAGTTTCCT
GGAGGACTTTTGTCTGGTTCATTAATTCGTCCAGTAGACGTTGGTTCTCAGCCTCACTTT
CGTTATTGTTCATCATTCTTCACTTATTTAAGAAGTAGGTTCGCCTGACAAAAAATAAGA
GTATTCTATTAAAGGATACTTGTCAACTAAGTAATGTGAATGCAGTAATGTCGTTTTTGT
TATCTTATATATGCTCACGTAAGACAGAAATTCGGATTGTGAAAAATTCCTTGATGATTC
CGTGCAGCCTCTAGCCAAAATAGCAACTGCGAGTAAAAAATAATGTACTAACCTGCAGTA
ATATTGGAGATCCTACTGTCCGGACCGAGTAGTACAATTGTTAGTTTCTGTTGCTCATAA
GAAGGCTTTTCTAATCACCATGGCTTTATTATTTCAAAAGTAACTTGCGAAGAGTCACAT
CCCGCGGAACGGCCCGCAATCGTGACCCGGCAAAAGGCGATTGTAATGAAGAGGGAGTAT
TGGTCAAGACTTGTACTATACTGAAATAGGAAGAAGATTGAATAAATTTGCATTCTAATT
GCGTTCGGTAGTTTAGAGTAGGACTTAGATTACCTGTATTGTCTGCAGTTGCGTTTTTTT
TTTTTGCTGGTAAAAAAAAAGAACAAGTGTGGAGAATATGAGCGAGGAACCACCTTCTGA
CCAGGTCAATAGTCTCCGTGACTCATTGAATCGATGGAATCAAACAAGACAGCAGAACTC
GCAGGGTTTTAATGAATCTGCGAAGACATTGTTCTCAAGCTGGGCGGATTCTCTCAATAC
CAGGGCCCAGGATATATATCAGACGTTGCCTGTATCTAGACAGGACTTGGTGCAAGACCA
GGAGCCGTCGTGGTTCCAATTGTCAAGAACGGAAAGAATGGTACTTTTTGTCTGTTTTCT
TTTGGGTGCAACAGCCTGTTTCACTCTTTGTACTTTCCTTTTCCCCGTTCTAGCCGCTAA
ACCAAGAAAGTTTGGTTTACTATGGACAATGGGGTCCCTACTATTTGTTCTTGCGTTTGG
GGTACTTATGGGACCACTCGCGTACTTAAAACATTTGACTGCAAGGGAAAGGCTGCCTTT
TTCGATGTTCTTTTTCGCCACATGCTTCATGACGATTTATTTCGCAGCCTTTTCCAAGAA
CACGGTGCTGACTATTACATGTGCTCTTCTTGAATTAGTTGCCGTCATTTATTATGCTAT
TTCATATTTCCCATTCGGTGCAACAGGTTTGAGGATGTTAAGCTCTGCTGGTGTCAATTC
GGCAAGAGGTGTTCTGCGCATCTGAATTATCATTCATAGTGCATATTGAATTGATTAGTT
GAAGAAGAAAAATAATGTTTATGTTATAAGAAACAATAATAAAGAGATTTATAACCTAAC
CTAATTAAATAGCATGTAGTCAACAAAAAGGGAGTAAAACATGCAGTGGCTCTATATATA
TAATTATCGTAGAATAATTCAAAAAAAAATAAAAAACGAAAAAATTCATTCTTCATCACT
CATCAAAGGCACTATTTCGTCATAACGCGGAGGCTCGTTACCATGAGAGAGTAGCGAATC
TGCGGAGCTCGAACTTACTATTCCTTCTTGTTCTTCATCATCTTTTACATTCGCTAAAGT
GTAACCCTTTTTGAAAAATTCGTTCTGTTTGTCCTTAGAGTTTTCAGTGGTAGCGTTTGG
AATCCTCACAGTACCATTTGCTTGTGATAAGCCATTTGTTGGTGATGAATTGTGAGATCT
ATTGACGGGCGATGGAGTGCTCAATAATTTATCGAGATTATTGAATCTTGACCTGTCATT
CACTGACGTTGCTCTTGCTCTAGCAACACCTTGGCCACTATTGCCCGAAACAAATGCGGA
ATTCGAAATACTGCCGTTCATGGCATTGGCATTTGAAATACTGTTCCGATTAACATTTGG
CACACCGGCATCATCGCTGTATCCGGATGGCCCACTAACTGACGTAGTTCTTGATAAGTT
CAATTGTTGAATAGATAGTAAATCAGGGTCATACGAGGCCATGATATTAGGTGATCCCAT
CGGTGAGACAATGGGAGAAGCTGGAACGGATATGGCTTCTTCAAAAGTTGGCGGAGGTGG
ACATGTGTTACCAAAAAAGTCGCTGTTCATACTTAGAGGAACCTGGTTGCCTTTGCCTTC
CATTGTGGCCATATCATAAGTGGGTAACTCCATATTACCACTGTTGCACTGTTCAGACAC
CAGGAATATGGGCGTATCGATTAGAACCTCATAATGTCTTAATTTGGACGGACACTCAGG
ATCAGGTTTACTGATTCGTAGCATAATTTCCAGCTTATGTCTACAGTAAACATTACTGAA
GTGTAAACTATCCAAGTACAAGCCTCTTTTCGGTGTGTTTAATCTGGTATGTGTTTTCAC
GGGCAAACCAGAATTGGATTTGATTATTGTTTGATGGAATTTTGGATCATAAACAGGTTT
TTCATTTTCTTCATGACTTTTCGAGCCTTTATGACCGGATAAAAAGCCTATTACACTGGG
ACGACGGTGTGAGGGTCCATTGGCTACGGCATGTTCGGGATTGGGGATGCTCGTGTATGC
ATCGATACCATAAGGTGGTATTATCTTTGCGGTTCTTTTATCCAAATCTTCGTATTTGGG
GAACTTCAATTTTGTTTCAATAATTATTGGTTCCGTTATACCGAGCCTTTCTTTCGGATT
GCCTTTTGAATCGCTGTCGTCATCAAAAGGACTATAAGATAAGAGATTGTCATTGAATGA
ATTTTCAACAATTTCCTCCCTTAGAGCTCTCGTGCCCTTCTCCTTAGTTCTGATTTCAAA
TAATGATACACTTCTTTCCTTTCTTCTCTTGGAGGCGAAATCTAAATAATACGGATTATA
AGGGTCTTTAGCAACGGGATCTGTTTGATCATACTCATATTCATAACCTTTACTAACAAA
TGTGACTCTTTCAGTAATACTGACATGAATACGTTTAACACAAACGTTTTTGCATATCGG
TGCCAATTTTATCTTGATTGGGACTTCACTGTTTAGTGAAACGTATTTCTGAGCAAAGGA
AATCTCGTATGACAAAGAATCTGTCCAAACCCTATTAATATAGATTGGTTTATTCGCAGT
GGATACGGCAACGGGCGGTGGAGTTCTAATAACTTTTATTGGATACTCTGCGAAAATGTC
CTCTTCTCCTGATTCTTCATTTTTCAGTTGATGTGAGCTCATGTGTAGATGATTTTTAAC
TTTACTAAACAAAGTGTTGCTTATCCTCCTATGGGCCTGAGCGGATTCTGTTTCGGTAAG
TTTTAATGAAGATGTAGTGGAGCTTAGTGATGAAGAAGAGTCTGGCGACACAATAGGTTG
CGGAGAGTTTGAATCTTGACGATAGAAACCCTTTCTATTGATTGCCTTTGTTGCAAGCCT
TAGTCTGTAACTAACACGTGCAGAGGGTAAATAGATAGTCTCCGGAATATGATTAGAGAA
AACCACTGGTACTAAGAATACATAGTCTCCAGGTTGGTAAAGATGAGTCTTATTTACGTC
TATGGCGTTTAAAAGGCTGGCTTTTGTTTTAGTCTTGTCCAAATACAGTCTCTCCTCTGT
AGGAATATTCTTGAACAACCTCATTTGACGATCGTTGGAGTTGTTTTCAATCATTTGATC
ATCTGGGGATATGCTTAATGGTACAAACAAATCGAAGTTTTCATCATTCAAATTCCATTT
CATTGATGCAGCATTATAAAATTCTTCATTAAACGTCTTTGTAGGAGGAACACCTGTATT
CCAAAACACTTTAACCCTTGAACATAATTCCAATTGCATGTCCGTAAATCGGGTTGGTTT
TTTAACGGATACTATAACTGCTATGCTGTAAGAGACCATGGAACTGTCGATTTCAACAGA
CCTTGTATTAAGTTCCGAGCCGGAGCCTGGATGGTCTCCTGAATTATTTTCTCTCAGGAG
TGTGTCTCTATTTTCATTTATGCTGCCACCACTTTCGGTAGCCGCTGCCGTTGTAGCGAG
AGATGGAGTGTTACCTTCTTGCTGGTCTATACCATCCATAAAAAAATCCGCCTCAGCATC
GTCCGTACCATCATTGAGTCCGTTTAGTCTGGACAGGTACTCATCGTCATTCGAGGATAT
CGTTGGTAAGAAAACGCTTTCACCGCTTGTAGAAATAGAAATCTTCAAGTACTCATTGGA
TAGAACGGTTTTTGGGCCCAGGAGACCTCTAGCGGTTAAATATTCTATGAGAAATTGCTC
GTTAAACTTTTTCGAGTTTGCCAACCTTGTTAGAGAAGTTGATGATAAATCGCTTGACAC
TACAGCTGATGAGTTATGGTCATCATCAAAATCTAGTACTGTGCTATCCTCCTCAATCTG
TGAATAGCGTCCCCCAGAGATTCTGGGCTCTTGGTCTACCGACAATCTTCCCGAAGTGCG
ACGGTTGGTGTCGGAAGTCGAGGATCTCGGAGTCGTAGTAGCACTATCGCTGATAGAGCC
CTGTATGGCAGTGGTACTGTGTCGCCTTGCGTTTGGCGGCGGCTGTTTGTTCTGTTTTTT
GCCAAGGAGTTGGGCGTCTGTATTGCTGCTTCTGATGTTGCCGTTATTATTGCCGCCTTT
CGTTGTGTTGTTCAAGACGGCAGGTGAGTGAACATTAGCGCCACCAAGTAAAGATGATAG
CGCGTGCCTAATGGTGGAGGATCTTCTTCGTTGTTGCATGGACCCTAATTTCTTGGTGGG
AGAGGGTTGAAACGGCTGTCCTTTAGACTGGTTTAAATCTGTTTCTGATAAAGAGTGGGA
TGAATTTTTCGCCACCGGTCTTGATGTTATAAACGGCATGCCCAATAGGGGTAGGGAAAA
ATCTTGCTTGTTCTTCTCTATTTAAAAGAGTCACCTTTCCGATGGACCTTCAAAAATATA
AACGTGGCTTATCTCAGAGCTAAGACAGACCTTCCGAGCAATAATAATGAGTCGTTCTAT
TTTTTTTTTCTCGTCCCTTTTTTTGTCCCCTCTTAACAAAATTAGAAATATAGGCGGGAA
AGTGGAGAACCCTTGGAAGAGTCAGATCAGAGATTGGAAAAATTAAGACCAATGGATATC
TACAGATCCTGTGAATCGAGTGTGAGTGATATACCGCAAGATCGGTAGAAAACTGTATAT
AAAGCAAAGAACTGATGTGGTGTAAACGATGTAGCGATGTAACAAGAGATACTCGGTAAT
GTAATCAAGATGCTCTTTTTTTTTTTTTGCGGCAATATGGTGTACGTAAAATTAAGGTTC
CGTGGAGTCTGTGCTTGCGAAAATGATATTGACGCATGGACTGTCGAAATAATAAATTTA
CAATTAAACACTTGGTGATTTGAATGTAATTTGAACGTTTAAAAAATTCCAAGGGAATAT
TACTGTTTCGGGAATATAACGTTTGATATCGCTAGCGCACCCAGATGAGAAATCCGCATG
GATGGGTTGTTAGTATTTCTATTGTGAAACCGCTTTGTTCTGGAGGGCGAGAAAAAGTTA
CGGTCACTCTATCTTTTTTATAATTTGGTCTAACAAACTTGATATCAGAACCACGTAGAA
GAAAAAGAGACTAATAGTAAAAATATCAAGAAAGTTGACCAATTTTTGTTATATATGTCC
GTAAAAGTTATGACTTGGCACTGGTCTTGGTTTACTCATCAATCAGCTAGGATCAGCGCT
GAGTGACTGCTTGCGGCTGGGCGGCTAAGAAATGGGAATATGTACAGTACAAATTCCGAA
CTTTGCGAGCCTGCCTCGATGGTTTTTTAAGGTGTTCTTTTCTTGCATACCAAAGCGTAC
ACTTGATGCGCCGCTTGACGTTATCTTGTTCTGGATGAGGCCTTATTTTTGGTCTTCATT
GTTAAAACACCCTATTGTCATTTAGCAGCCGATGCGATGAACGAAACTGCGAGGTAAAAG
CGCTCAAATCAAAAGTGTAGTATGAATGATATATAAACAACTTCAATAAAGTCACGCGTA
GTTAAAATATTGTTAGGGTAATATCCTGTGTCCTTCGAATATCTGTTGGAATAAGAAGCA
ACATCATCTACTGACTAGTATTCGTGATACTAGTATTCAATCACGTAAGGTGGAAGAGAA
TGACATGAAGATTGAGAAACAGTGATCAAACTCAATAAAGAGCTGAATACAAGCACATAT
AATTGTTGGAATAAAAATCAACTATCATCTACTAACTAGTATTTACGTTACTAGTATATT
ATCATATACGGTGTTAGAAGATGACACAAATGATGAGAAATAGTCATCTAAATTAGTGGA
AGCTGAAACGCAAGGATTGATAATGTAATAGGATCAATGAATATTAACATATAAAATGAT
GATAATAATATTTATAGAATTGTGTAGAATTGCAGATTCCCTTTCATGGATTCCTAAATC
CTTGAGGAGAACTTCTAGTATATCTACATACCTAATATTATAGCCTTAATCACAATGGAA
TCCCAACAATTACATCAAAATCCACATTCTCTACATGGTAGCGCCTATGCTTCGGTTACT
TCTAAGGAAGTCTCATCAAATCAAGATCCGTTAGCCGTTTCAGCTTCCAATTTACCGGAA
TTTGATAGAGATTCCACTAAGGTTAATTCTCAACAAGAGACAACACCTGGGACATCAGCT
GTTCCAGAGAACCATCATCATGTCTCTCCTCAACCTGCTTCAGTACCACCTCCACAGAAT
GGACAGTACCAACAGCACGGCATGATGACTCCAAACAAAGCTATGGCTTCTAACTGGGCA
CATTACCAACAACCATCTATGATGACGTGTTCACATTATCAAACGTCACCTGCGTATTAT
CAACCGGACCCACACTATCCGCTGCCACAGTATATCCCACCGCTGAGTACTTCCTCACCT
GATCCAATCGATTCACAGGATCAACACTCTGAAGTACCTCAAGCTAAGACAAAGGTGAGA
AATAATGTCTTACCACCACACACTTTAACATCAGAAGAAAACTTTTATACATGGGTTAAA
TTTTACATCAGATTTTTGAAGAACTCTAATCTCGGTGACATCATTCCAAATGATCAGGGT
GAAATCAAAAGACAAATGACTTATGAAGAACATGCGTATATATACAATACCTTCCAAGCA
TTTGCCCCATTTCATTTATTGCCAACATGGGTAAAACAAATTTTAGAAATTAATTATGCT
GACATCCTTACAGTCCTTTGTAAAAGTGTGTCCAAAATGCAAACTAACAATCAAGAATTA
AAGGATTGGATAGCTCTTGCCAACCTTGAGTACGACGGAAGTACATCTGCTGATACATTT
GAAATTACGGTCAGCACGATCATTCAAAGGCTAAAAGAAAACAATATCAATGTTAGCGAC
AGATTGGCCTGTCAACTAATACTTAAAGGTCTATCCGGTGACTTCAAATACCTACGTAAT
CAATATCGTACCAAAACGAACATGAAACTTTCCCAATTATTCGCTGAAATTCAATTAATA
TATGACGAAAATAAAATCATGAATCTAAATAAACCGTCCCAATACAAACAACACAGCGAA
TACAAAAATGTTTCTCGCACATCTCCAAACACGACTAACACAAAGGTTACAACTCGTAAT
TATCATAGAACAAATAGTTCAAAACCAAGAGCAGCAAAAGCTCACAATATTGCTACATCT
AGTAAATTCTCAAGGGTGAACAATGATCACATTAATGAATCAACCGTTTCATCACAATAC
TTAAGCGATGACAACGAACTTAGTCTTAGGCCAGCAACAGAAAGAATCTAAGCCAACACA
CACAATAGACTCGAATGACGAACTACCTGATCACCTTCTTATTGATTCAGGAGCTTCGCA
AACGCTTGTCAGATCAGCCCATTATTTACACCATGCAACACCCAATTCTGAAATAAACAT
AGTCGATGCTCAAAAACAAGACATTCCTATAAATGCCATTGGTAATCTTCACTTCAACTT
TCAGAACGGCACCAAAACATCAATAAAAGCACTGCACACACCAAACATAGCCTATGATCT
ATTAAGTTTGAGTGAGCTGGCTAATCAAAATATTACTGCCTGCTTTACCAGAAACACTTT
AGAAAGATCGGATGGTACAGTACTAGCTCCCATAGTCAAACATGGAGACTTTTACTGGTT
ATCTAAAAAATACCTAATTCCTTCGCACATTTCAAAGCTAACAATAAACAACGTCAACAA
AAGCAAAAGCGTAAATAAATATCCATATCCGTTAATACATCGAATGCTTGGACATGCTAA
CTTCCGAAGTATTCAGAAGTCTCTTAAGAAGAATGCAGTTACATATTTGAAAGAATCGGA
TATTGAATGGTCTAACGCTAGCACATATCAATGTCCTGACTGTCTAATCGGCAAAAGCAC
GAAACATAGGCATGTCAAAGGATCACGACTAAAGTACCAAGAATCATATGAGCCTTTTCA
GTACTTGCATACCGATATATTTGGTCCTGTACATCACTTACCGAAAAGTGCACCTTCTTA
CTTTATATCGTTTACAGATGAGAAAACCAGATTCCAATGGGTCTACCCATTACACGACCG
TCGTGAAGAATCTATACTCAATGTTTTTACATCGATATTAGCATTTATTAAGAACCAATT
CAATGCTCGCGTTCTAGTTATCCAGATGGATCGTGGCTCCGAGTACACTAACAAAACTCT
TCATAAGTTCTTTACGAACAGAGGTATTACTGCATGCTATACAACCACGGCAGATTCTAG
AGCACACGGTGTCGCTGAACGATTAAATCGTACTTTATTAAACGATTGTCGCACACTGCT
TCATTGCAGTGGTCTACCAAATCATCTATGGTTCTCAGCAGTCGAATTTTCTACTATAAT
CAGAAATTCATTAGTCTCACCAAAAAACGATAAATCTGCAAGACAACATGCAGGTTTAGC
TGGACTGGACATTACTACTATACTACCTTTCGGTCAACCGGTTATAGTTAACAACCATAA
TCCCGACTCGAAAATACATCCTCGTGGCATTCCAGGTTACGCCTTACATCCGTCACGAAA
CTCTTATGGCTATATTATCTATCTTCCATCATTAAAAAAGACAGTAGATACTACCAATTA
CGTTATATTACAAGACAACCAATCCAAATTGGACCAATTCAATTATGATACACTCACCTT
TGATGATGATCTCAATCGTTTAACAGCCCATAACCAATCTTTTATTGAACAAAATGAAAC
AGAGCAGTCATATGATCAAAATACAGAATCTGATCATGACTATCAATCGGAGATTGAAAT
AAACTCTGATCCTCTAGTGAACGACTTCTCGTCCCAATCAATGAACCCTTTACAATTAGA
CCACGAACCAGTCCAAAAAGTACGTGCACTAAAAGAAGTTGATGCCGACATATCTGAATA
CAATATTCTTCCATCTCCTGTACGATCTCGTACACCCCATATCATTAATAAAGAGAGTAC
CGAAATGGGTGGTACCATTGAATCAGATACTACTTCACCTAGACACTCGTCTACCTTCAC
TGCACGAAACCAAAAGCGACCTGGTAGTCCCAATGATATGATTGATTTGACCTCACAGGA
TAGAGTTAATTATGAACTTGAAAACATCAAAACTACCCGTTTGGGTGGTACGGAGGAACC
ATATATTCAACGAAATAGTGATACAAATATCAAATACAGGACTACAAATAGTACGCCCTC
AATAGATGACCGTTCGCCCGACAGTGACTCTACTACTCCCATCATCTCCATAGAAACAAA
GGCTGCATGCGATAATACACCCTCCATTGATACGGATCCGCCAGAATATCGATCTTCTGA
CCATGCGACTCCTAATATAATGCCTGACAAATCCTCAAAAAATGTTACGGCTGATTCTAT
TCTTGACGACCTCCCACTTCCTGACTTAACTAATAAATCTCCTACGGACACTTCTGATGT
TTCAAAAGATATTCCACACATACACTCTCGTCAGACTAATTCCAGTTTGGGTGGTATGGA
TGATTCTAATGTTCTGACTACTACCAAAAGTAAGAAAAGATCATTAGAAGATAATGAAAC
TGAAATTGAGGTATCCCGAGACACATGGAATAATAAGAATATGAGAAGTCTGGAACCACC
AAGATCGAAGAAACGTATAAATCTAATTGCAGCAATAAAAGGAGTAAAATCAATCAAACC
AGTTCGAACGACCTTAAGATATGATGAAGCAATTACATATAATGAAGACAACAAAGAAAA
AGACAGATATATTGAAGCTTATCATAAAGAAATTAACCAACTATTGAGAATGAACACTTG
GGATACAAACAAATATTATGATAGAAATGACATAGATCCTAAGAAAGTAATAAACTCAAT
GTTTATATTTAACAAAAAACGTGATGGTACACACAAAGCCAGATTTGTTGCAAGAGGCGA
CATTCAACACCCCGATACATATGATTCTGATATGCAATCCAATACCGTACATCACTATGC
ACTGATGACGTCATTGTCAATCGCATTAGACAATGACTATTATATCACACAGCTGGACAT
ATCCTCTGCTTACTTATATGCTGATATCAAAGAAGAATTATACATAAGACCTCCACCACA
TTTAGGTTTGAATGATAAGTTACTACGTTTGAGAAAATCACTCTATGGTTTGAAACAAAG
TGGTGCAAACTGGTATGAAACCATTAAATCATATTTAATAAATTGTTGCGACATGCAAGA
AGTTCGCGGATGGTCATGCGTATTTAAGAATAGTCAAGTAACAATTTGCTTATTCGTTGA
TGATATGATATTGTTCAGCAAAGACTTAAATGCAAATGAGAAAATCATAACAACACTCAA
GAAACAATACGATACAAAGATAATAAATCTGGGTGAAAGTGATAACGAAATTCAGTACGA
CATACTTGGATTAGAGATCAAATATCAAAGAAGCAAGTACATGAAATTAGGTATGGAAAA
ATCCTTGACAGAAAAATTACCCAAACTAAACGTACCTTTGAACCCAAAAGGAAAGAAACT
TAGCGCTCCAGGTCAACCAGGTCATTATATAGACCAGGATGAACTAGAAATAGATGAAGA
TGAATACAAAGAGAAAGTACATGAAATGCAAAAGTTGATTGGTCTAGCTTCTTATGTTGG
ATATAAATTTAGATTTGACTTACTATACTACATCAACACACTTGCTCAACATATACTATT
CCCCTCTAGGCAAGTTTTAGACATGACATATGAGTTAATACAATTCATGTGGGACACTAG
AGATAAACAATTAATATGGCACAAAAACAAACCTACCAAGCCAGATAATAAACTAGTCGC
AATAAGCGATGCTTCATATGGTAACCAACCATATTACAAGTCACAAATTGGTAACATTTT
CCTACTCAACGGAAAAGTGATTGGAGGAAAGTCGACAAAGGCTTCGTTAACATGCACTTC
AACTACAGAAGCAGAAATACACGCAGTCAGTGAAGCTATACCGCTATTGAATAACCTCAG
TCACCTTGTGCAAGAACTTAACAAGAAACCAATTATTAAAGGCTTACTTACTGATAGTAG
ATCAACGATCAGTATAATTAAGTCTACAAATGAAGAGAAATTTAGAAACAGATTTTTTGG
CACGAAGGCAATGAGACTTAGAGATGAAGTATCAGGTAATAATTTATACGTATACTACAT
CGAGACCAAGAAGAACATTGCTGATGTGATGACAAAACCTCTTCCGATAAAAACATTTAA
ACTATTAACAAACAAATGGATTCATTAGATCTATTACATTATGGGTGGTATGTTGGAATA
AAAATCAACTATCATCTACTAACTAGTATTTACGTTACTAGTATATTATCATATACGGTG
TTAGAAGATGACACAAATGATGAGAAATAGTCATCTAAATTAGTGGAAGCTGAAACGCAA
GGATTGATAATGTAATAGGATCAATGAATATTAACATATAAAATGATGATAATAATATTT
ATAGAATTGTGTAGAATTGCAGATCCCCTTTCATGGATTCCTAAATCCTTGAGGAGAACT
TCTAGTATATCTACATACCTAATATTATAGCCTTAATCACAATGGAATCCCAACAATTAC
ATCAAAATCCACATTCTCTACAATAATAGAATAATGAACGATAACACACACTATGAAAGA
AGAATAATAATAATAACACTGTATAGAAATAGCGGCTCCCTCTTGTTTATTCTCACATCC
TCGAGCAAAACTTCTAGCAAATCCTGTGTATTTAATATTATGGCCTCTATCAGCAATGGA
CTCCCAATAATTATCCAATTACTCACCAATTTTTCAATATTAGTGTAGATAGGAAAGGAT
CCTCGATGAAATCGTTATGGTTAGTGTCTCTGTTGATAATTAGAGGTTAAAAATTAGTAT
TAATGAAGAAGTGAGTACTGATCTTCTTATACTAAATAAGAGAGGTATATAAAACACACG
CCGATTGGTCATATTAATTATGACCAATATAATAGTGATTCCGGTAGTTACTATACATTG
ATGTGACGACTCATATTCCTCATATATGTACCTACCATAACATGTTCAACTAATAGGTCT
TTAACACAGCTTCAGTATTGTCTGAGCTTCTCGTTTAACATTCCTTCTGCAATAGGCGCA
ATCACACTTAAACGTATACGAGTTGTACATTAATATACGATGTAAGCATTAGATTGTTAC
CATAGCAACTCATGTCACTATTAATTACTCTCGTTCCAACAGTCTCGATCCACTGTGTGT
ATTCTTGGAAAATGAACAAATCAGTGTAGAGAAGTCGTCTTCGTTTCCATCATGAGAATG
TGCTTCAGTATTACATTTTTTGCCTTCAACGCCTTGATTGTTCTATTTTTGCTAATAATA
AATCTATTTCATCGGACTAAAAGTCCATTAGTTGTAAGCGGATTTAGCTCAGTTGGGAGA
GCGCCAGACTGAAGAAAAACTTCGGTCAAGTCATCTGGAGGTCCTGTGTTCGATCCACAG
AATTCGCATTCCTTTTTGCTAGCATTCTTTTTTTTTTCATTTCTAGGCCTGTTTCTCCGC
GCTGATTGGTCGCCCGGGTGATGCAGTTGCGGCCGGCCCTGGCCAATCAGATCCCTTTAA
AAATGGGCCCGGTGCGCTTCTACCCCTTCACGCCTTTTACGCCTTTTTCGAATCTTGTAT
TTATTGTAATTATTATACATTGGTCATATCAAATTCACATCAGACTTCAATTTTTCAATT
CACTTTCTGAATAAGAGCCCTTCCCTTCATACAAGTAGAGATATTATACTGTCATAGCTC
TTTCAATTGGTCTTATTAGATTGTCTCCATCTTTCCCATTGACGTTGTTACTCCCTCTCT
TTTTTCGTTTTTAACTGATTTCTCATATATTCCCAAACAGGCATATATACTCGACGTCAA
GAAAGAAAAGAAAAGAAAACCCTCATAAAAAATATAATCGAGAAGTTTTTTTCCTCATCG
CGAACCATTAGTATAACAGATTGATCGTTCAGCTCTCATAACTATCGCAAGAACAGTAAC
AAAATAAATAAAAAAAACACGCACATATAATAATGTTGGCTCGTACTGCTGCTATTCGTT
CTCTATCGAGAACTCTAATTAACTCTACCAAGGCCGCAAGACCTGCCGCTGCTGCTTTGG
CTTCCACCAGAAGATTGGCTTCCACCAAGGCACAACCCACAGAAGTTTCCTCCATCTTAG
AGGAAAGAATTAAGGGTGTGTCCGACGAGGCCAATTTGAACGAAACTGGTAGAGTTCTTG
CAGTCGGTGATGGTATTGCTCGTGTTTTTGGTTTGAACAACATTCAGGCTGAAGAATTGG
TCGAGTTCTCCTCTGGTGTTAAAGGTATGGCTTTGAACTTGGAGCCTGGTCAAGTCGGTA
TCGTTCTTTTCGGTTCCGATAGACTGGTTAAAGAAGGTGAATTGGTCAAGAGAACCGGTA
ATATTGTTGATGTCCCAGTCGGTCCAGGCCTTTTGGGTAGAGTTGTCGACGCTTTAGGTA
ACCCTATTGATGGTAAAGGTCCTATTGACGCTGCCGGTCGTTCAAGAGCTCAAGTCAAAG
CACCAGGTATTTTGCCAAGAAGATCTGTCCATGAACCAGTTCAAACCGGTTTGAAAGCCG
TTGACGCCTTGGTCCCTATCGGTAGAGGTCAAAGAGAGTTGATTATTGGTGATCGTCAAA
CAGGTAAGACTGCTGTCGCCTTAGACACCATCTTGAATCAAAAGAGATGGAATAACGGTA
GTGACGAATCCAAGAAACTTTACTGTGTTTACGTTGCCGTTGGACAAAAAAGATCTACCG
TTGCTCAATTGGTCCAAACTTTGGAACAACATGACGCCATGAAGTACTCTATTATTGTTG
CAGCTACTGCATCTGAAGCCGCTCCTCTACAATACTTGGCTCCATTTACTGCCGCATCCA
TTGGTGAATGGTTCAGAGATAATGGAAAGCACGCTTTGATCGTCTATGACGATTTGTCCA
AGCAAGCCGTGGCATACCGTCAATTATCTTTGTTGTTGAGACGTCCTCCTGGTCGTGAAG
CCTACCCTGGTGATGTCTTTTACTTGCATTCAAGATTGCTAGAAAGAGCCGCTAAGCTTT
CTGAAAAGGAAGGTTCTGGTTCTTTAACTGCTTTGCCTGTTATTGAAACCCAAGGTGGTG
ATGTCTCCGCTTATATTCCAACCAATGTTATTTCCATTACCGATGGTCAAATTTTCTTGG
AAGCTGAATTATTCTACAAGGGTATCAGACCTGCCATTAACGTTGGTTTGTCCGTTTCTC
GTGTCGGTTCCGCTGCTCAAGTTAAGGCTTTGAAGCAAGTCGCTGGTTCCTTGAAATTGT
TTTTGGCTCAATACAGAGAAGTCGCTGCTTTTGCTCAATTCGGTTCCGATTTAGATGCCT
CCACCAAGCAAACTTTGGTTAGAGGTGAAAGATTGACTCAATTGTTGAAGCAAAACCAAT
ATTCTCCTTTGGCTACAGAAGAACAGGTTCCATTGATTTATGCCGGTGTTAATGGTCATT
TGGATGGTATTGAACTATCAAGAATTGGTGAATTTGAGTCCTCCTTTTTGTCCTATCTAA
AATCCAATCACAATGAGCTTTTGACCGAAATTAGAGAAAAGGGTGAATTGTCTAAAGAAT
TGTTGGCATCTCTAAAGAGTGCTACTGAATCATTTGTTGCCACTTTTTAATGTGAACTAA
AAAAATAAAAATGAATATAAGGTACGTCTCAAAAAGAAATGTAAATATAGAAATTTTAAA
AAAAAAAACGAAAAAAAACATAACTAAATTTAAAGTGCAGCCAAACAATAACCCTGAAAA
ATCTAAATATCTTAGAATTTTTTTATTTTGATTATTATATATTATTATTATTCTTATGGT
AAATAATGCCCCTACTTTTCTTCTAAGGAAATGAGTTACTACAAAAATAAGGAAATATCG
CCTGCAAGCGGTTTTTATTTTGGAGTTGTTTTTTTTTTTCCCACAATAGCCTCTAGTTTA
TTCCATTCTTAGCACTGACTCTTTTTTCCGCCACTATTTCTTATAAAAGGCCCGAATTTC
TGGCACGGACGTTGTTTTTAATAATAAAATATTGAATGACAGTTAAAAAATCACGTAGTC
AGTTAATCTGTTTAACTTGAAAATATGTCTGAATCAGTGGCCATTATAGGTGCAGGATTA
GTAGGCTGCCTTGCAGCTTTGGCATTCTCCAAAGAAGGCTACAATGTCACACTATATGAT
TTTAGACAAGATCCTCGATTGGACACCACCAAAAATAAAAATTTGAAATCCATTAATTTG
GCTATTTCTGCTCGTGGCATTGATGCTCTGAAATCAATAGATCCGGATGCTTGTGAACAT
ATTCTGCAAGATATGATTCCCATGAAAGGCAGGATGATTCATGACTTGAAAGGCAGACAG
GAATCACAATTGTATGGCTTGCATGGAGAAGCTATTAATTCTATCAATAGATCTGTATTA
AATAATAGCCTTTTGGACGAATTAGAAAAATCTACAACAGAACTGAAGTTCGGTCACAAA
TTAGTCAAAATCGAATGGACAGATGATAAACAAATCTGTCATTTTGCCATTGGGGAAGAT
TTGAAAACCCCACATACTGAAAAGTATGATTTTGTCATAGGTTGTGACGGAGCATACTCT
GCGACGAGATCGCAAATGCAACGTAAAGTTGAGATGGATTTTTCACAAGAATATATGAAT
TTACGTTACATTGAACTTTACATCCCGCCTACTGAGGAATTCAAGCCAAACTATGGCGGA
AATTTTGCAATAGCTCCTGACCATTTGCACATTTGGCCTCGTCATAAATTCATGTTAATT
GCGCTCGCCAACAGTGACGGCTCGTTCACTTCAACCTTTTTCGGTTCTAAAGATCAAATA
TCAGATCTGATAACTTCCAAGTCACGTGTGAGGGAATTCTTAATCGAGAACTTTCCCGAT
ATTATTAATATTATGGATTTGGACGATGCTGTCAAAAGGTTTATCACTTATCCAAAGGAA
AGTCTTGTCTGTGTAAACTGTAAGCCATACGATGTACCAGGCGGAAAGGCCATCCTACTC
GGCGACGCTGCCCATGCAATGGTTCCATTTTACGGCCAAGGTATGAATTGCGGATTTGAA
GATGTGAGAATTCTTATGGCGCTATTGAAAAAGCATTCAGGAGATCGTTCAAGAGCCTTT
ACTGAGTACACTCAAACAAGACATAAGGACCTAGTTTCTATTACTGAGCTGGCAAAAAGG
AACTATAAAGAAATGTCACATGACGTTACATCCAAGCGGTTTTTATTAAGGAAAAAGCTA
GATGCTCTCTTTAGTATTATAATGAAGGATAAGTGGATACCTTTGTATACAATGATATCT
TTCAGATCCGATATCTCGTATTCTAGAGCTTTAGAAAGGGCTGGAAAGCAAACACGTATC
TTGAAATTCTTAGAATCTCTGACACTCGGTATGTTATCTATTGGCGGTTACAAGCTTTTC
AAATTTTTGACAAGAGAACGTTCCTGAAGCCAGTTTATTCTTGCCATCCGTGTACGCTAG
GAGAGGATTATTAAAATAAGTGATATATACATATATATATATATATATATATATATAATA
CACTAATTATTTTATGTGATGTTGATCACGCGAAACGGTAAACGGCTCTGTTCGCGCTTT
CTTTGTTTACATTTTAGTGAAGTATTGTCAAGATAATATCCATATGGTTGAACTTTTTAT
ATTGGCTAGTTAAATACTCTATTTATTGCACCAAAAAATCATCTTAGTGGACTTTTTGGA
GCAAAAAAAACCAGCAGGTAGTTATATAAGATGACTACACAACTAAGGTATGAAAATAAC
GATGACGATGAAAGAGTAGAATATAATCTCTTTACCAATAGATCCACCATGATGGCAAAT
TTTGAAGAATGGATCAAAATGGCTACAGATAATAAAATCAATTCCCGAAATAGTTGGAAT
TTCGCATTGATCGACTATTTTTATGACTTGGACGTTTTGAAAGATGGCGAGAATAACATC
AATTTTCAGAAAGCATCTGCAACCTTGGATGGGTGTATTAAGATTTACTCTTCGAGAGTT
GATTCAGTGACAACGGAAACAGGTAAGTTATTGAGCGGGTTGGCACAAAGAAAGACGAAT
GGGGCATCTAACGGAGATGACAGTAACGGGGGAAATGGTGAAGGGCTTGGAGGTGACAGT
GACGAAGCAAATATAGAGATTGATCCCTTAACTGGTATGCCTATATCTAATGATCCTGAT
GTGAATAACACTAGGCGGAGAGTGTACAACAGAGTTTTAGAAACAACATTGGTGGAGTTC
GAAACGATCAAGATGAAAGAGCTAGACCAGGAATTAATAATTGATCCATTATTCAAAAAG
GCCTTGGTTGATTTCGATGAAGGTGGCGCCAAGAGTTTATTGTTGAACACATTAAACATA
GACAACACTGCAAGAGTCATTTTCGATGCATCAATTAAGGATACACAAAACGTAGGGCAA
GGTAAACTTCAAAGGAAAGAAGAAGAATTAATTGAAAGAGATAGTTTAGTAGATGACGAA
AATGAACCTAGCCAGTCATTGATAAGTACTCGTAATGACTCAACCGTAAATGATTCCGTT
ATTAGTGCACCTTCCATGGAAGATGAGATTTTATCTCTTGGTATGGATTTTATAAAATTT
GATCAAATTGCGGTGTGTGAAATTTCAGGATCGATTGAGCAACTAAGGAACGTTGTCGAA
GATATTAATCAAGCGAAAGACTTTATCGAAAATGTTAACAACAGATTTGATAACTTCTTA
ACTGAAGAAGAATTGCAAGCAGCTGTCCCAGATAATGCAGAAGATGATAGCGATGGCTTT
GATATGGGCATGCAACAGGAGCTGTGCTATCCAGATGAAAATCATGACAATACATCACAT
GATGAACAAGATGATGATAATGTCAACAGTACCACAGGAAGTATATTCGAAAAAGATTTG
ATGGCATACTTTGACGAAAATCTAAATAGAAACTGGAGAGGGAGAGAACATTGGAAAGTA
CGAAATTTTAAGAAAGCAAACTTAGTGAATAAAGAATCCGACCTGTTGGAAGAAACGCGA
ACTACTATAGGAGATACTACTGACAAAAACACAACGGACGACAAATCGATGGATACGAAG
AAGAAGCATAAACAAAAAAAGGTTCTGGAAATTGATTTCTTCAAAACGGATGATAGTTTT
GAAGACAAAGTCTTTGCCTCAAAAGGAAGGACAAAGATTGACATGCCGATTAAGAACAGA
AAGAACGACACACATTATTTACTGCCGGATGACTTCCATTTTTCCACTGATAGAATAACA
AGATTGTTCATTAAACCGGGGCAGAAAATGAGTCTGTTCAGTCATAGGAAGCATACCAGA
GGCGACGTTAGTTCGGGGCTTTTTGAAAAAAGCACAGTTTCTGCCAACCATTCAAATAAC
GACATTCCTACTATTGCAGATGAGCACTTTTGGGCGGATAATTACGAAAGGAAAGAACAA
GAGGAAAAAGAAAAGGAGCAGTCTAAAGAGGTTGGTGATGTGGTGGGTGGAGCGCTCGAT
AATCCGTTTGAAGATGACATGGACGGTGTTGACTTCAACCAAGCTTTCGAAGGAACAGAT
GATAACGAGGAGGCCAGTGTGAAACTTGATTTACAGGATGACGAAGATCATAAGTTCCCC
ATTCGAGAAAATAAAGTTACTTATTCAAGAGTTTCGAAAAAAGTTGACGTAAGAAGATTA
AAGAAAAACGTATGGAGATCGATCAACAATTTGATACAAGAACATGACAGTAGGAAAAAT
AGAGAACAAAGCTCTAATGACAGTGAAACCCACACAGAAGATGAATCAACAAAGGAGCTC
AAGTTTTCTGATATCATTCAGGGTATAAGTAAAATGTATTCGGATGATACACTAAAGGAC
ATTTCAACAAGCTTTTGTTTTATATGCCTTCTACACTTAGCCAATGAGCATGGGTTGCAG
ATAACTCATACCGAAAACTATAATGACTTGATAGTGAATTATGAGGATCTAGCGACAACA
CAGGCAGCGTCATAGTTGATGATCTTTTTTTTTTTTTTTTTTTTTTTTTTTGTGCTGCAA
AGTTTCTTAAAGCCTTCGGGCTTACGAAATCCTTTATCGCCGAAAGGGGACCGCTTCGAA
AAGTGGATATAAAACAAGGTATTTATTTTTATAGACAATGACCAAATGACAGGATAGATC
GAGGGTGAGTTCCAATATGTCCAGAACTATTCCATTTCTATTTAAATTAGTCAACAGGGC
AGTAATTTTGCCTACGGCAGGTTTTACATTAGGAGTTGGTGCGTTTGTAAAGGCGTGGCC
CGATGATGCCGGTGTTCTATCATTGAATGATCCGCAAACGCCAGCGGAGTTGATTAGTGC
GACCAAGAGCCGCCAACCTATGGAGCTGCAGAGGGTTGACATCCTCGCTCAAATCGAGAA
AAGCGAGGTTTACAACAAGTTGGCCCAGGATGAGAAGATGCACCATGTCTTATTCAGTGA
GAAAATACCAAGCGGGCATAGGGAATATCATGTAGGACAAGGCCTCTTGTTCGGCAAGGG
GAAGCTTGAAATTGATCCTTTGGTGTTCCATGATGTGAATCACGGTGAATTAACCGTGAT
TTATCACTTAGGTGCTGAGTTAGGGAATCGAGACGGTAACGTCCATAAGGGCTTGTTGTC
ATTGTTGCTGGATGAAGCATTGTGCTATTGTGGCTTCCCTTTGTTGCCTAGTAAAAGAGG
TGTAACTGCAAGGCTGTCGCTAGAGTTTTTTGAGGACATTCCTGTAGATACTACGATTAT
ACTAAAAGCAAACGTCAAAGAGATTAAAGGCAGAAAGTGTATCATTGAGGGACACTTGGA
ACAGTTTCCGTTGGAAGTTTCTTCTCGAAATGGAACTAGAAGTTGGAACTTACCACATAT
TTGGGGTTTCAACCATAAGCAGGAGATGGCAAAAAAATTTGCCAAGGCCAATTGTATTCT
CGTTGAGCCTACTTGGTTCAAATATTTTAAATGGCTTGATATGTTTTGAAAAAGCATGCC
TGTCTCAAAATAGCCTATTCCGTGTTAATTAATATTCTATATTCAAAAAAGTTAAACATA
TATACTGCATGTACTTACCGCCGAAGCACAAACGTGCCACTTCCATGAACACTTGCTCTT
TATTTATAGTGGGGCTGATATGCGATGGCGTAAAGCTACTCCAGCCTCCTTCTTTTCATA
TCCTCATGACTGTCACTATGTGTTGGTGTAGCCATCGAACTTCCACTAGATTTGTTCTTC
CTTTTCTTACTATTGTTACCTGAATTTGAGCCGGATTGGCTTTTTCCTGTACCGTCTAGA
TCAAACGCCAAGTCGTCTATATCAAACGGCGCTTGGGCTCCCCCTTGGTTCTGGTTTGCG
AACTCGCTTGGATATGACCTTTCAAACTGCGATAGTACCGAAGAGCAAAGGTCCCAATCG
AAATTTGGAGGCTGAAACAATGCTATGTCTCTATTGCGCAGCTGTTCGCGCCATTGTTGC
TCTGACATGTTTTGACCCTGCTGAGGTGGTTGTATCATCATGTCTGGGTTATTTTGGAAA
AGAATATGTGCTATTTGACCACCTTTACCATTTTCTCTGGTCGGTATGGTGGAGAATTTA
CCTGAAAGATCTGCTATCTGGTTCTTGTAAGATTTTCTTAGCTTCACGGCTTTAGTGCCG
TCCAAATTTGTTCTTGCCACTTGCCTGGAGATGTCATCCAAGCCATACACCGATATCAAG
TCCTGTAGAGGATTTGGTTGTTGGTACGTATATGTAGTTTCCGGATCCACGTAATAGTAG
TATGAGGGGACTGTAGTTTCGTCCACTCTAGAAGCCATTATTATCGTATTCCTTTTTCGT
TCACTTACTATTGCTATTCGCACTCACTACAGATCTATATTTTATGTTCCACCCTGTTGT
CAGATCAGGAAAGGAATGAAGAGGCTCTATTTAAACCAAATACACCTCTTCGTTTCTCAA
TATTGTTGGGCTTTCCTTTTTTTTTTCCTTCCACGTCTATCTATTGTCTCTATCAAAATT
AGGAAAAAGAAATGAAGAACGATGAGCCAAACGAGGCTGAGACAATCATGCATCCGTACA
TTCTATGTATGTTTGGGTGTATCTTTCCAGATTCGGTTCTTTTTTTTTTTCAGTCCAATT
GAAAAAAAAAAGGAACAGGAACAACGGGTCGAAATTTGCCGTCACATTCAGAGCGAAGAG
CGACAGGGGAATTGGTGGGCTAACCACCTGTTGAGCCCAGCTAGCAGCTGTCGGTAAACC
GTCGTTGGGCGGGGCGCGACAATGCAGCCAGCGGAGGCATTGTATGGTTTCCGTCTGGAG
AGTGGGCTTAGCCGGCCTGGCACTCCTTCTCTAAGCAGAGTGAGAAGGGAATCTTTTTAC
TGGAGAAGAGTGTTTGAATCCAGCAGAAGGTAATACGCACCTTTCTCATCTATTTGCAGA
ATCGTTTTATTAAAATACTTTTAAAGAATTTAGATTTTGATAATTAGTTCATTCTCTTTT
ACAAAGATAATCACCAAACAGGGACAATACACTGAACGATAAAAGTATGTGACATATAGA
ATGCTAGAATGAATAGCCTAGACTGCATTGTTATGAGAGCAACGTTTGATATTTGTGGCG
ATTGGAACAAACATAGTACATGCCAAAATGAGATGAAATGTCCAATTTGAACTGATTAAC
ATACACGCGCAAGCTCGTATTTGTTTACTGGTACACCTAGAGTTAGCCGATCAAAGAGAC
AGTGGCAGATATATGGGAAAATTTTCTCCGGAAGATTGCATGCGAGAGTCTCATAACCAG
TCATTTCCCAAGATACAATTCTCGGAGCTGTTATACTAACAAACTTTTAATTTTCATTTT
TTTTTTTTTTTGATTAGATGGCCTCCTTACCTCACCCAAAGATTGTCAAGAAGCACACCA
AGAAGTTCAAGCGTCATCACTCTGACCGTTACCACAGAGTTGCTGAAAACTGGAGAAAGC
AAAAGGGTATTGACTCTGTTGTTAGAAGAAGATTCAGAGGTAACATCTCTCAACCAAAGA
TCGGTTACGGTTCTAACAAGAAGACCAAGTTTTTGTCACCATCTGGTCACAAGACTTTCT
TAGTCGCTAACGTTAAGGATTTGGAAACCTTGACCATGCACACCAAGACTTACGCCGCTG
AAATTGCTCACAACATCTCCGCTAAGAACAGAGTTGTCATTTTGGCTAGAGCTAAGGCTT
TGGGTATCAAGGTCACCAACCCAAAGGGTCGTTTGGCTTTGGAAGCTTAAATTAAATAAA
GATTTACAAAATAATAACCTTCATTTAATTTTAAATTTCAATAAAAAAATATCAAATCAA
ACATGACTTTTAAATCTACCATTAGATAATTGTATAAAGTGATTTATTGTTTTTTAATTT
TGTTTTCATTATCTATCAAAACTAGGGCATTCTTCCTCACTTTTAGTGATAAACTTTTGT
AAACTCAGTAGTATATCCAGCCGACGAGCAATGCGATAACGGTGATGATAAGCAATGCTC
TGGAACTCAGACTTTGCCCGTTACCTGCTGATGGCGCTCTTGCTGATTCTGCATCGTGGT
TTCCAGACGGTTTTCTTTTCGGTAACACGGAGTGAAATATTTTGATCTTCTTGAAGACTA
TGTCATCTTTGTACTGCTCTTCCAGATTAGGCCAATCGGACAACAGCTCGCCATCCTCCA
CGTTTTGGTAAGCTGCCGGGATAGGAAGTGTAACGATCAAGAATTTGTCTCGTTTTTGGT
CCATTTCATCGTCAGCGGTTGACTTGGGTAATCCAAGGAAAACAATTTGGACATTTACAC
TTTCATGAGCACCTATGATGGCCACATTGGGCCTCACACAATACTTTGTGGGAGCACTAG
TCCTCACTTTAAATATAACTCTCTTTTCACCATCGTTCTCGAGCTTTATATACTCTGTTG
ATTGTTTATTAAGGGGAGCTGAAGTATTACATATTAGTAACCTGTTGCATCGCACCAAAA
AAGGTAGCAAAGTTTCCCGCACACTAGCAATTCTCGTCAAACATACCCTTGAACACCAGC
TTTTCTGGCACTATTCTCATTGTTTACTCGTCTGAACTAGTGCTTATATTATCTGTCGTC
ATACCACTGTTTGAGACCCCCATAGGTCTTATATAAGGTAATGCATCATTCTAAACGGGC
GGCAAGCCATATTAAACTATCTATATAACTACAACAGTATTCATATACCTAGTGAGGAGG
CCATTTGAAAGCGCATTTTACCTCAGTAGTCATCACCTTTCGAAACGACTTCCTTTTTGT
GAGCATGCAACAAGATGGTGTGTTCGAATTGTGCAGTGTAGGATCCGGGGATATCGTTCA
ATGGTGGATAATCCTGTACTAAACCGTGTCTAACCAAGTTATTCAACGCAAATAAGTATT
TCTCTTGGCCAAGTCTGTCTAGGTATCGGCGACAGAACGGTAAAGTCCCAAAGTTGCGGT
CTATCGTTTTTAACAAGTTCTTGGCGCTGTCTAACGTGGGCATTACCTGATGGTCTTCAG
CAGATCTGGCATAATGAGAAACTTCCCCACCGGCAGTAACATAACCTCTACCAGTAGAAC
CAAAAGTTTCAATGGCAAAGTGCTCACCTTCCTCCATTTTTGTAGTGTCCCCATTTTTGA
CGATGGGAACGGATTTACCGCCGTGGATACGATATGGTGCGATACTGTGGCCACATAGAT
TACGACAAGGTTTAACCTGGTAAGTCTCACCATTGATTTCCACTTCGTAGGATTCCATAA
CTTCTTGGATGGCTTCACCGATGTCGGTTAATCTCACATCGATACCCGCTTCTTTAATAC
CCGTGTAAGTAGCGTCCTTTACAGCGGCTAGCAGGTTATCGTATTGTGGATCAAAGGAAA
CAGTAAAGGCAGAATCAATGATGTTACCGTTTACCTGCACACCATAATCTACCTTCATCA
CGTCTTCGTATTTCAGAACGGTTTTGTCGCCTGCATTGGGTGTGAAATGTGCAGCACAAT
GGTTGAGAGAGAGACCCGTTGGAAACCCAATACCTTGAGATTTGGGATCCTCCATCGCTA
ATAAATTTTCGGCACCTGTATACTTTCTTGTAGTATTTTCGATCATGTCAGCGATATCCA
TTAACTTCATCCCAGGAACGATTCTGTCCTTGATGGCCCTTCTCACACGACGATGTATCT
CAGCACCCTTTCTGACATCATTCCAATGTTCGGCCCTTTCCAGATCCCTTTTCAAATAAC
GTGATTCTTCATCCGTGGTTCTTTGCAGATTGAAATCTTGATGATAGTCCATCCACGCAC
CTTCTGGGTACTTTCCATCTGGAAACAGTAATTCAATCTTCTTCACATTGCTTTTCTTCT
TCTTCTTTTTCTTGTTCTTCTTCTTTTTGCTTTCTACTGGGTCTGACTCGTCAGCTTTTG
CCTGGTCTTGCTGTTCAACGCCTTCATTCTCCAAATTCAATTCTTTTAAATCAGAAGCAG
GGGAATTTTCTATTTCAGCGTCTGTCATTTTTCAATACGGTAGAGCTTCTACAGTACTTG
TTGATGTAAAAGCCCACTTATTAGCTTCTTGCTATGGCTTCCTTTCTTTTTTAAGTTCGC
TTCTTTCCCAAGATTGAAAATAAAAAATAAGTGAGACCAGGTCATTAAAGGTCCCTTGAA
GAGTAAAAAATCTGTCAAATATCACCCATAAGAGCATAACCATAATGTTGAAGAGCACGC
TGAGGCTTTCAAGAATCTCTCTCAGAAGAGGTTTCACAACGATCGACTGTTTACGCCAAC
AAAATTCGGATATCGATAAAATCATACTAAATCCAATCAAATTAGCTCAGGGAAGCAACA
GCGATCGTGGCCAAACCTCTAAAAGCAAAACTGATAATGCAGATATTTTATCAATGGAAA
TTCCAGTAGATATGATGCAATCTGCTGGGAGAATAAACAAGAGGGAGCTTCTATCCGAGG
CGGAAATTGCTAGAAGTAGCGTGGAGAATGCACAAATGAGATTCAATTCTGGAAAATCTA
TAATCGTGAATAAGAACAACCCTGCAGAATCATTTAAGAGATTAAACAGGATCATGTTTG
AGAACAATATTCCCGGAGATAAAAGAAGTCAACGGTTTTACATGAAGCCGGGGAAAGTGG
CTGAATTGAAGAGATCTCAAAGGCATAGGAAGGAATTCATGATGGGCTTCAAGAGGTTGA
TTGAAATTGTTAAAGATGCCAAGAGGAAAGGATACTAATCGTACCATCAACTCTTGAATA
TTGTGAAATTTTCGCCATTGATTTCCGTCTTTGTAAATAGGTAATGCGTAACTATTTAGT
TAAATTTTTGTATATTTTTTATTCTATGACTTCACTTATCCATTATTTCCATCGTCAAAA
AAAGGAAATAAATACTGTTGCTCGAACGAACAGCAAGATAAAGTGGAAACGAAAAGTAAG
CAGCTTCCTCAATATGCCGTCAAACGTACGTTCGGGAGTCTTAACTTTGCTCCATACAGC
ATGTGGAGCAGGCGTACTTGCAATGCCGTTTGCATTCAAGCCATTTGGGTTAATGCCTGG
TCTGATAACGCTAACATTTTGCGGAATATGTTCCTTATGTGGGCTGCTATTACAGACTCG
AATAGCGAAGTACGTACCTAAATCTGAGAACGCCTCGTTTGCTAAACTCACCCAACTAAT
CAATCCGTCAATAAGTGTAGTGTTCGATTTTGCCATTGCTGTTAAATGTTTTGGCGTTGG
TGTATCTTACTTAATTATTGTTGGTGACTTAGTGCCACAGATAGTGCAGTCAATTTTTTA
TCGTAACGATGATAACATGAGTGGTTCGCAAGAGCATCACATGTTCTTAGACAGGCGTTT
GTATATAACTCTGATCATAGTGTTTGTTATCTCCCCTTTATGCTTTAAAAGAAGTTTGAA
TTCTCTACGATATGCTTCTATGATTGCCATTGTTAGTGTCGCATATTTATCTGGTTTGAT
TATTTACCATTTTGTAAATCGGCATCAGCTAGAGAGAGGGCAAGTATATTTTATGGTACC
TCACGGAGATTCTCAGTCTCATTCTCCCCTGACTACATTGCCAATTTTTGTGTTTGCTTA
CACTTGTCACCACAATATGTTCAGTGTAATTAATGAGCAAGTGGATAAGAGCTTCAAGGT
AATCAGGAGGATTCCGATTTTTGCCATCGTGTTGGCCTATTTTTTATACATCATAATTGG
TGGTACAGGTTATATGACATTTGGTGAGAATATTGTAGGAAATATCCTCACTTTATACCC
GAATTCCATCTCCACCACCATCGGGAGGTTAGCAATGCTGCTATTAGTTATGTTAGCATT
TCCATTGCAATGCCATCCTTGCAGATCATCGGTAAAAAACATAATTATATTCATTGAAAA
TTTCAGAAAAGGTAAGTTATACGATAACAGAGCTAGCTTTATTCCATTAGACAACTTTAA
TAGTGAAGATCCGCAGGAGGCGCCAACCCAACAAAACAACGAAGAGCCAAATCTGCGTAG
TGAGTCTTTACGGCATATCAATATTATCACCCTTTGTATCTTACTGTTCTCATATCTACT
GGCTATTTCAATTACGTCTCTAGCAAAAGTCCTAGCAATAGTTGGTGCCACGGGATCTAC
GTCGATTTCTTTCATTTTGCCAGGCCTTTTTGGTTATAAATTAATTGGCTCAGAATTTAC
GGGCACGAATGAAAGAGTACCGACAAGCATAAAAATATTCAAATACTTAAGTTTATCTCT
ATTCATCTGGGGGATAGCAGTAATGGTAGCTTCACTATCAGCGATTGTATTTTTGGGCAC
ATCATCACATTGAGTTTGTACATTACTTTTCGTATTTCTATAAACAAAAAAAAGAAGTAT
AAAGCATCTGCATAGCAATTAATAAAAAGGTGACCATCCCATATATATAACACTCAAATT
TGATGGATCCGTGGCTTGCTGAATCAAATCTTGTACGCTAGACTCTACACTTAGTCCATT
ACCCATAAGCTTCTCTTCTACACCTTTAAGGGCCCTATAAGACTCTTGGTTTTCGTTCCT
GTCGTTGTTACTTATGAACTTGCTGACGTTATCGAAATTTGTAATTTCATGTTCTTCTTC
AAATAAGTGTTCGTATTTTTTAACTGGTGACATTACCCAGGAATAAAGGGGATCCCATTT
TAAGATATTCAAAACACACATCACCTTGACATAATCTTTTCTTAATACTGCGTAAACTCT
TTCACAACTCCGCCTGAATAGGCCATCCACGCCTGTGACTCCAAATCCATCAACGATATC
TCTAGTTAATCTGAAAGGGACCAACTCTGGAATGGGGAGTAATTTTCCCTGATCAAACGC
AATTCCCAGGTCTATATGAATAGGCTCCCCTGTTGAGCAGTCAAGCAGGATATTGTTTAA
GTGCCTATCACCGAGGCCTAATATGTATCCAACGATAGAGCTAGCTGCGACACCTTTTGT
GTACGTTTTCTTAGCTTCAAACCAATCCAACGGATCGGGAAAGGAATCAAAAAAAAAGTT
TCTTAACTGCGGTTTTATTTCATTAGTGATTTTTAAATAAGCTTTCAGCCTCTCTTCATT
TGATTTTGTTTGAACTGCTTTCATGCCTTTTCTTGCCTGATCGAAGGTTATCTTATCGTT
GGTATGTAGCTTACTCAAAATTTGATGTAATGATGTAGAATTTGCGACAAATTCAATGAT
TCCTGCCTTTGGTCCTAATGGAACCACTTTGTATGTTCTAATACCCAGATCTAGATTTCT
TAATACTTTATCATTTTGTAGAACTTTATTAACTTGTTGAAACACTTGTTCCATAATTGC
ATCTTGTCTCAAATCGTCATTACTTCCTTTCATCAAAGCTTTCTGCGTTGTACCATCTGA
GATGTTGAAGGTGACTATTTTCGGCAGGGACAATCCTGTGGTAGTAATGCCTACTGTTTC
ATTGACGGATACAATATAAGGGCGGGCTTTTCTTCCATCAGCAGAACTTTTGACTGTAAA
ATTACTGGTCGGTAGGGGAAGCTTCTCCATGTTTAGCTGTTTCAGCCAATATTGGCCAAT
CTTCAAATTAGCTAAGCGTAACGTCTTCGTATTTTGCACAAACTTAAGATTAGCTAACTC
TACAGACATCTCGCAAAACTCTTGCACAGGAAGTAAATACTTTTTCGCAAAGGCACCCCT
GTCATATCCTTGCAATTCTAAAAGAATCTTTTTGACAGCTTGAATTTTTTGGGATATGTT
GGTGTCCTTATTGGATTGCTTTTCATATAGTAGTATGCTCATCACTGAATAAAGGGAGTC
ATACGGTAGTTTGTAAAGAAGTCGTTTCATGGTTAGTTGCAATGGCTTTTGAAATTCATT
CTCCTCCATAGATATTTTTGACGCAATCTGATTGACCCAGGGCAAAAACTTCCAGCTCGG
TATTGTTCCAATTTCTTTATATAGTAATTGATTGATCTTGCTATTGTCATCATTCTCGAA
CCATAAACCACAAAACTTATCAATAATGTCATTATCATATCTGTTGCTGAAAACTAAGGT
ATTGAGATAGAAATGGAGTGCATGCCATAAAAATTTTTCTTTTTGAAGAAGCAGTGCCTT
TAGTACTTCAGAATCTCTATTATATTGTAGCAAGACACGATTATAATGCCTTTTCGCATC
TTTTCTTTCATTTTCTGGTAATTTTGTGTTTTTATATATCAGCTCCAAAGCTTTCAAGGT
AGATTTTCCAGTATATGACCTATGTTCTCTATCTTCGATTTCTCCATTTGATCGTAACTT
TTGTGCCTGTTCATCCAGAAAACTTCCGAGTGTGTAGAAAACATCAGAACATGATTCATG
ATCTTCGACATTTATATCCCAATTGACAATGATTTTTTCATATATTGCAGCAGCTGGTTC
AAGCCTTGATTCTGAGCTCCATTTAACTAGTCGAGCTTTAATTTGGTCCATAGGCACATT
AATGAGTAGCTTAAAATCGTCATAAAGGATACTTTCGCTAATATTCTTCTCATTTTGAGC
TAAAAGATCTCTCATTATCATTACAGGTGCCTTGTACTCTCGAGACTCCCAGAGGGCATT
AGCAGATGTGAAACTTGCCAATTTCTCAATTTGAGATACTACAGAGGGATCATCGTATAA
TTTTGCAATATTCTTCACTGTTTTGCTCATTAGAGTGGCATTTCGTAACGCATCTTGAGG
CGCACCATTGGCAATTGCCAGCTGAACGTAATTAGCAAGCTGAATAATGGATCCAAGGCG
TAAATATTTCGAGCATTTTACGTTTTCATCTAATGAATTCCTCGAGAGCACATTCATTAA
AGTATGTCTACTCTTTAACGTTGTTTTGTGATCATAGAAGTCTATTGTATTAAGTCTCTC
CTTATCGGCCTTCATAATAGACATCAATGTTTGGGGGAAGGAAGTAACGTCCTGAGGGAT
TGCTGCTATTTTTATAAATTCAATAATCGCGTTCAGAGTATCCATCCATTCAGTTTGGCT
AATAAAATGTTGTCGAGAATCAAAAATAGTTAATAAGGATTTTTCTAAACTTTTTTCAGC
AAAACCAACGTCCTGTGGTAAATTTTTTATGGCATAGTATAAACCTTTGGCTTTGGAATC
AACAACTTTTGGAGTCAATAGCTTCCAGTCTCCCAATTCTAAATTCCATTTGTAGACATC
ACTGGATCCAGAAAGTCTACTTTCCAATAAGCTTGTCAACCCGTAGAAACCGCTATCTTC
TGTGGCCTTGATTAATGATTCCTTTTCCTCTTCTAGTGAAGTAGTGTAATTGGCATCAAA
ATCGGCGTTGTTGAAAAGAAAACGTTTCCACGTATCTGAGTCAATTCTATTGATAGAGTT
CAAAACACCCTCTATTGAGTGTGGAACAGGTAAGCCTGCTAGAAAATCGCCGTCATTTAT
GCATTCGTAAATCTTCTGAAGTGTATTTATATTCATTTCTCTTATGTTTGGCATGTTCAT
TTCCTCAAATAACAAATAGCCAAACTTGAACTCTTTTATTTTAAGAGAAATTTGACATAT
TTCTTGTAAATCTAAGCTAGAATATATGCGCAGACAGTTTCGTTCCTTGCATCTAGAACC
CATCCTAATCATTTTAATTACATTGAAAAGCATCTTTAGCTTTATCTCAGAATCTTTAAC
ATGCAGCAACATTGCTATTTGAGTGAATATTCGATTGCTCCAATTCAAACAGCTTTTCGG
ATCGTAAGTCGTTGAAAGAAAAAAGAGGTCAGTAAGTACTAATTCACAAAAAGCTGTTGA
TCCTTTGCATAAAGGATACAAGCAAACAATAGGAGGTATATTAAATGATATTTGGTGAAT
CAAACTACGGGCGAATTTGCTTAGCCAGCAGTTGTAGGGTTCGTTCACTGACAAATAAGT
ATCGCATATGAATGATTCCATCCCAAAATTGTTTGCCAACGGGTATATAGCATTCAGTAC
ATCCTTGTCCAATGGAGCAACTTTATCTTTGTTCTCGTTCATTATGTTATCCCTAAAACA
AAATTCACTTTCGCTATTTCCTATTGAGTAGCCCACTAGGTACGTTAGAATGCACTCAGA
AATAAAAAACACTTCAGTAGAATCATATAACTCAGCTTCTTTATTGAAGGTCGAAATACG
TTGGTATATCATATGTGGTTGTTCGGGATGGCGAAATACCATTTCAAAGTTTTTCAAATG
AACTTCATTATTAAAGTTTGTAGATCTCTCTCTTTGAACTTCTTGCTGTAAAATTCTTCT
TGAAAGAGCAGCGAACCATAGTTTGAAGTTTTTACTCAAATATTCCTTTGGAACATGGTG
TTTCAAAATGTTAATTGCAGCAGCTTTAGAAAGCGAACAACCGATTTTTGAAGCTACCGG
TCTCCTGGCATAAGAAAAGAGTAAAGAAACCAATACAACATCGTCTACGCCACAATCACT
AGCATCCAAAAGTTCCGTATTTTCATAAATATCATCTTGGACTATATTTCCGAATATTGC
ATCAAGGCAGTATTTCCAAGTTTTTATTTTGATGAGATCCCGATGCTCTAAAAGCTTTAT
AGCCTGCTGGAAGGATGGACTGAGCTGTTTGTTTTCCCTCAAATAAATGAATATTTTGCA
AAATAAATTGGGCAGAGATGGCTCTATTTCAAACGTATTTTTGTCAGCCAGATTTAACAA
TGAGCTGAAAATTGTTATTACTTCATCGTGAATTTGTGTATCTATTAAGAATTTTGAAAG
CCGAATTATGATGAAGTTTAAAGTTGATGATTTTACAAGTACATTCTCATACAACACAAA
AAGATATTTTAACTCCCTTGCACATCGCAGTTTTCCTATGTAAGTCGATGTCTTTTCAAG
GTCTGTAATAACCGATAAAAACAAAAGCTTGAATTCGTGTGTGTTGTTCTTTTCATGAGC
AAACTGCGTCTGAACTAAGGTTGCTCCTAATGCCAAGGGTATATGAAGTGGGTATTGATA
CCTCATTGAAACACTGGAATTTTCAAATAAATATGGCGAAAGGTATGAAGTTGGGAATAA
TTTTTCAACAGTAGATCTAAGTTCAGTAAGTGAGCCCAAATCAGTAAATCTTATGATCCA
CTTTAACATCAGTAGACGGTATTTTTTATGGTATTTTACTGTTGTTTTACCTGATATTTG
GGGCAATATATCAAATATTAGTTCATTCACACCGCCACTGATAAAGGCAAGTGGAATACA
CAAGTAATAGCTGTTATCCACCAGATAAGCATCACCGTTTCCAGTAATCGCGTGTAACAT
GTCTAAGATCCATTTTTGGTTGAAACCTTGAGAAAAGTAGATTGCAGAAATTTCTACAAA
GTATCTTCCTAAAAATTCATGAATATCGGCAAATCCAAAAAGAGATATATCCCATTCTTT
CTCCAATTTAGAAGTAGGGACTTTTGTTCTGTTAAACCAGTACATAATCAAATCAAACTT
ACAATATTCGAAGAGCTCTGTAAGGTTTTGGTAGCGAAAAGCGACCGTAATTTTGTTCAG
AGCTTGTTGGATAAACGCACGAGTATGATTGAAGCCAGAGTATGTCATCATATCCTCCAA
AGAAAAAACTAAGCTTGGGTAAGACACCAAAGACAACATGGACATTGCAAGAGAGTAGAA
AGCGGACTTTTCAATACTTTGCTGAGGCGGACCAAATAAGCTCTTAATCTCATAAAATAT
GATACTTTGATTCTTATAGCTCACTTGGGCCATATAACTCGAAATACTGTTCATTATGTT
AATAATATTGGAGGAGTCTAGCTTTTGCAGGCATTTAATAAAAGTTGCAAAGACTCTCTG
CTTCCCACCTCTGATTGATCCGTGGGAAAGATCATGATTTTGAAGTAGGCTAAGCAGCAG
CATAGAAAGGTTGACCGTAGGGGCCACACCAGTGAAAGAATTGTCCTCAAATCTAGATAT
GATCCAGTCCAGGATATCATTGCAGTCCGAATTCAAAGGCTGCTCGGGGTAAGATAACCA
TTGAGGTCTTATTGCTTCGATATAAGATGTAAGTAAAAGCATAGCTTGATTGGAAGAACT
ATAGTGGTTGCAAAGCAATTTTTCACCCAAGACTTCAGTGAATTCTTCCAGGATTTTGTT
GTAAGAAGATTTCTCCCCGATTGCTTGTTTTAACCACTGGCAAACAGTGCCAAGATAAGA
TATAAATACATCTGTGCTAACGCAATCAGAAAATTCCAATATGGCTACCAAACGCTCTGA
AATGGATTTATTTCTTGAAGACCATAGGTAAGCTCGCACTGCTTTATCTATAGTGGAGTG
CAGAGGCTTCTGAAATCTACCTCCAATTGTGTACGGACTATTATTCTGGGTAGTGTCTTC
TGAAGAGGCTTCGAAGTAATTGATGGCAGAAGTTCCTGTTTGAGATTTGTTTTTTTGCAT
CCTGATAAAATCATTAACGATTTCCTTCATATTAATTTTGTCAAGCACTAAATGGTCTAC
ATTTATGGTCCGTATCGATAAAACCTCCTCAAAAAATGATTGGTAGGAGTTTTGGCTATC
AAAACTAAGTTGTGGAATAGTTATTAAGGTTGTTCTCTTATATGCTGCAATAAACTCAGA
AAAAGTGGAATCTCCACAAAGATTATCAACTATTTGTATTAATTTTGCTACCCAAGTAAA
TTTTTGTAGTGGAGATGAAAATGCATCACTTTCAATATTTTCCAGTAATCTGTAAAGAAT
TTCATTATAACGTGTGAGGTCTAAGGAAACTTTTGGTAAATTAAAAAAGGGAGTGTTAAA
ACATTCTGACTTTTCTTCTGGTTTTACGCCTAAAAGAAATTCCCTCTGCTCTTGAAAATG
TTGCCAAATCTTGTGGCTTTCATCCCAACATAGTGAGACAGGATTAGCTCCTTCGCCTTT
TTTATCGTTGAAAGGGTTCTCTGGGTCATATTTGTTACCTAACCAGGATATAAAATTGCA
GAACTGATCCTGTTTAGCATCAGTTCCGCGCAACTGGTTCCACTTTGATTTTAGCCACTC
AAAAATTCTATCAGCGGACGATATACCGTTCATAGATTGGAAGTCTTTACCAACGTACTG
AAGGTATCCCCATAGCATGAACGATTCATTAGTAACTAATATGGGACCCAAAATATCGGA
TAATTCGTAAAGATCATATATCTGATTGATAGTTTTCTCATCGGATAAAAGCTGCTTTGA
AAACTTTATGGAGTTGGCTAATAAAAGACAACTTAACTGGCAAGATTCATTTGATTTTAC
TAATGGTAAGCAAACTTTAAATAGGCGTGCCATGTCGCCATTGCTTAATTCGCATTCTTT
TTGGGATAATAAAGGAATAAAAGAAAAACAAACCCAATTAAAGCATTGGATTTTTTCGAA
TTTTGAAAACAGAAGTTCTTTCAGCTGTTCTGCAAAACTTTTAGTGAAGTCTTGTAAAGT
TCCATAAAATGAGCACAATTGTAATCCTAGCACTTCAAACTCATGTGAGCTGTTCTCCTC
TAAAAGATGAATAAGAAATGTGTCCATATCGTCAGAAATCCGTAGGATAGAAGGTATATC
CGAATCACATTTTCTTCTTTTAAATAATAATGAGTAATTTTCATTTTTTCTGTTCAATGC
AAAATATGTTAACAATGATTTGGTAATTCCGAGTATTTTTAACCACACCGATCTGCCTCC
CCTATCTCTAAGTCTAAAATCAGGTAATGCAAACCATGAATTTTTATCCCTTGAACCTCG
AATATATGAGAATTCCACATGGTTTACGGTAAATAATTGAGGCTTATAATTACTTAAGCG
CAGTAGAATGTACTCACGGTATAGAGATACAAGAGATTCGGACCGAAGCTCTTCAACATA
ATTCTCTTGACCAATCATATAAGGAAGTTTATGGTTCATTAGTTCACTTGACATAACATC
AAACAGTGATAATTGGTCTTGTACTAGCTCATTGGAAGTACAGCCAATTGTCAGGTTGTA
ACTCCATGCTTCTTTTATAAGCATTAGCGTATCAATAACACTAAAACAATGGCACTTCAA
AATTAATTGATTTATTAATGACATTATTAATCTCGTATTTCCATTTTCTTTTTTGCTGAG
CCTCAAAAAATCTATTACGGTCCAAGTAATTGTCCTTGTCACTTGAAATATACCAACTGT
GTCTAACGCCAATAAATTCAGGAGGATCGATATGAAATTGGTCAATGTTTTGTCTACCAT
AGATAATTTCATTTGGCTTTGAAAGTACTCGCAAATTTTATCGACTAAGGATATCCATTG
GTGTATCATGAATTTCAGTTTGAAAGGGTCACTTTTAATTAGGGCATCCAAAGCAAACGA
TAAATGTACTGAAACGGCATCCAATAAACTTTTGGAACCATCTTTGACCATTAATTCAGG
TACTACTGCTAAAAGTAACTTCAACGTTTTCACTTTAAATCTCTCACATGATTTTTCTAC
AAATAATCTTAAAACGTACGATATCGTGGAGAGTCTGTTCTCACTAAGTGATAGCTTGTT
TGTGGTTGACACTGTCAAGTTTCGAAGAAGGTCACAGTATTTTGTGTGTTCAGATGCAAG
TAACTCTACCAAAGCTTCTGCCGTTGTAGATAGGGCCTTGGTTGGTATCCTTTCCGGATC
TTCTTTTAAAATTGTTGTTAGCTCATCTAAAGCATTGTTTCTCTCTTTGATTTTTGTTGA
TGATAGAAAGTTTAAAGTTTCTACAATCCCATGATCCTCCATCGTCTATGTTACACTGAT
TTCCCTTTTTCTTTGAAGGCTTTTTTTTCGAATTTCCTGCTTTTTTTGCGAGGCTTTGAG
AAGTCAATTAGTCTTGATTATTCTATTAACTTGGAACTAATTTACCTTGAAAAATGTCAA
AATATGCATATTGTACGGCTGGTGCCATACTTGTTTCTCACTAGCAAAACATTCTATCAT
CTGTTATTCTTACCTTCTTAACGTGTCTGTTTGCTTTTTTGACGTACCCCAAAAAATATA
TAGACCCTCCTATCACGCTCATAATATCATGTGATTCTCTCGATGAACGATAATAGTAAT
ATTTTCATCTAAAAATGCAATGAATTATTGAGTTTCTTTAATCTGTTTAAGAGATTGTTA
TTTATAAAGAAAATATATATAATTGAAGAATCTAAGAGTATGAGTCAAAATAATTTCCTT
TTTACACAACAACACCGGAGTTAGATGCAACTCTTGGCCATAAATCGGCACATTCCTTAC
CGACTGGACCAGTGATGGCGGAACCCTTCATTTCACCCTTAGGATTAGCGATGACACCAG
CATTGTCTTCGAAGTACAAAAAGACACCGTCTCTTCTTCTCCAAGACTTAGCTTGACGGA
CAACAATAGCTGGCATAACCTTCTTTCTCAATTCTGGCTTACCCTTCTTAACGGTGGCCA
TAACCATATCACCTAGAGAGGCGGCTGGCAATCTGTTCAATCTGGAACCAGAGCCTTTGA
CGGCGATAATGTACAAGTTTCTGGCACCACTGTTGTCAGCACAGTTCATGATGGCACCGA
CTGGTAGACCTAACTAGTTAAAAAAGATCTCAATATCGGGGAGTGAGAATAATTTTGTTA
GTAAAAGCATAGGGAGAAAGTTAGCAGATGTGGTTAATCTTGAAAAATAGAGTTAAGCGT
GATTTTTGTAGAAATAACATTTCGATGGTTATCCATTAGTATGGGCAAAAGAGGGAGTTA
GGATATGCTTGCCGTGTATGATTTTGAAACCAGAAATTTTTGAGTCCATGAATATTGACA
GGTATCACTTCATCTGCAAATACAGCCCGCTTAACCATTTAAAAACTGAATTTATGTGTG
TAATTGCATCTTTGGCGGGGCGGTACCAGTGATGGCACATCTACCATTCTTATGGAAAAT
AACACCGATAGGTATATGATCAGGCTTCACACTTAGTGTTTAGCGTCTTTTAAACCTCTG
TTTAATTCTGTTGTACCCAGCAAAATGAAATCTTGGAACTTTACTTTATGATCAATTTAA
CCAAATTGCATTGTGGAAAATAAAAATTTTAACATACTGAGATTCTAAACTTAGTACCTT
GAGCACCGTTACCGGACATTATTAGTTATATATAGGTGTGTTGGTTTTGTATTGCTTGTA
AGACCTAAGAGTCAAAATAAAGAAAGTAAGAGATTTTTAGCTACTAACCTTAGCAATACG
ATGGTATTACTATTAGCGGGAACAGGTACATTATGGCTACAGTTCGTTTCCTGCCATATT
AATTTTTCAGCCCGAGCGTGTTTGGGTTTGATATTTTCTTTTTTACCTCTTTTTCAACAT
TTCCATGCAAGTCTGATGACGGTTGTACGGCTCGTTCTGTGAGCCGGATAAGCGATAAAA
AAACTTGGTCTGTTGAAAATAATAACTGCATGGGTTTTTCAAAGCAGTTGGGGGTGTACA
GATGTTAATGTAGTCTGATATATGCTCTGTCTTGTCTTTTTATCTGGGGGATCATTAACA
TGGTAATAGTGATTGGTATTGCAAGCTTAAGATTATAATTACATAAAACAATACAAATAT
TCTAGCCCGATGGGGTTATTATAGACCAGTTTTTGTTTTCTCTTATTCTATCTGTTAAAA
AGTCCGTGGGGTTATTGTCTTCGACAGAGTTATTATCCTTGTCGCTCCCTTTATCATTAG
CCGTATTTTCGTTATCCTCGTCATTATGAGTCCTCAGTTTTGCACGTTGTGCTCGTGACA
TATGACTCCAATTCTGCTTTTTCTCCAAATACTCTCTTTTGCCCATTGTGCTGTAGCCGT
CATCGCTTGGATTTGGAGGCCAACTACTTGCCTTGTTCCCAAGGTTATTGCCATAATTTG
GATTGTAGTACTCTTCTTCCATTTCGTTCAATCTCAATGCCTGTAAATCGATTAAATTTA
TGCCCTTCTCGTTCTTAGCCCAACCGTTTCCGCCTTGTAAAATATCTTCCACGCATTCTC
TTGGCGTAAATTCACCTGGTCGAGGATCCCACGGTAATTTAAACGTTTTCTGGTACAAGC
TCTCAATCAGTGGGCTCATAGAGGAAGATATTGTTGTTGACAGCCCTGGCTTTGTTGTCA
TTTCGCTACTCTTGTGGTTGGTAGAAGTCGGTGATTTAATACTTGTGCTGTTTCCTGTCG
CATTTGTACCGGGTTTCGCTACAGTTGTTCCAATACCGTTAAAATTGGAGAATGTATTCT
TGGGTGACATCTGGTTTGTTGTTGATGTGGGGCTAGATAGTTCAGACGTGTTATCCAGTA
TAGTATTTATTCCTGGCCTGTAATTAGCGAGCTGGCCATTAGTAAACGATTTGGAAATGT
TGAAATCTTCGTAAGAGCCTCTAACTAGCTTCAACTGCAATGAGACGTTGATTATAGAAT
TGACCTTTGAGTGCTTTAGGAGAAATCTGTTTGTTGTGGGAGTTTCGTCTTCTTTGACGT
ATTCTGTTATATCTATGTCTACTGTTCCCAATAGAAGTTTACCCGTTATCTTTTGAGAAT
ATGAATTGTTTCCTGTGGCCGTTAGTGCAGTGGCGTTAGCATAGGTCGTTTTCTTCACTT
TGCCATTGGGACTAGAACTAGAAGTCAACGAGGAATTCGCATCAGCAAACTCAAAAAAAA
CATCCAACACCAAAATTTTCTTCAAGAATCTGCCGTTTTTATCCAAGTGGAGCTTCACCA
GGATTGGTTTGTCTAATGAATAATTCCATTGTGCTCTATGATGTTGCACATGCACGTGTT
TTGTTGTACCTCTACTCTGGGTCGAAGTGGTTTGATGCTCACCGTCCAGAGCCACTTTGT
GTCCCGACGTACCTGTTCCATCCTTCAAACGCCATTTCGTGTAGCAATAGCCAGAAGATT
GAGGAATATTTACCAATTCTTTGATTTGCAGGTCCAGTAGAAACTTTGGTCTTTTTGCCT
TGCTATTATGATTAAATGGCATCTTAATATTTTGTGAGCGGTATTATACCTTTCTTGGGT
ACCTAATACTTCTAAGCAACCTGAATGAAATTAGAAGGTGTTCACTCCTTCATTAGCAAG
TGAGCTTTGCCGTTGTCACCGTACTTGGTCATCTTAAGAGATACAAAGGGGGGGGACCCT
GAGAAAACTTCTCCCGAAAAAAAAAAAAGAAATATACCCACGCGTTCTTTACCCGGAAAT
AAATATCTTGATTTAGCCGCCGAGATTGTTATATATGCATCCAAGACCTCTGAATGGTGG
CTAATTAAGACACTTAACTGATTACGTTTCCATCAACTGCTATCATGTTCGCAATATTTG
GGCAAGAAATGAAAAAGAAAAGTTACCAACTCTTCTCCCTTCTACGAGCGGTGAATACAT
GGGAGCCGAGCCGCATGAAGATGAAAGTAATATTAAAATTAAAGTCTCTATCGAAGCAGT
GACTCTCTCCCTATCAGCCGGTAAATTTTTTTAACGAAGTGGAGCTAAATTATCAGAAAA
CGTAGAGCTGGTATGCTGGTAGATCTAAACGAAGTCCAGTTTACATCAAGATGATATCGT
GCAATATTTACTACGGCATGACTTAACAGTACAGTCATGATTTAGGAATTTGAGTGTTCT
CCGGGGTTTTGCAGATAAAAATTTGTTTTCTTCTCTGCCATTCCTGGAGATTTTGAAAAG
AGTTGGTAATGTGTTTCAAAAGAAAAAAATACATTCCAAGAATAAATACCAGGATTTCGT
GACAAAAATTAAAAAAAAGGGAAGTATGGCATGCCTAGAAATCTTTTCTGGAAAACTTGA
AGCATATCATATAATTGTATGAACTTGTCCTTCAAAAGATGTTACCAAATATTCAAGAGT
ATGTGAGCTTTCTATTCTATTGACGCGTAAGAAAGGCTATCACGTGTGGGGGGGAGAGCT
CAGCCACATTGCACTACTTTCGAAACCGCGTAGTCGGAAACGACATTCCCCCGTACCAAA
ACAAACGAAAGGACGTGAAAGGTAAATGAATAACATGGCACTAAAAATTTGGCAGAAAAC
GAAAAAAAAAAGGAAAAAGAAACTGAAAACTATACGCTTCCCTTAGGATACTTTCTGATT
TACATCCGAAGAATTGGGTGCGTCAATTAAAGGCAATTCTTCGCTCTATCAAGCAGTTTT
ACTGCGTCTGTCTAAAGAAACAATTGTTTTACTGAATTTCAACAAAGTTCTAACTCGAGG
TGACCGGAGGCCACTGTAATAATAAAAAATAGAAGATGAGTCTCGAAGGAAATACCCTAG
GCAAAGGGGCCAAATCTTTTCCTCTGTATATTGCGGTAAATCAGTACTCTAAACGAATGG
AGGACGAGCTCAATATGAAACCAGGTGATAAAATTAAAGTCATTACTGATGATGGGGAGT
ACAATGACGGCTGGTATTATGGGCGCAATTTGAGAACCAAAGAGGAAGGTTTATACCCAG
CGGTATTTACCAAAAGAATAGCAATAGAAAAACCAGAGAACCTGCACAAATCACCAACCC
AAGAGAGTGGAAATTCTGGTGTTAAATATGGAAATTTAAATGATTCTGCGAGTAACATAG
GTAAAGTCTCCTCGCATCAACAGGAGAACAGATATACATCATTGAAAAGTACAATGAGCG
ATATAGACAAAGCCTTGGAAGAGCTAAGAAGTGGTTCAGTTGAACAAGAGGTATCAAAAT
CGCCCACACGCGTGCCCGAAGTTAGCACTCCACAGTTGCAAGATGAACAGACTTTGATTC
AAGAAAAAACCAGAAATGAGGAAAACACGACACATGACTCGTTATTTTCTAGCACAGCGG
ATTTAAACTTAAGTTCTGAATCTTTGAAGAATATAAGTAAGTCAAATATATCAACAAAAT
CCCTAGAACCGAGTTCGGAATCAGTTCGTCAATTAGATTTGAAAATGGCTAAAAGTTGGA
GCCCAGAAGAGGTTACTGATTACTTTAGCTTGGTTGGATTTGATCAATCCACTTGCAATA
AATTCAAAGAGCATCAAGTCTCCGGAAAAATACTACTGGAATTAGAACTGGAACACCTAA
AAGAATTGGAAATAAATTCTTTTGGTATAAGATTTCAGATATTCAAAGAAATAAGGAACA
TCAAGTCTGCAATTGATTCGTCGTCAAATAAACTGGACGCCGACTACTCTACCTTTGCTT
TTGAAAACCAAGCTGCCCAACTAATGCCTGCAGCCACTGTAAATAGAGACGAAATCCAAC
AACAAATTTCCTCCAAGTGTAACAAGTTGTCAAGTGAAAGCTCTGATAGAAAATCATCTT
CGGTCACCACAGAATTGCAAAGACCAAGCTCGGTTGTTGTTAATCCCAATTTTAAACTTC
ACGACCCAGCTGAGCAGATCCTAGATATGACAGAAGTTCCTAATTTGTTTGCTGATAAAG
ATATTTTCGAATCACCGGGAAGGGCTCCAAAACCACCATCATATCCAAGTCCAGTTCAAC
CTCCACAATCGCCCTCTTTTAATAACAGGTACACAAATAATAACGCAAGGTTTCCTCCTC
AAACAACATATCCACCTAAAAACAAGAACCCAACCGTTTATTCAAATGGGCTAATTCCAA
ATTCTTCGACATCTTCCGATAATTCAACGGGCAAGTTCAAATTCCCTGCCATGAATGGTC
ATGACTCGAACTCTAGGAAAACAACACTGACATCTGCTACTATACCTTCTATTAACACGG
TTAACACAGATGAATCTCTACCCGCAATTTCAAATATATCTTCAAATGCTACATCTCATC
ATCCGAACAGAAATTCCGTTGTTTACAATAACCATAAGAGGACGGAATCCGGAAGCTCAT
TTGTTGATTTGTTCAACAGGATTTCAATGCTATCGCCAGTCAAGTCAAGTTTCGACGAAG
AAGAAACGAAACAACCTTCAAAAGCTAGCAGAGCAGTTTTTGACTCAGCACGCAGAAAGT
CGTCTTACGGACATTCAAGAGATGCCTCACTTTCTGAAATGAAAAAGCATAGGAGAAACT
CTTCTATATTATCTTTTTTTTCTTCAAAAAGTCAGTCTAATCCAACGTCACCAACCAAAC
AAACTTTCACTATCGATCCCGCAAAGATGACTTCCCATTCTCGTTCTCAGTCGAATTCCT
ATTCGCATGCAAGATCACAATCTTACTCCCATAGTAGAAAACACTCGTTAGTTACCAGCC
CCTTGAAAACTTCTTTAAGCCCTATAAATTCCAAATCCAATATTGCTTTAGCGCATAGCG
AAACTCCTACTAGTAGTAATAATAAGGAGGCAGTATCACAACCAAGTGAAGGGAAGCACA
AGCACAAGCACAAGCACAAGAGCAAGCACAAACACAAGAACAGTAGCTCCAAAGATGGCT
CTTCCGAAGAAAAAAGCAAAAAGAAATTATTTAGTAGCACCAAAGAATCATTTGTAGGAA
GCAAGGAATTCAAAAGATCTCCCAGTGAACTTACCCAAAAATCTACCAAATCGATACTTC
CCAGGTCGAATGCTAAAAAGCAACAAACATCTGCTTTTACCGAAGGTATACGCTCTATCA
CAGCAAAGGAATCTATGCAAACTGCGGACTGTTCAGGCTGGATGAGCAAAAAAGGTACCG
GTGCTATGGGGACTTGGAAACAACGGTTTTTCACACTTCATGGAACAAGGCTTTCTTATT
TTACGAATACCAATGATGAGAAGGAGCGTGGCCTGATAGATATAACGGCACATAGGGTCT
TACCTGCCAGTGATGATGATAGGCTCATTTCCTTATACGCTGCGAGCTTAGGAAAAGGAA
AATACTGTTTCAAATTGGTCCCTCCGCAACCGGGGTCCAAAAAGGGGCTAACCTTTACAG
AACCTCGCGTTCACTATTTTGCAGTTGAGAATAAATCTGAAATGAAGGCATGGCTGTCAG
CCATAATAAAGGCCACTATTGATATTGATACAAGCGTCCCTGTCATTAGTTCATATGCCA
CACCAACGATACCTCTAAGCAAGGCACAGACGCTATTGGAAGAAGCTAGGTTACAAACCC
AGTTAAGAGATGCTGAAGAGGAAGAGGGAAGAGATCAATTTGGATGGGATGACACCCAAA
ATAAAAGAAATTCTAATTATCCAATCGAACAAGATCAATTTGAGACCAGCGATTACCTGG
AAAGTTCAGCATTTGAATACCCTGGTGGCAGACTTTGAGAACTGCAATCATTAGTTACTT
CTTGACCAACTTAAACACCTTAATAATTAATATTTAATAGAACATAATATAGTGATATAA
AGTATATAAAAATAAAAAGTTTACGAATTAATACAATCAAATTAGACACTGATACTATCA
AGAAGTACATCGCAGGAACCGCAGACATGATGTCCTCTTCTTTCAAATTACTGGATATAT
ATATTATTATTATTGTTACCATTAACGTTATTATTATTAACTATTACTATTACATTAACT
TAAAAATAAATATGAAACAACGAAGAACAAAAAGAATTATGAAAACATTTAACATGTTTC
AATTTGTTATGTTTTGGCCAACCTGCGTTTATTCTTGCATATGACATTTTTGTAATTCAT
CGATGATAACTTGGTTACCCTTTGGATCCAAATTCATAGCAACAGTTAGCTCCTTGATTG
CATCTTTTTTCCTCCCAACTATTCTATATGTTTGACCCAGCAAATAATGGGCTGTGGCAT
CATCAGGAACGAGTTTCACCAATTCTTCAAAAGTTTGCAAAGCAACATTATATCTTGTCA
TGGAATAGAGCAACTGGCCCATCTTATATTTGGATAGCGAGGAAGTCGGTTGCAAATGAC
ATGCTAGTTCATAATATTGTAGAGCCTTTTCCTTATAGCCCAGCTTTTCTAAAGAACCAC
CGCAACAACAGATTAACACAACATTGACGGGATTAATTGACCTTGCCTTTTCAAAATATA
ACAACGCTTCTTCATATTGACCTAATTTCATAGCGCTCGTACCCAATCCGTAATATGCAT
TGTAATGCTGAGGATCACAAGCTAGCGCCTTTCTATAGCATGTCTTGGCAGAATCCGAAG
AATCGTTGGAAGAATGTTCATGACCTTGCAAAGTATACGCGTATGCAAAATTTGGGTCTA
ACTGAGTAGCTTTTTCGAAGGCTTTTATTGCGGCATCATGATCCTTTTGCAATGATAGCA
AATTACCTATACAACACCATGTTTCGGGCTTATTAGGCATTGTATCCATTAGCCCATTTG
CCAAATTTGAAGATTTAACCTTGTCATGCAAATGCCACAGCAAAGTAGAAAAAATTTCCA
TATCTTTTACCCTTGCCGGTTGTAGGTCTTTCAATCTATTGAAATACTTTAAGGACATAT
CATAATTAATGATCTCAAAATGAAGTTTTCCTAATTGCACTAGACACCATGGCATTGTGT
CTTTAATATGAGATGGGATTTGAGACTCGAACAGTCTTATTGCCTTGAACGAATTGTATT
GTGATGACGACCTTAATATTAAAGCGAAATTATACATGATTTCAGGCAGCGTAATTGAAT
AATCACTCGTTAGTATTGAGTTACTGATTATTAAAGACCTTGGATTTTTCTTGGAAGTTG
TTAACCTTCCTGTTGAGGAATATAGGTTTCTTGGAGTTTTGAAAGTTGTTTTATTTATAA
TGTTATTATTATTATTATTATTATTATTATTATTATTATTATTATTATTATTATTATTAT
TATTATTGTTATTTTGGTGGTTCCTATCGTTATTTAACAGTTTCGATGGAGGAGTCGTTA
AAAGTTTGTTTCTGTTATAAACTTTGGCCAACGAGCTTATTGTAGGCTGTTTGGAGGATG
GAGACACTAAGTTCATGGAAATGTTATTTGGTAGCGCAGAAGACGTCTTACTGTTGATTG
CAGGGTTTTTAGGAGTTTGAGTATTTTTGTTCTGGCAGGTCCTTATTGATGTGTTCGCTT
GTTGCTGCTGTGACCTTGAGAAATGCTGAATGGAAGAAAAAGAAGATGCCGATGTAGAAG
GGGGAGAATTAGACGACTGAAACAGTGTATTAACATTATTATTGATATTATTATTGCCGT
TTTTGTTTGTTTTTGAATATAAGCTAGGTTGTGAACGAGGTTCGAAATGCGATAGTGATG
TAGACGGAAACGATGAAGCTGCATTATTATTATGACTATTACTTTTTTTCCCTGCAATGT
CGAAAAAAACCCTCTTGAGATCCACGGTAGCTCTCATTTTACAAATCGCTTCGTAAGATT
CCCAAAGGTAAGGATTAATGGCTAATGCTTCAGAATGATAAAATGCTCCCTCCTTAGAAT
GGTCCAGTTTCATATAAAGATTGCCTAACAGGCAATTCAAAGTGGCCAAATCGGGAATAT
GGACGAGATTAGAATTCAACACCATATTTATGCGCGTATTACTGCTGTTCGAAGAAAATA
CATTTATTATTGAGAGAAGAGTGAGGATAGCTTCGTTAACTCCCTGCGAAAGCTGTAAAG
CACAACGCCCGAATATGTAAGCGATACCAAGATGATACTCCTTGAATTCTTTGGATATCT
GGAACGCAGTGTGGTAGCTTTTATTCAGAAACAGCGAAAGTGCATATAAATATACCGCAT
CGGACCAGTAAACACTTGATTTATCGAGAATGGAGCATTCAGCATAGAGCAGTTCGGCCA
AAAACTCTGCGGTACTGTAGTTCAACTGCTGAATAGCCTGCTGAATGCAGTCCTGAAGCT
GTATGATGGTGCTCAAAGCTTGATCATCAAAGCTGGGGATTCCTCTCGAGAGGGTGAACG
GTGCTAACTCAGGATTTACCGCCATGCTATTTTTATTATGTATCCTGCACGAAAAGTTCG
TGTCGATTTATGAATAGATATGCAGTCACCAAAACAGAGTCTAAAACTCTCACAGCTAGG
TATGGTTTTTTGATAAACTTTTCTGTGGCACCTTTGCTTGCACTTTGATCCTTTTGGTTT
ACTTTCAGCCTGTTCCATCCTTTTGATCAAAAAAAAAAAGGAAAATCAAGCGCGGGTAAT
AACGGCACCATTAAATACTAGTAGTACTATATAGATGGTATAAAGAAATGATTTAAAACA
ATACGATTATATGATATTTATACATCTGTTTCAGTTGAGCTTTTTTTCCATAGAGCTGGT
GGTACGAAGATGGCTTTTGGCGAGGGCGACCGAACCAGATAGCTGCGTCAAGGCCAATAG
AAGCAACAGAACAGTATTCAATGCCAACAATAGCGTGCTTGCTTGTGAGTTTGGTGGATA
GGAATTCCAGCACCACTCGTGCAAGACGTACCAAATGGGACCAACGAAGAAGGGCATTCC
CGACCAAAAGATCAGTATAGGCAAAGTCCAGTGATACCAGGATAGAAACTGGTAGTGGAG
GGACCTTGAAAATAGGACGCCGATGAAGTTGGATGCGATTAGAACGAATGGAATAGTCTT
GGCGGGATTGGCATTGAGCACTGCATTTTTCCTCAGCGGATGGCACAGGGAAGACCATAA
ATCGGGCAGGATGCGAGGGTATCTTGTGACGAACAGTGTGGTGAGCGCTATCAGGTGGCT
GATTAAAAGGGCCAAGTGGAACCTCTTATCATTGAAAGCCTCTTCATCCATCATTTGCCA
ATTGATACTCCATTGGTACATAAACTTCCTGCCGAAATTAAAAGCGCAATGCAGGTACTG
TTGCGGAAAGCTGCGCAGGAAGGGCACTGCAACTGCGACTTGCCATGCAATCATCGCAAC
GAGATCCAACAAAGTAAGGATTACGTTCGCGTCATTAAGGATGAATAGAGAAATCATCAT
TGCAGGGAAATACAACAGCGCATTCATCTTAATGCTCACAGCCATACTGTATGTTGCGGA
GATCACCAGCGCAAGGGACTTCTTTAATTTGGGGCGCTGATGGCACCTGCTGGCCACGAT
AGCCCCCAAAACCGTGACGACCATAAACAAAGTAGTGAAGCAATCATTGAATAACCGTAG
CACGTAAATAGAGTGCAATCTTTTAGAGAGGCACGCCAAGACCACACACCACGGTGGTAG
ATGTAAAAGGTAGTAACACGCCATTTGTAACGCCAGTGTAAGGAGATACAAGTATCTGAA
AAACACTTGCCCGCGCTCAACGTGGTCCATTCCCTCTGTTAGCCAGTACATCATCTTGTA
GATCAAGACGTGGCCTGCTGGATACACCAGCGGGCCCGTTCCACCACTCACCTGAGAGTA
GTCCAGCATGCCATCGAGCTGAATCATCTCGATCTGCTCCATGTACGCCTTGTAATCGAT
CTCTGTGTAAGCTACCTTCTTAATGATAATCTTGCACAGCATGCTTTCGAACAAAATCAA
AAGGGGCATAACGATAAGATTGGCCCTACAATCGAAGATCACGTAGCGCACACCGTCCTT
GAGATCCTGCCACAGATCCAGCGGAGGTCTGACAAATTGCTTCCTTTGCAGAGACTTTTC
ACCTTGCGGAGACTGTTCACCTTCCATACTACTAGTATCTAACTCTTTCTCTCTCCCATA
CACACTCTATGATACTGTTTTCACTCCCAACTAGTGTACTGCGTTGTTCTTTAAGTTCGA
TAGCGAAATTTCTTTAGCTTGTTTACAGCACCCAGCAACCGCACACAGAATGTGACGGCA
AATGCATTTTACATGGAAGGCTATCTACAAAACAGCAATAAAGAGTCATGTAAGATTGGG
AAATCTCTAATGTGACATTCCATACTTGTTGCAACAATTTTGGGATGCTTCTGCGTCGTA
CGACCCTGTATTTACCTTCTCTAGCTCATCGCTTCCCAGGGTCCACGTTAATTTTTCAAT
TTTTTCTTGCGTGTCGAAGATTCAGGTCTCGAGAAATTTGTCAAAAATTTTTCACTAGAT
ATTAAGAACTATATACATCGAATAAGATGCCAGCACAGAAGAGATAGGCAATCAGTTTAG
ATACTACAGACACTATCCAATAGTGCAAAGCAAAAGCAGCATAGAAAAAAGAGAATCCCG
TTTCCAGCTTTTTCTCTTTTTCCCATTCGTTTTTCCTGATCTTTTTTTCTGCATCGTGGC
ACCTAGAACAAGAGGTACCTTCCATCCTTCGCTTAATATTTGATACGACTTTTTTGATTT
CCATTATTATTATTTGTTACTATTATTATTTATCATTTGGGTTTCGGTTTTTTGTAATAA
TTTTCTTTTTTTTTTTTGGCTCTATTTCACTAAGACATCGTATATATGCCAGGCCAGATA
ATCAGCATTCCGTTTTTGTCGCAGAACGAGGACATGGATAAATACTTGTTGGAGTACCGC
AGTTTGAAGCTCCTTCATCAGTCCAGTAATTCCTTCCAGTCTCACAATGCGCCCTCCCAC
CAGTCGAACTACCACCCCCATTACAATCACATGAAATACAACAACACTGGTAGCTATTAC
TATTACAACAACAACAATAACAGCAGTGTAAACCCACATAACCAAGCTGGTCTACAATCC
ATTAACAGATCTATTCCATCGGCCCCGTACGGGGCTTACAACCAGAACAGAGCTAATGAC
GTACCATATATGAATACCCAAAAGAAACACCACAGATTTAGCGCTAACAATAATTTGAAC
CAGCAAAAATACAAGCAATATCCCCAGTATACGTCCAATCCAATGGTTACTGCACATCTG
AAGCAAACGTACCCTCAACTGTACTACAATAGCAACGTCAATGCTCACAACAACAACAAC
AACAGCAACAACAACAACAACAACAACAACAACAGCAACAACAACAACAATCTTTACAAC
CAGACGCAGTTCTCCACGAGGTACTTCAACTCGAACTCCTCTCCCTCGTTGACTTCTTCC
ACTTCTAACTCATCCTCTCCATACAACCAAAGCACCTTCGAATACATTTTGCCGTCAACT
TCGGCAGCTTCCACAAATTTATCGTCGTCATCATCAAACAACTCTATGCACACCAACCCA
ACCACTGCAACATCGACATCCGCCGATTTAATCAATGATTTACCCGTGGGCCCCACGTCC
AGTTCGCTTATCTCGGATCTACATTCTCCACCAACTGTATCTTTCCTACCAGCAAGCCAA
ACCCTGCTCATGTCCTCCACCACATCTAGCTCTATTGGCACCAACATAAACCCACCGCAA
CATTCACCATCCCCATCGCAAAGGGAGGATTTTTCGACGGCACCAGTGAACATGTCTTCG
TCCGCATCACTCTTGATGAATGATTCTTCTTTAGGATGGGGGTCTAACCACATGAACGTA
TCTTCATCCTCTCAACCAGCATCATCAAGACCCTTTGGCATTTGGAATACTGACATGAGC
GTTTGGAGTTGAGATGTTTACGTATATTTTTATGTATATTATTATCATTAGTATTACTAT
TATTGTTATTATTTATGCACGGTTCCTATTTACACGCGGCGTTTATATTTTACCATTGAA
TATTTAAGATCTCTTTGAATTTTTTCTCGAATTCGTTTGCCTTTATACGTCCCTGGCTTC
GTCTCATTCCTTGTCCAATTAGGAATTTTAAAGAGGACTTCTTTTTACCAGTAACCAGGT
TCCGTATAAAAGTGTCATCTGTGTGCTGTGCAATGACATCATTACAGAGATCCATCAATT
CTTGAGGGTCGACCTGATTAATCGCATGCAATTCAAATTTCTCGATTAGTTTTGAAAAAT
CTGGAATAGACAAATCTTGGCAGTTACTCTGCTCGAAATTTTCCAATATGTGAAACAGTA
ACATTTTACCACTAGTTGCGGATATAACCTCTTCATGCAATAACTTCAAAAACTGGGCGA
AAACCGGAGGAGGCAAAATTTCTTTTGCTTTGGCCAATGGAATTTGTAGCTTGTTCAAAT
CTCCCAAGAATTCATGGATTATCCAATTCGTAGGTAATTTCGCGTTACTACGTTCACCAG
CAAGCTTGGAAAATTCACGGAAGGTGTCTAAGTAGTACGATCTCAACGCCTCATGATTGT
ACATATCGTTTTGGTTACTATTATAAGTCAGAATCTTGGCGTCCTTCAATGATAATTGAT
AGGGTTTCTTCATAAGAATTCTCATTATATCGTCCGGTAATTGGGGCATCAACCCTCTCA
CACCACTGATAACGTCTGGTGCGAGGTTGATATACGGCAATTCTGGATCAGGCATGTACC
TGTAATCGATCGTGGTTTCTTTGCTTCTCAACTTCACCGTTGATGAGCCTGTCCAGCCCC
TTGTTTCTGGCTCCATCAGTGAGCTAGTGTCACCCACAGAAATCAACTCAACTTGCCGCT
GATATTCGTACTTGATTGCATTGATGATGGAACTAGTATTGGGTAAATTCTTCAACTCAA
CGCGTGCATATTCATTAATTGAGAGGTTAACGTCCACTCGCATGGCGCCCGTTTCCAGGT
CCCCAGAGGAAATGTGCAAATGACGTACCAAATTCTGATATTTTTTAATAAACGCTCTAA
CCTGTTTAATATCACTGAAATCTGGTTTAGTTACCAATTCGATAAGCGGGACGTTCGACC
TATTTAAATCAACCAAAGTAATAACGTCTTTATCTGTCTCTGTATAGTGTGACTTCCCCG
TGTCCTGCTCTATCTGCAACTGTAAGATACCGATTTCCTTGGCTGATTCATCGATATCAT
CCAATTCCTTCGACAGATTGATCTTCCCACCCCGAGCAAACGGCCTGTAGTGCTGCGTCA
GTTGATAGCCTTGAGGTTGATCTCCATAAAAATAATGCTTCCTATCAAACTGAGATATGC
TATTCACTTGAGAACCCAGTGCCAAGGATAGTTTCATGGCAAACAAGATTGCTTCCAGAT
TCAAAACCGGCTGCGTTCCCGGTAGAGCTATGTCATAATAACTAGTATGATGGTTTGGTG
CATCCACTAGAGATGTGGCGCTATTCGTTGATTGTGAAAAAAGCTTGTTTTTGGTGTTCA
ATTGCGTATGAATCTCCAATCCACACTTCAATGCATATTCCGGCCTGAAGGGTGCACCGT
GACTATGTATGGCTTTGGTTCTGGCCAAAGAATAAAAACGTGCAAGCCGCAACATATCTA
GTTCCTACTCTGGTCTTTTTGGACAGGAATGCTAACAATAACACTATTACTAGGTGGTAC
GACTAAGTACATCACGTCAAGCTTATTACTACTATAACTACTATTATCATAACAAAAGGG
AAAACTAAACCCTATCTAAACAAGGGTTATTTAAATTTTTAACAAGGGCATACAACAAAA
AAATAATAAACCTAAAATCAGAAAGTTAATCTTTCAGGGCTTTTGAAAGTGGAATTAACG
TCTCTAGTAAACGAGGATTGTTTCCAATGAGATTCTAAGACCCAAATATCCTCTTCTTTA
CTTTGAAATGTTTGCAATGGACCATGATTATGGATGTGTTCTTTGTGACACGCTTTCAAT
GTACTCTATATCGTGTTGCACGAAGGATTGTTACTTTATTTGTAAAAAAAAAAACAATTT
TTCGAGATGGGACATTAATATTGTAGAATTCTGAACATATTAGTGAACAGTTCTTTCGGA
GAATTACTGGAACCTAGGATCTGACAAGCGGACAAAAAAGCAGAGTGCGTTTATTACTTC
TCTTTCTAGCGGTTGTTCATGTTTCAAAGTTTTTTCCACAACAATGGGCCCGCTGCTGCC
GGTGAAACGTTTTCAGATAGCAGATCGTACCCTTTAACGAATCATCAAGAAGTACCCAGG
AATGGACTGAATGAGTTGGCCTCATCTGCAACCAAGGCGCAACAACAACCTACACACATA
TTAAACTCATATCCAATTACCGGGTCCAACCCACTCATGAGGGCAAGCGCAATGGGGGCG
ACCTCTGGCAGCATCAATCCTAATATGTCCAACATGAATGAGCACATTCGTGTTTCCGGG
ATGGGGACTTCTAAGCCCCTGGACTTAGCGGGAAAGTACATTGACCATCTACAACATAAA
GATAGTAACACTCCCGTACTCGACGAACGATCTTATTATAACAGCGGGGTAGATTATAAC
TTCAGCAGAGAAAAAAACGGCTTAGGAGCGTTTACTCCATTTGAAAAGCAAGATGTGTTC
AACATTCCGGACGAGATTTTGCATGAATTTTCCACTTCACAGACAAAAACTGATATGGGT
ATTTTCCCGGAGTTAAATCGATGTTGGATAACTATTGATAATAAACTGATACTCTGGAAT
ATTAACAATGACAATGAGTATCAGGTGGTAGATGATATGAAGCATACCATTCAAAAAGTC
GCCTTGGTAAGACCTAAGCCAAACACCTTTGTGCCTGCCGTGAAGCATCTACTTTTGATA
AGCACGACAATGGAGCTTTTCATGTTTGCTATTTCCTTAGACAAAGCCACCAACGAACTC
AGTGTATTCAATACACATCTATCAGTCCCTGTACAAGGCATTGATGTAATAGACATTGTG
TCTCATGAAAGATCGGGTAGAATTTTCTTCGCAGGCCAAGCCAGTGGCCTGAATATCTGG
GAGTTGCACTACTCAGGTTCCGATGACTGGTTCAATAGTAAATGTAGTAAGGTCTGTCTG
ACAAAGTCTGCCCTATTAAGTCTTCTACCTACTAACATGTTATCGCAGATTCCAGGTGTT
GATTTTATTCAGGCTTTGTTCGAAGATAATTCTAACGGTAATGGCGGATTTTCTCAAGAG
ACCATCACGCAACTAACTATTGACCAACAAAGAGGAATCATCTATTCATTATCCTCCAAA
TCCACCATTAGAGCATACGTAATAACAGAAAAATCACTGGAAGGACCCATGTCAATTGAG
CCTGCCTACATCAGTAGGATCATAGGTACCACGACGGCAAGGGCAGCACCGATTTTGGGC
CCCAAATACCTAAAAATTGTCAAGATAAGCTCTGTTGCACCAGAAGAAAACAACAATTTG
TTTTTAGTTGCTTTAACAGTAGGTGGTGTGCGTTTGTACTTTAATGGTTCCATGGGCAGA
TTTAACATCGAAGCTTTGAGGTTAGAATCGATCAAGTTCCCCCCTAGTTCTGTAACTCCT
GAAGTCATCCAACAAGAATTACTACATCAACAACAGGAACAGGCGAAGAGAAGCTTTCCT
TTCTTTTCAAATCTAATGTCTTCCGAACCAGTCCTCTTAAAATTCCAAAAGAAATCATCT
GTATTACTAGAGACTACAAAAGCAAGTACAATTATTTCCCCAGGCATATTTTTTTCCGCT
GTGATCAAGTCATCTCAGCAAACTCATCAACAAGAAAAAAAAGAGAACTCATCTGTTACT
GGAACGACCGCTACCGCAGGGTCTAAAACTGTCAAACAACAGCCAGTTACTTTACAACAT
AAGCTTTTCGTTAGTGTTCCAGATTATGGTATCTTGAAAACACACGGTAAGTACGTTGAA
AATGCCACGTTTTTGGAAACTGCGGGCCCAGTTCAACAAATTATTCCCTTATCGGGGTTG
TTTAATGCAACGACAAAGCCACAAGGATTTGCTAACGAATTTGCGACACAGTACACATCA
GAAACTTTAAGGGTAGCAGTTTTGACGAGCACTTCTATCGAAATTTATAAATATCGTACT
CCTGATGAAATTTTTGAGGATCTAATCGATAATCCGCTGCCATTCGTCTTAAATTATGGT
GCCGCGGAAGCTTGTTCCACTGCATTGTTTGTTACTTGCAAATCAAATAAATCTGAAAAA
TTAAGATCTAATGCCCTGACTTTTTTAACTATGGGTATTCCTGGCGTTGTTGACATCAAA
CCTGTCTACAACCGTTATTCTGTATCTACAGTATCCTCTTTATTGTCAAAGCCCACTTTA
TCAACCGCAACAACTAATCTCCAACAATCAATAACTGGCTTTAGTAAACCCTCCCCTGCA
AACAAGGAAGATTTTGACTTAGATGACGTAATATTATCCCCCAGATTTTACGGTATTGCA
TTATTGATTACCAGACTACTTCGAGATATTTGGGGGAGACATGTCTTCATGACTTTTACA
GATAATAGGGTGACATCCCATGCTTTCATTTCTTCTTCTGATCCAATCACTCCATCTATT
AATAACCTAAAAAGTGATGAAATTTCACAAAATAGGAACATAATATCAAAGGTTTCTATT
TCCAAGGATTGTATCGAGTACTATCTATCTTCAATTAACATTTTAAATGAATTTTTCATC
ACTTATGGTGATTCAATTTCCCAAATATCAGCTCCCTACGTATTAGCGAACAATTCTAAC
GGCAGGGTTATTGATAAAACAGAAGAAGTTGCAAACCAAGCGGAAAGTATAGCGATTAAT
GCGATGATCAAAATGGTACAGTCCATAAAGGAAGGTCTATCATTCTTGAACGTTTTATAC
GAGGAAAGCGAAGTCGAAGGATTCGACAACCAATACCTTGGTTTCAAGGATATAATCAGT
TTTGTAAGCTTGGACGTCCAAAAAGATTTAGTCAAACTAGATTTTAAAGATTTATTTGCT
CCAAATGACAAAACAAAATCATTAATTAGAGAAATTTTATTATCCATCATCAATAGGAAT
ATCACCAAAGGTGCGTCGATAGAGTATACCGCAACAGCTTTACAAGAACGCTGTGGATCA
TTCTGCTCTGCAAGTGATATATTAGGATTTAGAGCCATTGAACATCTTAGAAGGGCTAAA
GAAATTGGCTTGCGTAACTATGATTCTCTAAACTATCACCTGAAAAATGCTACTGCTTTA
CTTGAACAAATTGTGGATGATCTTTCTATCGAGAAATTGAAAGAAGCTGTATCAATGATG
CTGAGTGTAAATTATTACCCAAAATCTATTGAATTCTTATTGAATATTGCCAACTCTATG
GACAAAGGCAAACTAGCTTGTCAATATGTGGCAAATGGATTTTTAGAAAATGATGATAGG
AAACAATATTACGACAAACGTATCTTAGTTTATGACCTAGTTTTTGATACTTTAATAAAA
GTAGACGAACTTGCCGAAAAAAAACAGTCATCAAAAACTCAAAACCAAATTTCGATATCG
AATGACGATGAAGTGAAACTGAGACAAAAAAGTTATGAAGCCGCCCTAAAATATAACGAT
AGATTATTCCACTATCATATGTATGATTGGCTTGTGTCTCAGAACAGAGAGGAAAAACTA
TTAGATATTGAAACTCCATTCATACTCCCTTATTTAATGGAAAAGGCAGGTAGTTCATTG
AAGATATCTAATATACTCTGGGTCTATTATTCAAGAAGATCTAAATTTTTCGAATCTGCT
GAAATTCTTTACCGTTTAGCTACATCGAATTTTGACATCACATTGTTTGAAAGAATTGAG
TTTCTTTCACGCGCCAATGGTTTTTGCAACAGTGTGTCACCATTAAGCCAGAAACAAAGA
ATTGTACAATTAGCTAGTAGGATCCAAGATGCATGTGAAGTTGCTGGTATTCAAGGTGAT
ATATTGTCGCTCGTGTATACAGACGCAAGAATAGATTCAGCCATTAAAGATGAGCTGATC
AAAACTCTAGATGGTAAAATATTGAGCACAAGTGAGCTGTTTAATGATTTTGCTGTACCC
TTAAGTTACCATGAAATTGCCCTATTCATTTTCAAGATAGCAGATTTTAGGGACCATGAA
GTAATTATGGCCAAGTGGGATGAGCTATTCCAATCTTTGAGGATGGAATTTAATAATACC
GGAAAGAAAGAAGATTCAATGAACTTCATCAACTTACTGTCTAATGTACTGATTAAAATT
GGTAAAAATGTTCAGGATTCTGAATTCATTTTCCCCATTTTCGAACTCTTTCCCATTGTC
TGTAATTTTTTCTACGAAACACTACCTAAGGAACATATTGTATCAGGGTCGATAGTTTCT
ATATTCATAACAGCGGGTGTTTCTTTCAACAAAATGTACTATATTTTAAAAGAACTAATC
GAGACATCAGATTCCGATAATTCCGTATTTAATAAAGAAATGACCTGGTTAATTCACGAA
TGGTACAAATCGGACAGGAAATTTAGGGACATTATTTCCTACAACGATATCATTCACTTG
AAGGAATACAAAATTGATAATGATCCAATTGAAAAGTACGTTAAGAACAGCGGCAATAAT
TTGGGGATTTGTTTCTACAAAGAATAAAAATTCATGTTCGACATATAGATAGCAGGGTAA
TGTACGTGTATATTTTAATGTAATAAAGAGGCCTTACTAGACGGTAAAGTTAAGAATATC
GAGTGAACTTTTCCTTAAGATAAAGGTAAATATAGTCGAGTATTTATTTATTATTCTTTT
CCACTATACAGTATTTAAAATTCTGTAAGAAATTGATTCTACATACATAAGACAAACGAA
CAGGTCAGAGAGAATCAGATTTTTGGTTAGCAAGAATACATTTTGGAGAAGAAAGACATT
AACTCCACCTTACTGTATCATCTTATTTGCTTTTTCACTCCTTCCTAATATTTTTTTTAT
TTTATTTTGAATTTCTTCCTATTTCTGATGCATTGAACAGATCGTAATCTGTAAGTAAAT
ACCATAACGTGCTCACATTTGTCTCCAAATACTGGTGAAATCTTGGCTCCGTTGTGTACA
AAACTTCTTAATGAATATATATATATTTTTCCCTTATTTTATCTTTTTTTTTCGAATTTT
TTATGTAAACATTCTTATACTGGAACAATAGATGGCTAATGAGTCCCTATAATTTCGATT
TTAGATGTTAACGCTTCATTTCTTTTCATATAAAAGACTACCTGCCAAATGTATTTTCTC
CTGAGTAAGTGACATACAAAAACCCGTCCTTATCCTTGTGTTCTTGATATATGGCAGACA
TCAACGCCGCAGTAGGTGGCAAAGTATCATTGACAAAAATGAAGATGGCCTTCTCAGGGG
GTAGCATAATTCTCTTTCTTATAACATAAACAAATTGCCCTACGGTAAGGTCAGCAGGAA
CTAGATATTTACGCTTATCAATCTCTGGAATATCTGACTTTTCAGCTTTTTCGCAAATCA
CAGGTATCCTATTCTTGAACCTGTCAGCAATCCTCTCCGACTCCGCCTTCCTTTTTTCAA
ATGGATATTCAGACTTAAATGTAGACTTCATGTCTCTAGTAATTATTTTATTATGATTTT
CTCAACTTTACAATTATTAGATTCTCTTATCAATCCCCTCCTCAACCTTTAATGGTTCCC
CTTTTTGTATTTCCATAATTATACCAAATATTTTTGCCGCCGCCGAAAATAACCGGCCTC
CGGGTGATGATATATCATGTGCTATGATTTCACGGGTATTATACAACATTATCGGTGGAG
ACAGTTAGCATTACATGACTCTAACTTAAACGTAAACTTACACATATACATCTATATCAC
TTCGAGTAGAGAAAAATTTGTACGTATTTATATGAGTTGTTTTCATAATTTGAACACTTT
TAATTTGAAAATGGTGTCATTAATAGATTGTTCTTCATCACCAATTGGGTCTGTCTTTGA
GCCGTCATATTTGGCAATGTCGGATCTACAGGTCTTGCTTAACATATCAAAATGTTCTTT
GACAATGGCTTCAAAGTCGATAGTATCTTTAACTAATTCGTACTCCACTAAAACATCGTC
GGTGGCTTCCAAACCACACTTCTTTCTCAATTTTTGGATTCTGTTGACCAGCTCTCTTGC
GAGACCTTCACTCTTTAGTTCAGAGTAAATATTTGTATCCATGATGATTAACACGTCTTG
GTCGGTTCTGGTTTCTTGTCCAGCTTGGACAGCAGATTCTGGCAAGCCTCTAATAGCATT
CAAATCTCCTTTAACCAGTTCAATACCGGCAACCTCCAACTTTCCGCTTTCCAAATATTC
CCGTACTTGCTCAGAAGTGACTGATGGTAGGGCATCTTTAACCTTCTTTGCGTCTTTTTT
CAACTTCTTACCCAATACAGGCCAATCAGCAACTGCTTTATACTCAACACCATATTTTGC
CTCATCGGAGGTGATAACAACATCACGAACATTTAATTCCTCGATAATGTAGTTTTTCAA
GGCTTCTACATCCTTCAAGTATGATTCATCACTGTGAAGGATGACCAAAGTCTTCAATGG
AGTTTTTAAGGAAATAGTTTTCTTTTCACGAATGTTTCTACCCAAATCGATAACGGATTG
CATTCTAGAAACTGCAGTTTCGATGGCCTCGTCAAAGTATTCTTTCTTGACCACTGGGTA
AGATAAGAAATGGACTGATCTTCCGTCCTTACCGTATTTTGCTAAGACAGCTTCTGGGAT
GTATTCCTTCAGTCTCAAATAAATGCTTTCTGACAAAAATGGGGTGAATGGAGCCATGGC
ACGGACAAATGTGAATAAGGCATCGAATAAAGAATTTAATGCTTTCAAACAGTCCTCAAC
ACCGTTTTCACCCTTCAAACGACGACGATTAAATCTAATATACCAGTTTGTCAATTCATC
AATGAAATTCAAAAGTTTTGGAACGACAGTGTATAATTTGTACTGACCCATTTCTTCGTG
AATGAATTGTACTAGAGATTGCATAGAAGCTAAAATCCATCTGTCCATGACATTATCACT
TTTCACAGAATCATCATATTGGAAGTCGATGTTAGACATCTTTTTCAACAAGGCAATTTG
ACCGTCCAAAAATTTAAAGGAGTTCCACCATGGTAGTAAGACCTTTGAAACAACCTCCTT
AACACCCTCTTCTTTGAATTTCAAACTTTCAGCTTTTAAAACAGGTGAGTTTATCAAGTA
CAATCTTAATGCATCCGCACCATATTTGTTCAGAACAATGGATGGATCAGGGTAATTTTT
CAAGGATTTAGACATCTTTCTACCATCGGCAGCTAAGACAATACCAGAGACGATGACGTT
CTTGTATGGAACAGAGCCAAATAGATGGGTACCTAAGACAGCTAACGTGTAGAACCAACC
TCTTGTTTGATCCAAACCTTCAGAGATGAAATTAGCTGGAACTCTTTCGTCAAATTTTTC
TGTGTTTTCAAATGGATAATGTTGAGAAGCATAAGGCATAGAACCAGATTCAAACCAACA
ATCAAAAACTTCTTCAATTCTCTTTAAGTCACCCTTACCTTGCTTGGATGGAATTGTCAA
TTTGTCAATGACATCACGATGCAAGTCAGTGATGTTACGCACACCGGTCAATTCTTCCAA
TTCTTTGATAGAACCAACACAGACGACCTCCTCAAAATCGTCTGAAACCCATAAAGGAAT
TGGAGTACCCCAATATCTATTTCTGGAAACGTTCCAGTCACGGGCATTGGCGATCCAGTT
GGCGAACCTCTTTTCCTTGATGGTGTTAGGAACCCAGTGAGATTTCATCACAGAATCCAA
CATTTGAGGGACAATGTTTTTAACACGAACGAACCAAGCTGGAACAGAACGGTATAACAA
TGGGGTATCGGATCTCCAACAGAATGGATAGGAATGGCGAATTTGGGATGCCAATAACAA
ATTTCCAGTATTAGTTAAGTACTTAATAATCAACTTATCAGCGTCCTTGACATAAACACC
CTCAAAATCAGGAACGTCTTTCGTGAATCTACCAAGGTCATCAATGGCGTTAGGTAACAC
TGAATCTTCGGATATGACGCCGTTCTTCAAACAAGCAGCATTATCCTCTTCACCGAAAGC
GGGAGCGTTATGAACAATACCAGTACCGGAATCACTAGTAACATAATCATCTGAAATAAC
TCTAAAAGCTGTTTCATGGAACTGTTCAGCGAAATATGGGAACAATGGTTCATACTTCAA
ACCAACCAAATCAGAACCTTTAATTTTTTCCACAATCTTATATTTTTCATTCTTAGGCTT
CTTATACAAGGTTTTAATCAAAGATTCTAATAAGATGAAATAACGATCTCTGGTTTCGTC
GTAAATCTTTACATATTCGAAATCAGCGTTAACACATAACGACAAATTGGAAGGTAAAGT
CCATGGAGTCGTAGTCCATGCGACCAATTGAGTTTTTTCCTGGCCAATAACATTGAAACC
AATGGTCACAGCTGGGTCGTTAACATCTTTATAGTTTTGCTGAGCTTCAAAGTTACTCAA
GGGAGTGGTTAGGCCAGTAGAATAAGGCATAACTTTGAATCCACGGTAAACTTGACCTTT
TTCATGAAGTTGCTTGAAAGCCCACCATGTGGACTCCATAAAGGATGGATACATAGTCTT
GTAATCGTTGTCGAAATCAATCCAACGACCCAAACGACCAATAGTTTTTCTCCAATCACT
GGCATAAGTCATAACAATGGATCTACACTCATTGTTGTAGTTTTCAAGACCATACTTGAA
GACGTCATCTTTACCCGTGATACCTAATTTCTTGTCAATGATATGTTCAATTGGAACACC
GTGTGTATCCCAACCGAATCTTCTTTCCACGTGGTGGCCTGTCATGGTAGCGTATCTTGG
AACAATATCCTTAATAGTGGAAGCAAGAATATGACCGTAATGAGGAGTACCGGTGGCAAA
TGGAGGCCCATCGAAGAAGGAAAACTCCGGTTTGTCTTTTGTTAATTCTAATGAAGTATG
AAAGGCATCTATTTCATCCCAAAGAGATAGAACTTTTTCTTCCTCCTTTGGAAATGAGAA
GTGTGCGTTACTCTCGGACATATTTCCTTGGTTTTTTGAAGCTTTTGGCTAAAGGTTGTA
GGAAGTCGAGTAACATCACTCTAGTTTAAAGCGCAAAATGATATTTTTCATGCTTAAGAG
TCATCATTGTTTCGAGATTTCTTGCGTGCTGCGGAAACAAAAAAAAAAAAAATTTTTCGT
CATCATGGATAGATTACCCGCCATCGTATAAAAGGTTAAACATAAAAAGTAGCTAAATAG
AACACTATAGAAGAATAATCAATCAACCTCTTCCACTGTTGGACCTGTATCTTCTCCACC
TCCCGTAGCACCCGAGTTGGGCATGGATCCGGGGAATCCACCGGATTCCCCCGCTCCAGG
ACCTGCGCCGGCACCAGCACCGTAAAATTTCGTCATTATTGGATTGGCAATGCCTTCCAA
CTCCTTTTGTCTATCCTTATATTCGTCCGTAGAGGCTGCCTGCGATGCATCTAACCAGTC
AATGGTTTCCTGAGACGCTGTTTCTAATCTCTTTGCATCATCTTCACCTACTTTCTCTTT
GAAACTTGCTTCGTTTATGGTATTCTTCAAAGTAAATGCATACGATTCAAGCTGATTCTT
AGCCTGAACTCGTTCTGCCTCCCTTTCATCGTCAGCCCTATATTTTTCAGCTTCAGAAAC
CATCCTATCAATATCATCCTTCGAGAGCCTACCTTTATCGTTAGTGATCGTGATTTTGTT
ACTCTTACCAGTACCCTTTTCCAAAGCAGACACATTAAGAATACCATTAGCGTCGATATC
AAAGGTAACATCAATTTGAGGCACACCTCTGGGAGCAGGCGGAATGCCACTTAATTCGAA
TTTACCAAGTAAGTTATTATCCTTTGTTCTTGTTCTTTCACCTTCAAAGACTTGAATTAA
AACACCAGGTTGATTATCTGCATAGGTAGAGAAGGTTTCCGATTTCTTTGTTGGAATCGT
TGAGTTTCTAGGAATTAGCTTAGTCATTATGCCGCCTGCAGTTTCAATTCCTAGGGACAA
TGGCGCAACATCCAATAATAGTAAATCTTGTGTCTTTGTTGATTGATCGCCGGTTAAAAT
GGCAGCTTGAACGGCTGCACCATAAGCAACAGCCTCATCCGGGTTGATAGAACGATTAGG
CTCTTTGCCATTGAAGAAGTCAGAAACTAATTTCTGAATCTTTGGGATTCTGGTAGATCC
ACCGACTAACACAATCTCATCAATTTGGGACTTGTCCAGCTTCGAATCTTTAAGAACCTT
TTCTACTGGTTCCAATGTGGATCTGAATAAATCAGCACATAGCTCTTCAAACCTTGCCCT
TGTTAACGAAGTGTAGAAATCCATACCTTCAAATAAAGAATCGATCTCGATCGAGGTTTG
AGATGAGGAAGAAAGCGCTCTCTTAGCTCTTTCTGCCGCAGTTCTCAATCTTCTTAACGA
TCTTTGATTATTAGAGATGTCCTTTTTCGTTTTCCTTTTGAATTCAGTGGCTAAATGGTT
CACCAACCTATTATCAAAATCTTCACCACCTAAATGAGTGTCTCCTGCGGTAGCCTTAAC
CTCAAAAACACCCTCATCAATTGAAAGTAAAGAGACGTCAAAAGTACCACCACCCAAATC
AAAAATCAGGACATTGTGCTCAGCCCTGCCTTTCTTATCCAAGCCATAAGCAATTGCTGC
TGCAGTGGGTTCATTGATAATACGTAAAACGTTCATCCCTGCAATAGTTCCTGCATCCTT
AGTGGCTTGTCTTTGAGAATCATTGAAATATGCAGGAACAGTTACAACAGCATCATTGAC
CGTAGTTCCCAAATAGTTCTCAGCAGTTTCCTTCATTTTGCTTAAAACCATGGAAGAAAT
TTCCTCAGGCGTAAATGTTTTCGTTTCACCCTTATATTCTACTTGCACTACAGGTTTACC
ATCTCTGGATATAACTTTGAAAGGGAAGTGCTTGGCATCTGTCGTCACTTCAGGATCATC
AAATTTACGACCAATTAACCGCTTTGCATCAAAAACTGTATTATGAGGATTGATTGCAGC
TTGATTTTTGGCGGCGTCACCAATTAATCTTTCGGTGTCTGTGAAAGCCACATACGATGG
AGTGGTCCTATTACCTTGATCATTTGCAATTATCTCTACCCTATCATTGGAAAAATGAGC
AACACACGAGTAAGTTGTTCCCAAATCAATACCAACTGCTCTAGACATTTTTCTTTGTAG
CGTTTAGTACCTATTCTATCCGTTTAGTGACAAACATTGACATACAAGAATGTTTATGCT
ACCAATTTCAGTCACTTTATATACCCTTCCATTCGTTTCCAATTGTGCAATATGATACAT
CCCTTAACCATCTTCTGGTCACCCTTGTGGCTGCTTCTGTAATATTCTATAACTTTCCAC
AGCGATCCCTAATTAAGGGCACCCATAACCTCCATAGGCATCAAGTCAAATACGTTTGAT
GATAGCGCCGCACGATGATCGTTATGGCCTTTGGTAATAGAGACCGCCAACAATGGTAGG
GTTGTGCTCATCATCCTCGTCATCCCTTTCTTCATCACTGATACCGTAAATAAGAGCGTC
GTCTTCATTGTCTTTACCAAGCAATTCTGGATATTTGTTTTCCATTATCTTTTCTGTGTT
GTGTAGGGAGTTTTTTTGAAATGACGAATACAGACAAATATTCCAAACTCGTTCATTCAA
CAAGATGTCTGAGTATTGTTCAGGCAATGTCTTTATCTGATAATATAAGATTTCGTCTAA
TTTATCGAGCATATGTTTAGGCACCGTAGCGCTTGAACATATCAGTTCGATCATAGCATG
CCATTGCAAACTCGACCCGTAGTTACCAAAAAACATGGCATTTAAGAACGCAAACTGCAA
CTCCCCAAAATAATTACTTGAATTTTTAAAAATTCCTTGTAGCATTACAGTGTTCAAGTA
GTAAGACTTGTCTAAAAAATCCTCCATTTCATGGCCAGGCCTTATGGCTTCTCTAGATTT
GAAGTTTATTACTGTATAGTTTAAAGAATGTGCAGGATCATCTTCATTCTTGGCTTCCAT
TTTAGAACCTGCTTTTTGCAAGCTGGATTTTAGCAGCTCATTTTCTTGAACTGTGGTCAT
CGAAGAATCTACGTAAGAGAACTGGTTTTCATCTTTCCTTACTATCTTTCGGATTTTATC
CATCTGCACAAACTCGGTAAGATTGTACCAGGTATCATCTTCGTCAATTTTCGGATAAGA
AACCATCATCTGCCGTTCCTTGAAGTTGTGAACAATATTCTCGAATTTTGCGCCATCCCT
TTCTTCCATCATTTTGTAAAGGCCATCTTTAGGATCATACTGAATGTAAAAGTTTCCCAT
TCTACAGTCAAACCAGTAGCCATACCTCATGCTGGAATTATCTGCATGCTGAAAATGAAT
GACATGAACGTGTCCAATGGGGATGTCCTTGATTCCGTGAAATGGCTGATTCTCCTTGAC
ATTAAAGGAATACTGATCGATCCCTATAGTTACCTCAATCGGAGCAGATGTAAATGGTAC
AGTATTCATTGCAGGCTTCCGATATTTTATTTTTTAGCCCCATGTCCCAGCGATAAGGAG
GATCTTTGGTGTCCATTCATCTCATTAAACCCTAAACCATTGAAATATTCGTGTTCGTGC
GTCGCGATTTTTTCCGCTTTCAAGATGTGTCCTTTCTTCATCTCTTGGTTCTTATAAAAG
GGCGCCGCAAACCCCTCCTAATTACTTTTTCCTTTTCACATCCCATGGGTTTTATCTTAT
ACCAAATGTTTACCATTCTGAATCGTATAGCCAACAAGTAACCACAGCTGCAATTGTGAA
AAAAATTGATAGGTGTGGTCACCCAACTGTTTTTTTCTCTTTTTCTTTTTTTTTTTTTGA
AATGGCTAGACGGTGCTTTTGCTGGTAAAAGAAAAACTCTTGTTTCAATTTAACATGATG
AAAAAATATATTAACACAGACCTGTACTGAACTTTTCGAAGTTTTGCAGATAACAATATT
GCTTTTTTTCTCTGACTTTAACTAATCGTTCTTATTTCTGTATATACTATGACCTTGCAA
ACCTTGAAATGCAAAATTCGTATTCTCTGCTAAATTGAAAAATTTAGAGCATGAAGTGTG
TTTTCCAGCAGACACCGCCTGTGAAAAAGATGGTAAAATGATATGATAATTAAACACACA
TAATAATAGCATATATGATATATAAGACTATATGAAGAGATGAGGAGAAGAGAAGAAAAA
ATTGGTAGTATTTTCATTTCATCTATTTCTTAGCAGTCAATCTTCTTAGGTAGAAAGCTA
ATTCTTCACCTTCCAAGATGTAACCATCACATCTACCGGATTGACCTGGTCTGGAAGAGA
TACAAGCGTATAATCTACCGGCGCTGAATTGAGATTCAACGGAAGATTCGATCTTGGCAG
AAGCAGCTCTAGCAGCCCACTTTCTTTCAGCGTTCTTGCTCTTGGCAACAGTTTCTTCTT
CCTTGACGTTCTTCTTCTTACCCAAGGTTTGACCGTAGTGAGCTTCGAACCATTGTCTGA
ATGGAGTAGCATCAATTTGGACAATGGCAGCCTTGGTCAAAGTGTTAGTTCTAACCAATT
CATTGTTGGATGGATGGTAAACAACACCAGCAATTCTGGTCTTCTTGGAGATACCTTCAG
AAGCCCAAGAAAAGTTACCGGTTTCAATTCTTAGAGCTCTGTATTTCTTGTTACCACCTC
TAGTTCTAACAGAGTGAATTCTCTTAGCACCGATCTTGGTGTTGGCTGGTTGACGGCCTA
ATTCGAACTTTCTCTTCTTTCTGAATTGAGCACGCTTGGCACCGGTAGCGGATCTTTTGT
GACGAGAATCACGAGAAATACCCATTTTGTAACTGTAATAGAAAATTTAATGACGCTTGT
TAGTAAAATAAAGAACGTACAAAAGTTGCGGAATTTTTTTCTTATCTTGAAATATGCTTT
GGTTTCTTTTCATCTCTTCTTGTGAAAAACTCGGCGTTTCATAAGAGGCTTGATTTTTTG
GGTACACAAAGGATTCAGTTTAGTGCACTGCTCCTGTCACAATTTATATCATCCCTTTTA
GTTAAGTTTACTTTTTCCACTATCTATTCCATTCAAAGAGAGGTCCTGTAGCATTCAAAA
TAATATGTAGTTCCATTACTCATATGACCATAGCACATACTTTTTGTCCTGGTGTGTTTA
TAACGTCTTCTTGTGAGTACCAAAAAGCAAATGGCAAGTGTAATTTCCTATAACTTTAAG
ATAGGCCTGTAAATAACGTATATGAAACAGTTCCATCCCGTAACACCATGAACACTGCGT
AAGAGAAAGCCCTCAAGCTTTCCCAGCGATGCTCGTGTGTAGGACCGAACATGGAGGGGG
GAACTAGGCCCAGCACGGGTTTGGCGAGGCCGCTCTGCTCGCAGCTCAGGATTCTAAAAG
GTTATTCCGCTGAGAAAATCAGAAAATAGGAACTTCTCACGCAATAATTTTAAAGTTGAT
GAAAAAGGAAAATTTGTAAAAGTGTAAGGGTGTTAAAGAGGGTGTATGGATGTAAAGTCA
CAAAAGTTAGAGCAGATGAAAAAGAAATGGGTGGAGACAAATCCGAAAAAGGACCTATAT
TATCGCTATAAAGAGCTTCTCATCGCTTTTTTTTTTCAAAGACACATACATACCACGACT
GTAAGCACATCATTTGTACAATACATTACCAGCTGAAATGTCAACATATGACGAAATCGA
AATCGAAGATATGACGTTTGAGCCTGAAAATCAAATGTTCACCTATCCTTGTCCCTGTGG
AGATAGGTTTCAAATATATCTGGATGACATGTTTGAGGGCGAAAAAGTTGCTGTTTGTCC
CAGCTGCTCACTGATGATCGATGTAGTTTTCGATAAAGAAGACTTGGCTGAGTACTACGA
AGAGGCAGGCATCCACCCCCCTGAGCCTATTGCCGCTGCTGCCTAAAGATGAGAGGCTAG
ATCGAGAATACAAATAGAAATAAAGAAAGAGCTATATGACTTAGCAACGCAAGCAGAAAA
GAAGGTTTGCTTCTTCGCTGGACTCCGGTTGGAATTACTATTCAAAATTCCAAGTGCACT
GATGGAAAACGTTTTGCTCAGGTTGAGCTCTTTTACTGCATATAAGGATACTGGGTAGGT
GTATATGATTATTTTATACATGATACGTAGGCTAAAATGATTTGGACCCATTAAATCATC
TTGTCGCATCTCTTTTCTTTTTCCTCCATGCTCAGATTTCAATAATATCATCTCAAATGG
CTGTGACAAATTTCACCGGAAAGGCGAGGGATTTTTCTGTTGACATTATCAAATTAGCTT
TTTGTCAAAATAATGAAAAATAAAGAAAATATATAAAAGTACATATTATAATCAAAGCTA
GCTCAGGTATATTCCCACCTTGTCGAGCATTCCGGAAGCTACAAATACGACATTGCATAC
CAAGAGGCAAACGTTGAACAATGGCTAAAGATATTTTGAAGAACCAGGACCCTAAATTGC
AAGCGATGATCGTTGAACACTCGGCGCCTGCTCCCAAAGAGATACCTATGGACGCTCCTG
TTTTGAAAAGAGTCGCTAGACCTTTAAGACATGTAAAGTTCATTCCAATTAAATCGCTGA
TATTCCATACTAAAACAGGGCCCATGGATTTTTCTTATGAAAAGAAGATCAAGACGCCTA
TTCCTAAGAACAAAATTGTAGTTCGAGTAAGTAATGTGGGTTTGAACCCTGTAGATATGA
AAATCAGGAACGGCTACACATCGTCGATTTACGGTGAGATCGGCTTGGGGAGAGAGTACA
GTGGTGTTATCACTGAGGTAGGCGAGAACCTAAACTACGCCTGGCACGTGGGTGATGAAG
TATACGGTATATACTACCACCCTCATTTGGCCGTGGGATGTTTGCAAAGTTCAATCTTAG
TAGATCCAAAGGTGGACCCAATCCTTTTGAGACCAGAATCGGTTAGCGCCGAAGAAGCTG
CAGGCTCCTTATTCTGCCTGGCCACCGGCTATAATATTCTGAATAAATTATCCAAGAACA
AGTATTTGAAGCAAGATTCAAACGTTTTGATTAATGGTGGAACTTCGTCAGTGGGGATGT
TTGTCATACAATTATTGAAGCGTCATTACAAGTTACAGAAAAAACTAGTGATTGTAACGT
CTGCAAATGGGCCCCAAGTTTTACAGGAGAAATTTCCTGATCTGGCTGATGAAATGATTT
TCATCGATTACTTAACGTGTAGGGGTAAATCTAGTAAACCACTAAGAAAAATGCTCGAAG
AAAAGAAAATTTCTCAGTATGATCCGGTCGAGGATAAGGAAACTATACTTAACTATAATG
AGGGGAAGTTCGATGTTGTACTCGATTTTGTCGGTGGTTACGATATTTTGAGTCATTCTA
GTTCATTGATTCACGGCGGTGGTGCGTACGTAACCACTGTAGGTGATTACGTTGCCAATT
ATAAAGAAGACATTTTCGATTCATGGGATAACCCAAGTGCCAATGCAAGAAAAATGTTCG
GGTCTATTATCTGGTCATATAACTACACACATTACTATTTTGATCCGAATGCAAAGACGG
CTTCCGCCAATAATGATTGGATTGAGCAATGTGGCGACTTTTTGAAGAACGGTACTGTAA
AATGTGTCGTCGACAAAGTTTATGACTGGAAAGACCATAAAGAAGCATTTTCTTATATGG
CCACTCAACGTGCCCAAGGAAAGTTAATCATGAACGTCGAAAAATTCTAGATACCCACTT
ACATTTACAATATGTTTTATTTTTAAACTTAATGAACTTCATAATTTAATGCTTAATATT
TTCCCCCTCCCACCTTCTCCTGGCGTTCTCTGTACGTACATAACCATTTATTTTAATATA
TAATCAAATATTGTAACAATTGAAGCAGATGAGTCTCGCTCCTTAGTTAAGCACGTGCCG
ATGATATCAATTGGATTTGTTAGCAAATCAGCCTTGCTGCTCGATTCTCTGCTTTTTTTT
TACTTCTCGGTCATTGAAAAATCCTGACGAAAATATTTCAAGGTCCTATATGGTCATCGA
CCTTGAGCATGTGGTAGACTACATAATGCACATAGACTCTCAGCTTCAACTCCACAAGGC
TTCTCCAGCAAAAATGAATTCAGAGTCTCGAGAAGATATGGCTATAAATAGTATCAAATT
GCTAGCGGGAAACTCCCATCCTGATTTGGCTGAACAAATATCGAAAAAGTTAGGTATTCC
ACTTTCCAAAGTTGGTGTGTACCAGTATTCTAATAAAGAAACCTCTGTCACCATAGGTGA
GAGCCTTCGCGACGAAGATGTGTATATTATCCAAACTGGAATAGGTGAACAAGAAATTAA
TGATTTCTTGATGGAATTATTAATTTTAATTCATGCTTGCAAAATTGCATCTGCAAGAAA
GATCACTACTGTAATACCCAATTTTCCATATGCAAGACAAGACAAGAAAGATAAATCCCG
GGCGCCCATTACCGCAAAGTTGGTTGCCAATTTATTGCAAACTGCTGGTGCTGATCATGT
CATCACAATGGATCTCCATGCCTCCCAAATTCAAGGGTTTTTCCATATCCCGGTTGACAA
CCTATATGCAGAACCAAGTGTTTTAAATTATATTAGAACGAAAACAGATTTCGACAATGC
TATTTTGGTGTCGCCTGATGCAGGTGGTGCTAAGAGAGTAGCTGCTTTGGCTGACAAGTT
AGATTTAAATTTTGCTTTGATTCACAAAGAGAGGCAAAAAGCTAACGAGGTTTCAAAAAT
GGTGCTTGTTGGTGATGTTACCAATAAATCATGTTTATTAGTTGATGATATGGCGGATAC
TTGTGGTACGTTGGTAAAAGCTTGTGATACGTTGATGGAGCATGGTGCCAAAGAAGTTAT
AGCTATTGTTACACACGGTATTTTCTCCGGTTCAGCAAGAGAAAAGCTAAGAAATAGTAG
ATTGTCTAGAATTGTTTGCACAAATACCGTTCCGGTAGATTTGGATTTACCTATTGCTGA
CCAGATCGATATTAGTCCCACGTTCGCTGAAGCTATAAGAAGACTACACAATGGTGAATC
CGTGTCATATTTGTTCACCCATGCTCCAGTATAGGACAATTTTTTATTCTTAGATTCCTG
ATTGCTTGCATGCCTAAATACTTCATAATTGTATTAGTTTAAAAGAAAACCTTTTACTGA
GACAAAACTATAAATTTAAGAAAAAGGTTCCGGAGCCGGTTTAAAAAAAGAAGATTAAAG
ATATTATATTTATGTAAGAATTAAATTAATACTGTCAGAGAAAAAATAGTTTTAAAGGAG
ACGGTGAACCTTTACCTTCCTTGATATGCAAATATTTTTCAGCTTTTCCTAAAACTAAAC
ATTCTCGACTTTTTTTTAGAAGACTTTATGGGTGTGTTAGAAACAAAGCTGTCGTCTATA
GCAGTATCCAAATCGTCTGCTATAGGCAGCTCTTCCTTTTTCTTTTGACCACTATTGCAA
GTTCTTAGCCAATCATCGTACTTGATTAGATTGTCTATATTATCATCTTGTTCTTTTGCC
ATATTTTCACGATCATTCTTTTCAACAGCGTTTGAATACATCGCTTTATAAAACAAAACA
TATGCTGTTGCCATATTTGGAGATTCACCTGTGAATTCTAACACTGTTTCCTCTTTAACT
GCCTCTACCGTTTCGTCATCAAATAACAACCAGCCAAACTTTTCATGTTTACATAGGGAA
ACATAATGGCCGTGTTGTGGCCCACCGCCCATATGAACGACAATCCCAGCCAATTCATAC
TTTTGACAAACCTTAGAATTTATTGAAGAGCAAACATTTAGCGTCAGAGGATAGTGAATG
TTATTAAAAAGCTTAATATTACAGTTTTGTTTCTCAGAATACTTGAATCTTTTCAAGTGT
AATGTTAAAGTATCAGGCAATTGCTTCAAACCAACTAATCTCTCTGCCTCCTGTAAACCG
CAACATTCGTCACAATAAAACTTGTTTGAGCCATTTAGCATTTCTCGCTGGTGATAACTT
TTCAAAATTTCCTGTATATCTGTTTCCTCATCTCCCTGAACTTCTATGGGGAAATCCAAA
AATGGCTCATCCCTAGATGTAATGTTATCGCACGTCAGACATTTTATTTGATTCGTTAAA
GTGCCTTGAAACAAGTCACTGATGAAATTTTTACTCTTACTCGGTTCGCTATCGCTGTTG
ATATCACTGGCTGCTATTTTTTTATTCTCACGTTCTATATATTCACTCAACTCGTTTAAT
AAGAAATTGAAAAATTCGTGAGCATCCTGATGCATAGTAGTATTAAATAATACATTTTCT
CTTTTGAGAACATCAACAAAAGAGCTAGGCGATACAACACCAGTTAAATACGTATTCTCA
GTTATGCATTCAAAGATATCTCTCAAACTGGAATACAAAGTAGCCTTATCTGAGCCGTTT
AAGCTATGGTCAATATTGAGCACTGGCCCACGAATAAGTGCGGATTTCTTTCTATGTTCT
GGGGATATTTGAGAAGAGGAACTAGATCTTCTAGTATCTTTTTTATCAAGTGGAGTGGAT
AAGCTGCTATTACTTTCTCCTTTCAAGTCCAGGTTATTACTATTACTGCTACCTCTTGAA
GGATTTTCATAATTGAGAACTCTGCCAACAATTATTTTACGCGGAACATCCGGAGGTCTA
TCTGTGACGTTCTCGAAACTCAATCTGCTCGGAGCACCAGGCTCATTAGGTGTTTCGACT
ATCAATGGAGGTGCGTCTTGAGGACGAGAAGAGGGTTTTCCAGTGGTTAATATAGCAGGA
CTTCCTTCCTTTTTATTATTGTCTTGTACATGTTTCGCGCTAAAACTTTTAAAAAATTTA
CTCTTCTTCTCTGAAGGCCCAGCTGTATTTGAATTTACAGAATTTACAGGGGTAGGCTTT
CCATCATCAACAGATTGAGGTTTAGGGTTAGGCAAATGTCCATTGGTACCAGCAATGCTT
TTCTCAAAACTTGCTTCGGTAAATATTCTTGGTTTCTTACCTCTCATTTCTTTCTTTCTT
GGTTGATCAGATTCTCTTGATTTTTTTGGAAATTGCAATATATTTTCACGTAATGAGGAC
AGATTATAGAGACATTGAAGAACTGAGTTACAGTAACATGTATTGCCAAAATTTTCGTAT
CCAAAAACTTTGTTGGAGCCGTCTCCATAGGGCATTGAGTCGGACACCTTCATAGCTAAT
ATGGGTGCCTCGGGCCCTTGCGTGATAATGCCTCCGTATGCGTTTATAGCCTTTGCGTTT
GAAATATAAAATATCCCATCCTGGCTGTAATTACTGCCTTGATTGCACGTTTCAGAAGAA
TAGTCTAGTCCGGAAGAAATCTGCAAATTATTGTCTTCATTCAAAAAAGTTTCCTTGGTA
TCCAAATTAGAGACAAACAATGAGCTAGAGGGATTATCGGATGATTCGCTATAACAGAGT
TCATCATTTATATCGTGGTTTACAGGCTTAAAGTCAACCTTTTCTACTTCTTCTGTAATG
GTATCATTAACAGCCTTTTTCTTCTTCCCAGACTTACTTATAGTTAGCCATCTTCTGATC
ATGATTGCGCCCTTCTTGCGTGGGTTTAGTATGTTAATGAAAGTACTGGATCCTTACTAA
AGCCGAATTTGGCCCCTTCAACAAATAAAGCTTGATGAGTTGAACAGTCAAAGGGTAAGA
TCTGGTATAGGCAATAATAATATTATCCAAATGGAAAAAAAAAAAATGAACAGGTGAAAA
AAAATCAATTTGAAAACCAAAGAAAAACTCTATTGATTCCTTTGCTGTTGTCGACCTTCT
TTCACACAATAGTTCAATTACGTTCTTTGGGTTCTTTATCTTTATAGTTATCTTGCCTCA
TCTCTATGTTCAACACTTTCGGATCGATGTATTTTTCAGCCTTCCGCTAAAATTGACGAC
CGTCTCCAAACGAATAGGGATAAAGAAGCAAGGACTGAGCGTTGGAGAAAAAAAAAAAGT
TACCGGAATGGGAATAGATAGATACCTATAAGAAGCGTTATCGTTACTCATGAATTTTGG
TAAATGCACACGGATAAATGCATGATATATAAAATATTAATAAGAATAAAATAAATAGGT
AGTGAATAAATATTCTACTTTGGTGTGGTCATCATTTTACAAAGGAGGGAGGTCGTGATA
ACAAACTGATAAATAATCCTTAAGTTGATCCATTCTTGAATATTGTTACATTGGAAATAA
TCCGAAAAAGAATATGTATAAATAAAAGGACTCGAAGTCCTATGTAGCCGTCTTTGCAAA
TTTTCTTTAATAAATTAGCAGAAAACAAGGGTAATAATATTTCTTAGAATATTAGAAGAA
TATAGGCGTTAAAAACCTTGTTCCATGTTCATATCGAACCAACCAAAAAAGTCATCATTA
CTGGAGTTGCCTTCAATCCAGCCTGCACTTTGTTGCTGAAAAAAATCCGTTAGTTTGTTT
CCAGGAGTCTTCACGTTGTTTTCATTATCGATGGTTTGGAAGTTAGAAGAAGTTACAGTG
TTAGTGCCCGTAGAAAATCGTTGGTTCGTTTTGTTGCTATTGATATCATTACTTTTGGAA
AACAAGCTCAGAGGTGGATATGCCGTGCTTTTAGAGGAGCCGGGGTCGGAAACGACGGAA
TGCAAATCTGTCATATTATTTGACTTCGAAGCAATCGGTGTACGTGAATGGGACATACTA
CTTTGTGATCTTCCAATCGCGTTGGCGTTGCTGAATTGATTATTATAATTCATGGTGACA
TTTTGTAAATTACTGTGCTCCCTTGGAATAGGGTGGTCTATTCCCAATGTAACATTATTA
GATAAGTTGCCAACGGGGTGGTTCCTTAACCCTGGAACGGACGCAGGAAAATGATTAACG
GGAGTGCTTACTGATCTTTTCATGGAGAGATCAGGAATTACACTAGGTCCGTTACTATAA
TAGTCTACCTTAGTACTTTGTGGATTGTTATTCGAAGCGGGGACAGAAGCCACTGGATAA
ATTGAATTAGAGGGAATTGATATGTCATTAGACGCATCCAATAACGTCCTATTATTATTA
TAATCGTTACTATTCGAGGTATTAGCGAATAAACTTTGAAATTTTACGCTGCCTGTTTCC
CCGAGCATGGAAAGAGGTATCCCGTTAATCTCCATTATAGAACCGTCAGAATCTCCGTTA
TTTGTCTTGGCTAGCTTTTCTGCCTGCTTTAAGGCATTCTTAGTAGGAACTAAAGTGGTA
ACAGTGGTTCCACTTGGTGTTGTTTTTGTTACAGTTTCAAAGTCATCTCTGGAGATATGG
TTATATAGTGGCAATGGATATAGTTTTCTGTCCGTTATGCCACCCGTAGACGAAGTGCCA
TTGTAGATACCATTTGAGGAAAATTTTCTTTTCTTAGCGGCTTTCTCTAAGGCTTGCTTG
TTATATTCGGGATCCATTTCCCTTCTTCTCGCCTCGTGAACACACCAAACCAAATCATAG
AATAGAGACCCTGTTAAATGTGATCTCATCCTAGAAATAATACCGTCTTCTTCCACAAAA
ACTTCTGGATGCATGATCAGTACGAAGTTCAGTTTTTCTAACATACTTGCAGTTCTCGAA
ATATCATTCTCAACACTAGTGGCCCACGCAGTTAACTGATTTCTATAAAGTCTATGGATA
GTGACCACGGATTGCCTTGCTGAATCAAAATATTTGTCAGGAAGTAAAGGAGTCAACTGC
AATTTAAAGAGAATCAGTGCAGAAAATGTAGCAGCTTGTCTAATATAAATAGGCAGTTCA
ATTAATTGGTGTGTTTCTAAAAGATTATTCAATAGAGTGACAATTTTAGTAGCTGTTAGA
TAGGCCTCTGTGACATATGGAATTTGATCGGTAGGAGGTGTTTCGGGTAGGAATGCAAAA
CAACAGACAGTTAATTTAACATAAAGAAAATAAATGTTGACAGTATCGTCACTCTGGAAA
TTTAAAGTTTTTGCTAATAAATCTAACTCTTTTCCCAAGATGGACAGTGTCTCAGCACGA
TACTTTGGTTCCAATAAACCATCAGGACTGGAAGTGGAAGAACCAATGATATGAGACAAT
TTTGCTTGGAAATTCGCCAGGCTGAGCAATCTTCTAAAACTGCCCGGTAGTTTGTATTTA
CTTTCAACGTGCGGCTCGTCTTTCTTGTTCCTTTTATCATTGTTGTTATTGTCAATACTG
TCATTGTTATCTTCTTCTGATTCTTCGTCACCACAGGATAAGGCTTTTTCTAATAAATAG
TCTGTCTGTGAAGTTGGTGGCAAACCAAGGATACTCGCCCAACAAAGTTCGGCAAAAAAT
ATTCCCAGCCAAGTCCTAGTTCTCCACTTTTCTGCATTTGGCATTGATGTTTGAGTTCTT
GTGAATTCAGAAATGAATTCACCTCTGTGCAAACCTAATTGATAAGACAGTGACTTTGCT
AATCCTACAAAACGGTAAGAACAATCATCTAGGACTTTTTGGTTAGGCAAAGGCCAAATG
CACAATATTAACAAAGCTTGCGAAATATGTGTGGATCTAGGTGTTCTTATCCAGCAGGTC
TCTATGGCAAGTTGCTTGATCAAAGAGCTTAGCTTGCAATACATCGTCGGTTCAGGATCA
GACAGACATGCCGTCAACATCACGGTCCAGAAAAGCAACTGAGATTGGGAGTATAATTCG
GTGGCGTTATTGGAATACATAATAGGAAAATACGGCAGATACCTAGTCACGAAAATATGG
TGTAATCTATTCGCTTTTTCAATGGAAATACTAATATCGCCCAGTACAAACTCATCTACA
TTTGCATGCGGCGAAGGCAATAATGGCATAGTCGTGGTGGTGGCTACTACCGGCGTCTTC
GTCCTATCTGCATTGTTATTTGTTGCTACGTGGCTTGTTGCTGCAAATGGTGGTTGATTT
GTTGTCGTTGTAACGGTGGTCGACGTAGTATGAGGGGAATATGTTTTTTGAATTGGAGAG
AAGGGGCCGTTCGGAGTGTTACCTGCAGAGTTGTTCTTATAAAAAGCCATTTGCAAAGCA
GGAGGTAAAGATTCTTTTGAATTATTAGGCAATGCTGAGTCATTTAGCAGCGGGGGCAGC
TTATTTGGCTCTGTTGCAACCAAGCCTTTCGAATCTTGCGCTAAAGAAGATGCGCGCAAC
GTCATGTGAGAAGATGCTTCATTATTTGCTTTAAATTTATTCGTATTGCTGCCCTGATTT
GCTTGTAAGAGTTGGGGTTCCCTGGACAAATAAGTTTGAACTGAAACCTTAGAATCTCGT
TGAGCCGCGGAAGAAGTTGGAGAACCTGAGGAAGGAGAAGAATCTGGGTTAGGGATAATA
GTACCCGGAGTTGGAGTTGGATGCAGATTGAGCTTATTCAAAAGGCTATTGCCCATGGGA
ATCTGTTGTAAAAGATGAACGAAAACGCTGTCATTGGCCAGAAGAGTATCGAGTTTAGAT
TTGATTTCATCCACATCTTGTCTCAGTAGTTGCAACTGTGAGCCCTTCTTAGGCCTGAAT
TGAGGATTGATTTCACAGTGGAGACCAATTTTTTCGCATCTGGAGCAAGGATGAGGGAAA
TTTTGACTAGCATCGCATTTGATTTTGTGCTGTCTACAATGTGTACATGAGGTAACTGGT
CTATGGTTGATTTGATGACTGTCATCATGGTGAGATATTCGTTGTTTCTTACTTGGGAAC
TGGTGCTGTTGCAACTGTTGCTGCTCCGGTTGTCTTTTCATGTGAGCAGAACTAAAATCT
TGGTCTTGGTCAGAATCTCGATTATCCTTCACCATGACGAGAATGCGTATACGCAGAGCC
AATATAATCTGTATACGGGACCTTTGACATTAAGGTTTCTGCAGAGAGTTTATTACATGC
ATTTTCATATATATATTTTTAACGCCATTCCTTTACGGTATGTAAAGAAAAATGATCCAA
TGAGCGGCCCTTCGTACGAGATGAGATATAATAAGAATGAAAGATAGATAAAAGTTTTAG
TTAGAGATACTTCATATACCTGTATATAGTAAAGTCGTTTATTTCAAAGCTTATTTCGAC
TTGGTGAATCTTAAATAGGGTTTAATTTCATTAAATTGACCAAATTTAGCCTTCGCCTCA
TCATTGGAGACAGAGGGAGGAATAATGACATCGTCAGCTGGCTGCCAATTAATTGGAGTT
ACTACGCCCTCCTTGTCAGTCAATTGCAAGGCGTCGATTACCCTTAACACTTCAGAAGTG
TTTCTTCCGACGGTGGAAGGGTAGGTAAAAATCAGTCTAATCTTCTTCTTGGGATCGATG
ACGAAAACAGACCTCACGGTCTTCAGTGACCCATCATTGATATTTTTGAATCCTTCGGCA
TCTACCATATCATATAGGAATGCCACGTTTCTAAAAGTGTCACCAATTATTGGGAAACCA
ACATTTTTAACCTTTGCTATTTCCTTGATGTCTTGAATCCATTTTTCGTGGGACTCAACA
TCTTCCACTGAAAGCCCGATCAATTTAACATTTCTCTTGTCGAATTCCGGCTTCAATTTG
GCGAATGCGCTGACTTCGGTGGTGCAGACAGGGGTGAAATCTGCTGGGTGAGAAAACAAG
ACCCCCCAAGAGTCGCCCAAGTAGTCGTAAAAATTGATTTTACCAACCGTTGTGTCAGCA
TCAAAGTTAGGAGCATCAGAGTTTATTCTTAGTCTTGGTTGATCACTTTGTTTGAATTGT
TTGCACAGAATAGGTGCTGTGGCAAATGTTTTAATCGTCTGTGATTGCAAGTGAGCCTGC
TTAGGAAGGGTCCATGCCGTCCTCTTTAATTGAGCGCTACAAATTCTACTAAACATCCTT
TGCTTCCTGCTTCTTTGAAATTTATCTCATCCTACTGCGAGAATCTAGAAGCACAATTTT
CTATATCTCTCCTTCTCTCTTTATATACCAATAGCAGCAACATCCGGCCCCTTGTTTCTT
TACGTAATTAAAAATCTCCGGGGCTAGCTTTTGCCGGGGAACCCATCCCGAAAAAATTGC
AAAAAAAAAAATAGCCGCCGACCGTTGGTCGCTATTCACGGAATGATAGAAAAATAGCCG
CGCTGCTCGTCCTGGGTGACCTTTTGTATATTGTATAAAGATAAACATAGTGCTATCAGG
AATATCTTTATATACACACGCATACTGAATGTGGTTGAAGTTCAAAAAATATCACAAACG
TTAAGAAGTTTTACTGGTAAACATATAGACATAGTGGAGCGCTTGCTCGAGGTCAAATGC
AGACGGATACGAGAGCGCGGGAGGGAAACCGGAGAAGGTCAATATGCCCATAATTCTTCT
TCTTTGAGGTTGGCAATTATATATTGTATCTGAATTAGGCAAATAGAAAAGAGACCTTAC
CATTAGCGCCATCGTAGAGTCCCATTTCACCTTTTCTTAGTTCTTTATATATGTCTGCGT
ATGGCCCACATATGCGCGCACAGTGCGCGCCACCCTCTAAGAACGATAAACATAAAATAA
ACACATAAACAATCAACGACAGTTCGCGCTTCCCTCACTAAATATGGCGAGATAGTTAAA
CAATCATGGCTCGTTCTTCCTTGCCCAACCGCCGCACCGCCCAGTTCGAAGCGAACAAGA
GGAGGACCATTGCACATGCTCCATCTCCAAGTCTTTCAAATGGGATGCACACTCTAACGC
CGCCCACCTGTAACAATGGTGCTGCCACTTCAGACTCCAATATACATGTATATGTAAGGT
GCAGATCGCGTAATAAGCGAGAAATAGAGGAAAAAAGTAGTGTAGTTATATCTACACTAG
GCCCACAAGGGAAAGAAATCATTCTGTCCAACGGTTCTCACCAATCGTATTCGTCCTCGA
AGAAAACTTACCAATTTGATCAGGTGTTCGGCGCAGAATCTGACCAGGAAACAGTGTTTA
ATGCCACTGCAAAAAACTACATTAAGGAAATGTTGCACGGGTACAATTGTACAATATTTG
CATACGGTCAAACGGGAACAGGTAAAACCTACACTATGTCTGGCGATATAAATATTCTCG
GTGATGTGCAATCTACCGATAATCTATTATTAGGAGAGCATGCAGGTATCATACCACGGG
TTCTGGTCGATTTGTTTAAAGAATTGAGCTCCTTAAATAAAGAGTACTCCGTAAAAATAT
CCTTTTTAGAGTTGTACAATGAAAATTTGAAAGATCTGCTCTCTGATAGTGAGGACGATG
ATCCTGCAGTCAACGATCCCAAGAGGCAGATTCGTATTTTTGACAATAACAACAATAATT
CATCCATCATGGTCAAGGGGATGCAGGAAATCTTTATTAACTCTGCACACGAAGGCTTGA
ATTTGCTAATGCAGGGTTCGTTAAAAAGGAAAGTGGCCGCTACTAAATGCAACGATCTTT
CATCAAGGTCTCACACCGTCTTTACAATCACAACAAACATAGTTGAGCAAGATAGCAAAG
ACCATGGACAAAACAAAAATTTTGTTAAAATTGGCAAATTGAATTTGGTGGATTTGGCAG
GCAGTGAAAACATCAACAGATCGGGTGCGGAGAATAAAAGGGCTCAAGAAGCTGGCCTAA
TAAACAAATCGCTGCTAACACTAGGCCGTGTTATCAACGCACTCGTTGATCATTCTAACC
ATATACCTTACAGAGAATCTAAGCTAACAAGATTGCTACAAGACTCTTTAGGTGGTATGA
CGAAAACATGCATTATCGCAACTATATCACCTGCGAAAATATCCATGGAAGAGACTGCAA
GTACGCTAGAATATGCAACGAGAGCCAAATCAATTAAGAATACTCCACAAGTAAATCAGT
CTTTATCGAAGGATACATGTCTCAAAGACTACATTCAAGAGATTGAAAAATTAAGAAATG
ATTTGAAAAATTCAAGAAACAAACAAGGTATATTTATAACTCAAGATCAGTTGGACCTTT
ACGAGAGCAATTCTATCTTGATTGATGAGCAAAATCTAAAAATACATAACCTGCGAGAAC
AAATTAAAAAATTCAAAGAAAACTACCTGAACCAATTAGATATCAATAATCTTTTACAGT
CTGAAAAGGAAAAACTAATTGCCATAATACAGAATTTTAATGTCGATTTTTCTAACTTTT
ACTCGGAAATCCAAAAAATTCACCATACTAATCTCGAACTAATGAATGAAGTCATACAAC
AGAGAGATTTTTCACTAGAAAATTCTCAAAAACAGTATAATACGAACCAGAACATGCAAT
TAAAAATCTCTCAACAAGTTTTACAGACTTTGAACACTTTACAGGGCTCTTTAAATAATT
ATAACTCTAAATGTTCCGAAGTTATCAAAGGCGTCACCGAAGAACTAACCAGGAACGTAA
ATACCCATAAGGCGAAACACGATTCTACTCTCAAATCGTTATTAAACATTACTACTAACT
TATTGATGAATCAGATGAACGAACTGGTGCGTAGTATTTCGACTTCATTGGAAATATTTC
AGAGTGATTCTACTTCTCACTATCGTAAAGATTTGAATGAAATCTACCAATCACATCAAC
AATTTCTAAAAAATTTACAAAACGATATTAAAAGCTGTCTTGATTCGATAGGCAGTTCAA
TTCTAACTTCCATAAACGAAATATCGCAAAATTGCACCACTAACTTGAATAGTATGAATG
TTTTAATAGAAAACCAGCAGTCAGGATCATCGAAATTAATTAAAGAGCAAGATTTAGAAA
TAAAAAAACTGAAAAACGATCTGATCAATGAGCGCAGGATTTCTAACCAATTCAACCAAC
AGTTGGCTGAAATGAAGCGATATTTTCAGGATCACGTTTCCAGGACGCGTAGTGAATTCC
ACGACGAACTTAACAAATGTATCGATAACCTAAAAGATAAACAATCTAAGTTGGATCAAG
ATATCTGGCAGAAGACGGCCTCTATTTTCAACGAAACAGATATCGTAGTTAATAAAATTC
ATTCCGACTCAATAGCATCCCTCGCTCATAATGCTGAAAACACTTTGAAAACGGTTTCTC
AGAACAATGAAAGCTTTACTAACGATTTAATCAGTCTATCACGCGGAATGAACATGGACA
TATCCTCCAAACTGAGAAGTTTGCCCATCAATGAATTTTTAAACAAGATATCACAAACCA
TTTGTGAAACCTGTGGCGATGATAACACAATCGCATCAAATCCAGTATTGACCTCTATTA
AAAAATTTCAAAATATAATTTGTTCAGACATTGCCCTAACAAATGAGAAGATCATGTCAT
TAATAGATGAAATACAATCACAAATTGAAACCATATCTAATGAAAACAATATCAATTTGA
TTGCAATAAATGAAAATTTTAATTCTTTGTGCAATTTTATATTAACTGATTACGATGAGA
ATATTATGCAAATCTCAAAAACACAAGATGAGGTGCTTTCTGAACATTGCGAGAAGCTAC
AATCACTGAAAATACTGGGTATGGACATTTTCACTGCTCACAGCATAGAAAAACCCCTTC
ATGAGCATACAAGACCTGAAGCGTCAGTAATCAAGGCTTTACCCTTATTGGATTATCCAA
AACAATTTCAGATTTATAGGGATGCTGAAAATAAGAGCAAAGACGACACATCTAATTCTC
GTACTTGTATACCAAACTTGTCAACTAATGAAAATTTTCCTCTTTCACAATTCAGTCCAA
AAACCCCAGTGCCAGTGCCTGATCAACCTCTACCAAAAGTTCTTATACCGAAAAGCATAA
ACTCGGCCAAGTCCAATAGATCAAAGACCTTACCAAATACAGAGGGTACTGGACGAGAAT
CGCAGAACAATTTGAAGAGAAGATTTACCACCGAGCCAATATTGAAGGGAGAAGAAACTG
AAAATAATGACATACTGCAAAATAAAAAACTTCATCAATAAGGGGATATAGCCATTGTAA
AATATTTGTATCACTATATGCATTGAGTGTAAACTGTTGCACCTATAAAGAATGAAAACA
ATCTAGTATGTGTACTTACATAATTACACAGTCTTTTTTTTTTTTACCTTGTTTATCCTT
CTTGTTCTTCAAGCTTGTAGGTTTTTTTGACTCAGTTTTTACTGCAGGAAAATCTTTACG
AATCATGTTTGAACTGCCCATATTTGATAAACTAACTTCTTGCTTTGCTGCCATCGACTG
CTCAGCAACTTCCCTTGACATTCCCTTTGCTGAGGAAGAACTTTTCCTGATGCTTGTATC
AGAACCCGTTTTAATACCATTTCTATTCGTGTTTGAATTCATGTTAATTTGCAAACCTTG
TGGCTCACGATCACGTTTTGGATTTCCAGTAAAGAATGTTTCAGATTTTGAAGAAACTCT
TGAATTTGACCCTACGTTACTTGTTTGACTGTCCACAGTAGAGAATAAATTCAAAGTACT
GATACTTTTATTTTTTTTATGCTGTTTTTTACCAATGCTGGCTAGTCCACCGTCCCTTGA
GCGTAGCTTATTAATCGCCCTCTTGTCCTCGTTCCCTGCAGCTTTCTCGTACCATTTCCA
TGCGTATTCCATGTTACGATCACAGCCCTTGCCATGCTCATAGAAGTAGCCCAGAGTGAA
TTGGGCCTTTGGCAAACCAGCATTAGCTGCACGCAAGGCCCATTGAAAAGCCTCATTTTC
ATCTTTTTCAAAAGCAGGTTCTGCTCCCAGTAAGTACCATGCACATAAACCTAACATTGC
CACAGAATCGCCTTTTAACGCTGCCTGCGTATAATAGTGTACAGAAAGTGATGTATCCTG
CCCTACTGTATCATTACCTGTTTCATAAATCTGTGCCAACAAAGTTGCTGAAGGAACATG
CCCTAAACTTGCTGCTTGAATATATAGTTCCATTGCATACTTTTCATCCGGAATGACAAC
ATCTAAGAACCCTTCATGATAAATCTTAGCCAATTCGTATGGTGCTGCGGCCGTCAACTC
ATTAGCTCTTGCTGCAGCCCTTGATAACCATTTTACCCCATTTAATTTAGTATTAACGTC
GGTTGGAAGACCCATTCTGCCGTAGAATGAATAAAGTCCCAATTTATACATTGCTGAGGG
ATGATTCCTGCTAGCCGCAAACTTTAAAAAATTGACTGACTTACGAGAATCTCTTGTTGT
TCCTAGTCCTTCTTCTAAGCAATGCGATGCTCTGTAAGCACTTTCTATATGACCATGCTT
TGCAGCTGCTTGAAATAAGACAAATGCTTCTTTATTTTCAATCTTCCCAAATGCTCCGGA
TGAGTAGCCGTCCGCTAATAAGTATTGGGCATCTGAATAACCCTTTATGCTCAGTTTCTT
CAAATAACTTTGCGCTTCTTTCAAAAACTGAAGTTTTAAGTCAGATTGGCTGACATTTCC
TTCCTTGTCACTATCTTGAACAAGAGCATTGGAAGATTCAATAGTCAGTGCGGTTTGTAA
CATATATTGCGCATACTGGAATAACACTTCAGGATCTTTAGATTTTTTAACGTTTTGTCT
ATACATTTCTATTGTTTTTAGCCTTGGAACTAAGGAAGTATTATTTTTACCACCCAAATA
TCGACTGATCATCTGATGTGACAAATCTGCTACAGATTCATTAGTAGCCGTTAATTGGGT
ATCACTGCTACCATTCAACAGGTACATGTGAGACAAATCTACAGAACGAGTTCTTTTCTT
TATTTGCTCCTTCGTAAGAGATGTACTCGAATTTGTCTGTCTTAATGCTCCCGGTGACGG
AGAATTTGTAGGAGTACTTCCCAAAGAACTTAAGGAAGTATTATTTGAATTATTAAGATG
AAGCTGTGGGGGTGGGACTGGAACGAAATCTTCCTCTTGACTATTGCCTATATCGTTTGA
TAGTAGAGGTACTGACGCAGCTCTAAGATGCTCATTGATAAGCGGTTGGTTTGCCGACCG
CTTAGGAAGGTCTGCGGTACTGAAGTCTTCATTGTCCCTGTTTTCCCTATTCTCTTTATT
ATCTGAAAAATCTTGACCTACCTTCAACGAACTGTTTTGAAACTGTAGGCCCCTGTTATC
AAAATTTATATGCTGTGATTGCATTAAATGCTTCTTATATGGATGTACCTGCGGTGAACT
TGCCATTTTTTATCCTTTTATTTTAACTTTATCACCAAAAAAGACGAGAACCTGGTAGTA
TACAATGGAAGGCTTATTAACAGCAAGTCTAAAGTCAAGTGCCAACACCTAGTTTGTCTC
TACTCTTAAATCTTACATCATCCTCGAGAGGGTCTGCAGAAAGAATTTTTCGTTCTTTTT
TTAGCAAGTCAAAACGCGAAGTGAAACGTGGGAAAATATAACGATGACCTTTCTTAAAAC
ATGCATGAAGACTCGTGAAAGTCATATGTACATATGTCGTATAGATTTGCAGATAGTTGC
AACAAATAATTAGCGATTAGTTATGGCCTATACATGGCAGCTAAGTGCGATGGCATGTTC
AAATGTATTATATTAAATCAAATGAACTTAAAATGCGATGTTTGGGTGCAAAATATCTAT
AGATGATAGAGACGGTTCATTGATCTTACGGATCAACTTTGAGATCAGTAAGGCTGACTA
GATGGTACAATTTTGTGCAGTCAATGGACTATTAAGGGATCGCAAAGAGGTATGTGCGCC
AGTTTAAACGAGGTAAAAAAGAATGACACCTATGGGGTCTCACAAAAGGGCTACAATGAC
AATTTCAGTGAAAGTGAGGGCGTCCTTCATGGTAGTAAGTCGATGCCCACTAGCATGAAA
AATATGCTACAGTCTCCCACGATGGTCAACATGTGTGATATTTTACAAAACAAGGAAGCT
GCTAATGACGAAAAACCTGTGATACCTACTACGGATACCGCCACTGCGGGGACTGGTACT
GAAGATATTAGCTCCACTCAATCCGAGGAAACTGATCAGAATAGTCATCTTATTGCCTCA
GAGATCTTGGAAGGCACTTTCAAAGATGTATCTTACAAGGAATATGCAAATTTCTTGGGA
AACGATAACAATAATCAAGTCTTGACTGAGTTTGTAAAGTTATTGAGTCCTTTGCCGTCG
TCACTATTAGAAACGCTTTTCAATTTATCGAAAAGTATATATTTCATTGCAGAAGCGCAA
AATATCGACCGGATACTAGAGTGCTTGAGCATAGAATGGATAGCTTGCCACCCGAACACA
CATTGGAAGTCAGGCTATAAGTCATGTCATATAGTCTTATTTTCCCTGTTGATCCTTAAT
TCGGATTTGCACAACAACTTTCAAGTTGACCATAAAAAGATTAAGTTTTCCATGGTTGCA
TTTATCAACAATACACTGAGGGCACTAAGAGAGGAAAATGAATACGAAGAATTGAAAATA
TACTCCCGCGAACATTTGATCATCGAAGAACTTTCCGAATACTATAAAACGTTAAATGAA
ACGCCTTTACCGTTATGCACAGAATCTAGAACATCAATAAATATATCAGATAACCAATCT
TCCTTGAAAAGGTTCTCTACTCTAGGATCACGGGAATTTAGTACATCAAATTTACGTAGT
GTTAACTCTAATTCTACTACACTATATTCAAGAGATGGTCAAGTATCTGTACGAGAAATG
AGCGCAAAATCAAATAAAAACTTTCACAATAATCACCCCATGGATGCACTCTACCTTAAA
GAGTCTTTTGATGACGGTTTAATTACCGAAAACGGCTCCAGTTGGTTCATGGACGATTTA
ATTCTTATAAGCAAGAAATCTTTACCACGTAAATATTCTAAAAGAGACAAAGATCAAGTG
GCGGCACCAAAAATGACCTCTAAGAGAAACAAATCGTTCTTCGGATGGCTAAAACCATCT
AAAACGACTACACTTATTGAGCACACATCTAGAAGGACTTCTTTATCGTATTTGAATAAG
GATTCTGAATGGGAGAGGGTGAAAATACAGGTCAAGGAGGGCAGAATTTTTATTTTCAAA
ATTAAACCAGATGTTAAGGATATCATCCAATCAAGTGAAACAGACAGTGCTACCATCGAC
TATTTCAAAGATATCAGTAGCTCTTATTTTGCTTACTCACTGCTTGAAGCTGAAGCACAT
GTCGTGCAAGATAATATAATTATAGGTAGTGGAGCAATGAAATCAAATGTGTGTAACAAA
AACACCAAGAGGAAAAGTGGCAACTTTACCGTTAGTTTTCCAGAGAATATCAACGGACCA
AAGCTTGTTCTGGAGTTCCAGACGAGAAGTGTTGAAGAAGCCCACAAGTTTATGGACTGT
ATCAACTTCTGGGCAGGTAGGATTTCTCCAGTTCCTTTAACACAATTCGAAGCCGTATCT
AACGCAGAATATGGATGGAGTGACAAGATCTTGACAGAGCACGCTTCCCTCAATCTTAAA
AATATTGTTGTAAGTGAATGGAAGCCACTATTGGGGCTAGAGCTACTATACGAAGATGCG
AAAGATGTAGAGATGGTCGAACTAAAAGAAAGGCTAAAGGAATTGATGAACTTCACCAGA
CAGCTTGGTATATGGATAGATAAACATAACGAAATAAAGGATAAGCTGGTCGAAATTTGG
AGCTTTGACGATAACTATTTTGAAGCAGTCATGAATAATTGGAATTCGAGATATTTGTAT
ATGAATAATCAATATAAGAAACGACTGAGCTACTTGAAAGCTTTGCAAAAAGCCATGGGT
TCTGTTCAGTTCTAAGTATATTTAAAGATATAAATATAAAGACTGCGCTGAAGAAATATA
AACTTGAAAACTGTACTCTGCCTTTTATTTACAAGGGATATTGAGATGATTTGTGTGAAT
GAAGTAGCGACAGAAAAAAAGCTTTTATTTCGAGTTCGCATCATTGTCACTTTCCTGCTT
TTTCTTGGCGTACTGTCTATCTAAGATAGTCTTTAATATAGCGTCCTCGCCATATTCTTC
TTCCTCAATTTTCTTCCATCTCTTTTCTACATCAGCTCTCTTTATTCTACTTTCAATGAC
AGCACGTTTCTTGTTATTCAAACTTGCCTCCTTGAGACACTTGTTCAAAGCATCCTTTTC
GTTGTTACAAAGGCCAAATATTCTCTTGTAATATTCCTTTTGATGGCATTTATCGAGTGC
ATTGATGAAGTCCAAACAGGCTAAAATGAAGAAGGGGAGAATACAATGTTAGTAAGTCGG
AGCACAGAAAAAGGCAAATATATGAAGTAAAATCTGGATACTTACAATGAAAACGTTCAG
CTTCTAACTGTGGATGCATGTTGTAGTACTTGTCTTATCTTGCTTTTGTTCAACTGCACT
TGTAAATCAGTGAATGTTATTGGACGCGCAGCGATTTTTTAATAGGTCTTTCTCTATTAA
TGTAATATGCGAATTGAAACATAATGTAAACACAAGAAGAAAATTCGAAATAAAGGACTG
GCCAACAATAATGTTAGTGAGCAGAAACGACAAGCCCAAAATCAGTAGTGAGGAAGTCAC
ACATTTTATAGACGACTATAAAAAGAGGAGGAAAACTCAGATGACACGATTCTTCGGAAT
CACTATTTTTACACTTATAACATGTAGAATTGCCATGAAGAAAATGATAACTGCAAAAGG
TATGCATAGGCAATAACTTCGGCCTCATACTCAAAGAACACGTTTACTAACATAACTTAT
TTACATAGTGCCATTGAACACTTTTCAAGCAAACTACGCCAGCCGGACGCAGACAATAAC
ACACACACAAAAGAGTCTTGCAGGTTCTCTTTTAGCGGCAACGGGCATGACACTAGGTAT
ATTTGGTATGGGCATCACAGGGACATGTTGGAGCTGGGATGTTTCATCATTTCAGGAACT
AAAGCAACGTCTGGAAAGGCGTGCCAACAACGAATTTGTAGTGACAAACATGCCTCTGGA
TAAAAGAAGCCAGCAAGTAGTGGACAGCTTAGTTAAGACACACAATTCATCTCTTTGTAA
ATAGTGTTATACCATAGTAGTAGTTTCAATAATATATTCCACTACTTATATGTGTTACCC
GCATTAGAACTCTTATTGGTGGCGAAAATCGATGGCAATAAAGAACGGAAGGGGTTTAAT
AGTTGTATGCTTAACATATTTCGATTTAAATATATAAGAAACGTCGGTAGCACAACAATT
AACTCATTATTTAGGTATGGCGGAAATACCTGATGAAACCATCCAGCAGTTCATGGCATT
GACCAATGTGTCGCATAACATAGCCGTTCAATATCTCTCTGAATTTGGAGATTTAAATGA
AGCACTAAATTCCTATTATGCTTCTCAAACGGATGACCAAAAGGATAGAAGAGAGGAAGC
ACATTGGAACAGACAGCAGGAGAAGGCCCTCAAGCAAGAAGCCTTCTCCACCAACTCTTC
GAATAAAGCCATAAATACGGAGCACGTTGGTGGGTTATGTCCAAAACCAGGATCCTCACA
AGGTAGCAACGAGTACTTGAAAAGGAAAGGTTCTACCTCTCCTGAACCAACCAAGGGTAG
TAGCCGCTCTGGAAGTGGTAACAACTCCAGGTTTATGAGCTTTTCGGATATGGTAAGAGG
TCAAGCTGATGATGACGATGAAGATCAACCGAGAAATACTTTTGCTGGTGGTGAAACATC
CGGCTTAGAGGTTACAGATCCTTCAGATCCTAATTCATTACTGAAGGATTTGCTGGAAAA
AGCGAGAAGGGGTGGTCAAATGGGCGCTGAAAACGGATTCCGTGATGACGAAGACCATGA
AATGGGTGCCAATAGGTTTACTGGAAGAGGTTTTAGATTAGGGTCAACCATCGACGCAGC
AGATGAAGTCGTAGAAGACAACACTTCACAATCACAACGTAGACCAGAAAAAGTCACAAG
AGAAATTACATTTTGGAAGGAAGGTTTTCAAGTGGCCGATGGTCCGCTTTATCGCTATGA
TGATCCTGCGAACAGTTTCTATTTGAGCGAGTTAAATCAAGGGAGGGCTCCATTAAAGCT
CTTAGATGTGCAATTTGGACAAGAAGTTGAAGTTAATGTATATAAAAAATTAGATGAGTC
TTATAAAGCTCCGACGAGAAAACTGGGCGGTTTTTCAGGCCAGGGCCAAAGACTAGGATC
TCCTATCCCGGGTGAATCGTCACCTGCGGAGGTTCCAAAGAATGAGACACCCGCTGCTCA
GGAACAACCCATGCCGGACAATGAGCCAAAACAAGGCGACACCTCCATCCAAATTAGATA
CGCAAATGGCAAAAGAGAAGTTTTGCACTGCAATTCCACAGATACAGTAAAGTTTTTGTA
TGAGCATGTGACATCAAATGCGAACACTGACCCATCGAGGAATTTCACCTTGAATTATGC
CTTTCCTATCAAACCAATAAGCAACGATGAGACAACATTGAAGGACGCTGATCTGCTGAA
CTCCGTTGTCGTGCAAAGATGGGCATGAGCATAAATATACAAAAACAGAAACGGGAAAAG
ACTTCAACTTAATATATAAATGCACGTATATCTATACCCGTAGTATATATCATTTGTACC
TCAATACAATTTCAAATCACCTGTTATTTGATCCAATACTGCTTTTGGAGCAGGTCCTAA
ACCCAATACGGTGGCACTTCCCGCAGCAATCTGTGTTCTACCAGCATCATGAATAACTGC
TGCATTCACCCCAAGTGATATAGCCTTCGCATACAACTCGTCCATTGTAAACTTATCTGG
ACATTTCAACGTTATTTTAGCCTGTCCAGCATTTAGCCATCTTTGTGTCATAATTGGGTT
GTATGAAGCACGCGCGGGGTTTGTAGCAATATGTCTAAAACATGACAATGCTGCGTGACA
GCATTGTGCCGCTATTTTGCCCTTTGTCATGCCAAGATCTTGACGAATCACCAATGCCAT
CCTAACTTCTCCAGGTATATCATTCAATGAAGTGGACTCAATATCTTCGTCCTCATCGCT
CTCATCTTCGCTTTCACTTTCCTCCTCATCAGTGTCATTGTGTAGCTTTCCTTCCTTCAT
TTCTTTAGAACGCAGTAAAGTAGCTGAGGATTTCTTAGTTGATGATGCGTTCGACGTACC
CAACTGGTAACCCACGGCAAAGGAGATTGCGGTGAAAGTAGCCCATAAAGCTATGGTGTA
ATTCGAAGAAACTGTCATCTTTTCCATTAAAAAGACGTTATCATGTTACTCCGCTGTCAA
CAAGTAATATAGCAAGAAACAATTAGCTCTTATGCTTAAGAGCTTCTAGAAGAGTAGTAA
TAACCTTTAAACATTATTTTCGTCAGGCGTGATATCAGCGAGTTGAAGAAAAAACAACAT
GGGTTGTCCCTCAAGAGAATAAACTCAAAGGAGTAAAAGGTGTTTAGAGCTTGTTGGCTC
GATTGTTGCCACCGGAAGGCCCCTTTCTGTTTTTAGACTATATTCATTTTACTTTTTGAA
GTTTCTATTATAGGCAGACGAAGAAGGCCAAGAAGACAAATCGAAGAAAGAGAGAGATAA
CATGGGTCAAATATTGTCCAATCCAATTATCGACAAAGAGCATCATTCTGGTACGGACTG
TTTGACAGCGTTTGGACTATGTGCCATGCAAGGCTGGCGTATGTCCATGGAAGATGCCCA
TATTGTTGAGCCGAACCTTTTGGCTGAGTCTGACGAGGAACATCTCGCATTTTATGGTAT
ATTTGACGGTCATGGTGGTTCTTCTGTAGCGGAGTTTTGTGGCTCTAAAATGATATCTAT
ACTGAAAAAACAGGAGAGCTTCAAGAGCGGTATGTTAGAGCAGTGCTTAATAGATACCTT
TTTAGCTACAGATGTTGAGTTGTTGAAAGATGAAAAATTAAAAGATGACCATAGTGGTTG
TACAGCAACTGTGATATTGGTATCTCAATTGAAAAAGCTACTAATTTGCGCCAATTCCGG
TGATAGTAGAACAGTTCTATCTACTGGTGGTAATAGTAAAGCAATGTCATTTGATCATAA
GCCCACATTGTTAAGTGAAAAATCTCGTATTGTAGCTGCTGATGGTTTTGTTGAGATGGA
CCGTGTTAATGGAAATTTAGCGTTATCAAGAGCCATAGGTGATTTTGAATTCAAATCTAA
CACAAAATTGGGACCTCATGAGCAAGTCGTTACATGTGTTCCTGATATCATTTGTCACAA
TTTGAATTATGATGAGGATGAATTTGTTATTTTAGCATGTGATGGTATTTGGGATTGTTT
AACTTCTCAAGAGTGTGTTGACTTGGTTCACTACGGTATAAGTCAAGGTAATATGACGTT
GAGCGACATTTCATCTAGAATCGTAGATGTTTGTTGTTCACCCACAACTGAAGGCTCAGG
AATTGGCTGTGATAATATGAGTATTTCCATTGTTGCTTTACTAAAGGAAAATGAATCTGA
GTCACAATGGTTTGAGCGTATGAGATCAAAAAATTACAATATCCAAACGTCTTTTGTCCA
AAGAAGGAAAAGTATTTTTGATTTCCATGATTTTTCGGATGATGATAACGAAGTGTTCGC
AATAACCACCAAAAAATTACAAGACCGCTTGAATCGTAGTAAAGATAATGACGACATGGA
AATTGATGATCTTGATACCGAATTAGGCAGCAGTGCTACTCCCTCAAAGTTATCAGGTGA
GGATAGAACTGGCCCTATTGACTTGTTTTCGTTGGAGGCTCTATTAGAAGCCGGGATTCA
AATAAGGCAGAGGCCCAGCTCCGACAGTGACGGCAACACTTCTTATTTCCATGGTGCTTC
TTTATCAGATATGTTGGCATCTTTAAGCAATGCGGCTGCAGGAGAAACAGAACCTAATGA
TGCTGATGATAACGATGATAACGACGGCGAAGAAAACGGCAAGAATGAAAATGCGAAGAA
GGGTTCCAAGATTGAAGAAATTGAATAATAAATATTGTCGAACCGTACTTTGCAACGAAA
GAGTAGTCAAACTTTGTTATCTTTATTTGTTATTCCTCTTCTGCCGATGGATTGTTTTTT
ACTGGATCATCTTTGCGGCCCATATTGAGGAGATGGTGAAATTCATAAAAATCATTACGA
GAGAATGATAAATTGTAACAGAATTTATAAATCCTATTCATATAGATACATCTGTTTTTC
CTTACTCTGTTTTTATTTTGTTGGTAACCTTTGAATCCTTTTTGATGAAAAAAATAGAAA
AAAAAAAAAAAAAAAAATGAAAGCAATATCGACTGTATGTATATGCGCACCATAATTTTC
CTATTAATAGTTTAAGCATAATTAGTGTACTTACTAAAAATAATGTAACTTTGCTCTTTG
CACCAATAGATGTTACTCTCCAAATATCTTACAGGTCGTCTTCCACGTGGTATCTATCAA
AGTAGCCAGATCCACGTCCTTGACTTCCGATACGACAATTGCTACTTGTTCCATATTACA
AGGCTCATTACGGCCCTTGACCATGTAAAGTTCTTCTGCATTCAACTTGTCAGCGAGCTT
ATTTTTCTTAACGGACTTGAATGCAGGGTATTCGAAATCCCTAACCTCCTGGTATTTGGC
TAAGTACTGGAAAGATGCATGCGTTCTTTTAATCTCACACCACGGAGCATCTGTCTCTAA
TAACAACCTTTCTGTTGGTATTTGCTTTACAACAGCTAGATTTTCCTCGGTTCTCAACGA
GCAACCGTTTACTCCTATGAAGATGTTGGGTGATAAGTTCAGTAATTTCTGCAAATCTAT
CGCAGAACCAGTGAATGAATGGACCACTAGTTTTCTATCTGGATGAAATTTGTAAAACCC
GCTAGACGACGATGCACCTAACTTTTGTAGCTGAAAGGTATCCCTCTCATCAGTGAACCC
GGCAATAAATCTTTCCAATATTTGAACAAAATCGTCACATGCGCTTCTCATATGCAGAAA
CAATGGATAGCTGCTGAGTTTATCGTTCAAACAACTTATTTTCAGTTGCTCTTCAAAAAA
AACCTTTTGCATCTCTTTAGAACTATAGTGAAATCTGTCGTAGTCCAACCCGATCTCACC
AATTGACCTGAAACTTGTATCATGAGGTTTTGCTTGCTGATTCATCAAATCATAAAGCTC
TTTCAGTTTACCCTGTGCAAAAGATGGATTACTAATAACTTTAGCATATAGAGACTCATT
ATATGCTTCATCCATGGAAGGGTTATCAATAGAAGCGCTAGCCTTGTCCCCTTGACTAGC
ATCCGCAAACTCGTTAACGCAACATGGGTGAACACCTATTGTGTGATACAGCTTTAACGG
GCTAAGATCTTTGACGCTGCTTACCAACTCAATGGCACTTTGAGACTCCGCTATGGATGA
TCCTGTAACAAGGGCATTTTTCACGTGCCTCTGAGCAGCACGCTCTAATAATTTTACATA
ATCTGCTGGATGGTACTGCTTACCATTGTAAATACCGTGAAACATAGGATCTGTCAGATT
CAATCCAATATCATAGTATTTCAGCGGAGAATCCGTGGCAGTTGATGTCATGCTATAATA
TTGTGTCAAAATTGGTTTCCAGAGCCTAGAACAACTTTTGTTCGAGGATTTCAATAAGAT
GCCCCACATATAACTATAACAGTACTGGCGCCTCAAAAAAATGCCTTGGCAGCGAAAGTG
TCCACCTTTAGTTGTCCATTGCTACCAGGACATCACCACTGGGCCCTTCCAGCATGCTGG
AAAGATTGTTCTTAGAAGAGTGCTGTTCTAAGTAACCCGGCGTTAGTAGGGGCTAAGCCT
TCTAGAAGGCCGGAAAAGGCTCAGAAATGCCTGCAGTGCAAAGCTTTTCAGGAACGTTAC
TAGCGCAAGTCTTCTGGCTGCTGTTTAGCAACCTCTTTGCAGGTATTTCGCAGCGGGATT
TCGCAGGTGTCTTGCCTAGCGTATCAACACTTAGTAGCAGTTAGGTTCTAAAGTTAAACT
CCACTTCCGTTCTTCTTCGAGTTCCTTTTTGAGCGGTTTGGCCTATCTTGTCTCATCATC
TTGTTAGTGTGCGACGTTATCTGTGGGTGAGAGAGGCTATTTTTGGTCCGGTGAAAAAAA
AATTTTTTCTCTGCTGAGAGCTGAAATTTGAAAATTGAGATGAGATGCGATGCGATGAGA
TGCGAGACCAATGCGATGAGACACTTTTCTACTTCCTTACACAGAAGTCGTGTATAGTTT
TTGTACGTTGATATTAATAAAGGCTTTTCATATCATTTTGTTTTCAGGTAAACAAATCTG
GCAAATCTCCACTGCTTGAGTCATTAAAACTACTCACTCAAGAAGGCATATACACGACAG
TGGGTAGAGAAAAGAATATATCACTGTTCTTATTGAAGTTCCCTCGCGATGACGTTGCCG
AAACTCAGTAGCGTTTCTGTTTCATCAGGACATGTTAGTGCCAACTCACATGGTTTCTCA
ATACTAAGCAAACACCCTCACCCAAATAATCTTGTCCATTCCCACTCACTTTCTCACACA
AATGCGAAGAGCCACCTGCCTATCAGTAGCACTAGCACTAAAGAGAACAGCACGAACAAG
GAGGAGGCGGAATCACTCAAAAAAAACAACCCCTCTTCTTGGGACCCTAGTGATGATATC
AAGCTCCGCCACCTGAAAGAGATCAAGAACTTGGGCTGGAAGGAGATTGCACATCATTTC
CCAAATAGAACTCCTAACGCTTGTCAATTCAGATGGAGGAGACTGAAATCAGGCAACTTA
AAGTCTAACAAGACCGCAGTTATTGACATCAATAAGCTATTCGGCGTGTATGCGACTGGT
GATGCTACCCCATCCGCGGGTACTCCGTCTGCGGAAGAAGCCGTAAAAGAGGAAGCTGTT
GAGGATGAAGATATTACTGCAGGTTCTAGTGCTATCGAGGATTCTCCACCGGATTTCAAG
CCATTAGTTAAGCCTAAATACATGGACAGAAAACTGATAACTCAAAGATCTACATCAACA
TTTTCGGACCATGAGCCACAACACACGAAACCAAGGAAACTGTTTGTTAAGCCAAGGTCC
TTCTCTCATTCTATAACAACCAACACGCCTAATGTAAAGACTGCTCAGCAGACAAATCTA
AGCCTTTATAACACTACTTCAGCAAAGACAAATAAAGCTGTTAATTCCAATGATTATGAG
AATATTGGTCTTGTGCCTAAAATTATTATCAGGTCTAGAAGGAACTCCTTTATTCCTTCA
ACTCAAATCCCTCATTCAACGACGAAGACTAGGAAAAACTCGCATTCCGTAATTTCTTCT
AGAAGATCATCTTTTAACATGATGCATTCAAGAAGATCATCCTTCAACTCTCACGCTCCT
ACGGAGCCTATTTCTAGAAGAGCTTCCTTGGTAGTTAGCCCGTATATGTCACCCAGAAGG
TTATCTACATCGCAATCCGTTCATTATCATCCACAGCACCAATACTATCTTAACCCCATA
GCGTCTCCCAACTGCAAGACAGACCACGCAAATGACAAAATCACGCACACGAGGACTTTC
TTAGATATGCAAAAATTCGCTAATAAACACCCGTGGTCTAGAGAAGATGATGAAGTGCTA
CTTAACAATACGAAGGACAAACAAAACCATTTGTCGCCGCTAGAAATTTCTATTGTTCTG
CCTAATAATAGATCCGAGTTGGAAATCCAACAAAGAATGGATTATTTAAAGAGAAAAGGA
CGTGTAAGTGGTTTTCATACAAATGAAGGATGCAAAGACGAGGAGGAGGAGGATGACATT
GACCCACTGCACAAGGAGAATGGCATTAACACGCCATCGCAGCAATCGCAAAATTACGGT
ATGTTAGAGGCTAAACATGATAATCCAAAGTCTAGTGAGCTTTCTTCTATGACCAGCGCA
AATGACATACGCAATGAGCAAGATGAACTTCCAGGTATAAATTCTATCTTTAAAAATATA
TTTTAAGCTAAGAGACGAATTTAGTTTGTTTTGACTATTCGTTTAATGAGTACAAATTAA
TCGCACCCACACATGTACACACACACATATATATCTTTATATATACACATAAAATTTATT
CGTAGGAGAATTCTGTAATACTATTGACTACAAGGGTTCTTATTGCTATTAATAATGTTA
CATGTATATGCTTATATCCAATATATACCCATCGCCGCTTATTCTTCGTCATCCTCTATT
AGAGTTATTTTTCTTCTTTTTCTGACTCTCTCCTTCCTTATGTGGCTTTCTATATCGTTT
TCATCCTGCTCTTGTCCTTTTCTCTTCCCATCCTCATCATCATCACTGTCTTCTTCATAT
GTGTCTTCCTCCTCATCATTTTCTTCTGATATTTGCTCATCCTCAATGTCATCATCAAGG
GTAAAGTCTTCGTCTTCGTCTTCATCTTCTTTGGCGTTTTCACCTACATATAATTCAGTA
TCTACATCGTTTTCTACTTCATCCTGCTCTAAACTTGATATTCCAGTATCGTTTCTCCTA
GCTGCATGATTTCCAAGTGGTGTTTCGGAGTTTTTAATAGTGAAGCAGAGCTCCCAATGA
GTTTCTGTACTAAATTTTGATCTTGGTATCCCTTTGCGATCATGGATGCTTTCCAGCACT
CTTTTTTCCGCTTGATAGATTAATCTATCATTATTTGTGTTCTTATAATCACACATATAC
TCTGTTAAGGAGGAAACAGTGTCTTCAAAAAAATCAGTAGCAGGTACTTCCGGTTCTATG
ATATTGTTTACATGAAGCTTGGATGTTTTGTGCTCACTACTTCTTCTTCTTCTTCTTCTG
CGTTTATTATGTGCTCTACTGTTGTTATAGTTTTCTATATGTGTGTTATTCGAAATTACC
GGAGCCATAGTTTCATTTGTAAGAGCTTCGTCCGCTAATGCGGTGGGTTCTAAGTTCATC
ATCCCATTTATACCAAATGACGGCCCTAATATAATAGGTTCCCACAATAGTTTGTCATAT
TTGACGCGAGGATAGTTTTTTGAGCTCCAAGTTTTGTAAATATTTTCAATCCTGTTCCAA
GAATCGATTTTAATAATATAGTTGAAATCATCCAAACTGGATAATGAGCGTGTTTTATGG
CGATACAAAACTTGAAGTTGTTCCAATCCAAACACAACGTCTGTTGGTATCATTCCTGTT
AGTTTAGCGATATCGTTTAGGCTAACCTGCTGAAAAGTATCTTCATTTTTATTATTTGAT
CGACGTCTAGCACTGTCTCTTAATTTTAATAGCACTTCAGCACATTTTATCTTCCAAAAC
GTTCTGTAAGTCAATAATCCTAAATCCGACAATGGTTTTTCAGGAGTTCCAAATTTTGAC
TCCTTTCTGGATAATAAATATGAAAATTCCATCAAAAACTGACCATATCCTTTCCTCTGG
TATATGGGTAGAGTTAAAATACAACTTAGGTTATAGTCATTGGAGTTGAATTTTTCCTTG
GAGAAATAGCCTACGAAATGGAATTTGGCTGCGTTTTGATAGGGATGGTTCTCTGTATCC
TCTCTCTCCGTTAGAATATAGAATATAAACGGTTCAACATCGTAATACAAAGTCTTAGAA
TTGATAAAACATTTTGCCAACAGGCAAAGATTTTGACAATACAAGACATTCTCCCGCCCA
TCAATTTCCCAAACAGACAGCTTACCGTCGCGATAAATTTCATTTCCGGGGGGCTTAAAA
GTTAGACACTTTAGTTGGTGTCTATAAAAAGTATATCGAGAAGTCATATATTTTAGGCAG
AACTCACATATAAAAACCATTTTATTTTGGTTGATGTGTTCCGGAAAAGGAGATGTATAC
CAAGGTTTAATTTCATAATTTCGAAGAACAATGTATTCTATCTGGGAAAACCACACTTTA
TTTTTGATTCTTGGTACTTTCCCTTTCCTTTTTTTCCTATCTTCGTTTTCTTGATCGGTT
TCATTATGATTGCAAAGTGATACGTTACCATTAATGTACGTTGCAGACTTAGAGTTTTCT
AAAAATGTAAGAAACTTTATTTTATCTTCCCAGGTGGGTAAAGTTCTTTTTGTACTGAAA
TCTTTCATTTTTTTTATTGTTCCGCCGTATGGTACGTACCATTGCCAAGAATCGTTATCC
CTGAATGGCGTATTATCAGAAGAATATGGGTACTCCATGTTTTCGGTTGCTAGATCCCAT
GTTTGCTTTAACCTGTTAACTCTTCTTTGAAACCCGATTAGAGGACCGGATGATGTTATA
TTTTTGTTAACTAAAGGTGCTATGACTGAAGATTTAGATATTAGTCTTTCAAAATTGAAA
AATTTGATAGAATCATACTTAATTCTAACCTTCAACTCCTCGCTGACTTCAATATTAGGT
TCAATAATGGGGAAACTTACTGCTCCCATCTTATTGTCCCTATTAACGATATTTTGAGAA
GAATTTTCTGACGCAAGTTTGGACTGCTGGGAAATCAACCCTTTTTTTATTTTATTAAGG
CCTTTATCAGACCGAACACTTCCTCTTATTCGATGTGATATACTGGCATCGGAGTTGAAT
AGTCGTCTTGTAGTTCTATGTCCATTTGTATCGCTTCTGACAAATTGAGAATGTATCAGA
TCATCGATCTCTAAGTTTTTCAATAATGCATTTTTTTTGGGTTTTGGCGATTCGTCGTTT
GCTGTTAATGACATTATCTGCAAATTATACGGAGACTAATTAATGAAGAAGGAAGAAGAG
AGAGGGCGGTATGAATAACACCTATGAGAAAAGAATAGCAATGCTTTTCCTTTTTTACCT
TTTATATTCGTTCTTTCTTCTTTTGCCTCTTTTAATATGCTTTGTTTCTGTGCTATTTTC
CCGACTCTTTATTTCAAACAATGAAGCCCCCAATTAATCAAGAACCACCAAAATAGCATG
TCAGTTGAACACTCAACGACTAAAAAAACGAATAATTTCTTGTTCAATTGGCCTGAACGT
TTGACTATGAAACTTTCTGCTCTTCTCTGATCATTGTAAACAAAGAAATGTCAATAAATT
ATTGTTACCCGACTTTCTATATACTACAAATACCGCCAATGATGCAGTGAGCAAGATATC
AATTAATGCAAAAACAATATCGAGTAAGGTAGAAACATCTCTGTGATTAAACATCGTACA
TATAAATACCATATATAAAAGTATGTGGGAAAAGAACGTTCAAAAAAAAAAAGTAAGTAG
TAGGTTAAAAATAAAATCTCAAAAGAGGGAAAAAAAAAAAAGAGGGATAATTTTGGCTTG
ATTACATTGCGTTACTTAAAGTAGCCTCATCATTCATTCATTATCATCGTTTCATCGACA
TTAGGTGACGTTTCTCAGTAAAAATTAACTTCATCATGATCATTAATTTCATATTCATAT
TCGGTTATTTTTTTTTTTTTTTATATTTTTTTTCAATGGTGTTTTTGATGGTTTTTATTA
TATATATATATTTTTTTATCTTTTATCTTGTGTAAGCACCCCTCATTACTTGTATCGTGC
GATATACAAATACCAAACAAACTCTATAATCATAGAATAATGGAAGTATATATTACCATA
GATTCTTCTTGTTTTGGTTTTGTAAATCCAGTCCGCTTAAAGAACGATTCAAGCCCTGTT
CCAAGCCATCATCTAGTCCAGAGTGACTCAAAGATTTATAGATCAAGTCGGCACTATTCA
AATTGTGTGCGGACAACATGGACTCATCGTGATAAGACTGATATGAGAAATTAGAATGTA
CTGAGCCATTTGTGTGCTGTGGAAGCAGTTGGGACTGTGAGTTTGCTGAAGATGGGCCGT
TAAGGTTGTACAACTGCTGGGAAGACAATGAAGCATTTTGGTATGCCACTGGTACCCGTT
GTTGAGTTTGGGACTGTGCTGGTGGTTGCGCTTGGGATAGGGTTTGGCTGTTGATTGGGA
TTTGTGAATTTGGAGGTGAAATTTGAGAATTTCTCAGTAAGGGATTAACGGAATTGATTT
GATAATGGTTGGCAGAATAACCGGATGGAATTCTTGAGGATGGTGTTAAAGTAGCTTGTT
GTCTTAAAAAAGATTGTTGTTGTTGCGCAGCTGACTGAACATTTTGCTGTGTTTGTGGTT
GAGGTTGTTGCGGTTGGTCTGCGGAATTGTATTGAGAACTATGGTGTATGTTCATTTTAG
GTGAGGTTAGTGTTGGTTGCATGGAGAATTGTCCCTGTGAAGAAATTTTTGGTGTTGAGC
TGGCGCTATTGTTATTAATGATGACATTGTTACCGTTACCGTTATTACTGTTAATAGTAT
TGCTGTTGGAAGAATTGTTAACGGCCTGATTGCTAATACTATTCGCTGCAGCTGCTGCAT
GGGCCTGTAACAAACTTGTATAAGATTGTGACCTATTCATGGAGCCGCCAGTGGAGTTTG
GCTGCAAAGGATGAGCAGATGTCATTTGACCTTGTTGTTGCAAATGAGATTGTAAATTAG
CATGATCCAGAATCTTTCTTCTGATAATAATAAATCTTGGATCATATACTTCTACTAGCC
CTAAGTACGAGCACAAAACATTGATAATTCTCTTGTGGGAAGCGGATATACCCATGGGAT
AAGCCAACTCGTAATAATACTTTTCTCTATCCTTAAATAACAATAATTGGGAATAAATTT
CCAAAGTGTCAGGGTCATTGAAGTCCAGTTGTTGGGGTGGGAGAGGCAAAGTGGAAGTTG
ATGGTAAAGGCGCATAAAATCTCTCAGTGGACATCTGGGCTTGATTATTAACGTTTGTTT
GGTACAACGATGAAGAAGTATGTTGGGCAGAAAGTGAAGGTTGGTTCAGAATGATGTTAC
CACTATTGTTGTTATTAGAACTGTTATTGTTAATGGTATTATTCATTGGACTGTTCATCA
TGCTATTAGCATTAATGCCGTTCATTAGAGTCGAGAATAATTGATTGTTAGAAGTATTAT
TGTTTCCGCTTCCACTCATTTTAGATAAAGAATCCAAAGAAAGATTAGATGACGATCTGT
GTTGTTCTTCTAATTGTCCTCTTTTCTCTCTCTTCTCCCTCTCGATTCTTTCTCTTTCAG
CTTGGGGAAGCATTTTTTTATATTCCACTTTCAATTTCCTCCCGCTGATTTCCTTTCCAT
TCAAAGAAGTTATCACTTGAGTAGTTTCTTCAGGAGTGGTGAAATTCGCAAAGGCTAGTC
CTCTGAAAATACCGTTATCAAAGTGGTAATTGAAGGCATAAGGAAGGGGAAGATCCATTT
CTTCAATAATGTCTAACAATTGCTCTTTTTTAATAGCAAACGGAATGTTTTTAATAACAA
TAGCATTTGGGATAACATCATCGTCCAAAGCACCATTGGTGGGGGCATTATTCAAATTTG
TAGAAGAAACGTTTTGTTCGGCATTTTTTGCAGAGTTCTCACCAGTTTCCGTTTGCACAC
CGTTTTCTTTGTCAATTGCATCTCTAGTTTCGATAGATTGCTGATTTGTTTCCTGGTCAT
TAGTCTCCGTATTTATATTATTATCCTGAGCATCATTGATGGCTGCAGGAGGAGCATTCT
CAAAAGAACTGGTCTCCATTTCTTATTGTTGTTGAACACGCTTTCCCTAGTCTGTAGCCT
GCCTCTATGAGTACTATATCACACTTCTTCTTGCGCTAATCTCCAAAGACCTGCTGGTAA
TCTCAGCTGAAAGGCTGCCTTTAATTGTTATTCTTTTCCAGGAAAAAATCGCAAAGTTGC
AGCATCCGTGTTTCGTGACATCATTGAAGGTTACCCTAATCTATTACCTCGGATTAACTT
GAATTAATAAGGACACACAGGTATAGGGAAGGTAAAGTTGAAGTAATGATAAGAAGTGGG
CAGCACCGAAGCAGTTTATCTGAACTAACTTCTGTACGACTCGAGAATATAGTAAGAACA
CCATCATTAACCTGAAAGTTAAAAATGTCAGACCCTGTAGAGTTATTGAAAAGAGTATGT
AGTAGGGAAATATATCAAAGGAACAAAATGAAAGCTATGTGATTCCGTAATTTACGAAGG
CAAATTACTAACATTGAAATACGGGAATTGATATTTCCCGTTGTGTTAAGGCTGAGAAGA
AGGGTGTTCCTTCATCGGGTTTCATGAAATTGTTTAGCGGTTCTGATTCATACAAGTTTG
AGGAGGCTGCTGATCTTTGTGTCCAAGCAGCCACCATTTACCGTCTAAGAAAAGAGTTAA
ACTTGGCAGGAGACTCGTTTTTGAAAGCTGCTGACTATCAGAAAAAGGCTGGTAATGAAG
ACGAAGCAGGAAATACCTACGTAGAGGCTTATAAATGCTTTAAAAGCGGTGGAAACTCTG
TGAACGCCGTGGATTCATTAGAAAATGCTATTCAAATTTTTACTCATAGGGGGCAGTTCC
GGAGAGGTGCTAATTTCAAGTTTGAGCTTGGAGAAATTCTAGAAAATGATTTGCATGACT
ATGCAAAAGCTATAGATTGCTATGAGCTCGCTGGTGAGTGGTATGCCCAAGACCAGTCGG
TAGCATTATCGAATAAGTGTTTTATCAAATGCGCAGATCTAAAGGCTCTTGACGGTCAAT
ATATTGAAGCAAGTGATATATATTCGAAGTTGATCAAGAGCAGCATGGGCAATAGATTGA
GCCAATGGAGTTTGAAGGATTACTTCCTAAAAAAAGGGCTTTGTCAGCTAGCTGCTACTG
ATGCAGTCGCTGCTGCAAGAACTTTACAAGAGGGTCAAAGTGAAGATCCGAATTTTGCGG
ATTCAAGGGAGTCAAATTTCTTGAAAAGTTTAATCGATGCTGTTAATGAAGGTGATAGCG
AGCAGCTAAGCGAACACTGTAAGGAGTTTGACAATTTTATGAGACTAGATAAATGGAAAA
TTACCATTTTGAATAAAATTAAGGAGTCCATCCAGCAACAAGAAGATGATTTGTTATGAA
CGGCATATACTTACGCGCACATACATATATACATATATATTATAAATGTAACACTTGTTT
TACCCGAAACGGCGAAGTAATTGTGTACCGCCGTGCACCTTTTCCTCGAGATAAACATAT
AGCGATGACTTAGAGAACAAAGTAGTATTAGTATCATATACTTCCAACGTTAATCAAGCG
CAATAAACCTTTGTTCGTGTGTTTCAAAGTTATTGCAAGAGCGAAGTTGAAGCCATCTTT
TCACGAGAAGTTAGCTGTGGTTCGAGTCTGTCGCACGCCGTGTAATGTAAGGATCTTCCC
TTAGCTTTTCTGATCCGGAGCCCTTGAGGGATATTACGCATCGCGTATCTTCATACGATT
ACTGTACTTTGCTGACTTGCATTCTTGATATTGGGCTATAGTTGGCACTTCGCTCGTTTC
TTTTCTTTCGTTATATAACGTAACCTTTTTTTTTTTAACTTCCTTATCCTGCCCCTTATC
ACTCTGAACCCCATAGATAAACAAAGACAGAACTCTGTCCTACTTTATCTATTACTAAAC
TCAACACATTACAGCCCAATATTATAAATACGTTCTTCTTCGTTACAAGAATAGGCGAGG
TTGTACGAACTGCAAACTAGCTGCAAATTAATTGTAACACTTAAGTGGAGAGCAGAGAGT
AGCAGCACTGAAGGAAAAGGGAGAAGCTTATCTTACTGTAGAAGAAAATGGGATTGCGTT
ACTCCATATATATTGAAAATCCGTTATCTTCCCCATCATCATCGTATAAATCAATAAACG
ACCCGTTATTCCACTCTCAGCATCGATCGCAAAAAAACGTGAGCTTCATCACCTACGGTT
GTAGACATTGCAAGACACATCTTTCCAGTTCCTTCCAGATTATTTCTAGAGATTATAGGG
GTAGGACCGGAACTGCTTATTTAATGAACAAAGTTGTTAATGTCGTTGAAGGAAAGGTCG
AGCAACGAAGAATGTTGACTGGCGACTACTTAGTCTGTGATATTCTTTGTCATTGGTGCA
AGAGGAACGTAGGTTGGAAATACTTGCAGAGCAGCAATGATGATCAGCAGTATAAGGAAG
GAAAGTTTATCTTAGAGCTGAAAAACATTTGTAAATGTACTTGATGTCTTCCTTTGTCTG
CTATCTAGCACCTCTCGTCTTTTAGTGCTTTTTAGCGTATGATTCTTTTTAAGAATCTGG
TCTTTCTTCCTTCTATTTTGATTGGGTATATTTCTATTCGTGTTTCATTACTGGTCTGGG
TTAATTGGGTTTTGGTTTGGTCCAGTTGTTTTCAAGTAGCCTTTATTTTTTCATTGTGGT
ATTTTATCTTATCGATTTATACTTTTTTTTATTCAAAGAAAATTAAACAGATAATCTCTT
ATGAGCCTAGCTACTTTGTTTTTTCTTACAGGGCCATTGACTTATGCCCTGAACGAGTCT
TACTTTACTTTTTTTGTATTTTCAATAATGTCGTGTTTCCCATGTTGTAATACGCCCAAA
GATTATGTGGTAGAGCTTTTTTTTTTTTTGGTTAGTGTATTTACCAAACTGGGATGATTT
TCAAAACTTATGAAGCAGTTTCAATACATAACTGTCTAACGTAAAAATTTTATAAAATGG
AAAAATAGATGATGATAACTATAACAATTTTAAAGTACAACATATTCTACTTTTAGAATA
ATTCACAATATACAAGGACGATCCTGGAAAAGGGTAAATATGATTCAGCTTCGAGGAAGA
AGTACAAAAAGAAGACGAAATGGTCCATTACAGACTAAGCACTATCCAACAAAAAGTTAG
TGGCGGCTTCTAGATCCCAGTTGCACTTTTCCAAGGCATTGTGCGCTTCTTCTTCAGTAA
ATCCCATGCCACTTAACTCCTCGACGGCTAGAGACTTTGGAGTAGTTGCAACCCCGCGGT
TAACTATTGGACCTTTTGACAAGCTAGCATCAACGATAGGATCATTCTTCAATGGAATTG
GTTGTTGTGGAATGCTTGGGGTAGCTACTTTGGTTGGTTCAGCTTTGGAGTTACCAAATC
CAGCAAAAATCTCGTCCCACTCATCGTTGCTTACTTGAGCAGGGTCACTGGTTGACTGTT
GTTGTACTTGTGGTTTTGGGATAGTTGGGTTAGAGGAACTAGTTAACGTCCCTGTAAAAG
CGTTCATTTGTAGTTCGTCATCGAGATCCTTATGGTCTATGGTTTCAAATTGCTCCATCG
ACCCAGCATTCGCAACATTCTCAAATTCAGATTCCGAATCAGCACCATTATCTTCCTCCA
CAGCCGCTTGTTCTAACCCTGCGAATTCATCATCAAATTCGTCCTTAACAGGCAAAATGG
AATTGGTGCTTGCCTTTTTTGAGTTACCTTCATTATGTGAAGGAGAAGTGCCTGGAGCGG
GATATTTTATGACTTGTTCCGTGTGGATTTCCAAACTTGATGTGGGCTGGGCATTATAGG
GAGTTTGAAGGGTCTTCACTGTTGCTGATGGAATTTCTCTGGTATCTTCAAACTCATCAT
CGTCTGAAGAGGATGAATCGCTTTCGTCAATATGCAATTCCTGAATTGGTGGAAACTCTT
CATTTATTGTCTTTGCTTTTGGTTGAGCAGAGATTTTTGGAGATTCTTGGATAGAACTGA
CCGACTCACCGTCTTCATTTGAATTAGCCCTTTTTGTGGTACTTCCGTCTTCAATAACTT
CTGTAGTTTCGTTGCTCAAAACATCAGTAGAAGCGGTAGCTGGGGTAGCTTCCCATTCAC
CAGGAATGTGAGATAAGTTTCCAGTATTATCTCTATTCGCAGTATTATTGATGGTGTCAC
GTTCTTCCAACGTTTCCGGTAGCTCAACATCATCTCTTACGGATTGAGGAGCATTGTTTG
CAACAGACGATGTCAAGGATTGACTTCTTGGAATACCATATTCATTCAAATCACCATCAA
ACCTATCACTTAATGTTTCAGTTAAGTTTGGATTTGCTGTCTCATTTCCTGACTGGGTGC
CGTTGTTTGTATTGGCATTTTCACTATCGCTTTGAGATCCCAAAGTTGGAACGTCTCTAT
CAAATACGTCACTTTCGGTTCTTTCTGTCTTTTCTTCATCGTCTTTAACCCGATTAACAT
TCAAGTTTGAATTCTCAACAGTAGTTTCGACAAATTTGGATACAGTGTCTTCGTGAACAT
TTCCTCTTGATGTGGCTTCTTTGGTTGTTGTATCTGTATTAGAGGCGCTTTTCGCAATAA
TGTCCTTAGCATCCTCAGGTAATTGTCCCATAGCTAAATTCATTTGTCTTTCGGATAACT
CTCTCACATTGTTAGCGTATTCGATGTTTCTCTCCTTTAACTCTTGATCAGCTTTTTCAA
AAGAAGCTTTTCTCTGTGATAGATCGTCGAACATTTCTTGCAATTTAGAAACGTGCTGAT
GGTAGAGATTTTCTTGTTCTTCAATTTGTCTGTTACGTTCTTCCAATTGTTTTTCACGGT
CCGTTAAATCAGTATCCTTGTTGGACAGATCCTGGTATTTAGCTTGTAATTGTGCGTGTT
GCTCCTCCACGGTCTTTTGGTAGTCATTTAACTCCTTTTGTTTAGTTAAGTAAACGCTTA
TCTTTTCGCCAAGACCATCGATTTCCTTCTGCAAGTTTGCTACTGTGACTTGATTCAACT
CTAGCTGTTTTGAATTAACATCTACCATTGACCTTTCTTGCTTGACCTGTTGTTGTTTTT
CATTTAATTGTGACTGTAAGGAGGCTGTCATCGAGTTCAAATTCGTAATTTGTTCTTTTA
ATTCTGCGTTCTTTGTTTGAGATTCTTGCAAATCAGTAGTTAGTTCATTGAGTTTGGACT
CAGCGGCATGGTAGTTTGCTTCGGATACAGCCAACTGTTGCGCTAATGTTTCGTTTTCTT
TGTTTACTTGAAGTACTTGTGCTTCCAGTTGTTCCGTTTGTTTAACATTTTGGTCATGGG
TAGAACGTAAATTGTTCAATTTGATTTGAATGGAATTTTTCATCTCAGTAACACGTTTCA
ACTCCTGGGTCGCTCTTGACTTTTTGTCATTAGTTATACTTGCCTGCTTGGACAGGGAGT
TTACTTGGTTAGATAAATTAGCCATTTCTGTGGTAGCATTAGATAACTGAGCAGAAGCTT
CACCATCTGCAAATAAATCCTGGTTCTTGAATGCATTATTGGAAGATCTTGAAAAAGCGG
ATGCGCCTAAAGCAGCAGCACCCACTGCGGCGCCTACAGCAGCACCAGTGGCAGCGCTAG
TGGCAGCGCCTGCTGGCATGCTAAACACAGAAAAGTTGGGAACTTGTGGCAGTGTTGTTG
AAGCTGTACGTTTGACTGGACTTGAAGCATGTTTTGGAACTGGCGGAGGCTGAGCGCTAA
AAGTATCACTGGATTCCCTTAGTTGCTCTTGTTCCTCTGGTTCTTCCTTGATTATACTTT
GACCGAAGTTTGAGGTGGGAGTAAATTTCTTCAATCCAGAGGAGGAGTGAGTTAAAGGTG
GAGGCTGCTGTGGCTGTTGTTGTTGTAATGTTGCTTGGCCATTGTTATTATCATATGAAA
AACTATTATTTGTGTTGTTTTGAACCACAGTTTGTGCTTTAGTGGGAGAAGGAGAGCTGA
ATGAAGGGTTCAAAGCCAGTAAATCATTCAAAGAACCGTTATTTGAGTTTTGAGGAAGAA
CTTGTGGAACTGTTGGTTGAGTATTAACTGCTGGGGCAGAAACTTGGTGTGGCATATCCT
GTAAAGAAGGCTTACTTGCTCTTGAGGGGATGGCAATTTGAGGTGCACTTTGTTGTTGAG
GAAGTGGGTTTGGCGGATAAAGTCCTAAAGCGGGGGACTGTAATAATTCATTGGGGATAA
CATCCGGTAATTCGACACCAGCATTCTTTTTTTGAATTAAGAACATGGCAATAGCAAATT
CCAATTTGGTGAATTCAGCATTGTTGTGGATGTCAGCTAAGTCCCAGATGGTGGCTAACG
TCTCTTGGTTTAATCTAGAGGATAAGAAGAATGGAACCAACACAGCAGAGCTTAGCGAAC
CAGCATGTTGCTTATCTAATGAATCAAAAATTGCATCAAACTGTTGTTTTTTTTCAAAAC
TTAAAGACCAATCTGAAGCAGCATTACTGAATGCACCAGTAGATAGACGTGATATAGTAG
AGTGTCTTGTTAGTGAAGATACGCCAGTGGAGTTAGCACTCAAAGGAGTAGTCCTGTTTG
GTTGATTAACAACAACAGGTTCTAAACGAATAGAATCCCACAGCTGAGTAGGCAACACGG
CCGGTGGTGTGTTCATACTAGGATGATGAGACATACATAGTTGGATCAAATACATGGCCA
TTATAAACTCAGATTTGTCTAAGACACCGGATGCGTCTCTATCACAAAGAGCCCAAATTT
CACCTAAAGTTTGATTTGGTAATCTTGCCTTTAAAAATATATCCTTGGCTTTATCACCAG
CAACAGTTTGAGCACCCTTTGCTGTCCTATCAAACAGTTGTGAAAATTTAGCAATATCAT
TTGAGGATAAGGCAGGAATATCAGTGTTGTTTGTATTGCCGGTTGCACTACCGCTTTGCA
TAGGGGCTGGGTTCTGATTTATAGAAAAAGAAGCCAGTTGAGTAGGTGTGCTCTCATATA
GGGCAGCGGAAATTGGTTGGTTGGGAGCATTTTGCAATTGAGCGATCATTCTCAAAGCAG
CCGAAAACTCGTTCAAGTTCAAAAACCCTTTATTGTCTATATCGACGGTAGCCCACACTT
GCGATAGTAATTGCCCTGGAAGACCAGAAGACGCGAAGAGCGGTCTGACTGCCTCGCCAG
TGACCACCCCGAGATCTTCCGTATCCAATTGGTGAAATTTCTGATTATAAAAGGCTTGTT
CCTGAGAGGATAATGGAGTTCTAAAAGTAATAGATGCCATGGCCTATATCGTTCGAATCC
TATTGAAAACACACAGATAAAAACAGGAAAAAAGATAGATCTAGAGCTTCACGAATCTAT
TTATTAGTTTCAACGCGCTATATTATTTCGCGAGAACCAGTAATTCTCTATTTAAAAGCA
CTCTATTGCCTATCACAAAGTGCTCTGTTGTGTGTTGTTTTCAATGTGCTTCTGAAAAGG
GGTTTGTAATAGTTGAAGATTTTGATTATAGGAGAAATCTAATCCCCCTCCGAAGCGCCG
ACGGGTAATGATTGTGTAGTTTTTCATTTCGCGATCAAAAGCATGTATTTTGACACAGCT
AACAATACCTATTATCATTTTTTGTTGGTGTTCTCATCGATTGTCAAAGCACAATAAAAA
GCTATGAGCTCGACGATGTTGGATGATGTGGATAATAATATGATGGGTATCAAGTCTATC
AGCCTTTATGAATTACTTAGCGATGTGGTGAAACAGGGCGACAAGACGCGATTGGTGACG
GCGGGTCCCGAGCAAGTTTTGCCTGATTTAATCCGGCATATCACTGAAACAATACCGTTT
GACCTATTTATAAACCTTAAGAATGAAATGAACGATGCGAGAAATCTCGTTACTAGATTA
AATTGGCTGGGTAAGTTTCTGAATGATAATTTTTTACAAAATCATACATTTCCATTCACA
ATACTTCGGATATGCGAATTGTGTTATGATCCTTTCAAATATTACAAGATCAATGAATTG
GAGAAGTTTGTAAATGCGCTAGAAAAATGTTGCATGGTAACTAGCAGTTGGCAGGTTTTT
GATAAAACACACGGTGAGAAGCAAGAGGACGATAAGGAGAAAGATATTAACTTCATCAAG
AATCAAGAAGATGTCTCACTAATGAAGATACCGTGGATGACCGAAAACAATACTAGGGAG
TTGGCACCCTTTATTAGAGAAATCGACTCTATAATGAGTGTCAACCTAGGCTACGATGAC
GAGGATGAAGAGGAAGGATTTTTTGATGGTGATGAAGATAGGGAGATGGGGAATAAGAGT
AAGCGTAATGTTTTGCTGAAAGATGAAAATTTCATGGTGGAAGAATACTATGAGGATGAT
TGCGGGATAAACGATGATAATAGCGATAATAAAGGACAAAATTGTCAGAGCGATGTTACG
AAGAATAATAGCGATGATGAAGATGACGATGACAACGACGACGATTATCGTGAAGATGGT
GCAGATGAAGATGATGAGGATGATGATCACATGGGCAGCACAGATGACGATGAAGATGAT
GACGAAGATAGGCAGGCGGGCGAAAGTACCAAGGTGCAAAATTTTGACAAGAAAAATGAA
ACTCCAAGGAAGAGGAAGCCCACAGATTTAGATAACTTTGAATATGACGAATCACCATCA
TTCACAAACATGGATCTCACGACGCCAAAGAAATATAAACATACCGCAACGGGCAGGTTC
TCCATAATAGAGTCGCCATCGTCTTCGCTCCTCAATGCCATGGACGGCAGTAATGAGATC
TCATCGAGCCAGGAGGAGGAGAAAGAGGATGCTCATGAAAACCATGAGGGTAGAAGTGAA
GGACTGTTACCAGGTGACGAATTAGTGAGTCCATCGATGAGCTCTTCACAAGAGGATAAG
ATGGTTGCGATTGCTGGTATTACCTACCGTGAGAATATTAGCAGTCCATTAGGCAAGAAG
TCCAGATGATCGAGAGATGACTTCTCTACCAACAACTTCCCATTTGCATAATATCATTAA
ATATGTTTTACCAAAAAAAAGTTCATCTTTCTTATTTTTAAAATCGATAGTTCTTCAGGA
TCTTGGTCACATATATATATATATATATATATACACTTATATAAAATAAGACGTTTATTT
AATCTTGTTTTCTTACGAGTTTCTTTTTTTTTCTTTTTTTATTTTCTACTTTTGCAAGGA
ACAGTGACCTTGCCAATAAATAATGAAGACTACTTGGGTTACTAGAATATAAAATACATG
TAAAAAATTCATTTATGGTGTGAGTGTGCGAGCGTGCCTGTATACATCTAGCAGCTTGCT
TATTTCTATTTTATGTGCATGGAAAATATATTATCACACATCTTACCATCTCATCATGGA
CATGTCACTTCTGATTCTCATGTAATCTAATAACCCTTCAATTTGGCCTGTACCAGCAAT
AGCAATATCTTGGTCCCATAATCTCTTACCGGCCCAAGCCTTAACATCTTTGACTGTGAT
TGCATCAATTTTCTTGAAAGCCTCACCCAGAGACAGTTTGGAGCCCTTGATTAGGACTTC
TGCGCCTAACAAGTTAGCGTCATTGACGGGATTACCAGATTCGTATAACTGCCCTAATTG
TAATTTCAACAGCGATTTGGCACGTTCAACTTCAGTATCAGTGACAGAAATGGTCAATCT
GTTCCATTGTTTCAAAGTGAAATGGATGAGGTCGTCAATCATGGTAACGTTTCTCGTGGC
CGTAGAGAACCCCCATAAACCGGAATCTTTGTAAGAAAGAGAGAAATGATTGAAATTGTC
GCATAATTGGTACTCCTGTATGTTGTCTAACAATTTGATACCTTGTAATCTAGAAGCGGG
TTCGAAGGCGTTGTATGAGCCGAAAATTTGGGCGGCTAATTTAGCAACAAAATAATTTGG
TGAATTGACAGGTTCACCTTCCACAGCCAGCGAAATCCACGCCTTTGGCAAGGTGTCGTC
TCTCAATCTAACTTCGGAACCCAAGAAAGCGGCCTTTTTCTTGAGTACGGGCTTGGTACC
GGTTTGCAAACTTAGGTTTTTGGATTCGATGGAATTTACTAAATCCTCATGTTTGATATT
ACCGGTACCAACAACAACAGCATTTGAATTCAAGAAATGGTTATTGGCAAAAGATTCCAG
ATCAGCAACAACTAAATTCTCCAAGGACTCCAAAGTACCTCTAGTAGGCAAAGATAATGG
AGTGTTTTGGAAGGCGGTGGAGTGTAAATGTTCCAAAACTCTGTTGGGATGGTCGTTTTC
TTCAAAATCTTGAACTTGCTTCAAGACAGATTTCTTCGTGGCCTCGAAGTTAGAAGAAGA
TAGCAAATTAGCCTTTTGTTGGATGAAAGACTGATTCAAGAAGTCTAGTGATTTATCGGT
AGAACCTGGCAAAGAAGATACAATGTAAGATTGGAAGTCTCTGGAGATATTGGAAGACAA
TGCCAAACCTTCCTTGGCGGCAACAGCAGAGTTTTCTTTGGATAGAAAGATGTTCTTCCA
TAAATTGGAAACCCCGTTGTTATAAGGGTTTTCGTTGGCAGCACCGGAGCCGAAGACAAC
ACCGACAGAGGCTGTGTGAGCGGAAGGATTATGCTCAGTGGCTACAACTATACCGTTAGA
TAATTGCGTTACTTCGGCCTTGGGGGTTGCTACAGCTGTAGCCAAAGACCTCTTGAACTG
GTTAGATACAGTCTTTGAAGTTACTGTTCTTAGCATTTTTTTTGTTTATATATCTTGTGT
TTTCTTTCTCAGTGATATGGTGACGATGATGTTCTTCTCGTATTATTACTCCACAATTGT
CTTGATCAGCAATGGTAGCAATTTAATATTAGGATTCGTTACCTATACGAACAGGGATGA
TATAATATTTTTTCTGTGAAAGCTATTGCTTTATTATACGCTGTTTTCCTCGAATAAGAC
GGGGAAAGAGAGTAGGGGAATATCGGTTAGGGAGCGCTGTAGGCCTTTAATTTTCTTGTT
TGGTTTTTATTTGGTGCAGCTGACAGCGCGGGCCCTTGAACTTCTGGAGGACAAAAAACA
CTGTTAATTTATTGGCATTTCATTGGTGCAGAAAGCGTGCTGTCCGGGTCACAGTTAAAG
TTCATATACATGTTACCCTACCCAGTCCGGGTTATGTAAATCGTGAAAAAGAATATCTGG
TTTTAAAATCTCTCTTTTCTTTTTCCCCCTGGTGGGTATGGGTGAAATGCTAGAGAGGCA
AAAAAAAAGGTTGCCAAGTAAAGCGAAGTATTTGAAGTATACTGCAAGCATCACCGAAAC
AGGAAATCACGAAGCTGACTCATCTGTGATTTTCCGTCCCCACCATAGTGATGTAACATG
CAGTAACGCACGGCGGGCCGAAAGTCGGACTTTACCCCAGATTTGTAGTTGTATCCTATT
GGATCACGGGCGACGGACAAGACCCGAAGTGCGGACCGGCATGGTCAGCTTGCACGGAAG
CTTTAAGGGTTTCCCTTGTTTCGGCATTAGAAGAGGCATTTCGCACGTTTTACCGGGTCA
GAAACTTCGAGGAAGCTGTGACAATTGGAAAAAAAGGCAAAACTAAATGCAATGTATCCG
GTTGCCCATGCATTATTTGTGATGTTTTCGGATGTAGTTCGCTGCGCTCCGCGGCGATAT
ATCCTCTAGCGAGAGGCATATGTATAAATATATATATATATATCTAACAAAAGCATTCAA
GTTTCTTTCTCTGGTGTTACGTCTTTGTTCGACTTTCTCTGCTTACAGCCCTGTATGACC
AAAGAAAAAATAAAAAGACAGCTACATACCAGCAGAAATTTTTTATAGTATTACACTATA
CATCCAAGTTTTTTCACAATTATTTATTGTTTTTCTCACATAGAAAATTCCGCATACTGC
GATTATAATGAACTCTACAACCCCATCGATTCAAGATCAATATATTTTGGCCAGCAAAGT
ACGCTCCAAGCTGGCAAAATGCGTTAGCGTGACTACTAAAAACAAAGACTACAACCTGAG
AGTTTTAGTCGGGCACGCAAACTTGCTGGATAAGATTACAGAAAATGTGGAAACTCATAA
TGCTGCAACCAACGCCCTTGCCGGAGACCCTTTCAGTAAAGGACCTGAAAACTTGTCCAT
CGAACATATCGAATTGTCCAATGCTAATGCTAGTAAAAATGACGTCGGTAAGGAGGAAAA
TGCAGAAAAGACGATAGAAAGTGAAGATTACTGTGATTTTTACTCTAGTGACGAAGATCC
AGATGCTGACACTCTATCTTCTACTGACAGTGAAGACGATGATGATTATGAAGACTATGA
TTTTGAGTACGATTACTCTGGCGGTGATTATAACAAGAAAATTGACATGTACTTTAGTTT
TCACACCGCACCTAATTATCAATATTTGACTCACACAAACTCTCATTCCGAGCAGACGGA
TGAACTTGCCGAATCAACGCCGCGCTACAATGCTCTTCCCGCCACTGCCTCTACGACAGA
GGAAGAACAGGACACTGAAACGCTCGATGCTGTGAGTTTGCATAGTTCAGCGCCAATCTT
CCGTGTGCTCTCTCGGCGGGTAAATGGACAAGAAGATGACAGCGAAAACGAGAGTAGTAG
CGATGTCGACGATGGTTCCGTACCATTAACGAGATTTCATTCTTGTCCTATCACAGCATA
AATTAAAATGAAGGAAATAACACAACTTCGTTTTGCATTATCATATTCACATCTGCATCC
TATTTTTTTTTTCTCATTGTTGTTGTATCATTATTACTAACTAGTGCATCACCACTTGTC
TAAATACCAAACGCAAAATATATATATTCTTACTTCATAACGTTCAAAATAAAGTTTTTA
GTTTAAAATAAAATAAAATAAAAAAAAAAAAAAAAAAAAAAAAGAACCTTTTGTTTTCGC
CCAGTATATGGGTAAATTAACGGTTCCTTTTATTAGTCATTTTCAACTCTATACCATGCT
CCAAAACGGCGTTCGGCACAGGTTTTTTATTTTACCACGATAACTCAATATGTACAAGAT
TATTGCATAGGCGAAAAGTAAAGTTTTAATATGGTACTTTGCGCAATAAAACTACGAATT
CAAACGTAAAATAAGACTACAGAGACTAAGGTAAGACCTGTTCTGCTCAGATAAGTGGCG
TTGTCCAAGTATCAGTTCTACGGGAACGTAAGAAAAAATTTTGCGTGAGCTCTCTTGAGA
ACCAAACCTTCTTTTTTTTTTTTACGAAATGCTATTTCGTTGCAGTGAGAAGGATTTTTT
GAAAACAGAAATGAGTTAGGCCAGGCTGCTCGTACTCGCTTAAATTAGGAGTGCGAGACT
GAAGACCTATGGTAAACAAGACTTTTTTTAACTAATCAAGCATGCGTAATGTTATTTTTA
CAAAATAAAGGTTACAATTTGAGATTATGCAGAAGCATATGTCTATATGTATGCAACAAA
TATGATGAGGCCTATGCAGATTATAAGTAAATTATTTTTTTTTTTTTTTGGCTTTGACAT
TATCATGATAAGGTGCTACTTGCGTTGTTAACAATTGTGTTTAGATATATCGTATCTTTT
CATAGCCAGTGGAAACGCCGCCATATTCTTCAAAAGCTTCTCTTTCAGTTCCGAATTCTT
CTACTTCGACCCACTCTTCGAGCCATTTACGGTCAGTTATCTTGGCATCGCCTGGAATAC
CCTTAATTGGGTAAAAATACACTAAAATGCAGTAACTCAATGCTGCAAGGAGATAACCAA
CGAAATAGTTTAGGTAGTAAACTTTCATAGCGCCAATAGGCACAGAAACTCCCACTGAAC
CTAAAAAGCCTGCAAAATTAGGAGCAATACCAAATATATAAGCTACCACCGCCCTCCAGT
TCGTACCATATTTATTGTACATGTAGTACGATCCTGGCTTGTCGGTGTAGCAATGGAAAA
TATTAACGTAACCCTTTCTGACAATGAAGTAATCGGCTGATATTACACCCGCAATAGCAC
TTAAGAAAACTGCATATGCCGCTAGTGCCGTAGTAAACTTTGACGATGATGATAATAAAT
CCCAGGGGCAAATCGCCAACGATATTAGAGCACAAATATAAGAACCGCGTCTGATATTGA
TGAATTTAGGCAATAATGCAGTCAGATCGGTACCTGCAGGGATCGAGTTACCAGACAAGT
TGGCACCCAGCTGGTCAAACGCAAAAATGAAAGATATTAAGAATACACCGGCTCTGTTCC
CCGAAGTATAGTTATCCAAGTACCTGTTCAGAATGTCTAGGGGACTCCAATAATTTACTC
CGTACAATGTATAAGCTGCGGAGACAGACAATATTCCGATTAAGGAAATAATGGCATAGC
AGACGGGTAGCGCAATCAATTGCGAGTAAACAGATGACTTGTAGGTCTTACCGAATCTAG
TGAAGTCAGGAGCGTTTAGGATTAAAGTAGAGAAGTTATCCAGAGCACTCATAATAGCTC
TAATGACAGACCATGCTAAAACCGTCTTGCTGATTGCGCCACCATTGTCATTTAGGGAAC
CCAATGCCAAATGACCTTTGGCCTTACAAAGAGTCCAAATCAAAAAACCGAAGGCCGCAA
ATGGAGTGATGGCGGATTTGAGTGCAAATATATGACGCAATTTGTCAGGTGGAAACCATA
GGAACGGTAAACATGCGACCCAGAAGACCATGAAGCACATGAACTCGAAGTTCGTCAAAT
TGGGGTTCTTTATGGTGTCTTTGATTCTAGTATTCAAATTAGTACCGAAGATAGCCTTTA
GCATCAACTGAACACATTGACTACCGATATAAGCCAAAGTAGAATTCCAGACACATGCCA
TGACGACACGGTTGATGACAATCCAGATGGAGAAGTAGATACCAAATGATACTCTTGAGG
AAATGGGGAAAGAGATATGGTAATTGTTCCCCACTTTGGAACCCAGTATCAAGAAAAATG
CGACAAACGTGTATCCAACCCAAATACAGATCCAAGTCTGCCACCAGTTAAGCCCTAACT
GTAGCCCAGTGGCTGAGATTTGCCATGTATTGACGTTAAAGGACCCAGAAATCCAAAAGA
AAATGTACTGCTTCCATGTCCACGTTCTTCTTTTTGCCTCCACGGGCCGCAGATCTGTGT
TGTACAAGTACGTCGAACGGAGGGACTCCTGTAAATCTTTAAATGTCCTAATTGGATTTT
CGGGCTTATGATCGGCCAAATCGGTAGAGTCATTCTTAACCTCAAAAAACTCGACAACTC
TTTGCAGCCAAGACACCTTTTCGTCATCCTGAGCAATGGTTATATTGTTTTCTGAATCGG
TATCTTTTTTTTCAATGACATTAGCATCAATCTTAGAAGTAATTTTAGTCGCATCACCCA
TCTCGGACTCTTTCGTGATTTCTTCGTAATCCTCCGTCGGTATAGTGTCGTCCTTCATTG
TTTTTGAAGAATTATCGAATCCAGAATCAGATACCGGCATTTTCTCTTATATAGAATTAA
TGAATGAGAGGACTAGTTACCGCCTTTTATTTCCGCAATGTGCTGCAAAGTAAAGCAAAG
CTGTCCAATACTATGTTTTAAATTTTACAAGAAGGTCGAAGCAATACTACTGTTATATAA
AAGATAGGATAGCATGTCATCGAGTAATTGAGCAAGAGAGGAAATGAAAAACTTTTCCGT
TGGAGAATTGATCAAAAATTTTCAAAAATACGACATGTCCCTGTGTTGTCCAGGCTGACA
CAATAGTTTCAGTAGCGAGAACCGCCAAGTTTTATTGCAGCATCCTTTAATGGCAAAGAT
GGCGCGATAAGGACGAAACCGGCAAATCCCGAGCATCAACCACAGTGAACGCCGCGGAGA
AACTCAAAGGCGAAAGGGGAGAAAAAAAGAAATTAATGGCACATACCGCTTTGTGGCATG
GCTCAATCACATTTCTTTTTCTTCTTTCTGATCGCCCGCAGGAGAGGCAGCGCCGTTTGT
GTCCCATCGCAAGGACAAACTAGCTAGGACATGAGACTTCTAAGCCGTTCAGTCGAAAGA
GTTAGGGCATTAGTCTCTAAAGATAAGTGTGGGGGCTTGGTTGAGTCTTGATTTAAAAGC
TTGGAGTAGGCATTTTACGATCTATTTTCTCTCGAAATAAAGTAAAGGTATTGCTGCAAA
GGAATTGCCGTAATATTTAAAACTTCTTGCTTAAGTGATGTAAAGGCAGTGAGGCGATAG
CAATGTTTCGTAGAGCCTGTGACTAGTGAAGCATAGGCAATAAATTGTTTTTTTTTTCTG
ATTTTGTATTGCCGTCTCTGCGTCGCAGAGATTTGGTGTTCGTACGGAGCGATAATTGTT
TTTATCTTTTCCAACTTAAAGGATCGAGGAAACTCAAAGGGTGGCAAAAACAAGCGGTAT
AATACAAGGTGAACTGAGTTGGAAAGAGAGTAGCCAAGACTATTGAACTATAAAGTTAAA
CAAAATATGGCCACTATTGCATCAGAATACTCTTCGGAGGCGTCAAATACACCCATTGAA
CATCAATTCAATCCTTACGGTGATAATGGTGGTACAATCCTGGGCATTGCAGGTGAAGAT
TTCGCAGTGTTAGCAGGCGATACAAGAAATATCACCGATTACTCAATTAATTCTCGTTAT
GAACCCAAGGTTTTTGATTGTGGTGATAACATAGTCATGTCGGCGAATGGATTTGCAGCA
GACGGCGACGCTTTAGTAAAAAGATTCAAAAATAGTGTAAAATGGTACCATTTCGACCAC
AACGACAAAAAACTATCTATAAACTCTGCAGCAAGGAACATTCAACATCTTCTGTACGGG
AAGAGGTTTTTCCCTTACTACGTTCATACGATCATTGCGGGTCTTGACGAAGATGGTAAG
GGCGCTGTCTATTCGTTCGACCCAGTTGGCTCCTACGAAAGAGAACAGTGTAGAGCAGGT
GGTGCTGCGGCATCATTGATCATGCCATTTTTGGACAATCAGGTTAATTTCAAAAATCAA
TATGAGCCAGGTACAAACGGTAAAGTCAAAAAGCCTTTGAAATACTTGTCCGTGGAAGAA
GTCATCAAACTGGTGAGAGACTCGTTCACTTCTGCTACAGAAAGACATATACAAGTGGGT
GATGGGCTGGAAATCCTTATTGTCACCAAGGATGGTGTAAGGAAAGAATTTTATGAGCTA
AAAAGAGATTAATGCATACATATCATAGTATAAAAAGAAATAGACCAATATCAACATCAA
TTTTATGTATTTTTTTTTTCTTTTGGTATAGCATTGATATATTGAAATTTGTATATATTG
CTGCGAACACTATTTAAAACAGGTTTTTTTTTTATTTTGGCAGTTTGAAACCCTTTCCTC
TGATGACTTTAGTGTAGTAAATGTAAAAGAAATCAGAGTACAACAGAGTTTGCAAAAGTC
CCGCGAAGAAGGCAATCTTGTCCAATTTTTTATCTTCCGTGCTGTACCTCCAAATCCAGT
TAGGAATATACAATGCTCTGTATAATCCCATGGCAAAAATATAATGAACAGTTAGACTTC
TAGTCTTCCCACCCTTAGATAGCATGTACAATTGAGGTAGAATAGCCACACTCTCCAACC
ATACAGAAAAACTCCATGCTAATTCAAGAAAAGTGAACTTGTGATGGAAAAAAACACTCA
TTAGAGCACTCCCAATTAGTAAATGCTGGATCTTAAAGGTATCATGCATAAGCATTTCAT
TATACGCAATGGTGTTGGTTCTTTTAGACCCTTGTAATAGCACTACAATGTAAGCGGTAG
ATACAATGAAAAATATTTTCATTAGAGCATTGTATAGGGATACCCAGTGAAAAGTCAAGA
GATCCAAGTATCGTGTTATGAAAACCAAAGCGTACAACGTTTGGGTCTTGAAAGAAATAC
CTTCAATGTACCTTGTGGTCTTGATATTATGAATCAGGATCAGTATACTGGTTAGATGTG
ATAAATCACCTGTCTTGATGGTCGGGAAAAAGCCCTTTCTCTGTTAGTAAGATTGGGTTC
GATCTACGGCGGGAAAAGCCTCATGAAACTCCAAATAGTAACATACCTAAGATTCTAAAC
GGATTCATTGCTTACTGATTATGCCTCAACTTGCGCGTATATCTCACTCTTGAACAAGTG
CCCTCAGCAAATTCATCTGCCTCGAAATTTGAACTTATTTTTAACGTGTTCAATATTTAG
CTAAAACGTCGTTTTCAGTCCGGGTACCGCAGATAAGCCATCCCGGATCTTTAAAGGAAA
ACGAGGAATTCAGTGGTGCAGACTACACTTTAATCTCAATTGACCAAAGTGAGTCCTCAA
GTAAGACGAATATTATTTTTCTTTCACGACTCAATTGAATTCCTAATAACACTTTTGTTT
GCTGTATTAGCTTTTAGCTTTGAGAGCGATGAAGCAAGAGAGAAAAATAAGGGTAGAAAA
AAAAATTAGAAATTGAGGAGGGGAAGGTATTCTAACCTGGTGAATTCCCAGATACATAAG
TATAAGAATTTCTCGGCAGAGATTATATACAATAAAGAATAAGGTTCAGTTGGACGATTG
CGATAGTAGCGTGAATAACAATTTACTTTAATCAATCGTTAGGATACTTCTAATGGGCTT
TTTTAACAATAATCCGGTAATTGAATTCTTCCACAGAATAACGAGAAAACCCAGTACCAT
TGCGATGTGGGTGTTTGCTGGTCTGATTTGTTCAAGTACATTTTATTTAATGTTCATGTC
ATCACCTACAATCGACTTCAACTCGAAGAGTAAGAAAAAAAATGATAAATAATCTCCCTG
TTCAGTACTTTGGTAAAAGCACGCCATGGAAAATTATTTAGAACTTCCTTATACAAAACT
AAATATTTGAGCATATTCTATATTCATACATAGATACATTCTTTGAATTTCAAGACTCTT
ATTTCTCATTTTGAAAGCCAAGATTGGAGGAAAAATCGTAAATTTTTATCCAGTCAGTAA
CAACTGTTGGCCAGTCGAAAACTCTATCGAAACAGCTTCTATATGTCAGATAAGATAGAT
TTATTAAATTAAATATATTCAGGAGAGGAAAGACAACATGAACGAAAAAAAAAAAACAGT
GTAGAGAAGCACTACAAATATTTTCTCTTCCAAAAAATATAATATACATAAAAAAATTAG
AAATTTATCTTTGTTAATGCAGTAGACTTTTAATTCTAAAATTTTGATTTAAAAGTTGAA
TTTGTTTTCGCCGGCCTCAAGATCGTACTTACCTTCAATGACATCTTGAAGGATACCAGC
GGAAGCAGCAACTAAACCCAAAAATGGTTTGGATGGATCTAAGACCTTTGATGTGTATTC
TGGGTGATATTGAGTAGCAATATAGTATGGGTGATTCTTTAATTCCAAAATCTCACAACG
CTTTCCAGTGTCGTCCTTACCTACAAAGATCAACCCGTTGTTTTCCAATTCATCAACCAT
CTTTGGATTGATTTCGTAACGGTGACGGTGTCTTTCATGGACTTCGGAGACGTCACCGTA
TAACTTCTTGATTTGACTCCATTCAGTTTCATTTTGGAAAAATGTTGGTCTCAAACCTAA
TCTCATTGAGCCCCCCATGGTTTCCTTGTCAATTTCAGGCATGAAAACGACAACGTGATT
TTTTTCATCAATGTCTGGATAAAATTCTGCCGAATGACTGTCTTTTCTTCCCAACACACT
ACGTGTAAATTCAATGGTGGCAATTTGTAAACCCAGGCAAACCCCTAAGAATGGAATGTG
ATTTTCACGAGCCCATCTAGCAGCCAAAACCATACCTTCAGTACCTCTAACACCAAAACC
ACCGGGGATTAAGATACCGTCTGCGGTACTGACCATGTTCCATGCTTCATGAAATTTAGT
TTTGTTGCTTTCTTGTGCTTCAGGTTCCAAATCAGTAGCTTCCACCCATTTAATGTCTAA
CTTACGACGACACTTCATGGATGAATGTTCCAATGCTTTTATCACTGATAGATAAGAATC
TTTCAAGTTGGTGTATTTCCCAACCAAAGCAATCTTCACTGTTTCCATGGATTCATCGAA
GTTACCTGTTGTGGCCTTCCATTTAGACAATAATTCCAGGCCTCTTTGTTTTTCTTCTTC
TGTAAGTGATATTTCATCTAACTTTAATCTGGCGTGTAAGTAATCAATCATCTTTTGTTC
CAGTAGCAACAATGGGACGTGATAAGTAGAATTAACATCGTGAACGTTAACCACCTGTTC
AGGCCCCACATGACAAAACATGGCAATCTTATCGATTGTTGGTTTATCCAAAGTTTCACT
ACATCTACAGGCGATCATATCTGGAACTAAACCAAGAGACCTCAAACCTTTGATGGCAGC
TTGAGTTGGCTTAGTTTTTTGTTCACCGTGGATGACAGGAACTAGAGAAACGTGTATCAA
GGCAAAATTTTCCTTTCCAACTTTAAATTGGAATTGTCTTAGTGCCTCCACAAAAGGAGC
ACTTTCAATGTCACCAACTGTCCCACCCAATTCAATGATACAAACATCTGGTTCCATACC
GGTGTCATCTACAGGAATTTTGGCCACGCGCTCAATCCAATCTTGGATAGCGTTGGTCAA
ATGAGGGACAATTTGCACGGTTTTGCCTAAATAGTCACCTTTTCTTTCCTTAGCAATAAC
GTGCGAGTATATTTTACCAGTAGTAATGTTATGATCTTTAGTCAAAGTAACTCCAAGGTA
TCTCTCGTAGTTACCCAAGTCCAAATCTGTTTCACCACCGTCGTCAAGCACGAAACATTC
ACCATGTTCCAAAGGAGACATAGTACCTGCATCAATGTTCATATAAGGGTCAATTTTAAT
TGACGTAACCTTTAAACCGAGGGTTTTCATTAGCATACCAGTTGAAGATGCAAGAACACC
TTTACCGATACCCGAAATGACACCACCTGAAACAACAACGTACTTCATTTTCTGTCTATA
AGTTTCTTTTGTTCTATTGACCAATTCACTGAGAAACTGCCTGAAACTTTTTCGACCTTA
GAATGGCAGAAAAATGGCAAATACTGTAAAATACTTAACATTTAACTAAATTTTATTCTA
TGCTTTTCCTCTCGATGAGATGAGCTGTGAAAAATTTTGAAAAAAAAAAAAAAAAAAAAA
AAAAAAAAAATTTGTTATCACCAATAACGAGAAACCTAACTCTAAAACTTAGGGTCAAAG
AACAGAACCCTAGGCTTTGTATCCAGTTGAATCACTAATTACGAAAGAATGCTGGTGGAA
ATAATAATATCATATTGGTGCTCAAATAACAAGAAGACTTCTTTGGAAGAAATTATTACC
AATTAACAGTCCACTTGTAGAGCGTACATATTGCCGGGAAGTTGATTACCTTTCACCAGA
GGTACAGAGGAATAGAATTTTGCAACATGTTCCCCTATTTAACAAGAATGAATTTATCCA
TAAAGATGGGAGGGCTAACTTTAAAAGAAAGTTCCCCCAATGCTTTTTTAAATAACACCA
CTATTGCTAGGAGATTCAAGCATGAATATGCCCCACGTTTCAAAATCGTACAGAAAAAGC
AAAAAGGTAGAGTGCCAGTTCGTACAGGTGGTTCAATAAAGGGATCCACTTTGCAATTTG
GTAAGTACGGATTACGACTGAAAAGCGAAGGTATTAGGATATCCGCGCAACAGCTGAAGG
AAGCAGATAACGCAATTATGAGATATGTCAGGCCTTTAAACAATGGTCATTTGTGGAGGC
GTTTGTGTACAAACGTTGCTGTATGTATCAAGGGTAACGAAACAAGAATGGGTAAAGGTA
AAGGTGGGTTTGACCACTGGATGGTGAGGGTACCCACAGGGAAGATCCTTTTCGAAATAA
ATGGTGATGATTTGCATGAAAAAGTCGCACGGGAAGCCTTCAGAAAAGCAGGCACCAAGT
TACCTGGGGTATATGAATTTGTATCCTTGGATTCTCTGGTTAGAGTTGGATTACATAGTT
TCAAAAATCCTAAAGACGACCCAGTGAAGAATTTTTACGATGAAAATGCAAAGAAGCCAT
CAAAGAAGTATTTGAATATTTTAAAGTCTCAAGAACCACAGTACAAACTCTTCAGAGGAC
GTTGAACGGATTGAACACACCATGTATACATGTATATAACTATTGAAAAATATCGATATT
CACAATCAAGTAATCTAGCCATGGCTATGAGTTTATTAATTCTAGTATGCACTGTATACT
CTCTGCGGAAGAATAGGAGTTTTTCCCCGGAGTGAGCGCTGAAGAAACACATGACGACGT
GAAAAAACACTTGTTTGATCCAGCTGAGGTATAAACACTGAGAAATATTTGAGGGTCAAA
GAAGCACTAGGAACGTTACAGTTGGAATTTGCTAGTCAATCGAGTTTCCAATTTCGCAAC
CTTTATTATAGTACTAATCTTATAAGCCATGGATCGCAAAAAAACACTTATAAACTCAAG
TGTTTCTAATAATAACAGTACCATCAAGGGCCTACAGTTATTCATTGCAGATCTTCGTTC
TGCACAACAAGCACAAGAGCAGGAAAAGAGAATACAATCTGAAATTGTCAAAATTAAACA
GCATTTCGATGCTGCAAAGAAAAAACAAGGCAATCACGACAGATTAGGTGGCTATCAAAG
AAAGAAGTACGTTGCCAAGCTAGCCTATATATATATTACTTCTAATACGACAAAACTAAA
TGAAATTTTATTCGGGTTGGAGCAAACGGTAGAGCTGTTGAAGTCCAGCATATTTTCTGA
AAAATTCATTGGATATATGACCCTTGAGTTGCTTTATGAACGTAGTGAAGTTGTTGCCAA
AGTTAACGATGAGGTGAATTATCAACTGATGAAAGATCTCTCTTCTTCCGATGATAATTT
CGTAATGTTGGCGCTGAATTTTGTTGGTGTAGTAGGAGAACTTACGAACCGTCTAGCGTA
CAACGATGATATCACAACAGGAGTATTCAAGATATTAAGATCACCGACCTCCTCCATTTA
TCTCAAGAAAAAATCAGCATTGTCATTTCTAGCACTATTGAAAAGTAATCATTCTATACT
GACCGAAGATTTACAACGTAAGCAACTATGGATACAAAGGATATTAAGCTTATTGGATGA
TACGGAAAACTATAGGTTAACTTTAGCTACGATTCCGTTAATAGAATTCATTGCAAAATA
CATTGATCCCAGTTACTGTACGAGACTATTACCACAGCTAACAGAAATTTTGTACAATTG
TGTTGTTGTTGGTACTTCAAGATCTAGTGACAATCAGTTTCCGTTAGAATATACGTTCGC
GAATATGCCAAATCCTTGGCTTATCACAAAAGTTGTCTCTTTGTTGAGCATATTGATTGC
CTCACCAACTGAGAGGGATTCTGGCTCATTACTACAAACCAACAACATAGATAATGAATT
ACTAAATAAACTTCGAAAGTGTGTTTCCGTTGCCATCGAATTAGGAACCAGACAAGCTCA
AGATCCCATGGAACGTATCGTCCAAAACACAGTATTGTTTTCATTGATCAATTTCGCCTC
TAAGCTAGATCCGTCGGATGAAGCTATCAGCAATTCTGTGACAGCCTTATGTTCCCTGCT
AACATCTAAGGAAATTAATATTCGGTATTTAACGCTAGATTCATTGGTCAAATTATGCTC
ATCAAGCGGGAAACCTGCAATTGATGCCGTTCGTTACAAGAATTTGGATATGATTTTTCA
TCTTTTGAACACAGAAAGAGATTCATCTATTGTTAGGAAGGTTGTTGACTTGTTATATAC
CTTTACTGATGTTGAAAACGTTAAGATTATTGTGGACGGTTTACTGCAGTATATTTTATC
TCCGAAAAATCTTGCTGAACCGCAAATAAAATCTGATATTGCAGTTAAAATAGCTATTTT
GACCGAGAAATATGCCACGGATATCAATTGGTTTGTAATTATTTCGTTGCAGTTGCTATC
ATTAACTTCAAATACAACTATTAACGATGATGAGATCTGGCAACGACTATGTCAAATTGT
AGTGAACAATCCATCTTTACATAGAATAACATGTGAACGGTTGGTGGACTATTTATGTAA
AAAGCAAGCATCTGAAGCTATTATTAAAGCTGCGGCTTTTCTACTAGGGGAGTACTCAAG
TCTCATAACAGACAGGATTTCAAGCGCAAATTTATTTACTTTGTTTGCCGAGAAATATTT
TAGTGCACCAAATGTGGCTAAGGCGATGATATTGACTACGATGATCAAGTTGTACAAGAC
CTCACCTGAGATCGGCTCCAACGTCATCAAATTTTTCCAATTGGAATTGAACTCTCTTGA
TATTGAGTTGCAAACAAGATCCTTCGAATATCTCAACATTATTCAACTGGCTAAGGTGAA
CGGAAATACAGATATTTTGCAAATTTTATTTGAACCAATGCCGCCTTTTAACAGCAAATC
TAATCCATTATTGAAGAGATTAGGGTCACTGCCGGCATCAGCGGGTAGCACAACTTTAAT
AAATACACCATCCGAAGCATCCTCCTCCACGCCTGACTTACTATCAAAAAGAGCAAACTC
TTCCAGGTCGATCATGGTTCCCATGCCCCCACCATCTCGTAGGAACACCATTGATGATGT
AAATTCCAAAATTAGTTCATCTGAAGACTTTTCAGGAAAGGACTCTTATTATTCAAGGCA
GATCCTCGCTCCAAATTGGAGGGAAGGTTTCACAAGAATGATTTCGCATAAGCAGGGTGT
GCTTTTCACATCATCTTTGATGAAAGTTTTCTATCGGATAACCACTCCTGATGCACAACA
GCCATACGTGTTTCATATATCTCTTGCCTTCATTAACCTGACTGAGTGGGAAATCACGGG
ATTATCCACACAGATTATCCCTTCAAAAACGCAAGGTAATCCTGAGTATTTAATTATGAA
TATTAATACACCTTCTACTGCTACTATTGGGCCCCATAAAAGGGCAGAGCAAAGCTATGA
AGTTTCAATAAGAAAACCTTTCGACGTTGAAGATAGTCCAATTTTGGCAATTCATTTCAA
ATGTGGCGGTAGTACAAACACTATCAATTTGAAAACTGCCATAGGCATGACTACAACACT
AATTAGCAGCGATGTCAATCCTAGCATGCATTTGAATTTGGCACAGTTCATCAGCCGTTG
GAAGACTTTGAGCGATGCTTTGGGAAAAGAGGGAGAATACCAAAAATCTGGCATAAAGCT
CAACAAGGATTTTAGAAAAGTTGAAACAATCAGTTTAGAAGACGGACTTCTACTATTGAC
GCAAACAGTGAAGAGGTTGGGCTTTGATATAGTCGATCAGACCAGTGTTCGTAGTACATT
GTTTGTCTCGGGTATTATTCATACGAAAAGTGAGGGAAACTTCGGTTGTTTAATGAAGAT
ACAATACCAGGTAAATGGAACAGTTAATGTTACCTGTAAAACAACGACGGCCGGTCCCCT
GGCGAAGTACATTGTCGAATGTATAAAGAATGTGCTTACGAAGTAAAATTTTCTCAAATT
CACTATAATGAAAATCATCCGCATTGTACATATATAAACACACACACACATATATATATA
TATTTGAGATTCTATTTATTTTCATTTTGTGTTGTAATGCTATAAAAAAAAAGATCTTCG
TATAAAATCTCAGTTCATTCAACCTACTAAATGATTCTAGCTTCATTTTTTGGAGGTCTA
GCACCAAAAATGTCGGTACCAATTCTGACTTCCGCTGTTCCTTGCCTTATAGCCTCCCTG
AAATCAGCACTCATCCCCATAGACAATTTCAATGATGTACCAAATTTAGCATCAATCTTC
TTCTTCCACTCAACCAGCGTAGCAAAGTCTCTGTTTTCTTTGCTATCTTCATGAGAGACG
TTCCATGAACCAATAGTCATTAACCCATTCAACTTAATATACTTGCATTCTTCGGATAAG
AAGAAGTCGATGACTTCAAATATTTCTGCTTCATTATTCAAGCCCGATTTTTGATCCTCA
TGGGAGGTATTAATTTGAACATTACACAATATTGGGTTGCAATCTGGTTGAAATTTAGCC
CTCGATTCGTTTAATTTTTTGGCTTTCTTCAAGGAGTCGATTGTTTCAACAGAGTATAAA
TTTGGCACTTTAGCCAAATCTTTACATTTATTCGTTTGCAAACCGCCAATAAAGTGCCAC
TTGATATCGTCTGGTAGTAATTTTGCCTTTTCGATCAACTCTTGAACATAGTTTTCCCCG
AACTCCCTCACACCATGGTCGTAAAGAATTTGTATATCGCTAGCTGGTTTCAATTTCGAA
ACAACCAATAATAAAATTTTGGAGGCATTTTCATTAACATGAACATTTTTTGCCTCTGCA
TTCACAACTTCCCTTACAGATTCGTATTGGGCAATTAATTGTGTCTTTCTATCTTCATCA
TAAGTAATACCAGTGGACATATTGCAATGTGATGCTGGAATCTTAGTCAAAAAGGAAAGA
GTGATGCCTATCAGTTTTTTTTTTTATTATGCATTTAAGAGTAGTCTCTACTTATGAACA
TTTTCTCTGGCCTCTGATCACGTTACTTTATTACCCGGATACTGATCATGTTATGGTCTT
TAATCAATAAGTAAGTTATAGAGCCAGTTTCAAGGTCGATAGTTCAGGTGTATAACAATA
CTTTTTGGTGCTACCTTGAGCTATTCCATTAGTTAAGTTTGAATTAAATATATCAACTAG
CAATCAAGTCAACTCTAGCGCGCTTCCACACGTTGTGTAGATAAACTGGCTCTTCACCTT
CAACAAGCGTCAATTTCCCGTCTTCAAGATCAGGGCATTGGACAGTAATTTGTGCATAGG
ATCCCCTGTTACCTGTTGCTCTAATAAATCTTCCGGGATTTATAACAACTACGTTTTGGA
CAACTCTTGCAAAGTGTTGTAATTCACTGGGTATAATCATTATGTCAGGCGAGAACCCAC
CAACAAACTCTGTTAGTCCCAGATAACTCACGTCTAAATCTGCACCAGATATATGTTCAT
AAACTTTTTCTTCTTTGCTTTCCATATCATTGGTTTCCTTCTTCGTAGATACGTCTTTTG
GTTTTATTCTTGTACGAATACTACCTGGAAATATGGGGTAATACCTGCGCTGTTGTAAAA
TATGCTCAGAAACACGATCTAATCTATATCTTGATGAGGTAGTACCGCCTTTTATGACTT
CCTTTAGATCTTTGAATGTATCAACGTTTGAGCAACCGAAGTATATCTCATTTATTTGAA
AAGATGAAGGATTAGCCATGCATTTGAAGTTCCTTTTAGGCAGCTGTAAAGCCTTTCTAA
TTAAAGAAGCTTGTGGATATGCGGCGTGATTAGAAATTGCATCTTTTGTGGAGGGTATCA
ATACGGTTTGGATATGTGGTGATATGGTTTTTAGAATAGGAGTAAATAACTTCAAAAAAA
GCTCGTCCAATGTTTTGGGCTGTGTCTTGAACTGGGGAAAATTTGGCAATTTACCACTCG
CTATCAGAGGATGGGTGATATCTATAAATGGGCCAAACATTATCAAGACGTGAGGTTTTA
CCTCATTATTTATACTATCGATAAATTCTTGCAACAATTCGAGGGAGAAGTTATCATTTG
CAAAGTATGGGCCACAGGTCACGATAACCTTCAAAGAAGAACCTTCCAAATTTGCTTGAA
ACTCCTGCAGTTCCTGCGATGTGGACACTGGGGAGTTTGGATAAGGTAGCGGCAAAATAG
AGTTAACGGTGAAGTAATCCCCATTAGCATTTTTACCTTTGAATGCCACAATTTGGCCTA
AGAAAAACGAAAGCTCGTTGACCTGCGATAGATCTAACCTTACCCTTCTTCCAACGCCGC
CCATTCTTGAGGTCTCTAGGGAAAGCGATTCTGGATTCAAAAACTTGTCGTAGGTCGGCG
AATCTGGAACTATCCTTCCAACAGCATAAATTTCGGACTGAGATTGAATAGTTGGATCAG
CGAAGTCGTTTGGAGATAACTTATAGTGATTTTGAATAATCTTAGTAAACGATTCAATTT
GATCATCGAGGACATCAGACGCTTCCTGTAAGTTTTGCCTCATTGTTCTGAATTTATACT
TTTTAGCATCATAAAATGGTTCTACTTTGACCTGGTTATATGATGGTTCTTCAGTCGAAA
GAAGGCCTACATTTGGATTACCAGATGATATTTCAATATTTTCAGGGTTCAAAGAATCCA
AAATTTCACCAGCAGGAACATTTTGCCTCGATGTGGTAGGAGTGTTTGTTGTTGGAGTTT
GGAATGTCGACGAGCCGGGAGTCTTGGCATCCGAGCTTTTAGCGTGGGACAATGGAGCAC
TGTCACCCACAGCATCTTCTGCCATGCCTGGAGTAAACTCCAATTTTAAAGAACTATTTC
CTTTTTCATTTGTTTCTGCCTCAGAGCCTACATTATATGTTTGCTTGGAATCACTGAGTG
AAAAGGGACCATGTAACTTTCTTTTTTTTAAAGTCGGAGTCTTTGGAATACTAAGGCCAA
ACAAGGGACTTGAATTCAAACTTTTTTTAATCACTGGTTTTTTTGTGGATGTGTTTACCT
TAGAGGACGATGAAATTTGGTTAGCACGCTTTTCCATTTGTAATTGTAAAAATTGTTTAA
ACTCATCTATGTTCTTGGAAGTCAGATCTGTGTGAGTTTGACGCCTTTGATTGGAGAACT
GCTCCCATTTAATGTATAGATCCTCGACGGACAATGCATGCAGTTTAGTTAAATTCTCTA
ATGCAGTGATGATTTCCGGCTTGTCTGCATCAGGCCCAAAATGAGTGATGACATCGATAG
ATCCGCTCATTTTTTTTTTTTTCAGTCACTTGCTCCTGCCTAAATTTACCTTCAAGCTTT
GTTGAACCAATTGACAATCAATTATCTTGATATTTTTATATGCAAATATATTATGTATAT
GAAACAAAATGTTATATGTGTCTACAAAGAGCTCATATTATTACAGTTTTAGAAAAGAGA
AAGAACTAAGAAACTCTGGTGAGACGCGTCACGGTAAAAAAAAATTACGCGTCTACCACG
CTATTCTCTATTCGTTTGAGGCGATGAACATGATCATTTTAAAGACATTCTTAGGCAAAC
AATCGAATAATCGTTCGGTTTCTTGCTCAGTATAATCTGGAGTAGTTTGGAGGACTCTCA
AACAACGAGCTAATACCACGGCACTGGTGAAGTTCCACGAAGTATTATCAGTCCCCATAA
TGAAATAGCTCATTGTTTGGATAATCTCTGATATATTAGATTTCTTGAATTGTTGGCAAA
TGGTAGGAGATTGCAGCATCTTCCATAAGGTCTCAATTAAAAATGTTTCTTTCACACCAG
CGGTGTCAGGCTGAATTTCAGTAACCAACATGCTTAGAATTCTTGTTGCCGAATGTTTTT
TGAAAAAGTGCGATAACATTAGACTGTCCCTGAACTCTTGCGCTAATTTATAGATTTCGT
TTCCATAATCAGAAAATTTATTAAGCATTAAAAGGATCTGTTCCCATACTTCTTCGAAAC
ACATTCTCACCGAAACGCCATCATCGTCGGCATTCTCGCTTAGTGTATTTAGAAACTTTT
TCCAAACCAAAAGACAATGAACGAGAATTATGGACTTACTGGATATTTTTGATGGAATTG
AAGGCGTGTCATCAGTAGATTTCAAAAGCATAATAGCAACATCCAGTAGTTCATCAAAAC
CATTTTCATTCGTCAACCAATCGGTCATTTTTTGATTTTGAAAACAAGTAATCAAGGGTT
CGATCAGGTAATTTATATGTTTCATAGTGAACGATCCACTTTTTATCCTGTTTATTGCCT
TTGACATGTGATTGAAATAGACATCAAAATCCATCAAAGTGTTGCCATTAGAATCAACCA
TTAAAAGATGACTAATTTCATATACAGTCAAGGAATCCCTTGGGAAATTATCCATGATAA
GCAAATGCATCTTCTCTGATTTTTTGTTATTAACTAGTTTCATCTTTTTGGAGTTTATGT
CTTGTTCAGTTAGTGCTACGTCTCTTTCTCTCTTTACTGTGATCCTTTGCTTTTGACCCA
TATTCTCGTCCCCGTTTATTTTGATTGGTGACATTGTTTCCAAATCAGGCTTTTCATTCT
CATTCCCATTTCCAATAAGTTTTTCTGGCTCATTTATTATCTTTGGAGGATCTGTACTGA
ATTTTACTGTTGGTTCATTATCGTCCTTCAATTTCCTTTCGGTATTTTCACCACTGTTTT
GAAAAATTTCACTTAAATTCAAATCAGATTTTTGAGAATTTTCCATATCTATATCATCTT
CCTCCTTTGCTGGGTTTGGCTGGTCCAGTTGATAAACACTTACTATTTTCGTCATTTCTG
AAAGCTTTTTATCTTTGTCATTATCATCATGAATAACTACGCTGTCTGTGCTTGATGTTC
TTTTTCCAACGTTATTCTTCAACTCTAGTGTTTTATCAGTTTCCAAGTTTTTGAAGGGAT
TAATCATTGTCATTTCCATGCATTTCTTAACATCATTTTCGTCTACAGCATCGTCGGATT
CCTCATCCCCTTCAGATTTTTTATTGTCGATGGGAGTGAAGCTTACAGAACTTTCTCTAG
AAATGATGTCTTCTACCTTAAAGTTGGCATCCTTCTTTTCAAGTTCATGACAGATTTTCA
TCTTGGTAGATACAATGTCAAAATCAGCTAGCAATTTATTAAAACGATTATTATCGAATT
TATAAATTTCAAAAATTAGATTGAAATAACATGTGTAGTCAAACTCTTTACCGTAGATTT
GAAAGAGTATCATTGATATTTTAGGCATGAGATCGTTCGTTCCTGACCTCAGAGTGTTAT
CATGTTTTATGTTCAAGTTACGGAAAATCTCTAAAAGTAACTTGAAATTATAATTGAAAA
AAGTGGTTTTGTATTTCATATAGTATAGTTTGAAATCATTCGGACAATTATTGGCATTCA
AGAAATTGAATAAATCCGCGATAGTTATAATCAAGTTAGTAAGCTCGTAGGGCTTTTCAG
GATTCATTCTATTCTTTAAGATTTCCGCGTAATCAAAACTATTAATAGAATATAGCTCAA
TGAGGTAATTTAAGGGAACTCCATTTGTAAACTTCTCTATACTCAAAAATGGCTTGAAAT
CATTTGGTGACTTTATCATAATTTGGCGTAGCTTTTTCATAATCATGGGAAATTCAAATT
TTGGGGCTGATGATGACTGTTGCGATGTCAACAGTAACTCCTTTTGTAAATACTGTAAAG
CATCTTTGATCTGAGCTGGAAACGAAGCATCATTGAATTTTTTGTAAAGGGTTTCATATT
CACCAAGTTTATTACTGCCTTTTAATGAGATTGGAGAAGATGACATCGAAACATCATTTT
TATCCATATATTTCTTTATCAACGGGTTAGAGTAACTATTTGATAACTCATCAGTCAAGT
CGATTTGGTTTGACGGAAAGTCATCAAAATTTGTGTAATTTTCAGATACTTTTGTGGCGG
CAGTAGAAGAAGGAGGGGCACTAACTTTTCTTTTAGTAACATTATTATTATCTTTGGTGT
TGCTGTTTGAAACAGAGTTCATACTGTCATGATGCCTTGCCCTTTTTTCATTTTCTTTAC
TTGAATATTCACTAGTAGACCTTAAGTTTGTTTTCAGCTTATTTGATAGTTTACTGGCTA
TGACACTTCCACCAGCTGTGACTGCAGGAGCGTTGAGTAGGGAGGTGGAGGAAGATTGAG
TCGGTTGGGCATAACTTGGATAGTTCCTTTTCTGCTCCAGTAAACTGGTTTTTCTTGAAG
AATTATTCGAAGAGTGAGAGTACAATCGAGACGTTGCAGAGGAGGCGGAGGCAGTAGAGG
ACACCCTGGAAACTTGATAGTTTATATTCAAATGAGCAGGGATTGCCAATTCTGTTGCTT
TTTTCAACTGTGGAGAAAAGGAAGAACTCAATAATCTTTTGGCATTTGTAGGATAACATT
TGTAGAAATACCAAAAAGTTAACCTCATTGCCTCTCTAACGGTTGTCTGTGAATCTGAAA
TGCCCTTTTTTAGCCATTCTTCGATGTATATGATGTTATTCTCCAACTTTGAGGTTGGCG
AAGTTGTATTTGAATTGTTGAGCGAAAGATTGGAGTCGTTGAACTTAATCAGGAAGCTAC
GCAGCAGTATTGCAGAGCAAAATCTCGGTGTTACGGTTTTCTCATTTATTAATAAAAAAG
ATAATTGGAATAGTTTATTATGGAAATGATTTATATCAATGATCAAAGTAATTAAACAAT
GAAATGCAGTTTGTGAAGAGATTTTCTTGGTAGATGATAACAAGTTCTTGAAAATGACAA
ATATTTGGTCCAATATTGATAGGGGCAACTGATCGTTTAGGATATGGATTAGCCTCTTGA
GGAAAAGTAATGCAGTTAATGATAACGTTGTCCTCAACGACGAGGTAGCTCTTGAAATCA
ACTCAATCAACTGCACCTCCTTTATTACAGTGACAAATTCCTCTGGATTATCTTTGGGAA
TGTTGCCGGATATAATGTTGTCTAATTCAATTATATTTGATTGCCTTAGCTTCCAATTTT
GTTCTGTTTCCTTTACACTTTGGAACGGTGCCAACAAATTCTCCAAGTCTTGTTGTAATT
GGTTCAAAGACTCATAGTTTTTTTTCATCGCTGGGTCTTTACTGCTCAAGTTGTTTGATA
ACTGCGGCAATTTCGCTTCGGCTAATAGTAATTGAAACTCGTACTCTTCGTCAAACAAGG
TCGATTTATCTTCTTGTGAACCATGCTGGTCCTGTGACTTTGCTAAACTTATGAATTTTT
GCTTGAATTTCTCAACTTCTAAATCGTTAATAAATCCATCTATCAGATCCTGTGAATTTT
CGTCATCCATTTTCAAATACTTGTACATTATATCGAAAATAAGCTCTATTATTACATTAT
TGTTATCATCGTTTGCGTGTTCATTTAGGTTGTTATTTAAAAGGTTGGTGAAAGACAGCA
TGAAAAACCTCAGTAGTTGCAAATGATTTGAATTATTTTTCTCGTTGATCTGGATCAACT
CATCGATGGTCAATAATGTAGATTTTATCCTATTCAGGTAATCTCCGTTTTGGTTTTCAC
TTGGTCTTCGCAAGAAATTTGCTAGAATAGCTTGGATCTTCGATGGATTAACCAAATAAA
TGGCTTCAATGGCTTTAATGGAAGCCAGCCAAAATTTCTTCTCATTAGGCAACTCGAAAA
TTAAGTGGTTTAGTAATTGCTCAACTAGAGTGTCATTGAATTGTACTGGAGACTGCATGG
CCACACGTTTGATAAGGTAACAAAGCGAGGAATGTGATAGGAAGATTAACCGCGGGTACG
AACGGTAAGCGTAATGGCCGGAGATGAACAGTAACGCAGCGAAATAAGCTTGGATCGACG
ATTCGTTAACTAGTTCCTTTTTTACATGTCCTTTGAACCGTGTAAGCAGTGCCATTTTTT
CCTCGATGGGTACAGACTCGTCCTTGAATACGGTATACAAAGGGAAGGAATCGTCTGGAT
GTGTATTAGTGTTGCTGTTATTATTGGTCTCATTGTTGAAGGACGACATTATTTCTGAAG
AATACAAGGTCTCTCCAAAAACCCTAATAATTACCGCTAAATATGCCTGTCAATCGGATG
AAGGGAAGTTTCAACCTCAAATGTAAATAAATAGATGTTTAGCGTTTTAGAATAAATAAG
TAAATAATTTGATTTTCTATAAAGATGTTAATGCGCCAATACGCGCCGACGGGGTAACGC
ATTAAAATAACATGGTATTTTCGTTTCATTACAAAAAAAGCACTATATGTACTAATAATT
ATGCTACACTTGTGTTTATATTGCCAGCGTCGATGTTGATGACAACGCAGAGTTCATACG
GTTTTGGTTTTGGGCTTCACTTGTCTCAGTAGGTTGAGGGTTTGTATGAAGTTTCAGAGG
CTCCGTTAGTAAATGACCCATTCTTTCTATCTTGGTCCTGAGATAACCTTCTATCTCCTT
GGAGTCTATGCCTTCACTGGAGTTTGTCCAGTGTATGGGTACCATAGGCACTCGTTCAAC
GCACTTAAGGTAAGGCGCATGATCTACCTGTTTTATCTTTTCCGGGTTATTTGTCAGCAG
CCTGACATTACCGATGCCAAGATCCAGCAAAATAGCCTTACCCAGCGAGAAGTCCCTAGC
ATCCACGGGATGTTTCAGCATTAAGTTGGCCTGCACTGTGTCAGCACCTAAGTCTTGCAG
GTTGTAGGCCTTGAGTTTCTCACCTAACCCGATGCCACGACCCTCTTGTCTTAGATACAC
GATAACACCATGGCCGTTTCCACCTTTGATGTTGCTTGTGGGTTCGTGGTCGCAAGCGAT
AAGCCTACCGGCCCTATCGAATTGTTCACCACAATCACAACGGGCGCTCCATGCGTTTTC
ACCGGTGTAACATTCAGAATGGATCCGTACCAGCGTGTCGTTATGGGCGTCCCATGTAGT
GGCTTTGGAAGCTAATAACTCACCTGTACTATCATCAAACTCCAGAGCTAATCCGAGTCT
ATCGTCTTCGTCTGCCACAGTTCTGCCGGGATACAGTTTGCCAATATAAGCGCCCCTGAT
CATTCTATCTTGTTGCGTCTCGCACTGTCTTCTACGGAATAGCGAGCGCGACCGTATGTC
TTCACCAAACACAATGGCTAGATGTTCCTTGTTGTCCCTGTTGTTACTGTAAAGATGTAA
AAAGATATCCGGACCCTGTGTGGTTGGGATACGAGCTCTTGCGACACATTGTACTAGAGG
CAAGCCGCCATCGCCGTTCCTGCCATCACCCGTACCACTAACCTCGTATTTGCTGCTATC
CTGTTTACTGTTGTCGTAGTTATCTATGGTCATCCTGTAGGTTTGTTGTAGTTTTATGTA
CGCCACTTTTTGTAATGACTCAATTATTGTCCACGCCAGCACAGCAACTTCTTTATATAT
ACTATAGCGGCGCTGGCGCTCACCCCACAAGAGCGTCCGACTAATTTCTGACAAATCGTA
AAAAGAAAAAGAAAAACTCAAAGGAAAAAGAAAAAGTCTCACCCTACACAACTTGTTTTC
AAAAACGGTATAGACCCTACTATTTCTGTTTTAGCCCTATGCTAAGTCTAGACATTACCC
TATCCCTTTTAACGAAAGCCCTTTTGTTTTTTTTCTGTGTGTCCGGCCGCTCAGCCAAAC
AACAAACAAGACTATAATCTGGAGCATAAGTACCCGAGCATATATAACTACTTGGCATAC
GAAGTAAAAGCATATTGCTCCCCACTCCTATCGCGCGTCCCCTGTACAACAAAGCATCAA
CTTATCGGGTAACTTAGAGACAGCATTAGTATATATACCAGCCATGTCACAGTTCTTCGA
AGCTGCTACTCCCGTTGCAATTCCCACAAACAATACCAACGGCGGCTCCAGTGATGCCGG
CAGCGCCGCCACTGGCGGCGCCCCCGTTGTTGGCACCACCGCTCAACCCACCATCAATCA
CAGGCTTTTGCTGTCATTGAAAGAGGCTGCCAAGATCATTGGCACTAAGGGCTCCACCAT
CTCACGCATAAGAGCTGCAAACGCCGTCAAGATCGGTATTTCTGAAAAGGTGCCCGGTTG
CTCTGACAGGATCCTGTCCTGTGCTGGGAACGTAATCAATGTGGCCAATGCCATTGGTGA
TATTGTTGACGTGCTTAACAAACGGAATCCCGAAAATGAGGACGCAGCTGAGGGCGAAGC
GGAAGAGCACTACTACTTCCACTTTTTGAACCATATTTTACCAGCTCCCTCAAAGGACGA
GATCAGAGATCTGCAGCAACTGGAGGACATCGGTTATGTGAGGCTCATTGTGGCCAATTC
CCATATCTCATCGATTATCGGGAAAGCAGGCGCCACCATCAAGTCCCTGATCAATAAGCA
CGGCGTTAAGATCGTGGCTTCCAAGGACTTCTTACCTGCTAGCGACGAGAGAATTATCGA
GATCCAGGGTTTCCCAGGATCCATCACCAATGTACTTATCGAAATTAGCGAGATCATCTT
GAGTGACGTTGACGTCAGATTCAGCACAGAAAGATCTTATTTCCCTCATCTGAAAAAGTC
CTCCGGTGAGCCAACTTCCCCTTCTACCTCATCTAACACTAGGATCGAATTGAAGATTCC
AGAACTGTATGTAGGCGCCATTATTGGCCGTGGAATGAACAGAATTAAGAATTTGAAAAC
TTTCACAAAAACCAATATTGTCGTGGAAAGGAAGGATGACGATGATAAAGACGAAAATTT
TAGAAAATTCATAATCACAAGTAAATTTCCTAAGAATGTCAAACTTGCTGAGTCCATGCT
TTTGAAGAACCTGAATACTGAAATTGAGAAACGTGAAAACTACAAGAGAAAATTGGAAGC
TGCCGAAGGAGATGCCACTGTTGTTACTGAACGCTCTGATTCTGCTTCTTTCTTGGAAGA
GAAGGAAGAACCTCAAGAGAATCATGATAACAAAGAGGAGCAGTCGTAGTATATACGTGT
GCGTGCGCACGTCCCACACAGACAAAACAAACTATCATCTTAACGAATAATGTTGCATCA
TTACTAGTTTAAACTGTATTTTTATTAAAGGGAAAAAAATGATTCAATATGTATATATTT
ATTCATGTATATGTATTTTGAATTAAAAAAAAACGTTTTATAAATACTCAATAAAGCCGT
TGTATTTTCTTTATTACTATCGAAATTCTTGCTTTAAACATTTCGCGCATCGCCGGCTAG
AGGCACAGAGAGGGAAGGGGAAAATAACATGAAAAAATCGTAAGTTTCTAGGCAATGGTA
TAAACAAATAAACAATAAACATGCAATTACAGCTCTAGAACACATATTATCTTCATGGAT
GAATGATAAACTCCAAGAAGAGCATAACGAAAAAGACACCACTTCACAAATTAATGGTTT
CACGCCGCCGCATATGAGTATAGACTTTCATTCAAATAACAATAGCAATATCATCGAGAC
TATTGGCGTTTCCAAAAGATTAGGAAATTCTGTATTAAGTGAACTGGATTCTAGAGCTAG
CTCAAAATTTGAATTTTTAAAAGATCAATCCGAACAACAATACAACGGCGACAAGAACAA
TGAACCAAAATCGGGCTCGTATAATATTAATGAGTTCTTCCAAGCAAAGCACGACTCTCA
ATTTGGCCAGATGGAGTCGCTAGACACACATTATACCCTTTTACATACGCCCAAGAGAAA
GTCACAACATGCAATCCCACAGGATCGATCGGATTCGATGAAAAGGTCGAGACCGTCCCG
CTCAATTCCATACACTACACCAGTGGTAAACGATATCACAAGAAGAATACGAAGATTGAA
ATTACGGAACTCATTGGTTAATGGTAATGACATAGTGGCTAGAGCGAGATCTATGCAAGC
AAATTCTAACATTAATTCAATAAAGAACACACCATTGTCAAAGCCCAAGCCATTTATGCA
CAAACCAAACTTTCTAATGCCCACTACGAATTCTTTGAACAAGATCAATTCCGCTCACCG
TAATACATCCTCCTCTTCGACAGCTTCATCGATACCAAGATCTAAAGTACACAGATCGAT
ATCAATAAGAGATTTACACGCCAAAACCAAACCGGTAGAACGCACGCCAGTTGCGCAAGG
AACAAATTCGCAATTGAAGAATTCAGTTTCCGTTTTTGATAGACTTTACAAGCAAACAAC
GTTCTCTAGGTCGACGTCTATGAACAACTTATCGTCAGGAACCTCTGCAAAATCCAAGGA
ACACACAAATGTAAAGACTCGGTTGGTTAAAAGTAAGACAAGTGGTTCATTGTCCAGTAA
CCTTAAGCAAAGTACTGCCACCGGCACAAAGAGTGATAGACCTATTTGGCGGTGATTAAG
TAATAAAAAAATTGCATTTTATAAGAAACATCATGTGATGACATTTAAAAAGTGGGAAAG
AATACTACTAATATAAAACTATTTACTGGATATTTAGAATTTTTTTTTTTTCTTCTTTAT
ACGTAAAAGTTGTTCAAAAAATTTCATCGTTTTCTTTTTTTATGAATCTTTGATTCTTGT
TGAAAAGAATTTCTAAAAAAATAGGAGGATAATAATATTATCAAAACAAATCGTGTCACT
CATTAAACACCAAAAATCCAAAGAAGAAAAAAAGGAAAATGTGAGAAAGAATTTAGATTA
AGAATCAAGCCAGATTAGACTTATTTGAACTTCTTACCAAACAAGATCATTTGCAGTTGG
[truncated: 11,960,742 more chars]
